# Supplementary material for: Ursodeoxycholic acid breaks antitumor immunosuppression by inducing CHIP-mediated TGF-β degradation
Source: Research Square preprint supplement (doi:10.21203/rs.3.rs-845862/v1), 2021-09-10
Supplement: Supplementary file 3 [file 5ee701db77941583975532ff.docx]

| **Supplementary Table 3: Basic information of NSCLC patients.** | |
| --- | --- |
| **Characteristics** | **NSCLC patients** |
| **Number** | **48** |
| **Age (years)** |  |
| **≤ 30** | **0** |
| **30-50** | **7** |
| **≥ 50** | **41** |
| **Gender** |  |
| **Male** | **29** |
| **Female** | **19** |
| **Pathological types** |  |
| **Adenocarcinoma** | **27** |
| **Squamous cell carcinoma** | **21** |
| **clinical Stage** |  |
| **I** | **10** |
| **II** | **13** |
| **III** | **22** |
| **IV** | **3** |

| **Supplementary Table 4: Basic information of healthy volunteers and hepatocellular carcinoma patients.** | | |
| --- | --- | --- |
| **Characteristics** | **Healthy control** | **hepatocellular carcinoma patients** |
| **Numbers** | **7** | **9** |
| **Age (years)** |  |  |
| **≤ 30** | **5** | **0** |
| **30-50** | **2** | **1** |
| **≥ 50** | **0** | **8** |
| **Gender** |  |  |
| **Male** | **4** | **8** |
| **Female** | **3** | **1** |
