# Supplementary material for: Ursodeoxycholic acid breaks antitumor immunosuppression by inducing CHIP-mediated TGF-β degradation
Source: Research Square preprint supplement (doi:10.21203/rs.3.rs-845862/v1), 2021-09-10
Supplement: Supplementary file 4 [file b23dd1b22abb5a05971dbac9.xlsx]

## Sheet: Sheet
Supplementary Table 5: Information of patients with ICI treatment
No.	Age	Gender	Pathological types	Stage	Date of ICI treatment start	Name of ICI	ICI target	Date of Ursofalk treatment start	Date of Ursofalk treatment end	Dose of Ursofalk
Lung cancer
1	52	F	Adenosquamous carcinoma	Ⅳ	2016-01-28	Nivolumab	PD-1	2016-03-11	2016-05-10	200 mg, bid
2	54	F	Squamous cell carcinoma	Ⅳ	2018-06-27	Nivolumab	PD-1	2018-10-31	2018-11-10	200 mg, bid
3	54	M	Squamous cell carcinoma	Ⅳ	2019-11-07	Sintilimab	PD-1	2019-10-22	2019-10-29	200 mg, bid
4	60	F	Adenocarcinoma	Ⅳ	2019-10-16	Atezolizumab	PD-L1	2019-10-16	2019-10-31	200 mg, bid
5	63	M	Adenocarcinoma	Ⅳ	2019-06-28	Tislelizumab	PD-1	2019-10-10	2019-10-25	200 mg, bid
6	56	M	Squamous cell carcinoma	Ⅳ	2019-08-08	Camrelizumab	PD-1	2019/7//11	2019-08-25	200 mg, bid
7	69	M	Squamous cell carcinoma	Ⅳ	2017-10-24	Nivolumab	PD-1	2017-10-29	2018-02-19	200 mg, bid
8	66	F	Non-small cell lung cancer	IV	2019-04-30	Camrelizumab	PD-1
9	72	M	Adenocarcinoma	IV	2019-05-17	Tislelizumab	PD-1
10	60	F	Squamous cell carcinoma	IV	2019-05-09	Nivolumab	PD-1
11	63	F	Adenocarcinoma	IIIB	2019-07-03	Atezolizumab	PD-L1
12	58	M	Adenocarcinoma	IV	2017-12-27	Durvalumab	PD-L1
13	69	M	Non-small cell lung cancer	IV	2018-11-30	Camrelizumab	PD-1
14	63	M	Adenocarcinoma	IV	2018-11-27	Camrelizumab	PD-1
15	66	M	Adenocarcinoma	IV	2019-04-23	Sintilimab	PD-1
16	62	M	Squamous cell carcinoma	IV	2019-04-25	Toripalimab	PD-1
17	55	F	Non-small cell lung cancer	IV	2019-02-27	Nivolumab	PD-1
18	61	M	Squamous cell carcinoma	IV	2018-10-30	Nivolumab	PD-1
19	67	M	Squamous cell carcinoma	IV	2019-05-22	Sintilimab	PD-1
20	56	F	Non-small cell lung cancer	IV	2019-01-07	Nivolumab	PD-1
21	62	M	Adenocarcinoma	IV	2018-12-14	Nivolumab	PD-1
22	53	M	Adenocarcinoma	IV	2018-04-13	Permbrolizumab	PD-1
23	33	M	Adenocarcinoma	IV	2019-03-04	Permbrolizumab	PD-1
24	72	M	Adenocarcinoma	IV	2018-11-01	Nivolumab	PD-1
25	70	F	Adenocarcinoma	IV	2018-08-16	Permbrolizumab	PD-1
26	56	F	Adenocarcinoma	IV	2019-04-18	Tislelizumab	PD-1
27	66	M	Adenocarcinoma	IV	2019-03-07	Tislelizumab	PD-1
28	74	F	Adenocarcinoma	IV	2019-03-12	Sintilimab	PD-1
29	58	M	Squamous cell carcinoma	IV	2019-03-27	Tislelizumab	PD-1
30	61	M	Squamous cell carcinoma	IV	2019-02-27	Toripalimab	PD-1
31	72	F	Adenocarcinoma	IV	2019-04-09	Permbrolizumab	PD-1
32	53	M	Adenocarcinoma	IV	2018-11-14	Nivolumab	PD-1
33	63	M	Squamous cell carcinoma	IV	2018-02-12	Permbrolizumab	PD-1
34	54	M	Adenocarcinoma	IV	2018-09-05	Nivolumab	PD-1
35	75	M	Squamous cell carcinoma	IV	2018-11-02	Nivolumab	PD-1
36	61	M	Squamous cell carcinoma	IV	2019-03-07	Tislelizumab	PD-1
37	62	M	Adenocarcinoma	IV	2019-03-08	Durvalumab	PD-L1
38	68	M	Squamous cell carcinoma	IV	2018-04-26	Durvalumab	PD-L1
39	60	M	Adenocarcinoma	IV	2019-03-25	Tislelizumab	PD-1
40	51	M	Adenocarcinoma	IV	2019-03-08	Permbrolizumab	PD-1
41	58	M	Adenocarcinoma	IV	2018-10-22	Tislelizumab	PD-1
42	65	M	Squamous cell carcinoma	IV	2019-02-13	Sintilimab	PD-1
43	64	F	Adenocarcinoma	IV	2019-01-10	Permbrolizumab	PD-1
44	72	M	Squamous cell carcinoma	IV	2019-01-18	Sintilimab	PD-1
45	59	M	Squamous cell carcinoma	IIIB	2019-03-13	Toripalimab	PD-1
46	64	F	Adenocarcinoma	IV	2018-11-21	Durvalumab	PD-1
47	55	F	Adenocarcinoma	IV	2018-12-19	Tislelizumab	PD-1
48	72	M	Squamous cell carcinoma	IV	2018-11-07	Nivolumab	PD-1
49	54	M	Squamous cell carcinoma	IIIB	2018-11-07	Tislelizumab	PD-1
50	55	F	Adenocarcinoma	IV	2018-11-13	Tislelizumab	PD-1
51	56	M	Non-small cell lung cancer	IV	2017-11-06	Permbrolizumab	PD-1
52	79	M	Squamous cell carcinoma	IV	2017-05-10	Permbrolizumab	PD-1
53	55	M	Non-small cell lung cancer	IV	2017-01-20	Permbrolizumab	PD-1
54	62	M	Adenocarcinoma	IV	2018-12-19	Tislelizumab	PD-1
55	60	M	Squamous cell carcinoma	IV	2019-01-23	Sintilimab	PD-1
56	47	M	Adenocarcinoma	IV	2018-10-26	Durvalumab	PD-1
57	65	M	Non-small cell lung cancer	IV	2018-10-30	Nivolumab	PD-1
58	69	M	Adenocarcinoma	IV	2018-11-02	Permbrolizumab	PD-1
59	51	M	Adenocarcinoma	IV	2018-11-21	Tislelizumab	PD-1
60	69	M	Non-small cell lung cancer	IV	2018-11-06	Tislelizumab	PD-1
61	69	M	Squamous cell carcinoma	IIIB	2019-01-23	Tislelizumab	PD-1
62	56	F	Adenocarcinoma	IV	2019-02-28	Nivolumab	PD-1
63	69	M	Squamous cell carcinoma	IV	2019-06-14	Sintilimab	PD-1
64	67	M	Squamous cell carcinoma	IV	2019-05-28	Permbrolizumab	PD-1
65	50	F	Adenocarcinoma	IIIB	2019-06-24	Toripalimab	PD-1
66	60	M	Adenocarcinoma	IV	2019-03-01	Toripalimab	PD-1
67	51	F	Adenocarcinoma	IV	2019-04-09	Toripalimab	PD-1
68	73	M	Adenocarcinoma	IV	2019-05-16	Sintilimab	PD-1
69	69	M	Squamous cell carcinoma	IIIB	2019-03-04	Toripalimab	PD-1
70	65	F	Adenocarcinoma	IV	2019-05-29	Tislelizumab	PD-1
71	68	M	Squamous cell carcinoma	IV	2019-05-02	Nivolumab	PD-1
72	64	M	Non-small cell lung cancer	IV	2019-02-15	Atezolizumab	PD-L1
73	44	F	Adenocarcinoma	IV	2018-07-13	Permbrolizumab	PD-1
74	74	M	Adenocarcinoma	IV	2018-12-19	Camrelizumab	PD-1
75	71	F	Adenocarcinoma	IV	2019-04-04	Sintilimab	PD-1
76	64	M	Squamous cell carcinoma	IIIB	2019-05-03	Permbrolizumab	PD-1
77	61	M	Squamous cell carcinoma	IV	2017-11-14	Permbrolizumab	PD-1
78	37	F	Adenocarcinoma	IIIB	2018-12-19	Atezolizumab	PD-L1
79	56	M	Squamous cell carcinoma	IV	2019-05-27	Nivolumab	PD-1
80	66	M	Squamous cell carcinoma	IV	2019-07-26	Atezolizumab	PD-L1
81	70	M	Squamous cell carcinoma	IV	2019-07-24	Nivolumab	PD-1
82	62	M	Adenocarcinoma	IV	2018-12-28	Tislelizumab	PD-1
83	64	M	Non-small cell lung cancer	IV	2019-04-04	Tislelizumab	PD-1
84	57	M	Squamous cell carcinoma	IV	2019-03-01	Sintilimab	PD-1
85	55	M	Squamous cell carcinoma	IV	2019-04-02	Nivolumab	PD-1
86	66	M	Squamous cell carcinoma	IV	2019-06-11	Toripalimab	PD-1
87	82	M	Adenocarcinoma	IV	2019-05-09	Sintilimab	PD-1
88	53	M	Adenocarcinoma	IV	2019-04-04	Tislelizumab	PD-1
89	57	M	Adenocarcinoma	IIIB	2019-06-04	Atezolizumab	PD-L1
90	55	M	Adenocarcinoma	IIIB	2019-06-25	Permbrolizumab	PD-1
91	59	M	Adenocarcinoma	IV	2019-03-15	Tislelizumab	PD-1
92	67	M	Squamous cell carcinoma	IIIB	2019-04-02	Tislelizumab	PD-1
93	68	M	Non-small cell lung cancer	IV	2019-03-29	Toripalimab	PD-1
94	56	M	Adenocarcinoma	IV	2019-07-10	Sintilimab	PD-1
95	49	M	Adenocarcinoma	IV	2019-02-28	Toripalimab	PD-1
96	64	F	Adenocarcinoma	IV	2019-03-28	Sintilimab	PD-1
97	67	M	Squamous cell carcinoma	IV	2019-04-26	Toripalimab	PD-1
98	45	M	Adenocarcinoma	IV	2019-01-21	Tislelizumab	PD-1
99	64	M	Squamous cell carcinoma	IV	2019-06-27	Sintilimab	PD-1
100	71	M	Squamous cell carcinoma	IV	2019-06-21	Sintilimab	PD-1
101	56	M	Squamous cell carcinoma	IV	2018-04-02	Permbrolizumab	PD-1
102	50	M	Squamous cell carcinoma	IV	2016-04-28	Nivolumab	PD-1
103	61	M	Squamous cell carcinoma	IV	2017-09-25	Camrelizumab	PD-1
104	68	F	Adenocarcinoma	IV	2017-01-04	Atezolizumab	PD-L1
105	59	M	Adenocarcinoma	IV	2018-02-06	Tislelizumab	PD-1
106	45	F	Adenocarcinoma	IV	2016-12-22	Atezolizumab	PD-L1
107	61	M	Non-small cell lung cancer	IV	2018-12-04	Permbrolizumab	PD-1
108	64	M	Non-small cell lung cancer	IV	2018-11-06	Permbrolizumab	PD-1
109	44	M	Adenocarcinoma	IV	2016-11-08	Atezolizumab	PD-L1
110	67	M	Adenocarcinoma	IV	2018-05-25	Tislelizumab	PD-1
111	51	F	Adenocarcinoma	IV	2018-07-06	Tislelizumab	PD-1
112	65	M	Squamous cell carcinoma	IV	2018-10-12	Nivolumab	PD-1
113	55	M	Adenocarcinoma	IV	2018-08-29	Nivolumab	PD-1
114	56	M	Adenocarcinoma	IV	2018-06-27	Nivolumab	PD-1
115	60	M	Squamous cell carcinoma	IV	2018-09-17	Nivolumab	PD-1
116	60	M	Adenocarcinoma	IV	2018-10-08	Permbrolizumab	PD-1
117	64	F	Adenocarcinoma	IIIB	2018-10-09	Tislelizumab	PD-1
118	64	M	Adenocarcinoma	IV	2018-07-10	Nivolumab	PD-1
119	60	M	Non-small cell lung cancer	IV	2018-08-28	Nivolumab	PD-1
120	74	M	Squamous cell carcinoma	IV	2016-05-04	Nivolumab	PD-1
121	63	F	Adenocarcinoma	IV	2016-03-25	Nivolumab	PD-1
122	60	M	Squamous cell carcinoma	IV	2018-11-26	Permbrolizumab	PD-1
123	59	M	Adenocarcinoma	IV	2017-03-24	Atezolizumab	PD-L1
124	70	M	Adenocarcinoma	IV	2016-09-23	Nivolumab	PD-1
125	64	M	Adenocarcinoma	IV	2016-05-10	Nivolumab	PD-1
126	67	M	Squamous cell carcinoma	IV	2018-06-19	Permbrolizumab	PD-1
127	63	M	Squamous cell carcinoma	IV	2018-09-20	Nivolumab	PD-1
128	55	M	Squamous cell carcinoma	IV	2017-01-03	Atezolizumab	PD-L1
129	58	M	Adenocarcinoma	IV	2016-12-01	Atezolizumab	PD-L1
130	47	M	Adenocarcinoma	IV	2018-09-18	Sintilimab	PD-1
131	59	M	Squamous cell carcinoma	IIIB	2018-09-18	Nivolumab	PD-1
132	60	M	Non-small cell lung cancer	IV	2018-10-05	Nivolumab	PD-1
133	50	M	Adenocarcinoma	IV	2018-04-12	Tislelizumab	PD-1
134	49	F	Adenocarcinoma	IV	2018-07-10	Nivolumab	PD-1
135	64	F	Adenocarcinoma	IV	2018-09-05	Nivolumab	PD-1
136	58	M	Squamous cell carcinoma	IV	2016-04-26	Nivolumab	PD-1
137	63	M	Squamous cell carcinoma	IV	2017-04-12	Atezolizumab	PD-L1
138	74	M	Squamous cell carcinoma	IV	2016-09-19	Nivolumab	PD-1
139	73	M	Adenocarcinoma	IV	2018-10-08	Permbrolizumab	PD-1
140	62	M	Squamous cell carcinoma	IV	2017-10-25	Camrelizumab	PD-1
141	56	M	Squamous cell carcinoma	IV	2018-03-23	Nivolumab	PD-1
142	68	M	Adenocarcinoma	IV	2018-09-14	Nivolumab	PD-1
143	63	M	Squamous cell carcinoma	IV	2018-09-05	Nivolumab	PD-1
144	58	F	Adenocarcinoma	IV	2017-07-31	Camrelizumab	PD-1
145	63	M	Squamous cell carcinoma	IV	2016-06-03	Nivolumab	PD-1
146	61	M	Squamous cell carcinoma	IV	2017-10-13	Camrelizumab	PD-1
147	56	M	Adenocarcinoma	IIIB	2018-08-28	Nivolumab	PD-1
148	51	F	Adenocarcinoma	IV	2018-03-08	Camrelizumab	PD-1
149	58	M	Squamous cell carcinoma	IV	2017-11-06	Camrelizumab	PD-1
150	60	F	Adenocarcinoma	IV	2018-07-09	Nivolumab	PD-1
151	66	M	Squamous cell carcinoma	IV	2018-03-23	Tislelizumab	PD-1
152	67	M	Adenocarcinoma	IIIB	2018-02-06	Tislelizumab	PD-1
153	59	F	Adenocarcinoma	IV	2018-05-10	Tislelizumab	PD-1
154	56	M	Squamous cell carcinoma	IV	2018-08-08	Tislelizumab	PD-1
155	58	F	Adenocarcinoma	IV	2018-06-14	Tislelizumab	PD-1
156	56	F	Adenocarcinoma	IV	2018-05-09	Tislelizumab	PD-1
157	63	M	Squamous cell carcinoma	IV	2017-01-03	Atezolizumab	PD-L1
158	65	F	Adenocarcinoma	IV	2018-07-02	Tislelizumab	PD-1
159	65	F	Adenocarcinoma	IV	2018-07-17	Tislelizumab	PD-1
160	68	M	Adenocarcinoma	IV	2018-07-19	Tislelizumab	PD-1
161	61	M	Squamous cell carcinoma	IV	2018-11-06	Permbrolizumab	PD-1
162	36	F	Adenocarcinoma	IV	2017-10-25	Camrelizumab	PD-1
163	51	F	Adenocarcinoma	IIIB	2018-03-27	Tislelizumab	PD-1
164	71	F	Squamous cell carcinoma	IV	2018-06-01	Nivolumab	PD-1
165	43	M	Squamous cell carcinoma	IIIB	2017-10-20	Camrelizumab	PD-1
166	61	F	Adenocarcinoma	IV	2018-03-28	Permbrolizumab	PD-1
167	58	M	Non-small cell lung cancer	IV	2018-09-06	Nivolumab	PD-1
168	55	M	Adenocarcinoma	IV	2018-11-16	Nivolumab	PD-1
169	59	M	Squamous cell carcinoma	IV	2018-09-06	Nivolumab	PD-1
170	61	M	Adenocarcinoma	IV	2017-01-16	Permbrolizumab	PD-1
171	51	F	Adenocarcinoma	IIIB	2016-05-04	Nivolumab	PD-1
172	52	M	Adenocarcinoma	IV	2016-11-01	Atezolizumab	PD-L1
173	73	M	Squamous cell carcinoma	IV	2018-05-24	Tislelizumab	PD-1
174	50	M	Non-small cell lung cancer	IV	2018-08-29	Nivolumab	PD-1
175	63	M	Adenocarcinoma	IV	2018-07-06	Camrelizumab	PD-1
176	49	M	Adenocarcinoma	IV	2018-06-14	Tislelizumab	PD-1
177	70	F	Adenocarcinoma	IV	2016-11-11	Atezolizumab	PD-L1
178	47	M	Squamous cell carcinoma	IV	2017-11-21	Sintilimab	PD-1
179	63	M	Adenocarcinoma	IV	2016-08-24	Nivolumab	PD-1
180	62	M	Adenocarcinoma	IV	2016-11-09	Atezolizumab	PD-L1
181	65	M	Adenocarcinoma	IV	2016-11-22	Atezolizumab	PD-L1
182	66	M	Squamous cell carcinoma	IIIB	2018-06-22	Camrelizumab	PD-1
183	81	M	Non-small cell lung cancer	IV	2018-10-19	pembrolizumab	PD-1
184	57	M	Squamous cell carcinoma	IIIB	2018-05-28	Tislelizumab	PD-1
185	61	M	Adenocarcinoma	IV	2018-03-01	Tislelizumab	PD-1
186	64	M	Adenocarcinoma	IV	2018-01-26	Camrelizumab	PD-1
187	69	M	Squamous cell carcinoma	IIIB	2016-12-12	Atezolizumab	PD-L1
188	63	M	Adenocarcinoma	IV	2018-07-16	Nivolumab	PD-1
189	68	M	Squamous cell carcinoma	IV	2018-08-28	Nivolumab	PD-1
190	47	M	Adenocarcinoma	IV	2018-10-12	Permbrolizumab	PD-1
191	51	M	Squamous cell carcinoma	IV	2018-10-08	Tislelizumab	PD-1
192	63	M	Squamous cell carcinoma	IIIB	2018-08-28	Nivolumab	PD-1
193	58	M	Squamous cell carcinoma	IV	2018-07-18	Tislelizumab	PD-1
194	44	M	Adenocarcinoma	IV	2018-05-11	Tislelizumab	PD-1
195	63	M	Adenocarcinoma	IV	2018-01-18	Camrelizumab	PD-1
196	64	F	Adenocarcinoma	IV	2017-12-28	Camrelizumab	PD-1
197	63	M	Squamous cell carcinoma	IV	2018-02-27	Camrelizumab	PD-1
198	70	M	Squamous cell carcinoma	IV	2018-07-19	Nivolumab	PD-1
199	53	M	Squamous cell carcinoma	IV	2018-02-01	Camrelizumab	PD-1
200	59	M	Squamous cell carcinoma	IV	2018-06-28	Tislelizumab	PD-1
201	50	M	Squamous cell carcinoma	IV	2016-11-08	Atezolizumab	PD-L1
202	61	M	Squamous cell carcinoma	IV	2016-12-27	Atezolizumab	PD-L1
203	63	M	Squamous cell carcinoma	IV	2018-03-23	Tislelizumab	PD-1
204	67	M	Squamous cell carcinoma	IV	2017-01-20	Atezolizumab	PD-L1
205	65	M	Adenocarcinoma	IV	2018-02-01	Permbrolizumab	PD-1
206	54	M	Adenocarcinoma	IV	2018-01-03	Tislelizumab	PD-1
207	54	F	Adenocarcinoma	IV	2017-01-11	Atezolizumab	PD-L1
208	53	M	Squamous cell carcinoma	IV	2016-09-19	Nivolumab	PD-1
209	64	F	Adenocarcinoma	IV	2016-10-31	Atezolizumab	PD-L1
210	53	M	Adenocarcinoma	IV	2017-08-15	Camrelizumab	PD-1
211	63	M	Squamous cell carcinoma	IIIB	2018-03-21	Tislelizumab	PD-1
Pancreatic cancer
1	65	M	Squamous cell carcinoma	IV	2021-01-07	MV11 (Maiwei, Shanghai, China)	PD-1	2019-07-15	continued	200 mg, bid
