# Supplementary material for: Ursodeoxycholic acid breaks antitumor immunosuppression by inducing CHIP-mediated TGF-β degradation
Source: Research Square preprint supplement (doi:10.21203/rs.3.rs-845862/v1), 2021-09-10
Supplement: Supplementary file 5 [file c5a84af0ced18c93b5ea5dab.xlsx]

## Sheet: Proteins(PKA)
Checked	Protein FDR Confidence: Combined	Master	Accession	Description	Exp. q-value: Combined	Sum PEP Score	Coverage [%]	# Peptides	# PSMs	# Unique Peptides	# Protein Groups	# AAs	MW [kDa]	calc. pI	Score Mascot: Mascot	# Peptides (by Search Engine): Mascot	# Razor Peptides	Abundances (Scaled): F4: Sample	Found in Sample: [S4] F4: Sample	Modifications
FALSE	High	Master Protein	P35579	Myosin-9 OS=Homo sapiens OX=9606 GN=MYH9 PE=1 SV=4	0	1825.97	63	152	1395	126	1	1960	226.4	5.6	38293	152	48	100	High	Acetyl [K30; K82; K835; K940; K1024; K1052; K1081; K1219; K1248; K1249; K1301; K1445; K1754; K1845]; Phospho [S81; T90; S160; S169; Y400; T406; S628; S1057; T1058; S1061; S1376; S1677; T1745; S1808; S1943]; Methyl [K14; K225; K1014; K1081; K1555]
	Checked	Confidence	Annotated Sequence	Modifications	Modifications in Master Proteins	Qvality PEP	Qvality q-value	# Protein Groups	# Proteins	# PSMs	Master Protein Accessions	Positions in Master Proteins	# Missed Cleavages	Theo. MH+ [Da]	# Razor Quan Results	Abundances (Scaled): F4: Sample	Quan Info	Found in Sample: [S4] F4: Sample	Confidence (by Search Engine): Mascot	Percolator q-Value (by Search Engine): Mascot	Percolator PEP (by Search Engine): Mascot	Ions Score (by Search Engine): Mascot	Top Apex RT [min]	Sequence in Protein	Positions in Protein	Peptide Group Modifications in Protein	Quan Usage
	FALSE	High	[R].IMGIPEEEQMGLLR.[V]	1xAcetyl [N-Term]	P35579 1xAcetyl [N-Term]	8.62032e-06	0	1	1	6	P35579	P35579 [328-341]	0	1657.83	0	100		High	High	0	3.212e-06	64	52.87	R.IMGIPEEEQMGLLR.V	[328-341]	1xAcetyl [N-Term]	Used
		Checked	Confidence	Identifying Node	PSM Ambiguity	Annotated Sequence	Modifications	# Protein Groups	# Proteins	Master Protein Accessions	Protein Accessions	# Missed Cleavages	Charge	DeltaScore	DeltaCn	Rank	Search Engine Rank	m/z [Da]	MH+ [Da]	Theo. MH+ [Da]	DeltaM [ppm]	Deltam/z [Da]	Activation Type	MS Order	Isolation Interference [%]	Ion Inject Time [ms]	RT [min]	First Scan	Spectrum File	File ID	Quan Info	Ions Score	Identity Strict	Identity Relaxed	Expectation Value	Percolator q-Value	Percolator PEP	Precursor Abundance	Apex RT [min]
		FALSE	High	Mascot (A5)	Unambiguous	[R].iMGIPEEEQMGLLR.[V]	N-Term(Acetyl)	1	1	P35579	P35579	0	2	0.75	0	1	1	829.416	1657.82	1657.83	-2.64	-0.00219	HCD (High Energy Collision Dissociation)	MS2	58.7509	25	68.0988	62031	MS201900090_4_PKA.raw	F4		64	48	41	0.000275301	0	3.212e-06	2.95374e+06	68.18
		FALSE	High	Mascot (A5)	Unambiguous	[R].iMGIPEEEQMGLLR.[V]	N-Term(Acetyl)	1	1	P35579	P35579	0	2	0.7826	0	1	1	829.418	1657.83	1657.83	0.57	0.00047	HCD (High Energy Collision Dissociation)	MS2	44.6942	25	69.2243	63337	MS201900090_4_PKA.raw	F4		46	48	41	0.0170786	8.015e-05	0.0001024	1.66382e+06	68.98
		FALSE	High	Mascot (A5)	Unambiguous	[R].iMGIPEEEQMGLLR.[V]	N-Term(Acetyl)	1	1	P35579	P35579	0	2	0.7419	0	1	1	829.42	1657.83	1657.83	2.56	0.00212	HCD (High Energy Collision Dissociation)	MS2	61.3649	25	53.0999	45195	MS201900090_4_PKA.raw	F4		31	48	41	0.492547	8.015e-05	0.0004739	5177714	52.87
		FALSE	High	Mascot (A5)	Unambiguous	[R].iMGIPEEEQMGLLR.[V]	N-Term(Acetyl)	1	1	P35579	P35579	0	2	0.7931	0	1	1	829.418	1657.83	1657.83	0.25	0.00021	HCD (High Energy Collision Dissociation)	MS2		25	68.7449	62781	MS201900090_4_PKA.raw	F4		29	48	41	0.829361	0.0007363	0.01257	1.66382e+06	68.98
		FALSE	High	Mascot (A5)	Unambiguous	[R].iMGIPEEEQMGLLR.[V]	N-Term(Acetyl)	1	1	P35579	P35579	0	2	0.6667	0	1	1	829.417	1657.83	1657.83	-1.45	-0.0012	HCD (High Energy Collision Dissociation)	MS2	28.85	25	69.8798	64083	MS201900090_4_PKA.raw	F4		24	48	41	2.70576	0.002165	0.05432
		FALSE	High	Mascot (A5)	Unambiguous	[R].iMGIPEEEQMGLLR.[V]	N-Term(Acetyl)	1	1	P35579	P35579	0	2	1	0	1	1	829.422	1657.84	1657.83	4.81	0.00399	HCD (High Energy Collision Dissociation)	MS2	64.0033	25	54.9798	47297	MS201900090_4_PKA.raw	F4		8	47	40	95.8461	0.002746	0.06802
	FALSE	High	[R].IMGIPEEEQMGLLR.[V]	2xOxidation [M2; M10]		1.57241e-05	0	1	1	12	P35579	P35579 [328-341]	0	1647.81	0	100		High	High	8.015e-05	7.304e-05	49	34.23	R.IMGIPEEEQMGLLR.V	[328-341]		Used
		Checked	Confidence	Identifying Node	PSM Ambiguity	Annotated Sequence	Modifications	# Protein Groups	# Proteins	Master Protein Accessions	Protein Accessions	# Missed Cleavages	Charge	DeltaScore	DeltaCn	Rank	Search Engine Rank	m/z [Da]	MH+ [Da]	Theo. MH+ [Da]	DeltaM [ppm]	Deltam/z [Da]	Activation Type	MS Order	Isolation Interference [%]	Ion Inject Time [ms]	RT [min]	First Scan	Spectrum File	File ID	Quan Info	Ions Score	Identity Strict	Identity Relaxed	Expectation Value	Percolator q-Value	Percolator PEP	Precursor Abundance	Apex RT [min]
		FALSE	High	Mascot (A5)	Unambiguous	[R].ImGIPEEEQmGLLR.[V]	M2(Oxidation); M10(Oxidation)	1	1	P35579	P35579	0	2	0.8085	0	1	1	824.41	1647.81	1647.81	2.4	0.00197	HCD (High Energy Collision Dissociation)	MS2	24.4632	25	33.9586	23944	MS201900090_4_PKA.raw	F4		47	48	41	0.0146602	0	6.18e-06	358223968	34.23
		FALSE	High	Mascot (A5)	Unambiguous	[R].ImGIPEEEQmGLLR.[V]	M2(Oxidation); M10(Oxidation)	1	1	P35579	P35579	0	2	0.8235	0	1	1	824.405	1647.8	1647.81	-2.69	-0.00222	HCD (High Energy Collision Dissociation)	MS2		25	37.8189	28260	MS201900090_4_PKA.raw	F4		34	48	41	0.302354	8.015e-05	0.000183	2.57437e+06	37.84
		FALSE	High	Mascot (A5)	Unambiguous	[R].ImGIPEEEQmGLLR.[V]	M2(Oxidation); M10(Oxidation)	1	1	P35579	P35579	0	2	0.6875	0	1	1	824.408	1647.81	1647.81	0.81	0.00067	HCD (High Energy Collision Dissociation)	MS2	3.45577	25	38.966	29593	MS201900090_4_PKA.raw	F4		32	48	41	0.408437	8.015e-05	0.0002454
		FALSE	High	Mascot (A5)	Unambiguous	[R].ImGIPEEEQmGLLR.[V]	M2(Oxidation); M10(Oxidation)	1	1	P35579	P35579	0	2	0.8163	0	1	1	824.409	1647.81	1647.81	2.1	0.00173	HCD (High Energy Collision Dissociation)	MS2	0	0.845	34.4192	24450	MS201900090_4_PKA.raw	F4		49	48	41	0.00780128	8.015e-05	7.304e-05	358223968	34.23
		FALSE	High	Mascot (A5)	Unambiguous	[R].ImGIPEEEQmGLLR.[V]	M2(Oxidation); M10(Oxidation)	1	1	P35579	P35579	0	2	0.7907	0	1	1	824.411	1647.81	1647.81	3.73	0.00307	HCD (High Energy Collision Dissociation)	MS2	0	25	37.3691	27743	MS201900090_4_PKA.raw	F4		43	48	41	0.0360717	8.015e-05	4.738e-05	3344722	37.05
		FALSE	High	Mascot (A5)	Unambiguous	[R].ImGIPEEEQmGLLR.[V]	M2(Oxidation); M10(Oxidation)	1	1	P35579	P35579	0	2	0.7857	0	1	1	824.409	1647.81	1647.81	1.61	0.00133	HCD (High Energy Collision Dissociation)	MS2	6.41515	25	38.473	29018	MS201900090_4_PKA.raw	F4		42	48	41	0.0448276	8.015e-05	0.0002478
		FALSE	High	Mascot (A5)	Unambiguous	[R].ImGIPEEEQmGLLR.[V]	M2(Oxidation); M10(Oxidation)	1	1	P35579	P35579	0	2	0.8889	0	1	1	824.408	1647.81	1647.81	0.14	0.00012	HCD (High Energy Collision Dissociation)	MS2	36.6501	25	40.7647	31627	MS201900090_4_PKA.raw	F4		27	48	41	1.53942	0.0001341	0.0008646
		FALSE	High	Mascot (A5)	Unambiguous	[R].ImGIPEEEQmGLLR.[V]	M2(Oxidation); M10(Oxidation)	1	1	P35579	P35579	0	2	0.6923	0	1	1	824.408	1647.81	1647.81	-0.08	-7e-05	HCD (High Energy Collision Dissociation)	MS2	21.5839	25	36.9082	27238	MS201900090_4_PKA.raw	F4		26	48	41	1.73374	0.0001341	0.00127	3344722	37.05
		FALSE	High	Mascot (A5)	Unambiguous	[R].ImGIPEEEQmGLLR.[V]	M2(Oxidation); M10(Oxidation)	1	1	P35579	P35579	0	2	0.875	0	1	1	824.406	1647.81	1647.81	-1.63	-0.00135	HCD (High Energy Collision Dissociation)	MS2	30.6949	25	39.529	30228	MS201900090_4_PKA.raw	F4		16	48	41	17.6399	0.0001341	0.0008842
		FALSE	High	Mascot (A5)	Unambiguous	[R].ImGIPEEEQmGLLR.[V]	M2(Oxidation); M10(Oxidation)	1	1	P35579	P35579	0	2	1	0	1	1	824.405	1647.8	1647.81	-3.49	-0.00288	HCD (High Energy Collision Dissociation)	MS2	0	25	41.4373	32404	MS201900090_4_PKA.raw	F4		11	48	41	59.4087	0.0001341	0.002514
		FALSE	High	Mascot (A5)	Unambiguous	[R].ImGIPEEEQmGLLR.[V]	M2(Oxidation); M10(Oxidation)	1	1	P35579	P35579	0	2	0.75	0	1	1	824.411	1647.81	1647.81	4.2	0.00346	HCD (High Energy Collision Dissociation)	MS2	35.1708	25	39.7224	30447	MS201900090_4_PKA.raw	F4		36	48	41	0.16565	0.0002005	0.003082
		FALSE	High	Mascot (A5)	Unambiguous	[R].ImGIPEEEQmGLLR.[V]	M2(Oxidation); M10(Oxidation)	1	1	P35579	P35579	0	2	0.7647	0	1	1	824.408	1647.81	1647.81	0.58	0.00048	HCD (High Energy Collision Dissociation)	MS2	29.2022	25	40.2172	31020	MS201900090_4_PKA.raw	F4		17	48	41	13.7705	0.001486	0.03425
	FALSE	High	[R].IMGIPEEEQMGLLR.[V]	1xOxidation [M]		2.55168e-06	0	1	1	15	P35579	P35579 [328-341]	0	1631.81	0	100		High	High	0	1.009e-05	58	41.63	R.IMGIPEEEQMGLLR.V	[328-341]		Used
		Checked	Confidence	Identifying Node	PSM Ambiguity	Annotated Sequence	Modifications	# Protein Groups	# Proteins	Master Protein Accessions	Protein Accessions	# Missed Cleavages	Charge	DeltaScore	DeltaCn	Rank	Search Engine Rank	m/z [Da]	MH+ [Da]	Theo. MH+ [Da]	DeltaM [ppm]	Deltam/z [Da]	Activation Type	MS Order	Isolation Interference [%]	Ion Inject Time [ms]	RT [min]	First Scan	Spectrum File	File ID	Quan Info	Ions Score	Identity Strict	Identity Relaxed	Expectation Value	Percolator q-Value	Percolator PEP	Precursor Abundance	Apex RT [min]
		FALSE	High	Mascot (A5)	Unambiguous	[R].ImGIPEEEQMGLLR.[V]	M2(Oxidation)	1	1	P35579	P35579	0	2	0.6	0	1	1	816.41	1631.81	1631.81	-0.67	-0.00055	HCD (High Energy Collision Dissociation)	MS2	10.7824	25	46.1195	37442	MS201900090_4_PKA.raw	F4		55	48	41	0.00215425	0	8.96e-06	3.77618e+06	45.2
		FALSE	High	Mascot (A5)	Unambiguous	[R].ImGIPEEEQMGLLR.[V]	M2(Oxidation)	1	1	P35579	P35579	0	2	0.8448	0	1	1	816.409	1631.81	1631.81	-1.76	-0.00144	HCD (High Energy Collision Dissociation)	MS2	0	10.097	41.9747	33020	MS201900090_4_PKA.raw	F4		58	48	41	0.00108477	0	1.009e-05	410053632	41.63
		FALSE	High	Mascot (A5)	Unambiguous	[R].ImGIPEEEQMGLLR.[V]	M2(Oxidation)	1	1	P35579	P35579	0	2	0.6562	0	1	1	816.408	1631.81	1631.81	-2.17	-0.00177	HCD (High Energy Collision Dissociation)	MS2	19.3972	25	47.6248	39145	MS201900090_4_PKA.raw	F4		32	48	41	0.436331	0	1.436e-05
		FALSE	High	Mascot (A5)	Unambiguous	[R].ImGIPEEEQMGLLR.[V]	M2(Oxidation)	1	1	P35579	P35579	0	2	0.5714	0	1	1	816.41	1631.81	1631.81	-0.4	-0.00032	HCD (High Energy Collision Dissociation)	MS2	28.6611	22.307	44.552	35880	MS201900090_4_PKA.raw	F4		35	48	41	0.211632	0	2.383e-05	9658768	44
		FALSE	High	Mascot (A5)	Unambiguous	[R].ImGIPEEEQMGLLR.[V]	M2(Oxidation)	1	1	P35579	P35579	0	2	0.5333	0	1	1	816.411	1631.81	1631.81	0.51	0.00042	HCD (High Energy Collision Dissociation)	MS2	7.52476	25	45.6033	36864	MS201900090_4_PKA.raw	F4		45	48	41	0.0202195	0	1.677e-06	3.77618e+06	45.2
		FALSE	High	Mascot (A5)	Unambiguous	[R].IMGIPEEEQmGLLR.[V]	M10(Oxidation)	1	1	P35579	P35579	0	2	0.9636	0	1	1	816.411	1631.82	1631.81	1.26	0.00102	HCD (High Energy Collision Dissociation)	MS2	58.6431	25	41.0405	31956	MS201900090_4_PKA.raw	F4		55	48	41	0.00201814	0	8.605e-07	253655056	41.36
		FALSE	High	Mascot (A5)	Unambiguous	[R].ImGIPEEEQMGLLR.[V]	M2(Oxidation)	1	1	P35579	P35579	0	2	0.6829	0	1	1	816.411	1631.81	1631.81	0.57	0.00046	HCD (High Energy Collision Dissociation)	MS2	20.7861	25	47.1575	38636	MS201900090_4_PKA.raw	F4		41	48	41	0.0525827	0	3.469e-06
		FALSE	High	Mascot (A5)	Unambiguous	[R].ImGIPEEEQMGLLR.[V]	M2(Oxidation)	1	1	P35579	P35579	0	2	0.8	0	1	1	816.408	1631.81	1631.81	-2.48	-0.00202	HCD (High Energy Collision Dissociation)	MS2	47.2389	25	42.5572	33634	MS201900090_4_PKA.raw	F4	Not Reliable	5	48	41	189.08	8.015e-05	0.0004188
		FALSE	High	Mascot (A5)	Unambiguous	[R].ImGIPEEEQMGLLR.[V]	M2(Oxidation)	1	1	P35579	P35579	0	2	0.9333	0	1	1	816.41	1631.81	1631.81	-0.69	-0.00056	HCD (High Energy Collision Dissociation)	MS2	58.8277	8.322	44.0737	35373	MS201900090_4_PKA.raw	F4		15	48	41	19.3789	8.015e-05	0.000205	9658768	44
		FALSE	High	Mascot (A5)	Unambiguous	[R].ImGIPEEEQMGLLR.[V]	M2(Oxidation)	1	1	P35579	P35579	0	2	0.6471	0	1	1	816.409	1631.81	1631.81	-0.88	-0.00072	HCD (High Energy Collision Dissociation)	MS2	34.3611	25	46.5951	37990	MS201900090_4_PKA.raw	F4		34	48	41	0.292705	8.015e-05	0.0001267
		FALSE	High	Mascot (A5)	Unambiguous	[R].ImGIPEEEQMGLLR.[V]	M2(Oxidation)	1	1	P35579	P35579	0	2	0.7812	0	1	1	816.409	1631.81	1631.81	-0.95	-0.00078	HCD (High Energy Collision Dissociation)	MS2		25	48.08	39616	MS201900090_4_PKA.raw	F4		32	48	41	0.441223	8.015e-05	0.0007379
		FALSE	High	Mascot (A5)	Unambiguous	[R].ImGIPEEEQMGLLR.[V]	M2(Oxidation)	1	1	P35579	P35579	0	2	0.8	0	1	1	816.409	1631.81	1631.81	-1.87	-0.00153	HCD (High Energy Collision Dissociation)	MS2	24.6973	25	42.4229	33485	MS201900090_4_PKA.raw	F4	Not Reliable	35	48	41	0.222583	8.015e-05	0.0003446
		FALSE	High	Mascot (A5)	Unambiguous	[R].ImGIPEEEQMGLLR.[V]	M2(Oxidation)	1	1	P35579	P35579	0	2	0.8182	0	1	1	816.411	1631.81	1631.81	0.51	0.00042	HCD (High Energy Collision Dissociation)	MS2		25	48.7649	40395	MS201900090_4_PKA.raw	F4		22	48	41	3.91536	8.015e-05	0.0002031
		FALSE	High	Mascot (A5)	Unambiguous	[R].ImGIPEEEQMGLLR.[V]	M2(Oxidation)	1	1	P35579	P35579	0	2	0.3889	0	1	1	816.411	1631.82	1631.81	1.43	0.00116	HCD (High Energy Collision Dissociation)	MS2	0	1.832	41.5051	32489	MS201900090_4_PKA.raw	F4		36	48	41	0.161569	8.015e-05	6.403e-05	410053632	41.63
		FALSE	High	Mascot (A5)	Unambiguous	[R].ImGIPEEEQMGLLR.[V]	M2(Oxidation)	1	1	P35579	P35579	0	2	0.9167	0	1	1	816.408	1631.81	1631.81	-2.29	-0.00187	HCD (High Energy Collision Dissociation)	MS2	18.9299	25	49.5015	41244	MS201900090_4_PKA.raw	F4		12	48	41	38.1409	0.005177	0.1192
	FALSE	High	[R].IMGIPEEEQMGLLR.[V]			6.86108e-06	0	1	1	7	P35579	P35579 [328-341]	0	1615.82	0	100		High	High	0	5.023e-06	86	49.11	R.IMGIPEEEQMGLLR.V	[328-341]		Used
		Checked	Confidence	Identifying Node	PSM Ambiguity	Annotated Sequence	Modifications	# Protein Groups	# Proteins	Master Protein Accessions	Protein Accessions	# Missed Cleavages	Charge	DeltaScore	DeltaCn	Rank	Search Engine Rank	m/z [Da]	MH+ [Da]	Theo. MH+ [Da]	DeltaM [ppm]	Deltam/z [Da]	Activation Type	MS Order	Isolation Interference [%]	Ion Inject Time [ms]	RT [min]	First Scan	Spectrum File	File ID	Quan Info	Ions Score	Identity Strict	Identity Relaxed	Expectation Value	Percolator q-Value	Percolator PEP	Precursor Abundance	Apex RT [min]
		FALSE	High	Mascot (A5)	Unambiguous	[R].IMGIPEEEQMGLLR.[V]		1	1	P35579	P35579	0	2	0.9535	0	1	1	808.413	1615.82	1615.82	0.79	0.00063	HCD (High Energy Collision Dissociation)	MS2	10.0868	0.937	49.0538	40722	MS201900090_4_PKA.raw	F4		86	47	40	1.70005e-06	0	5.023e-06	262872672	49.11
		FALSE	High	Mascot (A5)	Unambiguous	[R].IMGIPEEEQMGLLR.[V]		1	1	P35579	P35579	0	2	0.9231	0	1	1	808.412	1615.82	1615.82	-0.69	-0.00056	HCD (High Energy Collision Dissociation)	MS2	30.5672	18.206	49.5657	41308	MS201900090_4_PKA.raw	F4		52	47	40	0.00357774	0	2.513e-06	262872672	49.11
		FALSE	High	Mascot (A5)	Unambiguous	[R].IMGIPEEEQMGLLR.[V]		1	1	P35579	P35579	0	2	1	0	1	1	808.405	1615.8	1615.82	-9.45	-0.00764	HCD (High Energy Collision Dissociation)	MS2	70.0966	25	50.9641	42873	MS201900090_4_PKA.raw	F4		18	48	41	10.4075	8.015e-05	0.0003838
		FALSE	High	Mascot (A5)	Unambiguous	[R].IMGIPEEEQMGLLR.[V]		1	1	P35579	P35579	0	2	0.9048	0	1	1	808.412	1615.82	1615.82	-0.84	-0.00068	HCD (High Energy Collision Dissociation)	MS2	32.5215	25	52.5976	44627	MS201900090_4_PKA.raw	F4	Not Reliable	21	47	40	5.35486	8.015e-05	0.000555
		FALSE	High	Mascot (A5)	Unambiguous	[R].IMGIPEEEQMGLLR.[V]		1	1	P35579	P35579	0	2	0.875	0	1	1	808.414	1615.82	1615.82	1.53	0.00123	HCD (High Energy Collision Dissociation)	MS2	30.1018	25	50.0381	41823	MS201900090_4_PKA.raw	F4		40	47	40	0.0613661	8.015e-05	0.0001896	262872672	49.11
		FALSE	High	Mascot (A5)	Unambiguous	[R].IMGIPEEEQMGLLR.[V]		1	1	P35579	P35579	0	2	1	0	1	1	808.411	1615.82	1615.82	-1.68	-0.00136	HCD (High Energy Collision Dissociation)	MS2	44.3641	25	54.9775	47294	MS201900090_4_PKA.raw	F4		2	48	41	426.683	0.008626	0.1852
		FALSE	High	Mascot (A5)	Unambiguous	[R].IMGIPEEEQMGLLR.[V]		1	1	P35579	P35579	0	2	1	0	1	1	808.406	1615.8	1615.82	-8.36	-0.00675	HCD (High Energy Collision Dissociation)	MS2	20.6473	25	53.6999	45877	MS201900090_4_PKA.raw	F4	Not Reliable	5	48	41	209.782	0.009027	0.1977
	FALSE	High	[K].LQQLFNHTMFILEQEEYQR.[E]	1xOxidation [M9]		3.57336e-08	0	3	3	4	P35580; P35749; P35579	P35580 [483-501]; P35749 [483-501]; P35579 [476-494]	0	2483.2	0	100	Shared	High	High	0	8.512e-09	76	43.76	K.LQQLFNHTMFILEQEEYQR.E	[476-494]		Used
		Checked	Confidence	Identifying Node	PSM Ambiguity	Annotated Sequence	Modifications	# Protein Groups	# Proteins	Master Protein Accessions	Protein Accessions	# Missed Cleavages	Charge	DeltaScore	DeltaCn	Rank	Search Engine Rank	m/z [Da]	MH+ [Da]	Theo. MH+ [Da]	DeltaM [ppm]	Deltam/z [Da]	Activation Type	MS Order	Isolation Interference [%]	Ion Inject Time [ms]	RT [min]	First Scan	Spectrum File	File ID	Quan Info	Ions Score	Identity Strict	Identity Relaxed	Expectation Value	Percolator q-Value	Percolator PEP	Precursor Abundance	Apex RT [min]
		FALSE	High	Mascot (A5)	Unambiguous	[K].LQQLFNHTmFILEQEEYQR.[E]	M9(Oxidation)	3	3	P35580; P35749; P35579	P35580; P35749; P35579	0	3	0.9605	0	1	1	828.406	2483.2	2483.2	0.58	0.00048	HCD (High Energy Collision Dissociation)	MS2	27.4747	25	43.6542	34904	MS201900090_4_PKA.raw	F4		76	50	43	3.19849e-05	0	8.512e-09	8603140	43.76
		FALSE	High	Mascot (A5)	Unambiguous	[K].LQQLFNHTmFILEQEEYQR.[E]	M9(Oxidation)	3	3	P35580; P35749; P35579	P35580; P35749; P35579	0	3	0.9545	0	1	1	828.408	2483.21	2483.2	3.07	0.00254	HCD (High Energy Collision Dissociation)	MS2	27.9344	25	44.118	35419	MS201900090_4_PKA.raw	F4		44	50	43	0.0471347	8.015e-05	0.000103	8603140	43.76
		FALSE	High	Mascot (A5)	Unambiguous	[K].LQQLFNHTmFILEQEEYQR.[E]	M9(Oxidation)	3	3	P35580; P35749; P35579	P35580; P35749; P35579	0	3	1	0	1	1	828.392	2483.16	2483.2	-16.18	-0.01339	HCD (High Energy Collision Dissociation)	MS2	23.9765	25	47.313	38806	MS201900090_4_PKA.raw	F4		29	51	44	1.88256	0.0001341	0.0027
		FALSE	High	Mascot (A5)	Unambiguous	[K].LQQLFNHTmFILEQEEYQR.[E]	M9(Oxidation)	3	3	P35580; P35749; P35579	P35580; P35749; P35579	0	2	1	0	1	1	1242.1	2483.2	2483.2	-0.16	-0.0002	HCD (High Energy Collision Dissociation)	MS2	45.1418	25	47.5056	39027	MS201900090_4_PKA.raw	F4		32	50	43	0.876574	0.0007363	0.01256
	FALSE	High	[K].LQQLFNHTMFILEQEEYQR.[E]			1.10185e-07	0	3	3	3	P35580; P35749; P35579	P35580 [483-501]; P35749 [483-501]; P35579 [476-494]	0	2467.21	0	100	Shared	High	High	0	2.109e-07	102	51.92	K.LQQLFNHTMFILEQEEYQR.E	[476-494]		Used
		Checked	Confidence	Identifying Node	PSM Ambiguity	Annotated Sequence	Modifications	# Protein Groups	# Proteins	Master Protein Accessions	Protein Accessions	# Missed Cleavages	Charge	DeltaScore	DeltaCn	Rank	Search Engine Rank	m/z [Da]	MH+ [Da]	Theo. MH+ [Da]	DeltaM [ppm]	Deltam/z [Da]	Activation Type	MS Order	Isolation Interference [%]	Ion Inject Time [ms]	RT [min]	First Scan	Spectrum File	File ID	Quan Info	Ions Score	Identity Strict	Identity Relaxed	Expectation Value	Percolator q-Value	Percolator PEP	Precursor Abundance	Apex RT [min]
		FALSE	High	Mascot (A5)	Unambiguous	[K].LQQLFNHTMFILEQEEYQR.[E]		3	3	P35580; P35749; P35579	P35580; P35749; P35579	0	3	0.9848	0	1	1	823.072	2467.2	2467.21	-2.62	-0.00216	HCD (High Energy Collision Dissociation)	MS2	66.9451	25	51.8964	43872	MS201900090_4_PKA.raw	F4		66	50	43	0.000291619	0	2.889e-08	1.47952e+06	51.92
		FALSE	High	Mascot (A5)	Unambiguous	[K].LQQLFNHTMFILEQEEYQR.[E]		3	3	P35580; P35749; P35579	P35580; P35749; P35579	0	3	0.9706	0	1	1	823.074	2467.21	2467.21	-0.17	-0.00014	HCD (High Energy Collision Dissociation)	MS2	0	25	51.9463	43929	MS201900090_4_PKA.raw	F4		102	50	43	7.09884e-08	0	2.109e-07	1.47952e+06	51.92
		FALSE	High	Mascot (A5)	Unambiguous	[K].LQQLFNHTMFILEQEEYQR.[E]		3	3	P35580; P35749; P35579	P35580; P35749; P35579	0	3	0.8571	0	1	1	823.089	2467.25	2467.21	18.17	0.01494	HCD (High Energy Collision Dissociation)	MS2	66.0509	25	52.1166	44106	MS201900090_4_PKA.raw	F4		7	49	42	177.137	0.001768	0.04664
	FALSE	High	[R].LQQELDDLLVDLDHQR.[Q]	1xAcetyl [N-Term]	P35579 1xAcetyl [N-Term]	8.65451e-10	0	1	1	5	P35579	P35579 [1418-1433]	0	1992	0	100		High	High	0	1.527e-10	100	70.59	R.LQQELDDLLVDLDHQR.Q	[1418-1433]	1xAcetyl [N-Term]	Used
		Checked	Confidence	Identifying Node	PSM Ambiguity	Annotated Sequence	Modifications	# Protein Groups	# Proteins	Master Protein Accessions	Protein Accessions	# Missed Cleavages	Charge	DeltaScore	DeltaCn	Rank	Search Engine Rank	m/z [Da]	MH+ [Da]	Theo. MH+ [Da]	DeltaM [ppm]	Deltam/z [Da]	Activation Type	MS Order	Isolation Interference [%]	Ion Inject Time [ms]	RT [min]	First Scan	Spectrum File	File ID	Quan Info	Ions Score	Identity Strict	Identity Relaxed	Expectation Value	Percolator q-Value	Percolator PEP	Precursor Abundance	Apex RT [min]
		FALSE	High	Mascot (A5)	Unambiguous	[R].lQQELDDLLVDLDHQR.[Q]	N-Term(Acetyl)	1	1	P35579	P35579	0	2	0.8375	0	1	1	996.491	1991.97	1992	-14.77	-0.01471	HCD (High Energy Collision Dissociation)	MS2	5.01353	25	68.2705	62228	MS201900090_4_PKA.raw	F4		80	49	42	9.0124e-06	0	1.459e-07	2.00986e+06	68.06
		FALSE	High	Mascot (A5)	Unambiguous	[R].lQQELDDLLVDLDHQR.[Q]	N-Term(Acetyl)	1	1	P35579	P35579	0	2	0.8454	0	1	1	996.505	1992	1992	-0.49	-0.00049	HCD (High Energy Collision Dissociation)	MS2	0	25	68.4036	62383	MS201900090_4_PKA.raw	F4		97	48	41	1.40025e-07	0	4.221e-10
		FALSE	High	Mascot (A5)	Unambiguous	[R].lQQELDDLLVDLDHQR.[Q]	N-Term(Acetyl)	1	1	P35579	P35579	0	2	0.8028	0	1	1	996.505	1992	1992	0	0	HCD (High Energy Collision Dissociation)	MS2	8.37606	25	68.3207	62290	MS201900090_4_PKA.raw	F4		71	48	41	6.04125e-05	0	1.363e-09
		FALSE	High	Mascot (A5)	Unambiguous	[R].lQQELDDLLVDLDHQR.[Q]	N-Term(Acetyl)	1	1	P35579	P35579	0	2	0.87	0	1	1	996.505	1992	1992	0.19	0.00019	HCD (High Energy Collision Dissociation)	MS2	29.1883	25	70.5862	64905	MS201900090_4_PKA.raw	F4		100	48	41	7.47861e-08	0	1.527e-10	2.02305e+06	70.59
		FALSE	High	Mascot (A5)	Unambiguous	[R].lQQELDDLLVDLDHQR.[Q]	N-Term(Acetyl)	1	1	P35579	P35579	0	2	1	0	1	1	996.511	1992.02	1992	6.17	0.00615	HCD (High Energy Collision Dissociation)	MS2	18.0971	25	67.7301	61608	MS201900090_4_PKA.raw	F4		67	48	41	0.000136615	0	2.968e-06	131006	67.62
	FALSE	High	[R].LQQELDDLLVDLDHQR.[Q]			4.39697e-10	0	1	1	28	P35579	P35579 [1418-1433]	0	1949.99	0	100		High	High	0	7.193e-08	87	53.77	R.LQQELDDLLVDLDHQR.Q	[1418-1433]		Used
		Checked	Confidence	Identifying Node	PSM Ambiguity	Annotated Sequence	Modifications	# Protein Groups	# Proteins	Master Protein Accessions	Protein Accessions	# Missed Cleavages	Charge	DeltaScore	DeltaCn	Rank	Search Engine Rank	m/z [Da]	MH+ [Da]	Theo. MH+ [Da]	DeltaM [ppm]	Deltam/z [Da]	Activation Type	MS Order	Isolation Interference [%]	Ion Inject Time [ms]	RT [min]	First Scan	Spectrum File	File ID	Quan Info	Ions Score	Identity Strict	Identity Relaxed	Expectation Value	Percolator q-Value	Percolator PEP	Precursor Abundance	Apex RT [min]
		FALSE	High	Mascot (A5)	Unambiguous	[R].LQQELDDLLVDLDHQR.[Q]		1	1	P35579	P35579	0	3	0.9216	0	1	1	650.67	1950	1949.99	1.22	0.00079	HCD (High Energy Collision Dissociation)	MS2	10.255	25	58.3342	50781	MS201900090_4_PKA.raw	F4		51	48	41	0.00589044	0	4.34e-08	889767	57.97
		FALSE	High	Mascot (A5)	Unambiguous	[R].LQQELDDLLVDLDHQR.[Q]		1	1	P35579	P35579	0	3	1	0	1	1	650.675	1950.01	1949.99	9.54	0.0062	HCD (High Energy Collision Dissociation)	MS2	86.5873	22.018	55.8618	48253	MS201900090_4_PKA.raw	F4		20	47	40	6.02412	0	1.572e-05	2697817	55.33
		FALSE	High	Mascot (A5)	Unambiguous	[R].LQQELDDLLVDLDHQR.[Q]		1	1	P35579	P35579	0	3	0.9804	0	1	1	650.67	1949.99	1949.99	1.16	0.00076	HCD (High Energy Collision Dissociation)	MS2	0	25	59.18	51688	MS201900090_4_PKA.raw	F4		51	48	41	0.00582258	0	1.029e-06
		FALSE	High	Mascot (A5)	Unambiguous	[R].LQQELDDLLVDLDHQR.[Q]		1	1	P35579	P35579	0	2	0.9545	0	1	1	975.493	1949.98	1949.99	-6.73	-0.00657	HCD (High Energy Collision Dissociation)	MS2	40.4912	25	58.9411	51457	MS201900090_4_PKA.raw	F4		66	48	41	0.000167645	0	3.163e-07
		FALSE	High	Mascot (A5)	Unambiguous	[R].LQQELDDLLVDLDHQR.[Q]		1	1	P35579	P35579	0	2	1	0	1	1	975.498	1949.99	1949.99	-2.2	-0.00214	HCD (High Energy Collision Dissociation)	MS2	36.4096	25	56.6654	48952	MS201900090_4_PKA.raw	F4		51	48	41	0.00543381	0	4.532e-07
		FALSE	High	Mascot (A5)	Unambiguous	[R].LQQELDDLLVDLDHQR.[Q]		1	1	P35579	P35579	0	3	0.9014	0	1	1	650.669	1949.99	1949.99	-0.02	-1e-05	HCD (High Energy Collision Dissociation)	MS2	16.4711	25	48.9661	40625	MS201900090_4_PKA.raw	F4		71	48	41	5.25317e-05	0	3.814e-09	19681774	49.15
		FALSE	High	Mascot (A5)	Unambiguous	[R].LQQELDDLLVDLDHQR.[Q]		1	1	P35579	P35579	0	3	0.8704	0	1	1	650.669	1949.99	1949.99	0.05	3e-05	HCD (High Energy Collision Dissociation)	MS2	9.08615	25	54.9838	47302	MS201900090_4_PKA.raw	F4		54	48	41	0.00271731	0	1.044e-09	2697817	55.33
		FALSE	High	Mascot (A5)	Unambiguous	[R].LQQELDDLLVDLDHQR.[Q]		1	1	P35579	P35579	0	3	0.9107	0	1	1	650.669	1949.99	1949.99	0.13	9e-05	HCD (High Energy Collision Dissociation)	MS2	18.1664	25	57.3122	49662	MS201900090_4_PKA.raw	F4		56	48	41	0.00174211	0	1.518e-06
		FALSE	High	Mascot (A5)	Unambiguous	[R].LQQELDDLLVDLDHQR.[Q]		1	1	P35579	P35579	0	3	0.9176	0	1	1	650.669	1949.99	1949.99	0.23	0.00015	HCD (High Energy Collision Dissociation)	MS2	3.46274	25	54.5124	46780	MS201900090_4_PKA.raw	F4		85	48	41	2.06714e-06	0	7.311e-11	316642592	53.77
		FALSE	High	Mascot (A5)	Unambiguous	[R].LQQELDDLLVDLDHQR.[Q]		1	1	P35579	P35579	0	3	0.908	0	1	1	650.669	1949.99	1949.99	0.4	0.00026	HCD (High Energy Collision Dissociation)	MS2	24.7969	25	53.4898	45636	MS201900090_4_PKA.raw	F4		87	48	41	1.46006e-06	0	5.278e-10	316642592	53.77
		FALSE	High	Mascot (A5)	Unambiguous	[R].LQQELDDLLVDLDHQR.[Q]		1	1	P35579	P35579	0	3	0.8649	0	1	1	650.67	1949.99	1949.99	1.07	0.00069	HCD (High Energy Collision Dissociation)	MS2	0.984214	1.961	53.9724	46182	MS201900090_4_PKA.raw	F4		74	48	41	2.72936e-05	0	5.09e-08	316642592	53.77
		FALSE	High	Mascot (A5)	Unambiguous	[R].LQQELDDLLVDLDHQR.[Q]		1	1	P35579	P35579	0	3	1	0	1	1	650.669	1949.99	1949.99	-0.08	-5e-05	HCD (High Energy Collision Dissociation)	MS2	31.1938	25	43.7201	34970	MS201900090_4_PKA.raw	F4		52	48	41	0.00451088	0	3.516e-09	4.35863e+06	43.8
		FALSE	High	Mascot (A5)	Unambiguous	[R].LQQELDDLLVDLDHQR.[Q]		1	1	P35579	P35579	0	2	0.977	0	1	1	975.499	1949.99	1949.99	-1.42	-0.00138	HCD (High Energy Collision Dissociation)	MS2	68.5128	25	43.7325	34986	MS201900090_4_PKA.raw	F4		87	48	41	1.39527e-06	0	7.193e-08	2337797	43.79
		FALSE	High	Mascot (A5)	Unambiguous	[R].LQQELDDLLVDLDHQR.[Q]		1	1	P35579	P35579	0	3	0.85	0	1	1	650.668	1949.99	1949.99	-1.35	-0.00088	HCD (High Energy Collision Dissociation)	MS2	5.62458	25	55.4407	47773	MS201900090_4_PKA.raw	F4		60	48	41	0.000655381	0	9.685e-10	2697817	55.33
		FALSE	High	Mascot (A5)	Unambiguous	[R].LQQELDDLLVDLDHQR.[Q]		1	1	P35579	P35579	0	3	0.9091	0	1	1	650.668	1949.99	1949.99	-1.23	-0.0008	HCD (High Energy Collision Dissociation)	MS2	0	25	59.7084	52299	MS201900090_4_PKA.raw	F4		66	48	41	0.000169012	0	7.802e-08
		FALSE	High	Mascot (A5)	Unambiguous	[R].LQQELDDLLVDLDHQR.[Q]		1	1	P35579	P35579	0	3	1	0	1	1	650.668	1949.99	1949.99	-0.9	-0.00058	HCD (High Energy Collision Dissociation)	MS2	36.1947	25	57.1662	49498	MS201900090_4_PKA.raw	F4		47	48	41	0.0147045	0	2.041e-08
		FALSE	High	Mascot (A5)	Unambiguous	[R].LQQELDDLLVDLDHQR.[Q]		1	1	P35579	P35579	0	3	1	0	1	1	650.668	1949.99	1949.99	-1.57	-0.00102	HCD (High Energy Collision Dissociation)	MS2	43.8203	25	61.1182	53933	MS201900090_4_PKA.raw	F4		8	48	41	97.4041	8.015e-05	0.0005902
		FALSE	High	Mascot (A5)	Unambiguous	[R].LQQELDDLLVDLDHQR.[Q]		1	1	P35579	P35579	0	3	1	0	1	1	650.669	1949.99	1949.99	0.02	1e-05	HCD (High Energy Collision Dissociation)	MS2	3.25778	25	49.4668	41199	MS201900090_4_PKA.raw	F4		39	48	41	0.0834442	8.015e-05	3.62e-05	19681774	49.15
		FALSE	High	Mascot (A5)	Unambiguous	[R].LQQELDDLLVDLDHQR.[Q]		1	1	P35579	P35579	0	3	1	0	1	1	650.668	1949.99	1949.99	-1.76	-0.00114	HCD (High Energy Collision Dissociation)	MS2	12.0973	25	62.6144	55639	MS201900090_4_PKA.raw	F4	Not Reliable	25	48	41	2.14361	0.0001341	0.002428
		FALSE	High	Mascot (A5)	Unambiguous	[R].LQQELDDLLVDLDHQR.[Q]		1	1	P35579	P35579	0	3	0.875	0	1	1	650.67	1950	1949.99	1.43	0.00093	HCD (High Energy Collision Dissociation)	MS2	42.7049	25	66.2742	59909	MS201900090_4_PKA.raw	F4		8	48	41	115.874	0.0002495	0.005272	179437	65.38
		FALSE	High	Mascot (A5)	Unambiguous	[R].LQQELDDLLVDLDHQR.[Q]		1	1	P35579	P35579	0	3	1	0	1	1	650.668	1949.99	1949.99	-1.04	-0.00068	HCD (High Energy Collision Dissociation)	MS2	40.3189	25	63.6057	56805	MS201900090_4_PKA.raw	F4		15	48	41	20.3454	0.0002495	0.004213
		FALSE	High	Mascot (A5)	Unambiguous	[R].LQQELDDLLVDLDHQR.[Q]		1	1	P35579	P35579	0	3	1	0	1	1	650.667	1949.99	1949.99	-2.52	-0.00164	HCD (High Energy Collision Dissociation)	MS2	49.4945	25	57.8321	50215	MS201900090_4_PKA.raw	F4		6	48	41	179.088	0.0004105	0.008069	889767	57.97
		FALSE	High	Mascot (A5)	Unambiguous	[R].LQQELDDLLVDLDHQR.[Q]		1	1	P35579	P35579	0	3	1	0	1	1	650.669	1949.99	1949.99	-0.03	-2e-05	HCD (High Energy Collision Dissociation)	MS2	47.1886	25	65.5277	59030	MS201900090_4_PKA.raw	F4		16	48	41	18.6819	0.0004105	0.007957	179437	65.38
		FALSE	High	Mascot (A5)	Unambiguous	[R].LQQELDDLLVDLDHQR.[Q]		1	1	P35579	P35579	0	3	1	0	1	1	650.668	1949.99	1949.99	-2.02	-0.00132	HCD (High Energy Collision Dissociation)	MS2	79.7294	25	63.2227	56352	MS201900090_4_PKA.raw	F4		9	48	41	82.2998	0.0004105	0.009725	463235	61.98
		FALSE	High	Mascot (A5)	Unambiguous	[R].LQQELDDLLVDLDHQR.[Q]		1	1	P35579	P35579	0	3	1	0	1	1	650.67	1950	1949.99	1.65	0.00107	HCD (High Energy Collision Dissociation)	MS2	45.8595	25	55.6346	47990	MS201900090_4_PKA.raw	F4		4	48	41	243.628	0.0004105	0.008251	2697817	55.33
		FALSE	High	Mascot (A5)	Unambiguous	[R].LQQELDDLLVDLDHQR.[Q]		1	1	P35579	P35579	0	3	0.9091	0	1	1	650.669	1949.99	1949.99	0.06	4e-05	HCD (High Energy Collision Dissociation)	MS2	63.7413	25	63.8162	57056	MS201900090_4_PKA.raw	F4		11	48	41	58.6327	0.0007363	0.01404
		FALSE	High	Mascot (A5)	Unambiguous	[R].LQQELDDLLVDLDHQR.[Q]		1	1	P35579	P35579	0	3	0.4286	0	1	1	650.668	1949.99	1949.99	-1.04	-0.00068	HCD (High Energy Collision Dissociation)	MS2	56.3099	25	67.6972	61569	MS201900090_4_PKA.raw	F4		7	48	41	124.298	0.001443	0.02867
		FALSE	High	Mascot (A5)	Unambiguous	[R].LQQELDDLLVDLDHQR.[Q]		1	1	P35579	P35579	0	3	1	0	1	1	650.669	1949.99	1949.99	0.65	0.00042	HCD (High Energy Collision Dissociation)	MS2	60.884	25	64.4052	57747	MS201900090_4_PKA.raw	F4		6	48	41	158.165	0.002838	0.07316	258137	64.65
	FALSE	High	[K].IRELESQISELQEDLESER.[A]			6.48151e-10	0	1	1	13	P35579	P35579 [1106-1124]	1	2303.14	0	100		High	High	0	1.118e-10	79	48.7	K.IRELESQISELQEDLESER.A	[1106-1124]		Used
		Checked	Confidence	Identifying Node	PSM Ambiguity	Annotated Sequence	Modifications	# Protein Groups	# Proteins	Master Protein Accessions	Protein Accessions	# Missed Cleavages	Charge	DeltaScore	DeltaCn	Rank	Search Engine Rank	m/z [Da]	MH+ [Da]	Theo. MH+ [Da]	DeltaM [ppm]	Deltam/z [Da]	Activation Type	MS Order	Isolation Interference [%]	Ion Inject Time [ms]	RT [min]	First Scan	Spectrum File	File ID	Quan Info	Ions Score	Identity Strict	Identity Relaxed	Expectation Value	Percolator q-Value	Percolator PEP	Precursor Abundance	Apex RT [min]
		FALSE	High	Mascot (A5)	Unambiguous	[K].IRELESQISELQEDLESER.[A]		1	1	P35579	P35579	1	3	1	0	1	1	768.384	2303.14	2303.14	0.51	0.00039	HCD (High Energy Collision Dissociation)	MS2	0.229739	5.27	48.9545	40613	MS201900090_4_PKA.raw	F4		76	49	42	2.34285e-05	0	9.796e-09	94423704	48.7
		FALSE	High	Mascot (A5)	Unambiguous	[K].IRELESQISELQEDLESER.[A]		1	1	P35579	P35579	1	3	1	0	1	1	768.383	2303.14	2303.14	-0.1	-8e-05	HCD (High Energy Collision Dissociation)	MS2	37.279	25	49.319	41030	MS201900090_4_PKA.raw	F4		47	49	42	0.022121	0	6.678e-07	94423704	48.7
		FALSE	High	Mascot (A5)	Unambiguous	[K].IRELESQISELQEDLESER.[A]		1	1	P35579	P35579	1	3	1	0	1	1	768.383	2303.13	2303.14	-0.96	-0.00074	HCD (High Energy Collision Dissociation)	MS2	10.9484	25	49.5679	41311	MS201900090_4_PKA.raw	F4		60	50	43	0.000994556	0	1.3e-07	94423704	48.7
		FALSE	High	Mascot (A5)	Unambiguous	[K].IRELESQISELQEDLESER.[A]		1	1	P35579	P35579	1	3	1	0	1	1	768.383	2303.13	2303.14	-0.96	-0.00073	HCD (High Energy Collision Dissociation)	MS2	35.5586	25	51.0661	42985	MS201900090_4_PKA.raw	F4		59	50	43	0.00121515	0	1.726e-05
		FALSE	High	Mascot (A5)	Unambiguous	[K].IRELESQISELQEDLESER.[A]		1	1	P35579	P35579	1	3	1	0	1	1	768.379	2303.12	2303.14	-5.63	-0.00432	HCD (High Energy Collision Dissociation)	MS2	0	25	50.018	41799	MS201900090_4_PKA.raw	F4		60	50	43	0.00108796	0	1.311e-06	1.29623e+06	49.97
		FALSE	High	Mascot (A5)	Unambiguous	[K].IRELESQISELQEDLESER.[A]		1	1	P35579	P35579	1	3	1	0	1	1	768.378	2303.12	2303.14	-7.48	-0.00574	HCD (High Energy Collision Dissociation)	MS2		25	48.4586	40046	MS201900090_4_PKA.raw	F4		79	50	43	1.49511e-05	0	1.118e-10	94423704	48.7
		FALSE	High	Mascot (A5)	Unambiguous	[K].IRELESQISELQEDLESER.[A]		1	1	P35579	P35579	1	3	1	0	1	1	768.38	2303.13	2303.14	-4.8	-0.00369	HCD (High Energy Collision Dissociation)	MS2	71.3645	25	54.8668	47172	MS201900090_4_PKA.raw	F4		37	50	43	0.225849	8.015e-05	0.0003268
		FALSE	High	Mascot (A5)	Unambiguous	[K].IRELESQISELQEDLESER.[A]		1	1	P35579	P35579	1	3	1	0	1	1	768.382	2303.13	2303.14	-1.78	-0.00137	HCD (High Energy Collision Dissociation)	MS2	39.7864	25	50.5226	42376	MS201900090_4_PKA.raw	F4		49	50	43	0.0130484	8.015e-05	0.000332	1.29623e+06	49.97
		FALSE	High	Mascot (A5)	Unambiguous	[K].IRELESQISELQEDLESER.[A]		1	1	P35579	P35579	1	3	1	0	1	1	768.382	2303.13	2303.14	-1.49	-0.00114	HCD (High Energy Collision Dissociation)	MS2	19.8458	25	51.5592	43510	MS201900090_4_PKA.raw	F4		46	50	43	0.0228808	8.015e-05	0.0002072	1.12782e+06	51.45
		FALSE	High	Mascot (A5)	Unambiguous	[K].IRELESQISELQEDLESER.[A]		1	1	P35579	P35579	1	3	1	0	1	1	768.379	2303.12	2303.14	-5.31	-0.00408	HCD (High Energy Collision Dissociation)	MS2	11.6892	25	53.3138	45436	MS201900090_4_PKA.raw	F4		45	50	43	0.0348941	0.0001341	0.001365
		FALSE	High	Mascot (A5)	Unambiguous	[K].IRELESQISELQEDLESER.[A]		1	1	P35579	P35579	1	3	0.9643	0	1	1	768.389	2303.15	2303.14	7.54	0.00579	HCD (High Energy Collision Dissociation)	MS2	62.4614	25	52.7408	44787	MS201900090_4_PKA.raw	F4		28	49	42	1.43508	0.0001341	0.0007877
		FALSE	High	Mascot (A5)	Unambiguous	[K].IRELESQISELQEDLESER.[A]		1	1	P35579	P35579	1	3		0	1	1	768.379	2303.12	2303.14	-5.58	-0.00429	HCD (High Energy Collision Dissociation)	MS2	86.1563	25	52.4963	44517	MS201900090_4_PKA.raw	F4		0	50	43	1034.27	0.002264	0.05596
		FALSE	High	Mascot (A5)	Unambiguous	[K].IRELESQISELQEDLESER.[A]		1	1	P35579	P35579	1	3	1	0	1	1	768.381	2303.13	2303.14	-2.75	-0.00211	HCD (High Energy Collision Dissociation)	MS2	17.411	25	57.4272	49788	MS201900090_4_PKA.raw	F4		16	50	43	25.841	0.003313	0.08322
	FALSE	High	[K].LQVELDNVTGLLSQSDSK.[S]	1xAcetyl [N-Term]	P35579 1xAcetyl [N-Term]	1.18796e-10	0	1	1	7	P35579	P35579 [1278-1295]	0	1988.02	1	100		High	High	0	1.775e-11	115	68.6	K.LQVELDNVTGLLSQSDSK.S	[1278-1295]	1xAcetyl [N-Term]	Used
		Checked	Confidence	Identifying Node	PSM Ambiguity	Annotated Sequence	Modifications	# Protein Groups	# Proteins	Master Protein Accessions	Protein Accessions	# Missed Cleavages	Charge	DeltaScore	DeltaCn	Rank	Search Engine Rank	m/z [Da]	MH+ [Da]	Theo. MH+ [Da]	DeltaM [ppm]	Deltam/z [Da]	Activation Type	MS Order	Isolation Interference [%]	Ion Inject Time [ms]	RT [min]	First Scan	Spectrum File	File ID	Quan Info	Ions Score	Identity Strict	Identity Relaxed	Expectation Value	Percolator q-Value	Percolator PEP	Precursor Abundance	Apex RT [min]
		FALSE	High	Mascot (A5)	Unambiguous	[K].lQVELDNVTGLLSQSDSK.[S]	N-Term(Acetyl)	1	1	P35579	P35579	0	2	0.9478	0	1	1	994.512	1988.02	1988.02	-0.48	-0.00047	HCD (High Energy Collision Dissociation)	MS2	0	25	69.5158	63660	MS201900090_4_PKA.raw	F4		115	48	41	1.94884e-09	0	1.775e-11	10429878	69.44
		FALSE	High	Mascot (A5)	Unambiguous	[K].lQVELDNVTGLLSQSDSK.[S]	N-Term(Acetyl)	1	1	P35579	P35579	0	3	0.9036	0	1	1	663.344	1988.02	1988.02	0.08	5e-05	HCD (High Energy Collision Dissociation)	MS2	26.9431	25	68.4651	62457	MS201900090_4_PKA.raw	F4		83	48	41	2.98429e-06	0	1.501e-07	4444109	68.6
		FALSE	High	Mascot (A5)	Unambiguous	[K].lQVELDNVTGLLSQSDSK.[S]	N-Term(Acetyl)	1	1	P35579	P35579	0	2	0.9369	0	1	1	994.513	1988.02	1988.02	0.35	0.00035	HCD (High Energy Collision Dissociation)	MS2	3.9937	25	69.0711	63159	MS201900090_4_PKA.raw	F4		111	48	41	5.03146e-09	0	1.163e-10	30265614	68.6
		FALSE	High	Mascot (A5)	Unambiguous	[K].lQVELDNVTGLLSQSDSK.[S]	N-Term(Acetyl)	1	1	P35579	P35579	0	2	0.9369	0	1	1	994.51	1988.01	1988.02	-2.38	-0.00236	HCD (High Energy Collision Dissociation)	MS2	10.242	25	68.4281	62412	MS201900090_4_PKA.raw	F4		111	48	41	5.59114e-09	0	5.897e-10	30265614	68.6
		FALSE	High	Mascot (A5)	Unambiguous	[K].lQVELDNVTGLLSQSDSK.[S]	N-Term(Acetyl)	1	1	P35579	P35579	0	2	1	0	1	1	994.504	1988	1988.02	-8.72	-0.00867	HCD (High Energy Collision Dissociation)	MS2	75.3328	25	70.1856	64436	MS201900090_4_PKA.raw	F4	Not Reliable	47	48	41	0.0148222	0	2.365e-06
		FALSE	High	Mascot (A5)	Unambiguous	[K].lQVELDNVTGLLSQSDSK.[S]	N-Term(Acetyl)	1	1	P35579	P35579	0	2	0.9565	0	1	1	994.513	1988.02	1988.02	-0.1	-0.0001	HCD (High Energy Collision Dissociation)	MS2	32.7259	25	71.2875	65719	MS201900090_4_PKA.raw	F4	Not Reliable	23	48	41	3.35575	0.0002005	0.003029
		FALSE	High	Mascot (A5)	Unambiguous	[K].lQVELDNVTGLLSQSDSK.[S]	N-Term(Acetyl)	1	1	P35579	P35579	0	2	1	0	1	1	994.508	1988.01	1988.02	-4.31	-0.00428	HCD (High Energy Collision Dissociation)	MS2	30.8686	25	58.428	50889	MS201900090_4_PKA.raw	F4		50	48	41	0.00783929	0.0002495	0.004801	2819265	58.03
	FALSE	High	[K].LQVELDNVTGLLSQSDSK.[S]			9.12794e-10	0	1	1	28	P35579	P35579 [1278-1295]	0	1946.01	0	100		High	High	0	1.869e-07	140	54.23	K.LQVELDNVTGLLSQSDSK.S	[1278-1295]		Used
		Checked	Confidence	Identifying Node	PSM Ambiguity	Annotated Sequence	Modifications	# Protein Groups	# Proteins	Master Protein Accessions	Protein Accessions	# Missed Cleavages	Charge	DeltaScore	DeltaCn	Rank	Search Engine Rank	m/z [Da]	MH+ [Da]	Theo. MH+ [Da]	DeltaM [ppm]	Deltam/z [Da]	Activation Type	MS Order	Isolation Interference [%]	Ion Inject Time [ms]	RT [min]	First Scan	Spectrum File	File ID	Quan Info	Ions Score	Identity Strict	Identity Relaxed	Expectation Value	Percolator q-Value	Percolator PEP	Precursor Abundance	Apex RT [min]
		FALSE	High	Mascot (A5)	Unambiguous	[K].LQVELDNVTGLLSQSDSK.[S]		1	1	P35579	P35579	0	2	1	0	1	1	973.5	1945.99	1946.01	-8.13	-0.00791	HCD (High Energy Collision Dissociation)	MS2	10.7635	25	59.9213	52550	MS201900090_4_PKA.raw	F4		70	48	41	7.26231e-05	0	6.26e-07
		FALSE	High	Mascot (A5)	Unambiguous	[K].LQVELDNVTGLLSQSDSK.[S]		1	1	P35579	P35579	0	2	0.9701	0	1	1	973.5	1945.99	1946.01	-7.87	-0.00765	HCD (High Energy Collision Dissociation)	MS2	27.7437	25	62.9369	56014	MS201900090_4_PKA.raw	F4		67	48	41	0.000144536	0	2.712e-05
		FALSE	High	Mascot (A5)	Unambiguous	[K].LQVELDNVTGLLSQSDSK.[S]		1	1	P35579	P35579	0	2	0.9577	0	1	1	973.501	1945.99	1946.01	-7.03	-0.00684	HCD (High Energy Collision Dissociation)	MS2	43.1908	25	63.747	56970	MS201900090_4_PKA.raw	F4		71	48	41	5.19727e-05	0	9.776e-07
		FALSE	High	Mascot (A5)	Unambiguous	[K].LQVELDNVTGLLSQSDSK.[S]		1	1	P35579	P35579	0	2	0.9596	0	1	1	973.499	1945.99	1946.01	-8.39	-0.00816	HCD (High Energy Collision Dissociation)	MS2	54.8835	25	60.0223	52665	MS201900090_4_PKA.raw	F4		99	48	41	8.54606e-08	0	2.257e-07
		FALSE	High	Mascot (A5)	Unambiguous	[K].LQVELDNVTGLLSQSDSK.[S]		1	1	P35579	P35579	0	2	1	0	1	1	973.495	1945.98	1946.01	-12.68	-0.01234	HCD (High Energy Collision Dissociation)	MS2	56.285	25	53.6884	45862	MS201900090_4_PKA.raw	F4		63	48	41	0.000347469	0	3.473e-08
		FALSE	High	Mascot (A5)	Unambiguous	[K].LQVELDNVTGLLSQSDSK.[S]		1	1	P35579	P35579	0	2	1	0	1	1	973.498	1945.99	1946.01	-9.97	-0.0097	HCD (High Energy Collision Dissociation)	MS2	11.9835	25	62.2477	55216	MS201900090_4_PKA.raw	F4		49	48	41	0.00885739	0	2.954e-05
		FALSE	High	Mascot (A5)	Unambiguous	[K].LQVELDNVTGLLSQSDSK.[S]		1	1	P35579	P35579	0	2	1	0	1	1	973.49	1945.97	1946.01	-18.38	-0.01788	HCD (High Energy Collision Dissociation)	MS2	0	25	62.7362	55775	MS201900090_4_PKA.raw	F4		47	49	42	0.0167247	0	2.244e-05	2174120	62.45
		FALSE	High	Mascot (A5)	Unambiguous	[K].LQVELDNVTGLLSQSDSK.[S]		1	1	P35579	P35579	0	2	0.8913	0	1	1	973.507	1946.01	1946.01	-0.49	-0.00047	HCD (High Energy Collision Dissociation)	MS2	0	25	56.4784	48768	MS201900090_4_PKA.raw	F4		92	47	40	4.19245e-07	0	3.394e-10
		FALSE	High	Mascot (A5)	Unambiguous	[K].LQVELDNVTGLLSQSDSK.[S]		1	1	P35579	P35579	0	2	0.8487	0	1	1	973.507	1946.01	1946.01	-0.37	-0.00036	HCD (High Energy Collision Dissociation)	MS2	6.00622	6.184	54.6294	46903	MS201900090_4_PKA.raw	F4		119	47	40	8.03728e-10	0	1.619e-10	798081344	54.23
		FALSE	High	Mascot (A5)	Unambiguous	[K].LQVELDNVTGLLSQSDSK.[S]		1	1	P35579	P35579	0	2	0.9099	0	1	1	973.507	1946.01	1946.01	-0.17	-0.00017	HCD (High Energy Collision Dissociation)	MS2	3.18628	24.141	55.1099	47441	MS201900090_4_PKA.raw	F4		111	47	40	4.38096e-09	0	5.48e-10	798081344	54.23
		FALSE	High	Mascot (A5)	Unambiguous	[K].LQVELDNVTGLLSQSDSK.[S]		1	1	P35579	P35579	0	2	0.8426	0	1	1	973.507	1946.01	1946.01	-0.43	-0.00042	HCD (High Energy Collision Dissociation)	MS2	5.76458	25	56.9367	49235	MS201900090_4_PKA.raw	F4		108	47	40	9.93447e-09	0	6.746e-09
		FALSE	High	Mascot (A5)	Unambiguous	[K].LQVELDNVTGLLSQSDSK.[S]		1	1	P35579	P35579	0	2	0.7925	0	1	1	973.506	1946.01	1946.01	-1.16	-0.00113	HCD (High Energy Collision Dissociation)	MS2	66.5242	25	61.5709	54465	MS201900090_4_PKA.raw	F4		53	47	40	0.00307018	0	4.677e-06
		FALSE	High	Mascot (A5)	Unambiguous	[K].LQVELDNVTGLLSQSDSK.[S]		1	1	P35579	P35579	0	2	0.9831	0	1	1	973.504	1946	1946.01	-3.86	-0.00376	HCD (High Energy Collision Dissociation)	MS2	0	25	62.0389	54978	MS201900090_4_PKA.raw	F4		59	48	41	0.000779317	0	2.088e-07
		FALSE	High	Mascot (A5)	Unambiguous	[K].LQVELDNVTGLLSQSDSK.[S]		1	1	P35579	P35579	0	2	1	0	1	1	973.504	1946	1946.01	-3.69	-0.00359	HCD (High Energy Collision Dissociation)	MS2	39.5585	25	64.1344	57429	MS201900090_4_PKA.raw	F4		60	48	41	0.000707667	0	2.904e-06
		FALSE	High	Mascot (A5)	Unambiguous	[K].LQVELDNVTGLLSQSDSK.[S]		1	1	P35579	P35579	0	2	0.8447	0	1	1	973.505	1946	1946.01	-2.6	-0.00253	HCD (High Energy Collision Dissociation)	MS2	71.9236	25	58.0191	50407	MS201900090_4_PKA.raw	F4		103	47	40	3.26413e-08	0	6.255e-10
		FALSE	High	Mascot (A5)	Unambiguous	[K].LQVELDNVTGLLSQSDSK.[S]		1	1	P35579	P35579	0	2	1	0	1	1	973.506	1946	1946.01	-1.86	-0.00181	HCD (High Energy Collision Dissociation)	MS2	46.4587	25	59.9409	52575	MS201900090_4_PKA.raw	F4		86	47	40	1.4513e-06	0	3.679e-08
		FALSE	High	Mascot (A5)	Unambiguous	[K].LQVELDNVTGLLSQSDSK.[S]		1	1	P35579	P35579	0	2	0.9091	0	1	1	973.506	1946	1946.01	-1.41	-0.00137	HCD (High Energy Collision Dissociation)	MS2	21.8836	25	60.4781	53211	MS201900090_4_PKA.raw	F4		99	47	40	7.65598e-08	0	1.914e-09
		FALSE	High	Mascot (A5)	Unambiguous	[K].LQVELDNVTGLLSQSDSK.[S]		1	1	P35579	P35579	0	2	0.9281	0	1	1	973.508	1946.01	1946.01	0.06	5e-05	HCD (High Energy Collision Dissociation)	MS2	27.3827	25	57.5192	49851	MS201900090_4_PKA.raw	F4		139	47	40	6.87309e-12	0	1.489e-09
		FALSE	High	Mascot (A5)	Unambiguous	[K].LQVELDNVTGLLSQSDSK.[S]		1	1	P35579	P35579	0	2	0.856	0	1	1	973.508	1946.01	1946.01	0.39	0.00038	HCD (High Energy Collision Dissociation)	MS2	0	25	56.0416	48442	MS201900090_4_PKA.raw	F4		125	47	40	1.83902e-10	0	7.91e-09	12498093	55.81
		FALSE	High	Mascot (A5)	Unambiguous	[K].LQVELDNVTGLLSQSDSK.[S]		1	1	P35579	P35579	0	2	0.9274	0	1	1	973.508	1946.01	1946.01	0.83	0.00081	HCD (High Energy Collision Dissociation)	MS2	6.94292	22.981	55.6065	47955	MS201900090_4_PKA.raw	F4		124	47	40	2.10865e-10	0	4.341e-09	12498093	55.81
		FALSE	High	Mascot (A5)	Unambiguous	[K].LQVELDNVTGLLSQSDSK.[S]		1	1	P35579	P35579	0	2	0.8786	0	1	1	973.508	1946.01	1946.01	0.88	0.00085	HCD (High Energy Collision Dissociation)	MS2	0	0.337	54.1881	46432	MS201900090_4_PKA.raw	F4		140	47	40	6.03137e-12	0	1.869e-07	798081344	54.23
		FALSE	High	Mascot (A5)	Unambiguous	[K].LQVELDNVTGLLSQSDSK.[S]		1	1	P35579	P35579	0	2	0.8696	0	1	1	973.51	1946.01	1946.01	2.28	0.00222	HCD (High Energy Collision Dissociation)	MS2	30.893	25	63.539	56722	MS201900090_4_PKA.raw	F4		69	47	40	7.37138e-05	0	8.917e-07
		FALSE	High	Mascot (A5)	Unambiguous	[K].LQVELDNVTGLLSQSDSK.[S]		1	1	P35579	P35579	0	2	0.9592	0	1	1	973.505	1946	1946.01	-2.69	-0.00262	HCD (High Energy Collision Dissociation)	MS2	50.2832	25	66.4155	60073	MS201900090_4_PKA.raw	F4		49	47	40	0.00770043	8.015e-05	4.942e-05
		FALSE	High	Mascot (A5)	Unambiguous	[K].LQVELDNVTGLLSQSDSK.[S]		1	1	P35579	P35579	0	2	1	0	1	1	973.5	1945.99	1946.01	-7.47	-0.00727	HCD (High Energy Collision Dissociation)	MS2	39.6067	25	64.2394	57550	MS201900090_4_PKA.raw	F4		30	48	41	0.652898	0.0001341	0.002287
		FALSE	High	Mascot (A5)	Unambiguous	[K].LQVELDNVTGLLSQSDSK.[S]		1	1	P35579	P35579	0	2	0.875	0	1	1	973.503	1946	1946.01	-4.51	-0.00439	HCD (High Energy Collision Dissociation)	MS2	45.4268	25	65.3794	58857	MS201900090_4_PKA.raw	F4		32	48	41	0.392154	0.0001341	0.001735	180373	65.27
		FALSE	High	Mascot (A5)	Unambiguous	[K].LQVELDNVTGLLSQSDSK.[S]		1	1	P35579	P35579	0	2	1	0	1	1	973.498	1945.99	1946.01	-9.8	-0.00954	HCD (High Energy Collision Dissociation)	MS2	31.7203	25	62.9087	55981	MS201900090_4_PKA.raw	F4		39	48	41	0.100982	0.0001341	0.0008713
		FALSE	High	Mascot (A5)	Unambiguous	[K].LQVELDNVTGLLSQSDSK.[S]		1	1	P35579	P35579	0	2	0.9583	0	1	1	973.505	1946	1946.01	-2.58	-0.00251	HCD (High Energy Collision Dissociation)	MS2	67.2458	25	71.2592	65686	MS201900090_4_PKA.raw	F4		24	47	41	2.29357	0.0003085	0.006159	436445	70.61
		FALSE	High	Mascot (A5)	Unambiguous	[K].LQVELDNVTGLLSQSDSK.[S]		1	1	P35579	P35579	0	2	0.875	0	1	1	973.508	1946.01	1946.01	0.54	0.00053	HCD (High Energy Collision Dissociation)	MS2	0	25	74.1895	69017	MS201900090_4_PKA.raw	F4		24	47	40	2.53946	0.00356	0.08839
	FALSE	High	[K].LQLQEQLQAETELCAEAEELR.[A]			5.84792e-06	0	1	1	1	P35579	P35579 [883-903]	0	2444.2	0		No Quan Values	High	High	0	2.107e-06	72		K.LQLQEQLQAETELCAEAEELR.A	[883-903]		Not Used
		Checked	Confidence	Identifying Node	PSM Ambiguity	Annotated Sequence	Modifications	# Protein Groups	# Proteins	Master Protein Accessions	Protein Accessions	# Missed Cleavages	Charge	DeltaScore	DeltaCn	Rank	Search Engine Rank	m/z [Da]	MH+ [Da]	Theo. MH+ [Da]	DeltaM [ppm]	Deltam/z [Da]	Activation Type	MS Order	Isolation Interference [%]	Ion Inject Time [ms]	RT [min]	First Scan	Spectrum File	File ID	Quan Info	Ions Score	Identity Strict	Identity Relaxed	Expectation Value	Percolator q-Value	Percolator PEP	Precursor Abundance	Apex RT [min]
		FALSE	High	Mascot (A5)	Unambiguous	[K].LQLQEQLQAETELCAEAEELR.[A]		1	1	P35579	P35579	0	3	0.9306	0	1	1	815.41	2444.22	2444.2	7.29	0.00594	HCD (High Energy Collision Dissociation)	MS2	69.2204	25	72.3711	66915	MS201900090_4_PKA.raw	F4		72	49	42	5.77238e-05	0	2.107e-06
	FALSE	High	[K].LKSMEAEMIQLQEELAAAER.[A]	2xOxidation [M4; M8]		2.00588e-05	0	1	1	2	P35579	P35579 [1675-1694]	1	2322.13	0		Not Reliable	High	High	0	7.998e-06	55		K.LKSMEAEMIQLQEELAAAER.A	[1675-1694]		Not Used
		Checked	Confidence	Identifying Node	PSM Ambiguity	Annotated Sequence	Modifications	# Protein Groups	# Proteins	Master Protein Accessions	Protein Accessions	# Missed Cleavages	Charge	DeltaScore	DeltaCn	Rank	Search Engine Rank	m/z [Da]	MH+ [Da]	Theo. MH+ [Da]	DeltaM [ppm]	Deltam/z [Da]	Activation Type	MS Order	Isolation Interference [%]	Ion Inject Time [ms]	RT [min]	First Scan	Spectrum File	File ID	Quan Info	Ions Score	Identity Strict	Identity Relaxed	Expectation Value	Percolator q-Value	Percolator PEP	Precursor Abundance	Apex RT [min]
		FALSE	High	Mascot (A5)	Unambiguous	[K].LKSmEAEmIQLQEELAAAER.[A]	M4(Oxidation); M8(Oxidation)	1	1	P35579	P35579	1	3	0.6182	0	1	1	774.714	2322.13	2322.13	-1.92	-0.00148	HCD (High Energy Collision Dissociation)	MS2	65.3242	25	35.7465	25926	MS201900090_4_PKA.raw	F4	Not Reliable	55	50	43	0.00347402	0	7.998e-06
		FALSE	High	Mascot (A5)	Unambiguous	[K].LKSmEAEmIQLQEELAAAER.[A]	M4(Oxidation); M8(Oxidation)	1	1	P35579	P35579	1	3	0.6923	0	1	1	774.711	2322.12	2322.13	-5.73	-0.00444	HCD (High Energy Collision Dissociation)	MS2	40.755	25	36.2813	26529	MS201900090_4_PKA.raw	F4	Not Reliable	13	50	43	68.6527	0.0004105	0.0102
	FALSE	High	[K].LKDVLLQVDDER.[R]			5.47603e-05	0	1	1	2	P35579	P35579 [1844-1855]	1	1442.78	0	100		High	High	0	2.369e-05	76	27.18	K.LKDVLLQVDDER.R	[1844-1855]		Used
		Checked	Confidence	Identifying Node	PSM Ambiguity	Annotated Sequence	Modifications	# Protein Groups	# Proteins	Master Protein Accessions	Protein Accessions	# Missed Cleavages	Charge	DeltaScore	DeltaCn	Rank	Search Engine Rank	m/z [Da]	MH+ [Da]	Theo. MH+ [Da]	DeltaM [ppm]	Deltam/z [Da]	Activation Type	MS Order	Isolation Interference [%]	Ion Inject Time [ms]	RT [min]	First Scan	Spectrum File	File ID	Quan Info	Ions Score	Identity Strict	Identity Relaxed	Expectation Value	Percolator q-Value	Percolator PEP	Precursor Abundance	Apex RT [min]
		FALSE	High	Mascot (A5)	Unambiguous	[K].LKDVLLQVDDER.[R]		1	1	P35579	P35579	1	2	0.8816	0	1	1	721.896	1442.78	1442.78	-0.51	-0.00037	HCD (High Energy Collision Dissociation)	MS2	54.7783	17.104	27.0674	16819	MS201900090_4_PKA.raw	F4		76	45	38	8.94885e-06	0	2.369e-05	23757764	27.18
		FALSE	High	Mascot (A5)	Unambiguous	[K].LKDVLLQVDDER.[R]		1	1	P35579	P35579	1	2	1	0	1	1	721.901	1442.79	1442.78	6.53	0.00471	HCD (High Energy Collision Dissociation)	MS2	33.299	25	27.5454	17356	MS201900090_4_PKA.raw	F4		41	45	38	0.0248283	8.015e-05	0.0001866	23757764	27.18
	FALSE	High	[R].IIGLDQVAGMSETALPGAFK.[T]			1.01539e-09	0	1	1	16	P35579	P35579 [618-637]	0	2018.06	1	100		High	High	0	1.806e-10	97	64.75	R.IIGLDQVAGMSETALPGAFK.T	[618-637]		Used
		Checked	Confidence	Identifying Node	PSM Ambiguity	Annotated Sequence	Modifications	# Protein Groups	# Proteins	Master Protein Accessions	Protein Accessions	# Missed Cleavages	Charge	DeltaScore	DeltaCn	Rank	Search Engine Rank	m/z [Da]	MH+ [Da]	Theo. MH+ [Da]	DeltaM [ppm]	Deltam/z [Da]	Activation Type	MS Order	Isolation Interference [%]	Ion Inject Time [ms]	RT [min]	First Scan	Spectrum File	File ID	Quan Info	Ions Score	Identity Strict	Identity Relaxed	Expectation Value	Percolator q-Value	Percolator PEP	Precursor Abundance	Apex RT [min]
		FALSE	High	Mascot (A5)	Unambiguous	[R].IIGLDQVAGMSETALPGAFK.[T]		1	1	P35579	P35579	0	2	1	0	1	1	1009.54	2018.07	2018.06	1.93	0.00194	HCD (High Energy Collision Dissociation)	MS2	26.253	25	67.8048	61699	MS201900090_4_PKA.raw	F4		54	46	39	0.00203411	0	1.225e-07
		FALSE	High	Mascot (A5)	Unambiguous	[R].IIGLDQVAGMSETALPGAFK.[T]		1	1	P35579	P35579	0	2	1	0	1	1	1009.54	2018.07	2018.06	3.1	0.00313	HCD (High Energy Collision Dissociation)	MS2	0	25	58.927	51442	MS201900090_4_PKA.raw	F4		73	46	39	2.23261e-05	0	4.48e-09	6.67548e+06	59.05
		FALSE	High	Mascot (A5)	Unambiguous	[R].IIGLDQVAGMSETALPGAFK.[T]		1	1	P35579	P35579	0	2	0.8611	0	1	1	1009.54	2018.07	2018.06	3.32	0.00335	HCD (High Energy Collision Dissociation)	MS2	8.08061	25	64.4285	57774	MS201900090_4_PKA.raw	F4		72	46	39	2.81876e-05	0	3.631e-09	709231296	64.75
		FALSE	High	Mascot (A5)	Unambiguous	[R].IIGLDQVAGMSETALPGAFK.[T]		1	1	P35579	P35579	0	2	0.9875	0	1	1	1009.54	2018.07	2018.06	3.75	0.00378	HCD (High Energy Collision Dissociation)	MS2	0	0.549	64.8742	58273	MS201900090_4_PKA.raw	F4		80	46	39	4.10795e-06	0	9.57e-08	709231296	64.75
		FALSE	High	Mascot (A5)	Unambiguous	[R].IIGLDQVAGMSETALPGAFK.[T]		1	1	P35579	P35579	0	2	0.9634	0	1	1	1009.53	2018.06	2018.06	-3.77	-0.0038	HCD (High Energy Collision Dissociation)	MS2	0	25	61.1461	53966	MS201900090_4_PKA.raw	F4		82	47	40	3.2829e-06	0	7.243e-07	638257	61.2
		FALSE	High	Mascot (A5)	Unambiguous	[R].IIGLDQVAGMSETALPGAFK.[T]		1	1	P35579	P35579	0	2	0.9846	0	1	1	1009.53	2018.06	2018.06	-0.95	-0.00096	HCD (High Energy Collision Dissociation)	MS2	9.35849	10.471	65.3596	58834	MS201900090_4_PKA.raw	F4		65	47	40	0.000151253	0	1.209e-08	709231296	64.75
		FALSE	High	Mascot (A5)	Unambiguous	[R].IIGLDQVAGMSETALPGAFK.[T]		1	1	P35579	P35579	0	2	0.9405	0	1	1	1009.53	2018.06	2018.06	-0.49	-0.00049	HCD (High Energy Collision Dissociation)	MS2	16.7979	25	66.8109	60538	MS201900090_4_PKA.raw	F4		84	46	39	1.98435e-06	0	2.86e-10	709231296	64.75
		FALSE	High	Mascot (A5)	Unambiguous	[R].IIGLDQVAGMSETALPGAFK.[T]		1	1	P35579	P35579	0	2	1	0	1	1	1009.53	2018.06	2018.06	-0.01	-1e-05	HCD (High Energy Collision Dissociation)	MS2	0	25	67.3065	61116	MS201900090_4_PKA.raw	F4		76	46	39	1.12454e-05	0	3.898e-09
		FALSE	High	Mascot (A5)	Unambiguous	[R].IIGLDQVAGMSETALPGAFK.[T]		1	1	P35579	P35579	0	2	0.987	0	1	1	1009.54	2018.06	2018.06	0.11	0.00011	HCD (High Energy Collision Dissociation)	MS2	19.7838	23.419	65.8335	59396	MS201900090_4_PKA.raw	F4		77	46	39	1.04279e-05	0	1.493e-08	709231296	64.75
		FALSE	High	Mascot (A5)	Unambiguous	[R].IIGLDQVAGMSETALPGAFK.[T]		1	1	P35579	P35579	0	2	0.9691	0	1	1	1009.54	2018.06	2018.06	0.38	0.00038	HCD (High Energy Collision Dissociation)	MS2	2.95739	25	66.336	59982	MS201900090_4_PKA.raw	F4		97	46	39	9.45119e-08	0	1.806e-10	709231296	64.75
		FALSE	High	Mascot (A5)	Unambiguous	[R].IIGLDQVAGMSETALPGAFK.[T]		1	1	P35579	P35579	0	2	1	0	1	1	1009.54	2018.07	2018.06	1.78	0.00179	HCD (High Energy Collision Dissociation)	MS2	87.3789	25	68.8215	62873	MS201900090_4_PKA.raw	F4		38	46	39	0.0763791	8.015e-05	3.565e-05
		FALSE	High	Mascot (A5)	Unambiguous	[R].IIGLDQVAGMSETALPGAFK.[T]		1	1	P35579	P35579	0	2	0.85	0	1	1	1009.54	2018.06	2018.06	0.72	0.00073	HCD (High Energy Collision Dissociation)	MS2	66.1679	25	63.897	57146	MS201900090_4_PKA.raw	F4		20	46	39	4.58258	0.0001341	0.001328	709231296	64.75
		FALSE	High	Mascot (A5)	Unambiguous	[R].IIGLDQVAGMSETALPGAFK.[T]		1	1	P35579	P35579	0	2	1	0	1	1	1009.54	2018.07	2018.06	4.56	0.0046	HCD (High Energy Collision Dissociation)	MS2	73.0521	25	70.6553	64991	MS201900090_4_PKA.raw	F4		6	46	39	108.484	0.0004105	0.009142
		FALSE	High	Mascot (A5)	Unambiguous	[R].IIGLDQVAGMSETALPGAFK.[T]		1	1	P35579	P35579	0	2	1	0	1	1	1009.54	2018.07	2018.06	4.6	0.00464	HCD (High Energy Collision Dissociation)	MS2	63.7259	25	71.1911	65606	MS201900090_4_PKA.raw	F4		12	46	39	29.7485	0.0007363	0.01382
		FALSE	High	Mascot (A5)	Unambiguous	[R].IIGLDQVAGMSETALPGAFK.[T]		1	1	P35579	P35579	0	2	1	0	1	1	1009.53	2018.06	2018.06	-2.19	-0.00221	HCD (High Energy Collision Dissociation)	MS2	35.5449	25	73.8384	68625	MS201900090_4_PKA.raw	F4		20	47	40	5.22488	0.00212	0.05247	310002	72.98
		FALSE	High	Mascot (A5)	Unambiguous	[R].IIGLDQVAGMSETALPGAFK.[T]		1	1	P35579	P35579	0	2	1	0	1	1	1009.53	2018.06	2018.06	-2.68	-0.0027	HCD (High Energy Collision Dissociation)	MS2	39.9833	25	59.4125	51949	MS201900090_4_PKA.raw	F4		4	47	40	202.834	0.002935	0.07487	6.67548e+06	59.05
	FALSE	High	[R].IIGLDQVAGMSETALPGAFK.[T]	1xAcetyl [N-Term]; 1xOxidation [M10]	P35579 1xAcetyl [N-Term]	3.65883e-05	0	1	1	1	P35579	P35579 [618-637]	0	2076.07	0	100		High	High	0	1.532e-05	11	69.01	R.IIGLDQVAGMSETALPGAFK.T	[618-637]	1xAcetyl [N-Term]	Used
		Checked	Confidence	Identifying Node	PSM Ambiguity	Annotated Sequence	Modifications	# Protein Groups	# Proteins	Master Protein Accessions	Protein Accessions	# Missed Cleavages	Charge	DeltaScore	DeltaCn	Rank	Search Engine Rank	m/z [Da]	MH+ [Da]	Theo. MH+ [Da]	DeltaM [ppm]	Deltam/z [Da]	Activation Type	MS Order	Isolation Interference [%]	Ion Inject Time [ms]	RT [min]	First Scan	Spectrum File	File ID	Quan Info	Ions Score	Identity Strict	Identity Relaxed	Expectation Value	Percolator q-Value	Percolator PEP	Precursor Abundance	Apex RT [min]
		FALSE	High	Mascot (A5)	Unambiguous	[R].iIGLDQVAGmSETALPGAFK.[T]	N-Term(Acetyl); M10(Oxidation)	1	1	P35579	P35579	0	2	0.4545	0	1	1	1038.53	2076.05	2076.07	-8.79	-0.00913	HCD (High Energy Collision Dissociation)	MS2	12.3146	18.014	69.0163	63095	MS201900090_4_PKA.raw	F4		11	48	41	66.9133	0	1.532e-05	6.2065e+06	69.01
	FALSE	High	[R].IIGLDQVAGMSETALPGAFK.[T]	1xOxidation [M10]		2.46129e-08	0	1	1	27	P35579	P35579 [618-637]	0	2034.06	0	100		High	High	0	5.7e-09	92	54.48	R.IIGLDQVAGMSETALPGAFK.T	[618-637]		Used
		Checked	Confidence	Identifying Node	PSM Ambiguity	Annotated Sequence	Modifications	# Protein Groups	# Proteins	Master Protein Accessions	Protein Accessions	# Missed Cleavages	Charge	DeltaScore	DeltaCn	Rank	Search Engine Rank	m/z [Da]	MH+ [Da]	Theo. MH+ [Da]	DeltaM [ppm]	Deltam/z [Da]	Activation Type	MS Order	Isolation Interference [%]	Ion Inject Time [ms]	RT [min]	First Scan	Spectrum File	File ID	Quan Info	Ions Score	Identity Strict	Identity Relaxed	Expectation Value	Percolator q-Value	Percolator PEP	Precursor Abundance	Apex RT [min]
		FALSE	High	Mascot (A5)	Unambiguous	[R].IIGLDQVAGmSETALPGAFK.[T]	M10(Oxidation)	1	1	P35579	P35579	0	2	1	0	1	1	1017.53	2034.06	2034.06	-1.04	-0.00106	HCD (High Energy Collision Dissociation)	MS2	6.25425	25	55.7561	48123	MS201900090_4_PKA.raw	F4		43	47	40	0.0297126	0	1.89e-06	738867712	54.48
		FALSE	High	Mascot (A5)	Unambiguous	[R].IIGLDQVAGmSETALPGAFK.[T]	M10(Oxidation)	1	1	P35579	P35579	0	2	0.987	0	1	1	1017.53	2034.06	2034.06	-0.78	-0.00079	HCD (High Energy Collision Dissociation)	MS2	18.4037	25	59.6984	52286	MS201900090_4_PKA.raw	F4		77	47	40	1.02429e-05	0	1.969e-08	7769254	59.01
		FALSE	High	Mascot (A5)	Unambiguous	[R].IIGLDQVAGmSETALPGAFK.[T]	M10(Oxidation)	1	1	P35579	P35579	0	2	1	0	1	1	1017.53	2034.06	2034.06	-0.82	-0.00083	HCD (High Energy Collision Dissociation)	MS2	0	25	63.0328	56124	MS201900090_4_PKA.raw	F4		45	47	40	0.018344	0	3.578e-06
		FALSE	High	Mascot (A5)	Unambiguous	[R].IIGLDQVAGmSETALPGAFK.[T]	M10(Oxidation)	1	1	P35579	P35579	0	2	1	0	1	1	1017.53	2034.06	2034.06	-0.75	-0.00076	HCD (High Energy Collision Dissociation)	MS2	2.89849	25	62.5341	55544	MS201900090_4_PKA.raw	F4		58	47	40	0.000886617	0	4.204e-07
		FALSE	High	Mascot (A5)	Unambiguous	[R].IIGLDQVAGmSETALPGAFK.[T]	M10(Oxidation)	1	1	P35579	P35579	0	2	1	0	1	1	1017.53	2034.05	2034.06	-2.25	-0.00229	HCD (High Energy Collision Dissociation)	MS2	0	25	56.8139	49104	MS201900090_4_PKA.raw	F4		33	47	40	0.289315	0	1.792e-06
		FALSE	High	Mascot (A5)	Unambiguous	[R].IIGLDQVAGmSETALPGAFK.[T]	M10(Oxidation)	1	1	P35579	P35579	0	2	0.98	0	1	1	1017.53	2034.04	2034.06	-6.95	-0.00707	HCD (High Energy Collision Dissociation)	MS2	19.4032	25	58.7551	51248	MS201900090_4_PKA.raw	F4		50	48	41	0.0064741	0	5.819e-07	7769254	59.01
		FALSE	High	Mascot (A5)	Unambiguous	[R].IIGLDQVAGmSETALPGAFK.[T]	M10(Oxidation)	1	1	P35579	P35579	0	2	1	0	1	1	1017.53	2034.05	2034.06	-5.45	-0.00554	HCD (High Energy Collision Dissociation)	MS2	18.8848	25	64.5788	57951	MS201900090_4_PKA.raw	F4		25	47	41	2.13032	0	1.007e-05	1.16014e+06	65
		FALSE	High	Mascot (A5)	Unambiguous	[R].IIGLDQVAGmSETALPGAFK.[T]	M10(Oxidation)	1	1	P35579	P35579	0	2	1	0	1	1	1017.53	2034.05	2034.06	-4.11	-0.00418	HCD (High Energy Collision Dissociation)	MS2	4.91395	25	61.1393	53958	MS201900090_4_PKA.raw	F4		25	47	40	1.76759	0	9.909e-06
		FALSE	High	Mascot (A5)	Unambiguous	[R].IIGLDQVAGmSETALPGAFK.[T]	M10(Oxidation)	1	1	P35579	P35579	0	2	1	0	1	1	1017.53	2034.05	2034.06	-3.56	-0.00362	HCD (High Energy Collision Dissociation)	MS2	10.0392	25	56.3645	48673	MS201900090_4_PKA.raw	F4		26	47	40	1.5373	0	3.793e-06
		FALSE	High	Mascot (A5)	Unambiguous	[R].IIGLDQVAGmSETALPGAFK.[T]	M10(Oxidation)	1	1	P35579	P35579	0	2	1	0	1	1	1017.53	2034.06	2034.06	2.18	0.00221	HCD (High Energy Collision Dissociation)	MS2	14.1159	25	60.1937	52868	MS201900090_4_PKA.raw	F4		52	47	40	0.00333373	0	2.439e-07	7769254	59.01
		FALSE	High	Mascot (A5)	Unambiguous	[R].IIGLDQVAGmSETALPGAFK.[T]	M10(Oxidation)	1	1	P35579	P35579	0	2	1	0	1	1	1017.53	2034.06	2034.06	2.19	0.00223	HCD (High Energy Collision Dissociation)	MS2	66.3749	25	63.9133	57167	MS201900090_4_PKA.raw	F4		9	47	40	71.4652	0	3.127e-05
		FALSE	High	Mascot (A5)	Unambiguous	[R].IIGLDQVAGmSETALPGAFK.[T]	M10(Oxidation)	1	1	P35579	P35579	0	2	1	0	1	1	1017.54	2034.07	2034.06	4.35	0.00442	HCD (High Energy Collision Dissociation)	MS2	8.97818	25	62.057	54999	MS201900090_4_PKA.raw	F4		53	47	40	0.00233406	0	8.74e-08
		FALSE	High	Mascot (A5)	Unambiguous	[R].IIGLDQVAGmSETALPGAFK.[T]	M10(Oxidation)	1	1	P35579	P35579	0	2	1	0	1	1	1017.53	2034.06	2034.06	-0.1	-0.0001	HCD (High Energy Collision Dissociation)	MS2	0	25	57.3084	49657	MS201900090_4_PKA.raw	F4		33	47	40	0.261633	0	1.512e-05
		FALSE	High	Mascot (A5)	Unambiguous	[R].IIGLDQVAGmSETALPGAFK.[T]	M10(Oxidation)	1	1	P35579	P35579	0	2	0.9891	0	1	1	1017.53	2034.06	2034.06	-0.03	-3e-05	HCD (High Energy Collision Dissociation)	MS2	0	5.232	54.8423	47143	MS201900090_4_PKA.raw	F4		92	47	40	3.53785e-07	0	5.7e-09	738867712	54.48
		FALSE	High	Mascot (A5)	Unambiguous	[R].IIGLDQVAGmSETALPGAFK.[T]	M10(Oxidation)	1	1	P35579	P35579	0	2	1	0	1	1	1017.53	2034.06	2034.06	-0.02	-2e-05	HCD (High Energy Collision Dissociation)	MS2	0	25	55.2726	47601	MS201900090_4_PKA.raw	F4		58	47	40	0.000909368	0	8.717e-08	738867712	54.48
		FALSE	High	Mascot (A5)	Unambiguous	[R].IIGLDQVAGmSETALPGAFK.[T]	M10(Oxidation)	1	1	P35579	P35579	0	2	0.9875	0	1	1	1017.53	2034.06	2034.06	0.15	0.00015	HCD (High Energy Collision Dissociation)	MS2	0.226771	0.69	54.356	46609	MS201900090_4_PKA.raw	F4		80	47	40	4.99831e-06	0	1.156e-07	738867712	54.48
		FALSE	High	Mascot (A5)	Unambiguous	[R].IIGLDQVAGmSETALPGAFK.[T]	M10(Oxidation)	1	1	P35579	P35579	0	2	1	0	1	1	1017.53	2034.06	2034.06	0.45	0.00046	HCD (High Energy Collision Dissociation)	MS2	27.559	25	61.6197	54525	MS201900090_4_PKA.raw	F4		64	47	40	0.000222472	0	3.054e-08
		FALSE	High	Mascot (A5)	Unambiguous	[R].IIGLDQVAGmSETALPGAFK.[T]	M10(Oxidation)	1	1	P35579	P35579	0	2	1	0	1	1	1017.53	2034.06	2034.06	1.06	0.00108	HCD (High Energy Collision Dissociation)	MS2	5.12566	17.304	59.2065	51716	MS201900090_4_PKA.raw	F4		51	47	40	0.0039807	0	1.765e-06	7769254	59.01
		FALSE	High	Mascot (A5)	Unambiguous	[R].IIGLDQVAGmSETALPGAFK.[T]	M10(Oxidation)	1	1	P35579	P35579	0	2	0.9348	0	1	1	1017.53	2034.06	2034.06	1.76	0.00179	HCD (High Energy Collision Dissociation)	MS2	0	25	60.6642	53434	MS201900090_4_PKA.raw	F4		46	47	40	0.0132129	0	6.252e-08	7769254	59.01
		FALSE	High	Mascot (A5)	Unambiguous	[R].IIGLDQVAGmSETALPGAFK.[T]	M10(Oxidation)	1	1	P35579	P35579	0	2	1	0	1	1	1017.54	2034.06	2034.06	2.65	0.00269	HCD (High Energy Collision Dissociation)	MS2	11.2017	25	64.0855	57369	MS201900090_4_PKA.raw	F4		5	47	40	163.548	8.015e-05	0.0005739
		FALSE	High	Mascot (A5)	Unambiguous	[R].IIGLDQVAGmSETALPGAFK.[T]	M10(Oxidation)	1	1	P35579	P35579	0	2	1	0	1	1	1017.53	2034.05	2034.06	-2.34	-0.00238	HCD (High Energy Collision Dissociation)	MS2	42.0452	25	57.8081	50189	MS201900090_4_PKA.raw	F4		18	47	40	10.0876	8.015e-05	9.295e-05	1882460	58.03
		FALSE	High	Mascot (A5)	Unambiguous	[R].IIGLDQVAGmSETALPGAFK.[T]	M10(Oxidation)	1	1	P35579	P35579	0	2	1	0	1	1	1017.53	2034.05	2034.06	-1.76	-0.00179	HCD (High Energy Collision Dissociation)	MS2	15.754	25	58.272	50707	MS201900090_4_PKA.raw	F4		15	47	40	17.7677	8.015e-05	0.0001253	1882460	58.03
		FALSE	High	Mascot (A5)	Unambiguous	[R].IIGLDQVAGmSETALPGAFK.[T]	M10(Oxidation)	1	1	P35579	P35579	0	2	1	0	1	1	1017.53	2034.05	2034.06	-1.84	-0.00188	HCD (High Energy Collision Dissociation)	MS2	6.06692	25	63.5336	56715	MS201900090_4_PKA.raw	F4		29	47	40	0.769455	8.015e-05	5.746e-05
		FALSE	High	Mascot (A5)	Unambiguous	[R].IIGLDQVAGmSETALPGAFK.[T]	M10(Oxidation)	1	1	P35579	P35579	0	2	1	0	1	1	1017.53	2034.05	2034.06	-5.31	-0.0054	HCD (High Energy Collision Dissociation)	MS2	23.3757	25	51.1412	43075	MS201900090_4_PKA.raw	F4		14	47	40	27.9028	0.0001341	0.001167	13978086	51.03
		FALSE	High	Mascot (A5)	Unambiguous	[R].IIGLDQVAGmSETALPGAFK.[T]	M10(Oxidation)	1	1	P35579	P35579	0	2	1	0	1	1	1017.52	2034.02	2034.06	-16.64	-0.01693	HCD (High Energy Collision Dissociation)	MS2	0	25	64.8476	58246	MS201900090_4_PKA.raw	F4		9	48	41	102.311	0.001728	0.0417	1.16014e+06	65
		FALSE	High	Mascot (A5)	Unambiguous	[R].IIGLDQVAGmSETALPGAFK.[T]	M10(Oxidation)	1	1	P35579	P35579	0	3	1	0	1	1	678.681	2034.03	2034.06	-13.84	-0.00938	HCD (High Energy Collision Dissociation)	MS2	67.302	25	62.3068	55285	MS201900090_4_PKA.raw	F4		9	48	41	97.4505	0.003313	0.08554	198496	62.33
		FALSE	High	Mascot (A5)	Unambiguous	[R].IIGLDQVAGmSETALPGAFK.[T]	M10(Oxidation)	1	1	P35579	P35579	0	2	1	0	1	1	1017.52	2034.03	2034.06	-14.47	-0.01472	HCD (High Energy Collision Dissociation)	MS2	34.5834	25	65.4028	58884	MS201900090_4_PKA.raw	F4		3	48	41	388.928	0.006384	0.145	1.16014e+06	65
	FALSE	High	[K].MEDSVGCLETAEEVKR.[K]	1xPhospho [S4]; 1xOxidation [M1]	P35579 1xPhospho [S1376]	2.84644e-05	0	1	1	1	P35579	P35579 [1373-1388]	1	1891.78	0	100		High	High	0	1.174e-05	76	28.21	K.MEDSVGCLETAEEVKR.K	[1373-1388]	1xPhospho [S1376]	Used
		Checked	Confidence	Identifying Node	PSM Ambiguity	Annotated Sequence	Modifications	# Protein Groups	# Proteins	Master Protein Accessions	Protein Accessions	# Missed Cleavages	Charge	DeltaScore	DeltaCn	Rank	Search Engine Rank	m/z [Da]	MH+ [Da]	Theo. MH+ [Da]	DeltaM [ppm]	Deltam/z [Da]	Activation Type	MS Order	Isolation Interference [%]	Ion Inject Time [ms]	RT [min]	First Scan	Spectrum File	File ID	Quan Info	Ions Score	Identity Strict	Identity Relaxed	Expectation Value	Percolator q-Value	Percolator PEP	Precursor Abundance	Apex RT [min]
		FALSE	High	Mascot (A5)	Unambiguous	[K].mEDsVGCLETAEEVKR.[K]	M1(Oxidation); S4(Phospho)	1	1	P35579	P35579	1	2	0.75	0	1	1	946.389	1891.77	1891.78	-5.39	-0.0051	HCD (High Energy Collision Dissociation)	MS2	0	25	28.2709	18172	MS201900090_4_PKA.raw	F4		76	48	41	1.79639e-05	0	1.174e-05	1.37969e+06	28.21
	FALSE	High	[K].MQQNIQELEEQLEEEESAR.[Q]	1xAcetyl [N-Term]; 1xOxidation [M1]	P35579 1xAcetyl [N-Term]	1.01539e-09	0	1	1	3	P35579	P35579 [941-959]	0	2391.06	0	100		High	High	0	1.821e-10	115	59.1	K.MQQNIQELEEQLEEEESAR.Q	[941-959]	1xAcetyl [N-Term]	Used
		Checked	Confidence	Identifying Node	PSM Ambiguity	Annotated Sequence	Modifications	# Protein Groups	# Proteins	Master Protein Accessions	Protein Accessions	# Missed Cleavages	Charge	DeltaScore	DeltaCn	Rank	Search Engine Rank	m/z [Da]	MH+ [Da]	Theo. MH+ [Da]	DeltaM [ppm]	Deltam/z [Da]	Activation Type	MS Order	Isolation Interference [%]	Ion Inject Time [ms]	RT [min]	First Scan	Spectrum File	File ID	Quan Info	Ions Score	Identity Strict	Identity Relaxed	Expectation Value	Percolator q-Value	Percolator PEP	Precursor Abundance	Apex RT [min]
		FALSE	High	Mascot (A5)	Unambiguous	[K].mQQNIQELEEQLEEEESAR.[Q]	N-Term(Acetyl); M1(Oxidation)	1	1	P35579	P35579	0	2	0.6889	0	1	1	1196.04	2391.06	2391.06	1.24	0.00148	HCD (High Energy Collision Dissociation)	MS2	57.9558	25	58.9702	51489	MS201900090_4_PKA.raw	F4		90	51	45	1.59051e-06	0	1.748e-09	7.19257e+06	59.1
		FALSE	High	Mascot (A5)	Unambiguous	[K].mQQNIQELEEQLEEEESAR.[Q]	N-Term(Acetyl); M1(Oxidation)	1	1	P35579	P35579	0	2	0.8348	0	1	1	1196.03	2391.06	2391.06	-1.86	-0.00223	HCD (High Energy Collision Dissociation)	MS2	0	25	59.45	51994	MS201900090_4_PKA.raw	F4		115	51	45	5.24628e-09	0	1.821e-10	7.19257e+06	59.1
		FALSE	High	Mascot (A5)	Unambiguous	[K].mQQNIQELEEQLEEEESAR.[Q]	N-Term(Acetyl); M1(Oxidation)	1	1	P35579	P35579	0	2	0.8421	0	1	1	1196.04	2391.07	2391.06	2.6	0.00311	HCD (High Energy Collision Dissociation)	MS2	0	25	59.8122	52427	MS201900090_4_PKA.raw	F4		19	51	45	19.5916	0.001195	0.02568	7.19257e+06	59.1
	FALSE	High	[K].MQQNIQELEEQLEEEESAR.[Q]	1xAcetyl [N-Term]	P35579 1xAcetyl [N-Term]	8.63017e-11	0	1	1	6	P35579	P35579 [941-959]	0	2375.07	0	100		High	High	0	1.258e-11	97	65.33	K.MQQNIQELEEQLEEEESAR.Q	[941-959]	1xAcetyl [N-Term]	Used
		Checked	Confidence	Identifying Node	PSM Ambiguity	Annotated Sequence	Modifications	# Protein Groups	# Proteins	Master Protein Accessions	Protein Accessions	# Missed Cleavages	Charge	DeltaScore	DeltaCn	Rank	Search Engine Rank	m/z [Da]	MH+ [Da]	Theo. MH+ [Da]	DeltaM [ppm]	Deltam/z [Da]	Activation Type	MS Order	Isolation Interference [%]	Ion Inject Time [ms]	RT [min]	First Scan	Spectrum File	File ID	Quan Info	Ions Score	Identity Strict	Identity Relaxed	Expectation Value	Percolator q-Value	Percolator PEP	Precursor Abundance	Apex RT [min]
		FALSE	High	Mascot (A5)	Unambiguous	[K].mQQNIQELEEQLEEEESAR.[Q]	N-Term(Acetyl)	1	1	P35579	P35579	0	2	1	0	1	1	1188.04	2375.06	2375.07	-1.43	-0.0017	HCD (High Energy Collision Dissociation)	MS2	5.8623	25	65.5887	59102	MS201900090_4_PKA.raw	F4		97	51	44	3.18614e-07	0	1.258e-11	4308331	65.33
		FALSE	High	Mascot (A5)	Unambiguous	[K].mQQNIQELEEQLEEEESAR.[Q]	N-Term(Acetyl)	1	1	P35579	P35579	0	2	0.9565	0	1	1	1188.04	2375.07	2375.07	1.61	0.00192	HCD (High Energy Collision Dissociation)	MS2	30.0336	25	58.2286	50651	MS201900090_4_PKA.raw	F4		69	51	44	0.000206859	0	1.271e-09
		FALSE	High	Mascot (A5)	Unambiguous	[K].mQQNIQELEEQLEEEESAR.[Q]	N-Term(Acetyl)	1	1	P35579	P35579	0	2	0.9367	0	1	1	1188.04	2375.07	2375.07	3.16	0.00375	HCD (High Energy Collision Dissociation)	MS2	77.8444	25	66.1052	59710	MS201900090_4_PKA.raw	F4		79	51	44	1.85673e-05	0	1.116e-09	4308331	65.33
		FALSE	High	Mascot (A5)	Unambiguous	[K].mQQNIQELEEQLEEEESAR.[Q]	N-Term(Acetyl)	1	1	P35579	P35579	0	2	1	0	1	1	1188.04	2375.07	2375.07	3.33	0.00396	HCD (High Energy Collision Dissociation)	MS2	28.3381	25	65.1076	58540	MS201900090_4_PKA.raw	F4		93	51	44	7.10932e-07	0	2.449e-09	4308331	65.33
		FALSE	High	Mascot (A5)	Unambiguous	[K].mQQNIQELEEQLEEEESAR.[Q]	N-Term(Acetyl)	1	1	P35579	P35579	0	2	1	0	1	1	1188.04	2375.08	2375.07	3.66	0.00435	HCD (High Energy Collision Dissociation)	MS2	26.9533	25	58.4256	50886	MS201900090_4_PKA.raw	F4		44	51	44	0.0663784	0	7.582e-06
		FALSE	High	Mascot (A5)	Unambiguous	[K].mQQNIQELEEQLEEEESAR.[Q]	N-Term(Acetyl)	1	1	P35579	P35579	0	2	1	0	1	1	1188.03	2375.06	2375.07	-3.41	-0.00405	HCD (High Energy Collision Dissociation)	MS2	0	25	59.573	52140	MS201900090_4_PKA.raw	F4		31	51	44	1.38	0.0007363	0.01148
	FALSE	High	[K].MQQNIQELEEQLEEEESAR.[Q]	1xOxidation [M1]		3.15489e-09	0	1	1	12	P35579	P35579 [941-959]	0	2349.05	0	100		High	High	0	5.45e-09	113	46.91	K.MQQNIQELEEQLEEEESAR.Q	[941-959]		Used
		Checked	Confidence	Identifying Node	PSM Ambiguity	Annotated Sequence	Modifications	# Protein Groups	# Proteins	Master Protein Accessions	Protein Accessions	# Missed Cleavages	Charge	DeltaScore	DeltaCn	Rank	Search Engine Rank	m/z [Da]	MH+ [Da]	Theo. MH+ [Da]	DeltaM [ppm]	Deltam/z [Da]	Activation Type	MS Order	Isolation Interference [%]	Ion Inject Time [ms]	RT [min]	First Scan	Spectrum File	File ID	Quan Info	Ions Score	Identity Strict	Identity Relaxed	Expectation Value	Percolator q-Value	Percolator PEP	Precursor Abundance	Apex RT [min]
		FALSE	High	Mascot (A5)	Unambiguous	[K].mQQNIQELEEQLEEEESAR.[Q]	M1(Oxidation)	1	1	P35579	P35579	0	3	0.7391	0	1	1	783.688	2349.05	2349.05	-0.4	-0.00031	HCD (High Energy Collision Dissociation)	MS2	0	25	47.9741	39512	MS201900090_4_PKA.raw	F4		92	51	44	9.62652e-07	0	3.373e-09	3384717	48
		FALSE	High	Mascot (A5)	Unambiguous	[K].mQQNIQELEEQLEEEESAR.[Q]	M1(Oxidation)	1	1	P35579	P35579	0	3	1	0	1	1	783.688	2349.05	2349.05	-0.37	-0.00029	HCD (High Energy Collision Dissociation)	MS2	41.4642	25	48.4686	40056	MS201900090_4_PKA.raw	F4		17	51	44	27.9547	0	6.942e-06	3384717	48
		FALSE	High	Mascot (A5)	Unambiguous	[K].mQQNIQELEEQLEEEESAR.[Q]	M1(Oxidation)	1	1	P35579	P35579	0	2	0.7788	0	1	1	1175.03	2349.05	2349.05	0.8	0.00094	HCD (High Energy Collision Dissociation)	MS2	2.47539	2.538	47.103	38571	MS201900090_4_PKA.raw	F4		113	51	44	6.9531e-09	0	5.45e-09	185005568	46.91
		FALSE	High	Mascot (A5)	Unambiguous	[K].mQQNIQELEEQLEEEESAR.[Q]	M1(Oxidation)	1	1	P35579	P35579	0	3	0.7407	0	1	1	783.69	2349.05	2349.05	1.41	0.0011	HCD (High Energy Collision Dissociation)	MS2	72.5683	25	49.4737	41208	MS201900090_4_PKA.raw	F4		54	51	44	0.00569473	0	7.909e-08
		FALSE	High	Mascot (A5)	Unambiguous	[K].mQQNIQELEEQLEEEESAR.[Q]	M1(Oxidation)	1	1	P35579	P35579	0	2	1	0	1	1	1175.03	2349.06	2349.05	2.06	0.00242	HCD (High Energy Collision Dissociation)	MS2	66.5642	25	50.8358	42731	MS201900090_4_PKA.raw	F4		66	51	44	0.000342345	0	1.464e-06
		FALSE	High	Mascot (A5)	Unambiguous	[K].mQQNIQELEEQLEEEESAR.[Q]	M1(Oxidation)	1	1	P35579	P35579	0	3	1	0	1	1	783.693	2349.06	2349.05	5.75	0.0045	HCD (High Energy Collision Dissociation)	MS2	62.9346	25	50.4816	42326	MS201900090_4_PKA.raw	F4		13	51	44	82.3634	0	2.161e-05	11969711	50
		FALSE	High	Mascot (A5)	Unambiguous	[K].mQQNIQELEEQLEEEESAR.[Q]	M1(Oxidation)	1	1	P35579	P35579	0	2	0.9027	0	1	1	1175.03	2349.05	2349.05	-1.03	-0.0012	HCD (High Energy Collision Dissociation)	MS2	0	25	49.5759	41317	MS201900090_4_PKA.raw	F4		113	51	44	7.68826e-09	0	6.177e-10	2140608	49.1
		FALSE	High	Mascot (A5)	Unambiguous	[K].mQQNIQELEEQLEEEESAR.[Q]	M1(Oxidation)	1	1	P35579	P35579	0	2	0.7589	0	1	1	1175.03	2349.05	2349.05	-1.06	-0.00125	HCD (High Energy Collision Dissociation)	MS2	9.81545	25	48.9607	40618	MS201900090_4_PKA.raw	F4		112	51	44	1.04951e-08	0	1.854e-09	2140608	49.1
		FALSE	High	Mascot (A5)	Unambiguous	[K].mQQNIQELEEQLEEEESAR.[Q]	M1(Oxidation)	1	1	P35579	P35579	0	2	0.7778	0	1	1	1175.03	2349.04	2349.05	-2.81	-0.0033	HCD (High Energy Collision Dissociation)	MS2	0	25	47.5308	39055	MS201900090_4_PKA.raw	F4		108	51	44	2.2561e-08	0	6.553e-10	7.51216e+06	47.49
		FALSE	High	Mascot (A5)	Unambiguous	[K].mQQNIQELEEQLEEEESAR.[Q]	M1(Oxidation)	1	1	P35579	P35579	0	2	0.8806	0	1	1	1175.02	2349.04	2349.05	-3.8	-0.00446	HCD (High Energy Collision Dissociation)	MS2	59.2217	25	50.066	41845	MS201900090_4_PKA.raw	F4		67	51	44	0.000329444	0	7.318e-08
		FALSE	High	Mascot (A5)	Unambiguous	[K].mQQNIQELEEQLEEEESAR.[Q]	M1(Oxidation)	1	1	P35579	P35579	0	2	0.7568	0	1	1	1175.02	2349.04	2349.05	-3.79	-0.00445	HCD (High Energy Collision Dissociation)	MS2	0	25	46.6334	38037	MS201900090_4_PKA.raw	F4		111	51	44	1.18713e-08	0	3.438e-09	185005568	46.91
		FALSE	High	Mascot (A5)	Unambiguous	[K].mQQNIQELEEQLEEEESAR.[Q]	M1(Oxidation)	1	1	P35579	P35579	0	3	0.92	0	1	1	783.687	2349.05	2349.05	-1.44	-0.00113	HCD (High Energy Collision Dissociation)	MS2	49.3515	20.872	47.4961	39015	MS201900090_4_PKA.raw	F4		50	51	44	0.0152998	0	2.309e-08	135859024	46.91
	FALSE	High	[K].MQQNIQELEEQLEEEESAR.[Q]			6.9409e-10	0	1	1	6	P35579	P35579 [941-959]	0	2333.06	0	100		High	High	0	1.201e-10	158	50	K.MQQNIQELEEQLEEEESAR.Q	[941-959]		Used
		Checked	Confidence	Identifying Node	PSM Ambiguity	Annotated Sequence	Modifications	# Protein Groups	# Proteins	Master Protein Accessions	Protein Accessions	# Missed Cleavages	Charge	DeltaScore	DeltaCn	Rank	Search Engine Rank	m/z [Da]	MH+ [Da]	Theo. MH+ [Da]	DeltaM [ppm]	Deltam/z [Da]	Activation Type	MS Order	Isolation Interference [%]	Ion Inject Time [ms]	RT [min]	First Scan	Spectrum File	File ID	Quan Info	Ions Score	Identity Strict	Identity Relaxed	Expectation Value	Percolator q-Value	Percolator PEP	Precursor Abundance	Apex RT [min]
		FALSE	High	Mascot (A5)	Unambiguous	[K].MQQNIQELEEQLEEEESAR.[Q]		1	1	P35579	P35579	0	2	0.9688	0	1	1	1167.03	2333.05	2333.06	-2.91	-0.0034	HCD (High Energy Collision Dissociation)	MS2	0	25	51.1289	43061	MS201900090_4_PKA.raw	F4		96	51	44	3.80789e-07	0	2.953e-08	140656560	50
		FALSE	High	Mascot (A5)	Unambiguous	[K].MQQNIQELEEQLEEEESAR.[Q]		1	1	P35579	P35579	0	2	0.9203	0	1	1	1167.03	2333.05	2333.06	-2.19	-0.00256	HCD (High Energy Collision Dissociation)	MS2	0	25	50.9151	42813	MS201900090_4_PKA.raw	F4		138	51	44	2.18603e-11	0	4.765e-10	140656560	50
		FALSE	High	Mascot (A5)	Unambiguous	[K].MQQNIQELEEQLEEEESAR.[Q]		1	1	P35579	P35579	0	2	0.9747	0	1	1	1167.03	2333.05	2333.06	-0.65	-0.00076	HCD (High Energy Collision Dissociation)	MS2	0	25	50.3999	42227	MS201900090_4_PKA.raw	F4		158	51	44	2.3623e-13	0	1.201e-10	140656560	50
		FALSE	High	Mascot (A5)	Unambiguous	[K].MQQNIQELEEQLEEEESAR.[Q]		1	1	P35579	P35579	0	2	0.9649	0	1	1	1167.04	2333.06	2333.06	3.19	0.00373	HCD (High Energy Collision Dissociation)	MS2	0	6.362	49.9133	41680	MS201900090_4_PKA.raw	F4		114	51	44	5.66177e-09	0	3.378e-08	140656560	50
		FALSE	High	Mascot (A5)	Unambiguous	[K].MQQNIQELEEQLEEEESAR.[Q]		1	1	P35579	P35579	0	3	0.9574	0	1	1	778.362	2333.07	2333.06	6.18	0.0048	HCD (High Energy Collision Dissociation)	MS2	75.3624	25	52.7594	44811	MS201900090_4_PKA.raw	F4		47	51	44	0.0258549	0	7.275e-06	264079	53.17
		FALSE	High	Mascot (A5)	Unambiguous	[K].MQQNIQELEEQLEEEESAR.[Q]		1	1	P35579	P35579	0	3	0.9643	0	1	1	778.354	2333.05	2333.06	-3.97	-0.00309	HCD (High Energy Collision Dissociation)	MS2	47.5955	25	47.9797	39519	MS201900090_4_PKA.raw	F4		28	51	44	2.31286	8.015e-05	0.0002337	962181	47.95
	FALSE	High	[K].LTKDFSALESQLQDTQELLQEENR.[Q]	1xAcetyl [N-Term]; 1xAcetyl [K3]	P35579 1xAcetyl [K1301]; 1xAcetyl [N-Term]	5.15267e-05	0	1	1	2	P35579	P35579 [1299-1322]	1	2877.41	0	100		High	High	8.015e-05	3.412e-05	75	69.83	K.LTKDFSALESQLQDTQELLQEENR.Q	[1299-1322]	1xAcetyl [K1301]; 1xAcetyl [N-Term]	Used
		Checked	Confidence	Identifying Node	PSM Ambiguity	Annotated Sequence	Modifications	# Protein Groups	# Proteins	Master Protein Accessions	Protein Accessions	# Missed Cleavages	Charge	DeltaScore	DeltaCn	Rank	Search Engine Rank	m/z [Da]	MH+ [Da]	Theo. MH+ [Da]	DeltaM [ppm]	Deltam/z [Da]	Activation Type	MS Order	Isolation Interference [%]	Ion Inject Time [ms]	RT [min]	First Scan	Spectrum File	File ID	Quan Info	Ions Score	Identity Strict	Identity Relaxed	Expectation Value	Percolator q-Value	Percolator PEP	Precursor Abundance	Apex RT [min]
		FALSE	High	Mascot (A5)	Unambiguous	[K].lTKDFSALESQLQDTQELLQEENR.[Q]	N-Term(Acetyl)	1	1	P35579	P35579	1	3	0.9467	0	1	2	959.821	2877.45	2877.41	12.77	0.01224	HCD (High Energy Collision Dissociation)	MS2	0	25	69.7652	63951	MS201900090_4_PKA.raw	F4		75	49	42	3.01007e-05	0	2.217e-05	474879	69.83
		FALSE	High	Mascot (A5)	Unambiguous	[K].LTkDFSALESQLQDTQELLQEENR.[Q]	K3(Acetyl)	1	1	P35579	P35579	1	3	0.9467	0	1	1	959.821	2877.45	2877.41	12.77	0.01224	HCD (High Energy Collision Dissociation)	MS2	0	25	69.7652	63951	MS201900090_4_PKA.raw	F4		75	49	42	3.01007e-05	8.015e-05	3.412e-05	474879	69.83
	FALSE	High	[K].LTKDFSALESQLQDTQELLQEENR.[Q]			1.03971e-06	0	1	1	3	P35579	P35579 [1299-1322]	1	2835.4	0	100		High	High	0	3.259e-07	45	66.02	K.LTKDFSALESQLQDTQELLQEENR.Q	[1299-1322]		Used
		Checked	Confidence	Identifying Node	PSM Ambiguity	Annotated Sequence	Modifications	# Protein Groups	# Proteins	Master Protein Accessions	Protein Accessions	# Missed Cleavages	Charge	DeltaScore	DeltaCn	Rank	Search Engine Rank	m/z [Da]	MH+ [Da]	Theo. MH+ [Da]	DeltaM [ppm]	Deltam/z [Da]	Activation Type	MS Order	Isolation Interference [%]	Ion Inject Time [ms]	RT [min]	First Scan	Spectrum File	File ID	Quan Info	Ions Score	Identity Strict	Identity Relaxed	Expectation Value	Percolator q-Value	Percolator PEP	Precursor Abundance	Apex RT [min]
		FALSE	High	Mascot (A5)	Unambiguous	[K].LTKDFSALESQLQDTQELLQEENR.[Q]		1	1	P35579	P35579	1	3	0.9545	0	1	1	945.805	2835.4	2835.4	-0.16	-0.00015	HCD (High Energy Collision Dissociation)	MS2	0	25	57.9116	50296	MS201900090_4_PKA.raw	F4		44	50	43	0.0445229	0	6.672e-06	1.44909e+06	57.97
		FALSE	High	Mascot (A5)	Unambiguous	[K].LTKDFSALESQLQDTQELLQEENR.[Q]		1	1	P35579	P35579	1	3	1	0	1	1	945.805	2835.4	2835.4	-0.28	-0.00026	HCD (High Energy Collision Dissociation)	MS2	23.0727	25	65.9828	59570	MS201900090_4_PKA.raw	F4		45	50	43	0.0343144	0	3.259e-07	2.1778e+06	66.02
		FALSE	High	Mascot (A5)	Unambiguous	[K].LTKDFSALESQLQDTQELLQEENR.[Q]		1	1	P35579	P35579	1	3	0.9091	0	1	1	945.789	2835.35	2835.4	-17.12	-0.01618	HCD (High Energy Collision Dissociation)	MS2	24.7341	25	62.8925	55960	MS201900090_4_PKA.raw	F4		22	51	44	10.5108	0.004805	0.1105	378044	62.82
	FALSE	High	[R].LTEMETLQSQLMAEK.[L]	1xAcetyl [N-Term]; 2xOxidation [M4; M12]	P35579 1xAcetyl [N-Term]	2.43781e-06	0	1	1	4	P35579	P35579 [868-882]	0	1825.86	0	100		High	High	0	8.207e-07	62	34.13	R.LTEMETLQSQLMAEK.L	[868-882]	1xAcetyl [N-Term]	Used
		Checked	Confidence	Identifying Node	PSM Ambiguity	Annotated Sequence	Modifications	# Protein Groups	# Proteins	Master Protein Accessions	Protein Accessions	# Missed Cleavages	Charge	DeltaScore	DeltaCn	Rank	Search Engine Rank	m/z [Da]	MH+ [Da]	Theo. MH+ [Da]	DeltaM [ppm]	Deltam/z [Da]	Activation Type	MS Order	Isolation Interference [%]	Ion Inject Time [ms]	RT [min]	First Scan	Spectrum File	File ID	Quan Info	Ions Score	Identity Strict	Identity Relaxed	Expectation Value	Percolator q-Value	Percolator PEP	Precursor Abundance	Apex RT [min]
		FALSE	High	Mascot (A5)	Unambiguous	[R].lTEmETLQSQLmAEK.[L]	N-Term(Acetyl); M4(Oxidation); M12(Oxidation)	1	1	P35579	P35579	0	2	1	0	1	1	913.431	1825.85	1825.86	-0.96	-0.00088	HCD (High Energy Collision Dissociation)	MS2	56.2122	25	33.8932	23869	MS201900090_4_PKA.raw	F4		36	49	42	0.213664	0	1.636e-05	4869756	34.13
		FALSE	High	Mascot (A5)	Unambiguous	[R].lTEmETLQSQLmAEK.[L]	N-Term(Acetyl); M4(Oxidation); M12(Oxidation)	1	1	P35579	P35579	0	2	1	0	1	1	913.43	1825.85	1825.86	-1.37	-0.00125	HCD (High Energy Collision Dissociation)	MS2	0	25	36.5206	26803	MS201900090_4_PKA.raw	F4		62	49	42	0.000581312	0	8.207e-07
		FALSE	High	Mascot (A5)	Unambiguous	[R].lTEmETLQSQLmAEK.[L]	N-Term(Acetyl); M4(Oxidation); M12(Oxidation)	1	1	P35579	P35579	0	2	1	0	1	1	913.429	1825.85	1825.86	-2.63	-0.0024	HCD (High Energy Collision Dissociation)	MS2	37.9862	25	34.225	24226	MS201900090_4_PKA.raw	F4		27	49	42	1.78091	0	1.288e-05	4869756	34.13
		FALSE	High	Mascot (A5)	Unambiguous	[R].lTEmETLQSQLmAEK.[L]	N-Term(Acetyl); M4(Oxidation); M12(Oxidation)	1	1	P35579	P35579	0	2	1	0	1	1	913.431	1825.86	1825.86	-0.42	-0.00039	HCD (High Energy Collision Dissociation)	MS2		25	34.3509	24375	MS201900090_4_PKA.raw	F4		10	49	42	81.9013	8.015e-05	0.0006161	4869756	34.13
	FALSE	High	[R].LTEMETLQSQLMAEK.[L]	1xAcetyl [N-Term]; 1xOxidation [M]	P35579 1xAcetyl [N-Term]	8.7452e-09	0	1	1	3	P35579	P35579 [868-882]	0	1809.86	0	100		High	High	0	1.865e-09	67	39.97	R.LTEMETLQSQLMAEK.L	[868-882]	1xAcetyl [N-Term]	Used
		Checked	Confidence	Identifying Node	PSM Ambiguity	Annotated Sequence	Modifications	# Protein Groups	# Proteins	Master Protein Accessions	Protein Accessions	# Missed Cleavages	Charge	DeltaScore	DeltaCn	Rank	Search Engine Rank	m/z [Da]	MH+ [Da]	Theo. MH+ [Da]	DeltaM [ppm]	Deltam/z [Da]	Activation Type	MS Order	Isolation Interference [%]	Ion Inject Time [ms]	RT [min]	First Scan	Spectrum File	File ID	Quan Info	Ions Score	Identity Strict	Identity Relaxed	Expectation Value	Percolator q-Value	Percolator PEP	Precursor Abundance	Apex RT [min]
		FALSE	High	Mascot (A5)	Unambiguous	[R].lTEMETLQSQLmAEK.[L]	N-Term(Acetyl); M12(Oxidation)	1	1	P35579	P35579	0	2	0.9254	0	1	1	905.432	1809.86	1809.86	-2.34	-0.00212	HCD (High Energy Collision Dissociation)	MS2	13.599	25	46.4168	37783	MS201900090_4_PKA.raw	F4		67	49	42	0.000179953	0	1.865e-09	3975156	46.57
		FALSE	High	Mascot (A5)	Unambiguous	[R].lTEmETLQSQLMAEK.[L]	N-Term(Acetyl); M4(Oxidation)	1	1	P35579	P35579	0	2	1	0	1	1	905.435	1809.86	1809.86	1.16	0.00105	HCD (High Energy Collision Dissociation)	MS2	8.65781	19.651	39.8916	30645	MS201900090_4_PKA.raw	F4		27	49	42	1.5019	0	1.023e-05	7598664	39.97
		FALSE	High	Mascot (A5)	Unambiguous	[R].lTEmETLQSQLMAEK.[L]	N-Term(Acetyl); M4(Oxidation)	1	1	P35579	P35579	0	2	0.8182	0	1	1	905.434	1809.86	1809.86	0.04	4e-05	HCD (High Energy Collision Dissociation)	MS2	8.26777	25	42.9528	34090	MS201900090_4_PKA.raw	F4		11	49	42	65.4991	8.015e-05	0.0001829	2.98854e+06	42.71
	FALSE	High	[R].LTEMETLQSQLMAEK.[L]	2xOxidation [M4; M12]		2.81697e-06	0	1	1	18	P35579	P35579 [868-882]	0	1783.85	0	100		High	High	0	9.629e-07	72	28.19	R.LTEMETLQSQLMAEK.L	[868-882]		Used
		Checked	Confidence	Identifying Node	PSM Ambiguity	Annotated Sequence	Modifications	# Protein Groups	# Proteins	Master Protein Accessions	Protein Accessions	# Missed Cleavages	Charge	DeltaScore	DeltaCn	Rank	Search Engine Rank	m/z [Da]	MH+ [Da]	Theo. MH+ [Da]	DeltaM [ppm]	Deltam/z [Da]	Activation Type	MS Order	Isolation Interference [%]	Ion Inject Time [ms]	RT [min]	First Scan	Spectrum File	File ID	Quan Info	Ions Score	Identity Strict	Identity Relaxed	Expectation Value	Percolator q-Value	Percolator PEP	Precursor Abundance	Apex RT [min]
		FALSE	High	Mascot (A5)	Unambiguous	[R].LTEmETLQSQLmAEK.[L]	M4(Oxidation); M12(Oxidation)	1	1	P35579	P35579	0	2	1	0	1	1	892.429	1783.85	1783.85	2.65	0.00237	HCD (High Energy Collision Dissociation)	MS2	2.56747	5.503	28.7249	18666	MS201900090_4_PKA.raw	F4		33	49	42	0.365094	0	3.106e-05	54997144	28.51
		FALSE	High	Mascot (A5)	Unambiguous	[R].LTEmETLQSQLmAEK.[L]	M4(Oxidation); M12(Oxidation)	1	1	P35579	P35579	0	2	1	0	1	1	892.428	1783.85	1783.85	1.72	0.00154	HCD (High Energy Collision Dissociation)	MS2	8.34305	25	31.2936	21470	MS201900090_4_PKA.raw	F4		44	49	42	0.0327375	0	1.789e-05	6.53385e+06	31.02
		FALSE	High	Mascot (A5)	Unambiguous	[R].LTEmETLQSQLmAEK.[L]	M4(Oxidation); M12(Oxidation)	1	1	P35579	P35579	0	2	1	0	1	1	892.427	1783.85	1783.85	1.19	0.00106	HCD (High Energy Collision Dissociation)	MS2	0.261299	1.02	28.261	18162	MS201900090_4_PKA.raw	F4		57	49	42	0.00180622	0	2.638e-05	195196576	28.19
		FALSE	High	Mascot (A5)	Unambiguous	[R].LTEmETLQSQLmAEK.[L]	M4(Oxidation); M12(Oxidation)	1	1	P35579	P35579	0	2	0.8205	0	1	1	892.427	1783.85	1783.85	1.08	0.00096	HCD (High Energy Collision Dissociation)	MS2	21.0212	22.413	30.8099	20964	MS201900090_4_PKA.raw	F4		39	49	42	0.0998368	0	2.63e-06	6845540	30.83
		FALSE	High	Mascot (A5)	Unambiguous	[R].LTEmETLQSQLmAEK.[L]	M4(Oxidation); M12(Oxidation)	1	1	P35579	P35579	0	2	0.9861	0	1	1	892.427	1783.85	1783.85	0.83	0.00074	HCD (High Energy Collision Dissociation)	MS2	0.573857	2.093	27.7959	17648	MS201900090_4_PKA.raw	F4		72	49	42	5.68169e-05	0	9.629e-07	178042688	27.86
		FALSE	High	Mascot (A5)	Unambiguous	[R].LTEmETLQSQLmAEK.[L]	M4(Oxidation); M12(Oxidation)	1	1	P35579	P35579	0	2	1	0	1	1	892.426	1783.84	1783.85	-0.24	-0.00021	HCD (High Energy Collision Dissociation)	MS2	7.59532	25	33.0082	23121	MS201900090_4_PKA.raw	F4		22	49	42	5.70449	8.015e-05	9.167e-05
		FALSE	High	Mascot (A5)	Unambiguous	[R].LTEmETLQSQLmAEK.[L]	M4(Oxidation); M12(Oxidation)	1	1	P35579	P35579	0	2	0.8936	0	1	1	892.427	1783.85	1783.85	0.43	0.00038	HCD (High Energy Collision Dissociation)	MS2	0	25	29.2224	19226	MS201900090_4_PKA.raw	F4		47	49	42	0.0156669	8.015e-05	5.339e-05	54997144	28.51
		FALSE	High	Mascot (A5)	Unambiguous	[R].LTEmETLQSQLmAEK.[L]	M4(Oxidation); M12(Oxidation)	1	1	P35579	P35579	0	2	1	0	1	1	892.428	1783.85	1783.85	2.46	0.0022	HCD (High Energy Collision Dissociation)	MS2	4.21185	19.065	30.0594	20151	MS201900090_4_PKA.raw	F4		28	49	42	1.31566	8.015e-05	3.202e-05	13824724	30.53
		FALSE	High	Mascot (A5)	Unambiguous	[R].LTEmETLQSQLmAEK.[L]	M4(Oxidation); M12(Oxidation)	1	1	P35579	P35579	0	2	1	0	1	1	892.429	1783.85	1783.85	2.71	0.00242	HCD (High Energy Collision Dissociation)	MS2	30.1969	25	36.7009	27012	MS201900090_4_PKA.raw	F4		25	49	42	2.79497	8.015e-05	0.0001907
		FALSE	High	Mascot (A5)	Unambiguous	[R].LTEmETLQSQLmAEK.[L]	M4(Oxidation); M12(Oxidation)	1	1	P35579	P35579	0	2	0.8478	0	1	1	892.429	1783.85	1783.85	3.03	0.00271	HCD (High Energy Collision Dissociation)	MS2	0	25	31.4351	21626	MS201900090_4_PKA.raw	F4		46	49	42	0.0198717	8.015e-05	0.0001013	6.53385e+06	31.02
		FALSE	High	Mascot (A5)	Unambiguous	[R].LTEmETLQSQLmAEK.[L]	M4(Oxidation); M12(Oxidation)	1	1	P35579	P35579	0	2	1	0	1	1	892.426	1783.84	1783.85	-0.33	-0.00029	HCD (High Energy Collision Dissociation)	MS2	56.8368	24.644	32.5054	22557	MS201900090_4_PKA.raw	F4		1	49	42	629.325	0.0002495	0.004471
		FALSE	High	Mascot (A5)	Unambiguous	[R].LTEmETLQSQLmAEK.[L]	M4(Oxidation); M12(Oxidation)	1	1	P35579	P35579	0	2	1	0	1	1	892.427	1783.85	1783.85	1.01	0.0009	HCD (High Energy Collision Dissociation)	MS2		25	33.7315	23699	MS201900090_4_PKA.raw	F4	Not Reliable	24	49	42	3.12442	0.0002495	0.005473
		FALSE	High	Mascot (A5)	Unambiguous	[R].LTEmETLQSQLmAEK.[L]	M4(Oxidation); M12(Oxidation)	1	1	P35579	P35579	0	2	1	0	1	1	892.424	1783.84	1783.85	-2.27	-0.00203	HCD (High Energy Collision Dissociation)	MS2	48.8746	25	35.0183	25141	MS201900090_4_PKA.raw	F4		3	49	42	372.691	0.0002495	0.003728
		FALSE	High	Mascot (A5)	Unambiguous	[R].LTEmETLQSQLmAEK.[L]	M4(Oxidation); M12(Oxidation)	1	1	P35579	P35579	0	2	1	0	1	1	892.43	1783.85	1783.85	4.34	0.00387	HCD (High Energy Collision Dissociation)	MS2	24.1749	18.939	30.506	20648	MS201900090_4_PKA.raw	F4		2	49	42	494.091	0.001443	0.0282	13824724	30.53
		FALSE	High	Mascot (A5)	Unambiguous	[R].LTEmETLQSQLmAEK.[L]	M4(Oxidation); M12(Oxidation)	1	1	P35579	P35579	0	2		0	1	1	892.424	1783.84	1783.85	-2.75	-0.00245	HCD (High Energy Collision Dissociation)	MS2	47.8631	25	37.9279	28383	MS201900090_4_PKA.raw	F4		0	49	42	770.485	0.001486	0.03268	886902	37.44
		FALSE	High	Mascot (A5)	Unambiguous	[R].LTEmETLQSQLmAEK.[L]	M4(Oxidation); M12(Oxidation)	1	1	P35579	P35579	0	2	0.6	0	1	1	892.423	1783.84	1783.85	-3.74	-0.00333	HCD (High Energy Collision Dissociation)	MS2	0	25	38.7811	29377	MS201900090_4_PKA.raw	F4	Not Reliable	5	49	42	249.245	0.001584	0.03793
		FALSE	High	Mascot (A5)	Unambiguous	[R].LTEmETLQSQLmAEK.[L]	M4(Oxidation); M12(Oxidation)	1	1	P35579	P35579	0	2	1	0	1	1	892.431	1783.85	1783.85	5.45	0.00487	HCD (High Energy Collision Dissociation)	MS2	35.2968	25	35.2348	25378	MS201900090_4_PKA.raw	F4		1	49	42	575.278	0.002559	0.06012	1.4874e+06	35.15
		FALSE	High	Mascot (A5)	Unambiguous	[R].LTEmETLQSQLmAEK.[L]	M4(Oxidation); M12(Oxidation)	1	1	P35579	P35579	0	2	1	0	1	1	892.434	1783.86	1783.85	8.19	0.0073	HCD (High Energy Collision Dissociation)	MS2	28.9725	25	38.6404	29214	MS201900090_4_PKA.raw	F4	Not Reliable	3	48	41	423.342	0.006761	0.153
	FALSE	High	[R].LTEMETLQSQLMAEK.[L]	1xOxidation [M]		3.61081e-07	0	1	1	16	P35579	P35579 [868-882]	0	1767.85	0	100		High	High	0	1.039e-07	98	37.48	R.LTEMETLQSQLMAEK.L	[868-882]		Used
		Checked	Confidence	Identifying Node	PSM Ambiguity	Annotated Sequence	Modifications	# Protein Groups	# Proteins	Master Protein Accessions	Protein Accessions	# Missed Cleavages	Charge	DeltaScore	DeltaCn	Rank	Search Engine Rank	m/z [Da]	MH+ [Da]	Theo. MH+ [Da]	DeltaM [ppm]	Deltam/z [Da]	Activation Type	MS Order	Isolation Interference [%]	Ion Inject Time [ms]	RT [min]	First Scan	Spectrum File	File ID	Quan Info	Ions Score	Identity Strict	Identity Relaxed	Expectation Value	Percolator q-Value	Percolator PEP	Precursor Abundance	Apex RT [min]
		FALSE	High	Mascot (A5)	Unambiguous	[R].LTEmETLQSQLMAEK.[L]	M4(Oxidation)	1	1	P35579	P35579	0	2	0.8421	0	1	1	884.432	1767.86	1767.85	4.07	0.0036	HCD (High Energy Collision Dissociation)	MS2	0	22.421	36.5513	26829	MS201900090_4_PKA.raw	F4		38	48	41	0.13515	0	1.277e-05	27021284	36.21
		FALSE	High	Mascot (A5)	Unambiguous	[R].LTEMETLQSQLmAEK.[L]	M12(Oxidation)	1	1	P35579	P35579	0	2	0.5263	0	1	1	884.432	1767.86	1767.85	3.41	0.00301	HCD (High Energy Collision Dissociation)	MS2	0	25	39.4654	30152	MS201900090_4_PKA.raw	F4		57	48	41	0.00166388	0	1.287e-05	19520354	39
		FALSE	High	Mascot (A5)	Unambiguous	[R].LTEmETLQSQLMAEK.[L]	M4(Oxidation)	1	1	P35579	P35579	0	2	0.9	0	1	1	884.432	1767.86	1767.85	3.07	0.00271	HCD (High Energy Collision Dissociation)	MS2	0	25	36.9867	27314	MS201900090_4_PKA.raw	F4		70	48	41	7.91406e-05	0	1.717e-05	175958800	37.48
		FALSE	High	Mascot (A5)	Unambiguous	[R].LTEMETLQSQLmAEK.[L]	M12(Oxidation)	1	1	P35579	P35579	0	2	1	0	1	1	884.431	1767.85	1767.85	2.27	0.002	HCD (High Energy Collision Dissociation)	MS2		25	43.39	34595	MS201900090_4_PKA.raw	F4		17	48	42	17.4857	0	3.086e-05	1.62209e+06	43.71
		FALSE	High	Mascot (A5)	Unambiguous	[R].LTEMETLQSQLmAEK.[L]	M12(Oxidation)	1	1	P35579	P35579	0	2	0.6333	0	1	1	884.43	1767.85	1767.85	0.89	0.00079	HCD (High Energy Collision Dissociation)	MS2	0	25	38.0237	28499	MS201900090_4_PKA.raw	F4		60	48	42	0.000711437	0	3.096e-06	175958800	37.48
		FALSE	High	Mascot (A5)	Unambiguous	[R].LTEmETLQSQLMAEK.[L]	M4(Oxidation)	1	1	P35579	P35579	0	2	0.9024	0	1	1	884.43	1767.85	1767.85	0.83	0.00074	HCD (High Energy Collision Dissociation)	MS2	25.8841	25	34.9102	25022	MS201900090_4_PKA.raw	F4		41	48	41	0.0588487	0	8.435e-06	15919326	35.57
		FALSE	High	Mascot (A5)	Unambiguous	[R].LTEMETLQSQLmAEK.[L]	M12(Oxidation)	1	1	P35579	P35579	0	2	0.9275	0	1	1	884.429	1767.85	1767.85	0.75	0.00066	HCD (High Energy Collision Dissociation)	MS2	0.280985	1.525	37.4527	27839	MS201900090_4_PKA.raw	F4		69	48	41	9.08517e-05	0	6.175e-06	175958800	37.48
		FALSE	High	Mascot (A5)	Unambiguous	[R].LTEmETLQSQLMAEK.[L]	M4(Oxidation)	1	1	P35579	P35579	0	2	0.9898	0	1	1	884.428	1767.85	1767.85	-0.84	-0.00074	HCD (High Energy Collision Dissociation)	MS2	0	1.858	33.174	23266	MS201900090_4_PKA.raw	F4		98	49	42	1.15649e-07	0	1.039e-07	163766992	33.22
		FALSE	High	Mascot (A5)	Unambiguous	[R].LTEMETLQSQLmAEK.[L]	M12(Oxidation)	1	1	P35579	P35579	0	2	0.3333	0	1	1	884.427	1767.85	1767.85	-1.58	-0.00139	HCD (High Energy Collision Dissociation)	MS2	0	25	40.1581	30956	MS201900090_4_PKA.raw	F4		18	49	42	12.7203	8.015e-05	0.0001471	19520354	39
		FALSE	High	Mascot (A5)	Unambiguous	[R].LTEmETLQSQLMAEK.[L]	M4(Oxidation)	1	1	P35579	P35579	0	2	0.6897	0	1	1	884.432	1767.86	1767.85	3.51	0.00311	HCD (High Energy Collision Dissociation)	MS2	51.9451	25	35.3188	25480	MS201900090_4_PKA.raw	F4		29	48	41	1.0143	8.015e-05	0.000106	15919326	35.57
		FALSE	High	Mascot (A5)	Unambiguous	[R].LTEmETLQSQLMAEK.[L]	M4(Oxidation)	1	1	P35579	P35579	0	2	1	0	1	1	884.434	1767.86	1767.85	6	0.0053	HCD (High Energy Collision Dissociation)	MS2	27.4486	25	35.3466	25511	MS201900090_4_PKA.raw	F4		34	48	41	0.325929	8.015e-05	4.003e-05	15919326	35.57
		FALSE	High	Mascot (A5)	Unambiguous	[R].LTEmETLQSQLMAEK.[L]	M4(Oxidation)	1	1	P35579	P35579	0	2	0.9211	0	1	1	884.437	1767.87	1767.85	9.12	0.00806	HCD (High Energy Collision Dissociation)	MS2	22.7921	25	34.7711	24858	MS201900090_4_PKA.raw	F4	Not Reliable	38	48	41	0.124448	8.015e-05	0.0002376
		FALSE	High	Mascot (A5)	Unambiguous	[R].LTEmETLQSQLMAEK.[L]	M4(Oxidation)	1	1	P35579	P35579	0	2	0.1111	0	1	1	884.43	1767.85	1767.85	0.98	0.00086	HCD (High Energy Collision Dissociation)	MS2	39.4687	25	41.9946	33039	MS201900090_4_PKA.raw	F4	Not Reliable	18	48	42	11.8188	0.0001341	0.0009782
		FALSE	High	Mascot (A5)	Unambiguous	[R].LTEmETLQSQLMAEK.[L]	M4(Oxidation)	1	1	P35579	P35579	0	3	1	0	1	1	589.954	1767.85	1767.85	-2.11	-0.00124	HCD (High Energy Collision Dissociation)	MS2	42.4206	25	32.7442	22829	MS201900090_4_PKA.raw	F4		21	49	42	6.49296	0.0001341	0.001263
		FALSE	High	Mascot (A5)	Unambiguous	[R].LTEMETLQSQLmAEK.[L]	M12(Oxidation)	1	1	P35579	P35579	0	2	0.5	0	1	1	884.425	1767.84	1767.85	-4.68	-0.00414	HCD (High Energy Collision Dissociation)	MS2	35.8231	25	42.8541	33980	MS201900090_4_PKA.raw	F4	Not Reliable	14	49	42	30.9188	0.0001341	0.001051
		FALSE	High	Mascot (A5)	Unambiguous	[R].LTEmETLQSQLMAEK.[L]	M4(Oxidation)	1	1	P35579	P35579	0	2	0.6471	0	1	1	884.429	1767.85	1767.85	-0.28	-0.00025	HCD (High Energy Collision Dissociation)	MS2	64.6498	25	41.5099	32493	MS201900090_4_PKA.raw	F4		17	49	42	14.366	0.0004105	0.008389
	FALSE	High	[R].LTEMETLQSQLMAEK.[L]			2.19583e-08	0	1	1	12	P35579	P35579 [868-882]	0	1751.86	1	100		High	High	0	5.019e-09	81	43.66	R.LTEMETLQSQLMAEK.L	[868-882]		Used
		Checked	Confidence	Identifying Node	PSM Ambiguity	Annotated Sequence	Modifications	# Protein Groups	# Proteins	Master Protein Accessions	Protein Accessions	# Missed Cleavages	Charge	DeltaScore	DeltaCn	Rank	Search Engine Rank	m/z [Da]	MH+ [Da]	Theo. MH+ [Da]	DeltaM [ppm]	Deltam/z [Da]	Activation Type	MS Order	Isolation Interference [%]	Ion Inject Time [ms]	RT [min]	First Scan	Spectrum File	File ID	Quan Info	Ions Score	Identity Strict	Identity Relaxed	Expectation Value	Percolator q-Value	Percolator PEP	Precursor Abundance	Apex RT [min]
		FALSE	High	Mascot (A5)	Unambiguous	[R].LTEMETLQSQLMAEK.[L]		1	1	P35579	P35579	0	2	0.8861	0	1	1	876.432	1751.86	1751.86	0.74	0.00065	HCD (High Energy Collision Dissociation)	MS2	2.86919	25	44.3981	35721	MS201900090_4_PKA.raw	F4		79	48	41	9.56913e-06	0	1.352e-07	412695776	43.66
		FALSE	High	Mascot (A5)	Unambiguous	[R].LTEMETLQSQLMAEK.[L]		1	1	P35579	P35579	0	2	0.8987	0	1	1	876.432	1751.86	1751.86	0.34	0.00029	HCD (High Energy Collision Dissociation)	MS2	1.70306	3.469	43.9091	35186	MS201900090_4_PKA.raw	F4		79	48	41	9.49693e-06	0	5.612e-07	412695776	43.66
		FALSE	High	Mascot (A5)	Unambiguous	[R].LTEMETLQSQLMAEK.[L]		1	1	P35579	P35579	0	2	0.963	0	1	1	876.431	1751.86	1751.86	-0.06	-6e-05	HCD (High Energy Collision Dissociation)	MS2	37.1308	25	43.4286	34642	MS201900090_4_PKA.raw	F4		81	48	41	6.008e-06	0	5.019e-09	412695776	43.66
		FALSE	High	Mascot (A5)	Unambiguous	[R].LTEMETLQSQLMAEK.[L]		1	1	P35579	P35579	0	2	0.9861	0	1	1	876.43	1751.85	1751.86	-1.19	-0.00105	HCD (High Energy Collision Dissociation)	MS2	0	25	45.9579	37264	MS201900090_4_PKA.raw	F4		72	48	41	4.80484e-05	0	1.167e-07	1.36151e+06	46.22
		FALSE	High	Mascot (A5)	Unambiguous	[R].LTEMETLQSQLMAEK.[L]		1	1	P35579	P35579	0	2	0.8305	0	1	1	876.429	1751.85	1751.86	-2.25	-0.00197	HCD (High Energy Collision Dissociation)	MS2	0	25	45.438	36682	MS201900090_4_PKA.raw	F4		59	48	41	0.0010011	0	5.339e-07	1.3669e+06	45.53
		FALSE	High	Mascot (A5)	Unambiguous	[R].LTEMETLQSQLMAEK.[L]		1	1	P35579	P35579	0	2	0.537	0	1	1	876.427	1751.85	1751.86	-4.56	-0.00399	HCD (High Energy Collision Dissociation)	MS2	0	25	44.8299	36193	MS201900090_4_PKA.raw	F4		54	48	41	0.00297456	0	5.337e-08	4700182	44.83
		FALSE	High	Mascot (A5)	Unambiguous	[R].LTEMETLQSQLMAEK.[L]		1	1	P35579	P35579	0	2	0.8857	0	1	1	876.424	1751.84	1751.86	-8.53	-0.00747	HCD (High Energy Collision Dissociation)	MS2	44.5448	25	47.2219	38703	MS201900090_4_PKA.raw	F4		35	49	42	0.227389	0	1.126e-05
		FALSE	High	Mascot (A5)	Unambiguous	[R].LTEMETLQSQLMAEK.[L]		1	1	P35579	P35579	0	2	0.9412	0	1	1	876.432	1751.86	1751.86	1.06	0.00093	HCD (High Energy Collision Dissociation)	MS2	0	25	46.5814	37975	MS201900090_4_PKA.raw	F4		51	48	41	0.00578821	0	2.774e-06	1.36151e+06	46.22
		FALSE	High	Mascot (A5)	Unambiguous	[R].LTEMETLQSQLMAEK.[L]		1	1	P35579	P35579	0	2	0.6765	0	1	1	876.433	1751.86	1751.86	1.64	0.00144	HCD (High Energy Collision Dissociation)	MS2	0	25	49.4527	41184	MS201900090_4_PKA.raw	F4		34	48	41	0.28042	8.015e-05	0.00064
		FALSE	High	Mascot (A5)	Unambiguous	[R].LTEMETLQSQLMAEK.[L]		1	1	P35579	P35579	0	2	1	0	1	1	876.433	1751.86	1751.86	1.73	0.00151	HCD (High Energy Collision Dissociation)	MS2	78.6479	25	48.5829	40184	MS201900090_4_PKA.raw	F4		1	48	41	582.803	0.0001341	0.001314
		FALSE	High	Mascot (A5)	Unambiguous	[R].LTEMETLQSQLMAEK.[L]		1	1	P35579	P35579	0	2	1	0	1	1	876.425	1751.84	1751.86	-6.71	-0.00588	HCD (High Energy Collision Dissociation)	MS2	46.6332	25	41.2284	32167	MS201900090_4_PKA.raw	F4	Not Reliable	22	49	42	4.76801	0.0001341	0.0009521
		FALSE	High	Mascot (A5)	Unambiguous	[R].LTEMETLQSQLMAEK.[L]		1	1	P35579	P35579	0	2	0.375	0	1	1	876.428	1751.85	1751.86	-4.01	-0.00351	HCD (High Energy Collision Dissociation)	MS2	40.0876	25	50.4846	42330	MS201900090_4_PKA.raw	F4		8	48	41	127.617	0.005223	0.1206	466749	50.09
	FALSE	High	[R].LTEMETLQSQLMAEK.[L]	1xAcetyl [N-Term]	P35579 1xAcetyl [N-Term]	1.71791e-06	0	1	1	2	P35579	P35579 [868-882]	0	1793.87	0		No Quan Values	High	High	0	1.566e-06	47		R.LTEMETLQSQLMAEK.L	[868-882]	1xAcetyl [N-Term]	Not Used
		Checked	Confidence	Identifying Node	PSM Ambiguity	Annotated Sequence	Modifications	# Protein Groups	# Proteins	Master Protein Accessions	Protein Accessions	# Missed Cleavages	Charge	DeltaScore	DeltaCn	Rank	Search Engine Rank	m/z [Da]	MH+ [Da]	Theo. MH+ [Da]	DeltaM [ppm]	Deltam/z [Da]	Activation Type	MS Order	Isolation Interference [%]	Ion Inject Time [ms]	RT [min]	First Scan	Spectrum File	File ID	Quan Info	Ions Score	Identity Strict	Identity Relaxed	Expectation Value	Percolator q-Value	Percolator PEP	Precursor Abundance	Apex RT [min]
		FALSE	High	Mascot (A5)	Unambiguous	[R].lTEMETLQSQLMAEK.[L]	N-Term(Acetyl)	1	1	P35579	P35579	0	2	1	0	1	1	897.434	1793.86	1793.87	-3.18	-0.00285	HCD (High Energy Collision Dissociation)	MS2	36.8086	25	54.4461	46702	MS201900090_4_PKA.raw	F4		45	49	42	0.0279301	0	5.641e-07
		FALSE	High	Mascot (A5)	Unambiguous	[R].lTEMETLQSQLMAEK.[L]	N-Term(Acetyl)	1	1	P35579	P35579	0	2	1	0	1	1	897.436	1793.86	1793.87	-1.21	-0.00109	HCD (High Energy Collision Dissociation)	MS2	7.56109	25	53.9777	46186	MS201900090_4_PKA.raw	F4		47	49	42	0.0161194	0	1.566e-06
	FALSE	High	[R].HEMPPHIYAITDTAYR.[S]	1xAcetyl [N-Term]; 1xOxidation [M3]	P35579 1xAcetyl [N-Term]	2.2874e-07	0	1	1	4	P35579	P35579 [144-159]	0	1972.92	0	100		High	High	0	6.353e-08	65	30.62	R.HEMPPHIYAITDTAYR.S	[144-159]	1xAcetyl [N-Term]	Used
		Checked	Confidence	Identifying Node	PSM Ambiguity	Annotated Sequence	Modifications	# Protein Groups	# Proteins	Master Protein Accessions	Protein Accessions	# Missed Cleavages	Charge	DeltaScore	DeltaCn	Rank	Search Engine Rank	m/z [Da]	MH+ [Da]	Theo. MH+ [Da]	DeltaM [ppm]	Deltam/z [Da]	Activation Type	MS Order	Isolation Interference [%]	Ion Inject Time [ms]	RT [min]	First Scan	Spectrum File	File ID	Quan Info	Ions Score	Identity Strict	Identity Relaxed	Expectation Value	Percolator q-Value	Percolator PEP	Precursor Abundance	Apex RT [min]
		FALSE	High	Mascot (A5)	Unambiguous	[R].hEmPPHIYAITDTAYR.[S]	N-Term(Acetyl); M3(Oxidation)	1	1	P35579	P35579	0	3	1	0	1	1	658.312	1972.92	1972.92	-0.57	-0.00037	HCD (High Energy Collision Dissociation)	MS2	44.6321	25	28.0951	17972	MS201900090_4_PKA.raw	F4		34	50	43	0.455918	0	8.405e-07	973701	28.13
		FALSE	High	Mascot (A5)	Unambiguous	[R].hEmPPHIYAITDTAYR.[S]	N-Term(Acetyl); M3(Oxidation)	1	1	P35579	P35579	0	2	1	0	1	1	986.963	1972.92	1972.92	-1.97	-0.00194	HCD (High Energy Collision Dissociation)	MS2	54.1379	25	30.4046	20540	MS201900090_4_PKA.raw	F4		65	50	43	0.000364211	0	6.353e-08
		FALSE	High	Mascot (A5)	Unambiguous	[R].hEmPPHIYAITDTAYR.[S]	N-Term(Acetyl); M3(Oxidation)	1	1	P35579	P35579	0	3	1	0	1	1	658.312	1972.92	1972.92	-0.87	-0.00057	HCD (High Energy Collision Dissociation)	MS2	53.3096	25	30.7573	20904	MS201900090_4_PKA.raw	F4		27	50	43	2.09912	0	3.304e-06	3.43702e+06	30.62
		FALSE	High	Mascot (A5)	Unambiguous	[R].hEmPPHIYAITDTAYR.[S]	N-Term(Acetyl); M3(Oxidation)	1	1	P35579	P35579	0	3	0.9643	0	1	1	658.313	1972.92	1972.92	1.28	0.00084	HCD (High Energy Collision Dissociation)	MS2	27.3406	25	27.9605	17829	MS201900090_4_PKA.raw	F4		28	50	43	1.6309	8.015e-05	0.0002285	973701	28.13
	FALSE	High	[R].HEMPPHIYAITDTAYR.[S]	1xOxidation [M3]		8.61313e-09	0	1	1	9	P35579	P35579 [144-159]	0	1930.91	0	100		High	High	0	4.336e-08	59	23.56	R.HEMPPHIYAITDTAYR.S	[144-159]		Used
		Checked	Confidence	Identifying Node	PSM Ambiguity	Annotated Sequence	Modifications	# Protein Groups	# Proteins	Master Protein Accessions	Protein Accessions	# Missed Cleavages	Charge	DeltaScore	DeltaCn	Rank	Search Engine Rank	m/z [Da]	MH+ [Da]	Theo. MH+ [Da]	DeltaM [ppm]	Deltam/z [Da]	Activation Type	MS Order	Isolation Interference [%]	Ion Inject Time [ms]	RT [min]	First Scan	Spectrum File	File ID	Quan Info	Ions Score	Identity Strict	Identity Relaxed	Expectation Value	Percolator q-Value	Percolator PEP	Precursor Abundance	Apex RT [min]
		FALSE	High	Mascot (A5)	Unambiguous	[R].HEmPPHIYAITDTAYR.[S]	M3(Oxidation)	1	1	P35579	P35579	0	3	0.8814	0	1	1	644.308	1930.91	1930.91	-0.74	-0.00048	HCD (High Energy Collision Dissociation)	MS2	2.59608	3.401	23.6786	13474	MS201900090_4_PKA.raw	F4		59	50	43	0.00114991	0	4.336e-08	83730640	23.56
		FALSE	High	Mascot (A5)	Unambiguous	[R].HEmPPHIYAITDTAYR.[S]	M3(Oxidation)	1	1	P35579	P35579	0	3	0.9167	0	1	1	644.308	1930.91	1930.91	-0.38	-0.00025	HCD (High Energy Collision Dissociation)	MS2	32.4226	14.302	24.1173	13925	MS201900090_4_PKA.raw	F4		48	50	43	0.0175839	0	8.967e-08	83730640	23.56
		FALSE	High	Mascot (A5)	Unambiguous	[R].HEmPPHIYAITDTAYR.[S]	M3(Oxidation)	1	1	P35579	P35579	0	3	1	0	1	1	644.31	1930.91	1930.91	1.27	0.00082	HCD (High Energy Collision Dissociation)	MS2	67.3811	25	23.2363	13053	MS201900090_4_PKA.raw	F4		44	50	43	0.0364115	0	1.829e-09	83730640	23.56
		FALSE	High	Mascot (A5)	Unambiguous	[R].HEmPPHIYAITDTAYR.[S]	M3(Oxidation)	1	1	P35579	P35579	0	3	1	0	1	1	644.31	1930.92	1930.91	2.07	0.00133	HCD (High Energy Collision Dissociation)	MS2	39.7149	25	24.6294	14406	MS201900090_4_PKA.raw	F4		54	50	43	0.00392979	0	4.5e-09	2.96966e+06	24.67
		FALSE	High	Mascot (A5)	Unambiguous	[R].HEmPPHIYAITDTAYR.[S]	M3(Oxidation)	1	1	P35579	P35579	0	3	1	0	1	1	644.308	1930.91	1930.91	-0.97	-0.00063	HCD (High Energy Collision Dissociation)	MS2	73.8833	25	25.8848	15508	MS201900090_4_PKA.raw	F4		30	50	43	0.900943	0	2.111e-05
		FALSE	High	Mascot (A5)	Unambiguous	[R].HEmPPHIYAITDTAYR.[S]	M3(Oxidation)	1	1	P35579	P35579	0	3	0.6667	0	1	1	644.308	1930.91	1930.91	-0.34	-0.00022	HCD (High Energy Collision Dissociation)	MS2	85.8308	25	23.1523	12966	MS201900090_4_PKA.raw	F4		3	50	43	535.567	8.015e-05	0.000121	83730640	23.56
		FALSE	High	Mascot (A5)	Unambiguous	[R].HEmPPHIYAITDTAYR.[S]	M3(Oxidation)	1	1	P35579	P35579	0	3	1	0	1	1	644.31	1930.92	1930.91	1.78	0.00115	HCD (High Energy Collision Dissociation)	MS2	14.5668	25	24.9731	14691	MS201900090_4_PKA.raw	F4		18	50	43	16.1507	8.015e-05	5.277e-05	2.96966e+06	24.67
		FALSE	High	Mascot (A5)	Unambiguous	[R].HEmPPHIYAITDTAYR.[S]	M3(Oxidation)	1	1	P35579	P35579	0	3	0.3333	0	1	1	644.307	1930.91	1930.91	-2.11	-0.00136	HCD (High Energy Collision Dissociation)	MS2	87.0826	22.323	25.1346	14857	MS201900090_4_PKA.raw	F4		3	50	43	491.512	8.015e-05	9.11e-05	2.96966e+06	24.67
		FALSE	High	Mascot (A5)	Unambiguous	[R].HEmPPHIYAITDTAYR.[S]	M3(Oxidation)	1	1	P35579	P35579	0	3	1	0	1	1	644.309	1930.91	1930.91	0.96	0.00062	HCD (High Energy Collision Dissociation)	MS2	57.2347	25	27.486	17301	MS201900090_4_PKA.raw	F4		10	49	43	92.7805	0.0004105	0.007314
	FALSE	High	[R].HEMPPHIYAITDTAYR.[S]			4.04395e-10	0	1	1	7	P35579	P35579 [144-159]	0	1914.92	0	100		High	High	0	6.714e-11	78	26.69	R.HEMPPHIYAITDTAYR.S	[144-159]		Used
		Checked	Confidence	Identifying Node	PSM Ambiguity	Annotated Sequence	Modifications	# Protein Groups	# Proteins	Master Protein Accessions	Protein Accessions	# Missed Cleavages	Charge	DeltaScore	DeltaCn	Rank	Search Engine Rank	m/z [Da]	MH+ [Da]	Theo. MH+ [Da]	DeltaM [ppm]	Deltam/z [Da]	Activation Type	MS Order	Isolation Interference [%]	Ion Inject Time [ms]	RT [min]	First Scan	Spectrum File	File ID	Quan Info	Ions Score	Identity Strict	Identity Relaxed	Expectation Value	Percolator q-Value	Percolator PEP	Precursor Abundance	Apex RT [min]
		FALSE	High	Mascot (A5)	Unambiguous	[R].HEMPPHIYAITDTAYR.[S]		1	1	P35579	P35579	0	3	0.8718	0	1	1	638.977	1914.92	1914.92	0.51	0.00033	HCD (High Energy Collision Dissociation)	MS2	3.36831	13.2	26.6088	16318	MS201900090_4_PKA.raw	F4		78	49	42	1.46451e-05	0	4.988e-10	13324144	26.69
		FALSE	High	Mascot (A5)	Unambiguous	[R].HEMPPHIYAITDTAYR.[S]		1	1	P35579	P35579	0	3	0.8718	0	1	1	638.977	1914.92	1914.92	0.18	0.00012	HCD (High Energy Collision Dissociation)	MS2	21.3309	25	28.0791	17951	MS201900090_4_PKA.raw	F4		78	49	42	1.64427e-05	0	1.754e-09	13324144	26.69
		FALSE	High	Mascot (A5)	Unambiguous	[R].HEMPPHIYAITDTAYR.[S]		1	1	P35579	P35579	0	3	0.859	0	1	1	638.977	1914.92	1914.92	0.15	9e-05	HCD (High Energy Collision Dissociation)	MS2	10.4774	12.991	27.1206	16883	MS201900090_4_PKA.raw	F4		78	49	42	1.55654e-05	0	7.264e-11	13324144	26.69
		FALSE	High	Mascot (A5)	Unambiguous	[R].HEMPPHIYAITDTAYR.[S]		1	1	P35579	P35579	0	3	0.8462	0	1	1	638.977	1914.92	1914.92	-0.16	-0.0001	HCD (High Energy Collision Dissociation)	MS2	82.5249	25	26.1406	15800	MS201900090_4_PKA.raw	F4		26	49	42	2.18163	0	3.769e-06	13324144	26.69
		FALSE	High	Mascot (A5)	Unambiguous	[R].HEMPPHIYAITDTAYR.[S]		1	1	P35579	P35579	0	3	1	0	1	1	638.976	1914.91	1914.92	-1.8	-0.00115	HCD (High Energy Collision Dissociation)	MS2	50.002	25	28.5309	18443	MS201900090_4_PKA.raw	F4		26	49	42	2.21555	0	4.864e-07
		FALSE	High	Mascot (A5)	Unambiguous	[R].HEMPPHIYAITDTAYR.[S]		1	1	P35579	P35579	0	3	0.859	0	1	1	638.977	1914.92	1914.92	0.54	0.00035	HCD (High Energy Collision Dissociation)	MS2	0	19.122	27.5741	17391	MS201900090_4_PKA.raw	F4		78	49	42	1.38853e-05	0	6.714e-11	13324144	26.69
		FALSE	High	Mascot (A5)	Unambiguous	[R].HEMPPHIYAITDTAYR.[S]		1	1	P35579	P35579	0	3	1	0	1	1	638.985	1914.94	1914.92	13.11	0.00837	HCD (High Energy Collision Dissociation)	MS2	72.5048	25	30.0118	20095	MS201900090_4_PKA.raw	F4		1	49	42	628.739	0.0002495	0.003583
	FALSE	High	[K].HEAMITDLEER.[L]	1xAcetyl [N-Term]	P35579 1xAcetyl [N-Term]	4.51495e-06	0	1	1	1	P35579	P35579 [1025-1035]	0	1385.64	0		No Quan Values	High	High	0	1.593e-06	37		K.HEAMITDLEER.L	[1025-1035]	1xAcetyl [N-Term]	Not Used
		Checked	Confidence	Identifying Node	PSM Ambiguity	Annotated Sequence	Modifications	# Protein Groups	# Proteins	Master Protein Accessions	Protein Accessions	# Missed Cleavages	Charge	DeltaScore	DeltaCn	Rank	Search Engine Rank	m/z [Da]	MH+ [Da]	Theo. MH+ [Da]	DeltaM [ppm]	Deltam/z [Da]	Activation Type	MS Order	Isolation Interference [%]	Ion Inject Time [ms]	RT [min]	First Scan	Spectrum File	File ID	Quan Info	Ions Score	Identity Strict	Identity Relaxed	Expectation Value	Percolator q-Value	Percolator PEP	Precursor Abundance	Apex RT [min]
		FALSE	High	Mascot (A5)	Unambiguous	[K].hEAMITDLEER.[L]	N-Term(Acetyl)	1	1	P35579	P35579	0	2	1	0	1	1	693.322	1385.64	1385.64	-0.2	-0.00014	HCD (High Energy Collision Dissociation)	MS2		25	31.0314	21190	MS201900090_4_PKA.raw	F4		37	47	40	0.103438	0	1.593e-06
	FALSE	High	[K].HEAMITDLEER.[L]			2.88201e-06	0	1	1	3	P35579	P35579 [1025-1035]	0	1343.63	0	100		High	High	0	9.827e-07	63	20.93	K.HEAMITDLEER.L	[1025-1035]		Used
		Checked	Confidence	Identifying Node	PSM Ambiguity	Annotated Sequence	Modifications	# Protein Groups	# Proteins	Master Protein Accessions	Protein Accessions	# Missed Cleavages	Charge	DeltaScore	DeltaCn	Rank	Search Engine Rank	m/z [Da]	MH+ [Da]	Theo. MH+ [Da]	DeltaM [ppm]	Deltam/z [Da]	Activation Type	MS Order	Isolation Interference [%]	Ion Inject Time [ms]	RT [min]	First Scan	Spectrum File	File ID	Quan Info	Ions Score	Identity Strict	Identity Relaxed	Expectation Value	Percolator q-Value	Percolator PEP	Precursor Abundance	Apex RT [min]
		FALSE	High	Mascot (A5)	Unambiguous	[K].HEAMITDLEER.[L]		1	1	P35579	P35579	0	2	0.9804	0	1	1	672.318	1343.63	1343.63	1.94	0.0013	HCD (High Energy Collision Dissociation)	MS2	0	25	21.3031	10867	MS201900090_4_PKA.raw	F4		51	46	39	0.00393632	0	5.467e-06	110401992	20.93
		FALSE	High	Mascot (A5)	Unambiguous	[K].HEAMITDLEER.[L]		1	1	P35579	P35579	0	2	0.9206	0	1	1	672.317	1343.63	1343.63	-0.21	-0.00014	HCD (High Energy Collision Dissociation)	MS2	13.1872	25	20.7919	10296	MS201900090_4_PKA.raw	F4		63	46	39	0.000272866	0	9.827e-07	110401992	20.93
		FALSE	High	Mascot (A5)	Unambiguous	[K].HEAMITDLEER.[L]		1	1	P35579	P35579	0	2	1	0	1	1	672.313	1343.62	1343.63	-5.63	-0.00379	HCD (High Energy Collision Dissociation)	MS2	59.0564	25	21.7916	11418	MS201900090_4_PKA.raw	F4		22	46	39	2.63057	8.015e-05	4.705e-05	110401992	20.93
	FALSE	High	[K].HEAMITDLEER.[L]	1xOxidation [M4]		7.05324e-07	0	1	1	5	P35579	P35579 [1025-1035]	0	1359.62	0	100		High	High	0	2.138e-07	56	17.07	K.HEAMITDLEER.L	[1025-1035]		Used
		Checked	Confidence	Identifying Node	PSM Ambiguity	Annotated Sequence	Modifications	# Protein Groups	# Proteins	Master Protein Accessions	Protein Accessions	# Missed Cleavages	Charge	DeltaScore	DeltaCn	Rank	Search Engine Rank	m/z [Da]	MH+ [Da]	Theo. MH+ [Da]	DeltaM [ppm]	Deltam/z [Da]	Activation Type	MS Order	Isolation Interference [%]	Ion Inject Time [ms]	RT [min]	First Scan	Spectrum File	File ID	Quan Info	Ions Score	Identity Strict	Identity Relaxed	Expectation Value	Percolator q-Value	Percolator PEP	Precursor Abundance	Apex RT [min]
		FALSE	High	Mascot (A5)	Unambiguous	[K].HEAmITDLEER.[L]	M4(Oxidation)	1	1	P35579	P35579	0	2	0.7027	0	1	1	680.316	1359.62	1359.62	2.9	0.00197	HCD (High Energy Collision Dissociation)	MS2	50.8464	25	19.7495	9116	MS201900090_4_PKA.raw	F4		37	46	39	0.0851442	0	6.557e-06
		FALSE	High	Mascot (A5)	Unambiguous	[K].HEAmITDLEER.[L]	M4(Oxidation)	1	1	P35579	P35579	0	2	0.9524	0	1	1	680.315	1359.62	1359.62	0.78	0.00053	HCD (High Energy Collision Dissociation)	MS2	24.0844	25	18.8929	8343	MS201900090_4_PKA.raw	F4		42	46	39	0.0293912	0	3.43e-07	146817104	17.07
		FALSE	High	Mascot (A5)	Unambiguous	[K].HEAmITDLEER.[L]	M4(Oxidation)	1	1	P35579	P35579	0	2	0.8909	0	1	1	680.314	1359.62	1359.62	0.51	0.00034	HCD (High Energy Collision Dissociation)	MS2	0	13.872	16.9798	6251	MS201900090_4_PKA.raw	F4		55	46	39	0.00161982	0	3.883e-06	146817104	17.07
		FALSE	High	Mascot (A5)	Unambiguous	[K].HEAmITDLEER.[L]	M4(Oxidation)	1	1	P35579	P35579	0	2	0.9286	0	1	1	680.314	1359.62	1359.62	0.16	0.00011	HCD (High Energy Collision Dissociation)	MS2	15.7322	4.997	17.452	6746	MS201900090_4_PKA.raw	F4		56	46	39	0.00112444	0	2.138e-07	146817104	17.07
		FALSE	High	Mascot (A5)	Unambiguous	[K].HEAmITDLEER.[L]	M4(Oxidation)	1	1	P35579	P35579	0	2	0.9286	0	1	1	680.314	1359.62	1359.62	-0.37	-0.00025	HCD (High Energy Collision Dissociation)	MS2	0	25	18.427	7827	MS201900090_4_PKA.raw	F4		42	46	39	0.0328832	0	4.602e-06	146817104	17.07
	FALSE	High	[K].FVSELWKDVDR.[I]			2.0212e-05	0	1	1	1	P35579	P35579 [607-617]	1	1393.71	0	100		High	High	0	8.064e-06	79	34.87	K.FVSELWKDVDR.I	[607-617]		Used
		Checked	Confidence	Identifying Node	PSM Ambiguity	Annotated Sequence	Modifications	# Protein Groups	# Proteins	Master Protein Accessions	Protein Accessions	# Missed Cleavages	Charge	DeltaScore	DeltaCn	Rank	Search Engine Rank	m/z [Da]	MH+ [Da]	Theo. MH+ [Da]	DeltaM [ppm]	Deltam/z [Da]	Activation Type	MS Order	Isolation Interference [%]	Ion Inject Time [ms]	RT [min]	First Scan	Spectrum File	File ID	Quan Info	Ions Score	Identity Strict	Identity Relaxed	Expectation Value	Percolator q-Value	Percolator PEP	Precursor Abundance	Apex RT [min]
		FALSE	High	Mascot (A5)	Unambiguous	[K].FVSELWKDVDR.[I]		1	1	P35579	P35579	1	3	0.6582	0	1	1	465.242	1393.71	1393.71	-0.74	-0.00034	HCD (High Energy Collision Dissociation)	MS2	15.1943	25	34.8235	24923	MS201900090_4_PKA.raw	F4		79	46	39	5.82252e-06	0	8.064e-06	1.6575e+06	34.87
	FALSE	High	[K].LDPHLVLDQLR.[C]	1xAcetyl [N-Term]	P35580 1xAcetyl [N-Term]; P35579 1xAcetyl [N-Term]	6.2624e-06	0	2	2	6	P35580; P35579	P35580 [690-700]; P35579 [683-693]	0	1360.76	0	100	Shared	High	High	0	5.389e-06	38	51.37	K.LDPHLVLDQLR.C	[683-693]	1xAcetyl [N-Term]	Used
		Checked	Confidence	Identifying Node	PSM Ambiguity	Annotated Sequence	Modifications	# Protein Groups	# Proteins	Master Protein Accessions	Protein Accessions	# Missed Cleavages	Charge	DeltaScore	DeltaCn	Rank	Search Engine Rank	m/z [Da]	MH+ [Da]	Theo. MH+ [Da]	DeltaM [ppm]	Deltam/z [Da]	Activation Type	MS Order	Isolation Interference [%]	Ion Inject Time [ms]	RT [min]	First Scan	Spectrum File	File ID	Quan Info	Ions Score	Identity Strict	Identity Relaxed	Expectation Value	Percolator q-Value	Percolator PEP	Precursor Abundance	Apex RT [min]
		FALSE	High	Mascot (A5)	Unambiguous	[K].lDPHLVLDQLR.[C]	N-Term(Acetyl)	2	2	P35580; P35579	P35580; P35579	0	2	0.7895	0	1	1	680.883	1360.76	1360.76	0.46	0.00031	HCD (High Energy Collision Dissociation)	MS2	12.4175	25	51.633	43597	MS201900090_4_PKA.raw	F4		38	44	37	0.0413827	0	5.389e-06	4.34264e+06	51.37
		FALSE	High	Mascot (A5)	Unambiguous	[K].lDPHLVLDQLR.[C]	N-Term(Acetyl)	2	2	P35580; P35579	P35580; P35579	0	3	0.8378	0	1	1	454.257	1360.76	1360.76	-0.84	-0.00038	HCD (High Energy Collision Dissociation)	MS2	0	25	51.3338	43279	MS201900090_4_PKA.raw	F4		37	44	37	0.0529842	0	2.277e-06	758038	51.43
		FALSE	High	Mascot (A5)	Unambiguous	[K].lDPHLVLDQLR.[C]	N-Term(Acetyl)	2	2	P35580; P35579	P35580; P35579	0	2	0.7143	0	1	1	680.882	1360.76	1360.76	-0.96	-0.00065	HCD (High Energy Collision Dissociation)	MS2	0	25	56.3933	48692	MS201900090_4_PKA.raw	F4		35	44	37	0.0916874	8.015e-05	0.0001983	1.6976e+06	56.47
		FALSE	High	Mascot (A5)	Unambiguous	[K].lDPHLVLDQLR.[C]	N-Term(Acetyl)	2	2	P35580; P35579	P35580; P35579	0	2	1	0	1	1	680.882	1360.76	1360.76	-0.91	-0.00062	HCD (High Energy Collision Dissociation)	MS2	53.8033	25	51.169	43108	MS201900090_4_PKA.raw	F4		21	44	37	2.13457	0.0001341	0.002843	4.34264e+06	51.37
		FALSE	High	Mascot (A5)	Unambiguous	[K].lDPHLVLDQLR.[C]	N-Term(Acetyl)	2	2	P35580; P35579	P35580; P35579	0	2	1	0	1	1	680.88	1360.75	1360.76	-4.63	-0.00315	HCD (High Energy Collision Dissociation)	MS2	68.4713	25	52.1086	44098	MS201900090_4_PKA.raw	F4		11	44	37	21.4059	0.0003658	0.006896	4.34264e+06	51.37
		FALSE	High	Mascot (A5)	Unambiguous	[K].lDPHLVLDQLR.[C]	N-Term(Acetyl)	2	2	P35580; P35579	P35580; P35579	0	2	1	0	1	1	680.888	1360.77	1360.76	7.1	0.00483	HCD (High Energy Collision Dissociation)	MS2	56.4084	25	57.1012	49420	MS201900090_4_PKA.raw	F4		12	43	36	13.7258	0.003178	0.07897
	FALSE	High	[K].LDPHLVLDQLR.[C]			2.06786e-05	0	2	2	11	P35580; P35579	P35580 [690-700]; P35579 [683-693]	0	1318.75	0	100	Shared	High	High	8.015e-05	0.0005927	46	40.32	K.LDPHLVLDQLR.C	[683-693]		Used
		Checked	Confidence	Identifying Node	PSM Ambiguity	Annotated Sequence	Modifications	# Protein Groups	# Proteins	Master Protein Accessions	Protein Accessions	# Missed Cleavages	Charge	DeltaScore	DeltaCn	Rank	Search Engine Rank	m/z [Da]	MH+ [Da]	Theo. MH+ [Da]	DeltaM [ppm]	Deltam/z [Da]	Activation Type	MS Order	Isolation Interference [%]	Ion Inject Time [ms]	RT [min]	First Scan	Spectrum File	File ID	Quan Info	Ions Score	Identity Strict	Identity Relaxed	Expectation Value	Percolator q-Value	Percolator PEP	Precursor Abundance	Apex RT [min]
		FALSE	High	Mascot (A5)	Unambiguous	[K].LDPHLVLDQLR.[C]		2	2	P35580; P35579	P35580; P35579	0	2	0.8205	0	1	1	659.878	1318.75	1318.75	-0.03	-2e-05	HCD (High Energy Collision Dissociation)	MS2	47.9041	25	42.8029	33917	MS201900090_4_PKA.raw	F4		39	43	36	0.022579	0	8.304e-06	2357588	42.19
		FALSE	High	Mascot (A5)	Unambiguous	[K].LDPHLVLDQLR.[C]		2	2	P35580; P35579	P35580; P35579	0	2	0.8421	0	1	1	659.879	1318.75	1318.75	1.58	0.00104	HCD (High Energy Collision Dissociation)	MS2	32.475	25	42.2956	33343	MS201900090_4_PKA.raw	F4		38	42	35	0.0287114	8.015e-05	7.983e-05	2357588	42.19
		FALSE	High	Mascot (A5)	Unambiguous	[K].LDPHLVLDQLR.[C]		2	2	P35580; P35579	P35580; P35579	0	2	0.7826	0	1	1	659.878	1318.75	1318.75	0.85	0.00056	HCD (High Energy Collision Dissociation)	MS2	0	0.395	40.43	31250	MS201900090_4_PKA.raw	F4		46	42	35	0.0047965	8.015e-05	0.0005927	1133748864	40.32
		FALSE	High	Mascot (A5)	Unambiguous	[K].LDPHLVLDQLR.[C]		2	2	P35580; P35579	P35580; P35579	0	2	0.7692	0	1	1	659.877	1318.75	1318.75	-1.15	-0.00076	HCD (High Energy Collision Dissociation)	MS2	7.37231	25	41.8376	32864	MS201900090_4_PKA.raw	F4		39	42	35	0.0239133	8.015e-05	0.0001202	1133748864	40.32
		FALSE	High	Mascot (A5)	Unambiguous	[K].LDPHLVLDQLR.[C]		2	2	P35580; P35579	P35580; P35579	0	2	0.9429	0	1	1	659.877	1318.75	1318.75	-1.26	-0.00083	HCD (High Energy Collision Dissociation)	MS2	0	25	43.3036	34501	MS201900090_4_PKA.raw	F4		35	42	35	0.0616085	8.015e-05	0.0002221
		FALSE	High	Mascot (A5)	Unambiguous	[K].LDPHLVLDQLR.[C]		2	2	P35580; P35579	P35580; P35579	0	2	0.8378	0	1	1	659.876	1318.74	1318.75	-2.96	-0.00195	HCD (High Energy Collision Dissociation)	MS2	17.0327	25	41.3626	32330	MS201900090_4_PKA.raw	F4		37	43	36	0.0376763	8.015e-05	9.359e-05	1133748864	40.32
		FALSE	High	Mascot (A5)	Unambiguous	[K].LDPHLVLDQLR.[C]		2	2	P35580; P35579	P35580; P35579	0	2	1	0	1	1	659.877	1318.75	1318.75	-0.98	-0.00065	HCD (High Energy Collision Dissociation)	MS2	49.8372	25	46.6489	38057	MS201900090_4_PKA.raw	F4		20	42	35	1.88062	0.0001341	0.002439	403927	46.68
		FALSE	High	Mascot (A5)	Unambiguous	[K].LDPHLVLDQLR.[C]		2	2	P35580; P35579	P35580; P35579	0	2	1	0	1	1	659.877	1318.75	1318.75	-0.76	-0.0005	HCD (High Energy Collision Dissociation)	MS2	83.3989	16.331	40.0041	30780	MS201900090_4_PKA.raw	F4		10	43	36	19.3372	0.0001341	0.001831	1133748864	40.32
		FALSE	High	Mascot (A5)	Unambiguous	[K].LDPHLVLDQLR.[C]		2	2	P35580; P35579	P35580; P35579	0	2	1	0	1	1	659.877	1318.75	1318.75	-0.13	-8e-05	HCD (High Energy Collision Dissociation)	MS2	18.8272	16.019	40.8989	31781	MS201900090_4_PKA.raw	F4		10	43	36	21.0755	0.0001341	0.001617	1133748864	40.32
		FALSE	High	Mascot (A5)	Unambiguous	[K].LDPHLVLDQLR.[C]		2	2	P35580; P35579	P35580; P35579	0	2	1	0	1	1	659.874	1318.74	1318.75	-4.63	-0.00305	HCD (High Energy Collision Dissociation)	MS2	62.6215	25	44.3277	35648	MS201900090_4_PKA.raw	F4		12	43	36	13.1144	0.0002495	0.005308	924272	44.18
		FALSE	High	Mascot (A5)	Unambiguous	[K].LDPHLVLDQLR.[C]		2	2	P35580; P35579	P35580; P35579	0	2	1	0	1	1	659.877	1318.75	1318.75	-0.49	-0.00032	HCD (High Energy Collision Dissociation)	MS2	91.1344	25	47.169	38651	MS201900090_4_PKA.raw	F4		5	43	36	68.42	0.001104	0.01994	403927	46.68
	FALSE	High	[K].IAQLEEQLDNETKER.[Q]	1xAcetyl [N-Term]	P35579 1xAcetyl [N-Term]	2.00987e-07	0	1	1	3	P35579	P35579 [1816-1830]	1	1857.92	0	100		High	High	0	5.533e-08	94	39.62	K.IAQLEEQLDNETKER.Q	[1816-1830]	1xAcetyl [N-Term]	Used
		Checked	Confidence	Identifying Node	PSM Ambiguity	Annotated Sequence	Modifications	# Protein Groups	# Proteins	Master Protein Accessions	Protein Accessions	# Missed Cleavages	Charge	DeltaScore	DeltaCn	Rank	Search Engine Rank	m/z [Da]	MH+ [Da]	Theo. MH+ [Da]	DeltaM [ppm]	Deltam/z [Da]	Activation Type	MS Order	Isolation Interference [%]	Ion Inject Time [ms]	RT [min]	First Scan	Spectrum File	File ID	Quan Info	Ions Score	Identity Strict	Identity Relaxed	Expectation Value	Percolator q-Value	Percolator PEP	Precursor Abundance	Apex RT [min]
		FALSE	High	Mascot (A5)	Unambiguous	[K].iAQLEEQLDNETKER.[Q]	N-Term(Acetyl)	1	1	P35579	P35579	1	2	0.9753	0	1	1	929.464	1857.92	1857.92	0.93	0.00087	HCD (High Energy Collision Dissociation)	MS2	0	25	39.4935	30185	MS201900090_4_PKA.raw	F4		81	48	41	6.27706e-06	0	7.007e-08	2.66789e+06	39.62
		FALSE	High	Mascot (A5)	Unambiguous	[K].iAQLEEQLDNETKER.[Q]	N-Term(Acetyl)	1	1	P35579	P35579	1	2	0.9787	0	1	1	929.46	1857.91	1857.92	-3.6	-0.00334	HCD (High Energy Collision Dissociation)	MS2	0	25	39.4806	30171	MS201900090_4_PKA.raw	F4		94	49	42	3.56839e-07	0	5.533e-08	2.66789e+06	39.62
		FALSE	High	Mascot (A5)	Unambiguous	[K].iAQLEEQLDNETKER.[Q]	N-Term(Acetyl)	1	1	P35579	P35579	1	2	1	0	1	1	929.47	1857.93	1857.92	7.23	0.00672	HCD (High Energy Collision Dissociation)	MS2	24.9881	25	29.918	19997	MS201900090_4_PKA.raw	F4	Not Reliable	10	48	41	72.771	0.009494	0.203
	FALSE	High	[K].IAQLEEQLDNETKER.[Q]			1.94962e-07	0	1	1	3	P35579	P35579 [1816-1830]	1	1815.91	0	100		High	High	0	5.326e-08	90	23.52	K.IAQLEEQLDNETKER.Q	[1816-1830]		Used
		Checked	Confidence	Identifying Node	PSM Ambiguity	Annotated Sequence	Modifications	# Protein Groups	# Proteins	Master Protein Accessions	Protein Accessions	# Missed Cleavages	Charge	DeltaScore	DeltaCn	Rank	Search Engine Rank	m/z [Da]	MH+ [Da]	Theo. MH+ [Da]	DeltaM [ppm]	Deltam/z [Da]	Activation Type	MS Order	Isolation Interference [%]	Ion Inject Time [ms]	RT [min]	First Scan	Spectrum File	File ID	Quan Info	Ions Score	Identity Strict	Identity Relaxed	Expectation Value	Percolator q-Value	Percolator PEP	Precursor Abundance	Apex RT [min]
		FALSE	High	Mascot (A5)	Unambiguous	[K].IAQLEEQLDNETKER.[Q]		1	1	P35579	P35579	1	2	0.9667	0	1	1	908.46	1815.91	1815.91	1.97	0.00179	HCD (High Energy Collision Dissociation)	MS2	0	19.735	23.8132	13615	MS201900090_4_PKA.raw	F4		90	48	41	7.20755e-07	0	5.326e-08	303652064	23.52
		FALSE	High	Mascot (A5)	Unambiguous	[K].IAQLEEQLDNETKER.[Q]		1	1	P35579	P35579	1	3	1	0	1	1	605.973	1815.91	1815.91	-1.55	-0.00094	HCD (High Energy Collision Dissociation)	MS2	55.7378	11.593	19.823	9205	MS201900090_4_PKA.raw	F4		35	48	41	0.207404	0	3.004e-07	3.36774e+06	19.83
		FALSE	High	Mascot (A5)	Unambiguous	[K].IAQLEEQLDNETKER.[Q]		1	1	P35579	P35579	1	2	0.6667	0	1	1	908.467	1815.93	1815.91	10.58	0.0096	HCD (High Energy Collision Dissociation)	MS2	40.0071	25	27.3653	17151	MS201900090_4_PKA.raw	F4		27	47	40	1.40514	0.001486	0.03452
	FALSE	High	[K].IAQLEEQLDNETK.[E]			1.43118e-06	0	1	1	11	P35579	P35579 [1816-1828]	0	1530.76	0	100		High	High	0	4.62e-07	76	26.42	K.IAQLEEQLDNETK.E	[1816-1828]		Used
		Checked	Confidence	Identifying Node	PSM Ambiguity	Annotated Sequence	Modifications	# Protein Groups	# Proteins	Master Protein Accessions	Protein Accessions	# Missed Cleavages	Charge	DeltaScore	DeltaCn	Rank	Search Engine Rank	m/z [Da]	MH+ [Da]	Theo. MH+ [Da]	DeltaM [ppm]	Deltam/z [Da]	Activation Type	MS Order	Isolation Interference [%]	Ion Inject Time [ms]	RT [min]	First Scan	Spectrum File	File ID	Quan Info	Ions Score	Identity Strict	Identity Relaxed	Expectation Value	Percolator q-Value	Percolator PEP	Precursor Abundance	Apex RT [min]
		FALSE	High	Mascot (A5)	Unambiguous	[K].IAQLEEQLDNETK.[E]		1	1	P35579	P35579	0	2	0.9155	0	1	1	765.886	1530.77	1530.76	0.74	0.00056	HCD (High Energy Collision Dissociation)	MS2	0	25	23.7287	13526	MS201900090_4_PKA.raw	F4		71	47	40	4.51087e-05	0	1.846e-06	7.2352e+06	23.79
		FALSE	High	Mascot (A5)	Unambiguous	[K].IAQLEEQLDNETK.[E]		1	1	P35579	P35579	0	2	0.8298	0	1	1	765.886	1530.77	1530.76	0.43	0.00033	HCD (High Energy Collision Dissociation)	MS2	0	25	30.4053	20541	MS201900090_4_PKA.raw	F4		47	47	40	0.0112315	0	6.816e-06
		FALSE	High	Mascot (A5)	Unambiguous	[K].IAQLEEQLDNETK.[E]		1	1	P35579	P35579	0	2	0.8571	0	1	1	765.886	1530.77	1530.76	0.38	0.00029	HCD (High Energy Collision Dissociation)	MS2	6.79041	25	26.225	15886	MS201900090_4_PKA.raw	F4		56	47	40	0.00166427	0	3.446e-06	943381952	26.42
		FALSE	High	Mascot (A5)	Unambiguous	[K].IAQLEEQLDNETK.[E]		1	1	P35579	P35579	0	2	0.9	0	1	1	765.886	1530.76	1530.76	0.11	8e-05	HCD (High Energy Collision Dissociation)	MS2	22.1201	25	27.6469	17482	MS201900090_4_PKA.raw	F4		50	47	40	0.00582404	0	6.383e-06	943381952	26.42
		FALSE	High	Mascot (A5)	Unambiguous	[K].IAQLEEQLDNETK.[E]		1	1	P35579	P35579	0	2	0.8421	0	1	1	765.886	1530.76	1530.76	0.07	6e-05	HCD (High Energy Collision Dissociation)	MS2	0	3.841	26.6859	16392	MS201900090_4_PKA.raw	F4		57	47	40	0.00115757	0	7.175e-06	943381952	26.42
		FALSE	High	Mascot (A5)	Unambiguous	[K].IAQLEEQLDNETK.[E]		1	1	P35579	P35579	0	2	0.8919	0	1	1	765.885	1530.76	1530.76	-1.53	-0.00117	HCD (High Energy Collision Dissociation)	MS2	33.1943	25	29.8549	19920	MS201900090_4_PKA.raw	F4		37	47	40	0.133266	0	1.507e-05
		FALSE	High	Mascot (A5)	Unambiguous	[K].IAQLEEQLDNETK.[E]		1	1	P35579	P35579	0	2	0.6324	0	1	1	765.884	1530.76	1530.76	-2.6	-0.00199	HCD (High Energy Collision Dissociation)	MS2	0	25	29.2967	19316	MS201900090_4_PKA.raw	F4		68	47	40	0.000103219	0	2.204e-05	3.27985e+06	28.84
		FALSE	High	Mascot (A5)	Unambiguous	[K].IAQLEEQLDNETK.[E]		1	1	P35579	P35579	0	2	0.7742	0	1	1	765.884	1530.76	1530.76	-2.71	-0.00208	HCD (High Energy Collision Dissociation)	MS2	56.2473	25	28.7331	18674	MS201900090_4_PKA.raw	F4		31	47	40	0.490154	0	1.901e-05	3.27985e+06	28.84
		FALSE	High	Mascot (A5)	Unambiguous	[K].IAQLEEQLDNETK.[E]		1	1	P35579	P35579	0	2	0.8947	0	1	1	765.883	1530.76	1530.76	-3.22	-0.00247	HCD (High Energy Collision Dissociation)	MS2	7.47364	25	28.1339	18020	MS201900090_4_PKA.raw	F4		76	47	40	1.34527e-05	0	4.62e-07
		FALSE	High	Mascot (A5)	Unambiguous	[K].IAQLEEQLDNETK.[E]		1	1	P35579	P35579	0	2	1	0	1	1	765.883	1530.76	1530.76	-4.16	-0.00319	HCD (High Energy Collision Dissociation)	MS2	36.6964	25	25.1244	14846	MS201900090_4_PKA.raw	F4		20	47	40	5.8591	0	1.116e-05	1.30121e+06	25.03
		FALSE	High	Mascot (A5)	Unambiguous	[K].IAQLEEQLDNETK.[E]		1	1	P35579	P35579	0	2	0.9149	0	1	1	765.885	1530.76	1530.76	-1.43	-0.00109	HCD (High Energy Collision Dissociation)	MS2	28.0004	17.163	27.1479	16918	MS201900090_4_PKA.raw	F4		47	47	40	0.0113428	0	4.586e-06	943381952	26.42
	FALSE	High	[R].IAQLEEELEEEQGNTELINDR.[L]	1xAcetyl [N-Term]	P35579 1xAcetyl [N-Term]	2.36743e-11	0	1	1	6	P35579	P35579 [1731-1751]	0	2514.18	0	100		High	High	0	3.114e-12	109	67.22	R.IAQLEEELEEEQGNTELINDR.L	[1731-1751]	1xAcetyl [N-Term]	Used
		Checked	Confidence	Identifying Node	PSM Ambiguity	Annotated Sequence	Modifications	# Protein Groups	# Proteins	Master Protein Accessions	Protein Accessions	# Missed Cleavages	Charge	DeltaScore	DeltaCn	Rank	Search Engine Rank	m/z [Da]	MH+ [Da]	Theo. MH+ [Da]	DeltaM [ppm]	Deltam/z [Da]	Activation Type	MS Order	Isolation Interference [%]	Ion Inject Time [ms]	RT [min]	First Scan	Spectrum File	File ID	Quan Info	Ions Score	Identity Strict	Identity Relaxed	Expectation Value	Percolator q-Value	Percolator PEP	Precursor Abundance	Apex RT [min]
		FALSE	High	Mascot (A5)	Unambiguous	[R].iAQLEEELEEEQGNTELINDR.[L]	N-Term(Acetyl)	1	1	P35579	P35579	0	2	0.9848	0	1	1	1257.61	2514.21	2514.18	8.84	0.01111	HCD (High Energy Collision Dissociation)	MS2	0	25	53.4463	45583	MS201900090_4_PKA.raw	F4		66	51	44	0.000323655	0	2.503e-05	565876	53.34
		FALSE	High	Mascot (A5)	Unambiguous	[R].iAQLEEELEEEQGNTELINDR.[L]	N-Term(Acetyl)	1	1	P35579	P35579	0	2	0.9908	0	1	1	1257.6	2514.19	2514.18	1.97	0.00248	HCD (High Energy Collision Dissociation)	MS2	15.5125	25	64.8848	58284	MS201900090_4_PKA.raw	F4		109	51	44	1.651e-08	0	3.114e-12
		FALSE	High	Mascot (A5)	Unambiguous	[R].iAQLEEELEEEQGNTELINDR.[L]	N-Term(Acetyl)	1	1	P35579	P35579	0	3	0.9697	0	1	1	838.733	2514.18	2514.18	0.28	0.00024	HCD (High Energy Collision Dissociation)	MS2	26.5196	25	67.3965	61219	MS201900090_4_PKA.raw	F4		66	51	44	0.00033575	0	1.031e-05	1.88738e+06	67.22
		FALSE	High	Mascot (A5)	Unambiguous	[R].iAQLEEELEEEQGNTELINDR.[L]	N-Term(Acetyl)	1	1	P35579	P35579	0	3	0.9659	0	1	1	838.728	2514.17	2514.18	-6.19	-0.00519	HCD (High Energy Collision Dissociation)	MS2	0	25	67.1016	60880	MS201900090_4_PKA.raw	F4		88	51	44	2.43196e-06	0	1.243e-09	1.88738e+06	67.22
		FALSE	High	Mascot (A5)	Unambiguous	[R].iAQLEEELEEEQGNTELINDR.[L]	N-Term(Acetyl)	1	1	P35579	P35579	0	2	0.9655	0	1	1	1257.58	2514.16	2514.18	-10.3	-0.01295	HCD (High Energy Collision Dissociation)	MS2	0	25	53.3115	45433	MS201900090_4_PKA.raw	F4		58	51	44	0.00224048	8.015e-05	4.034e-05
		FALSE	High	Mascot (A5)	Unambiguous	[R].iAQLEEELEEEQGNTELINDR.[L]	N-Term(Acetyl)	1	1	P35579	P35579	0	3	0.9	0	1	1	838.732	2514.18	2514.18	-1.1	-0.00092	HCD (High Energy Collision Dissociation)	MS2	79.9981	25	67.7845	61675	MS201900090_4_PKA.raw	F4		10	51	44	164.464	0.001195	0.02583	1.88738e+06	67.22
	FALSE	High	[R].IAQLEEELEEEQGNTELINDR.[L]			1.3482e-11	0	1	1	39	P35579	P35579 [1731-1751]	0	2472.17	0	100		High	High	0	2.404e-09	136	46.54	R.IAQLEEELEEEQGNTELINDR.L	[1731-1751]		Used
		Checked	Confidence	Identifying Node	PSM Ambiguity	Annotated Sequence	Modifications	# Protein Groups	# Proteins	Master Protein Accessions	Protein Accessions	# Missed Cleavages	Charge	DeltaScore	DeltaCn	Rank	Search Engine Rank	m/z [Da]	MH+ [Da]	Theo. MH+ [Da]	DeltaM [ppm]	Deltam/z [Da]	Activation Type	MS Order	Isolation Interference [%]	Ion Inject Time [ms]	RT [min]	First Scan	Spectrum File	File ID	Quan Info	Ions Score	Identity Strict	Identity Relaxed	Expectation Value	Percolator q-Value	Percolator PEP	Precursor Abundance	Apex RT [min]
		FALSE	High	Mascot (A5)	Unambiguous	[R].IAQLEEELEEEQGNTELINDR.[L]		1	1	P35579	P35579	0	2	0.9829	0	1	1	1236.59	2472.16	2472.17	-3.5	-0.00432	HCD (High Energy Collision Dissociation)	MS2	0	25	50.0142	41794	MS201900090_4_PKA.raw	F4		117	51	44	3.20495e-09	0	1.363e-10
		FALSE	High	Mascot (A5)	Unambiguous	[R].IAQLEEELEEEQGNTELINDR.[L]		1	1	P35579	P35579	0	2	0.9904	0	1	1	1236.59	2472.17	2472.17	-3.42	-0.00422	HCD (High Energy Collision Dissociation)	MS2	55.3106	25	51.4896	43440	MS201900090_4_PKA.raw	F4		104	51	44	6.21674e-08	0	1.674e-10
		FALSE	High	Mascot (A5)	Unambiguous	[R].IAQLEEELEEEQGNTELINDR.[L]		1	1	P35579	P35579	0	2	0.9852	0	1	1	1236.59	2472.17	2472.17	-3.15	-0.0039	HCD (High Energy Collision Dissociation)	MS2	0	25	47.5119	39033	MS201900090_4_PKA.raw	F4		135	51	44	4.07993e-11	0	1.69e-12	458065888	46.54
		FALSE	High	Mascot (A5)	Unambiguous	[R].IAQLEEELEEEQGNTELINDR.[L]		1	1	P35579	P35579	0	2	0.9877	0	1	1	1236.59	2472.17	2472.17	-2.41	-0.00298	HCD (High Energy Collision Dissociation)	MS2	0	25	55.4474	47781	MS201900090_4_PKA.raw	F4		81	51	44	1.06447e-05	0	9.358e-10	665525	55.33
		FALSE	High	Mascot (A5)	Unambiguous	[R].IAQLEEELEEEQGNTELINDR.[L]		1	1	P35579	P35579	0	2	0.9744	0	1	1	1236.59	2472.17	2472.17	-1.87	-0.00231	HCD (High Energy Collision Dissociation)	MS2	0	25	62.1588	55117	MS201900090_4_PKA.raw	F4		78	51	44	2.29861e-05	0	3.241e-06	319548	62.15
		FALSE	High	Mascot (A5)	Unambiguous	[R].IAQLEEELEEEQGNTELINDR.[L]		1	1	P35579	P35579	0	2	0.7846	0	1	1	1236.59	2472.17	2472.17	-1.65	-0.00204	HCD (High Energy Collision Dissociation)	MS2	3.84139	25	49.5162	41260	MS201900090_4_PKA.raw	F4		65	51	44	0.000495243	0	8.629e-08	1.84882e+06	49.04
		FALSE	High	Mascot (A5)	Unambiguous	[R].IAQLEEELEEEQGNTELINDR.[L]		1	1	P35579	P35579	0	2	0.9872	0	1	1	1236.59	2472.17	2472.17	-0.76	-0.00094	HCD (High Energy Collision Dissociation)	MS2	0	25	53.9274	46124	MS201900090_4_PKA.raw	F4		78	51	44	2.24038e-05	0	4.675e-08
		FALSE	High	Mascot (A5)	Unambiguous	[R].IAQLEEELEEEQGNTELINDR.[L]		1	1	P35579	P35579	0	2	0.9658	0	1	1	1236.59	2472.17	2472.17	-0.59	-0.00072	HCD (High Energy Collision Dissociation)	MS2	0	25	47.5331	39056	MS201900090_4_PKA.raw	F4		117	51	44	2.53904e-09	0	4.865e-12	458065888	46.54
		FALSE	High	Mascot (A5)	Unambiguous	[R].IAQLEEELEEEQGNTELINDR.[L]		1	1	P35579	P35579	0	2	0.9661	0	1	1	1236.59	2472.18	2472.17	3.18	0.00393	HCD (High Energy Collision Dissociation)	MS2	0	25	74.6518	69545	MS201900090_4_PKA.raw	F4		59	51	44	0.00173368	0	2.544e-05
		FALSE	High	Mascot (A5)	Unambiguous	[R].IAQLEEELEEEQGNTELINDR.[L]		1	1	P35579	P35579	0	2	1	0	1	1	1236.59	2472.18	2472.17	3.2	0.00396	HCD (High Energy Collision Dissociation)	MS2		25	57.1174	49438	MS201900090_4_PKA.raw	F4		29	51	44	1.69761	0	2.968e-05
		FALSE	High	Mascot (A5)	Unambiguous	[R].IAQLEEELEEEQGNTELINDR.[L]		1	1	P35579	P35579	0	2	0.974	0	1	1	1236.6	2472.19	2472.17	5.66	0.00699	HCD (High Energy Collision Dissociation)	MS2	75.1573	25	57.6435	50006	MS201900090_4_PKA.raw	F4		77	51	44	2.492e-05	0	2.109e-08
		FALSE	High	Mascot (A5)	Unambiguous	[R].IAQLEEELEEEQGNTELINDR.[L]		1	1	P35579	P35579	0	2	0.9901	0	1	1	1236.6	2472.2	2472.17	11.57	0.0143	HCD (High Energy Collision Dissociation)	MS2	58.773	25	53.2686	45381	MS201900090_4_PKA.raw	F4		101	50	43	1.02158e-07	0	3.708e-08
		FALSE	High	Mascot (A5)	Unambiguous	[R].IAQLEEELEEEQGNTELINDR.[L]		1	1	P35579	P35579	0	2	0.9632	0	1	1	1236.59	2472.18	2472.17	2.92	0.00361	HCD (High Energy Collision Dissociation)	MS2	5.27137	0.585	46.6237	38027	MS201900090_4_PKA.raw	F4		136	51	44	3.64102e-11	0	2.404e-09	458065888	46.54
		FALSE	High	Mascot (A5)	Unambiguous	[R].IAQLEEELEEEQGNTELINDR.[L]		1	1	P35579	P35579	0	2	0.9623	0	1	1	1236.59	2472.18	2472.17	2.3	0.00285	HCD (High Energy Collision Dissociation)	MS2	55.6518	25	59.2571	51772	MS201900090_4_PKA.raw	F4		106	51	44	3.50098e-08	0	7.284e-08
		FALSE	High	Mascot (A5)	Unambiguous	[R].IAQLEEELEEEQGNTELINDR.[L]		1	1	P35579	P35579	0	3	0.9615	0	1	1	824.729	2472.17	2472.17	-0.26	-0.00021	HCD (High Energy Collision Dissociation)	MS2	27.5793	25	49.01	40679	MS201900090_4_PKA.raw	F4		52	51	44	0.00886101	0	1.397e-06
		FALSE	High	Mascot (A5)	Unambiguous	[R].IAQLEEELEEEQGNTELINDR.[L]		1	1	P35579	P35579	0	2	0.942	0	1	1	1236.59	2472.17	2472.17	-0.05	-6e-05	HCD (High Energy Collision Dissociation)	MS2	0	25	61.0527	53854	MS201900090_4_PKA.raw	F4		69	51	44	0.000171852	0	5.468e-06	299043	61
		FALSE	High	Mascot (A5)	Unambiguous	[R].IAQLEEELEEEQGNTELINDR.[L]		1	1	P35579	P35579	0	2	0.9011	0	1	1	1236.59	2472.18	2472.17	0.63	0.00078	HCD (High Energy Collision Dissociation)	MS2	7.13316	25	46.1717	37506	MS201900090_4_PKA.raw	F4		91	51	44	9.86148e-07	0	2.539e-09	458065888	46.54
		FALSE	High	Mascot (A5)	Unambiguous	[R].IAQLEEELEEEQGNTELINDR.[L]		1	1	P35579	P35579	0	2	0.9655	0	1	1	1236.59	2472.18	2472.17	0.72	0.00089	HCD (High Energy Collision Dissociation)	MS2	0	25	51.296	43237	MS201900090_4_PKA.raw	F4		116	51	44	3.09335e-09	0	4.298e-10
		FALSE	High	Mascot (A5)	Unambiguous	[R].IAQLEEELEEEQGNTELINDR.[L]		1	1	P35579	P35579	0	2	0.949	0	1	1	1236.59	2472.18	2472.17	0.77	0.00095	HCD (High Energy Collision Dissociation)	MS2	0	12.269	47.1059	38573	MS201900090_4_PKA.raw	F4		98	51	44	2.02266e-07	0	6.68e-10	458065888	46.54
		FALSE	High	Mascot (A5)	Unambiguous	[R].IAQLEEELEEEQGNTELINDR.[L]		1	1	P35579	P35579	0	2	0.9524	0	1	1	1236.59	2472.18	2472.17	0.89	0.0011	HCD (High Energy Collision Dissociation)	MS2	0	25	52.9648	45048	MS201900090_4_PKA.raw	F4		105	51	44	4.03115e-08	0	6.023e-10
		FALSE	High	Mascot (A5)	Unambiguous	[R].IAQLEEELEEEQGNTELINDR.[L]		1	1	P35579	P35579	0	2	0.9365	0	1	1	1236.59	2472.18	2472.17	0.99	0.00122	HCD (High Energy Collision Dissociation)	MS2	0	25	64.5874	57962	MS201900090_4_PKA.raw	F4		63	51	44	0.000719985	0	1.961e-05	375930	64.34
		FALSE	High	Mascot (A5)	Unambiguous	[R].IAQLEEELEEEQGNTELINDR.[L]		1	1	P35579	P35579	0	2	0.9432	0	1	1	1236.59	2472.18	2472.17	1.08	0.00133	HCD (High Energy Collision Dissociation)	MS2	0	25	50.5233	42377	MS201900090_4_PKA.raw	F4		88	51	44	2.317e-06	0	2.532e-10
		FALSE	High	Mascot (A5)	Unambiguous	[R].IAQLEEELEEEQGNTELINDR.[L]		1	1	P35579	P35579	0	2	0.9302	0	1	1	1236.59	2472.18	2472.17	1.39	0.00171	HCD (High Energy Collision Dissociation)	MS2	23.9161	25	72.1164	66631	MS201900090_4_PKA.raw	F4		86	51	44	3.52273e-06	0	7.021e-06	435945	72.08
		FALSE	High	Mascot (A5)	Unambiguous	[R].IAQLEEELEEEQGNTELINDR.[L]		1	1	P35579	P35579	0	3	1	0	1	1	824.731	2472.18	2472.17	1.64	0.00135	HCD (High Energy Collision Dissociation)	MS2	19.6688	13.416	47.2873	38776	MS201900090_4_PKA.raw	F4		46	51	44	0.0345253	0	3.422e-06	288064576	46.55
		FALSE	High	Mascot (A5)	Unambiguous	[R].IAQLEEELEEEQGNTELINDR.[L]		1	1	P35579	P35579	0	2	0.9802	0	1	1	1236.59	2472.18	2472.17	2.26	0.00279	HCD (High Energy Collision Dissociation)	MS2	0	25	52.4885	44507	MS201900090_4_PKA.raw	F4		101	51	44	9.98849e-08	0	1.091e-09
		FALSE	High	Mascot (A5)	Unambiguous	[R].IAQLEEELEEEQGNTELINDR.[L]		1	1	P35579	P35579	0	2	0.8	0	1	1	1236.58	2472.16	2472.17	-6.3	-0.00779	HCD (High Energy Collision Dissociation)	MS2	0	25	60.5037	53244	MS201900090_4_PKA.raw	F4		65	51	44	0.000457877	8.015e-05	0.00016
		FALSE	High	Mascot (A5)	Unambiguous	[R].IAQLEEELEEEQGNTELINDR.[L]		1	1	P35579	P35579	0	2	0.9231	0	1	1	1236.58	2472.16	2472.17	-5.15	-0.00636	HCD (High Energy Collision Dissociation)	MS2	0	25	69.242	63360	MS201900090_4_PKA.raw	F4		78	51	44	2.31555e-05	8.015e-05	6.553e-05
		FALSE	High	Mascot (A5)	Unambiguous	[R].IAQLEEELEEEQGNTELINDR.[L]		1	1	P35579	P35579	0	3	1	0	1	1	824.728	2472.17	2472.17	-1.5	-0.00124	HCD (High Energy Collision Dissociation)	MS2	45.6023	25	62.371	55357	MS201900090_4_PKA.raw	F4		17	51	44	28.3136	8.015e-05	0.000409	283515	62.1
		FALSE	High	Mascot (A5)	Unambiguous	[R].IAQLEEELEEEQGNTELINDR.[L]		1	1	P35579	P35579	0	2	0.9211	0	1	1	1236.59	2472.18	2472.17	3.07	0.00379	HCD (High Energy Collision Dissociation)	MS2	0	25	74.1934	69022	MS201900090_4_PKA.raw	F4		76	51	44	3.41615e-05	8.015e-05	4.21e-05
		FALSE	High	Mascot (A5)	Unambiguous	[R].IAQLEEELEEEQGNTELINDR.[L]		1	1	P35579	P35579	0	2	0.9565	0	1	1	1236.59	2472.17	2472.17	-0.51	-0.00063	HCD (High Energy Collision Dissociation)	MS2	43.9913	25	63.9009	57151	MS201900090_4_PKA.raw	F4		23	51	44	7.73374	8.015e-05	0.0004894	375930	64.34
		FALSE	High	Mascot (A5)	Unambiguous	[R].IAQLEEELEEEQGNTELINDR.[L]		1	1	P35579	P35579	0	2	0.9455	0	1	1	1236.59	2472.17	2472.17	-0.42	-0.00052	HCD (High Energy Collision Dissociation)	MS2	67.845	25	69.092	63186	MS201900090_4_PKA.raw	F4		55	51	44	0.00420605	8.015e-05	5.493e-05
		FALSE	High	Mascot (A5)	Unambiguous	[R].IAQLEEELEEEQGNTELINDR.[L]		1	1	P35579	P35579	0	2	0.7966	0	1	1	1236.59	2472.17	2472.17	-0.16	-0.0002	HCD (High Energy Collision Dissociation)	MS2	21.3174	25	66.9891	60749	MS201900090_4_PKA.raw	F4		59	51	44	0.0019069	8.015e-05	8.027e-05
		FALSE	High	Mascot (A5)	Unambiguous	[R].IAQLEEELEEEQGNTELINDR.[L]		1	1	P35579	P35579	0	2	0.8261	0	1	1	1236.59	2472.18	2472.17	2.07	0.00256	HCD (High Energy Collision Dissociation)	MS2		25	58.3822	50833	MS201900090_4_PKA.raw	F4		23	51	44	7.28933	0.0001341	0.00111
		FALSE	High	Mascot (A5)	Unambiguous	[R].IAQLEEELEEEQGNTELINDR.[L]		1	1	P35579	P35579	0	2	0.7391	0	1	1	1236.59	2472.18	2472.17	0.96	0.00119	HCD (High Energy Collision Dissociation)	MS2	56.6261	25	66.0491	59641	MS201900090_4_PKA.raw	F4		23	51	44	7.33693	0.0001341	0.002411
		FALSE	High	Mascot (A5)	Unambiguous	[R].IAQLEEELEEEQGNTELINDR.[L]		1	1	P35579	P35579	0	3	0.8438	0	1	1	824.73	2472.17	2472.17	0.21	0.00017	HCD (High Energy Collision Dissociation)	MS2		25	65.4752	58974	MS201900090_4_PKA.raw	F4		32	51	44	0.80502	0.0001341	0.0014	225120	65.64
		FALSE	High	Mascot (A5)	Unambiguous	[R].IAQLEEELEEEQGNTELINDR.[L]		1	1	P35579	P35579	0	3	0.7778	0	1	1	824.723	2472.15	2472.17	-7.73	-0.00637	HCD (High Energy Collision Dissociation)	MS2	60.9012	25	65.6258	59150	MS201900090_4_PKA.raw	F4		9	51	44	201.623	0.0001341	0.001336	225120	65.64
		FALSE	High	Mascot (A5)	Unambiguous	[R].IAQLEEELEEEQGNTELINDR.[L]		1	1	P35579	P35579	0	2	0.9091	0	1	1	1236.59	2472.17	2472.17	-2.83	-0.0035	HCD (High Energy Collision Dissociation)	MS2	0	25	67.0408	60805	MS201900090_4_PKA.raw	F4		33	51	44	0.637521	0.0002495	0.003333
		FALSE	High	Mascot (A5)	Unambiguous	[R].IAQLEEELEEEQGNTELINDR.[L]		1	1	P35579	P35579	0	3		0	1	1	824.727	2472.17	2472.17	-2.5	-0.00206	HCD (High Energy Collision Dissociation)	MS2	87.3611	25	62.6635	55699	MS201900090_4_PKA.raw	F4		0	51	44	1361.7	0.0007363	0.01415	283515	62.1
		FALSE	High	Mascot (A5)	Unambiguous	[R].IAQLEEELEEEQGNTELINDR.[L]		1	1	P35579	P35579	0	2	0.8667	0	1	1	1236.61	2472.21	2472.17	13.36	0.01652	HCD (High Energy Collision Dissociation)	MS2	17.8811	25	71.2453	65668	MS201900090_4_PKA.raw	F4		15	50	43	38.0435	0.001153	0.02183
	FALSE	High	[K].LEGDSTDLSDQIAELQAQIAELK.[M]			1.14362e-10	0	1	1	1	P35579	P35579 [1053-1075]	0	2487.25	0	100		High	High	0	1.704e-11	128	72.58	K.LEGDSTDLSDQIAELQAQIAELK.M	[1053-1075]		Used
		Checked	Confidence	Identifying Node	PSM Ambiguity	Annotated Sequence	Modifications	# Protein Groups	# Proteins	Master Protein Accessions	Protein Accessions	# Missed Cleavages	Charge	DeltaScore	DeltaCn	Rank	Search Engine Rank	m/z [Da]	MH+ [Da]	Theo. MH+ [Da]	DeltaM [ppm]	Deltam/z [Da]	Activation Type	MS Order	Isolation Interference [%]	Ion Inject Time [ms]	RT [min]	First Scan	Spectrum File	File ID	Quan Info	Ions Score	Identity Strict	Identity Relaxed	Expectation Value	Percolator q-Value	Percolator PEP	Precursor Abundance	Apex RT [min]
		FALSE	High	Mascot (A5)	Unambiguous	[K].LEGDSTDLSDQIAELQAQIAELK.[M]		1	1	P35579	P35579	0	2	1	0	1	1	1244.13	2487.25	2487.25	1.14	0.00142	HCD (High Energy Collision Dissociation)	MS2	2.11489	10.184	72.5843	67165	MS201900090_4_PKA.raw	F4		128	49	42	1.57591e-10	0	1.704e-11	26543548	72.58
	FALSE	High	[K].LEEEQIILEDQNCK.[L]	1xPropionamide [C13]		3.1248e-07	0	1	1	1	P35579	P35579 [976-989]	0	1774.85	0	100		High	High	0	8.924e-08	88	31.56	K.LEEEQIILEDQNCK.L	[976-989]		Used
		Checked	Confidence	Identifying Node	PSM Ambiguity	Annotated Sequence	Modifications	# Protein Groups	# Proteins	Master Protein Accessions	Protein Accessions	# Missed Cleavages	Charge	DeltaScore	DeltaCn	Rank	Search Engine Rank	m/z [Da]	MH+ [Da]	Theo. MH+ [Da]	DeltaM [ppm]	Deltam/z [Da]	Activation Type	MS Order	Isolation Interference [%]	Ion Inject Time [ms]	RT [min]	First Scan	Spectrum File	File ID	Quan Info	Ions Score	Identity Strict	Identity Relaxed	Expectation Value	Percolator q-Value	Percolator PEP	Precursor Abundance	Apex RT [min]
		FALSE	High	Mascot (A5)	Unambiguous	[K].LEEEQIILEDQNcK.[L]	C13(Propionamide)	1	1	P35579	P35579	0	2	0.9545	0	1	1	887.93	1774.85	1774.85	-0.37	-0.00033	HCD (High Energy Collision Dissociation)	MS2	0	25	31.4852	21688	MS201900090_4_PKA.raw	F4		88	49	42	1.36097e-06	0	8.924e-08	1.41328e+06	31.56
	FALSE	High	[K].LEMDLKDLEAHIDSANK.[N]	1xOxidation [M3]		6.34056e-07	0	1	1	1	P35579	P35579 [1615-1631]	1	1957.95	0	100		High	High	0	1.909e-07	52	31.69	K.LEMDLKDLEAHIDSANK.N	[1615-1631]		Used
		Checked	Confidence	Identifying Node	PSM Ambiguity	Annotated Sequence	Modifications	# Protein Groups	# Proteins	Master Protein Accessions	Protein Accessions	# Missed Cleavages	Charge	DeltaScore	DeltaCn	Rank	Search Engine Rank	m/z [Da]	MH+ [Da]	Theo. MH+ [Da]	DeltaM [ppm]	Deltam/z [Da]	Activation Type	MS Order	Isolation Interference [%]	Ion Inject Time [ms]	RT [min]	First Scan	Spectrum File	File ID	Quan Info	Ions Score	Identity Strict	Identity Relaxed	Expectation Value	Percolator q-Value	Percolator PEP	Precursor Abundance	Apex RT [min]
		FALSE	High	Mascot (A5)	Unambiguous	[K].LEmDLKDLEAHIDSANK.[N]	M3(Oxidation)	1	1	P35579	P35579	1	3	1	0	1	1	653.323	1957.95	1957.95	-0.11	-7e-05	HCD (High Energy Collision Dissociation)	MS2	13.5134	20.621	31.4822	21684	MS201900090_4_PKA.raw	F4		52	49	42	0.00581318	0	1.909e-07	5605064	31.69
	FALSE	High	[K].LEMDLKDLEAHIDSANK.[N]			1.27323e-07	0	1	1	1	P35579	P35579 [1615-1631]	1	1941.96	0	100		High	High	0	3.371e-08	44	40.93	K.LEMDLKDLEAHIDSANK.N	[1615-1631]		Used
		Checked	Confidence	Identifying Node	PSM Ambiguity	Annotated Sequence	Modifications	# Protein Groups	# Proteins	Master Protein Accessions	Protein Accessions	# Missed Cleavages	Charge	DeltaScore	DeltaCn	Rank	Search Engine Rank	m/z [Da]	MH+ [Da]	Theo. MH+ [Da]	DeltaM [ppm]	Deltam/z [Da]	Activation Type	MS Order	Isolation Interference [%]	Ion Inject Time [ms]	RT [min]	First Scan	Spectrum File	File ID	Quan Info	Ions Score	Identity Strict	Identity Relaxed	Expectation Value	Percolator q-Value	Percolator PEP	Precursor Abundance	Apex RT [min]
		FALSE	High	Mascot (A5)	Unambiguous	[K].LEMDLKDLEAHIDSANK.[N]		1	1	P35579	P35579	1	3	1	0	1	1	647.991	1941.96	1941.96	-0.43	-0.00028	HCD (High Energy Collision Dissociation)	MS2	24.3733	25	40.8477	31729	MS201900090_4_PKA.raw	F4		44	49	42	0.0319936	0	3.371e-08	4.94652e+06	40.93
	FALSE	High	[R].KGAGDGSDEEVDGKADGAEAKPAE.[-]	1xPhospho [S7]	P35579 1xPhospho [S1943]	3.54916e-05	0	1	1	1	P35579	P35579 [1937-1960]	2	2382.99	0	100		High	High	0	1.491e-05	59	15.12	R.KGAGDGSDEEVDGKADGAEAKPAE.-	[1937-1960]	1xPhospho [S1943]	Used
		Checked	Confidence	Identifying Node	PSM Ambiguity	Annotated Sequence	Modifications	# Protein Groups	# Proteins	Master Protein Accessions	Protein Accessions	# Missed Cleavages	Charge	DeltaScore	DeltaCn	Rank	Search Engine Rank	m/z [Da]	MH+ [Da]	Theo. MH+ [Da]	DeltaM [ppm]	Deltam/z [Da]	Activation Type	MS Order	Isolation Interference [%]	Ion Inject Time [ms]	RT [min]	First Scan	Spectrum File	File ID	Quan Info	Ions Score	Identity Strict	Identity Relaxed	Expectation Value	Percolator q-Value	Percolator PEP	Precursor Abundance	Apex RT [min]
		FALSE	High	Mascot (A5)	Unambiguous	[R].KGAGDGsDEEVDGKADGAEAKPAE.[-]	S7(Phospho)	1	1	P35579	P35579	2	3	1	0	1	1	795.003	2383	2382.99	0.77	0.00061	HCD (High Energy Collision Dissociation)	MS2	0	25	15.0877	4101	MS201900090_4_PKA.raw	F4		59	51	44	0.00185481	0	1.491e-05	5.21779e+06	15.12
	FALSE	High	[R].KLEGDSTDLSDQIAELQAQIAELK.[M]	1xAcetyl [N-Term]; 1xAcetyl [K1]	P35579 1xAcetyl [K1052]; 1xAcetyl [N-Term]	3.8007e-05	0	1	1	6	P35579	P35579 [1052-1075]	1	2657.35	0	100		High	High	0	1.606e-05	33	71.22	R.KLEGDSTDLSDQIAELQAQIAELK.M	[1052-1075]	1xAcetyl [K1052]; 1xAcetyl [N-Term]	Used
		Checked	Confidence	Identifying Node	PSM Ambiguity	Annotated Sequence	Modifications	# Protein Groups	# Proteins	Master Protein Accessions	Protein Accessions	# Missed Cleavages	Charge	DeltaScore	DeltaCn	Rank	Search Engine Rank	m/z [Da]	MH+ [Da]	Theo. MH+ [Da]	DeltaM [ppm]	Deltam/z [Da]	Activation Type	MS Order	Isolation Interference [%]	Ion Inject Time [ms]	RT [min]	First Scan	Spectrum File	File ID	Quan Info	Ions Score	Identity Strict	Identity Relaxed	Expectation Value	Percolator q-Value	Percolator PEP	Precursor Abundance	Apex RT [min]
		FALSE	High	Mascot (A5)	Unambiguous	[R].kLEGDSTDLSDQIAELQAQIAELK.[M]	K1(Acetyl)	1	1	P35579	P35579	1	3	1	0	1	1	886.462	2657.37	2657.35	7.53	0.00667	HCD (High Energy Collision Dissociation)	MS2		11.751	71.2163	65634	MS201900090_4_PKA.raw	F4		33	48	41	0.306152	0	1.606e-05	6088753	71.22
		FALSE	High	Mascot (A5)	Unambiguous	[R].kLEGDSTDLSDQIAELQAQIAELK.[M]	N-Term(Acetyl)	1	1	P35579	P35579	1	3	1	0	1	2	886.462	2657.37	2657.35	7.53	0.00667	HCD (High Energy Collision Dissociation)	MS2		11.751	71.2163	65634	MS201900090_4_PKA.raw	F4		33	48	41	0.306152	0	1.606e-05	6088753	71.22
		FALSE	High	Mascot (A5)	Unambiguous	[R].kLEGDSTDLSDQIAELQAQIAELK.[M]	K1(Acetyl)	1	1	P35579	P35579	1	3	1	0	1	1	886.443	2657.32	2657.35	-13.75	-0.01218	HCD (High Energy Collision Dissociation)	MS2	51.2428	25	69.1725	63283	MS201900090_4_PKA.raw	F4		23	50	43	6.13093	0.0004105	0.009745
		FALSE	High	Mascot (A5)	Unambiguous	[R].kLEGDSTDLSDQIAELQAQIAELK.[M]	N-Term(Acetyl)	1	1	P35579	P35579	1	3	1	0	1	2	886.443	2657.32	2657.35	-13.75	-0.01218	HCD (High Energy Collision Dissociation)	MS2	51.2428	25	69.1725	63283	MS201900090_4_PKA.raw	F4		23	50	43	6.13093	0.0004105	0.009745
		FALSE	High	Mascot (A5)	Unambiguous	[R].kLEGDSTDLSDQIAELQAQIAELK.[M]	N-Term(Acetyl)	1	1	P35579	P35579	1	3		0	1	2	886.455	2657.35	2657.35	-0.69	-0.00061	HCD (High Energy Collision Dissociation)	MS2	18.8967	25	72.5454	67115	MS201900090_4_PKA.raw	F4		0	49	42	734.77	0.009027	0.1953	719098	72.48
		FALSE	High	Mascot (A5)	Unambiguous	[R].kLEGDSTDLSDQIAELQAQIAELK.[M]	K1(Acetyl)	1	1	P35579	P35579	1	3		0	1	1	886.455	2657.35	2657.35	-0.69	-0.00061	HCD (High Energy Collision Dissociation)	MS2	18.8967	25	72.5454	67115	MS201900090_4_PKA.raw	F4		0	49	42	734.77	0.009027	0.1953	719098	72.48
	FALSE	High	[R].KLEGDSTDLSDQIAELQAQIAELK.[M]			1.12096e-09	0	1	1	7	P35579	P35579 [1052-1075]	1	2615.34	0	100		High	High	0	8.1e-09	110	68.05	R.KLEGDSTDLSDQIAELQAQIAELK.M	[1052-1075]		Used
		Checked	Confidence	Identifying Node	PSM Ambiguity	Annotated Sequence	Modifications	# Protein Groups	# Proteins	Master Protein Accessions	Protein Accessions	# Missed Cleavages	Charge	DeltaScore	DeltaCn	Rank	Search Engine Rank	m/z [Da]	MH+ [Da]	Theo. MH+ [Da]	DeltaM [ppm]	Deltam/z [Da]	Activation Type	MS Order	Isolation Interference [%]	Ion Inject Time [ms]	RT [min]	First Scan	Spectrum File	File ID	Quan Info	Ions Score	Identity Strict	Identity Relaxed	Expectation Value	Percolator q-Value	Percolator PEP	Precursor Abundance	Apex RT [min]
		FALSE	High	Mascot (A5)	Unambiguous	[R].KLEGDSTDLSDQIAELQAQIAELK.[M]		1	1	P35579	P35579	1	3	0.9892	0	1	1	872.451	2615.34	2615.34	-0.81	-0.00071	HCD (High Energy Collision Dissociation)	MS2	0	25	69.4006	63544	MS201900090_4_PKA.raw	F4		93	48	41	3.97835e-07	0	2.157e-08	7.78542e+06	69.48
		FALSE	High	Mascot (A5)	Unambiguous	[R].KLEGDSTDLSDQIAELQAQIAELK.[M]		1	1	P35579	P35579	1	3	0.9841	0	1	1	872.442	2615.31	2615.34	-10.77	-0.00939	HCD (High Energy Collision Dissociation)	MS2	17.601	25	57.5696	49913	MS201900090_4_PKA.raw	F4		63	49	42	0.000427649	0	8.604e-06
		FALSE	High	Mascot (A5)	Unambiguous	[R].KLEGDSTDLSDQIAELQAQIAELK.[M]		1	1	P35579	P35579	1	3	0.9909	0	1	1	872.451	2615.34	2615.34	-0.72	-0.00063	HCD (High Energy Collision Dissociation)	MS2	2.76637	22.969	68.3971	62377	MS201900090_4_PKA.raw	F4		110	48	41	8.21285e-09	0	2.017e-10	393827424	68.05
		FALSE	High	Mascot (A5)	Unambiguous	[R].KLEGDSTDLSDQIAELQAQIAELK.[M]		1	1	P35579	P35579	1	3	0.9909	0	1	1	872.453	2615.35	2615.34	1.72	0.0015	HCD (High Energy Collision Dissociation)	MS2	3.36399	10.218	67.9026	61807	MS201900090_4_PKA.raw	F4		110	48	41	7.54903e-09	0	8.1e-09	393827424	68.05
		FALSE	High	Mascot (A5)	Unambiguous	[R].KLEGDSTDLSDQIAELQAQIAELK.[M]		1	1	P35579	P35579	1	3	1	0	1	1	872.452	2615.34	2615.34	0.07	6e-05	HCD (High Energy Collision Dissociation)	MS2	14.6798	25	68.9178	62981	MS201900090_4_PKA.raw	F4		98	48	41	1.2605e-07	0	6.276e-08	393827424	68.05
		FALSE	High	Mascot (A5)	Unambiguous	[R].KLEGDSTDLSDQIAELQAQIAELK.[M]		1	1	P35579	P35579	1	3	1	0	1	1	872.452	2615.34	2615.34	-0.41	-0.00036	HCD (High Energy Collision Dissociation)	MS2	69.4231	25	70.1053	64348	MS201900090_4_PKA.raw	F4		19	48	41	8.5313	0.0002495	0.004989	400507	70.24
		FALSE	High	Mascot (A5)	Unambiguous	[R].KLEGDSTDLSDQIAELQAQIAELK.[M]		1	1	P35579	P35579	1	3	1	0	1	1	872.454	2615.35	2615.34	2.63	0.0023	HCD (High Energy Collision Dissociation)	MS2	10.7375	25	70.6209	64950	MS201900090_4_PKA.raw	F4		20	48	41	6.00924	0.001486	0.0327	400507	70.24
	FALSE	High	[K].HSQAVEELAEQLEQTKR.[V]	1xAcetyl [N-Term]	P35579 1xAcetyl [N-Term]	5.93938e-14	0	1	1	9	P35579	P35579 [1194-1210]	1	2038.02	0	100		High	High	0	4.799e-15	114	39.91	K.HSQAVEELAEQLEQTKR.V	[1194-1210]	1xAcetyl [N-Term]	Used
		Checked	Confidence	Identifying Node	PSM Ambiguity	Annotated Sequence	Modifications	# Protein Groups	# Proteins	Master Protein Accessions	Protein Accessions	# Missed Cleavages	Charge	DeltaScore	DeltaCn	Rank	Search Engine Rank	m/z [Da]	MH+ [Da]	Theo. MH+ [Da]	DeltaM [ppm]	Deltam/z [Da]	Activation Type	MS Order	Isolation Interference [%]	Ion Inject Time [ms]	RT [min]	First Scan	Spectrum File	File ID	Quan Info	Ions Score	Identity Strict	Identity Relaxed	Expectation Value	Percolator q-Value	Percolator PEP	Precursor Abundance	Apex RT [min]
		FALSE	High	Mascot (A5)	Unambiguous	[K].hSQAVEELAEQLEQTKR.[V]	N-Term(Acetyl)	1	1	P35579	P35579	1	3	1	0	1	1	680.01	2038.01	2038.02	-2.66	-0.00181	HCD (High Energy Collision Dissociation)	MS2	10.1978	25	40.2507	31061	MS201900090_4_PKA.raw	F4		43	49	42	0.0368296	0	5.388e-09	33108488	39.91
		FALSE	High	Mascot (A5)	Unambiguous	[K].hSQAVEELAEQLEQTKR.[V]	N-Term(Acetyl)	1	1	P35579	P35579	1	3	1	0	1	1	680.01	2038.02	2038.02	-1.77	-0.0012	HCD (High Energy Collision Dissociation)	MS2	48.7908	25	37.185	27528	MS201900090_4_PKA.raw	F4		39	49	42	0.109276	0	5.011e-06	2.13816e+06	36.85
		FALSE	High	Mascot (A5)	Unambiguous	[K].hSQAVEELAEQLEQTKR.[V]	N-Term(Acetyl)	1	1	P35579	P35579	1	3	1	0	1	1	680.011	2038.02	2038.02	-1.46	-0.00099	HCD (High Energy Collision Dissociation)	MS2	42.2626	25	36.7355	27044	MS201900090_4_PKA.raw	F4		56	49	42	0.00205646	0	1.076e-08	2.13816e+06	36.85
		FALSE	High	Mascot (A5)	Unambiguous	[K].hSQAVEELAEQLEQTKR.[V]	N-Term(Acetyl)	1	1	P35579	P35579	1	3	0.9901	0	1	1	680.012	2038.02	2038.02	0.27	0.00018	HCD (High Energy Collision Dissociation)	MS2	16.1672	25	39.7587	30491	MS201900090_4_PKA.raw	F4		101	48	41	6.78725e-08	0	1.791e-12	33108488	39.91
		FALSE	High	Mascot (A5)	Unambiguous	[K].hSQAVEELAEQLEQTKR.[V]	N-Term(Acetyl)	1	1	P35579	P35579	1	3	0.9825	0	1	1	680.012	2038.02	2038.02	0.27	0.00018	HCD (High Energy Collision Dissociation)	MS2	26.3029	25	39.7734	30510	MS201900090_4_PKA.raw	F4		114	48	41	3.03175e-09	0	4.799e-15	33108488	39.91
		FALSE	High	Mascot (A5)	Unambiguous	[K].hSQAVEELAEQLEQTKR.[V]	N-Term(Acetyl)	1	1	P35579	P35579	1	3	1	0	1	1	680.01	2038.01	2038.02	-2.8	-0.0019	HCD (High Energy Collision Dissociation)	MS2	24.6526	25	42.3509	33409	MS201900090_4_PKA.raw	F4		48	49	42	0.0123735	0	5.675e-07	703943	42.31
		FALSE	High	Mascot (A5)	Unambiguous	[K].hSQAVEELAEQLEQTKR.[V]	N-Term(Acetyl)	1	1	P35579	P35579	1	3	1	0	1	1	680.011	2038.02	2038.02	-0.57	-0.00039	HCD (High Energy Collision Dissociation)	MS2	19.47	25	40.8104	31683	MS201900090_4_PKA.raw	F4		23	48	41	3.87195	8.015e-05	0.0003771	4.13528e+06	40.52
		FALSE	High	Mascot (A5)	Unambiguous	[K].hSQAVEELAEQLEQTKR.[V]	N-Term(Acetyl)	1	1	P35579	P35579	1	3	0.8261	0	1	1	680.011	2038.02	2038.02	-0.74	-0.0005	HCD (High Energy Collision Dissociation)	MS2	61.0514	25	41.4527	32424	MS201900090_4_PKA.raw	F4		46	48	42	0.0205602	8.015e-05	0.0002802	1.22718e+06	41.36
		FALSE	High	Mascot (A5)	Unambiguous	[K].hSQAVEELAEQLEQTKR.[V]	N-Term(Acetyl)	1	1	P35579	P35579	1	3	1	0	1	1	680.014	2038.03	2038.02	3.19	0.00217	HCD (High Energy Collision Dissociation)	MS2	41.5431	25	40.8926	31776	MS201900090_4_PKA.raw	F4		18	48	41	13.0084	0.0002495	0.004917	4.13528e+06	40.52
	FALSE	High	[K].HSQAVEELAEQLEQTKR.[V]			2.22136e-12	0	1	1	8	P35579	P35579 [1194-1210]	1	1996.01	0	100		High	High	0	2.416e-13	116	30.53	K.HSQAVEELAEQLEQTKR.V	[1194-1210]		Used
		Checked	Confidence	Identifying Node	PSM Ambiguity	Annotated Sequence	Modifications	# Protein Groups	# Proteins	Master Protein Accessions	Protein Accessions	# Missed Cleavages	Charge	DeltaScore	DeltaCn	Rank	Search Engine Rank	m/z [Da]	MH+ [Da]	Theo. MH+ [Da]	DeltaM [ppm]	Deltam/z [Da]	Activation Type	MS Order	Isolation Interference [%]	Ion Inject Time [ms]	RT [min]	First Scan	Spectrum File	File ID	Quan Info	Ions Score	Identity Strict	Identity Relaxed	Expectation Value	Percolator q-Value	Percolator PEP	Precursor Abundance	Apex RT [min]
		FALSE	High	Mascot (A5)	Unambiguous	[K].HSQAVEELAEQLEQTKR.[V]		1	1	P35579	P35579	1	3	0.9219	0	1	1	666.005	1996	1996.01	-4.22	-0.00281	HCD (High Energy Collision Dissociation)	MS2	38.6029	25	32.9488	23063	MS201900090_4_PKA.raw	F4		64	48	41	0.000299701	0	1.04e-09
		FALSE	High	Mascot (A5)	Unambiguous	[K].HSQAVEELAEQLEQTKR.[V]		1	1	P35579	P35579	1	3	1	0	1	1	666.007	1996.01	1996.01	-0.89	-0.00059	HCD (High Energy Collision Dissociation)	MS2	58.2231	25	31.6323	21852	MS201900090_4_PKA.raw	F4		36	48	41	0.181806	0	6.957e-06	314929248	30.53
		FALSE	High	Mascot (A5)	Unambiguous	[K].HSQAVEELAEQLEQTKR.[V]		1	1	P35579	P35579	1	3	0.9293	0	1	1	666.008	1996.01	1996.01	-0.57	-0.00038	HCD (High Energy Collision Dissociation)	MS2	0	25	32.4584	22521	MS201900090_4_PKA.raw	F4		99	48	41	1.01722e-07	0	3.456e-09
		FALSE	High	Mascot (A5)	Unambiguous	[K].HSQAVEELAEQLEQTKR.[V]		1	1	P35579	P35579	1	3	0.9828	0	1	1	666.008	1996.01	1996.01	-0.16	-0.00011	HCD (High Energy Collision Dissociation)	MS2	0	25	30.2529	20372	MS201900090_4_PKA.raw	F4		116	48	41	1.71808e-09	0	2.416e-13	314929248	30.53
		FALSE	High	Mascot (A5)	Unambiguous	[K].HSQAVEELAEQLEQTKR.[V]		1	1	P35579	P35579	1	3	0.95	0	1	1	666.009	1996.01	1996.01	1.28	0.00085	HCD (High Energy Collision Dissociation)	MS2	16.7627	13.38	31.1458	21315	MS201900090_4_PKA.raw	F4		40	48	41	0.0738592	0	3.275e-08	314929248	30.53
		FALSE	High	Mascot (A5)	Unambiguous	[K].HSQAVEELAEQLEQTKR.[V]		1	1	P35579	P35579	1	3	0.93	0	1	1	666.008	1996.01	1996.01	-0.31	-0.00021	HCD (High Energy Collision Dissociation)	MS2	0.995766	1.38	30.6952	20833	MS201900090_4_PKA.raw	F4		100	48	41	6.47148e-08	0	4.204e-12	314929248	30.53
		FALSE	High	Mascot (A5)	Unambiguous	[K].HSQAVEELAEQLEQTKR.[V]		1	1	P35579	P35579	1	3	1	0	1	1	666.008	1996.01	1996.01	0.12	8e-05	HCD (High Energy Collision Dissociation)	MS2	64.5563	25	34.5277	24579	MS201900090_4_PKA.raw	F4		26	48	41	1.70009	8.015e-05	4.718e-05
		FALSE	High	Mascot (A5)	Unambiguous	[K].HSQAVEELAEQLEQTKR.[V]		1	1	P35579	P35579	1	3	1	0	1	1	666.007	1996.01	1996.01	-0.81	-0.00054	HCD (High Energy Collision Dissociation)	MS2	79.9839	25	33.6267	23585	MS201900090_4_PKA.raw	F4		5	48	41	226.214	0.0001341	0.002754	1.22674e+06	33.66
	FALSE	High	[K].HSQAVEELAEQLEQTK.[R]	1xAcetyl [N-Term]	P35579 1xAcetyl [N-Term]	3.58344e-07	0	1	1	4	P35579	P35579 [1194-1209]	0	1881.92	0	100		High	High	0	1.03e-07	58	47.88	K.HSQAVEELAEQLEQTK.R	[1194-1209]	1xAcetyl [N-Term]	Used
		Checked	Confidence	Identifying Node	PSM Ambiguity	Annotated Sequence	Modifications	# Protein Groups	# Proteins	Master Protein Accessions	Protein Accessions	# Missed Cleavages	Charge	DeltaScore	DeltaCn	Rank	Search Engine Rank	m/z [Da]	MH+ [Da]	Theo. MH+ [Da]	DeltaM [ppm]	Deltam/z [Da]	Activation Type	MS Order	Isolation Interference [%]	Ion Inject Time [ms]	RT [min]	First Scan	Spectrum File	File ID	Quan Info	Ions Score	Identity Strict	Identity Relaxed	Expectation Value	Percolator q-Value	Percolator PEP	Precursor Abundance	Apex RT [min]
		FALSE	High	Mascot (A5)	Unambiguous	[K].hSQAVEELAEQLEQTK.[R]	N-Term(Acetyl)	1	1	P35579	P35579	0	3	0.931	0	1	1	627.978	1881.92	1881.92	0.37	0.00023	HCD (High Energy Collision Dissociation)	MS2	55.1774	25	47.6804	39207	MS201900090_4_PKA.raw	F4		58	49	42	0.00129597	0	1.03e-07	4.26138e+06	47.89
		FALSE	High	Mascot (A5)	Unambiguous	[K].hSQAVEELAEQLEQTK.[R]	N-Term(Acetyl)	1	1	P35579	P35579	0	2	1	0	1	1	941.464	1881.92	1881.92	0.89	0.00084	HCD (High Energy Collision Dissociation)	MS2	27.3664	25	48.1379	39685	MS201900090_4_PKA.raw	F4		37	49	42	0.183203	8.015e-05	4.33e-05	4.53831e+06	47.88
		FALSE	High	Mascot (A5)	Unambiguous	[K].hSQAVEELAEQLEQTK.[R]	N-Term(Acetyl)	1	1	P35579	P35579	0	2	0.9375	0	1	1	941.457	1881.91	1881.92	-6.8	-0.0064	HCD (High Energy Collision Dissociation)	MS2	57.105	25	43.8402	35114	MS201900090_4_PKA.raw	F4		16	49	42	22.7193	0.0002495	0.004788
		FALSE	High	Mascot (A5)	Unambiguous	[K].hSQAVEELAEQLEQTK.[R]	N-Term(Acetyl)	1	1	P35579	P35579	0	3	0.5333	0	1	1	627.977	1881.92	1881.92	-1.05	-0.00066	HCD (High Energy Collision Dissociation)	MS2	20.2271	25	48.3109	39881	MS201900090_4_PKA.raw	F4		15	49	42	26.147	0.0004105	0.00738	4.26138e+06	47.89
	FALSE	High	[K].HSQAVEELAEQLEQTK.[R]			4.86781e-09	0	1	1	4	P35579	P35579 [1194-1209]	0	1839.91	0	100		High	High	0	4.469e-08	65	35.51	K.HSQAVEELAEQLEQTK.R	[1194-1209]		Used
		Checked	Confidence	Identifying Node	PSM Ambiguity	Annotated Sequence	Modifications	# Protein Groups	# Proteins	Master Protein Accessions	Protein Accessions	# Missed Cleavages	Charge	DeltaScore	DeltaCn	Rank	Search Engine Rank	m/z [Da]	MH+ [Da]	Theo. MH+ [Da]	DeltaM [ppm]	Deltam/z [Da]	Activation Type	MS Order	Isolation Interference [%]	Ion Inject Time [ms]	RT [min]	First Scan	Spectrum File	File ID	Quan Info	Ions Score	Identity Strict	Identity Relaxed	Expectation Value	Percolator q-Value	Percolator PEP	Precursor Abundance	Apex RT [min]
		FALSE	High	Mascot (A5)	Unambiguous	[K].HSQAVEELAEQLEQTK.[R]		1	1	P35579	P35579	0	3	0.9692	0	1	1	613.975	1839.91	1839.91	1.23	0.00076	HCD (High Energy Collision Dissociation)	MS2	2.15268	7.68	35.7387	25919	MS201900090_4_PKA.raw	F4		65	48	41	0.000220008	0	4.469e-08	84816808	35.51
		FALSE	High	Mascot (A5)	Unambiguous	[K].HSQAVEELAEQLEQTK.[R]		1	1	P35579	P35579	0	3	0.8333	0	1	1	613.973	1839.91	1839.91	-1.34	-0.00082	HCD (High Energy Collision Dissociation)	MS2	95.7672	11.839	35.2728	25425	MS201900090_4_PKA.raw	F4		24	48	42	3.43308	0	1.448e-05	84816808	35.51
		FALSE	High	Mascot (A5)	Unambiguous	[K].HSQAVEELAEQLEQTK.[R]		1	1	P35579	P35579	0	2	1	0	1	1	920.456	1839.9	1839.91	-2.07	-0.00191	HCD (High Energy Collision Dissociation)	MS2	55.2656	25	36.2246	26460	MS201900090_4_PKA.raw	F4		50	48	41	0.00751947	0	9.87e-10	77226696	35.49
		FALSE	High	Mascot (A5)	Unambiguous	[K].HSQAVEELAEQLEQTK.[R]		1	1	P35579	P35579	0	3	0.9516	0	1	1	613.975	1839.91	1839.91	1.12	0.00068	HCD (High Energy Collision Dissociation)	MS2	0	25	36.0479	26264	MS201900090_4_PKA.raw	F4		62	48	41	0.000519772	0	4.919e-07	84816808	35.51
	FALSE	High	[K].KEEELQAALARVEEEAAQK.[N]			2.31137e-06	0	1	1	1	P35579	P35579 [1081-1099]	2	2142.1	0	100		High	High	0	7.741e-07	22	39.17	K.KEEELQAALARVEEEAAQK.N	[1081-1099]		Used
		Checked	Confidence	Identifying Node	PSM Ambiguity	Annotated Sequence	Modifications	# Protein Groups	# Proteins	Master Protein Accessions	Protein Accessions	# Missed Cleavages	Charge	DeltaScore	DeltaCn	Rank	Search Engine Rank	m/z [Da]	MH+ [Da]	Theo. MH+ [Da]	DeltaM [ppm]	Deltam/z [Da]	Activation Type	MS Order	Isolation Interference [%]	Ion Inject Time [ms]	RT [min]	First Scan	Spectrum File	File ID	Quan Info	Ions Score	Identity Strict	Identity Relaxed	Expectation Value	Percolator q-Value	Percolator PEP	Precursor Abundance	Apex RT [min]
		FALSE	High	Mascot (A5)	Unambiguous	[K].KEEELQAALARVEEEAAQK.[N]		1	1	P35579	P35579	2	3	1	0	1	1	714.707	2142.11	2142.1	1.06	0.00076	HCD (High Energy Collision Dissociation)	MS2	31.6726	25	39.0627	29702	MS201900090_4_PKA.raw	F4		22	47	40	3.8648	0	7.741e-07	8070840	39.17
	FALSE	High	[KR].KEEELQAALAR.[LVA]			1.45721e-05	0	3	3	3	P35749; P35579; Q7Z406	P35749 [1088-1098]; P35579 [1081-1091]; Q7Z406 [1105-1115]	1	1257.68	0	100	Shared	High	High	0	1.393e-05	61	17.29	K.KEEELQAALAR.V	[1081-1091]		Used
		Checked	Confidence	Identifying Node	PSM Ambiguity	Annotated Sequence	Modifications	# Protein Groups	# Proteins	Master Protein Accessions	Protein Accessions	# Missed Cleavages	Charge	DeltaScore	DeltaCn	Rank	Search Engine Rank	m/z [Da]	MH+ [Da]	Theo. MH+ [Da]	DeltaM [ppm]	Deltam/z [Da]	Activation Type	MS Order	Isolation Interference [%]	Ion Inject Time [ms]	RT [min]	First Scan	Spectrum File	File ID	Quan Info	Ions Score	Identity Strict	Identity Relaxed	Expectation Value	Percolator q-Value	Percolator PEP	Precursor Abundance	Apex RT [min]
		FALSE	High	Mascot (A5)	Unambiguous	[KR].KEEELQAALAR.[LVA]		3	3	P35749; P35579; Q7Z406	P35749; P35579; Q7Z406	1	2	0.7869	0	1	1	629.344	1257.68	1257.68	0.29	0.00018	HCD (High Energy Collision Dissociation)	MS2	11.5703	15.6	17.178	6430	MS201900090_4_PKA.raw	F4		61	45	38	0.00029802	0	1.393e-05	778738432	17.29
		FALSE	High	Mascot (A5)	Unambiguous	[KR].KEEELQAALAR.[LVA]		3	3	P35749; P35579; Q7Z406	P35749; P35579; Q7Z406	1	2	0.8	0	1	1	629.344	1257.68	1257.68	0.69	0.00044	HCD (High Energy Collision Dissociation)	MS2	68.7479	24.055	17.5998	6897	MS201900090_4_PKA.raw	F4		55	45	38	0.00121674	0	5.682e-06	8800701	17.61
		FALSE	High	Mascot (A5)	Unambiguous	[KR].KEEELQAALAR.[LVA]		3	3	P35749; P35579; Q7Z406	P35749; P35579; Q7Z406	1	2	1	0	1	1	629.344	1257.68	1257.68	0.39	0.00025	HCD (High Energy Collision Dissociation)	MS2	45.2111	25	18.635	8062	MS201900090_4_PKA.raw	F4		17	45	38	7.62509	0.001195	0.02479
	FALSE	High	[K].KANLQIDQINTDLNLER.[S]	1xAcetyl [K1]; 1xAcetyl [N-Term]	P35579 1xAcetyl [K1754]; 1xAcetyl [N-Term]	7.41817e-08	0	1	1	4	P35579	P35579 [1754-1770]	1	2040.07	0	100		High	High	0	1.884e-08	99	42.47	K.KANLQIDQINTDLNLER.S	[1754-1770]	1xAcetyl [K1754]; 1xAcetyl [N-Term]	Used
		Checked	Confidence	Identifying Node	PSM Ambiguity	Annotated Sequence	Modifications	# Protein Groups	# Proteins	Master Protein Accessions	Protein Accessions	# Missed Cleavages	Charge	DeltaScore	DeltaCn	Rank	Search Engine Rank	m/z [Da]	MH+ [Da]	Theo. MH+ [Da]	DeltaM [ppm]	Deltam/z [Da]	Activation Type	MS Order	Isolation Interference [%]	Ion Inject Time [ms]	RT [min]	First Scan	Spectrum File	File ID	Quan Info	Ions Score	Identity Strict	Identity Relaxed	Expectation Value	Percolator q-Value	Percolator PEP	Precursor Abundance	Apex RT [min]
		FALSE	High	Mascot (A5)	Unambiguous	[K].kANLQIDQINTDLNLER.[S]	K1(Acetyl)	1	1	P35579	P35579	1	2	1	0	1	1	1020.54	2040.07	2040.07	-0.93	-0.00095	HCD (High Energy Collision Dissociation)	MS2	52.297	25	44.5607	35887	MS201900090_4_PKA.raw	F4		60	46	39	0.000434593	0	3.822e-08	1.43407e+06	44.41
		FALSE	High	Mascot (A5)	Unambiguous	[K].kANLQIDQINTDLNLER.[S]	N-Term(Acetyl)	1	1	P35579	P35579	1	2	1	0	1	2	1020.54	2040.07	2040.07	-0.93	-0.00095	HCD (High Energy Collision Dissociation)	MS2	52.297	25	44.5607	35887	MS201900090_4_PKA.raw	F4		60	46	39	0.000434593	0	3.822e-08	1.43407e+06	44.41
		FALSE	High	Mascot (A5)	Unambiguous	[K].kANLQIDQINTDLNLER.[S]	K1(Acetyl)	1	1	P35579	P35579	1	2	0.0202	0	1	1	1020.54	2040.07	2040.07	1.02	0.00104	HCD (High Energy Collision Dissociation)	MS2	0	25	42.3432	33399	MS201900090_4_PKA.raw	F4		99	46	39	6.02864e-08	0	1.884e-08	6111205	42.47
		FALSE	High	Mascot (A5)	Unambiguous	[K].kANLQIDQINTDLNLER.[S]	N-Term(Acetyl)	1	1	P35579	P35579	1	2		0.0202	2	2	1020.54	2040.07	2040.07	1.02	0.00104	HCD (High Energy Collision Dissociation)	MS2	0	25	42.3432	33399	MS201900090_4_PKA.raw	F4		97	46	39	8.39884e-08	0	2.123e-08	6111205	42.47
	FALSE	High	[K].KANLQIDQINTDLNLER.[S]			2.6484e-09	0	1	1	7	P35579	P35579 [1754-1770]	1	1998.06	0	100		High	High	0	9.954e-07	88	36.11	K.KANLQIDQINTDLNLER.S	[1754-1770]		Used
		Checked	Confidence	Identifying Node	PSM Ambiguity	Annotated Sequence	Modifications	# Protein Groups	# Proteins	Master Protein Accessions	Protein Accessions	# Missed Cleavages	Charge	DeltaScore	DeltaCn	Rank	Search Engine Rank	m/z [Da]	MH+ [Da]	Theo. MH+ [Da]	DeltaM [ppm]	Deltam/z [Da]	Activation Type	MS Order	Isolation Interference [%]	Ion Inject Time [ms]	RT [min]	First Scan	Spectrum File	File ID	Quan Info	Ions Score	Identity Strict	Identity Relaxed	Expectation Value	Percolator q-Value	Percolator PEP	Precursor Abundance	Apex RT [min]
		FALSE	High	Mascot (A5)	Unambiguous	[K].KANLQIDQINTDLNLER.[S]		1	1	P35579	P35579	1	2	0.6	0	1	1	999.533	1998.06	1998.06	-1.13	-0.00112	HCD (High Energy Collision Dissociation)	MS2	0	25	36.8496	27183	MS201900090_4_PKA.raw	F4		20	46	39	4.63483	0	1.571e-06	6.12306e+06	36.87
		FALSE	High	Mascot (A5)	Unambiguous	[K].KANLQIDQINTDLNLER.[S]		1	1	P35579	P35579	1	2	0.8851	0	1	1	999.533	1998.06	1998.06	-1.09	-0.00109	HCD (High Energy Collision Dissociation)	MS2	0	17.596	36.3749	26639	MS201900090_4_PKA.raw	F4		87	46	39	7.86017e-07	0	5.115e-10	202527568	36.1
		FALSE	High	Mascot (A5)	Unambiguous	[K].KANLQIDQINTDLNLER.[S]		1	1	P35579	P35579	1	3	0.7955	0	1	1	666.692	1998.06	1998.06	0.37	0.00024	HCD (High Energy Collision Dissociation)	MS2	0	19.947	35.9341	26146	MS201900090_4_PKA.raw	F4		88	46	39	6.35641e-07	0	9.954e-07	253848752	36.11
		FALSE	High	Mascot (A5)	Unambiguous	[K].KANLQIDQINTDLNLER.[S]		1	1	P35579	P35579	1	2	0.9863	0	1	1	999.536	1998.06	1998.06	1.73	0.00172	HCD (High Energy Collision Dissociation)	MS2	71.2093	25	34.7353	24815	MS201900090_4_PKA.raw	F4		73	46	39	1.88264e-05	0	3.93e-08
		FALSE	High	Mascot (A5)	Unambiguous	[K].KANLQIDQINTDLNLER.[S]		1	1	P35579	P35579	1	2	0.9828	0	1	1	999.54	1998.07	1998.06	6.02	0.00602	HCD (High Energy Collision Dissociation)	MS2	38.0862	25	38.6396	29213	MS201900090_4_PKA.raw	F4		58	45	38	0.000559937	0	3.444e-07
		FALSE	High	Mascot (A5)	Unambiguous	[K].KANLQIDQINTDLNLER.[S]		1	1	P35579	P35579	1	3	1	0	1	1	666.689	1998.05	1998.06	-3.77	-0.00251	HCD (High Energy Collision Dissociation)	MS2	0	25	37.3546	27728	MS201900090_4_PKA.raw	F4		41	46	39	0.0395985	0.0001341	0.001891	7542903	36.9
		FALSE	High	Mascot (A5)	Unambiguous	[K].KANLQIDQINTDLNLER.[S]		1	1	P35579	P35579	1	3	1	0	1	1	666.695	1998.07	1998.06	4.51	0.003	HCD (High Energy Collision Dissociation)	MS2	37.4687	25	35.4872	25649	MS201900090_4_PKA.raw	F4		16	45	38	10.8328	0.0002495	0.004601	253848752	36.11
	FALSE	High	[K].KMQQNIQELEEQLEEEESAR.[Q]			8.40213e-07	0	1	1	2	P35579	P35579 [940-959]	1	2461.15	0	100		High	High	0	3.127e-07	84	43.27	K.KMQQNIQELEEQLEEEESAR.Q	[940-959]		Used
		Checked	Confidence	Identifying Node	PSM Ambiguity	Annotated Sequence	Modifications	# Protein Groups	# Proteins	Master Protein Accessions	Protein Accessions	# Missed Cleavages	Charge	DeltaScore	DeltaCn	Rank	Search Engine Rank	m/z [Da]	MH+ [Da]	Theo. MH+ [Da]	DeltaM [ppm]	Deltam/z [Da]	Activation Type	MS Order	Isolation Interference [%]	Ion Inject Time [ms]	RT [min]	First Scan	Spectrum File	File ID	Quan Info	Ions Score	Identity Strict	Identity Relaxed	Expectation Value	Percolator q-Value	Percolator PEP	Precursor Abundance	Apex RT [min]
		FALSE	High	Mascot (A5)	Unambiguous	[K].KMQQNIQELEEQLEEEESAR.[Q]		1	1	P35579	P35579	1	3	1	0	1	1	821.055	2461.15	2461.15	0.01	1e-05	HCD (High Energy Collision Dissociation)	MS2	37.4233	22.281	43.5604	34792	MS201900090_4_PKA.raw	F4		52	51	44	0.00916899	0	2.602e-07	26638666	43.27
		FALSE	High	Mascot (A5)	Unambiguous	[K].KMQQNIQELEEQLEEEESAR.[Q]		1	1	P35579	P35579	1	3	0.9643	0	1	1	821.056	2461.15	2461.15	1	0.00082	HCD (High Energy Collision Dissociation)	MS2	25.3575	25	43.0293	34186	MS201900090_4_PKA.raw	F4		84	51	44	5.8688e-06	0	3.127e-07	26638666	43.27
	FALSE	High	[K].KMQQNIQELEEQLEEEESAR.[Q]	1xOxidation [M2]		7.74283e-09	0	1	1	5	P35579	P35579 [940-959]	1	2477.15	0	100		High	High	0	1.634e-09	115	38.39	K.KMQQNIQELEEQLEEEESAR.Q	[940-959]		Used
		Checked	Confidence	Identifying Node	PSM Ambiguity	Annotated Sequence	Modifications	# Protein Groups	# Proteins	Master Protein Accessions	Protein Accessions	# Missed Cleavages	Charge	DeltaScore	DeltaCn	Rank	Search Engine Rank	m/z [Da]	MH+ [Da]	Theo. MH+ [Da]	DeltaM [ppm]	Deltam/z [Da]	Activation Type	MS Order	Isolation Interference [%]	Ion Inject Time [ms]	RT [min]	First Scan	Spectrum File	File ID	Quan Info	Ions Score	Identity Strict	Identity Relaxed	Expectation Value	Percolator q-Value	Percolator PEP	Precursor Abundance	Apex RT [min]
		FALSE	High	Mascot (A5)	Unambiguous	[K].KmQQNIQELEEQLEEEESAR.[Q]	M2(Oxidation)	1	1	P35579	P35579	1	3	0.9217	0	1	1	826.385	2477.14	2477.15	-1.84	-0.00152	HCD (High Energy Collision Dissociation)	MS2	29.0713	25	38.177	28676	MS201900090_4_PKA.raw	F4		115	51	44	5.28787e-09	0	1.634e-09	63472508	38.39
		FALSE	High	Mascot (A5)	Unambiguous	[K].KmQQNIQELEEQLEEEESAR.[Q]	M2(Oxidation)	1	1	P35579	P35579	1	3	0.913	0	1	1	826.385	2477.14	2477.15	-1.68	-0.00139	HCD (High Energy Collision Dissociation)	MS2	4.05192	13.872	38.6714	29252	MS201900090_4_PKA.raw	F4		115	51	45	5.52549e-09	0	1.579e-08	63472508	38.39
		FALSE	High	Mascot (A5)	Unambiguous	[K].KmQQNIQELEEQLEEEESAR.[Q]	M2(Oxidation)	1	1	P35579	P35579	1	3	0.7778	0	1	1	826.387	2477.15	2477.15	0.59	0.00049	HCD (High Energy Collision Dissociation)	MS2	61.5174	25	41.273	32222	MS201900090_4_PKA.raw	F4		9	51	44	219.737	0.0003658	0.006914
		FALSE	High	Mascot (A5)	Unambiguous	[K].KmQQNIQELEEQLEEEESAR.[Q]	M2(Oxidation)	1	1	P35579	P35579	1	3	0.6	0	1	1	826.391	2477.16	2477.15	5.38	0.00444	HCD (High Energy Collision Dissociation)	MS2		25	40.7863	31655	MS201900090_4_PKA.raw	F4		15	51	44	46.4672	0.001534	0.03645	582692	40.88
		FALSE	High	Mascot (A5)	Unambiguous	[K].KmQQNIQELEEQLEEEESAR.[Q]	M2(Oxidation)	1	1	P35579	P35579	1	3	1	0	1	1	826.388	2477.15	2477.15	1.86	0.00154	HCD (High Energy Collision Dissociation)	MS2	0	25	39.2547	29919	MS201900090_4_PKA.raw	F4		11	51	44	132.321	0.002165	0.05344	6.82365e+06	39.03
	FALSE	High	[R].IAEFTTNLTEEEEKSK.[S]	1xAcetyl [N-Term]	P35579 1xAcetyl [N-Term]	1.38048e-08	0	1	1	2	P35579	P35579 [1001-1016]	1	1910.92	0	100		High	High	0	3.054e-09	97	38.94	R.IAEFTTNLTEEEEKSK.S	[1001-1016]	1xAcetyl [N-Term]	Used
		Checked	Confidence	Identifying Node	PSM Ambiguity	Annotated Sequence	Modifications	# Protein Groups	# Proteins	Master Protein Accessions	Protein Accessions	# Missed Cleavages	Charge	DeltaScore	DeltaCn	Rank	Search Engine Rank	m/z [Da]	MH+ [Da]	Theo. MH+ [Da]	DeltaM [ppm]	Deltam/z [Da]	Activation Type	MS Order	Isolation Interference [%]	Ion Inject Time [ms]	RT [min]	First Scan	Spectrum File	File ID	Quan Info	Ions Score	Identity Strict	Identity Relaxed	Expectation Value	Percolator q-Value	Percolator PEP	Precursor Abundance	Apex RT [min]
		FALSE	High	Mascot (A5)	Unambiguous	[R].iAEFTTNLTEEEEKSK.[S]	N-Term(Acetyl)	1	1	P35579	P35579	1	2	0.9897	0	1	1	955.967	1910.93	1910.92	1.93	0.00185	HCD (High Energy Collision Dissociation)	MS2	3.29397	25	38.8643	29478	MS201900090_4_PKA.raw	F4		97	49	42	1.65593e-07	0	3.054e-09	4.40532e+06	38.94
		FALSE	High	Mascot (A5)	Unambiguous	[R].iAEFTTNLTEEEEKSK.[S]	N-Term(Acetyl)	1	1	P35579	P35579	1	2	0.9726	0	1	1	955.967	1910.93	1910.92	1.77	0.00169	HCD (High Energy Collision Dissociation)	MS2	0	25	35.8459	26050	MS201900090_4_PKA.raw	F4		73	49	42	4.77393e-05	0	6.097e-08
	FALSE	High	[R].IAEFTTNLTEEEEKSK.[S]			6.48695e-07	0	1	1	6	P35579	P35579 [1001-1016]	1	1868.91	0	100		High	High	0	1.957e-07	51	24.97	R.IAEFTTNLTEEEEKSK.S	[1001-1016]		Used
		Checked	Confidence	Identifying Node	PSM Ambiguity	Annotated Sequence	Modifications	# Protein Groups	# Proteins	Master Protein Accessions	Protein Accessions	# Missed Cleavages	Charge	DeltaScore	DeltaCn	Rank	Search Engine Rank	m/z [Da]	MH+ [Da]	Theo. MH+ [Da]	DeltaM [ppm]	Deltam/z [Da]	Activation Type	MS Order	Isolation Interference [%]	Ion Inject Time [ms]	RT [min]	First Scan	Spectrum File	File ID	Quan Info	Ions Score	Identity Strict	Identity Relaxed	Expectation Value	Percolator q-Value	Percolator PEP	Precursor Abundance	Apex RT [min]
		FALSE	High	Mascot (A5)	Unambiguous	[R].IAEFTTNLTEEEEKSK.[S]		1	1	P35579	P35579	1	3	0.9412	0	1	1	623.643	1868.91	1868.91	1.09	0.00068	HCD (High Energy Collision Dissociation)	MS2	21.4588	25	24.6936	14456	MS201900090_4_PKA.raw	F4		51	49	42	0.00649525	0	1.957e-07	357659360	24.97
		FALSE	High	Mascot (A5)	Unambiguous	[R].IAEFTTNLTEEEEKSK.[S]		1	1	P35579	P35579	1	3	0.8571	0	1	1	623.642	1868.91	1868.91	0.14	9e-05	HCD (High Energy Collision Dissociation)	MS2	42.0213	25	27.5439	17354	MS201900090_4_PKA.raw	F4		35	49	42	0.267868	0	1.604e-05
		FALSE	High	Mascot (A5)	Unambiguous	[R].IAEFTTNLTEEEEKSK.[S]		1	1	P35579	P35579	1	3	1	0	1	1	623.642	1868.91	1868.91	-0.67	-0.00041	HCD (High Energy Collision Dissociation)	MS2	48.4836	25	26.9277	16661	MS201900090_4_PKA.raw	F4		10	49	42	78.4478	0	9.962e-06	357659360	24.97
		FALSE	High	Mascot (A5)	Unambiguous	[R].IAEFTTNLTEEEEKSK.[S]		1	1	P35579	P35579	1	3	1	0	1	1	623.642	1868.91	1868.91	-0.68	-0.00043	HCD (High Energy Collision Dissociation)	MS2	21.2773	0.592	25.1291	14852	MS201900090_4_PKA.raw	F4		28	49	42	1.29631	8.015e-05	3.306e-05	357659360	24.97
		FALSE	High	Mascot (A5)	Unambiguous	[R].IAEFTTNLTEEEEKSK.[S]		1	1	P35579	P35579	1	3	1	0	1	1	623.642	1868.91	1868.91	-0.28	-0.00018	HCD (High Energy Collision Dissociation)	MS2	70.7153	17.975	26.4432	16137	MS201900090_4_PKA.raw	F4		2	49	42	523.078	8.015e-05	3.953e-05	357659360	24.97
		FALSE	High	Mascot (A5)	Unambiguous	[R].IAEFTTNLTEEEEKSK.[S]		1	1	P35579	P35579	1	3	1	0	1	1	623.642	1868.91	1868.91	0.06	4e-05	HCD (High Energy Collision Dissociation)	MS2	69.6822	25	28.0309	17896	MS201900090_4_PKA.raw	F4		4	49	42	334.295	8.015e-05	4.558e-05
	FALSE	High	[R].IAEFTTNLTEEEEK.[S]	1xAcetyl [N-Term]	P35579 1xAcetyl [N-Term]	1.5952e-08	0	1	1	5	P35579	P35579 [1001-1014]	0	1695.8	0	100		High	High	0	3.554e-09	94	47.83	R.IAEFTTNLTEEEEK.S	[1001-1014]	1xAcetyl [N-Term]	Used
		Checked	Confidence	Identifying Node	PSM Ambiguity	Annotated Sequence	Modifications	# Protein Groups	# Proteins	Master Protein Accessions	Protein Accessions	# Missed Cleavages	Charge	DeltaScore	DeltaCn	Rank	Search Engine Rank	m/z [Da]	MH+ [Da]	Theo. MH+ [Da]	DeltaM [ppm]	Deltam/z [Da]	Activation Type	MS Order	Isolation Interference [%]	Ion Inject Time [ms]	RT [min]	First Scan	Spectrum File	File ID	Quan Info	Ions Score	Identity Strict	Identity Relaxed	Expectation Value	Percolator q-Value	Percolator PEP	Precursor Abundance	Apex RT [min]
		FALSE	High	Mascot (A5)	Unambiguous	[R].iAEFTTNLTEEEEK.[S]	N-Term(Acetyl)	1	1	P35579	P35579	0	2	0.9762	0	1	1	848.417	1695.83	1695.8	17.89	0.01517	HCD (High Energy Collision Dissociation)	MS2	56.3857	25	44.4821	35811	MS201900090_4_PKA.raw	F4		42	48	41	0.048961	0	2.158e-05
		FALSE	High	Mascot (A5)	Unambiguous	[R].iAEFTTNLTEEEEK.[S]	N-Term(Acetyl)	1	1	P35579	P35579	0	2	0.961	0	1	1	848.402	1695.8	1695.8	0.28	0.00024	HCD (High Energy Collision Dissociation)	MS2	75.5532	25	47.6488	39171	MS201900090_4_PKA.raw	F4		77	48	41	1.45972e-05	0	6.759e-07	5.21746e+06	47.83
		FALSE	High	Mascot (A5)	Unambiguous	[R].iAEFTTNLTEEEEK.[S]	N-Term(Acetyl)	1	1	P35579	P35579	0	2	0.9787	0	1	1	848.401	1695.8	1695.8	-0.22	-0.00019	HCD (High Energy Collision Dissociation)	MS2	55.086	25	47.7214	39242	MS201900090_4_PKA.raw	F4		94	48	41	2.81513e-07	0	3.554e-09	5.21746e+06	47.83
		FALSE	High	Mascot (A5)	Unambiguous	[R].iAEFTTNLTEEEEK.[S]	N-Term(Acetyl)	1	1	P35579	P35579	0	2	1	0	1	1	848.397	1695.79	1695.8	-5.29	-0.00448	HCD (High Energy Collision Dissociation)	MS2	9.52956	25	44.5569	35882	MS201900090_4_PKA.raw	F4		34	48	41	0.300901	0	4.451e-06	746127	44.51
		FALSE	High	Mascot (A5)	Unambiguous	[R].iAEFTTNLTEEEEK.[S]	N-Term(Acetyl)	1	1	P35579	P35579	0	2	0.3	0	1	1	848.416	1695.82	1695.8	16.93	0.01436	HCD (High Energy Collision Dissociation)	MS2	0	25	48.1062	39647	MS201900090_4_PKA.raw	F4		10	48	41	75.7282	0.0001341	0.001697
	FALSE	High	[R].IAEFTTNLTEEEEK.[S]			1.28657e-06	0	1	1	9	P35579	P35579 [1001-1014]	0	1653.79	0	100		High	High	0	4.127e-07	98	31.06	R.IAEFTTNLTEEEEK.S	[1001-1014]		Used
		Checked	Confidence	Identifying Node	PSM Ambiguity	Annotated Sequence	Modifications	# Protein Groups	# Proteins	Master Protein Accessions	Protein Accessions	# Missed Cleavages	Charge	DeltaScore	DeltaCn	Rank	Search Engine Rank	m/z [Da]	MH+ [Da]	Theo. MH+ [Da]	DeltaM [ppm]	Deltam/z [Da]	Activation Type	MS Order	Isolation Interference [%]	Ion Inject Time [ms]	RT [min]	First Scan	Spectrum File	File ID	Quan Info	Ions Score	Identity Strict	Identity Relaxed	Expectation Value	Percolator q-Value	Percolator PEP	Precursor Abundance	Apex RT [min]
		FALSE	High	Mascot (A5)	Unambiguous	[R].IAEFTTNLTEEEEK.[S]		1	1	P35579	P35579	0	2	0.9733	0	1	1	827.401	1653.8	1653.79	6.07	0.00502	HCD (High Energy Collision Dissociation)	MS2	0	25	30.856	21001	MS201900090_4_PKA.raw	F4		75	48	41	2.34878e-05	0	4.679e-07	550460032	31.06
		FALSE	High	Mascot (A5)	Unambiguous	[R].IAEFTTNLTEEEEK.[S]		1	1	P35579	P35579	0	2	0.9184	0	1	1	827.397	1653.79	1653.79	0.26	0.00022	HCD (High Energy Collision Dissociation)	MS2	0	4.011	31.3418	21512	MS201900090_4_PKA.raw	F4		98	48	41	1.32873e-07	0	4.127e-07	550460032	31.06
		FALSE	High	Mascot (A5)	Unambiguous	[R].IAEFTTNLTEEEEK.[S]		1	1	P35579	P35579	0	2	0.9348	0	1	1	827.396	1653.79	1653.79	-0.08	-6e-05	HCD (High Energy Collision Dissociation)	MS2	0	25	31.7649	21969	MS201900090_4_PKA.raw	F4		92	48	41	4.29927e-07	0	7.958e-07	8613943	31.71
		FALSE	High	Mascot (A5)	Unambiguous	[R].IAEFTTNLTEEEEK.[S]		1	1	P35579	P35579	0	2	0.9167	0	1	1	827.394	1653.78	1653.79	-2.26	-0.00187	HCD (High Energy Collision Dissociation)	MS2	0	25	32.3155	22377	MS201900090_4_PKA.raw	F4		60	48	41	0.000696092	0	5.849e-06	3.05926e+06	32.35
		FALSE	High	Mascot (A5)	Unambiguous	[R].IAEFTTNLTEEEEK.[S]		1	1	P35579	P35579	0	2	0.8983	0	1	1	827.394	1653.78	1653.79	-2.75	-0.00228	HCD (High Energy Collision Dissociation)	MS2	0	25	32.899	23001	MS201900090_4_PKA.raw	F4		59	48	41	0.000914232	0	6.202e-07	3.05926e+06	32.35
		FALSE	High	Mascot (A5)	Unambiguous	[R].IAEFTTNLTEEEEK.[S]		1	1	P35579	P35579	0	2	0.9512	0	1	1	827.385	1653.76	1653.79	-14.24	-0.01177	HCD (High Energy Collision Dissociation)	MS2		25	35.2616	25413	MS201900090_4_PKA.raw	F4		41	48	41	0.0574054	0	2.131e-06
		FALSE	High	Mascot (A5)	Unambiguous	[R].IAEFTTNLTEEEEK.[S]		1	1	P35579	P35579	0	2	0.9	0	1	1	827.393	1653.78	1653.79	-3.47	-0.00287	HCD (High Energy Collision Dissociation)	MS2	54.9527	25	35.1969	25339	MS201900090_4_PKA.raw	F4		40	48	41	0.0722965	8.015e-05	0.0002519
		FALSE	High	Mascot (A5)	Unambiguous	[R].IAEFTTNLTEEEEK.[S]		1	1	P35579	P35579	0	2	1	0	1	1	827.398	1653.79	1653.79	2.21	0.00183	HCD (High Energy Collision Dissociation)	MS2	25.3292	25	33.4739	23479	MS201900090_4_PKA.raw	F4		23	48	41	4.07295	8.015e-05	8.079e-05
		FALSE	High	Mascot (A5)	Unambiguous	[R].IAEFTTNLTEEEEK.[S]		1	1	P35579	P35579	0	2	1	0	1	1	827.396	1653.79	1653.79	0.15	0.00013	HCD (High Energy Collision Dissociation)	MS2	58.5416	25	34.0236	24022	MS201900090_4_PKA.raw	F4		27	48	41	1.35167	8.015e-05	0.0001213	3241064	33.56
	FALSE	High	[K].KMQQNIQELEEQLEEEESAR.[Q]	1xAcetyl [K1]; 1xOxidation [M2]; 1xAcetyl [N-Term]	P35579 1xAcetyl [K940]; 1xAcetyl [N-Term]	1.02689e-05	0	1	1	4	P35579	P35579 [940-959]	1	2519.16	0	100		High	High	0	3.898e-06	37	45.42	K.KMQQNIQELEEQLEEEESAR.Q	[940-959]	1xAcetyl [K940]; 1xAcetyl [N-Term]	Used
		Checked	Confidence	Identifying Node	PSM Ambiguity	Annotated Sequence	Modifications	# Protein Groups	# Proteins	Master Protein Accessions	Protein Accessions	# Missed Cleavages	Charge	DeltaScore	DeltaCn	Rank	Search Engine Rank	m/z [Da]	MH+ [Da]	Theo. MH+ [Da]	DeltaM [ppm]	Deltam/z [Da]	Activation Type	MS Order	Isolation Interference [%]	Ion Inject Time [ms]	RT [min]	First Scan	Spectrum File	File ID	Quan Info	Ions Score	Identity Strict	Identity Relaxed	Expectation Value	Percolator q-Value	Percolator PEP	Precursor Abundance	Apex RT [min]
		FALSE	High	Mascot (A5)	Unambiguous	[K].kmQQNIQELEEQLEEEESAR.[Q]	K1(Acetyl); M2(Oxidation)	1	1	P35579	P35579	1	3	1	0	1	1	840.385	2519.14	2519.16	-6.94	-0.00582	HCD (High Energy Collision Dissociation)	MS2	68.302	25	45.3631	36608	MS201900090_4_PKA.raw	F4		37	52	45	0.352586	0	3.898e-06	2.29957e+06	45.42
		FALSE	High	Mascot (A5)	Unambiguous	[K].kmQQNIQELEEQLEEEESAR.[Q]	N-Term(Acetyl); M2(Oxidation)	1	1	P35579	P35579	1	3	1	0	1	2	840.385	2519.14	2519.16	-6.94	-0.00582	HCD (High Energy Collision Dissociation)	MS2	68.302	25	45.3631	36608	MS201900090_4_PKA.raw	F4		37	52	45	0.352586	0	3.898e-06	2.29957e+06	45.42
		FALSE	High	Mascot (A5)	Unambiguous	[K].kmQQNIQELEEQLEEEESAR.[Q]	K1(Acetyl); M2(Oxidation)	1	1	P35579	P35579	1	3	1	0	1	1	840.388	2519.15	2519.16	-2.5	-0.0021	HCD (High Energy Collision Dissociation)	MS2	61.9755	25	45.4031	36642	MS201900090_4_PKA.raw	F4		23	52	45	7.42901	0	1.964e-05	2.29957e+06	45.42
		FALSE	High	Mascot (A5)	Unambiguous	[K].kmQQNIQELEEQLEEEESAR.[Q]	N-Term(Acetyl); M2(Oxidation)	1	1	P35579	P35579	1	3	1	0	1	2	840.388	2519.15	2519.16	-2.5	-0.0021	HCD (High Energy Collision Dissociation)	MS2	61.9755	25	45.4031	36642	MS201900090_4_PKA.raw	F4		23	52	45	7.42901	0	1.964e-05	2.29957e+06	45.42
	FALSE	High	[K].KMQQNIQELEEQLEEEESAR.[Q]	1xAcetyl [N-Term]; 1xAcetyl [K1]	P35579 1xAcetyl [K940]; 1xAcetyl [N-Term]	2.10375e-07	0	1	1	4	P35579	P35579 [940-959]	1	2503.16	0	100		High	High	0	5.821e-08	66	52.67	K.KMQQNIQELEEQLEEEESAR.Q	[940-959]	1xAcetyl [K940]; 1xAcetyl [N-Term]	Used
		Checked	Confidence	Identifying Node	PSM Ambiguity	Annotated Sequence	Modifications	# Protein Groups	# Proteins	Master Protein Accessions	Protein Accessions	# Missed Cleavages	Charge	DeltaScore	DeltaCn	Rank	Search Engine Rank	m/z [Da]	MH+ [Da]	Theo. MH+ [Da]	DeltaM [ppm]	Deltam/z [Da]	Activation Type	MS Order	Isolation Interference [%]	Ion Inject Time [ms]	RT [min]	First Scan	Spectrum File	File ID	Quan Info	Ions Score	Identity Strict	Identity Relaxed	Expectation Value	Percolator q-Value	Percolator PEP	Precursor Abundance	Apex RT [min]
		FALSE	High	Mascot (A5)	Unambiguous	[K].kMQQNIQELEEQLEEEESAR.[Q]	N-Term(Acetyl)	1	1	P35579	P35579	1	3	0.9697	0	1	2	835.058	2503.16	2503.16	-0.5	-0.00042	HCD (High Energy Collision Dissociation)	MS2	44.6478	25	52.6715	44716	MS201900090_4_PKA.raw	F4		66	51	44	0.000433109	0	5.821e-08	1.23048e+06	52.67
		FALSE	High	Mascot (A5)	Unambiguous	[K].kMQQNIQELEEQLEEEESAR.[Q]	K1(Acetyl)	1	1	P35579	P35579	1	3	0.9697	0	1	1	835.058	2503.16	2503.16	-0.5	-0.00042	HCD (High Energy Collision Dissociation)	MS2	44.6478	25	52.6715	44716	MS201900090_4_PKA.raw	F4		66	51	44	0.000433109	0	5.821e-08	1.23048e+06	52.67
		FALSE	High	Mascot (A5)	Unambiguous	[K].kMQQNIQELEEQLEEEESAR.[Q]	N-Term(Acetyl)	1	1	P35579	P35579	1	3	1	0	1	2	835.06	2503.17	2503.16	1.36	0.00113	HCD (High Energy Collision Dissociation)	MS2	32.7036	25	53.5626	45712	MS201900090_4_PKA.raw	F4		8	51	44	221.502	8.015e-05	0.0004123
		FALSE	High	Mascot (A5)	Unambiguous	[K].kMQQNIQELEEQLEEEESAR.[Q]	K1(Acetyl)	1	1	P35579	P35579	1	3	1	0	1	1	835.06	2503.17	2503.16	1.36	0.00113	HCD (High Energy Collision Dissociation)	MS2	32.7036	25	53.5626	45712	MS201900090_4_PKA.raw	F4		8	51	44	221.502	8.015e-05	0.0004123
	FALSE	High	[K].KQELEEICHDLEAR.[V]			1.73103e-06	0	1	1	1	P35579	P35579 [910-923]	1	1712.83	0		No Quan Values	High	High	0	5.681e-07	40		K.KQELEEICHDLEAR.V	[910-923]		Not Used
		Checked	Confidence	Identifying Node	PSM Ambiguity	Annotated Sequence	Modifications	# Protein Groups	# Proteins	Master Protein Accessions	Protein Accessions	# Missed Cleavages	Charge	DeltaScore	DeltaCn	Rank	Search Engine Rank	m/z [Da]	MH+ [Da]	Theo. MH+ [Da]	DeltaM [ppm]	Deltam/z [Da]	Activation Type	MS Order	Isolation Interference [%]	Ion Inject Time [ms]	RT [min]	First Scan	Spectrum File	File ID	Quan Info	Ions Score	Identity Strict	Identity Relaxed	Expectation Value	Percolator q-Value	Percolator PEP	Precursor Abundance	Apex RT [min]
		FALSE	High	Mascot (A5)	Unambiguous	[K].KQELEEICHDLEAR.[V]		1	1	P35579	P35579	1	3	0.85	0	1	1	571.613	1712.83	1712.83	-1.27	-0.00073	HCD (High Energy Collision Dissociation)	MS2	61.5962	25	29.5741	19616	MS201900090_4_PKA.raw	F4		40	48	41	0.0766344	0	5.681e-07	1005921	29.53
	FALSE	High	[K].KVEAQLQELQVK.[F]			1.60871e-05	0	1	1	4	P35579	P35579 [1249-1260]	1	1412.81	0	100		High	High	0	6.34e-06	84	20.48	K.KVEAQLQELQVK.F	[1249-1260]		Used
		Checked	Confidence	Identifying Node	PSM Ambiguity	Annotated Sequence	Modifications	# Protein Groups	# Proteins	Master Protein Accessions	Protein Accessions	# Missed Cleavages	Charge	DeltaScore	DeltaCn	Rank	Search Engine Rank	m/z [Da]	MH+ [Da]	Theo. MH+ [Da]	DeltaM [ppm]	Deltam/z [Da]	Activation Type	MS Order	Isolation Interference [%]	Ion Inject Time [ms]	RT [min]	First Scan	Spectrum File	File ID	Quan Info	Ions Score	Identity Strict	Identity Relaxed	Expectation Value	Percolator q-Value	Percolator PEP	Precursor Abundance	Apex RT [min]
		FALSE	High	Mascot (A5)	Unambiguous	[K].KVEAQLQELQVK.[F]		1	1	P35579	P35579	1	2	0.8833	0	1	1	706.911	1412.81	1412.81	2.26	0.00159	HCD (High Energy Collision Dissociation)	MS2	0	25	21.3733	10936	MS201900090_4_PKA.raw	F4		60	42	35	0.000180889	0	8.455e-06	368870720	20.48
		FALSE	High	Mascot (A5)	Unambiguous	[K].KVEAQLQELQVK.[F]		1	1	P35579	P35579	1	2	0.881	0	1	1	706.909	1412.81	1412.81	0.13	9e-05	HCD (High Energy Collision Dissociation)	MS2	7.55278	13.5	20.842	10344	MS201900090_4_PKA.raw	F4		84	42	35	7.59761e-07	0	6.34e-06	368870720	20.48
		FALSE	High	Mascot (A5)	Unambiguous	[K].KVEAQLQELQVK.[F]		1	1	P35579	P35579	1	2	0.85	0	1	1	706.91	1412.81	1412.81	1.35	0.00096	HCD (High Energy Collision Dissociation)	MS2	23.2177	25	21.9397	11586	MS201900090_4_PKA.raw	F4		40	42	35	0.0206868	8.015e-05	0.0004241
		FALSE	High	Mascot (A5)	Unambiguous	[K].KVEAQLQELQVK.[F]		1	1	P35579	P35579	1	3	0.7391	0	1	1	471.609	1412.81	1412.81	0.85	0.0004	HCD (High Energy Collision Dissociation)	MS2	72.7318	25	20.3504	9801	MS201900090_4_PKA.raw	F4		46	42	35	0.00543154	0.0007363	0.01381	107894400	20.49
	FALSE	High	[K].NFINNPLAQADWAAK.[K]	1xAcetyl [N-Term]	P35579 1xAcetyl [N-Term]	1.44904e-07	0	1	1	6	P35579	P35579 [15-29]	0	1714.85	0	100		High	High	0	2.651e-07	100	62.79	K.NFINNPLAQADWAAK.K	[15-29]	1xAcetyl [N-Term]	Used
		Checked	Confidence	Identifying Node	PSM Ambiguity	Annotated Sequence	Modifications	# Protein Groups	# Proteins	Master Protein Accessions	Protein Accessions	# Missed Cleavages	Charge	DeltaScore	DeltaCn	Rank	Search Engine Rank	m/z [Da]	MH+ [Da]	Theo. MH+ [Da]	DeltaM [ppm]	Deltam/z [Da]	Activation Type	MS Order	Isolation Interference [%]	Ion Inject Time [ms]	RT [min]	First Scan	Spectrum File	File ID	Quan Info	Ions Score	Identity Strict	Identity Relaxed	Expectation Value	Percolator q-Value	Percolator PEP	Precursor Abundance	Apex RT [min]
		FALSE	High	Mascot (A5)	Unambiguous	[K].nFINNPLAQADWAAK.[K]	N-Term(Acetyl)	1	1	P35579	P35579	0	2	1	0	1	1	857.931	1714.85	1714.85	-0.06	-5e-05	HCD (High Energy Collision Dissociation)	MS2	56.5669	25	63.5895	56784	MS201900090_4_PKA.raw	F4		36	48	41	0.154449	0	9.156e-08	1.96993e+06	63.94
		FALSE	High	Mascot (A5)	Unambiguous	[K].nFINNPLAQADWAAK.[K]	N-Term(Acetyl)	1	1	P35579	P35579	0	2	0.98	0	1	1	857.931	1714.85	1714.85	-0.14	-0.00012	HCD (High Energy Collision Dissociation)	MS2	0	25	62.5887	55610	MS201900090_4_PKA.raw	F4		100	48	41	7.34795e-08	0	2.651e-07	7349395	62.79
		FALSE	High	Mascot (A5)	Unambiguous	[K].nFINNPLAQADWAAK.[K]	N-Term(Acetyl)	1	1	P35579	P35579	0	2	0.9846	0	1	1	857.931	1714.85	1714.85	-0.12	-0.0001	HCD (High Energy Collision Dissociation)	MS2	0	25	64.0839	57367	MS201900090_4_PKA.raw	F4		65	48	41	0.00023078	0	1.72e-07	1.96993e+06	63.94
		FALSE	High	Mascot (A5)	Unambiguous	[K].nFINNPLAQADWAAK.[K]	N-Term(Acetyl)	1	1	P35579	P35579	0	2	1	0	1	1	857.93	1714.85	1714.85	-0.63	-0.00054	HCD (High Energy Collision Dissociation)	MS2	3.37687	25	63.0842	56187	MS201900090_4_PKA.raw	F4		89	48	41	8.44523e-07	0	3.888e-08	7349395	62.79
		FALSE	High	Mascot (A5)	Unambiguous	[K].nFINNPLAQADWAAK.[K]	N-Term(Acetyl)	1	1	P35579	P35579	0	2	1	0	1	1	857.93	1714.85	1714.85	-1.31	-0.00113	HCD (High Energy Collision Dissociation)	MS2	17.7887	25	64.5843	57958	MS201900090_4_PKA.raw	F4		53	48	41	0.00311597	0	2.007e-06	1.96993e+06	63.94
		FALSE	High	Mascot (A5)	Unambiguous	[K].nFINNPLAQADWAAK.[K]	N-Term(Acetyl)	1	1	P35579	P35579	0	2	0.8571	0	1	1	857.932	1714.86	1714.85	0.87	0.00075	HCD (High Energy Collision Dissociation)	MS2	0	25	49.9007	41667	MS201900090_4_PKA.raw	F4		42	48	41	0.0385825	8.015e-05	5.289e-05	1.2648e+06	49.84
	FALSE	High	[R].TVGQLYKEQLAK.[L]			3.19055e-05	0	1	1	2	P35579	P35579 [645-656]	1	1377.77	1	100		High	High	0	1.324e-05	57	17.48	R.TVGQLYKEQLAK.L	[645-656]		Used
		Checked	Confidence	Identifying Node	PSM Ambiguity	Annotated Sequence	Modifications	# Protein Groups	# Proteins	Master Protein Accessions	Protein Accessions	# Missed Cleavages	Charge	DeltaScore	DeltaCn	Rank	Search Engine Rank	m/z [Da]	MH+ [Da]	Theo. MH+ [Da]	DeltaM [ppm]	Deltam/z [Da]	Activation Type	MS Order	Isolation Interference [%]	Ion Inject Time [ms]	RT [min]	First Scan	Spectrum File	File ID	Quan Info	Ions Score	Identity Strict	Identity Relaxed	Expectation Value	Percolator q-Value	Percolator PEP	Precursor Abundance	Apex RT [min]
		FALSE	High	Mascot (A5)	Unambiguous	[R].TVGQLYKEQLAK.[L]		1	1	P35579	P35579	1	2	0.0702	0	1	1	689.39	1377.77	1377.77	-1	-0.00069	HCD (High Energy Collision Dissociation)	MS2	0	25	17.3773	6651	MS201900090_4_PKA.raw	F4		57	43	36	0.00038183	0	1.324e-05	77008160	17.48
		FALSE	High	Mascot (A5)	Selected	[R].TVGQLYKEQLAK.[L]		1	1	P35579	P35579	1	2	0	0	1	1	689.391	1377.77	1377.77	0.34	0.00023	HCD (High Energy Collision Dissociation)	MS2	8.47451	21.539	17.8473	7157	MS201900090_4_PKA.raw	F4		38	43	36	0.030213	8.015e-05	0.0001446	77008160	17.48
	FALSE	High	[K].VEDMAELTCLNEASVLHNLK.[DE]	1xPhospho [T8]; 1xOxidation [M4]	P35580 1xPhospho [T94]; P35579 1xPhospho [T90]	1.22916e-06	0	2	2	1	P35580; P35579	P35580 [87-106]; P35579 [83-102]	0	2325.05	0	100	Shared	High	High	0	3.901e-07	63	50.67	K.VEDMAELTCLNEASVLHNLK.E	[83-102]	1xPhospho [T90]	Used
		Checked	Confidence	Identifying Node	PSM Ambiguity	Annotated Sequence	Modifications	# Protein Groups	# Proteins	Master Protein Accessions	Protein Accessions	# Missed Cleavages	Charge	DeltaScore	DeltaCn	Rank	Search Engine Rank	m/z [Da]	MH+ [Da]	Theo. MH+ [Da]	DeltaM [ppm]	Deltam/z [Da]	Activation Type	MS Order	Isolation Interference [%]	Ion Inject Time [ms]	RT [min]	First Scan	Spectrum File	File ID	Quan Info	Ions Score	Identity Strict	Identity Relaxed	Expectation Value	Percolator q-Value	Percolator PEP	Precursor Abundance	Apex RT [min]
		FALSE	High	Mascot (A5)	Unambiguous	[K].VEDmAELtCLNEASVLHNLK.[DE]	M4(Oxidation); T8(Phospho)	2	2	P35580; P35579	P35580; P35579	0	2	0.7302	0	1	1	1163.02	2325.04	2325.05	-3.45	-0.00401	HCD (High Energy Collision Dissociation)	MS2	0	25	50.5272	42382	MS201900090_4_PKA.raw	F4		63	51	44	0.000788609	0	3.901e-07	4894329	50.67
	FALSE	High	[K].VEDMAELTCLNEASVLHNLK.[DE]	1xPropionamide [C9]; 1xOxidation [M4]		1.81188e-06	0	2	2	1	P35580; P35579	P35580 [87-106]; P35579 [83-102]	0	2316.12	0	100	Shared	High	High	0	5.942e-07	38	41.75	K.VEDMAELTCLNEASVLHNLK.E	[83-102]		Used
		Checked	Confidence	Identifying Node	PSM Ambiguity	Annotated Sequence	Modifications	# Protein Groups	# Proteins	Master Protein Accessions	Protein Accessions	# Missed Cleavages	Charge	DeltaScore	DeltaCn	Rank	Search Engine Rank	m/z [Da]	MH+ [Da]	Theo. MH+ [Da]	DeltaM [ppm]	Deltam/z [Da]	Activation Type	MS Order	Isolation Interference [%]	Ion Inject Time [ms]	RT [min]	First Scan	Spectrum File	File ID	Quan Info	Ions Score	Identity Strict	Identity Relaxed	Expectation Value	Percolator q-Value	Percolator PEP	Precursor Abundance	Apex RT [min]
		FALSE	High	Mascot (A5)	Unambiguous	[K].VEDmAELTcLNEASVLHNLK.[DE]	M4(Oxidation); C9(Propionamide)	2	2	P35580; P35579	P35580; P35579	0	3	1	0	1	1	772.713	2316.12	2316.12	1.15	0.00089	HCD (High Energy Collision Dissociation)	MS2	69.1117	25	41.6465	32646	MS201900090_4_PKA.raw	F4		38	50	43	0.198822	0	5.942e-07	3.07479e+06	41.75
	FALSE	High	[K].VEDMAELTCLNEASVLHNLK.[DE]	1xPhospho [T8]	P35580 1xPhospho [T94]; P35579 1xPhospho [T90]	1.30004e-05	0	2	2	1	P35580; P35579	P35580 [87-106]; P35579 [83-102]	0	2309.06	0	100	Shared	High	High	0	5.003e-06	43	58.34	K.VEDMAELTCLNEASVLHNLK.E	[83-102]	1xPhospho [T90]	Used
		Checked	Confidence	Identifying Node	PSM Ambiguity	Annotated Sequence	Modifications	# Protein Groups	# Proteins	Master Protein Accessions	Protein Accessions	# Missed Cleavages	Charge	DeltaScore	DeltaCn	Rank	Search Engine Rank	m/z [Da]	MH+ [Da]	Theo. MH+ [Da]	DeltaM [ppm]	Deltam/z [Da]	Activation Type	MS Order	Isolation Interference [%]	Ion Inject Time [ms]	RT [min]	First Scan	Spectrum File	File ID	Quan Info	Ions Score	Identity Strict	Identity Relaxed	Expectation Value	Percolator q-Value	Percolator PEP	Precursor Abundance	Apex RT [min]
		FALSE	High	Mascot (A5)	Unambiguous	[K].VEDMAELtCLNEASVLHNLK.[DE]	T8(Phospho)	2	2	P35580; P35579	P35580; P35579	0	2	0.7907	0	1	1	1155.02	2309.04	2309.06	-6.52	-0.00752	HCD (High Energy Collision Dissociation)	MS2	61.1997	25	58.1291	50536	MS201900090_4_PKA.raw	F4		43	51	44	0.065127	0	5.003e-06	4398589	58.34
	FALSE	High	[K].VEDMAELTCLNEASVLHNLK.[DE]	1xPropionamide [C9]		1.53133e-09	0	2	2	1	P35580; P35579	P35580 [87-106]; P35579 [83-102]	0	2300.13	0	100	Shared	High	High	0	2.821e-10	107	49.4	K.VEDMAELTCLNEASVLHNLK.E	[83-102]		Used
		Checked	Confidence	Identifying Node	PSM Ambiguity	Annotated Sequence	Modifications	# Protein Groups	# Proteins	Master Protein Accessions	Protein Accessions	# Missed Cleavages	Charge	DeltaScore	DeltaCn	Rank	Search Engine Rank	m/z [Da]	MH+ [Da]	Theo. MH+ [Da]	DeltaM [ppm]	Deltam/z [Da]	Activation Type	MS Order	Isolation Interference [%]	Ion Inject Time [ms]	RT [min]	First Scan	Spectrum File	File ID	Quan Info	Ions Score	Identity Strict	Identity Relaxed	Expectation Value	Percolator q-Value	Percolator PEP	Precursor Abundance	Apex RT [min]
		FALSE	High	Mascot (A5)	Unambiguous	[K].VEDMAELTcLNEASVLHNLK.[DE]	C9(Propionamide)	2	2	P35580; P35579	P35580; P35579	0	2	1	0	1	1	1150.57	2300.12	2300.13	-1.31	-0.00151	HCD (High Energy Collision Dissociation)	MS2	0	25	49.3545	41076	MS201900090_4_PKA.raw	F4		107	50	43	2.02414e-08	0	2.821e-10	682106	49.4
	FALSE	High	[K].VDYKADEWLMK.[N]			2.57837e-05	0	2	2	2	P35580; P35579	P35580 [584-594]; P35579 [577-587]	1	1397.68	0	100	Shared	High	High	8.015e-05	3.508e-05	92	31.76	K.VDYKADEWLMK.N	[577-587]		Used
		Checked	Confidence	Identifying Node	PSM Ambiguity	Annotated Sequence	Modifications	# Protein Groups	# Proteins	Master Protein Accessions	Protein Accessions	# Missed Cleavages	Charge	DeltaScore	DeltaCn	Rank	Search Engine Rank	m/z [Da]	MH+ [Da]	Theo. MH+ [Da]	DeltaM [ppm]	Deltam/z [Da]	Activation Type	MS Order	Isolation Interference [%]	Ion Inject Time [ms]	RT [min]	First Scan	Spectrum File	File ID	Quan Info	Ions Score	Identity Strict	Identity Relaxed	Expectation Value	Percolator q-Value	Percolator PEP	Precursor Abundance	Apex RT [min]
		FALSE	High	Mascot (A5)	Unambiguous	[K].VDYKADEWLMK.[N]		2	2	P35580; P35579	P35580; P35579	1	2	1	0	1	1	699.341	1397.68	1397.68	-0.98	-0.00069	HCD (High Energy Collision Dissociation)	MS2	23.2173	25	32.3546	22402	MS201900090_4_PKA.raw	F4		50	47	40	0.00527179	0	1.053e-05
		FALSE	High	Mascot (A5)	Unambiguous	[K].VDYKADEWLMK.[N]		2	2	P35580; P35579	P35580; P35579	1	2	0.9565	0	1	1	699.34	1397.67	1397.68	-2.33	-0.00163	HCD (High Energy Collision Dissociation)	MS2	0	25	31.6297	21849	MS201900090_4_PKA.raw	F4		92	47	40	3.86426e-07	8.015e-05	3.508e-05	101544576	31.76
	FALSE	High	[K].TLEEEAKTHEAQIQEMR.[Q]	1xOxidation [M16]		1.568e-06	0	1	1	5	P35579	P35579 [1175-1191]	1	2058.98	0	100		High	High	0	5.113e-07	46	18.57	K.TLEEEAKTHEAQIQEMR.Q	[1175-1191]		Used
		Checked	Confidence	Identifying Node	PSM Ambiguity	Annotated Sequence	Modifications	# Protein Groups	# Proteins	Master Protein Accessions	Protein Accessions	# Missed Cleavages	Charge	DeltaScore	DeltaCn	Rank	Search Engine Rank	m/z [Da]	MH+ [Da]	Theo. MH+ [Da]	DeltaM [ppm]	Deltam/z [Da]	Activation Type	MS Order	Isolation Interference [%]	Ion Inject Time [ms]	RT [min]	First Scan	Spectrum File	File ID	Quan Info	Ions Score	Identity Strict	Identity Relaxed	Expectation Value	Percolator q-Value	Percolator PEP	Precursor Abundance	Apex RT [min]
		FALSE	High	Mascot (A5)	Unambiguous	[K].TLEEEAKTHEAQIQEmR.[Q]	M16(Oxidation)	1	1	P35579	P35579	1	3	0.9	0	1	1	686.996	2058.97	2058.98	-0.95	-0.00065	HCD (High Energy Collision Dissociation)	MS2	39.8533	7.322	18.3652	7750	MS201900090_4_PKA.raw	F4		30	50	43	1.15434	0	1.03e-05	247624128	18.57
		FALSE	High	Mascot (A5)	Unambiguous	[K].TLEEEAKTHEAQIQEmR.[Q]	M16(Oxidation)	1	1	P35579	P35579	1	3	1	0	1	1	686.997	2058.98	2058.98	0.01	1e-05	HCD (High Energy Collision Dissociation)	MS2	1.30157	2.926	18.8143	8264	MS201900090_4_PKA.raw	F4		46	50	43	0.0278641	0	5.113e-07	247624128	18.57
		FALSE	High	Mascot (A5)	Unambiguous	[K].TLEEEAKTHEAQIQEmR.[Q]	M16(Oxidation)	1	1	P35579	P35579	1	3	0.7647	0	1	1	686.997	2058.98	2058.98	0.31	0.00022	HCD (High Energy Collision Dissociation)	MS2	37.3601	25	19.9813	9388	MS201900090_4_PKA.raw	F4		17	50	43	19.2888	8.015e-05	0.0005256	2.38293e+06	19.5
		FALSE	High	Mascot (A5)	Selected	[K].TLEEEAKTHEAQIQEmR.[Q]	M16(Oxidation)	1	1	P35579	P35579	1	3	0	0	1	1	686.996	2058.97	2058.98	-1.17	-0.0008	HCD (High Energy Collision Dissociation)	MS2	42.6234	25	19.4685	8811	MS201900090_4_PKA.raw	F4		12	50	43	67.4453	8.015e-05	0.000397	2.38293e+06	19.5
		FALSE	High	Mascot (A5)	Unambiguous	[K].TLEEEAKTHEAQIQEmR.[Q]	M16(Oxidation)	1	1	P35579	P35579	1	3	0.8	0	1	1	686.997	2058.98	2058.98	0.44	0.0003	HCD (High Energy Collision Dissociation)	MS2	67.285	25	20.7683	10268	MS201900090_4_PKA.raw	F4		5	50	43	298.095	0.006761	0.1519	2.38293e+06	19.5
	FALSE	High	[K].TLEEEAKTHEAQIQEMR.[Q]			4.28078e-06	0	1	1	2	P35579	P35579 [1175-1191]	1	2042.98	0	100		High	High	0	2.082e-06	63	23.86	K.TLEEEAKTHEAQIQEMR.Q	[1175-1191]		Used
		Checked	Confidence	Identifying Node	PSM Ambiguity	Annotated Sequence	Modifications	# Protein Groups	# Proteins	Master Protein Accessions	Protein Accessions	# Missed Cleavages	Charge	DeltaScore	DeltaCn	Rank	Search Engine Rank	m/z [Da]	MH+ [Da]	Theo. MH+ [Da]	DeltaM [ppm]	Deltam/z [Da]	Activation Type	MS Order	Isolation Interference [%]	Ion Inject Time [ms]	RT [min]	First Scan	Spectrum File	File ID	Quan Info	Ions Score	Identity Strict	Identity Relaxed	Expectation Value	Percolator q-Value	Percolator PEP	Precursor Abundance	Apex RT [min]
		FALSE	High	Mascot (A5)	Unambiguous	[K].TLEEEAKTHEAQIQEMR.[Q]		1	1	P35579	P35579	1	3	0.9683	0	1	1	681.665	2042.98	2042.98	-0.25	-0.00017	HCD (High Energy Collision Dissociation)	MS2	3.90992	4.505	24.0665	13866	MS201900090_4_PKA.raw	F4		63	49	42	0.000538361	0	2.082e-06	192354912	23.86
		FALSE	High	Mascot (A5)	Unambiguous	[K].TLEEEAKTHEAQIQEMR.[Q]		1	1	P35579	P35579	1	3	1	0	1	1	681.666	2042.98	2042.98	1.56	0.00106	HCD (High Energy Collision Dissociation)	MS2	44.9932	25	23.6247	13428	MS201900090_4_PKA.raw	F4		60	49	42	0.000910379	0	1.507e-06	192354912	23.86
	FALSE	High	[R].TEMEDLMSSKDDVGK.[S]	1xAcetyl [N-Term]; 2xOxidation [M3; M7]	P35579 1xAcetyl [N-Term]	5.3784e-06	0	1	1	2	P35579	P35579 [1504-1518]	1	1758.74	0	100		High	High	0	1.986e-05	83	16.08	R.TEMEDLMSSKDDVGK.S	[1504-1518]	1xAcetyl [N-Term]	Used
		Checked	Confidence	Identifying Node	PSM Ambiguity	Annotated Sequence	Modifications	# Protein Groups	# Proteins	Master Protein Accessions	Protein Accessions	# Missed Cleavages	Charge	DeltaScore	DeltaCn	Rank	Search Engine Rank	m/z [Da]	MH+ [Da]	Theo. MH+ [Da]	DeltaM [ppm]	Deltam/z [Da]	Activation Type	MS Order	Isolation Interference [%]	Ion Inject Time [ms]	RT [min]	First Scan	Spectrum File	File ID	Quan Info	Ions Score	Identity Strict	Identity Relaxed	Expectation Value	Percolator q-Value	Percolator PEP	Precursor Abundance	Apex RT [min]
		FALSE	High	Mascot (A5)	Unambiguous	[R].tEmEDLmSSKDDVGK.[S]	N-Term(Acetyl); M3(Oxidation); M7(Oxidation)	1	1	P35579	P35579	1	2	1	0	1	1	879.874	1758.74	1758.74	0.36	0.00031	HCD (High Energy Collision Dissociation)	MS2	0	25	16.0767	5240	MS201900090_4_PKA.raw	F4		83	48	41	3.35248e-06	0	1.986e-05	6.38198e+06	16.08
		FALSE	High	Mascot (A5)	Unambiguous	[R].tEmEDLmSSKDDVGK.[S]	N-Term(Acetyl); M3(Oxidation); M7(Oxidation)	1	1	P35579	P35579	1	2	1	0	1	1	879.872	1758.74	1758.74	-2.34	-0.00206	HCD (High Energy Collision Dissociation)	MS2	12.9813	25	15.038	4043	MS201900090_4_PKA.raw	F4		66	48	41	0.000156343	0	1.939e-06	2.29249e+06	15.03
	FALSE	High	[RK].TQLEELEDELQATEDAKLR.[L]			2.29839e-08	0	3	3	2	P35580; P35749; P35579	P35580 [1546-1564]; P35749 [1546-1564]; P35579 [1539-1557]	1	2231.1	0		No Quan Values	High	High	0	5.286e-09	74		K.TQLEELEDELQATEDAKLR.L	[1539-1557]		Not Used
		Checked	Confidence	Identifying Node	PSM Ambiguity	Annotated Sequence	Modifications	# Protein Groups	# Proteins	Master Protein Accessions	Protein Accessions	# Missed Cleavages	Charge	DeltaScore	DeltaCn	Rank	Search Engine Rank	m/z [Da]	MH+ [Da]	Theo. MH+ [Da]	DeltaM [ppm]	Deltam/z [Da]	Activation Type	MS Order	Isolation Interference [%]	Ion Inject Time [ms]	RT [min]	First Scan	Spectrum File	File ID	Quan Info	Ions Score	Identity Strict	Identity Relaxed	Expectation Value	Percolator q-Value	Percolator PEP	Precursor Abundance	Apex RT [min]
		FALSE	High	Mascot (A5)	Unambiguous	[RK].TQLEELEDELQATEDAKLR.[L]		3	3	P35580; P35749; P35579	P35580; P35749; P35579	1	3	0.9492	0	1	1	744.374	2231.11	2231.1	1.4	0.00104	HCD (High Energy Collision Dissociation)	MS2	17.7181	25	47.7006	39228	MS201900090_4_PKA.raw	F4		59	49	42	0.00119189	0	1.369e-07	1.84615e+06	47.7
		FALSE	High	Mascot (A5)	Unambiguous	[RK].TQLEELEDELQATEDAKLR.[L]		3	3	P35580; P35749; P35579	P35580; P35749; P35579	1	3	0.8919	0	1	1	744.372	2231.1	2231.1	-1.04	-0.00077	HCD (High Energy Collision Dissociation)	MS2	0.763232	9.727	50.72	42594	MS201900090_4_PKA.raw	F4		74	49	42	3.65693e-05	0	5.286e-09
	FALSE	High	[RK].TQLEELEDELQATEDAK.[L]	1xAcetyl [N-Term]	P35580 1xAcetyl [N-Term]; P35749 1xAcetyl [N-Term]; P35579 1xAcetyl [N-Term]	5.27787e-10	0	3	3	4	P35580; P35749; P35579	P35580 [1546-1562]; P35749 [1546-1562]; P35579 [1539-1555]	0	2003.93	0	100	Shared	High	High	0	8.917e-11	84	61.88	K.TQLEELEDELQATEDAK.L	[1539-1555]	1xAcetyl [N-Term]	Used
		Checked	Confidence	Identifying Node	PSM Ambiguity	Annotated Sequence	Modifications	# Protein Groups	# Proteins	Master Protein Accessions	Protein Accessions	# Missed Cleavages	Charge	DeltaScore	DeltaCn	Rank	Search Engine Rank	m/z [Da]	MH+ [Da]	Theo. MH+ [Da]	DeltaM [ppm]	Deltam/z [Da]	Activation Type	MS Order	Isolation Interference [%]	Ion Inject Time [ms]	RT [min]	First Scan	Spectrum File	File ID	Quan Info	Ions Score	Identity Strict	Identity Relaxed	Expectation Value	Percolator q-Value	Percolator PEP	Precursor Abundance	Apex RT [min]
		FALSE	High	Mascot (A5)	Unambiguous	[RK].tQLEELEDELQATEDAK.[L]	N-Term(Acetyl)	3	3	P35580; P35749; P35579	P35580; P35749; P35579	0	2	0.8485	0	1	1	1002.46	2003.92	2003.93	-3.54	-0.00355	HCD (High Energy Collision Dissociation)	MS2	0	25	65.7446	59285	MS201900090_4_PKA.raw	F4		33	50	43	0.651741	0	1.591e-05	1.13524e+06	65.89
		FALSE	High	Mascot (A5)	Unambiguous	[RK].tQLEELEDELQATEDAK.[L]	N-Term(Acetyl)	3	3	P35580; P35749; P35579	P35580; P35749; P35579	0	2	0.961	0	1	1	1002.47	2003.92	2003.93	-2.22	-0.00223	HCD (High Energy Collision Dissociation)	MS2	0	25	61.722	54640	MS201900090_4_PKA.raw	F4		77	50	43	2.41251e-05	0	9.103e-09	8933180	61.88
		FALSE	High	Mascot (A5)	Unambiguous	[RK].tQLEELEDELQATEDAK.[L]	N-Term(Acetyl)	3	3	P35580; P35749; P35579	P35580; P35749; P35579	0	2	0.9881	0	1	1	1002.47	2003.93	2003.93	-1.19	-0.00119	HCD (High Energy Collision Dissociation)	MS2	0	25	62.1733	55133	MS201900090_4_PKA.raw	F4		84	50	43	4.08531e-06	0	8.917e-11	8933180	61.88
		FALSE	High	Mascot (A5)	Unambiguous	[RK].tQLEELEDELQATEDAK.[L]	N-Term(Acetyl)	3	3	P35580; P35749; P35579	P35580; P35749; P35579	0	2	0.8333	0	1	1	1002.47	2003.94	2003.93	5.56	0.00557	HCD (High Energy Collision Dissociation)	MS2		25	48.6405	40254	MS201900090_4_PKA.raw	F4		60	50	43	0.00108961	0	9.328e-08	4274816	48.71
	FALSE	High	[RK].TQLEELEDELQATEDAK.[L]			8.02045e-10	0	3	3	17	P35580; P35749; P35579	P35580 [1546-1562]; P35749 [1546-1562]; P35579 [1539-1555]	0	1961.92	0	100	Shared	High	High	0	1.078e-09	119	51.79	K.TQLEELEDELQATEDAK.L	[1539-1555]		Used
		Checked	Confidence	Identifying Node	PSM Ambiguity	Annotated Sequence	Modifications	# Protein Groups	# Proteins	Master Protein Accessions	Protein Accessions	# Missed Cleavages	Charge	DeltaScore	DeltaCn	Rank	Search Engine Rank	m/z [Da]	MH+ [Da]	Theo. MH+ [Da]	DeltaM [ppm]	Deltam/z [Da]	Activation Type	MS Order	Isolation Interference [%]	Ion Inject Time [ms]	RT [min]	First Scan	Spectrum File	File ID	Quan Info	Ions Score	Identity Strict	Identity Relaxed	Expectation Value	Percolator q-Value	Percolator PEP	Precursor Abundance	Apex RT [min]
		FALSE	High	Mascot (A5)	Unambiguous	[RK].TQLEELEDELQATEDAK.[L]		3	3	P35580; P35749; P35579	P35580; P35749; P35579	0	3	1	0	1	1	654.645	1961.92	1961.92	1.32	0.00086	HCD (High Energy Collision Dissociation)	MS2	0	25	51.5024	43454	MS201900090_4_PKA.raw	F4		60	50	43	0.00109269	0	2.138e-05	34290928	51.81
		FALSE	High	Mascot (A5)	Unambiguous	[RK].TQLEELEDELQATEDAK.[L]		3	3	P35580; P35749; P35579	P35580; P35749; P35579	0	2	1	0	1	1	981.465	1961.92	1961.92	1.76	0.00173	HCD (High Energy Collision Dissociation)	MS2	21.3059	25	49.3198	41031	MS201900090_4_PKA.raw	F4		72	50	43	8.03389e-05	0	7.694e-07	2938839	49.44
		FALSE	High	Mascot (A5)	Unambiguous	[RK].TQLEELEDELQATEDAK.[L]		3	3	P35580; P35749; P35579	P35580; P35749; P35579	0	2	1	0	1	1	981.465	1961.92	1961.92	1.91	0.00187	HCD (High Energy Collision Dissociation)	MS2	0	25	53.7403	45912	MS201900090_4_PKA.raw	F4		78	50	43	1.74387e-05	0	1.215e-08	597850944	51.79
		FALSE	High	Mascot (A5)	Unambiguous	[RK].TQLEELEDELQATEDAK.[L]		3	3	P35580; P35749; P35579	P35580; P35749; P35579	0	2	1	0	1	1	981.462	1961.92	1961.92	-0.5	-0.00049	HCD (High Energy Collision Dissociation)	MS2	25.8423	25	54.3895	46634	MS201900090_4_PKA.raw	F4		56	50	43	0.00309174	0	1.037e-07
		FALSE	High	Mascot (A5)	Unambiguous	[RK].TQLEELEDELQATEDAK.[L]		3	3	P35580; P35749; P35579	P35580; P35749; P35579	0	2	0.9831	0	1	1	981.464	1961.92	1961.92	1.12	0.0011	HCD (High Energy Collision Dissociation)	MS2	0	25	54.4814	46743	MS201900090_4_PKA.raw	F4		59	50	43	0.00140652	0	1.528e-06
		FALSE	High	Mascot (A5)	Unambiguous	[RK].TQLEELEDELQATEDAK.[L]		3	3	P35580; P35749; P35579	P35580; P35749; P35579	0	2	1	0	1	1	981.459	1961.91	1961.92	-4.45	-0.00437	HCD (High Energy Collision Dissociation)	MS2	0	25	53.2562	45365	MS201900090_4_PKA.raw	F4		108	50	43	1.87259e-08	0	1.402e-10	597850944	51.79
		FALSE	High	Mascot (A5)	Unambiguous	[RK].TQLEELEDELQATEDAK.[L]		3	3	P35580; P35749; P35579	P35580; P35749; P35579	0	2	1	0	1	1	981.461	1961.92	1961.92	-1.55	-0.00152	HCD (High Energy Collision Dissociation)	MS2	23.1938	25	55.3691	47704	MS201900090_4_PKA.raw	F4		62	50	43	0.000661209	0	1.012e-08	1.24324e+06	55.37
		FALSE	High	Mascot (A5)	Unambiguous	[RK].TQLEELEDELQATEDAK.[L]		3	3	P35580; P35749; P35579	P35580; P35749; P35579	0	2	1	0	1	1	981.462	1961.92	1961.92	-1.06	-0.00104	HCD (High Energy Collision Dissociation)	MS2	6.73589	13.876	52.3012	44305	MS201900090_4_PKA.raw	F4		114	50	43	5.00727e-09	0	4.181e-08	597850944	51.79
		FALSE	High	Mascot (A5)	Unambiguous	[RK].TQLEELEDELQATEDAK.[L]		3	3	P35580; P35749; P35579	P35580; P35749; P35579	0	2	1	0	1	1	981.462	1961.92	1961.92	-0.86	-0.00084	HCD (High Energy Collision Dissociation)	MS2	20.4017	25	52.7763	44830	MS201900090_4_PKA.raw	F4		109	50	43	1.46746e-08	0	8.331e-09	597850944	51.79
		FALSE	High	Mascot (A5)	Unambiguous	[RK].TQLEELEDELQATEDAK.[L]		3	3	P35580; P35749; P35579	P35580; P35749; P35579	0	2	0.9912	0	1	1	981.462	1961.92	1961.92	-0.65	-0.00063	HCD (High Energy Collision Dissociation)	MS2	0.185295	0.379	51.8546	43838	MS201900090_4_PKA.raw	F4		114	50	43	4.78048e-09	0	6.022e-08	597850944	51.79
		FALSE	High	Mascot (A5)	Unambiguous	[RK].TQLEELEDELQATEDAK.[L]		3	3	P35580; P35749; P35579	P35580; P35749; P35579	0	2	0.9916	0	1	1	981.458	1961.91	1961.92	-5.52	-0.00541	HCD (High Energy Collision Dissociation)	MS2	0	25	51.424	43365	MS201900090_4_PKA.raw	F4		119	50	43	1.5684e-09	0	1.078e-09	597850944	51.79
		FALSE	High	Mascot (A5)	Unambiguous	[RK].TQLEELEDELQATEDAK.[L]		3	3	P35580; P35749; P35579	P35580; P35749; P35579	0	2	1	0	1	1	981.45	1961.89	1961.92	-12.74	-0.0125	HCD (High Energy Collision Dissociation)	MS2	14.2195	25	55.861	48252	MS201900090_4_PKA.raw	F4		17	50	43	26.1278	0.0001341	0.002959
		FALSE	High	Mascot (A5)	Unambiguous	[RK].TQLEELEDELQATEDAK.[L]		3	3	P35580; P35749; P35579	P35580; P35749; P35579	0	2	1	0	1	1	981.456	1961.91	1961.92	-6.6	-0.00647	HCD (High Energy Collision Dissociation)	MS2	18.0396	25	56.9658	49270	MS201900090_4_PKA.raw	F4		9	50	43	159.553	0.0001341	0.001466	595758	56.95
		FALSE	High	Mascot (A5)	Unambiguous	[RK].TQLEELEDELQATEDAK.[L]		3	3	P35580; P35749; P35579	P35580; P35749; P35579	0	2	1	0	1	1	981.461	1961.91	1961.92	-2.22	-0.00217	HCD (High Energy Collision Dissociation)	MS2	0	25	58.0776	50475	MS201900090_4_PKA.raw	F4		29	50	43	1.44588	0.0001341	0.001853	446119	58.1
		FALSE	High	Mascot (A5)	Unambiguous	[RK].TQLEELEDELQATEDAK.[L]		3	3	P35580; P35749; P35579	P35580; P35749; P35579	0	2	0.8	0	1	1	981.466	1961.92	1961.92	2.91	0.00285	HCD (High Energy Collision Dissociation)	MS2		25	57.5936	49944	MS201900090_4_PKA.raw	F4		15	50	43	37.7712	0.0001341	0.0008063
		FALSE	High	Mascot (A5)	Unambiguous	[RK].TQLEELEDELQATEDAK.[L]		3	3	P35580; P35749; P35579	P35580; P35749; P35579	0	2	1	0	1	1	981.461	1961.91	1961.92	-2.47	-0.00242	HCD (High Energy Collision Dissociation)	MS2	0	25	58.0899	50488	MS201900090_4_PKA.raw	F4		10	50	43	108.421	0.0002495	0.005194	446119	58.1
		FALSE	High	Mascot (A5)	Unambiguous	[RK].TQLEELEDELQATEDAK.[L]		3	3	P35580; P35749; P35579	P35580; P35749; P35579	0	2	1	0	1	1	981.455	1961.9	1961.92	-8.23	-0.00807	HCD (High Energy Collision Dissociation)	MS2	47.8361	25	58.7761	51275	MS201900090_4_PKA.raw	F4		9	50	43	146.337	0.0003658	0.006366	446119	58.1
	FALSE	High	[R].TEMEDLMSSKDDVGK.[S]	1xAcetyl [N-Term]; 1xOxidation [M7]	P35579 1xAcetyl [N-Term]	3.42353e-07	0	1	1	4	P35579	P35579 [1504-1518]	1	1742.75	0	100		High	High	0	5.474e-07	83	16.2	R.TEMEDLMSSKDDVGK.S	[1504-1518]	1xAcetyl [N-Term]	Used
		Checked	Confidence	Identifying Node	PSM Ambiguity	Annotated Sequence	Modifications	# Protein Groups	# Proteins	Master Protein Accessions	Protein Accessions	# Missed Cleavages	Charge	DeltaScore	DeltaCn	Rank	Search Engine Rank	m/z [Da]	MH+ [Da]	Theo. MH+ [Da]	DeltaM [ppm]	Deltam/z [Da]	Activation Type	MS Order	Isolation Interference [%]	Ion Inject Time [ms]	RT [min]	First Scan	Spectrum File	File ID	Quan Info	Ions Score	Identity Strict	Identity Relaxed	Expectation Value	Percolator q-Value	Percolator PEP	Precursor Abundance	Apex RT [min]
		FALSE	High	Mascot (A5)	Unambiguous	[R].tEMEDLmSSKDDVGK.[S]	N-Term(Acetyl); M7(Oxidation)	1	1	P35579	P35579	1	2	0.7368	0	1	1	871.877	1742.75	1742.75	0.53	0.00047	HCD (High Energy Collision Dissociation)	MS2	11.7614	25	22.0694	11731	MS201900090_4_PKA.raw	F4		76	48	41	1.85431e-05	0	9.796e-08	1.5063e+06	22.11
		FALSE	High	Mascot (A5)	Unambiguous	[R].tEMEDLmSSKDDVGK.[S]	N-Term(Acetyl); M7(Oxidation)	1	1	P35579	P35579	1	2	0.6988	0	1	1	871.874	1742.74	1742.75	-2.97	-0.00259	HCD (High Energy Collision Dissociation)	MS2	0	25	22.1227	11798	MS201900090_4_PKA.raw	F4		83	48	41	3.40189e-06	0	5.474e-07	1.5063e+06	22.11
		FALSE	High	Mascot (A5)	Unambiguous	[R].tEMEDLmSSKDDVGK.[S]	N-Term(Acetyl); M7(Oxidation)	1	1	P35579	P35579	1	2	0.8333	0	1	1	871.877	1742.75	1742.75	0.81	0.00071	HCD (High Energy Collision Dissociation)	MS2	0	25	16.201	5381	MS201900090_4_PKA.raw	F4		72	48	41	5.02252e-05	8.015e-05	9.273e-05	10721735	16.2
		FALSE	High	Mascot (A5)	Unambiguous	[R].tEMEDLmSSKDDVGK.[S]	N-Term(Acetyl); M7(Oxidation)	1	1	P35579	P35579	1	2	1	0	1	1	871.878	1742.75	1742.75	1.79	0.00156	HCD (High Energy Collision Dissociation)	MS2	42.3176	25	17.2468	6511	MS201900090_4_PKA.raw	F4		3	48	41	397.722	0.0001341	0.00106
	FALSE	High	[K].YLYVDKNFINNPLAQADWAAK.[K]			1.38438e-07	0	1	1	4	P35579	P35579 [9-29]	1	2454.25	0	100		High	High	0	3.686e-08	85	53.85	K.YLYVDKNFINNPLAQADWAAK.K	[9-29]		Used
		Checked	Confidence	Identifying Node	PSM Ambiguity	Annotated Sequence	Modifications	# Protein Groups	# Proteins	Master Protein Accessions	Protein Accessions	# Missed Cleavages	Charge	DeltaScore	DeltaCn	Rank	Search Engine Rank	m/z [Da]	MH+ [Da]	Theo. MH+ [Da]	DeltaM [ppm]	Deltam/z [Da]	Activation Type	MS Order	Isolation Interference [%]	Ion Inject Time [ms]	RT [min]	First Scan	Spectrum File	File ID	Quan Info	Ions Score	Identity Strict	Identity Relaxed	Expectation Value	Percolator q-Value	Percolator PEP	Precursor Abundance	Apex RT [min]
		FALSE	High	Mascot (A5)	Unambiguous	[K].YLYVDKNFINNPLAQADWAAK.[K]		1	1	P35579	P35579	1	3	0.9412	0	1	1	818.752	2454.24	2454.25	-1.28	-0.00105	HCD (High Energy Collision Dissociation)	MS2	0	25	54.6352	46908	MS201900090_4_PKA.raw	F4		51	49	42	0.00721845	0	1.095e-05	1.95292e+06	54.58
		FALSE	High	Mascot (A5)	Unambiguous	[K].YLYVDKNFINNPLAQADWAAK.[K]		1	1	P35579	P35579	1	3	0.8333	0	1	1	818.753	2454.25	2454.25	0.28	0.00023	HCD (High Energy Collision Dissociation)	MS2	3.31973	15.175	54.1483	46383	MS201900090_4_PKA.raw	F4		78	49	42	1.16811e-05	0	6.001e-08	48840644	53.85
		FALSE	High	Mascot (A5)	Unambiguous	[K].YLYVDKNFINNPLAQADWAAK.[K]		1	1	P35579	P35579	1	3	0.9744	0	1	1	818.754	2454.25	2454.25	0.6	0.00049	HCD (High Energy Collision Dissociation)	MS2	16.5545	25	55.6192	47970	MS201900090_4_PKA.raw	F4		39	49	42	0.11094	0	4.657e-06	1.49585e+06	55.93
		FALSE	High	Mascot (A5)	Unambiguous	[K].YLYVDKNFINNPLAQADWAAK.[K]		1	1	P35579	P35579	1	3	0.8706	0	1	1	818.754	2454.25	2454.25	0.86	0.00071	HCD (High Energy Collision Dissociation)	MS2	15.716	24.171	53.6865	45860	MS201900090_4_PKA.raw	F4		85	49	42	2.33636e-06	0	3.686e-08	48840644	53.85
	FALSE	High	[R].VISGVLQLGNIVFKK.[E]			4.65447e-06	0	1	1	3	P35579	P35579 [342-356]	1	1614.99	0	100		High	High	0	1.647e-06	18	49.15	R.VISGVLQLGNIVFKK.E	[342-356]		Used
		Checked	Confidence	Identifying Node	PSM Ambiguity	Annotated Sequence	Modifications	# Protein Groups	# Proteins	Master Protein Accessions	Protein Accessions	# Missed Cleavages	Charge	DeltaScore	DeltaCn	Rank	Search Engine Rank	m/z [Da]	MH+ [Da]	Theo. MH+ [Da]	DeltaM [ppm]	Deltam/z [Da]	Activation Type	MS Order	Isolation Interference [%]	Ion Inject Time [ms]	RT [min]	First Scan	Spectrum File	File ID	Quan Info	Ions Score	Identity Strict	Identity Relaxed	Expectation Value	Percolator q-Value	Percolator PEP	Precursor Abundance	Apex RT [min]
		FALSE	High	Mascot (A5)	Unambiguous	[R].VISGVLQLGNIVFKK.[E]		1	1	P35579	P35579	1	2	1	0	1	1	807.999	1614.99	1614.99	-1.61	-0.0013	HCD (High Energy Collision Dissociation)	MS2	70.9623	22.05	49.514	41258	MS201900090_4_PKA.raw	F4		18	33	26	0.30062	0	1.647e-06	34509796	49.15
		FALSE	High	Mascot (A5)	Unambiguous	[R].VISGVLQLGNIVFKK.[E]		1	1	P35579	P35579	1	2		0	1	1	808.003	1615	1614.99	2.89	0.00234	HCD (High Energy Collision Dissociation)	MS2	94.1257	2.534	49.004	40674	MS201900090_4_PKA.raw	F4		0	32	25	15.481	0.001443	0.02737	34509796	49.15
		FALSE	High	Mascot (A5)	Unambiguous	[R].VISGVLQLGNIVFKK.[E]		1	1	P35579	P35579	1	3	1	0	1	1	539.003	1615	1614.99	1.1	0.00059	HCD (High Energy Collision Dissociation)	MS2	51.1578	25	50.1874	41994	MS201900090_4_PKA.raw	F4		8	32	25	2.9192	0.009218	0.199
	FALSE	High	[R].VISGVLQLGNIVFK.[K]	1xAcetyl [N-Term]	P35579 1xAcetyl [N-Term]	2.57117e-06	0	1	1	1	P35579	P35579 [342-355]	0	1528.91	0	100		High	High	0	8.701e-07	78	72.98	R.VISGVLQLGNIVFK.K	[342-355]	1xAcetyl [N-Term]	Used
		Checked	Confidence	Identifying Node	PSM Ambiguity	Annotated Sequence	Modifications	# Protein Groups	# Proteins	Master Protein Accessions	Protein Accessions	# Missed Cleavages	Charge	DeltaScore	DeltaCn	Rank	Search Engine Rank	m/z [Da]	MH+ [Da]	Theo. MH+ [Da]	DeltaM [ppm]	Deltam/z [Da]	Activation Type	MS Order	Isolation Interference [%]	Ion Inject Time [ms]	RT [min]	First Scan	Spectrum File	File ID	Quan Info	Ions Score	Identity Strict	Identity Relaxed	Expectation Value	Percolator q-Value	Percolator PEP	Precursor Abundance	Apex RT [min]
		FALSE	High	Mascot (A5)	Unambiguous	[R].vISGVLQLGNIVFK.[K]	N-Term(Acetyl)	1	1	P35579	P35579	0	2	0.8077	0	1	1	764.958	1528.91	1528.91	-0.14	-0.00011	HCD (High Energy Collision Dissociation)	MS2	21.6817	17.989	72.9908	67644	MS201900090_4_PKA.raw	F4		78	38	31	1.10593e-06	0	8.701e-07	2.63067e+06	72.98
	FALSE	High	[R].VISGVLQLGNIVFK.[K]			1.97952e-07	0	1	1	18	P35579	P35579 [342-355]	0	1486.9	0	100		High	High	0	5.454e-08	82	61.86	R.VISGVLQLGNIVFK.K	[342-355]		Used
		Checked	Confidence	Identifying Node	PSM Ambiguity	Annotated Sequence	Modifications	# Protein Groups	# Proteins	Master Protein Accessions	Protein Accessions	# Missed Cleavages	Charge	DeltaScore	DeltaCn	Rank	Search Engine Rank	m/z [Da]	MH+ [Da]	Theo. MH+ [Da]	DeltaM [ppm]	Deltam/z [Da]	Activation Type	MS Order	Isolation Interference [%]	Ion Inject Time [ms]	RT [min]	First Scan	Spectrum File	File ID	Quan Info	Ions Score	Identity Strict	Identity Relaxed	Expectation Value	Percolator q-Value	Percolator PEP	Precursor Abundance	Apex RT [min]
		FALSE	High	Mascot (A5)	Unambiguous	[R].VISGVLQLGNIVFK.[K]		1	1	P35579	P35579	0	2	0.9211	0	1	1	743.954	1486.9	1486.9	1.33	0.00099	HCD (High Energy Collision Dissociation)	MS2	0.539971	6.399	62.4323	55428	MS201900090_4_PKA.raw	F4		76	36	29	9.83679e-07	0	1.629e-06	565927424	61.86
		FALSE	High	Mascot (A5)	Unambiguous	[R].VISGVLQLGNIVFK.[K]		1	1	P35579	P35579	0	2	0.8642	0	1	1	743.954	1486.9	1486.9	1.22	0.00091	HCD (High Energy Collision Dissociation)	MS2	0	0.717	61.9588	54896	MS201900090_4_PKA.raw	F4		81	36	29	3.58839e-07	0	1.944e-06	565927424	61.86
		FALSE	High	Mascot (A5)	Unambiguous	[R].VISGVLQLGNIVFK.[K]		1	1	P35579	P35579	0	2	0.8475	0	1	1	743.954	1486.9	1486.9	0.69	0.00051	HCD (High Energy Collision Dissociation)	MS2	7.05603	25	62.9291	56007	MS201900090_4_PKA.raw	F4		59	36	29	4.95918e-05	0	2.096e-06	565927424	61.86
		FALSE	High	Mascot (A5)	Unambiguous	[R].VISGVLQLGNIVFK.[K]		1	1	P35579	P35579	0	2	0.9474	0	1	1	743.954	1486.9	1486.9	0.5	0.00037	HCD (High Energy Collision Dissociation)	MS2	7.45193	25	64.4277	57773	MS201900090_4_PKA.raw	F4		57	36	29	8.9621e-05	0	1.292e-06	565927424	61.86
		FALSE	High	Mascot (A5)	Unambiguous	[R].VISGVLQLGNIVFK.[K]		1	1	P35579	P35579	0	2	0.9146	0	1	1	743.954	1486.9	1486.9	0.63	0.00047	HCD (High Energy Collision Dissociation)	MS2	21.9206	25	61.519	54401	MS201900090_4_PKA.raw	F4		82	36	29	2.46269e-07	0	5.454e-08	565927424	61.86
		FALSE	High	Mascot (A5)	Unambiguous	[R].VISGVLQLGNIVFK.[K]		1	1	P35579	P35579	0	2	0.8846	0	1	1	743.954	1486.9	1486.9	0.49	0.00037	HCD (High Energy Collision Dissociation)	MS2	19.2902	25	65.3639	58837	MS201900090_4_PKA.raw	F4		52	36	29	0.000249705	0	8.628e-07	1174877	65.33
		FALSE	High	Mascot (A5)	Unambiguous	[R].VISGVLQLGNIVFK.[K]		1	1	P35579	P35579	0	2	1	0	1	1	743.953	1486.9	1486.9	0.04	3e-05	HCD (High Energy Collision Dissociation)	MS2	11.71	25	64.8786	58276	MS201900090_4_PKA.raw	F4		54	36	29	0.000187606	0	6.293e-07	565927424	61.86
		FALSE	High	Mascot (A5)	Unambiguous	[R].VISGVLQLGNIVFK.[K]		1	1	P35579	P35579	0	2	1	0	1	1	743.953	1486.9	1486.9	-0.26	-0.00019	HCD (High Energy Collision Dissociation)	MS2	9.8436	25	63.9306	57189	MS201900090_4_PKA.raw	F4		43	36	29	0.00209048	0	3.481e-06	565927424	61.86
		FALSE	High	Mascot (A5)	Unambiguous	[R].VISGVLQLGNIVFK.[K]		1	1	P35579	P35579	0	2	0.9167	0	1	1	743.953	1486.9	1486.9	-0.44	-0.00033	HCD (High Energy Collision Dissociation)	MS2	1.92948	25	63.4298	56598	MS201900090_4_PKA.raw	F4		60	36	29	4.78902e-05	0	3.237e-06	565927424	61.86
		FALSE	High	Mascot (A5)	Unambiguous	[R].VISGVLQLGNIVFK.[K]		1	1	P35579	P35579	0	2	1	0	1	1	743.954	1486.9	1486.9	0.95	0.00071	HCD (High Energy Collision Dissociation)	MS2	21.8238	25	69.2772	63402	MS201900090_4_PKA.raw	F4		28	36	29	0.0638116	8.015e-05	0.000296
		FALSE	High	Mascot (A5)	Unambiguous	[R].VISGVLQLGNIVFK.[K]		1	1	P35579	P35579	0	2	1	0	1	1	743.953	1486.9	1486.9	-0.13	-0.0001	HCD (High Energy Collision Dissociation)	MS2	54.8749	25	71.3345	65776	MS201900090_4_PKA.raw	F4		32	36	29	0.0314229	8.015e-05	0.0005435	593432	72.06
		FALSE	High	Mascot (A5)	Unambiguous	[R].VISGVLQLGNIVFK.[K]		1	1	P35579	P35579	0	2	1	0	1	1	743.953	1486.9	1486.9	-0.01	-1e-05	HCD (High Energy Collision Dissociation)	MS2	51.4981	25	71.8298	66310	MS201900090_4_PKA.raw	F4		35	36	29	0.0143961	0.0001341	0.00079	593432	72.06
		FALSE	High	Mascot (A5)	Unambiguous	[R].VISGVLQLGNIVFK.[K]		1	1	P35579	P35579	0	2	1	0	1	1	743.954	1486.9	1486.9	1.06	0.00079	HCD (High Energy Collision Dissociation)	MS2	39.8473	25	69.7644	63950	MS201900090_4_PKA.raw	F4		23	36	29	0.205542	0.0001341	0.001195
		FALSE	High	Mascot (A5)	Unambiguous	[R].VISGVLQLGNIVFK.[K]		1	1	P35579	P35579	0	2	1	0	1	1	743.95	1486.89	1486.9	-3.9	-0.0029	HCD (High Energy Collision Dissociation)	MS2	26.6559	25	70.2952	64570	MS201900090_4_PKA.raw	F4		18	37	30	0.938412	0.0001341	0.002006
		FALSE	High	Mascot (A5)	Unambiguous	[R].VISGVLQLGNIVFK.[K]		1	1	P35579	P35579	0	2	1	0	1	1	743.957	1486.91	1486.9	5.01	0.00373	HCD (High Energy Collision Dissociation)	MS2	17.3965	25	60.5818	53333	MS201900090_4_PKA.raw	F4		11	35	28	2.83452	0.0002495	0.00441
		FALSE	High	Mascot (A5)	Unambiguous	[R].VISGVLQLGNIVFK.[K]		1	1	P35579	P35579	0	2	1	0	1	1	743.953	1486.9	1486.9	0.36	0.00027	HCD (High Energy Collision Dissociation)	MS2	61.3787	25	73.9493	68749	MS201900090_4_PKA.raw	F4		17	36	29	0.8137	0.0004105	0.007077
		FALSE	High	Mascot (A5)	Unambiguous	[R].VISGVLQLGNIVFK.[K]		1	1	P35579	P35579	0	2	1	0	1	1	743.951	1486.9	1486.9	-2.42	-0.0018	HCD (High Energy Collision Dissociation)	MS2	0	25	74.4719	69345	MS201900090_4_PKA.raw	F4		14	37	30	1.94961	0.0007363	0.01169
		FALSE	High	Mascot (A5)	Unambiguous	[R].VISGVLQLGNIVFK.[K]		1	1	P35579	P35579	0	2	1	0	1	1	743.952	1486.9	1486.9	-1.6	-0.00119	HCD (High Energy Collision Dissociation)	MS2	42.727	25	74.5229	69397	MS201900090_4_PKA.raw	F4		8	36	29	7.88014	0.0037	0.09205
	FALSE	High	[K].VIQYLAYVASSHK.[S]	1xAcetyl [N-Term]	P35579 1xAcetyl [N-Term]	3.00815e-07	0	1	1	2	P35579	P35579 [187-199]	0	1520.81	0	100		High	High	0	1.078e-07	73	53.93	K.VIQYLAYVASSHK.S	[187-199]	1xAcetyl [N-Term]	Used
		Checked	Confidence	Identifying Node	PSM Ambiguity	Annotated Sequence	Modifications	# Protein Groups	# Proteins	Master Protein Accessions	Protein Accessions	# Missed Cleavages	Charge	DeltaScore	DeltaCn	Rank	Search Engine Rank	m/z [Da]	MH+ [Da]	Theo. MH+ [Da]	DeltaM [ppm]	Deltam/z [Da]	Activation Type	MS Order	Isolation Interference [%]	Ion Inject Time [ms]	RT [min]	First Scan	Spectrum File	File ID	Quan Info	Ions Score	Identity Strict	Identity Relaxed	Expectation Value	Percolator q-Value	Percolator PEP	Precursor Abundance	Apex RT [min]
		FALSE	High	Mascot (A5)	Unambiguous	[K].vIQYLAYVASSHK.[S]	N-Term(Acetyl)	1	1	P35579	P35579	0	2	0.931	0	1	1	760.91	1520.81	1520.81	0.82	0.00062	HCD (High Energy Collision Dissociation)	MS2	12.4202	25	51.5822	43537	MS201900090_4_PKA.raw	F4		58	45	38	0.000568818	0	8.565e-08
		FALSE	High	Mascot (A5)	Unambiguous	[K].vIQYLAYVASSHK.[S]	N-Term(Acetyl)	1	1	P35579	P35579	0	2	0.9452	0	1	1	760.91	1520.81	1520.81	0.74	0.00056	HCD (High Energy Collision Dissociation)	MS2	52.2919	25	53.8199	46010	MS201900090_4_PKA.raw	F4		73	45	38	2.02051e-05	0	1.078e-07	2.31853e+06	53.93
	FALSE	High	[K].VIQYLAYVASSHK.[S]			1.2048e-05	0	1	1	9	P35579	P35579 [187-199]	0	1478.8	0	100		High	High	0	4.619e-06	73	31.24	K.VIQYLAYVASSHK.S	[187-199]		Used
		Checked	Confidence	Identifying Node	PSM Ambiguity	Annotated Sequence	Modifications	# Protein Groups	# Proteins	Master Protein Accessions	Protein Accessions	# Missed Cleavages	Charge	DeltaScore	DeltaCn	Rank	Search Engine Rank	m/z [Da]	MH+ [Da]	Theo. MH+ [Da]	DeltaM [ppm]	Deltam/z [Da]	Activation Type	MS Order	Isolation Interference [%]	Ion Inject Time [ms]	RT [min]	First Scan	Spectrum File	File ID	Quan Info	Ions Score	Identity Strict	Identity Relaxed	Expectation Value	Percolator q-Value	Percolator PEP	Precursor Abundance	Apex RT [min]
		FALSE	High	Mascot (A5)	Unambiguous	[K].VIQYLAYVASSHK.[S]		1	1	P35579	P35579	0	2	0.8356	0	1	1	739.907	1478.81	1478.8	4.53	0.00335	HCD (High Energy Collision Dissociation)	MS2	56.36	25	31.0466	21207	MS201900090_4_PKA.raw	F4		73	44	37	1.5242e-05	0	8.885e-06	200997184	31.24
		FALSE	High	Mascot (A5)	Unambiguous	[K].VIQYLAYVASSHK.[S]		1	1	P35579	P35579	0	3	1	0	1	1	493.606	1478.8	1478.8	2.18	0.00108	HCD (High Energy Collision Dissociation)	MS2	71.4751	25	30.305	20437	MS201900090_4_PKA.raw	F4		58	44	37	0.000462223	0	1.801e-05	1.69455e+06	30.3
		FALSE	High	Mascot (A5)	Unambiguous	[K].VIQYLAYVASSHK.[S]		1	1	P35579	P35579	0	2	0.9041	0	1	1	739.904	1478.8	1478.8	0.68	0.00051	HCD (High Energy Collision Dissociation)	MS2	0.670608	5.911	31.5267	21723	MS201900090_4_PKA.raw	F4		73	45	38	1.57786e-05	0	4.619e-06	200997184	31.24
		FALSE	High	Mascot (A5)	Unambiguous	[K].VIQYLAYVASSHK.[S]		1	1	P35579	P35579	0	3	1	0	1	1	493.605	1478.8	1478.8	0.04	2e-05	HCD (High Energy Collision Dissociation)	MS2	62.4965	25	32.8598	22953	MS201900090_4_PKA.raw	F4		42	45	38	0.0227763	0	8.615e-06	1877585	32.36
		FALSE	High	Mascot (A5)	Unambiguous	[K].VIQYLAYVASSHK.[S]		1	1	P35579	P35579	0	2	1	0	1	1	739.902	1478.8	1478.8	-1.94	-0.00143	HCD (High Energy Collision Dissociation)	MS2	0	25	34.41	24438	MS201900090_4_PKA.raw	F4		46	45	38	0.00875036	0	6.708e-06	693625	34.47
		FALSE	High	Mascot (A5)	Unambiguous	[K].VIQYLAYVASSHK.[S]		1	1	P35579	P35579	0	3	1	0	1	1	493.605	1478.8	1478.8	-0.07	-4e-05	HCD (High Energy Collision Dissociation)	MS2	40.4005	20.412	31.7666	21971	MS201900090_4_PKA.raw	F4		20	45	38	3.09144	8.015e-05	9.103e-05	5622716	31.8
		FALSE	High	Mascot (A5)	Unambiguous	[K].VIQYLAYVASSHK.[S]		1	1	P35579	P35579	0	3	0.9091	0	1	1	493.604	1478.8	1478.8	-0.89	-0.00044	HCD (High Energy Collision Dissociation)	MS2	48.9834	25	37.4715	27861	MS201900090_4_PKA.raw	F4		11	45	38	30.0594	0.0004105	0.008486
		FALSE	High	Mascot (A5)	Unambiguous	[K].VIQYLAYVASSHK.[S]		1	1	P35579	P35579	0	3	1	0	1	1	493.604	1478.8	1478.8	-2.39	-0.00118	HCD (High Energy Collision Dissociation)	MS2	44.305	25	32.3638	22414	MS201900090_4_PKA.raw	F4		17	45	38	7.03719	0.0007363	0.01105	1877585	32.36
		FALSE	High	Mascot (A5)	Unambiguous	[K].VIQYLAYVASSHK.[S]		1	1	P35579	P35579	0	3	0.8	0	1	1	493.606	1478.8	1478.8	1.92	0.00095	HCD (High Energy Collision Dissociation)	MS2	15.8426	25	35.2546	25404	MS201900090_4_PKA.raw	F4		10	45	38	32.057	0.001195	0.02521	973853	34.97
	FALSE	High	[K].VSHLLGINVTDFTR.[G]	1xAcetyl [N-Term]	P35579 1xAcetyl [N-Term]	4.54563e-09	0	1	1	2	P35579	P35579 [374-387]	0	1613.86	0	100		High	High	0	9.166e-10	84	55.27	K.VSHLLGINVTDFTR.G	[374-387]	1xAcetyl [N-Term]	Used
		Checked	Confidence	Identifying Node	PSM Ambiguity	Annotated Sequence	Modifications	# Protein Groups	# Proteins	Master Protein Accessions	Protein Accessions	# Missed Cleavages	Charge	DeltaScore	DeltaCn	Rank	Search Engine Rank	m/z [Da]	MH+ [Da]	Theo. MH+ [Da]	DeltaM [ppm]	Deltam/z [Da]	Activation Type	MS Order	Isolation Interference [%]	Ion Inject Time [ms]	RT [min]	First Scan	Spectrum File	File ID	Quan Info	Ions Score	Identity Strict	Identity Relaxed	Expectation Value	Percolator q-Value	Percolator PEP	Precursor Abundance	Apex RT [min]
		FALSE	High	Mascot (A5)	Unambiguous	[K].vSHLLGINVTDFTR.[G]	N-Term(Acetyl)	1	1	P35579	P35579	0	2	0.8929	0	1	1	807.437	1613.87	1613.86	0.98	0.00079	HCD (High Energy Collision Dissociation)	MS2	7.27103	25	55.6582	48017	MS201900090_4_PKA.raw	F4		84	45	38	1.49207e-06	0	9.166e-10	4.93831e+06	55.27
		FALSE	High	Mascot (A5)	Unambiguous	[K].vSHLLGINVTDFTR.[G]	N-Term(Acetyl)	1	1	P35579	P35579	0	2	0.9455	0	1	1	807.434	1613.86	1613.86	-2.04	-0.00165	HCD (High Energy Collision Dissociation)	MS2	0	25	55.1645	47504	MS201900090_4_PKA.raw	F4		55	46	39	0.00145092	0	1.588e-08	4.93831e+06	55.27
	FALSE	High	[K].VSHLLGINVTDFTR.[G]			7.86812e-06	0	1	1	11	P35579	P35579 [374-387]	0	1571.85	0	100		High	High	0	8.924e-06	76	40.44	K.VSHLLGINVTDFTR.G	[374-387]		Used
		Checked	Confidence	Identifying Node	PSM Ambiguity	Annotated Sequence	Modifications	# Protein Groups	# Proteins	Master Protein Accessions	Protein Accessions	# Missed Cleavages	Charge	DeltaScore	DeltaCn	Rank	Search Engine Rank	m/z [Da]	MH+ [Da]	Theo. MH+ [Da]	DeltaM [ppm]	Deltam/z [Da]	Activation Type	MS Order	Isolation Interference [%]	Ion Inject Time [ms]	RT [min]	First Scan	Spectrum File	File ID	Quan Info	Ions Score	Identity Strict	Identity Relaxed	Expectation Value	Percolator q-Value	Percolator PEP	Precursor Abundance	Apex RT [min]
		FALSE	High	Mascot (A5)	Unambiguous	[K].VSHLLGINVTDFTR.[G]		1	1	P35579	P35579	0	3	0.9589	0	1	1	524.623	1571.85	1571.85	0.14	7e-05	HCD (High Energy Collision Dissociation)	MS2	1.58883	25	40.9328	31823	MS201900090_4_PKA.raw	F4		73	45	38	1.81713e-05	0	2.921e-06	173696640	40.44
		FALSE	High	Mascot (A5)	Unambiguous	[K].VSHLLGINVTDFTR.[G]		1	1	P35579	P35579	0	3	0.9605	0	1	1	524.622	1571.85	1571.85	-0.74	-0.00039	HCD (High Energy Collision Dissociation)	MS2	0	1.482	40.4547	31277	MS201900090_4_PKA.raw	F4		76	45	38	8.51748e-06	0	8.924e-06	173696640	40.44
		FALSE	High	Mascot (A5)	Unambiguous	[K].VSHLLGINVTDFTR.[G]		1	1	P35579	P35579	0	3	1	0	1	1	524.621	1571.85	1571.85	-2.71	-0.00142	HCD (High Energy Collision Dissociation)	MS2	38.4858	25	41.3673	32336	MS201900090_4_PKA.raw	F4		50	45	38	0.00356537	8.015e-05	3.753e-05	173696640	40.44
		FALSE	High	Mascot (A5)	Unambiguous	[K].VSHLLGINVTDFTR.[G]		1	1	P35579	P35579	0	2	1	0	1	1	786.43	1571.85	1571.85	-1.35	-0.00106	HCD (High Energy Collision Dissociation)	MS2	47.5585	25	42.8416	33967	MS201900090_4_PKA.raw	F4		24	45	38	1.60384	8.015e-05	0.0007264
		FALSE	High	Mascot (A5)	Unambiguous	[K].VSHLLGINVTDFTR.[G]		1	1	P35579	P35579	0	2	0.7143	0	1	1	786.431	1571.85	1571.85	0.05	4e-05	HCD (High Energy Collision Dissociation)	MS2	19.0134	25	41.8415	32869	MS201900090_4_PKA.raw	F4		28	45	38	0.597567	8.015e-05	0.0004104	134289520	40.45
		FALSE	High	Mascot (A5)	Unambiguous	[K].VSHLLGINVTDFTR.[G]		1	1	P35579	P35579	0	2	1	0	1	1	786.429	1571.85	1571.85	-2.24	-0.00176	HCD (High Energy Collision Dissociation)	MS2	57.2398	23.678	41.4741	32449	MS201900090_4_PKA.raw	F4		29	45	38	0.494383	0.0001341	0.001773	134289520	40.45
		FALSE	High	Mascot (A5)	Unambiguous	[K].VSHLLGINVTDFTR.[G]		1	1	P35579	P35579	0	3	1	0	1	1	524.621	1571.85	1571.85	-3.01	-0.00158	HCD (High Energy Collision Dissociation)	MS2	37.5459	25	40.0213	30802	MS201900090_4_PKA.raw	F4		40	45	38	0.0411553	0.0001341	0.001819	173696640	40.44
		FALSE	High	Mascot (A5)	Unambiguous	[K].VSHLLGINVTDFTR.[G]		1	1	P35579	P35579	0	2	0.75	0	1	1	786.431	1571.86	1571.85	1.02	0.0008	HCD (High Energy Collision Dissociation)	MS2	44.9044	25	42.3311	33386	MS201900090_4_PKA.raw	F4		40	45	38	0.0394929	0.0001341	0.001163	895304	42.22
		FALSE	High	Mascot (A5)	Unambiguous	[K].VSHLLGINVTDFTR.[G]		1	1	P35579	P35579	0	3	1	0	1	1	524.622	1571.85	1571.85	-0.9	-0.00047	HCD (High Energy Collision Dissociation)	MS2	41.9505	25	43.858	35137	MS201900090_4_PKA.raw	F4		16	45	38	10.2181	0.0002495	0.005237
		FALSE	High	Mascot (A5)	Unambiguous	[K].VSHLLGINVTDFTR.[G]		1	1	P35579	P35579	0	3	1	0	1	1	524.619	1571.84	1571.85	-7.9	-0.00414	HCD (High Energy Collision Dissociation)	MS2	51.6313	25	44.3431	35668	MS201900090_4_PKA.raw	F4		25	46	39	1.20774	0.0004105	0.008097
		FALSE	High	Mascot (A5)	Unambiguous	[K].VSHLLGINVTDFTR.[G]		1	1	P35579	P35579	0	2	1	0	1	1	786.428	1571.85	1571.85	-3.33	-0.00262	HCD (High Energy Collision Dissociation)	MS2	42.3368	25	35.1241	25257	MS201900090_4_PKA.raw	F4		6	45	38	103.261	0.0007892	0.0158
	FALSE	High	[K].NFINNPLAQADWAAK.[K]			1.30263e-07	0	1	1	28	P35579	P35579 [15-29]	0	1672.84	0	100		High	High	0	1.122e-05	103	47.89	K.NFINNPLAQADWAAK.K	[15-29]		Used
		Checked	Confidence	Identifying Node	PSM Ambiguity	Annotated Sequence	Modifications	# Protein Groups	# Proteins	Master Protein Accessions	Protein Accessions	# Missed Cleavages	Charge	DeltaScore	DeltaCn	Rank	Search Engine Rank	m/z [Da]	MH+ [Da]	Theo. MH+ [Da]	DeltaM [ppm]	Deltam/z [Da]	Activation Type	MS Order	Isolation Interference [%]	Ion Inject Time [ms]	RT [min]	First Scan	Spectrum File	File ID	Quan Info	Ions Score	Identity Strict	Identity Relaxed	Expectation Value	Percolator q-Value	Percolator PEP	Precursor Abundance	Apex RT [min]
		FALSE	High	Mascot (A5)	Unambiguous	[K].NFINNPLAQADWAAK.[K]		1	1	P35579	P35579	0	2	0.92	0	1	1	836.933	1672.86	1672.84	9.27	0.00775	HCD (High Energy Collision Dissociation)	MS2	66.9267	25	51.727	43699	MS201900090_4_PKA.raw	F4		100	47	40	5.53676e-08	0	3.141e-06
		FALSE	High	Mascot (A5)	Unambiguous	[K].NFINNPLAQADWAAK.[K]		1	1	P35579	P35579	0	2	0.9184	0	1	1	836.928	1672.85	1672.84	2.2	0.00184	HCD (High Energy Collision Dissociation)	MS2	0	25	57.2812	49625	MS201900090_4_PKA.raw	F4		49	47	40	0.00808966	0	8.655e-06
		FALSE	High	Mascot (A5)	Unambiguous	[K].NFINNPLAQADWAAK.[K]		1	1	P35579	P35579	0	2	0.9857	0	1	1	836.928	1672.85	1672.84	2.17	0.00182	HCD (High Energy Collision Dissociation)	MS2	68.3804	25	53.1665	45273	MS201900090_4_PKA.raw	F4		71	47	40	5.54715e-05	0	9.479e-07	1.07182e+06	52.49
		FALSE	High	Mascot (A5)	Unambiguous	[K].NFINNPLAQADWAAK.[K]		1	1	P35579	P35579	0	2	0.9753	0	1	1	836.927	1672.85	1672.84	2.06	0.00173	HCD (High Energy Collision Dissociation)	MS2	0	25	52.2448	44242	MS201900090_4_PKA.raw	F4		81	47	40	5.17482e-06	0	3.468e-08	1.07182e+06	52.49
		FALSE	High	Mascot (A5)	Unambiguous	[K].NFINNPLAQADWAAK.[K]		1	1	P35579	P35579	0	2	0.9109	0	1	1	836.926	1672.85	1672.84	0.86	0.00072	HCD (High Energy Collision Dissociation)	MS2	0.338745	0.838	47.7673	39296	MS201900090_4_PKA.raw	F4		101	48	41	5.32511e-08	0	1.946e-05	822064448	47.89
		FALSE	High	Mascot (A5)	Unambiguous	[K].NFINNPLAQADWAAK.[K]		1	1	P35579	P35579	0	2	0.881	0	1	1	836.926	1672.85	1672.84	0.84	0.0007	HCD (High Energy Collision Dissociation)	MS2	0	25	49.7653	41536	MS201900090_4_PKA.raw	F4		84	48	41	2.53705e-06	0	7.806e-07	822064448	47.89
		FALSE	High	Mascot (A5)	Unambiguous	[K].NFINNPLAQADWAAK.[K]		1	1	P35579	P35579	0	2	1	0	1	1	836.926	1672.84	1672.84	0.32	0.00027	HCD (High Energy Collision Dissociation)	MS2	0	25	44.7736	36128	MS201900090_4_PKA.raw	F4		61	48	41	0.000549704	0	6e-07	666223	44.7
		FALSE	High	Mascot (A5)	Unambiguous	[K].NFINNPLAQADWAAK.[K]		1	1	P35579	P35579	0	2	0.8421	0	1	1	836.926	1672.84	1672.84	0.02	1e-05	HCD (High Energy Collision Dissociation)	MS2	15.7319	25	54.4257	46678	MS201900090_4_PKA.raw	F4		57	48	41	0.00137129	0	3.151e-06	937096	54.43
		FALSE	High	Mascot (A5)	Unambiguous	[K].NFINNPLAQADWAAK.[K]		1	1	P35579	P35579	0	2	0.8529	0	1	1	836.925	1672.84	1672.84	-0.48	-0.0004	HCD (High Energy Collision Dissociation)	MS2	40.678	25	52.5852	44611	MS201900090_4_PKA.raw	F4		34	48	41	0.25426	0	9.187e-07	1.07182e+06	52.49
		FALSE	High	Mascot (A5)	Unambiguous	[K].NFINNPLAQADWAAK.[K]		1	1	P35579	P35579	0	2	0.9029	0	1	1	836.925	1672.84	1672.84	-1.14	-0.00095	HCD (High Energy Collision Dissociation)	MS2	98.8752	25	61.5764	54472	MS201900090_4_PKA.raw	F4		103	48	41	3.07376e-08	0	1.122e-05	382291	61.56
		FALSE	High	Mascot (A5)	Unambiguous	[K].NFINNPLAQADWAAK.[K]		1	1	P35579	P35579	0	2	0.8974	0	1	1	836.925	1672.84	1672.84	-1.41	-0.00118	HCD (High Energy Collision Dissociation)	MS2	18.8434	21.038	48.7367	40359	MS201900090_4_PKA.raw	F4		78	48	41	1.12644e-05	0	4.153e-06	822064448	47.89
		FALSE	High	Mascot (A5)	Unambiguous	[K].NFINNPLAQADWAAK.[K]		1	1	P35579	P35579	0	2	0.9853	0	1	1	836.924	1672.84	1672.84	-1.57	-0.00131	HCD (High Energy Collision Dissociation)	MS2	18.7361	25	49.7389	41504	MS201900090_4_PKA.raw	F4		68	48	41	0.000109737	0	2.071e-07	822064448	47.89
		FALSE	High	Mascot (A5)	Unambiguous	[K].NFINNPLAQADWAAK.[K]		1	1	P35579	P35579	0	2	0.92	0	1	1	836.924	1672.84	1672.84	-2.34	-0.00195	HCD (High Energy Collision Dissociation)	MS2	0	25	50.3534	42183	MS201900090_4_PKA.raw	F4		100	48	41	6.08153e-08	0	2.076e-07
		FALSE	High	Mascot (A5)	Unambiguous	[K].NFINNPLAQADWAAK.[K]		1	1	P35579	P35579	0	2	0.9012	0	1	1	836.924	1672.84	1672.84	-2.55	-0.00213	HCD (High Energy Collision Dissociation)	MS2	41.8025	25	49.2257	40918	MS201900090_4_PKA.raw	F4		81	48	41	5.03824e-06	0	2.715e-06	822064448	47.89
		FALSE	High	Mascot (A5)	Unambiguous	[K].NFINNPLAQADWAAK.[K]		1	1	P35579	P35579	0	2	0.9753	0	1	1	836.923	1672.84	1672.84	-2.98	-0.00249	HCD (High Energy Collision Dissociation)	MS2	0	25	52.0938	44081	MS201900090_4_PKA.raw	F4		81	48	41	5.26614e-06	0	4.483e-07	1.07182e+06	52.49
		FALSE	High	Mascot (A5)	Unambiguous	[K].NFINNPLAQADWAAK.[K]		1	1	P35579	P35579	0	2	0.8462	0	1	1	836.923	1672.84	1672.84	-3.15	-0.00264	HCD (High Energy Collision Dissociation)	MS2	0	25	51.4081	43347	MS201900090_4_PKA.raw	F4		65	48	41	0.000193661	0	9.687e-07
		FALSE	High	Mascot (A5)	Unambiguous	[K].NFINNPLAQADWAAK.[K]		1	1	P35579	P35579	0	2	0.8364	0	1	1	836.923	1672.84	1672.84	-3.7	-0.0031	HCD (High Energy Collision Dissociation)	MS2	13.3979	25	54.6816	46965	MS201900090_4_PKA.raw	F4		55	48	41	0.00215956	0	5.039e-06	937096	54.43
		FALSE	High	Mascot (A5)	Unambiguous	[K].NFINNPLAQADWAAK.[K]		1	1	P35579	P35579	0	2	0.8676	0	1	1	836.919	1672.83	1672.84	-8.39	-0.00702	HCD (High Energy Collision Dissociation)	MS2	21.5224	25	53.6485	45813	MS201900090_4_PKA.raw	F4		68	48	41	9.83163e-05	0	4.492e-07	1.07182e+06	52.49
		FALSE	High	Mascot (A5)	Unambiguous	[K].NFINNPLAQADWAAK.[K]		1	1	P35579	P35579	0	2	0.8667	0	1	1	836.918	1672.83	1672.84	-9.52	-0.00796	HCD (High Energy Collision Dissociation)	MS2	0	25	47.4528	38966	MS201900090_4_PKA.raw	F4		30	48	41	0.665947	0	2.413e-05	822064448	47.89
		FALSE	High	Mascot (A5)	Unambiguous	[K].NFINNPLAQADWAAK.[K]		1	1	P35579	P35579	0	2	0.92	0	1	1	836.924	1672.84	1672.84	-2.55	-0.00213	HCD (High Energy Collision Dissociation)	MS2	7.8223	25	49.1827	40879	MS201900090_4_PKA.raw	F4		100	48	41	6.89095e-08	0	3.985e-06	822064448	47.89
		FALSE	High	Mascot (A5)	Unambiguous	[K].NFINNPLAQADWAAK.[K]		1	1	P35579	P35579	0	2	1	0	1	1	836.92	1672.83	1672.84	-7.2	-0.00602	HCD (High Energy Collision Dissociation)	MS2	92.5988	25	62.6902	55723	MS201900090_4_PKA.raw	F4		31	48	41	0.521012	8.015e-05	0.000187	253398	63.36
		FALSE	High	Mascot (A5)	Unambiguous	[K].NFINNPLAQADWAAK.[K]		1	1	P35579	P35579	0	2	1	0	1	1	836.925	1672.84	1672.84	-0.57	-0.00047	HCD (High Energy Collision Dissociation)	MS2	22.4318	3.89	48.2693	39830	MS201900090_4_PKA.raw	F4		50	48	41	0.00592862	8.015e-05	6.358e-05	822064448	47.89
		FALSE	High	Mascot (A5)	Unambiguous	[K].NFINNPLAQADWAAK.[K]		1	1	P35579	P35579	0	2	0.8919	0	1	1	836.926	1672.85	1672.84	0.68	0.00057	HCD (High Energy Collision Dissociation)	MS2	33.5739	25	58.741	51234	MS201900090_4_PKA.raw	F4		37	48	41	0.121295	8.015e-05	0.0002071
		FALSE	High	Mascot (A5)	Unambiguous	[K].NFINNPLAQADWAAK.[K]		1	1	P35579	P35579	0	2	1	0	1	1	836.927	1672.85	1672.84	0.95	0.0008	HCD (High Energy Collision Dissociation)	MS2	46.6183	25	63.4427	56612	MS201900090_4_PKA.raw	F4		23	48	41	3.36223	8.015e-05	0.0003864	253398	63.36
		FALSE	High	Mascot (A5)	Unambiguous	[K].NFINNPLAQADWAAK.[K]		1	1	P35579	P35579	0	2	0.9	0	1	1	836.928	1672.85	1672.84	2.48	0.00207	HCD (High Energy Collision Dissociation)	MS2	27.7188	25	57.6824	50049	MS201900090_4_PKA.raw	F4		10	47	40	57.4406	8.015e-05	0.0002172
		FALSE	High	Mascot (A5)	Unambiguous	[K].NFINNPLAQADWAAK.[K]		1	1	P35579	P35579	0	2	1	0	1	1	836.929	1672.85	1672.84	3.46	0.00289	HCD (High Energy Collision Dissociation)	MS2		25	63.2525	56387	MS201900090_4_PKA.raw	F4		33	47	40	0.285777	8.015e-05	0.0002909	253398	63.36
		FALSE	High	Mascot (A5)	Unambiguous	[K].NFINNPLAQADWAAK.[K]		1	1	P35579	P35579	0	2	0.9259	0	1	1	836.924	1672.84	1672.84	-2.11	-0.00176	HCD (High Energy Collision Dissociation)	MS2	58.4098	25	60.5579	53305	MS201900090_4_PKA.raw	F4		27	48	41	1.17543	0.0001341	0.001757
		FALSE	High	Mascot (A5)	Unambiguous	[K].NFINNPLAQADWAAK.[K]		1	1	P35579	P35579	0	2	1	0	1	1	836.929	1672.85	1672.84	4.01	0.00335	HCD (High Energy Collision Dissociation)	MS2	47.4308	25	63.4955	56677	MS201900090_4_PKA.raw	F4		16	47	40	15.4528	0.0004105	0.008617	253398	63.36
	FALSE	High	[R].TEMEDLMSSKDDVGK.[S]	1xAcetyl [N-Term]	P35579 1xAcetyl [N-Term]	1.05268e-07	0	1	1	3	P35579	P35579 [1504-1518]	1	1726.75	0	100		High	High	0	2.744e-08	71	21.25	R.TEMEDLMSSKDDVGK.S	[1504-1518]	1xAcetyl [N-Term]	Used
		Checked	Confidence	Identifying Node	PSM Ambiguity	Annotated Sequence	Modifications	# Protein Groups	# Proteins	Master Protein Accessions	Protein Accessions	# Missed Cleavages	Charge	DeltaScore	DeltaCn	Rank	Search Engine Rank	m/z [Da]	MH+ [Da]	Theo. MH+ [Da]	DeltaM [ppm]	Deltam/z [Da]	Activation Type	MS Order	Isolation Interference [%]	Ion Inject Time [ms]	RT [min]	First Scan	Spectrum File	File ID	Quan Info	Ions Score	Identity Strict	Identity Relaxed	Expectation Value	Percolator q-Value	Percolator PEP	Precursor Abundance	Apex RT [min]
		FALSE	High	Mascot (A5)	Unambiguous	[R].tEMEDLMSSKDDVGK.[S]	N-Term(Acetyl)	1	1	P35579	P35579	1	2	1	0	1	1	863.879	1726.75	1726.75	-0.36	-0.00031	HCD (High Energy Collision Dissociation)	MS2	0	25	31.4205	21610	MS201900090_4_PKA.raw	F4		71	48	41	5.67111e-05	0	2.744e-08	2.023e+06	31.43
		FALSE	High	Mascot (A5)	Unambiguous	[R].tEMEDLMSSKDDVGK.[S]	N-Term(Acetyl)	1	1	P35579	P35579	1	2	1	0	1	1	863.874	1726.74	1726.75	-5.78	-0.00499	HCD (High Energy Collision Dissociation)	MS2	42.5987	25	21.7283	11339	MS201900090_4_PKA.raw	F4		38	48	41	0.101846	8.015e-05	0.0002167	508819	21.69
		FALSE	High	Mascot (A5)	Unambiguous	[R].tEMEDLMSSKDDVGK.[S]	N-Term(Acetyl)	1	1	P35579	P35579	1	2	0.2	0	1	1	863.881	1726.75	1726.75	2.25	0.00194	HCD (High Energy Collision Dissociation)	MS2	90.3841	15.638	21.1199	10657	MS201900090_4_PKA.raw	F4		5	48	41	224.379	0.001195	0.02494	2.0841e+06	21.25
	FALSE	High	[R].TEMEDLMSSKDDVGK.[S]	1xOxidation [M]		2.3828e-06	0	1	1	7	P35579	P35579 [1504-1518]	1	1700.74	0	100		High	High	0	8.3e-06	97	17.17	R.TEMEDLMSSKDDVGK.S	[1504-1518]		Used
		Checked	Confidence	Identifying Node	PSM Ambiguity	Annotated Sequence	Modifications	# Protein Groups	# Proteins	Master Protein Accessions	Protein Accessions	# Missed Cleavages	Charge	DeltaScore	DeltaCn	Rank	Search Engine Rank	m/z [Da]	MH+ [Da]	Theo. MH+ [Da]	DeltaM [ppm]	Deltam/z [Da]	Activation Type	MS Order	Isolation Interference [%]	Ion Inject Time [ms]	RT [min]	First Scan	Spectrum File	File ID	Quan Info	Ions Score	Identity Strict	Identity Relaxed	Expectation Value	Percolator q-Value	Percolator PEP	Precursor Abundance	Apex RT [min]
		FALSE	High	Mascot (A5)	Unambiguous	[R].TEMEDLmSSKDDVGK.[S]	M7(Oxidation)	1	1	P35579	P35579	1	2	0.5773	0	1	1	850.872	1700.74	1700.74	0.56	0.00047	HCD (High Energy Collision Dissociation)	MS2	0	11.183	17.3149	6594	MS201900090_4_PKA.raw	F4		97	48	41	1.34385e-07	0	8.3e-06	135829552	17.17
		FALSE	High	Mascot (A5)	Unambiguous	[R].TEmEDLMSSKDDVGK.[S]	M3(Oxidation)	1	1	P35579	P35579	1	2	0.6915	0	1	1	850.871	1700.74	1700.74	0.04	3e-05	HCD (High Energy Collision Dissociation)	MS2	0	5.994	16.8588	6136	MS201900090_4_PKA.raw	F4		94	48	41	2.53158e-07	0	2.621e-05	66016920	16.9
		FALSE	High	Mascot (A5)	Unambiguous	[R].TEmEDLMSSKDDVGK.[S]	M3(Oxidation)	1	1	P35579	P35579	1	2	0.0676	0	1	1	850.872	1700.74	1700.74	1.12	0.00096	HCD (High Energy Collision Dissociation)	MS2	0	25	18.8944	8345	MS201900090_4_PKA.raw	F4		74	48	41	2.78898e-05	0	8.008e-07
		FALSE	High	Mascot (A5)	Unambiguous	[R].TEMEDLmSSKDDVGK.[S]	M7(Oxidation)	1	1	P35579	P35579	1	2	0.1746	0	1	1	850.868	1700.73	1700.74	-4.1	-0.00349	HCD (High Energy Collision Dissociation)	MS2	0	25	17.7739	7083	MS201900090_4_PKA.raw	F4		63	48	41	0.000332426	8.015e-05	3.469e-05	135829552	17.17
		FALSE	High	Mascot (A5)	Unambiguous	[R].TEmEDLMSSKDDVGK.[S]	M3(Oxidation)	1	1	P35579	P35579	1	2	0.1714	0	1	1	850.871	1700.73	1700.74	-0.48	-0.00041	HCD (High Energy Collision Dissociation)	MS2	38.9524	25	20.6966	10180	MS201900090_4_PKA.raw	F4		35	48	41	0.194899	8.015e-05	0.0002296
		FALSE	High	Mascot (A5)	Unambiguous	[R].TEmEDLMSSKDDVGK.[S]	M3(Oxidation)	1	1	P35579	P35579	1	2	0.5441	0	1	1	850.873	1700.74	1700.74	1.73	0.00147	HCD (High Energy Collision Dissociation)	MS2	0	25	16.3991	5614	MS201900090_4_PKA.raw	F4		68	48	41	0.000101349	8.015e-05	3.637e-05	66016920	16.9
		FALSE	High	Mascot (A5)	Unambiguous	[R].TEMEDLmSSKDDVGK.[S]	M7(Oxidation)	1	1	P35579	P35579	1	2	0.3636	0	1	1	850.856	1700.7	1700.74	-18.38	-0.01563	HCD (High Energy Collision Dissociation)	MS2	0	25	17.8441	7153	MS201900090_4_PKA.raw	F4		33	47	40	0.320965	0.002022	0.04951
	FALSE	High	[R].QLEEAEEEAQR.[A]	1xAcetyl [N-Term]	P35579 1xAcetyl [N-Term]	3.31426e-05	0	1	1	2	P35579	P35579 [1878-1888]	0	1373.62	0	100		High	High	8.015e-05	7.473e-05	31	22.47	R.QLEEAEEEAQR.A	[1878-1888]	1xAcetyl [N-Term]	Used
		Checked	Confidence	Identifying Node	PSM Ambiguity	Annotated Sequence	Modifications	# Protein Groups	# Proteins	Master Protein Accessions	Protein Accessions	# Missed Cleavages	Charge	DeltaScore	DeltaCn	Rank	Search Engine Rank	m/z [Da]	MH+ [Da]	Theo. MH+ [Da]	DeltaM [ppm]	Deltam/z [Da]	Activation Type	MS Order	Isolation Interference [%]	Ion Inject Time [ms]	RT [min]	First Scan	Spectrum File	File ID	Quan Info	Ions Score	Identity Strict	Identity Relaxed	Expectation Value	Percolator q-Value	Percolator PEP	Precursor Abundance	Apex RT [min]
		FALSE	High	Mascot (A5)	Unambiguous	[R].qLEEAEEEAQR.[A]	N-Term(Acetyl)	1	1	P35579	P35579	0	2	0.8889	0	1	1	687.312	1373.62	1373.62	-0.86	-0.00059	HCD (High Energy Collision Dissociation)	MS2	66.6594	25	23.0207	12805	MS201900090_4_PKA.raw	F4		18	46	39	6.99914	0	1.382e-05	1.1464e+06	23.03
		FALSE	High	Mascot (A5)	Unambiguous	[R].qLEEAEEEAQR.[A]	N-Term(Acetyl)	1	1	P35579	P35579	0	2	0.9677	0	1	1	687.312	1373.62	1373.62	-0.29	-0.0002	HCD (High Energy Collision Dissociation)	MS2	62.6659	20.61	22.4288	12136	MS201900090_4_PKA.raw	F4		31	46	39	0.393715	8.015e-05	7.473e-05	2829233	22.47
	FALSE	High	[K].QIATLHAQVADMK.[K]	1xOxidation [M12]		1.61646e-06	0	1	1	6	P35579	P35579 [1358-1370]	0	1441.75	0	100		High	High	0	5.284e-07	61	15.87	K.QIATLHAQVADMK.K	[1358-1370]		Used
		Checked	Confidence	Identifying Node	PSM Ambiguity	Annotated Sequence	Modifications	# Protein Groups	# Proteins	Master Protein Accessions	Protein Accessions	# Missed Cleavages	Charge	DeltaScore	DeltaCn	Rank	Search Engine Rank	m/z [Da]	MH+ [Da]	Theo. MH+ [Da]	DeltaM [ppm]	Deltam/z [Da]	Activation Type	MS Order	Isolation Interference [%]	Ion Inject Time [ms]	RT [min]	First Scan	Spectrum File	File ID	Quan Info	Ions Score	Identity Strict	Identity Relaxed	Expectation Value	Percolator q-Value	Percolator PEP	Precursor Abundance	Apex RT [min]
		FALSE	High	Mascot (A5)	Unambiguous	[K].QIATLHAQVADmK.[K]	M12(Oxidation)	1	1	P35579	P35579	0	2	1	0	1	1	721.377	1441.75	1441.75	0.42	0.0003	HCD (High Energy Collision Dissociation)	MS2	11.8095	25	15.7903	4910	MS201900090_4_PKA.raw	F4		61	46	39	0.000311429	0	5.284e-07	312010208	15.87
		FALSE	High	Mascot (A5)	Unambiguous	[K].QIATLHAQVADmK.[K]	M12(Oxidation)	1	1	P35579	P35579	0	2	1	0	1	1	721.376	1441.75	1441.75	-1.06	-0.00076	HCD (High Energy Collision Dissociation)	MS2	24.112	23.746	16.2906	5492	MS201900090_4_PKA.raw	F4		53	46	39	0.0018964	0	5.161e-06	312010208	15.87
		FALSE	High	Mascot (A5)	Unambiguous	[K].QIATLHAQVADmK.[K]	M12(Oxidation)	1	1	P35579	P35579	0	2	1	0	1	1	721.375	1441.74	1441.75	-2.71	-0.00196	HCD (High Energy Collision Dissociation)	MS2	0	25	16.7551	6023	MS201900090_4_PKA.raw	F4		44	46	39	0.0167692	0	1.033e-05	12481369	17.01
		FALSE	High	Mascot (A5)	Unambiguous	[K].QIATLHAQVADmK.[K]	M12(Oxidation)	1	1	P35579	P35579	0	2	0.9722	0	1	1	721.376	1441.74	1441.75	-1.33	-0.00096	HCD (High Energy Collision Dissociation)	MS2	24.5756	25	18.21	7574	MS201900090_4_PKA.raw	F4		36	46	39	0.107255	8.015e-05	3.746e-05	1284299	18.08
		FALSE	High	Mascot (A5)	Unambiguous	[K].QIATLHAQVADmK.[K]	M12(Oxidation)	1	1	P35579	P35579	0	2	1	0	1	1	721.377	1441.75	1441.75	-0.56	-0.00041	HCD (High Energy Collision Dissociation)	MS2	51.0781	25	17.6535	6953	MS201900090_4_PKA.raw	F4		42	46	39	0.0241233	8.015e-05	0.0002822	2.02988e+06	17.45
		FALSE	High	Mascot (A5)	Unambiguous	[K].QIATLHAQVADmK.[K]	M12(Oxidation)	1	1	P35579	P35579	0	3	1	0	1	1	481.256	1441.75	1441.75	3.82	0.00183	HCD (High Energy Collision Dissociation)	MS2	33.172	25	17.218	6476	MS201900090_4_PKA.raw	F4		3	45	38	209.535	0.0004105	0.008694	4.14144e+06	17.29
	FALSE	High	[K].QIATLHAQVADMK.[K]			4.22788e-05	0	1	1	7	P35579	P35579 [1358-1370]	0	1425.75	0	100		High	High	0	1.877e-05	53	19.38	K.QIATLHAQVADMK.K	[1358-1370]		Used
		Checked	Confidence	Identifying Node	PSM Ambiguity	Annotated Sequence	Modifications	# Protein Groups	# Proteins	Master Protein Accessions	Protein Accessions	# Missed Cleavages	Charge	DeltaScore	DeltaCn	Rank	Search Engine Rank	m/z [Da]	MH+ [Da]	Theo. MH+ [Da]	DeltaM [ppm]	Deltam/z [Da]	Activation Type	MS Order	Isolation Interference [%]	Ion Inject Time [ms]	RT [min]	First Scan	Spectrum File	File ID	Quan Info	Ions Score	Identity Strict	Identity Relaxed	Expectation Value	Percolator q-Value	Percolator PEP	Precursor Abundance	Apex RT [min]
		FALSE	High	Mascot (A5)	Unambiguous	[K].QIATLHAQVADMK.[K]		1	1	P35579	P35579	0	2	1	0	1	1	713.381	1425.76	1425.75	2.71	0.00193	HCD (High Energy Collision Dissociation)	MS2	0	25	20.1416	9570	MS201900090_4_PKA.raw	F4		53	45	38	0.00147213	0	1.877e-05	149370592	19.38
		FALSE	High	Mascot (A5)	Unambiguous	[K].QIATLHAQVADMK.[K]		1	1	P35579	P35579	0	2	0.9429	0	1	1	713.379	1425.75	1425.75	-0.24	-0.00017	HCD (High Energy Collision Dissociation)	MS2	43.5418	12.557	19.2089	8624	MS201900090_4_PKA.raw	F4		35	45	38	0.104054	0	1.797e-05	149370592	19.38
		FALSE	High	Mascot (A5)	Unambiguous	[K].QIATLHAQVADMK.[K]		1	1	P35579	P35579	0	2	1	0	1	1	713.379	1425.75	1425.75	-0.92	-0.00066	HCD (High Energy Collision Dissociation)	MS2	0	25	20.62	10101	MS201900090_4_PKA.raw	F4		43	45	38	0.0176157	0	2.046e-05	149370592	19.38
		FALSE	High	Mascot (A5)	Unambiguous	[K].QIATLHAQVADMK.[K]		1	1	P35579	P35579	0	2	1	0	1	1	713.383	1425.76	1425.75	4.95	0.00353	HCD (High Energy Collision Dissociation)	MS2	34.2097	25	21.1206	10658	MS201900090_4_PKA.raw	F4		27	45	38	0.698686	0.0001341	0.00158	149370592	19.38
		FALSE	High	Mascot (A5)	Unambiguous	[K].QIATLHAQVADMK.[K]		1	1	P35579	P35579	0	2	1	0	1	1	713.381	1425.75	1425.75	1.36	0.00097	HCD (High Energy Collision Dissociation)	MS2	0	25	22.3998	12104	MS201900090_4_PKA.raw	F4		21	45	38	2.5363	0.0002495	0.0045
		FALSE	High	Mascot (A5)	Unambiguous	[K].QIATLHAQVADMK.[K]		1	1	P35579	P35579	0	2	1	0	1	1	713.38	1425.75	1425.75	-0.05	-3e-05	HCD (High Energy Collision Dissociation)	MS2	44.9739	25	21.6695	11269	MS201900090_4_PKA.raw	F4		12	45	38	21.69	0.0007363	0.01125	149370592	19.38
		FALSE	High	Mascot (A5)	Unambiguous	[K].QIATLHAQVADMK.[K]		1	1	P35579	P35579	0	3	1	0	1	1	475.922	1425.75	1425.75	-0.23	-0.00011	HCD (High Energy Collision Dissociation)	MS2	10.8268	11.645	19.6782	9026	MS201900090_4_PKA.raw	F4		22	45	38	2.08574	0.001054	0.01732	123614392	19.38
	FALSE	High	[KR].QLLQANPILEAFGNAK.[T]	1xAcetyl [N-Term]	P35749 1xAcetyl [N-Term]; P35579 1xAcetyl [N-Term]; Q7Z406 1xAcetyl [N-Term]	1.09043e-08	0	3	3	4	P35749; P35579; Q7Z406	P35749 [217-232]; P35579 [210-225]; Q7Z406 [237-252]	0	1768.96	0	100	Shared	High	High	0	2.36e-09	76	71.9	R.QLLQANPILEAFGNAK.T	[210-225]	1xAcetyl [N-Term]	Used
		Checked	Confidence	Identifying Node	PSM Ambiguity	Annotated Sequence	Modifications	# Protein Groups	# Proteins	Master Protein Accessions	Protein Accessions	# Missed Cleavages	Charge	DeltaScore	DeltaCn	Rank	Search Engine Rank	m/z [Da]	MH+ [Da]	Theo. MH+ [Da]	DeltaM [ppm]	Deltam/z [Da]	Activation Type	MS Order	Isolation Interference [%]	Ion Inject Time [ms]	RT [min]	First Scan	Spectrum File	File ID	Quan Info	Ions Score	Identity Strict	Identity Relaxed	Expectation Value	Percolator q-Value	Percolator PEP	Precursor Abundance	Apex RT [min]
		FALSE	High	Mascot (A5)	Unambiguous	[KR].qLLQANPILEAFGNAK.[T]	N-Term(Acetyl)	3	3	P35749; P35579; Q7Z406	P35749; P35579; Q7Z406	0	2	1	0	1	1	884.985	1768.96	1768.96	1.8	0.00159	HCD (High Energy Collision Dissociation)	MS2	4.35102	25	73.0771	67739	MS201900090_4_PKA.raw	F4		70	44	37	3.02689e-05	0	2.706e-06
		FALSE	High	Mascot (A5)	Unambiguous	[KR].qLLQANPILEAFGNAK.[T]	N-Term(Acetyl)	3	3	P35749; P35579; Q7Z406	P35749; P35579; Q7Z406	0	2	1	0	1	1	884.983	1768.96	1768.96	0.16	0.00014	HCD (High Energy Collision Dissociation)	MS2	66.5579	21.687	70.4366	64732	MS201900090_4_PKA.raw	F4		53	45	38	0.00160031	0	5.412e-07	1.90078e+06	70.47
		FALSE	High	Mascot (A5)	Unambiguous	[KR].qLLQANPILEAFGNAK.[T]	N-Term(Acetyl)	3	3	P35749; P35579; Q7Z406	P35749; P35579; Q7Z406	0	2	0.9474	0	1	1	884.98	1768.95	1768.96	-3.26	-0.00288	HCD (High Energy Collision Dissociation)	MS2	16.1741	25	71.7784	66251	MS201900090_4_PKA.raw	F4		76	45	38	8.6326e-06	0	2.36e-09	2700903	71.9
		FALSE	High	Mascot (A5)	Unambiguous	[KR].qLLQANPILEAFGNAK.[T]	N-Term(Acetyl)	3	3	P35749; P35579; Q7Z406	P35749; P35579; Q7Z406	0	2	1	0	1	1	884.983	1768.96	1768.96	-0.41	-0.00036	HCD (High Energy Collision Dissociation)	MS2	41.3398	25	60.5626	53311	MS201900090_4_PKA.raw	F4		44	45	38	0.0122945	8.015e-05	0.0003686
	FALSE	High	[KR].QLLQANPILEAFGNAK.[T]			5.26745e-08	0	3	3	21	P35749; P35579; Q7Z406	P35749 [217-232]; P35579 [210-225]; Q7Z406 [237-252]	0	1726.95	0	100	Shared	High	High	0	9.987e-08	102	57.81	R.QLLQANPILEAFGNAK.T	[210-225]		Used
		Checked	Confidence	Identifying Node	PSM Ambiguity	Annotated Sequence	Modifications	# Protein Groups	# Proteins	Master Protein Accessions	Protein Accessions	# Missed Cleavages	Charge	DeltaScore	DeltaCn	Rank	Search Engine Rank	m/z [Da]	MH+ [Da]	Theo. MH+ [Da]	DeltaM [ppm]	Deltam/z [Da]	Activation Type	MS Order	Isolation Interference [%]	Ion Inject Time [ms]	RT [min]	First Scan	Spectrum File	File ID	Quan Info	Ions Score	Identity Strict	Identity Relaxed	Expectation Value	Percolator q-Value	Percolator PEP	Precursor Abundance	Apex RT [min]
		FALSE	High	Mascot (A5)	Unambiguous	[KR].QLLQANPILEAFGNAK.[T]		3	3	P35749; P35579; Q7Z406	P35749; P35579; Q7Z406	0	2	0.8864	0	1	1	863.98	1726.95	1726.95	1.79	0.00155	HCD (High Energy Collision Dissociation)	MS2	0.0692534	0.276	57.8338	50217	MS201900090_4_PKA.raw	F4		88	44	37	4.90674e-07	0	3.804e-06	968511488	57.81
		FALSE	High	Mascot (A5)	Unambiguous	[KR].QLLQANPILEAFGNAK.[T]		3	3	P35749; P35579; Q7Z406	P35749; P35579; Q7Z406	0	2	0.907	0	1	1	863.979	1726.95	1726.95	1.52	0.00132	HCD (High Energy Collision Dissociation)	MS2	77.673	25	57.4086	49764	MS201900090_4_PKA.raw	F4		86	44	37	6.40985e-07	0	1.303e-08	968511488	57.81
		FALSE	High	Mascot (A5)	Unambiguous	[KR].QLLQANPILEAFGNAK.[T]		3	3	P35749; P35579; Q7Z406	P35749; P35579; Q7Z406	0	2	1	0	1	1	863.979	1726.95	1726.95	1.37	0.00119	HCD (High Energy Collision Dissociation)	MS2	55.235	25	66.194	59809	MS201900090_4_PKA.raw	F4		43	44	37	0.0141154	0	5.461e-06
		FALSE	High	Mascot (A5)	Unambiguous	[KR].QLLQANPILEAFGNAK.[T]		3	3	P35749; P35579; Q7Z406	P35749; P35579; Q7Z406	0	2	0.8431	0	1	1	863.979	1726.95	1726.95	1.06	0.00092	HCD (High Energy Collision Dissociation)	MS2	0.293553	9.746	58.3218	50768	MS201900090_4_PKA.raw	F4		102	44	37	1.90207e-08	0	9.987e-08	968511488	57.81
		FALSE	High	Mascot (A5)	Unambiguous	[KR].QLLQANPILEAFGNAK.[T]		3	3	P35749; P35579; Q7Z406	P35749; P35579; Q7Z406	0	2	1	0	1	1	863.978	1726.95	1726.95	-0.05	-4e-05	HCD (High Energy Collision Dissociation)	MS2		25	61.7705	54698	MS201900090_4_PKA.raw	F4		60	44	37	0.000283444	0	3.457e-06	1.419e+06	61.84
		FALSE	High	Mascot (A5)	Unambiguous	[KR].QLLQANPILEAFGNAK.[T]		3	3	P35749; P35579; Q7Z406	P35749; P35579; Q7Z406	0	2	0.9836	0	1	1	863.977	1726.95	1726.95	-0.88	-0.00076	HCD (High Energy Collision Dissociation)	MS2	21.804	25	62.7377	55777	MS201900090_4_PKA.raw	F4		61	44	37	0.000255674	0	5.037e-07	1.419e+06	61.84
		FALSE	High	Mascot (A5)	Unambiguous	[KR].QLLQANPILEAFGNAK.[T]		3	3	P35749; P35579; Q7Z406	P35749; P35579; Q7Z406	0	2	0.918	0	1	1	863.977	1726.95	1726.95	-1.23	-0.00106	HCD (High Energy Collision Dissociation)	MS2	30.0132	25	63.7891	57021	MS201900090_4_PKA.raw	F4		61	44	37	0.000230885	0	1.032e-05	1.419e+06	61.84
		FALSE	High	Mascot (A5)	Unambiguous	[KR].QLLQANPILEAFGNAK.[T]		3	3	P35749; P35579; Q7Z406	P35749; P35579; Q7Z406	0	2	1	0	1	1	863.976	1726.94	1726.95	-2.44	-0.00211	HCD (High Energy Collision Dissociation)	MS2	0	25	62.2454	55213	MS201900090_4_PKA.raw	F4		67	44	37	6.72884e-05	0	6.152e-08	1.419e+06	61.84
		FALSE	High	Mascot (A5)	Unambiguous	[KR].QLLQANPILEAFGNAK.[T]		3	3	P35749; P35579; Q7Z406	P35749; P35579; Q7Z406	0	2	0.9024	0	1	1	863.978	1726.95	1726.95	0.4	0.00034	HCD (High Energy Collision Dissociation)	MS2	28.7836	16.697	58.7958	51300	MS201900090_4_PKA.raw	F4		82	44	37	1.97309e-06	0	1.904e-07	968511488	57.81
		FALSE	High	Mascot (A5)	Unambiguous	[KR].QLLQANPILEAFGNAK.[T]		3	3	P35749; P35579; Q7Z406	P35749; P35579; Q7Z406	0	2	0.918	0	1	1	863.976	1726.94	1726.95	-2.37	-0.00204	HCD (High Energy Collision Dissociation)	MS2	2.39219	5.056	72.9834	67634	MS201900090_4_PKA.raw	F4		61	44	37	0.000253478	8.015e-05	0.0001877
		FALSE	High	Mascot (A5)	Unambiguous	[KR].QLLQANPILEAFGNAK.[T]		3	3	P35749; P35579; Q7Z406	P35749; P35579; Q7Z406	0	2	1	0	1	1	863.977	1726.95	1726.95	-0.92	-0.00079	HCD (High Energy Collision Dissociation)	MS2	90.4924	25	66.9799	60737	MS201900090_4_PKA.raw	F4		23	44	37	1.59473	8.015e-05	0.0004449
		FALSE	High	Mascot (A5)	Unambiguous	[KR].QLLQANPILEAFGNAK.[T]		3	3	P35749; P35579; Q7Z406	P35749; P35579; Q7Z406	0	2	1	0	1	1	863.978	1726.95	1726.95	-0.25	-0.00021	HCD (High Energy Collision Dissociation)	MS2	41.1137	25	63.2884	56430	MS201900090_4_PKA.raw	F4		34	44	37	0.106659	8.015e-05	4.963e-05	1.419e+06	61.84
		FALSE	High	Mascot (A5)	Unambiguous	[KR].QLLQANPILEAFGNAK.[T]		3	3	P35749; P35579; Q7Z406	P35749; P35579; Q7Z406	0	2	1	0	1	1	863.979	1726.95	1726.95	1.2	0.00103	HCD (High Energy Collision Dissociation)	MS2	39.1176	25	65.6548	59184	MS201900090_4_PKA.raw	F4		37	44	37	0.0575464	8.015e-05	7.564e-05
		FALSE	High	Mascot (A5)	Unambiguous	[KR].QLLQANPILEAFGNAK.[T]		3	3	P35749; P35579; Q7Z406	P35749; P35579; Q7Z406	0	2	1	0	1	1	863.979	1726.95	1726.95	1.37	0.00118	HCD (High Energy Collision Dissociation)	MS2	45.4688	25	65.2422	58697	MS201900090_4_PKA.raw	F4		42	44	37	0.0186969	8.015e-05	3.286e-05
		FALSE	High	Mascot (A5)	Unambiguous	[KR].QLLQANPILEAFGNAK.[T]		3	3	P35749; P35579; Q7Z406	P35749; P35579; Q7Z406	0	2	0.9818	0	1	1	863.98	1726.95	1726.95	2.21	0.00191	HCD (High Energy Collision Dissociation)	MS2	19.9719	25	65.3879	58868	MS201900090_4_PKA.raw	F4		55	44	37	0.000781658	8.015e-05	6.154e-05
		FALSE	High	Mascot (A5)	Unambiguous	[KR].QLLQANPILEAFGNAK.[T]		3	3	P35749; P35579; Q7Z406	P35749; P35579; Q7Z406	0	2	1	0	1	1	863.98	1726.95	1726.95	2.88	0.00249	HCD (High Energy Collision Dissociation)	MS2	27.4549	25	64.2822	57602	MS201900090_4_PKA.raw	F4		29	44	37	0.364811	8.015e-05	0.0006655
		FALSE	High	Mascot (A5)	Unambiguous	[KR].QLLQANPILEAFGNAK.[T]		3	3	P35749; P35579; Q7Z406	P35749; P35579; Q7Z406	0	2	1	0	1	1	863.981	1726.95	1726.95	3.36	0.0029	HCD (High Energy Collision Dissociation)	MS2	87.6941	25	65.137	58578	MS201900090_4_PKA.raw	F4		26	44	37	0.625288	8.015e-05	0.000129
		FALSE	High	Mascot (A5)	Unambiguous	[KR].QLLQANPILEAFGNAK.[T]		3	3	P35749; P35579; Q7Z406	P35749; P35579; Q7Z406	0	2	1	0	1	1	863.971	1726.94	1726.95	-7.73	-0.00667	HCD (High Energy Collision Dissociation)	MS2		25	67.769	61655	MS201900090_4_PKA.raw	F4		30	45	38	0.325799	8.015e-05	0.0003578
		FALSE	High	Mascot (A5)	Unambiguous	[KR].QLLQANPILEAFGNAK.[T]		3	3	P35749; P35579; Q7Z406	P35749; P35579; Q7Z406	0	2	1	0	1	1	863.971	1726.94	1726.95	-7.69	-0.00664	HCD (High Energy Collision Dissociation)	MS2	25.6448	25	69.7791	63969	MS201900090_4_PKA.raw	F4		23	45	38	1.8448	0.0001341	0.001984
		FALSE	High	Mascot (A5)	Unambiguous	[KR].QLLQANPILEAFGNAK.[T]		3	3	P35749; P35579; Q7Z406	P35749; P35579; Q7Z406	0	2	1	0	1	1	863.967	1726.93	1726.95	-13.13	-0.01133	HCD (High Energy Collision Dissociation)	MS2	32.2603	25	71.7247	66188	MS201900090_4_PKA.raw	F4	Not Reliable	21	45	38	3.05205	0.0002495	0.005487
		FALSE	High	Mascot (A5)	Unambiguous	[KR].QLLQANPILEAFGNAK.[T]		3	3	P35749; P35579; Q7Z406	P35749; P35579; Q7Z406	0	2	0.4286	0	1	1	863.981	1726.95	1726.95	3.31	0.00286	HCD (High Energy Collision Dissociation)	MS2	22.0183	25	70.426	64722	MS201900090_4_PKA.raw	F4		7	44	37	54.2101	0.0009002	0.01633
	FALSE	High	[R].QAQQERDELADEIANSSGK.[G]	1xAcetyl [N-Term]	P35579 1xAcetyl [N-Term]	5.99951e-05	0	1	1	1	P35579	P35579 [1698-1716]	1	2130.99	0	100		High	High	0	2.626e-05	21	29.95	R.QAQQERDELADEIANSSGK.G	[1698-1716]	1xAcetyl [N-Term]	Used
		Checked	Confidence	Identifying Node	PSM Ambiguity	Annotated Sequence	Modifications	# Protein Groups	# Proteins	Master Protein Accessions	Protein Accessions	# Missed Cleavages	Charge	DeltaScore	DeltaCn	Rank	Search Engine Rank	m/z [Da]	MH+ [Da]	Theo. MH+ [Da]	DeltaM [ppm]	Deltam/z [Da]	Activation Type	MS Order	Isolation Interference [%]	Ion Inject Time [ms]	RT [min]	First Scan	Spectrum File	File ID	Quan Info	Ions Score	Identity Strict	Identity Relaxed	Expectation Value	Percolator q-Value	Percolator PEP	Precursor Abundance	Apex RT [min]
		FALSE	High	Mascot (A5)	Unambiguous	[R].qAQQERDELADEIANSSGK.[G]	N-Term(Acetyl)	1	1	P35579	P35579	1	3	1	0	1	1	711.001	2130.99	2130.99	-0.89	-0.00063	HCD (High Energy Collision Dissociation)	MS2	44.8876	25	29.9264	20008	MS201900090_4_PKA.raw	F4		21	50	43	8.67142	0	2.626e-05	1.46586e+06	29.95
	FALSE	High	[R].QAQQERDELADEIANSSGK.[G]			2.95681e-05	0	1	1	5	P35579	P35579 [1698-1716]	1	2088.98	0	100		High	High	0	1.223e-05	38	22.68	R.QAQQERDELADEIANSSGK.G	[1698-1716]		Used
		Checked	Confidence	Identifying Node	PSM Ambiguity	Annotated Sequence	Modifications	# Protein Groups	# Proteins	Master Protein Accessions	Protein Accessions	# Missed Cleavages	Charge	DeltaScore	DeltaCn	Rank	Search Engine Rank	m/z [Da]	MH+ [Da]	Theo. MH+ [Da]	DeltaM [ppm]	Deltam/z [Da]	Activation Type	MS Order	Isolation Interference [%]	Ion Inject Time [ms]	RT [min]	First Scan	Spectrum File	File ID	Quan Info	Ions Score	Identity Strict	Identity Relaxed	Expectation Value	Percolator q-Value	Percolator PEP	Precursor Abundance	Apex RT [min]
		FALSE	High	Mascot (A5)	Unambiguous	[R].QAQQERDELADEIANSSGK.[G]		1	1	P35579	P35579	1	3	1	0	1	1	696.998	2088.98	2088.98	0.38	0.00027	HCD (High Energy Collision Dissociation)	MS2	50.414	10.367	22.5061	12215	MS201900090_4_PKA.raw	F4		30	50	43	1.27726	0	2.233e-05	232752144	22.68
		FALSE	High	Mascot (A5)	Unambiguous	[R].QAQQERDELADEIANSSGK.[G]		1	1	P35579	P35579	1	3	0.7895	0	1	1	696.998	2088.98	2088.98	0.36	0.00025	HCD (High Energy Collision Dissociation)	MS2	3.27581	24.599	22.9807	12770	MS201900090_4_PKA.raw	F4		38	50	43	0.190198	0	1.223e-05	232752144	22.68
		FALSE	High	Mascot (A5)	Unambiguous	[R].QAQQERDELADEIANSSGK.[G]		1	1	P35579	P35579	1	3	1	0	1	1	696.997	2088.98	2088.98	-0.97	-0.00067	HCD (High Energy Collision Dissociation)	MS2	84.9045	25	21.7436	11359	MS201900090_4_PKA.raw	F4		9	50	43	135.789	8.015e-05	0.0006111	674130	21.8
		FALSE	High	Mascot (A5)	Unambiguous	[R].QAQQERDELADEIANSSGK.[G]		1	1	P35579	P35579	1	3	1	0	1	1	696.998	2088.98	2088.98	0.48	0.00034	HCD (High Energy Collision Dissociation)	MS2	73.5219	25	21.0366	10555	MS201900090_4_PKA.raw	F4		18	50	43	18.257	8.015e-05	3.305e-05	1.95192e+06	21.11
		FALSE	High	Mascot (A5)	Unambiguous	[R].QAQQERDELADEIANSSGK.[G]		1	1	P35579	P35579	1	3	0.9091	0	1	1	696.998	2088.98	2088.98	-0.46	-0.00032	HCD (High Energy Collision Dissociation)	MS2	0	18.895	23.6501	13455	MS201900090_4_PKA.raw	F4		11	50	43	81.914	0.0003085	0.006181	232752144	22.68
	FALSE	High	[K].RQAQQERDELADEIANSSGK.[G]			4.62835e-08	0	1	1	1	P35579	P35579 [1697-1716]	2	2245.08	0	100		High	High	0	1.132e-08	45	18.51	K.RQAQQERDELADEIANSSGK.G	[1697-1716]		Used
		Checked	Confidence	Identifying Node	PSM Ambiguity	Annotated Sequence	Modifications	# Protein Groups	# Proteins	Master Protein Accessions	Protein Accessions	# Missed Cleavages	Charge	DeltaScore	DeltaCn	Rank	Search Engine Rank	m/z [Da]	MH+ [Da]	Theo. MH+ [Da]	DeltaM [ppm]	Deltam/z [Da]	Activation Type	MS Order	Isolation Interference [%]	Ion Inject Time [ms]	RT [min]	First Scan	Spectrum File	File ID	Quan Info	Ions Score	Identity Strict	Identity Relaxed	Expectation Value	Percolator q-Value	Percolator PEP	Precursor Abundance	Apex RT [min]
		FALSE	High	Mascot (A5)	Unambiguous	[K].RQAQQERDELADEIANSSGK.[G]		1	1	P35579	P35579	2	3	1	0	1	1	749.032	2245.08	2245.08	0.62	0.00047	HCD (High Energy Collision Dissociation)	MS2	7.85495	25	18.3672	7753	MS201900090_4_PKA.raw	F4		45	50	43	0.0377473	0	1.132e-08	32307022	18.51
	FALSE	High	[R].RKLEGDSTDLSDQIAELQAQIAELK.[M]			2.17305e-09	0	1	1	3	P35579	P35579 [1051-1075]	2	2771.44	0	100		High	High	0	4.138e-10	60	60.28	R.RKLEGDSTDLSDQIAELQAQIAELK.M	[1051-1075]		Used
		Checked	Confidence	Identifying Node	PSM Ambiguity	Annotated Sequence	Modifications	# Protein Groups	# Proteins	Master Protein Accessions	Protein Accessions	# Missed Cleavages	Charge	DeltaScore	DeltaCn	Rank	Search Engine Rank	m/z [Da]	MH+ [Da]	Theo. MH+ [Da]	DeltaM [ppm]	Deltam/z [Da]	Activation Type	MS Order	Isolation Interference [%]	Ion Inject Time [ms]	RT [min]	First Scan	Spectrum File	File ID	Quan Info	Ions Score	Identity Strict	Identity Relaxed	Expectation Value	Percolator q-Value	Percolator PEP	Precursor Abundance	Apex RT [min]
		FALSE	High	Mascot (A5)	Unambiguous	[R].RKLEGDSTDLSDQIAELQAQIAELK.[M]		1	1	P35579	P35579	2	3	0.5854	0	1	1	924.483	2771.44	2771.44	-2.45	-0.00226	HCD (High Energy Collision Dissociation)	MS2	30.067	25	60.6388	53401	MS201900090_4_PKA.raw	F4		41	48	41	0.046254	0	5.717e-06	10817697	60.28
		FALSE	High	Mascot (A5)	Unambiguous	[R].RKLEGDSTDLSDQIAELQAQIAELK.[M]		1	1	P35579	P35579	2	3	0.5	0	1	1	924.486	2771.44	2771.44	0.25	0.00023	HCD (High Energy Collision Dissociation)	MS2	0.565552	15.459	60.1923	52867	MS201900090_4_PKA.raw	F4		60	47	40	0.000640215	0	4.138e-10	10817697	60.28
		FALSE	High	Mascot (A5)	Unambiguous	[R].RKLEGDSTDLSDQIAELQAQIAELK.[M]		1	1	P35579	P35579	2	3	1	0	1	1	924.484	2771.44	2771.44	-1.56	-0.00144	HCD (High Energy Collision Dissociation)	MS2	71.1046	25	62.5714	55591	MS201900090_4_PKA.raw	F4		12	47	40	41.2001	0.0001341	0.00206	454923	62.76
	FALSE	High	[R].RGDLPFVVPR.[R]			8.11126e-06	0	1	1	7	P35579	P35579 [1923-1932]	1	1155.66	0	100		High	High	0	1.657e-05	65	28.4	R.RGDLPFVVPR.R	[1923-1932]		Used
		Checked	Confidence	Identifying Node	PSM Ambiguity	Annotated Sequence	Modifications	# Protein Groups	# Proteins	Master Protein Accessions	Protein Accessions	# Missed Cleavages	Charge	DeltaScore	DeltaCn	Rank	Search Engine Rank	m/z [Da]	MH+ [Da]	Theo. MH+ [Da]	DeltaM [ppm]	Deltam/z [Da]	Activation Type	MS Order	Isolation Interference [%]	Ion Inject Time [ms]	RT [min]	First Scan	Spectrum File	File ID	Quan Info	Ions Score	Identity Strict	Identity Relaxed	Expectation Value	Percolator q-Value	Percolator PEP	Precursor Abundance	Apex RT [min]
		FALSE	High	Mascot (A5)	Unambiguous	[R].RGDLPFVVPR.[R]		1	1	P35579	P35579	1	2	0.8462	0	1	1	578.335	1155.66	1155.66	0.29	0.00017	HCD (High Energy Collision Dissociation)	MS2	0	3.027	28.6752	18604	MS201900090_4_PKA.raw	F4		65	43	36	6.89584e-05	0	1.657e-05	764691328	28.4
		FALSE	High	Mascot (A5)	Unambiguous	[R].RGDLPFVVPR.[R]		1	1	P35579	P35579	1	2	0.8182	0	1	1	578.334	1155.66	1155.66	-1.43	-0.00082	HCD (High Energy Collision Dissociation)	MS2	64.8684	25	28.2	18086	MS201900090_4_PKA.raw	F4		55	43	36	0.000588235	0	3.015e-06	764691328	28.4
		FALSE	High	Mascot (A5)	Unambiguous	[R].RGDLPFVVPR.[R]		1	1	P35579	P35579	1	2	0.8	0	1	1	578.336	1155.66	1155.66	0.53	0.00031	HCD (High Energy Collision Dissociation)	MS2	13.354	22.927	29.1752	19165	MS201900090_4_PKA.raw	F4		50	42	35	0.0018749	0	1.626e-05	764691328	28.4
		FALSE	High	Mascot (A5)	Unambiguous	[R].RGDLPFVVPR.[R]		1	1	P35579	P35579	1	2	0.6957	0	1	1	578.337	1155.67	1155.66	2.91	0.00168	HCD (High Energy Collision Dissociation)	MS2	27.3768	25	30.1017	20203	MS201900090_4_PKA.raw	F4		23	43	36	1.12476	0.0001341	0.002634	764691328	28.4
		FALSE	High	Mascot (A5)	Unambiguous	[R].RGDLPFVVPR.[R]		1	1	P35579	P35579	1	2	0.84	0	1	1	578.337	1155.67	1155.66	2.89	0.00167	HCD (High Energy Collision Dissociation)	MS2	71.793	25	31.4229	21613	MS201900090_4_PKA.raw	F4		25	43	36	0.58757	0.0007892	0.01594
		FALSE	High	Mascot (A5)	Unambiguous	[R].RGDLPFVVPR.[R]		1	1	P35579	P35579	1	2	1	0	1	1	578.335	1155.66	1155.66	0.14	8e-05	HCD (High Energy Collision Dissociation)	MS2	71.2354	25	29.6369	19692	MS201900090_4_PKA.raw	F4		4	43	36	86.4146	0.002515	0.05993	764691328	28.4
		FALSE	High	Mascot (A5)	Unambiguous	[R].RGDLPFVVPR.[R]		1	1	P35579	P35579	1	2	0.6818	0	1	1	578.334	1155.66	1155.66	-1.68	-0.00097	HCD (High Energy Collision Dissociation)	MS2	0	25	30.8676	21016	MS201900090_4_PKA.raw	F4		22	43	36	1.28817	0.00629	0.1433	1.48946e+06	30.8
	FALSE	High	[K].QTLENERGELANEVK.[V]	1xAcetyl [N-Term]	P35579 1xAcetyl [N-Term]	2.91215e-05	0	1	1	1	P35579	P35579 [1220-1234]	1	1771.88	0	100		High	High	0	1.197e-05	15	24.05	K.QTLENERGELANEVK.V	[1220-1234]	1xAcetyl [N-Term]	Used
		Checked	Confidence	Identifying Node	PSM Ambiguity	Annotated Sequence	Modifications	# Protein Groups	# Proteins	Master Protein Accessions	Protein Accessions	# Missed Cleavages	Charge	DeltaScore	DeltaCn	Rank	Search Engine Rank	m/z [Da]	MH+ [Da]	Theo. MH+ [Da]	DeltaM [ppm]	Deltam/z [Da]	Activation Type	MS Order	Isolation Interference [%]	Ion Inject Time [ms]	RT [min]	First Scan	Spectrum File	File ID	Quan Info	Ions Score	Identity Strict	Identity Relaxed	Expectation Value	Percolator q-Value	Percolator PEP	Precursor Abundance	Apex RT [min]
		FALSE	High	Mascot (A5)	Unambiguous	[K].qTLENERGELANEVK.[V]	N-Term(Acetyl)	1	1	P35579	P35579	1	2	0.5333	0	1	1	886.448	1771.89	1771.88	3.36	0.00298	HCD (High Energy Collision Dissociation)	MS2	65.6373	25	24.0065	13800	MS201900090_4_PKA.raw	F4		15	48	41	20.4161	0	1.197e-05	4.02094e+06	24.05
	FALSE	High	[K].NMDPLNDNIATLLHQSSDK.[F]	1xAcetyl [N-Term]; 1xOxidation [M2]	P35579 1xAcetyl [N-Term]	2.6837e-07	0	1	1	3	P35579	P35579 [588-606]	0	2184.02	0	100		High	High	0	7.78e-08	73	51.08	K.NMDPLNDNIATLLHQSSDK.F	[588-606]	1xAcetyl [N-Term]	Used
		Checked	Confidence	Identifying Node	PSM Ambiguity	Annotated Sequence	Modifications	# Protein Groups	# Proteins	Master Protein Accessions	Protein Accessions	# Missed Cleavages	Charge	DeltaScore	DeltaCn	Rank	Search Engine Rank	m/z [Da]	MH+ [Da]	Theo. MH+ [Da]	DeltaM [ppm]	Deltam/z [Da]	Activation Type	MS Order	Isolation Interference [%]	Ion Inject Time [ms]	RT [min]	First Scan	Spectrum File	File ID	Quan Info	Ions Score	Identity Strict	Identity Relaxed	Expectation Value	Percolator q-Value	Percolator PEP	Precursor Abundance	Apex RT [min]
		FALSE	High	Mascot (A5)	Unambiguous	[K].nmDPLNDNIATLLHQSSDK.[F]	N-Term(Acetyl); M2(Oxidation)	1	1	P35579	P35579	0	2	1	0	1	1	1092.51	2184.02	2184.02	-1.37	-0.0015	HCD (High Energy Collision Dissociation)	MS2	0	25	51.2209	43156	MS201900090_4_PKA.raw	F4		73	51	44	5.89997e-05	0	7.78e-08	2.08242e+06	51.1
		FALSE	High	Mascot (A5)	Unambiguous	[K].nmDPLNDNIATLLHQSSDK.[F]	N-Term(Acetyl); M2(Oxidation)	1	1	P35579	P35579	0	3	1	0	1	1	728.678	2184.02	2184.02	-1.5	-0.00109	HCD (High Energy Collision Dissociation)	MS2	17.698	25	50.9625	42871	MS201900090_4_PKA.raw	F4		52	51	44	0.00769948	0	7.524e-08	2791794	51.08
		FALSE	High	Mascot (A5)	Unambiguous	[K].nmDPLNDNIATLLHQSSDK.[F]	N-Term(Acetyl); M2(Oxidation)	1	1	P35579	P35579	0	3	0.963	0	1	1	728.68	2184.03	2184.02	0.66	0.00048	HCD (High Energy Collision Dissociation)	MS2	62.5662	25	52.3153	44323	MS201900090_4_PKA.raw	F4		27	50	43	2.24871	0	2.142e-05	617520	52.38
	FALSE	High	[K].NMDPLNDNIATLLHQSSDK.[F]	1xAcetyl [N-Term]	P35579 1xAcetyl [N-Term]	5.47169e-08	0	1	1	6	P35579	P35579 [588-606]	0	2168.03	0	100		High	High	0	3.125e-06	66	50.01	K.NMDPLNDNIATLLHQSSDK.F	[588-606]	1xAcetyl [N-Term]	Used
		Checked	Confidence	Identifying Node	PSM Ambiguity	Annotated Sequence	Modifications	# Protein Groups	# Proteins	Master Protein Accessions	Protein Accessions	# Missed Cleavages	Charge	DeltaScore	DeltaCn	Rank	Search Engine Rank	m/z [Da]	MH+ [Da]	Theo. MH+ [Da]	DeltaM [ppm]	Deltam/z [Da]	Activation Type	MS Order	Isolation Interference [%]	Ion Inject Time [ms]	RT [min]	First Scan	Spectrum File	File ID	Quan Info	Ions Score	Identity Strict	Identity Relaxed	Expectation Value	Percolator q-Value	Percolator PEP	Precursor Abundance	Apex RT [min]
		FALSE	High	Mascot (A5)	Unambiguous	[K].nMDPLNDNIATLLHQSSDK.[F]	N-Term(Acetyl)	1	1	P35579	P35579	0	2	1	0	1	1	1084.53	2168.05	2168.03	10	0.01084	HCD (High Energy Collision Dissociation)	MS2	50.0806	25	57.5292	49864	MS201900090_4_PKA.raw	F4		66	50	43	0.000250286	0	3.125e-06
		FALSE	High	Mascot (A5)	Unambiguous	[K].nMDPLNDNIATLLHQSSDK.[F]	N-Term(Acetyl)	1	1	P35579	P35579	0	2	0.8929	0	1	1	1084.52	2168.03	2168.03	-0.34	-0.00037	HCD (High Energy Collision Dissociation)	MS2		25	60.4463	53173	MS201900090_4_PKA.raw	F4		56	50	43	0.00268753	0	1.35e-08	680460	60.46
		FALSE	High	Mascot (A5)	Unambiguous	[K].nMDPLNDNIATLLHQSSDK.[F]	N-Term(Acetyl)	1	1	P35579	P35579	0	3	1	0	1	1	723.347	2168.03	2168.03	-1.52	-0.0011	HCD (High Energy Collision Dissociation)	MS2	0	25	57.5727	49917	MS201900090_4_PKA.raw	F4		65	50	43	0.000340936	0	1.699e-08	621536	57.72
		FALSE	High	Mascot (A5)	Unambiguous	[K].nMDPLNDNIATLLHQSSDK.[F]	N-Term(Acetyl)	1	1	P35579	P35579	0	3	1	0	1	1	723.345	2168.02	2168.03	-3.21	-0.00232	HCD (High Energy Collision Dissociation)	MS2	49.0303	25	50.1247	41916	MS201900090_4_PKA.raw	F4		23	50	43	6.2557	0	1.886e-05	941568	50.01
		FALSE	High	Mascot (A5)	Unambiguous	[K].nMDPLNDNIATLLHQSSDK.[F]	N-Term(Acetyl)	1	1	P35579	P35579	0	2	0.9444	0	1	1	1084.5	2167.99	2168.03	-15.79	-0.01712	HCD (High Energy Collision Dissociation)	MS2	0	25	53.7756	45955	MS201900090_4_PKA.raw	F4		36	51	44	0.320161	8.015e-05	0.0006776	610523	53.76
		FALSE	High	Mascot (A5)	Unambiguous	[K].nMDPLNDNIATLLHQSSDK.[F]	N-Term(Acetyl)	1	1	P35579	P35579	0	2	0.95	0	1	1	1084.51	2168.02	2168.03	-3.41	-0.00369	HCD (High Energy Collision Dissociation)	MS2	25.2732	25	53.6709	45842	MS201900090_4_PKA.raw	F4	Not Reliable	20	50	43	11.9352	0.001301	0.02702
	FALSE	High	[K].NMDPLNDNIATLLHQSSDK.[F]	1xOxidation [M2]		7.95966e-10	0	1	1	9	P35579	P35579 [588-606]	0	2142.01	0	100		High	High	0	3.436e-09	79	42.12	K.NMDPLNDNIATLLHQSSDK.F	[588-606]		Used
		Checked	Confidence	Identifying Node	PSM Ambiguity	Annotated Sequence	Modifications	# Protein Groups	# Proteins	Master Protein Accessions	Protein Accessions	# Missed Cleavages	Charge	DeltaScore	DeltaCn	Rank	Search Engine Rank	m/z [Da]	MH+ [Da]	Theo. MH+ [Da]	DeltaM [ppm]	Deltam/z [Da]	Activation Type	MS Order	Isolation Interference [%]	Ion Inject Time [ms]	RT [min]	First Scan	Spectrum File	File ID	Quan Info	Ions Score	Identity Strict	Identity Relaxed	Expectation Value	Percolator q-Value	Percolator PEP	Precursor Abundance	Apex RT [min]
		FALSE	High	Mascot (A5)	Unambiguous	[K].NmDPLNDNIATLLHQSSDK.[F]	M2(Oxidation)	1	1	P35579	P35579	0	2	1	0	1	1	1071.51	2142.01	2142.01	0.84	0.0009	HCD (High Energy Collision Dissociation)	MS2	73.1453	25	45.9294	37230	MS201900090_4_PKA.raw	F4		70	50	43	0.000120418	0	1.274e-08
		FALSE	High	Mascot (A5)	Unambiguous	[K].NmDPLNDNIATLLHQSSDK.[F]	M2(Oxidation)	1	1	P35579	P35579	0	3	0.871	0	1	1	714.677	2142.02	2142.01	1.05	0.00075	HCD (High Energy Collision Dissociation)	MS2	40.0212	25	45.4039	36643	MS201900090_4_PKA.raw	F4		31	50	43	1.01178	0	1.483e-06	12835786	45.53
		FALSE	High	Mascot (A5)	Unambiguous	[K].NmDPLNDNIATLLHQSSDK.[F]	M2(Oxidation)	1	1	P35579	P35579	0	3	1	0	1	1	714.676	2142.01	2142.01	0.7	0.0005	HCD (High Energy Collision Dissociation)	MS2	14.1981	25	42.6254	33716	MS201900090_4_PKA.raw	F4		67	50	43	0.000213833	0	2.96e-10	199105456	42.12
		FALSE	High	Mascot (A5)	Unambiguous	[K].NmDPLNDNIATLLHQSSDK.[F]	M2(Oxidation)	1	1	P35579	P35579	0	3	1	0	1	1	714.676	2142.01	2142.01	0.57	0.0004	HCD (High Energy Collision Dissociation)	MS2	10.4204	25	43.4588	34679	MS201900090_4_PKA.raw	F4		53	50	43	0.00586417	0	1.158e-08	199105456	42.12
		FALSE	High	Mascot (A5)	Unambiguous	[K].NmDPLNDNIATLLHQSSDK.[F]	M2(Oxidation)	1	1	P35579	P35579	0	3	1	0	1	1	714.676	2142.01	2142.01	0.38	0.00027	HCD (High Energy Collision Dissociation)	MS2	0.565903	2.148	42.2917	33340	MS201900090_4_PKA.raw	F4		79	50	43	1.32317e-05	0	3.436e-09	199105456	42.12
		FALSE	High	Mascot (A5)	Unambiguous	[K].NmDPLNDNIATLLHQSSDK.[F]	M2(Oxidation)	1	1	P35579	P35579	0	3	1	0	1	1	714.676	2142.01	2142.01	0.06	4e-05	HCD (High Energy Collision Dissociation)	MS2	26.9929	18.972	43.3702	34584	MS201900090_4_PKA.raw	F4		47	50	43	0.0209235	0	6.861e-10	199105456	42.12
		FALSE	High	Mascot (A5)	Unambiguous	[K].NmDPLNDNIATLLHQSSDK.[F]	M2(Oxidation)	1	1	P35579	P35579	0	3	1	0	1	1	714.675	2142.01	2142.01	-0.69	-0.00049	HCD (High Energy Collision Dissociation)	MS2	20.0178	14.336	41.8624	32894	MS201900090_4_PKA.raw	F4		65	50	43	0.000371035	0	1.388e-10	199105456	42.12
		FALSE	High	Mascot (A5)	Unambiguous	[K].NmDPLNDNIATLLHQSSDK.[F]	M2(Oxidation)	1	1	P35579	P35579	0	3	1	0	1	1	714.673	2142	2142.01	-4.66	-0.00332	HCD (High Energy Collision Dissociation)	MS2	27.5649	25	46.1694	37503	MS201900090_4_PKA.raw	F4		12	50	43	69.9847	8.015e-05	0.0001937	12835786	45.53
		FALSE	High	Mascot (A5)	Unambiguous	[K].NmDPLNDNIATLLHQSSDK.[F]	M2(Oxidation)	1	1	P35579	P35579	0	2	0.5714	0	1	1	1071.49	2141.98	2142.01	-15.73	-0.01685	HCD (High Energy Collision Dissociation)	MS2		17.286	51.2746	43214	MS201900090_4_PKA.raw	F4		14	51	44	48.255	0.0001341	0.0009495	2.40803e+06	51.42
	FALSE	High	[K].NMDPLNDNIATLLHQSSDK.[F]			1.91478e-08	0	1	1	6	P35579	P35579 [588-606]	0	2126.02	0	100		High	High	0	4.347e-09	88	47.22	K.NMDPLNDNIATLLHQSSDK.F	[588-606]		Used
		Checked	Confidence	Identifying Node	PSM Ambiguity	Annotated Sequence	Modifications	# Protein Groups	# Proteins	Master Protein Accessions	Protein Accessions	# Missed Cleavages	Charge	DeltaScore	DeltaCn	Rank	Search Engine Rank	m/z [Da]	MH+ [Da]	Theo. MH+ [Da]	DeltaM [ppm]	Deltam/z [Da]	Activation Type	MS Order	Isolation Interference [%]	Ion Inject Time [ms]	RT [min]	First Scan	Spectrum File	File ID	Quan Info	Ions Score	Identity Strict	Identity Relaxed	Expectation Value	Percolator q-Value	Percolator PEP	Precursor Abundance	Apex RT [min]
		FALSE	High	Mascot (A5)	Unambiguous	[K].NMDPLNDNIATLLHQSSDK.[F]		1	1	P35579	P35579	0	2	1	0	1	1	1063.51	2126.01	2126.02	-3.5	-0.00372	HCD (High Energy Collision Dissociation)	MS2	0	25	48.1527	39704	MS201900090_4_PKA.raw	F4		43	50	43	0.061718	0	1.024e-05	1.35958e+06	48.64
		FALSE	High	Mascot (A5)	Unambiguous	[K].NMDPLNDNIATLLHQSSDK.[F]		1	1	P35579	P35579	0	3	1	0	1	1	709.345	2126.02	2126.02	0.34	0.00024	HCD (High Energy Collision Dissociation)	MS2	63.0359	25	47.648	39170	MS201900090_4_PKA.raw	F4		31	50	43	0.803538	0	2.14e-06	70180160	47.22
		FALSE	High	Mascot (A5)	Unambiguous	[K].NMDPLNDNIATLLHQSSDK.[F]		1	1	P35579	P35579	0	3	1	0	1	1	709.345	2126.02	2126.02	1.69	0.0012	HCD (High Energy Collision Dissociation)	MS2	0	3.187	47.1529	38633	MS201900090_4_PKA.raw	F4		88	50	43	1.86956e-06	0	4.347e-09	70180160	47.22
		FALSE	High	Mascot (A5)	Unambiguous	[K].NMDPLNDNIATLLHQSSDK.[F]		1	1	P35579	P35579	0	2	1	0	1	1	1063.51	2126	2126.02	-6.75	-0.00718	HCD (High Energy Collision Dissociation)	MS2	0	25	47.5378	39062	MS201900090_4_PKA.raw	F4		81	50	43	8.73764e-06	0	2.423e-08	43486136	47.22
		FALSE	High	Mascot (A5)	Unambiguous	[K].NMDPLNDNIATLLHQSSDK.[F]		1	1	P35579	P35579	0	3	1	0	1	1	709.349	2126.03	2126.02	6.58	0.00466	HCD (High Energy Collision Dissociation)	MS2	49.8205	25	53.4139	45544	MS201900090_4_PKA.raw	F4		14	50	43	38.5858	0.0004105	0.009367
		FALSE	High	Mascot (A5)	Unambiguous	[K].NMDPLNDNIATLLHQSSDK.[F]		1	1	P35579	P35579	0	2	1	0	1	1	1063.51	2126.01	2126.02	-3.13	-0.00333	HCD (High Energy Collision Dissociation)	MS2	14.673	25	48.6436	40257	MS201900090_4_PKA.raw	F4		4	50	43	433.67	0.001195	0.02413	1.35958e+06	48.64
	FALSE	High	[K].NKHEAMITDLEER.[L]			5.40426e-07	0	1	1	1	P35579	P35579 [1023-1035]	1	1585.76	0	100		High	High	0	1.614e-07	89	16.7	K.NKHEAMITDLEER.L	[1023-1035]		Used
		Checked	Confidence	Identifying Node	PSM Ambiguity	Annotated Sequence	Modifications	# Protein Groups	# Proteins	Master Protein Accessions	Protein Accessions	# Missed Cleavages	Charge	DeltaScore	DeltaCn	Rank	Search Engine Rank	m/z [Da]	MH+ [Da]	Theo. MH+ [Da]	DeltaM [ppm]	Deltam/z [Da]	Activation Type	MS Order	Isolation Interference [%]	Ion Inject Time [ms]	RT [min]	First Scan	Spectrum File	File ID	Quan Info	Ions Score	Identity Strict	Identity Relaxed	Expectation Value	Percolator q-Value	Percolator PEP	Precursor Abundance	Apex RT [min]
		FALSE	High	Mascot (A5)	Unambiguous	[K].NKHEAMITDLEER.[L]		1	1	P35579	P35579	1	3	0.7978	0	1	1	529.259	1585.76	1585.76	-1.03	-0.00055	HCD (High Energy Collision Dissociation)	MS2	0	25	16.5862	5832	MS201900090_4_PKA.raw	F4		89	48	41	8.89841e-07	0	1.614e-07	80587672	16.7
	FALSE	High	[K].NFINNPLAQADWAAKK.[L]			4.43427e-07	0	1	1	2	P35579	P35579 [15-30]	1	1800.94	0	100		High	High	0	1.295e-07	92	37.63	K.NFINNPLAQADWAAKK.L	[15-30]		Used
		Checked	Confidence	Identifying Node	PSM Ambiguity	Annotated Sequence	Modifications	# Protein Groups	# Proteins	Master Protein Accessions	Protein Accessions	# Missed Cleavages	Charge	DeltaScore	DeltaCn	Rank	Search Engine Rank	m/z [Da]	MH+ [Da]	Theo. MH+ [Da]	DeltaM [ppm]	Deltam/z [Da]	Activation Type	MS Order	Isolation Interference [%]	Ion Inject Time [ms]	RT [min]	First Scan	Spectrum File	File ID	Quan Info	Ions Score	Identity Strict	Identity Relaxed	Expectation Value	Percolator q-Value	Percolator PEP	Precursor Abundance	Apex RT [min]
		FALSE	High	Mascot (A5)	Unambiguous	[K].NFINNPLAQADWAAKK.[L]		1	1	P35579	P35579	1	2	1	0	1	1	900.972	1800.94	1800.94	-0.96	-0.00086	HCD (High Energy Collision Dissociation)	MS2	0	25	37.7295	28154	MS201900090_4_PKA.raw	F4		92	47	40	3.25415e-07	0	1.295e-07	1.47926e+06	37.7
		FALSE	High	Mascot (A5)	Unambiguous	[K].NFINNPLAQADWAAKK.[L]		1	1	P35579	P35579	1	3	1	0	1	1	600.985	1800.94	1800.94	1.36	0.00082	HCD (High Energy Collision Dissociation)	MS2	73.4481	25	37.5243	27924	MS201900090_4_PKA.raw	F4		8	47	40	88.8511	8.015e-05	0.0002016	2338253	37.63
	FALSE	High	[K].NLPIYSEEIVEMYK.[G]	1xAcetyl [N-Term]; 1xOxidation [M12]	P35579 1xAcetyl [N-Term]	4.10115e-05	0	1	1	1	P35579	P35579 [126-139]	0	1785.86	0		No Quan Values	High	High	0	1.742e-05	47		K.NLPIYSEEIVEMYK.G	[126-139]	1xAcetyl [N-Term]	Not Used
		Checked	Confidence	Identifying Node	PSM Ambiguity	Annotated Sequence	Modifications	# Protein Groups	# Proteins	Master Protein Accessions	Protein Accessions	# Missed Cleavages	Charge	DeltaScore	DeltaCn	Rank	Search Engine Rank	m/z [Da]	MH+ [Da]	Theo. MH+ [Da]	DeltaM [ppm]	Deltam/z [Da]	Activation Type	MS Order	Isolation Interference [%]	Ion Inject Time [ms]	RT [min]	First Scan	Spectrum File	File ID	Quan Info	Ions Score	Identity Strict	Identity Relaxed	Expectation Value	Percolator q-Value	Percolator PEP	Precursor Abundance	Apex RT [min]
		FALSE	High	Mascot (A5)	Unambiguous	[K].nLPIYSEEIVEmYK.[G]	N-Term(Acetyl); M12(Oxidation)	1	1	P35579	P35579	0	2	1	0	1	1	893.434	1785.86	1785.86	-0.01	-1e-05	HCD (High Energy Collision Dissociation)	MS2	19.6131	25	55.864	48256	MS201900090_4_PKA.raw	F4		47	48	42	0.0162293	0	1.742e-05
	FALSE	High	[K].NLPIYSEEIVEMYK.[G]	1xAcetyl [N-Term]	P35579 1xAcetyl [N-Term]	2.83849e-06	0	1	1	2	P35579	P35579 [126-139]	0	1769.87	0	100		High	High	0	9.687e-07	57	65.07	K.NLPIYSEEIVEMYK.G	[126-139]	1xAcetyl [N-Term]	Used
		Checked	Confidence	Identifying Node	PSM Ambiguity	Annotated Sequence	Modifications	# Protein Groups	# Proteins	Master Protein Accessions	Protein Accessions	# Missed Cleavages	Charge	DeltaScore	DeltaCn	Rank	Search Engine Rank	m/z [Da]	MH+ [Da]	Theo. MH+ [Da]	DeltaM [ppm]	Deltam/z [Da]	Activation Type	MS Order	Isolation Interference [%]	Ion Inject Time [ms]	RT [min]	First Scan	Spectrum File	File ID	Quan Info	Ions Score	Identity Strict	Identity Relaxed	Expectation Value	Percolator q-Value	Percolator PEP	Precursor Abundance	Apex RT [min]
		FALSE	High	Mascot (A5)	Unambiguous	[K].nLPIYSEEIVEMYK.[G]	N-Term(Acetyl)	1	1	P35579	P35579	0	2	1	0	1	1	885.439	1769.87	1769.87	1.99	0.00176	HCD (High Energy Collision Dissociation)	MS2	49.7996	25	67.6717	61545	MS201900090_4_PKA.raw	F4		57	48	41	0.00163174	0	9.687e-07
		FALSE	High	Mascot (A5)	Unambiguous	[K].nLPIYSEEIVEMYK.[G]	N-Term(Acetyl)	1	1	P35579	P35579	0	2	1	0	1	1	885.436	1769.86	1769.87	-1.34	-0.00119	HCD (High Energy Collision Dissociation)	MS2		25	65.0366	58461	MS201900090_4_PKA.raw	F4		43	48	41	0.0401263	8.015e-05	3.558e-05	410128	65.07
	FALSE	High	[K].NLPIYSEEIVEMYK.[G]	1xOxidation [M12]		4.6414e-07	0	1	1	18	P35579	P35579 [126-139]	0	1743.85	0	100		High	High	0	3.415e-06	100	45.77	K.NLPIYSEEIVEMYK.G	[126-139]		Used
		Checked	Confidence	Identifying Node	PSM Ambiguity	Annotated Sequence	Modifications	# Protein Groups	# Proteins	Master Protein Accessions	Protein Accessions	# Missed Cleavages	Charge	DeltaScore	DeltaCn	Rank	Search Engine Rank	m/z [Da]	MH+ [Da]	Theo. MH+ [Da]	DeltaM [ppm]	Deltam/z [Da]	Activation Type	MS Order	Isolation Interference [%]	Ion Inject Time [ms]	RT [min]	First Scan	Spectrum File	File ID	Quan Info	Ions Score	Identity Strict	Identity Relaxed	Expectation Value	Percolator q-Value	Percolator PEP	Precursor Abundance	Apex RT [min]
		FALSE	High	Mascot (A5)	Unambiguous	[K].NLPIYSEEIVEmYK.[G]	M12(Oxidation)	1	1	P35579	P35579	0	2	0.8947	0	1	1	872.433	1743.86	1743.85	4.26	0.00371	HCD (High Energy Collision Dissociation)	MS2	74.2447	25	52.0026	43992	MS201900090_4_PKA.raw	F4		19	48	41	9.4708	0	9.769e-06	1.28792e+06	52
		FALSE	High	Mascot (A5)	Unambiguous	[K].NLPIYSEEIVEmYK.[G]	M12(Oxidation)	1	1	P35579	P35579	0	2	0.8864	0	1	1	872.431	1743.86	1743.85	2.44	0.00212	HCD (High Energy Collision Dissociation)	MS2	5.16964	25	47.0594	38515	MS201900090_4_PKA.raw	F4		44	48	41	0.026361	0	8.495e-06	401443040	45.77
		FALSE	High	Mascot (A5)	Unambiguous	[K].NLPIYSEEIVEmYK.[G]	M12(Oxidation)	1	1	P35579	P35579	0	2	1	0	1	1	872.43	1743.85	1743.85	0.67	0.00058	HCD (High Energy Collision Dissociation)	MS2	51.3194	25	59.936	52569	MS201900090_4_PKA.raw	F4		35	48	41	0.241256	0	5.47e-06
		FALSE	High	Mascot (A5)	Unambiguous	[K].NLPIYSEEIVEmYK.[G]	M12(Oxidation)	1	1	P35579	P35579	0	2	1	0	1	1	872.43	1743.85	1743.85	0.66	0.00057	HCD (High Energy Collision Dissociation)	MS2	0	25	46.4083	37772	MS201900090_4_PKA.raw	F4		81	48	41	6.28749e-06	0	1.552e-06	401443040	45.77
		FALSE	High	Mascot (A5)	Unambiguous	[K].NLPIYSEEIVEmYK.[G]	M12(Oxidation)	1	1	P35579	P35579	0	2	1	0	1	1	872.43	1743.85	1743.85	0.59	0.00051	HCD (High Energy Collision Dissociation)	MS2	0	25	48.907	40553	MS201900090_4_PKA.raw	F4		53	48	41	0.00414583	0	4.51e-07	7075348	47.86
		FALSE	High	Mascot (A5)	Unambiguous	[K].NLPIYSEEIVEmYK.[G]	M12(Oxidation)	1	1	P35579	P35579	0	2	0.94	0	1	1	872.429	1743.85	1743.85	0.39	0.00034	HCD (High Energy Collision Dissociation)	MS2	0	25	47.9394	39474	MS201900090_4_PKA.raw	F4		100	48	41	7.99544e-08	0	3.415e-06	7075348	47.86
		FALSE	High	Mascot (A5)	Unambiguous	[K].NLPIYSEEIVEmYK.[G]	M12(Oxidation)	1	1	P35579	P35579	0	2	0.9412	0	1	1	872.429	1743.85	1743.85	-0.06	-5e-05	HCD (High Energy Collision Dissociation)	MS2	70.0323	25	52.4862	44504	MS201900090_4_PKA.raw	F4		34	48	41	0.322809	0	1.363e-07	1.64651e+06	52.31
		FALSE	High	Mascot (A5)	Unambiguous	[K].NLPIYSEEIVEmYK.[G]	M12(Oxidation)	1	1	P35579	P35579	0	2	1	0	1	1	872.429	1743.85	1743.85	-0.06	-5e-05	HCD (High Energy Collision Dissociation)	MS2	0	1.103	45.9161	37215	MS201900090_4_PKA.raw	F4		97	48	41	1.65938e-07	0	1.58e-05	401443040	45.77
		FALSE	High	Mascot (A5)	Unambiguous	[K].NLPIYSEEIVEmYK.[G]	M12(Oxidation)	1	1	P35579	P35579	0	2	1	0	1	1	872.429	1743.85	1743.85	-0.14	-0.00012	HCD (High Energy Collision Dissociation)	MS2	54.1493	25	45.4559	36702	MS201900090_4_PKA.raw	F4		60	48	41	0.000706907	0	2.94e-06	401443040	45.77
		FALSE	High	Mascot (A5)	Unambiguous	[K].NLPIYSEEIVEmYK.[G]	M12(Oxidation)	1	1	P35579	P35579	0	2	0.9811	0	1	1	872.427	1743.85	1743.85	-2.32	-0.00202	HCD (High Energy Collision Dissociation)	MS2	40.551	21.497	48.4205	39997	MS201900090_4_PKA.raw	F4		53	48	41	0.00405121	8.015e-05	3.933e-05	7075348	47.86
		FALSE	High	Mascot (A5)	Unambiguous	[K].NLPIYSEEIVEmYK.[G]	M12(Oxidation)	1	1	P35579	P35579	0	2	0.9375	0	1	1	872.427	1743.85	1743.85	-2.16	-0.00188	HCD (High Energy Collision Dissociation)	MS2	16.6611	25	47.4986	39018	MS201900090_4_PKA.raw	F4		64	48	41	0.000286577	8.015e-05	3.683e-05	7075348	47.86
		FALSE	High	Mascot (A5)	Unambiguous	[K].NLPIYSEEIVEmYK.[G]	M12(Oxidation)	1	1	P35579	P35579	0	2	1	0	1	1	872.428	1743.85	1743.85	-0.75	-0.00065	HCD (High Energy Collision Dissociation)	MS2	0	25	49.9748	41748	MS201900090_4_PKA.raw	F4		37	48	41	0.133179	8.015e-05	0.0004167	1.78087e+06	49.87
		FALSE	High	Mascot (A5)	Unambiguous	[K].NLPIYSEEIVEmYK.[G]	M12(Oxidation)	1	1	P35579	P35579	0	2	1	0	1	1	872.431	1743.85	1743.85	2.1	0.00183	HCD (High Energy Collision Dissociation)	MS2	39.8679	25	54.6847	46969	MS201900090_4_PKA.raw	F4		6	48	41	177.55	0.0001341	0.002417	458671	54.8
		FALSE	High	Mascot (A5)	Unambiguous	[K].NLPIYSEEIVEmYK.[G]	M12(Oxidation)	1	1	P35579	P35579	0	2	1	0	1	1	872.429	1743.85	1743.85	-0.37	-0.00032	HCD (High Energy Collision Dissociation)	MS2	87.4851	25	50.4352	42269	MS201900090_4_PKA.raw	F4		1	48	41	645.178	0.0001341	0.001489	1.29096e+06	50.42
		FALSE	High	Mascot (A5)	Unambiguous	[K].NLPIYSEEIVEmYK.[G]	M12(Oxidation)	1	1	P35579	P35579	0	2	1	0	1	1	872.433	1743.86	1743.85	4.24	0.00369	HCD (High Energy Collision Dissociation)	MS2	52.8373	25	61.2475	54084	MS201900090_4_PKA.raw	F4		17	48	41	15.6094	0.0004105	0.009553	190976	61.23
		FALSE	High	Mascot (A5)	Unambiguous	[K].NLPIYSEEIVEmYK.[G]	M12(Oxidation)	1	1	P35579	P35579	0	2	1	0	1	1	872.432	1743.86	1743.85	3.24	0.00283	HCD (High Energy Collision Dissociation)	MS2	38.2431	25	59.3219	51848	MS201900090_4_PKA.raw	F4		10	48	41	67.603	0.0007363	0.01075
		FALSE	High	Mascot (A5)	Unambiguous	[K].NLPIYSEEIVEmYK.[G]	M12(Oxidation)	1	1	P35579	P35579	0	2	1	0	1	1	872.428	1743.85	1743.85	-1.26	-0.0011	HCD (High Energy Collision Dissociation)	MS2	0	25	58.6356	51112	MS201900090_4_PKA.raw	F4		4	48	41	307.281	0.001768	0.04488	406112	58.67
		FALSE	High	Mascot (A5)	Unambiguous	[K].NLPIYSEEIVEmYK.[G]	M12(Oxidation)	1	1	P35579	P35579	0	2	1	0	1	1	872.435	1743.86	1743.85	6.95	0.00606	HCD (High Energy Collision Dissociation)	MS2	37.3807	25	71.5294	65969	MS201900090_4_PKA.raw	F4		5	48	41	242.341	0.003313	0.08088	162558	71.46
	FALSE	High	[K].NLPIYSEEIVEMYK.[G]			3.39758e-07	0	1	1	13	P35579	P35579 [126-139]	0	1727.86	0	100		High	High	0	1.375e-05	77	53.04	K.NLPIYSEEIVEMYK.G	[126-139]		Used
		Checked	Confidence	Identifying Node	PSM Ambiguity	Annotated Sequence	Modifications	# Protein Groups	# Proteins	Master Protein Accessions	Protein Accessions	# Missed Cleavages	Charge	DeltaScore	DeltaCn	Rank	Search Engine Rank	m/z [Da]	MH+ [Da]	Theo. MH+ [Da]	DeltaM [ppm]	Deltam/z [Da]	Activation Type	MS Order	Isolation Interference [%]	Ion Inject Time [ms]	RT [min]	First Scan	Spectrum File	File ID	Quan Info	Ions Score	Identity Strict	Identity Relaxed	Expectation Value	Percolator q-Value	Percolator PEP	Precursor Abundance	Apex RT [min]
		FALSE	High	Mascot (A5)	Unambiguous	[K].NLPIYSEEIVEMYK.[G]		1	1	P35579	P35579	0	2	0.9344	0	1	1	864.433	1727.86	1727.86	1.01	0.00087	HCD (High Energy Collision Dissociation)	MS2	3.079	25	54.7025	46989	MS201900090_4_PKA.raw	F4		61	48	41	0.000516623	0	1.445e-05	331485952	53.04
		FALSE	High	Mascot (A5)	Unambiguous	[K].NLPIYSEEIVEMYK.[G]		1	1	P35579	P35579	0	2	0.9481	0	1	1	864.433	1727.86	1727.86	0.99	0.00085	HCD (High Energy Collision Dissociation)	MS2	0	22.439	53.7381	45909	MS201900090_4_PKA.raw	F4		77	48	41	1.49339e-05	0	1.375e-05	331485952	53.04
		FALSE	High	Mascot (A5)	Unambiguous	[K].NLPIYSEEIVEMYK.[G]		1	1	P35579	P35579	0	2	0.6154	0	1	1	864.432	1727.86	1727.86	0.87	0.00075	HCD (High Energy Collision Dissociation)	MS2	0	25	56.9505	49253	MS201900090_4_PKA.raw	F4		26	48	41	1.69708	0	8.032e-06	906810	57.09
		FALSE	High	Mascot (A5)	Unambiguous	[K].NLPIYSEEIVEMYK.[G]		1	1	P35579	P35579	0	2	1	0	1	1	864.43	1727.85	1727.86	-1.4	-0.00121	HCD (High Energy Collision Dissociation)	MS2	0	25	54.2283	46464	MS201900090_4_PKA.raw	F4		59	48	41	0.000889426	0	4.389e-06	331485952	53.04
		FALSE	High	Mascot (A5)	Unambiguous	[K].NLPIYSEEIVEMYK.[G]		1	1	P35579	P35579	0	2	1	0	1	1	864.429	1727.85	1727.86	-3.01	-0.0026	HCD (High Energy Collision Dissociation)	MS2	16.4553	25	55.7242	48084	MS201900090_4_PKA.raw	F4		60	48	41	0.000736824	0	3.493e-06
		FALSE	High	Mascot (A5)	Unambiguous	[K].NLPIYSEEIVEMYK.[G]		1	1	P35579	P35579	0	2	0.9048	0	1	1	864.429	1727.85	1727.86	-3.15	-0.00272	HCD (High Energy Collision Dissociation)	MS2	0	25	55.2244	47557	MS201900090_4_PKA.raw	F4		63	48	41	0.000343223	0	9.732e-08	331485952	53.04
		FALSE	High	Mascot (A5)	Unambiguous	[K].NLPIYSEEIVEMYK.[G]		1	1	P35579	P35579	0	2	0.9459	0	1	1	864.433	1727.86	1727.86	1.17	0.00101	HCD (High Energy Collision Dissociation)	MS2	21.0946	25	52.7454	44793	MS201900090_4_PKA.raw	F4		74	48	41	3.00705e-05	0	1.769e-05	331485952	53.04
		FALSE	High	Mascot (A5)	Unambiguous	[K].NLPIYSEEIVEMYK.[G]		1	1	P35579	P35579	0	2	0.3333	0	1	1	864.431	1727.85	1727.86	-0.86	-0.00074	HCD (High Energy Collision Dissociation)	MS2	73.0457	25	63.9445	57204	MS201900090_4_PKA.raw	F4		12	48	41	39.635	8.015e-05	0.0005554
		FALSE	High	Mascot (A5)	Unambiguous	[K].NLPIYSEEIVEMYK.[G]		1	1	P35579	P35579	0	2	0.9324	0	1	1	864.433	1727.86	1727.86	1.96	0.0017	HCD (High Energy Collision Dissociation)	MS2	0.608453	1.902	53.202	45316	MS201900090_4_PKA.raw	F4		74	48	41	3.00375e-05	8.015e-05	3.584e-05	331485952	53.04
		FALSE	High	Mascot (A5)	Unambiguous	[K].NLPIYSEEIVEMYK.[G]		1	1	P35579	P35579	0	2	1	0	1	1	864.43	1727.85	1727.86	-2.32	-0.002	HCD (High Energy Collision Dissociation)	MS2	0	25	54.2349	46470	MS201900090_4_PKA.raw	F4		44	48	41	0.025248	8.015e-05	4.155e-05	331485952	53.04
		FALSE	High	Mascot (A5)	Unambiguous	[K].NLPIYSEEIVEMYK.[G]		1	1	P35579	P35579	0	2	0.9474	0	1	1	864.427	1727.85	1727.86	-5.2	-0.00449	HCD (High Energy Collision Dissociation)	MS2	23.608	25	56.4544	48744	MS201900090_4_PKA.raw	F4		19	48	41	8.88666	8.015e-05	0.0004685
		FALSE	High	Mascot (A5)	Unambiguous	[K].NLPIYSEEIVEMYK.[G]		1	1	P35579	P35579	0	2	1	0	1	1	864.43	1727.85	1727.86	-1.88	-0.00162	HCD (High Energy Collision Dissociation)	MS2	78.2938	25	62.5784	55600	MS201900090_4_PKA.raw	F4		5	48	41	207.239	0.0002495	0.00377
		FALSE	High	Mascot (A5)	Unambiguous	[K].NLPIYSEEIVEMYK.[G]		1	1	P35579	P35579	0	2	1	0	1	1	864.427	1727.85	1727.86	-4.91	-0.00424	HCD (High Energy Collision Dissociation)	MS2	84.8062	25	67.0354	60798	MS201900090_4_PKA.raw	F4		6	48	41	166.758	0.001153	0.0218
	FALSE	High	[K].NSFREQLEEEEEAKHNLEK.[Q]			1.0506e-05	0	1	1	1	P35579	P35579 [1339-1357]	2	2359.12	0		No Quan Values	High	High	0	3.978e-06	43		K.NSFREQLEEEEEAKHNLEK.Q	[1339-1357]		Not Used
		Checked	Confidence	Identifying Node	PSM Ambiguity	Annotated Sequence	Modifications	# Protein Groups	# Proteins	Master Protein Accessions	Protein Accessions	# Missed Cleavages	Charge	DeltaScore	DeltaCn	Rank	Search Engine Rank	m/z [Da]	MH+ [Da]	Theo. MH+ [Da]	DeltaM [ppm]	Deltam/z [Da]	Activation Type	MS Order	Isolation Interference [%]	Ion Inject Time [ms]	RT [min]	First Scan	Spectrum File	File ID	Quan Info	Ions Score	Identity Strict	Identity Relaxed	Expectation Value	Percolator q-Value	Percolator PEP	Precursor Abundance	Apex RT [min]
		FALSE	High	Mascot (A5)	Unambiguous	[K].NSFREQLEEEEEAKHNLEK.[Q]		1	1	P35579	P35579	2	3	0.9535	0	1	1	787.044	2359.12	2359.12	0.25	0.00019	HCD (High Energy Collision Dissociation)	MS2	55.8949	25	21.2877	10847	MS201900090_4_PKA.raw	F4		43	51	44	0.0615897	0	3.978e-06	912462	21.32
	FALSE	High	[K].RQLEEAEEEAQR.[A]			1.12729e-07	0	1	1	1	P35579	P35579 [1877-1888]	1	1487.71	0	100		High	High	0	2.949e-08	61	14.97	K.RQLEEAEEEAQR.A	[1877-1888]		Used
		Checked	Confidence	Identifying Node	PSM Ambiguity	Annotated Sequence	Modifications	# Protein Groups	# Proteins	Master Protein Accessions	Protein Accessions	# Missed Cleavages	Charge	DeltaScore	DeltaCn	Rank	Search Engine Rank	m/z [Da]	MH+ [Da]	Theo. MH+ [Da]	DeltaM [ppm]	Deltam/z [Da]	Activation Type	MS Order	Isolation Interference [%]	Ion Inject Time [ms]	RT [min]	First Scan	Spectrum File	File ID	Quan Info	Ions Score	Identity Strict	Identity Relaxed	Expectation Value	Percolator q-Value	Percolator PEP	Precursor Abundance	Apex RT [min]
		FALSE	High	Mascot (A5)	Unambiguous	[K].RQLEEAEEEAQR.[A]		1	1	P35579	P35579	1	2	0.75	0	1	1	744.359	1487.71	1487.71	1.77	0.00132	HCD (High Energy Collision Dissociation)	MS2	85.5561	25	14.9616	3950	MS201900090_4_PKA.raw	F4		61	47	40	0.000536622	0	2.949e-08	2.0965e+06	14.97
	FALSE	High	[R].NTDQASMPDNTAAQK.[V]	1xAcetyl [N-Term]	P35749 1xAcetyl [N-Term]; P35579 1xAcetyl [N-Term]	1.47541e-06	0	2	2	1	P35749; P35579	P35749 [366-380]; P35579 [359-373]	0	1633.71	0	100	Shared	High	High	0	4.753e-07	82	16.6	R.NTDQASMPDNTAAQK.V	[359-373]	1xAcetyl [N-Term]	Used
		Checked	Confidence	Identifying Node	PSM Ambiguity	Annotated Sequence	Modifications	# Protein Groups	# Proteins	Master Protein Accessions	Protein Accessions	# Missed Cleavages	Charge	DeltaScore	DeltaCn	Rank	Search Engine Rank	m/z [Da]	MH+ [Da]	Theo. MH+ [Da]	DeltaM [ppm]	Deltam/z [Da]	Activation Type	MS Order	Isolation Interference [%]	Ion Inject Time [ms]	RT [min]	First Scan	Spectrum File	File ID	Quan Info	Ions Score	Identity Strict	Identity Relaxed	Expectation Value	Percolator q-Value	Percolator PEP	Precursor Abundance	Apex RT [min]
		FALSE	High	Mascot (A5)	Unambiguous	[R].nTDQASMPDNTAAQK.[V]	N-Term(Acetyl)	2	2	P35749; P35579	P35749; P35579	0	2	1	0	1	1	817.357	1633.71	1633.71	-3.36	-0.00274	HCD (High Energy Collision Dissociation)	MS2	0	25	16.5878	5834	MS201900090_4_PKA.raw	F4		82	48	41	4.03797e-06	0	4.753e-07	4621616	16.6
	FALSE	High	[R].NTDQASMPDNTAAQK.[V]			1.46422e-06	0	2	2	1	P35749; P35579	P35749 [366-380]; P35579 [359-373]	0	1591.7	0	100	Shared	High	High	0	4.739e-07	83	15.18	R.NTDQASMPDNTAAQK.V	[359-373]		Used
		Checked	Confidence	Identifying Node	PSM Ambiguity	Annotated Sequence	Modifications	# Protein Groups	# Proteins	Master Protein Accessions	Protein Accessions	# Missed Cleavages	Charge	DeltaScore	DeltaCn	Rank	Search Engine Rank	m/z [Da]	MH+ [Da]	Theo. MH+ [Da]	DeltaM [ppm]	Deltam/z [Da]	Activation Type	MS Order	Isolation Interference [%]	Ion Inject Time [ms]	RT [min]	First Scan	Spectrum File	File ID	Quan Info	Ions Score	Identity Strict	Identity Relaxed	Expectation Value	Percolator q-Value	Percolator PEP	Precursor Abundance	Apex RT [min]
		FALSE	High	Mascot (A5)	Unambiguous	[R].NTDQASMPDNTAAQK.[V]		2	2	P35749; P35579	P35749; P35579	0	2	0.988	0	1	1	796.35	1591.69	1591.7	-5.12	-0.00408	HCD (High Energy Collision Dissociation)	MS2	81.097	25	15.141	4160	MS201900090_4_PKA.raw	F4		83	47	40	3.00511e-06	0	4.739e-07	20038214	15.18
	FALSE	High	[R].TEMEDLMSSKDDVGK.[S]	2xOxidation [M3; M7]		1.35045e-05	0	1	1	3	P35579	P35579 [1504-1518]	1	1716.73	0	100		High	High	0	5.216e-06	84	15.02	R.TEMEDLMSSKDDVGK.S	[1504-1518]		Used
		Checked	Confidence	Identifying Node	PSM Ambiguity	Annotated Sequence	Modifications	# Protein Groups	# Proteins	Master Protein Accessions	Protein Accessions	# Missed Cleavages	Charge	DeltaScore	DeltaCn	Rank	Search Engine Rank	m/z [Da]	MH+ [Da]	Theo. MH+ [Da]	DeltaM [ppm]	Deltam/z [Da]	Activation Type	MS Order	Isolation Interference [%]	Ion Inject Time [ms]	RT [min]	First Scan	Spectrum File	File ID	Quan Info	Ions Score	Identity Strict	Identity Relaxed	Expectation Value	Percolator q-Value	Percolator PEP	Precursor Abundance	Apex RT [min]
		FALSE	High	Mascot (A5)	Unambiguous	[R].TEmEDLmSSKDDVGK.[S]	M3(Oxidation); M7(Oxidation)	1	1	P35579	P35579	1	2	0.9048	0	1	1	858.872	1716.74	1716.73	3.21	0.00276	HCD (High Energy Collision Dissociation)	MS2	0	25	15.9098	5046	MS201900090_4_PKA.raw	F4		84	48	41	2.42893e-06	0	5.216e-06	3.26187e+06	15.7
		FALSE	High	Mascot (A5)	Unambiguous	[R].TEmEDLmSSKDDVGK.[S]	M3(Oxidation); M7(Oxidation)	1	1	P35579	P35579	1	2	0.9074	0	1	1	858.867	1716.73	1716.73	-2.04	-0.00175	HCD (High Energy Collision Dissociation)	MS2	52.8699	25	15.3763	4445	MS201900090_4_PKA.raw	F4		54	48	41	0.00255242	0	1.032e-05	266022656	15.02
		FALSE	High	Mascot (A5)	Unambiguous	[R].TEmEDLmSSKDDVGK.[S]	M3(Oxidation); M7(Oxidation)	1	1	P35579	P35579	1	2	0.7727	0	1	1	858.867	1716.73	1716.73	-2.26	-0.00194	HCD (High Energy Collision Dissociation)	MS2	0	25	14.8697	3840	MS201900090_4_PKA.raw	F4		44	48	41	0.0246933	8.015e-05	0.0007748	266022656	15.02
	FALSE	High	[K].RQLEEAEEEAQR.[A]	1xAcetyl [N-Term]	P35579 1xAcetyl [N-Term]	7.25076e-08	0	1	1	2	P35579	P35579 [1877-1888]	1	1529.72	0	100		High	High	0	1.828e-08	42	18.11	K.RQLEEAEEEAQR.A	[1877-1888]	1xAcetyl [N-Term]	Used
		Checked	Confidence	Identifying Node	PSM Ambiguity	Annotated Sequence	Modifications	# Protein Groups	# Proteins	Master Protein Accessions	Protein Accessions	# Missed Cleavages	Charge	DeltaScore	DeltaCn	Rank	Search Engine Rank	m/z [Da]	MH+ [Da]	Theo. MH+ [Da]	DeltaM [ppm]	Deltam/z [Da]	Activation Type	MS Order	Isolation Interference [%]	Ion Inject Time [ms]	RT [min]	First Scan	Spectrum File	File ID	Quan Info	Ions Score	Identity Strict	Identity Relaxed	Expectation Value	Percolator q-Value	Percolator PEP	Precursor Abundance	Apex RT [min]
		FALSE	High	Mascot (A5)	Unambiguous	[K].rQLEEAEEEAQR.[A]	N-Term(Acetyl)	1	1	P35579	P35579	1	2	0.9737	0	1	1	765.365	1529.72	1529.72	2.96	0.00226	HCD (High Energy Collision Dissociation)	MS2	0	25	17.2165	6474	MS201900090_4_PKA.raw	F4		38	47	40	0.0891547	0	2.544e-07
		FALSE	High	Mascot (A5)	Unambiguous	[K].rQLEEAEEEAQR.[A]	N-Term(Acetyl)	1	1	P35579	P35579	1	2	0.9762	0	1	1	765.364	1529.72	1529.72	1.37	0.00105	HCD (High Energy Collision Dissociation)	MS2	22.3195	25	18.0516	7391	MS201900090_4_PKA.raw	F4		42	48	41	0.0385649	0	1.828e-08	3241743	18.11
	FALSE	High	[R].TEMEDLMSSKDDVGK.[S]			5.65669e-07	0	1	1	5	P35579	P35579 [1504-1518]	1	1684.74	0	100		High	High	0	1.69e-07	88	25.17	R.TEMEDLMSSKDDVGK.S	[1504-1518]		Used
		Checked	Confidence	Identifying Node	PSM Ambiguity	Annotated Sequence	Modifications	# Protein Groups	# Proteins	Master Protein Accessions	Protein Accessions	# Missed Cleavages	Charge	DeltaScore	DeltaCn	Rank	Search Engine Rank	m/z [Da]	MH+ [Da]	Theo. MH+ [Da]	DeltaM [ppm]	Deltam/z [Da]	Activation Type	MS Order	Isolation Interference [%]	Ion Inject Time [ms]	RT [min]	First Scan	Spectrum File	File ID	Quan Info	Ions Score	Identity Strict	Identity Relaxed	Expectation Value	Percolator q-Value	Percolator PEP	Precursor Abundance	Apex RT [min]
		FALSE	High	Mascot (A5)	Unambiguous	[R].TEMEDLMSSKDDVGK.[S]		1	1	P35579	P35579	1	2	0.9595	0	1	1	842.873	1684.74	1684.74	-1.13	-0.00095	HCD (High Energy Collision Dissociation)	MS2	0	9.754	25.3451	14995	MS201900090_4_PKA.raw	F4		74	48	41	3.06736e-05	0	1.081e-05	111630304	25.17
		FALSE	High	Mascot (A5)	Unambiguous	[R].TEMEDLMSSKDDVGK.[S]		1	1	P35579	P35579	1	2	1	0	1	1	842.872	1684.74	1684.74	-2.34	-0.00197	HCD (High Energy Collision Dissociation)	MS2	55.4907	25	24.148	13960	MS201900090_4_PKA.raw	F4		88	48	41	1.03005e-06	0	1.69e-07	1.79289e+06	24.18
		FALSE	High	Mascot (A5)	Unambiguous	[R].TEMEDLMSSKDDVGK.[S]		1	1	P35579	P35579	1	2	1	0	1	1	842.871	1684.73	1684.74	-3.81	-0.00321	HCD (High Energy Collision Dissociation)	MS2	69.0841	25	25.8498	15465	MS201900090_4_PKA.raw	F4		20	48	41	7.46211	8.015e-05	0.0003627	111630304	25.17
		FALSE	High	Mascot (A5)	Unambiguous	[R].TEMEDLMSSKDDVGK.[S]		1	1	P35579	P35579	1	3	1	0	1	1	562.254	1684.75	1684.74	3.81	0.00214	HCD (High Energy Collision Dissociation)	MS2	0	25	24.2353	14051	MS201900090_4_PKA.raw	F4		32	48	41	0.428156	8.015e-05	0.0007271
		FALSE	High	Mascot (A5)	Unambiguous	[R].TEMEDLMSSKDDVGK.[S]		1	1	P35579	P35579	1	3	0.1667	0	1	1	562.252	1684.74	1684.74	0.97	0.00054	HCD (High Energy Collision Dissociation)	MS2	41.319	25	24.9232	14648	MS201900090_4_PKA.raw	F4		6	48	41	167.147	0.0002005	0.00303	46071024	25.17
	FALSE	High	[K].TELEDTLDSTAAQQELR.[S]			1.45191e-09	0	1	1	1	P35579	P35579 [1146-1162]	0	1919.92	0	100		High	High	0	2.667e-10	112	37.06	K.TELEDTLDSTAAQQELR.S	[1146-1162]		Used
		Checked	Confidence	Identifying Node	PSM Ambiguity	Annotated Sequence	Modifications	# Protein Groups	# Proteins	Master Protein Accessions	Protein Accessions	# Missed Cleavages	Charge	DeltaScore	DeltaCn	Rank	Search Engine Rank	m/z [Da]	MH+ [Da]	Theo. MH+ [Da]	DeltaM [ppm]	Deltam/z [Da]	Activation Type	MS Order	Isolation Interference [%]	Ion Inject Time [ms]	RT [min]	First Scan	Spectrum File	File ID	Quan Info	Ions Score	Identity Strict	Identity Relaxed	Expectation Value	Percolator q-Value	Percolator PEP	Precursor Abundance	Apex RT [min]
		FALSE	High	Mascot (A5)	Unambiguous	[K].TELEDTLDSTAAQQELR.[S]		1	1	P35579	P35579	0	2	0.9196	0	1	1	960.461	1919.92	1919.92	-1.92	-0.00185	HCD (High Energy Collision Dissociation)	MS2	0	25	36.9177	27248	MS201900090_4_PKA.raw	F4		112	50	43	6.72148e-09	0	2.667e-10	14721464	37.06
	FALSE	High	[R].SMMQDREDQSILCTGESGAGK.[T]	1xPhospho [S1]; 2xOxidation [M2; M3]	P35579 1xPhospho [S160]	1.8032e-05	0	1	1	1	P35579	P35579 [160-180]	1	2354.93	0	100		High	High	0	7.169e-06	20	23.12	R.SMMQDREDQSILCTGESGAGK.T	[160-180]	1xPhospho [S160]	Used
		Checked	Confidence	Identifying Node	PSM Ambiguity	Annotated Sequence	Modifications	# Protein Groups	# Proteins	Master Protein Accessions	Protein Accessions	# Missed Cleavages	Charge	DeltaScore	DeltaCn	Rank	Search Engine Rank	m/z [Da]	MH+ [Da]	Theo. MH+ [Da]	DeltaM [ppm]	Deltam/z [Da]	Activation Type	MS Order	Isolation Interference [%]	Ion Inject Time [ms]	RT [min]	First Scan	Spectrum File	File ID	Quan Info	Ions Score	Identity Strict	Identity Relaxed	Expectation Value	Percolator q-Value	Percolator PEP	Precursor Abundance	Apex RT [min]
		FALSE	High	Mascot (A5)	Unambiguous	[R].smmQDREDQSILCTGESGAGK.[T]	S1(Phospho); M2(Oxidation); M3(Oxidation)	1	1	P35579	P35579	1	2	0.35	0	1	1	1177.97	2354.93	2354.93	-0.99	-0.00116	HCD (High Energy Collision Dissociation)	MS2	27.7889	25	23.0888	12887	MS201900090_4_PKA.raw	F4		20	49	42	9.63333	0	7.169e-06	1.99198e+06	23.12
	FALSE	High	[R].SMMQDREDQSILCTGESGAGK.[T]	1xPhospho [S1]; 1xOxidation [M]	P35579 1xPhospho [S160]	5.86413e-05	0	1	1	2	P35579	P35579 [160-180]	1	2338.93	0	100		High	High	0	2.558e-05	44	26.12	R.SMMQDREDQSILCTGESGAGK.T	[160-180]	1xPhospho [S160]	Used
		Checked	Confidence	Identifying Node	PSM Ambiguity	Annotated Sequence	Modifications	# Protein Groups	# Proteins	Master Protein Accessions	Protein Accessions	# Missed Cleavages	Charge	DeltaScore	DeltaCn	Rank	Search Engine Rank	m/z [Da]	MH+ [Da]	Theo. MH+ [Da]	DeltaM [ppm]	Deltam/z [Da]	Activation Type	MS Order	Isolation Interference [%]	Ion Inject Time [ms]	RT [min]	First Scan	Spectrum File	File ID	Quan Info	Ions Score	Identity Strict	Identity Relaxed	Expectation Value	Percolator q-Value	Percolator PEP	Precursor Abundance	Apex RT [min]
		FALSE	High	Mascot (A5)	Unambiguous	[R].sMmQDREDQSILCTGESGAGK.[T]	S1(Phospho); M3(Oxidation)	1	1	P35579	P35579	1	2	0.0682	0	1	1	1169.97	2338.93	2338.93	-3.44	-0.00403	HCD (High Energy Collision Dissociation)	MS2	0	25	26.1421	15802	MS201900090_4_PKA.raw	F4		44	50	43	0.0407496	0	2.558e-05	755002	26.12
		FALSE	High	Mascot (A5)	Unambiguous	[R].smMQDREDQSILCTGESGAGK.[T]	S1(Phospho); M2(Oxidation)	1	1	P35579	P35579	1	2	0.0682	0	1	2	1169.97	2338.93	2338.93	-3.44	-0.00403	HCD (High Energy Collision Dissociation)	MS2	0	25	26.1421	15802	MS201900090_4_PKA.raw	F4		44	50	43	0.0407496	0	2.558e-05	755002	26.12
	FALSE	High	[K].SMEAEMIQLQEELAAAER.[A]	1xAcetyl [N-Term]; 1xOxidation [M]	P35579 1xAcetyl [N-Term]	1.26965e-08	0	1	1	9	P35579	P35579 [1677-1694]	0	2106.97	1	100		High	High	0	3.648e-08	91	59.83	K.SMEAEMIQLQEELAAAER.A	[1677-1694]	1xAcetyl [N-Term]	Used
		Checked	Confidence	Identifying Node	PSM Ambiguity	Annotated Sequence	Modifications	# Protein Groups	# Proteins	Master Protein Accessions	Protein Accessions	# Missed Cleavages	Charge	DeltaScore	DeltaCn	Rank	Search Engine Rank	m/z [Da]	MH+ [Da]	Theo. MH+ [Da]	DeltaM [ppm]	Deltam/z [Da]	Activation Type	MS Order	Isolation Interference [%]	Ion Inject Time [ms]	RT [min]	First Scan	Spectrum File	File ID	Quan Info	Ions Score	Identity Strict	Identity Relaxed	Expectation Value	Percolator q-Value	Percolator PEP	Precursor Abundance	Apex RT [min]
		FALSE	High	Mascot (A5)	Unambiguous	[K].smEAEMIQLQEELAAAER.[A]	N-Term(Acetyl); M2(Oxidation)	1	1	P35579	P35579	0	2	0.375	0	1	1	1053.99	2106.96	2106.97	-1.8	-0.0019	HCD (High Energy Collision Dissociation)	MS2	0	25	64.8671	58264	MS201900090_4_PKA.raw	F4		88	50	43	1.76745e-06	0	3.009e-08	1.41808e+06	64.81
		FALSE	High	Mascot (A5)	Unambiguous	[K].smEAEMIQLQEELAAAER.[A]	N-Term(Acetyl); M2(Oxidation)	1	1	P35579	P35579	0	2	0.4713	0	1	1	1053.99	2106.97	2106.97	0.19	0.0002	HCD (High Energy Collision Dissociation)	MS2	0	25	64.6854	58073	MS201900090_4_PKA.raw	F4		87	50	43	2.4409e-06	0	2.777e-09	1.41808e+06	64.81
		FALSE	High	Mascot (A5)	Unambiguous	[K].smEAEMIQLQEELAAAER.[A]	N-Term(Acetyl); M2(Oxidation)	1	1	P35579	P35579	0	2	0.3956	0	1	1	1053.99	2106.97	2106.97	1.52	0.0016	HCD (High Energy Collision Dissociation)	MS2	16.0007	25	65.3763	58853	MS201900090_4_PKA.raw	F4		91	50	43	1.05291e-06	0	3.648e-08	1.41808e+06	64.81
		FALSE	High	Mascot (A5)	Unambiguous	[K].sMEAEmIQLQEELAAAER.[A]	N-Term(Acetyl); M6(Oxidation)	1	1	P35579	P35579	0	2	0.3472	0	1	1	1053.99	2106.97	2106.97	2.63	0.00277	HCD (High Energy Collision Dissociation)	MS2	0	25	59.8486	52466	MS201900090_4_PKA.raw	F4		72	50	43	7.5549e-05	0	3.738e-08	1.54217e+06	59.83
		FALSE	High	Mascot (A5)	Unambiguous	[K].sMEAEmIQLQEELAAAER.[A]	N-Term(Acetyl); M6(Oxidation)	1	1	P35579	P35579	0	2	1	0	1	1	1053.99	2106.98	2106.97	3.42	0.0036	HCD (High Energy Collision Dissociation)	MS2	69.0266	25	66.5147	60186	MS201900090_4_PKA.raw	F4		21	50	43	8.78411	0	2.016e-05
		FALSE	High	Mascot (A5)	Unambiguous	[K].smEAEMIQLQEELAAAER.[A]	N-Term(Acetyl); M2(Oxidation)	1	1	P35579	P35579	0	2	1	0	1	2	1053.99	2106.98	2106.97	3.42	0.0036	HCD (High Energy Collision Dissociation)	MS2	69.0266	25	66.5147	60186	MS201900090_4_PKA.raw	F4		21	50	43	8.78411	0	2.016e-05
		FALSE	High	Mascot (A5)	Unambiguous	[K].sMEAEmIQLQEELAAAER.[A]	N-Term(Acetyl); M6(Oxidation)	1	1	P35579	P35579	0	3	0.1154	0	1	1	702.992	2106.96	2106.97	-2.52	-0.00177	HCD (High Energy Collision Dissociation)	MS2	65.3828	25	49.6554	41417	MS201900090_4_PKA.raw	F4		26	50	43	3.0575	8.015e-05	0.0003822
		FALSE	High	Mascot (A5)	Unambiguous	[K].smEAEMIQLQEELAAAER.[A]	N-Term(Acetyl); M2(Oxidation)	1	1	P35579	P35579	0	2	1	0	1	2	1053.99	2106.96	2106.97	-1.88	-0.00198	HCD (High Energy Collision Dissociation)	MS2	81.1462	25	65.9009	59468	MS201900090_4_PKA.raw	F4		14	50	43	53.9459	0.0002495	0.003511	1.41808e+06	64.81
		FALSE	High	Mascot (A5)	Unambiguous	[K].sMEAEmIQLQEELAAAER.[A]	N-Term(Acetyl); M6(Oxidation)	1	1	P35579	P35579	0	2	1	0	1	1	1053.99	2106.96	2106.97	-1.88	-0.00198	HCD (High Energy Collision Dissociation)	MS2	81.1462	25	65.9009	59468	MS201900090_4_PKA.raw	F4		14	50	43	53.9459	0.0007363	0.01206	1.41808e+06	64.81
	FALSE	High	[K].SMEAEMIQLQEELAAAER.[A]	1xAcetyl [N-Term]	P35579 1xAcetyl [N-Term]	3.46625e-08	0	1	1	3	P35579	P35579 [1677-1694]	0	2090.97	0	100		High	High	0	8.255e-09	95	60.25	K.SMEAEMIQLQEELAAAER.A	[1677-1694]	1xAcetyl [N-Term]	Used
		Checked	Confidence	Identifying Node	PSM Ambiguity	Annotated Sequence	Modifications	# Protein Groups	# Proteins	Master Protein Accessions	Protein Accessions	# Missed Cleavages	Charge	DeltaScore	DeltaCn	Rank	Search Engine Rank	m/z [Da]	MH+ [Da]	Theo. MH+ [Da]	DeltaM [ppm]	Deltam/z [Da]	Activation Type	MS Order	Isolation Interference [%]	Ion Inject Time [ms]	RT [min]	First Scan	Spectrum File	File ID	Quan Info	Ions Score	Identity Strict	Identity Relaxed	Expectation Value	Percolator q-Value	Percolator PEP	Precursor Abundance	Apex RT [min]
		FALSE	High	Mascot (A5)	Unambiguous	[K].sMEAEMIQLQEELAAAER.[A]	N-Term(Acetyl)	1	1	P35579	P35579	0	2	0.8947	0	1	1	1045.99	2090.98	2090.97	1.59	0.00167	HCD (High Energy Collision Dissociation)	MS2	41.8552	25	64.884	58283	MS201900090_4_PKA.raw	F4		95	50	43	4.06181e-07	0	8.255e-09
		FALSE	High	Mascot (A5)	Unambiguous	[K].sMEAEMIQLQEELAAAER.[A]	N-Term(Acetyl)	1	1	P35579	P35579	0	3	0.9467	0	1	1	697.663	2090.97	2090.97	0.59	0.00041	HCD (High Energy Collision Dissociation)	MS2	67.9283	25	72.2526	66784	MS201900090_4_PKA.raw	F4		75	50	43	3.64253e-05	0	2.576e-07	822109	72.29
		FALSE	High	Mascot (A5)	Unambiguous	[K].sMEAEMIQLQEELAAAER.[A]	N-Term(Acetyl)	1	1	P35579	P35579	0	3	1	0	1	1	697.664	2090.98	2090.97	2.36	0.00165	HCD (High Energy Collision Dissociation)	MS2	77.0898	25	59.9445	52577	MS201900090_4_PKA.raw	F4		4	50	43	531.25	0.001768	0.04627	14780193	60.25
	FALSE	High	[K].SMEAEMIQLQEELAAAER.[A]	2xOxidation [M2; M6]		2.23391e-10	0	1	1	39	P35579	P35579 [1677-1694]	0	2080.95	0	100		High	High	0	8.082e-09	144	41.5	K.SMEAEMIQLQEELAAAER.A	[1677-1694]		Used
		Checked	Confidence	Identifying Node	PSM Ambiguity	Annotated Sequence	Modifications	# Protein Groups	# Proteins	Master Protein Accessions	Protein Accessions	# Missed Cleavages	Charge	DeltaScore	DeltaCn	Rank	Search Engine Rank	m/z [Da]	MH+ [Da]	Theo. MH+ [Da]	DeltaM [ppm]	Deltam/z [Da]	Activation Type	MS Order	Isolation Interference [%]	Ion Inject Time [ms]	RT [min]	First Scan	Spectrum File	File ID	Quan Info	Ions Score	Identity Strict	Identity Relaxed	Expectation Value	Percolator q-Value	Percolator PEP	Precursor Abundance	Apex RT [min]
		FALSE	High	Mascot (A5)	Unambiguous	[K].SmEAEmIQLQEELAAAER.[A]	M2(Oxidation); M6(Oxidation)	1	1	P35579	P35579	0	2	0.9043	0	1	1	1040.98	2080.95	2080.95	0.17	0.00018	HCD (High Energy Collision Dissociation)	MS2	2.00279	13.962	42.2406	33277	MS201900090_4_PKA.raw	F4		115	50	43	3.89925e-09	0	9.358e-11	82116960	41.5
		FALSE	High	Mascot (A5)	Unambiguous	[K].SmEAEmIQLQEELAAAER.[A]	M2(Oxidation); M6(Oxidation)	1	1	P35579	P35579	0	2	0.9583	0	1	1	1040.98	2080.95	2080.95	0.22	0.00023	HCD (High Energy Collision Dissociation)	MS2	19.0007	25	53.2639	45375	MS201900090_4_PKA.raw	F4	Not Reliable	72	50	43	7.75805e-05	0	1.554e-08
		FALSE	High	Mascot (A5)	Unambiguous	[K].SmEAEmIQLQEELAAAER.[A]	M2(Oxidation); M6(Oxidation)	1	1	P35579	P35579	0	2	0.8434	0	1	1	1040.98	2080.95	2080.95	0.25	0.00026	HCD (High Energy Collision Dissociation)	MS2	0	25	56.9498	49252	MS201900090_4_PKA.raw	F4		83	50	43	5.37939e-06	0	3.233e-07
		FALSE	High	Mascot (A5)	Unambiguous	[K].SmEAEmIQLQEELAAAER.[A]	M2(Oxidation); M6(Oxidation)	1	1	P35579	P35579	0	2	0.8679	0	1	1	1040.98	2080.95	2080.95	0.32	0.00033	HCD (High Energy Collision Dissociation)	MS2	6.66843	25	48.4246	40002	MS201900090_4_PKA.raw	F4		106	50	43	2.83244e-08	0	3.802e-10	1.96552e+06	48.34
		FALSE	High	Mascot (A5)	Unambiguous	[K].SmEAEmIQLQEELAAAER.[A]	M2(Oxidation); M6(Oxidation)	1	1	P35579	P35579	0	2	0.8585	0	1	1	1040.98	2080.95	2080.95	0.41	0.00043	HCD (High Energy Collision Dissociation)	MS2	0	25	47.9442	39478	MS201900090_4_PKA.raw	F4		106	50	43	2.54636e-08	0	1.69e-08	1.96552e+06	48.34
		FALSE	High	Mascot (A5)	Unambiguous	[K].SmEAEmIQLQEELAAAER.[A]	M2(Oxidation); M6(Oxidation)	1	1	P35579	P35579	0	3	0.8415	0	1	1	694.323	2080.95	2080.95	0.79	0.00055	HCD (High Energy Collision Dissociation)	MS2	0	25	46.2617	37605	MS201900090_4_PKA.raw	F4		82	50	43	6.71907e-06	0	1.25e-06	1.3655e+06	45.71
		FALSE	High	Mascot (A5)	Unambiguous	[K].SmEAEmIQLQEELAAAER.[A]	M2(Oxidation); M6(Oxidation)	1	1	P35579	P35579	0	2	0.9714	0	1	1	1040.98	2080.96	2080.95	1.8	0.00187	HCD (High Energy Collision Dissociation)	MS2	16.2755	25	51.6438	43611	MS201900090_4_PKA.raw	F4		105	50	43	3.37957e-08	0	1.525e-07
		FALSE	High	Mascot (A5)	Unambiguous	[K].SmEAEmIQLQEELAAAER.[A]	M2(Oxidation); M6(Oxidation)	1	1	P35579	P35579	0	2	0.9512	0	1	1	1040.98	2080.96	2080.95	2.34	0.00243	HCD (High Energy Collision Dissociation)	MS2	26.3172	25	53.4038	45531	MS201900090_4_PKA.raw	F4		82	50	43	7.51755e-06	0	1.17e-07	1.24472e+06	52.85
		FALSE	High	Mascot (A5)	Unambiguous	[K].SmEAEmIQLQEELAAAER.[A]	M2(Oxidation); M6(Oxidation)	1	1	P35579	P35579	0	2	0.8957	0	1	1	1040.98	2080.96	2080.95	2.48	0.00258	HCD (High Energy Collision Dissociation)	MS2	55.0039	25	42.7472	33851	MS201900090_4_PKA.raw	F4		115	50	43	3.47732e-09	0	4.186e-10	22918348	42.27
		FALSE	High	Mascot (A5)	Unambiguous	[K].SmEAEmIQLQEELAAAER.[A]	M2(Oxidation); M6(Oxidation)	1	1	P35579	P35579	0	3	0.8	0	1	1	694.324	2080.96	2080.95	2.73	0.00189	HCD (High Energy Collision Dissociation)	MS2		25	49.5544	41296	MS201900090_4_PKA.raw	F4	Not Reliable	45	50	43	0.0340535	0	2.483e-05
		FALSE	High	Mascot (A5)	Unambiguous	[K].SmEAEmIQLQEELAAAER.[A]	M2(Oxidation); M6(Oxidation)	1	1	P35579	P35579	0	2	0.9683	0	1	1	1040.99	2080.96	2080.95	5.61	0.00583	HCD (High Energy Collision Dissociation)	MS2	82.3853	25	72.2053	66727	MS201900090_4_PKA.raw	F4		63	50	43	0.000585927	0	8.607e-07
		FALSE	High	Mascot (A5)	Unambiguous	[K].SmEAEmIQLQEELAAAER.[A]	M2(Oxidation); M6(Oxidation)	1	1	P35579	P35579	0	2	0.9058	0	1	1	1040.99	2080.97	2080.95	6.6	0.00686	HCD (High Energy Collision Dissociation)	MS2	2.0715	25	41.3469	32314	MS201900090_4_PKA.raw	F4		138	50	43	1.60419e-11	0	7.638e-10	82116960	41.5
		FALSE	High	Mascot (A5)	Unambiguous	[K].SmEAEmIQLQEELAAAER.[A]	M2(Oxidation); M6(Oxidation)	1	1	P35579	P35579	0	2	1	0	1	1	1040.98	2080.96	2080.95	1.54	0.00161	HCD (High Energy Collision Dissociation)	MS2	0	25	54.5068	46773	MS201900090_4_PKA.raw	F4		42	50	43	0.0681947	0	2.401e-06
		FALSE	High	Mascot (A5)	Unambiguous	[K].SmEAEmIQLQEELAAAER.[A]	M2(Oxidation); M6(Oxidation)	1	1	P35579	P35579	0	2	0.8649	0	1	1	1040.98	2080.95	2080.95	0.12	0.00013	HCD (High Energy Collision Dissociation)	MS2	64.3254	25	57.5508	49892	MS201900090_4_PKA.raw	F4		111	50	43	9.61655e-09	0	8.673e-07
		FALSE	High	Mascot (A5)	Unambiguous	[K].SmEAEmIQLQEELAAAER.[A]	M2(Oxidation); M6(Oxidation)	1	1	P35579	P35579	0	2	0.9832	0	1	1	1040.98	2080.95	2080.95	0.07	7e-05	HCD (High Energy Collision Dissociation)	MS2	0	25	45.2534	36493	MS201900090_4_PKA.raw	F4		119	50	43	1.43162e-09	0	1.533e-10
		FALSE	High	Mascot (A5)	Unambiguous	[K].SmEAEmIQLQEELAAAER.[A]	M2(Oxidation); M6(Oxidation)	1	1	P35579	P35579	0	2	0.9811	0	1	1	1040.97	2080.94	2080.95	-6.3	-0.00656	HCD (High Energy Collision Dissociation)	MS2	0	25	47.5025	39023	MS201900090_4_PKA.raw	F4		106	50	43	2.95775e-08	0	1.62e-07
		FALSE	High	Mascot (A5)	Unambiguous	[K].SmEAEmIQLQEELAAAER.[A]	M2(Oxidation); M6(Oxidation)	1	1	P35579	P35579	0	2	0.9773	0	1	1	1040.98	2080.94	2080.95	-4.04	-0.0042	HCD (High Energy Collision Dissociation)	MS2	0	25	50.0196	41801	MS201900090_4_PKA.raw	F4	Not Reliable	88	50	43	1.91457e-06	0	1.341e-07
		FALSE	High	Mascot (A5)	Unambiguous	[K].SmEAEmIQLQEELAAAER.[A]	M2(Oxidation); M6(Oxidation)	1	1	P35579	P35579	0	2	0.913	0	1	1	1040.98	2080.94	2080.95	-3.72	-0.00387	HCD (High Energy Collision Dissociation)	MS2	66.4336	25	71.3994	65846	MS201900090_4_PKA.raw	F4		69	50	43	0.000131052	0	1.95e-07
		FALSE	High	Mascot (A5)	Unambiguous	[K].SmEAEmIQLQEELAAAER.[A]	M2(Oxidation); M6(Oxidation)	1	1	P35579	P35579	0	3	0.82	0	1	1	694.321	2080.95	2080.95	-2.41	-0.00167	HCD (High Energy Collision Dissociation)	MS2	29.3434	25	44.664	36011	MS201900090_4_PKA.raw	F4		50	50	43	0.0126342	0	2.171e-06
		FALSE	High	Mascot (A5)	Unambiguous	[K].SmEAEmIQLQEELAAAER.[A]	M2(Oxidation); M6(Oxidation)	1	1	P35579	P35579	0	2	0.8026	0	1	1	1040.98	2080.95	2080.95	-2.16	-0.00225	HCD (High Energy Collision Dissociation)	MS2	14.565	25	61.1414	53960	MS201900090_4_PKA.raw	F4		76	50	43	2.59475e-05	0	2.321e-06
		FALSE	High	Mascot (A5)	Unambiguous	[K].SmEAEmIQLQEELAAAER.[A]	M2(Oxidation); M6(Oxidation)	1	1	P35579	P35579	0	2	0.8835	0	1	1	1040.97	2080.94	2080.95	-6.62	-0.00689	HCD (High Energy Collision Dissociation)	MS2	18.5261	25	44.8858	36245	MS201900090_4_PKA.raw	F4		103	50	43	6.24656e-08	0	2.851e-08	5845111	44.32
		FALSE	High	Mascot (A5)	Unambiguous	[K].SmEAEmIQLQEELAAAER.[A]	M2(Oxidation); M6(Oxidation)	1	1	P35579	P35579	0	2	0.8889	0	1	1	1040.98	2080.95	2080.95	-2.14	-0.00223	HCD (High Energy Collision Dissociation)	MS2	15.4433	23.731	43.6903	34946	MS201900090_4_PKA.raw	F4		99	50	43	1.51738e-07	0	1.267e-09	8801346	43.66
		FALSE	High	Mascot (A5)	Unambiguous	[K].SmEAEmIQLQEELAAAER.[A]	M2(Oxidation); M6(Oxidation)	1	1	P35579	P35579	0	2	0.9028	0	1	1	1040.98	2080.95	2080.95	-1.84	-0.00191	HCD (High Energy Collision Dissociation)	MS2	29.0831	25	41.2199	32156	MS201900090_4_PKA.raw	F4		144	50	43	4.72031e-12	0	8.082e-09	82116960	41.5
		FALSE	High	Mascot (A5)	Unambiguous	[K].SmEAEmIQLQEELAAAER.[A]	M2(Oxidation); M6(Oxidation)	1	1	P35579	P35579	0	2	0.9802	0	1	1	1040.98	2080.95	2080.95	-1.79	-0.00186	HCD (High Energy Collision Dissociation)	MS2	7.87959	25	46.0854	37402	MS201900090_4_PKA.raw	F4		101	50	43	8.48022e-08	0	3.537e-09
		FALSE	High	Mascot (A5)	Unambiguous	[K].SmEAEmIQLQEELAAAER.[A]	M2(Oxidation); M6(Oxidation)	1	1	P35579	P35579	0	3	0.9545	0	1	1	694.321	2080.95	2080.95	-1.51	-0.00105	HCD (High Energy Collision Dissociation)	MS2	46.4929	25	45.773	37060	MS201900090_4_PKA.raw	F4		44	50	43	0.0451894	0	1.832e-05	1.3655e+06	45.71
		FALSE	High	Mascot (A5)	Unambiguous	[K].SmEAEmIQLQEELAAAER.[A]	M2(Oxidation); M6(Oxidation)	1	1	P35579	P35579	0	2	0.8889	0	1	1	1040.98	2080.95	2080.95	-1.45	-0.00151	HCD (High Energy Collision Dissociation)	MS2	18.8488	18.319	42.0161	33062	MS201900090_4_PKA.raw	F4		117	50	43	2.41663e-09	0	3.527e-11	82116960	41.5
		FALSE	High	Mascot (A5)	Unambiguous	[K].SmEAEmIQLQEELAAAER.[A]	M2(Oxidation); M6(Oxidation)	1	1	P35579	P35579	0	2	0.7833	0	1	1	1040.98	2080.95	2080.95	-1.34	-0.00139	HCD (High Energy Collision Dissociation)	MS2	64.6946	25	58.6512	51132	MS201900090_4_PKA.raw	F4		60	50	43	0.00112076	0	7.624e-07
		FALSE	High	Mascot (A5)	Unambiguous	[K].SmEAEmIQLQEELAAAER.[A]	M2(Oxidation); M6(Oxidation)	1	1	P35579	P35579	0	2	0.8983	0	1	1	1040.98	2080.95	2080.95	-0.47	-0.00049	HCD (High Energy Collision Dissociation)	MS2	25.2874	25	48.9087	40554	MS201900090_4_PKA.raw	F4	Not Reliable	118	50	43	1.614e-09	0	6.373e-10
		FALSE	High	Mascot (A5)	Unambiguous	[K].SmEAEmIQLQEELAAAER.[A]	M2(Oxidation); M6(Oxidation)	1	1	P35579	P35579	0	2	0.8523	0	1	1	1040.98	2080.95	2080.95	-0.41	-0.00042	HCD (High Energy Collision Dissociation)	MS2	58.389	25	52.1228	44114	MS201900090_4_PKA.raw	F4		88	50	43	1.7106e-06	0	1.35e-08	1.24472e+06	52.85
		FALSE	High	Mascot (A5)	Unambiguous	[K].SmEAEmIQLQEELAAAER.[A]	M2(Oxidation); M6(Oxidation)	1	1	P35579	P35579	0	2	0.8911	0	1	1	1040.98	2080.95	2080.95	-0.37	-0.00039	HCD (High Energy Collision Dissociation)	MS2	1.05398	5.568	41.792	32810	MS201900090_4_PKA.raw	F4		101	50	43	9.24486e-08	0	1.428e-09	82116960	41.5
		FALSE	High	Mascot (A5)	Unambiguous	[K].SmEAEmIQLQEELAAAER.[A]	M2(Oxidation); M6(Oxidation)	1	1	P35579	P35579	0	2	0.8387	0	1	1	1040.98	2080.95	2080.95	-1.96	-0.00204	HCD (High Energy Collision Dissociation)	MS2	0	25	55.7662	48135	MS201900090_4_PKA.raw	F4		93	50	43	5.95951e-07	0	9.164e-07	818607	55.32
		FALSE	High	Mascot (A5)	Unambiguous	[K].SmEAEmIQLQEELAAAER.[A]	M2(Oxidation); M6(Oxidation)	1	1	P35579	P35579	0	2	0.8812	0	1	1	1040.97	2080.93	2080.95	-10.22	-0.01064	HCD (High Energy Collision Dissociation)	MS2	0	25	53.1144	45211	MS201900090_4_PKA.raw	F4	Not Reliable	101	50	43	9.19823e-08	0	4.639e-08
		FALSE	High	Mascot (A5)	Unambiguous	[K].SmEAEmIQLQEELAAAER.[A]	M2(Oxidation); M6(Oxidation)	1	1	P35579	P35579	0	2	1	0	1	1	1040.96	2080.92	2080.95	-15.65	-0.01629	HCD (High Energy Collision Dissociation)	MS2	0	25	52.256	44254	MS201900090_4_PKA.raw	F4		49	50	43	0.0130831	0	5.644e-06	1.24472e+06	52.85
		FALSE	High	Mascot (A5)	Unambiguous	[K].SmEAEmIQLQEELAAAER.[A]	M2(Oxidation); M6(Oxidation)	1	1	P35579	P35579	0	2	0.7895	0	1	1	1040.97	2080.94	2080.95	-6.21	-0.00646	HCD (High Energy Collision Dissociation)	MS2	40.0382	25	61.6337	54543	MS201900090_4_PKA.raw	F4		57	50	43	0.00235654	8.015e-05	3.891e-05
		FALSE	High	Mascot (A5)	Unambiguous	[K].SmEAEmIQLQEELAAAER.[A]	M2(Oxidation); M6(Oxidation)	1	1	P35579	P35579	0	2	0.9375	0	1	1	1040.97	2080.94	2080.95	-6.72	-0.00699	HCD (High Energy Collision Dissociation)	MS2	21.2234	25	60.9953	53792	MS201900090_4_PKA.raw	F4		48	50	43	0.0177936	8.015e-05	0.0003
		FALSE	High	Mascot (A5)	Unambiguous	[K].SmEAEmIQLQEELAAAER.[A]	M2(Oxidation); M6(Oxidation)	1	1	P35579	P35579	0	3	0.6667	0	1	1	694.322	2080.95	2080.95	-0.16	-0.00011	HCD (High Energy Collision Dissociation)	MS2	72.1145	25	43.2487	34433	MS201900090_4_PKA.raw	F4		21	50	43	8.23186	8.015e-05	4.126e-05	4.33709e+06	42.36
		FALSE	High	Mascot (A5)	Unambiguous	[K].SmEAEmIQLQEELAAAER.[A]	M2(Oxidation); M6(Oxidation)	1	1	P35579	P35579	0	3	0.7955	0	1	1	694.326	2080.96	2080.95	4.9	0.0034	HCD (High Energy Collision Dissociation)	MS2	47.1277	25	50.5396	42398	MS201900090_4_PKA.raw	F4		44	50	43	0.0492147	8.015e-05	0.0004044
		FALSE	High	Mascot (A5)	Unambiguous	[K].SmEAEmIQLQEELAAAER.[A]	M2(Oxidation); M6(Oxidation)	1	1	P35579	P35579	0	3	0.875	0	1	1	694.322	2080.95	2080.95	-0.86	-0.0006	HCD (High Energy Collision Dissociation)	MS2	79.2643	25	46.787	38212	MS201900090_4_PKA.raw	F4		8	50	43	163.358	0.0004105	0.00843	435952	47.05
		FALSE	High	Mascot (A5)	Unambiguous	[K].SmEAEmIQLQEELAAAER.[A]	M2(Oxidation); M6(Oxidation)	1	1	P35579	P35579	0	2	1	0	1	1	1040.97	2080.93	2080.95	-8.8	-0.00915	HCD (High Energy Collision Dissociation)	MS2	71.0689	25	65.7125	59247	MS201900090_4_PKA.raw	F4		20	50	43	11.5492	0.006384	0.1458
	FALSE	High	[K].SMEAEMIQLQEELAAAER.[A]	1xOxidation [M]		5.55094e-11	0	1	1	59	P35579	P35579 [1677-1694]	0	2064.96	0	100		High	High	0	5.361e-10	137	54.17	K.SMEAEMIQLQEELAAAER.A	[1677-1694]		Used
		Checked	Confidence	Identifying Node	PSM Ambiguity	Annotated Sequence	Modifications	# Protein Groups	# Proteins	Master Protein Accessions	Protein Accessions	# Missed Cleavages	Charge	DeltaScore	DeltaCn	Rank	Search Engine Rank	m/z [Da]	MH+ [Da]	Theo. MH+ [Da]	DeltaM [ppm]	Deltam/z [Da]	Activation Type	MS Order	Isolation Interference [%]	Ion Inject Time [ms]	RT [min]	First Scan	Spectrum File	File ID	Quan Info	Ions Score	Identity Strict	Identity Relaxed	Expectation Value	Percolator q-Value	Percolator PEP	Precursor Abundance	Apex RT [min]
		FALSE	High	Mascot (A5)	Unambiguous	[K].SMEAEmIQLQEELAAAER.[A]	M6(Oxidation)	1	1	P35579	P35579	0	3	0.0714	0	1	1	688.997	2064.98	2064.96	9.79	0.00674	HCD (High Energy Collision Dissociation)	MS2	0	25	50.7716	42651	MS201900090_4_PKA.raw	F4		56	50	43	0.00273816	0	1.535e-06
		FALSE	High	Mascot (A5)	Unambiguous	[K].SmEAEMIQLQEELAAAER.[A]	M2(Oxidation)	1	1	P35579	P35579	0	2	0.0548	0	1	1	1032.99	2064.97	2064.96	6.96	0.00718	HCD (High Energy Collision Dissociation)	MS2	0	25	70.515	64820	MS201900090_4_PKA.raw	F4		73	50	43	5.17212e-05	0	1.355e-05
		FALSE	High	Mascot (A5)	Unambiguous	[K].SmEAEMIQLQEELAAAER.[A]	M2(Oxidation)	1	1	P35579	P35579	0	2	0.5268	0	1	1	1032.98	2064.95	2064.96	-1.49	-0.00154	HCD (High Energy Collision Dissociation)	MS2	0	25	55.6565	48016	MS201900090_4_PKA.raw	F4		112	50	43	8.03271e-09	0	6.501e-11	113089464	54.17
		FALSE	High	Mascot (A5)	Unambiguous	[K].SmEAEMIQLQEELAAAER.[A]	M2(Oxidation)	1	1	P35579	P35579	0	2	0.2929	0	1	1	1032.98	2064.96	2064.96	-1.15	-0.00118	HCD (High Energy Collision Dissociation)	MS2	0	13.085	54.6663	46948	MS201900090_4_PKA.raw	F4		99	50	43	1.52515e-07	0	5.175e-09	113089464	54.17
		FALSE	High	Mascot (A5)	Unambiguous	[K].SmEAEMIQLQEELAAAER.[A]	M2(Oxidation)	1	1	P35579	P35579	0	2	0.3113	0	1	1	1032.98	2064.96	2064.96	-1.12	-0.00116	HCD (High Energy Collision Dissociation)	MS2	15.8113	25	60.3254	53030	MS201900090_4_PKA.raw	F4		106	50	43	2.73677e-08	0	2.451e-09	4.36878e+06	58.96
		FALSE	High	Mascot (A5)	Unambiguous	[K].SmEAEMIQLQEELAAAER.[A]	M2(Oxidation)	1	1	P35579	P35579	0	2	0.5922	0	1	1	1032.98	2064.96	2064.96	-0.92	-0.00095	HCD (High Energy Collision Dissociation)	MS2	0	2.137	54.2038	46450	MS201900090_4_PKA.raw	F4		103	50	43	5.32736e-08	0	1.121e-09	113089464	54.17
		FALSE	High	Mascot (A5)	Unambiguous	[K].SMEAEmIQLQEELAAAER.[A]	M6(Oxidation)	1	1	P35579	P35579	0	3	0.7636	0	1	1	688.99	2064.96	2064.96	-0.92	-0.00063	HCD (High Energy Collision Dissociation)	MS2	57.5891	25	63.8598	57101	MS201900090_4_PKA.raw	F4		55	50	43	0.00352787	0	7.792e-06
		FALSE	High	Mascot (A5)	Unambiguous	[K].SMEAEmIQLQEELAAAER.[A]	M6(Oxidation)	1	1	P35579	P35579	0	2	0.3333	0	1	1	1032.98	2064.95	2064.96	-3.31	-0.00342	HCD (High Energy Collision Dissociation)	MS2	0	25	48.652	40268	MS201900090_4_PKA.raw	F4		117	50	43	2.34471e-09	0	7.842e-09	45537332	49.07
		FALSE	High	Mascot (A5)	Unambiguous	[K].SmEAEMIQLQEELAAAER.[A]	M2(Oxidation)	1	1	P35579	P35579	0	3	0.7636	0	1	2	688.99	2064.96	2064.96	-0.92	-0.00063	HCD (High Energy Collision Dissociation)	MS2	57.5891	25	63.8598	57101	MS201900090_4_PKA.raw	F4		55	50	43	0.00352787	0	1.788e-05
		FALSE	High	Mascot (A5)	Unambiguous	[K].SMEAEmIQLQEELAAAER.[A]	M6(Oxidation)	1	1	P35579	P35579	0	2	0.4836	0	1	1	1032.98	2064.96	2064.96	-0.44	-0.00045	HCD (High Energy Collision Dissociation)	MS2	0	4.462	49.1214	40805	MS201900090_4_PKA.raw	F4		122	50	43	6.35272e-10	0	3.063e-10	45537332	49.07
		FALSE	High	Mascot (A5)	Unambiguous	[K].SMEAEmIQLQEELAAAER.[A]	M6(Oxidation)	1	1	P35579	P35579	0	3	0.7222	0	1	1	688.99	2064.96	2064.96	-0.4	-0.00028	HCD (High Energy Collision Dissociation)	MS2	0	25	60.4874	53223	MS201900090_4_PKA.raw	F4		54	50	43	0.00491517	0	1.139e-05
		FALSE	High	Mascot (A5)	Unambiguous	[K].SmEAEMIQLQEELAAAER.[A]	M2(Oxidation)	1	1	P35579	P35579	0	3	0.7222	0	1	2	688.99	2064.96	2064.96	-0.4	-0.00028	HCD (High Energy Collision Dissociation)	MS2	0	25	60.4874	53223	MS201900090_4_PKA.raw	F4		54	50	43	0.00491517	0	1.304e-05
		FALSE	High	Mascot (A5)	Unambiguous	[K].SMEAEmIQLQEELAAAER.[A]	M6(Oxidation)	1	1	P35579	P35579	0	2	0.4307	0	1	1	1032.98	2064.96	2064.96	-0.11	-0.00012	HCD (High Energy Collision Dissociation)	MS2	25.0631	25	50.6924	42573	MS201900090_4_PKA.raw	F4		137	50	43	2.3043e-11	0	5.361e-10	45537332	49.07
		FALSE	High	Mascot (A5)	Unambiguous	[K].SmEAEMIQLQEELAAAER.[A]	M2(Oxidation)	1	1	P35579	P35579	0	2	0.398	0	1	1	1032.98	2064.96	2064.96	-0.08	-9e-05	HCD (High Energy Collision Dissociation)	MS2	8.15922	25	64.3287	57659	MS201900090_4_PKA.raw	F4		98	50	43	1.77922e-07	0	7.611e-11	968721	64.65
		FALSE	High	Mascot (A5)	Unambiguous	[K].SmEAEMIQLQEELAAAER.[A]	M2(Oxidation)	1	1	P35579	P35579	0	2	0.3139	0	1	1	1032.98	2064.96	2064.96	0.02	2e-05	HCD (High Energy Collision Dissociation)	MS2	16.9998	25	57.5184	49850	MS201900090_4_PKA.raw	F4		137	50	43	2.37789e-11	0	1.168e-10	2013702	56.84
		FALSE	High	Mascot (A5)	Unambiguous	[K].SmEAEMIQLQEELAAAER.[A]	M2(Oxidation)	1	1	P35579	P35579	0	2	0.2857	0	1	1	1032.98	2064.96	2064.96	-0.9	-0.00093	HCD (High Energy Collision Dissociation)	MS2	57.8892	25	71.3329	65774	MS201900090_4_PKA.raw	F4	Not Reliable	56	50	43	0.00256127	0	9.992e-06
		FALSE	High	Mascot (A5)	Unambiguous	[K].SMEAEmIQLQEELAAAER.[A]	M6(Oxidation)	1	1	P35579	P35579	0	2	0.367	0	1	1	1032.98	2064.96	2064.96	0.1	0.0001	HCD (High Energy Collision Dissociation)	MS2	0	25	52.6737	44719	MS201900090_4_PKA.raw	F4		109	50	43	1.51913e-08	0	6.979e-09	2.00569e+06	52.25
		FALSE	High	Mascot (A5)	Unambiguous	[K].SmEAEMIQLQEELAAAER.[A]	M2(Oxidation)	1	1	P35579	P35579	0	2	0.3684	0	1	1	1032.97	2064.94	2064.96	-8.46	-0.00874	HCD (High Energy Collision Dissociation)	MS2	32.9922	25	65.3685	58843	MS201900090_4_PKA.raw	F4		95	50	43	4.1293e-07	0	6.772e-08
		FALSE	High	Mascot (A5)	Unambiguous	[K].SmEAEMIQLQEELAAAER.[A]	M2(Oxidation)	1	1	P35579	P35579	0	2	0.1983	0	1	1	1032.98	2064.95	2064.96	-5.22	-0.00539	HCD (High Energy Collision Dissociation)	MS2	39.0542	25	66.4956	60170	MS201900090_4_PKA.raw	F4		116	50	43	2.78194e-09	0	1.831e-08
		FALSE	High	Mascot (A5)	Unambiguous	[K].SmEAEMIQLQEELAAAER.[A]	M2(Oxidation)	1	1	P35579	P35579	0	2	0.3689	0	1	1	1032.98	2064.95	2064.96	-4.83	-0.00499	HCD (High Energy Collision Dissociation)	MS2	11.0947	25	61.7148	54635	MS201900090_4_PKA.raw	F4		122	50	43	7.27998e-10	0	1.985e-09	1.74711e+06	61.79
		FALSE	High	Mascot (A5)	Unambiguous	[K].SmEAEMIQLQEELAAAER.[A]	M2(Oxidation)	1	1	P35579	P35579	0	2	0.2913	0	1	1	1032.98	2064.95	2064.96	-4.25	-0.00438	HCD (High Energy Collision Dissociation)	MS2	0	25	60.7652	53543	MS201900090_4_PKA.raw	F4		103	50	43	5.5551e-08	0	5.18e-09
		FALSE	High	Mascot (A5)	Unambiguous	[K].SmEAEMIQLQEELAAAER.[A]	M2(Oxidation)	1	1	P35579	P35579	0	2	0.3689	0	1	1	1032.98	2064.95	2064.96	-4.18	-0.00432	HCD (High Energy Collision Dissociation)	MS2	0	25	62.1713	55131	MS201900090_4_PKA.raw	F4		122	50	43	7.14466e-10	0	8.877e-09	1.74711e+06	61.79
		FALSE	High	Mascot (A5)	Unambiguous	[K].SMEAEmIQLQEELAAAER.[A]	M6(Oxidation)	1	1	P35579	P35579	0	3	0.8732	0	1	1	688.988	2064.95	2064.96	-3.83	-0.00264	HCD (High Energy Collision Dissociation)	MS2	56.7853	25	53.7574	45934	MS201900090_4_PKA.raw	F4		71	50	43	9.77158e-05	0	1.179e-06	29799460	54.2
		FALSE	High	Mascot (A5)	Unambiguous	[K].SmEAEMIQLQEELAAAER.[A]	M2(Oxidation)	1	1	P35579	P35579	0	3	0.8732	0	1	2	688.988	2064.95	2064.96	-3.83	-0.00264	HCD (High Energy Collision Dissociation)	MS2	56.7853	25	53.7574	45934	MS201900090_4_PKA.raw	F4		71	50	43	9.77158e-05	0	1.022e-06	29799460	54.2
		FALSE	High	Mascot (A5)	Unambiguous	[K].SmEAEMIQLQEELAAAER.[A]	M2(Oxidation)	1	1	P35579	P35579	0	2	0.1304	0	1	1	1032.98	2064.95	2064.96	-3.54	-0.00366	HCD (High Energy Collision Dissociation)	MS2	26.8873	25	57.9077	50293	MS201900090_4_PKA.raw	F4		92	50	43	8.101e-07	0	1.349e-08	4.36878e+06	58.96
		FALSE	High	Mascot (A5)	Unambiguous	[K].SMEAEmIQLQEELAAAER.[A]	M6(Oxidation)	1	1	P35579	P35579	0	2	0.3333	0	1	1	1032.98	2064.95	2064.96	-3.31	-0.00342	HCD (High Energy Collision Dissociation)	MS2	21.0639	25	53.1442	45247	MS201900090_4_PKA.raw	F4		117	50	43	2.57861e-09	0	1.833e-09	113089464	54.17
		FALSE	High	Mascot (A5)	Unambiguous	[K].SMEAEmIQLQEELAAAER.[A]	M6(Oxidation)	1	1	P35579	P35579	0	3	0.0405	0	1	1	688.991	2064.96	2064.96	0.14	0.0001	HCD (High Energy Collision Dissociation)	MS2	72.0281	25	49.6184	41369	MS201900090_4_PKA.raw	F4		74	50	43	4.00316e-05	0	8.662e-07	10326371	49.07
		FALSE	High	Mascot (A5)	Unambiguous	[K].SMEAEmIQLQEELAAAER.[A]	M6(Oxidation)	1	1	P35579	P35579	0	2	0.3276	0	1	1	1032.98	2064.96	2064.96	0.8	0.00083	HCD (High Energy Collision Dissociation)	MS2	0	25	50.0769	41857	MS201900090_4_PKA.raw	F4		116	50	43	2.52164e-09	0	1.826e-08	45537332	49.07
		FALSE	High	Mascot (A5)	Unambiguous	[K].SmEAEMIQLQEELAAAER.[A]	M2(Oxidation)	1	1	P35579	P35579	0	2	0.3538	0	1	1	1032.98	2064.96	2064.96	1.03	0.00106	HCD (High Energy Collision Dissociation)	MS2	43.1954	25	67.8236	61722	MS201900090_4_PKA.raw	F4		65	50	43	0.000371662	0	1.128e-07
		FALSE	High	Mascot (A5)	Unambiguous	[K].SmEAEMIQLQEELAAAER.[A]	M2(Oxidation)	1	1	P35579	P35579	0	2	0.3689	0	1	1	1032.98	2064.96	2064.96	1.23	0.00127	HCD (High Energy Collision Dissociation)	MS2	0	25	55.1627	47502	MS201900090_4_PKA.raw	F4		122	50	43	6.67618e-10	0	7.807e-12	113089464	54.17
		FALSE	High	Mascot (A5)	Unambiguous	[K].SMEAEmIQLQEELAAAER.[A]	M6(Oxidation)	1	1	P35579	P35579	0	2	0.4569	0	1	1	1032.98	2064.96	2064.96	1.3	0.00134	HCD (High Energy Collision Dissociation)	MS2	4.72965	25	50.5719	42423	MS201900090_4_PKA.raw	F4		116	50	43	2.55913e-09	0	1.068e-08	45537332	49.07
		FALSE	High	Mascot (A5)	Unambiguous	[K].SmEAEMIQLQEELAAAER.[A]	M2(Oxidation)	1	1	P35579	P35579	0	2	0.3388	0	1	1	1032.98	2064.96	2064.96	1.54	0.00159	HCD (High Energy Collision Dissociation)	MS2	20.3635	25	57.9638	50351	MS201900090_4_PKA.raw	F4		121	50	43	7.9845e-10	0	5.53e-09	4.36878e+06	58.96
		FALSE	High	Mascot (A5)	Unambiguous	[K].SMEAEmIQLQEELAAAER.[A]	M6(Oxidation)	1	1	P35579	P35579	0	2	0.4167	0	1	1	1032.98	2064.96	2064.96	1.62	0.00167	HCD (High Energy Collision Dissociation)	MS2	100	25	52.1205	44111	MS201900090_4_PKA.raw	F4	Not Reliable	24	50	43	4.487	0	8.983e-06
		FALSE	High	Mascot (A5)	Unambiguous	[K].SmEAEMIQLQEELAAAER.[A]	M2(Oxidation)	1	1	P35579	P35579	0	2	0.3675	0	1	1	1032.98	2064.96	2064.96	1.99	0.00205	HCD (High Energy Collision Dissociation)	MS2	12.3364	25	58.4754	50947	MS201900090_4_PKA.raw	F4		117	50	43	2.36706e-09	0	4.804e-09	4.36878e+06	58.96
		FALSE	High	Mascot (A5)	Unambiguous	[K].SmEAEMIQLQEELAAAER.[A]	M2(Oxidation)	1	1	P35579	P35579	0	2	0.5492	0	1	1	1032.98	2064.96	2064.96	2.41	0.00248	HCD (High Energy Collision Dissociation)	MS2	0	25	56.5365	48823	MS201900090_4_PKA.raw	F4		122	50	43	6.99092e-10	0	3.633e-10	2013702	56.84
		FALSE	High	Mascot (A5)	Unambiguous	[K].SMEAEmIQLQEELAAAER.[A]	M6(Oxidation)	1	1	P35579	P35579	0	2	0.2703	0	1	1	1032.98	2064.96	2064.96	1.35	0.0014	HCD (High Energy Collision Dissociation)	MS2	25.2453	25	51.5001	43451	MS201900090_4_PKA.raw	F4	Not Reliable	74	50	43	4.96176e-05	0	2.179e-07
		FALSE	High	Mascot (A5)	Unambiguous	[K].SmEAEMIQLQEELAAAER.[A]	M2(Oxidation)	1	1	P35579	P35579	0	3		0.0405	2	2	688.991	2064.96	2064.96	0.14	0.0001	HCD (High Energy Collision Dissociation)	MS2	72.0281	25	49.6184	41369	MS201900090_4_PKA.raw	F4		71	50	43	8.26806e-05	0	7.85e-06	10326371	49.07
		FALSE	High	Mascot (A5)	Unambiguous	[K].SmEAEMIQLQEELAAAER.[A]	M2(Oxidation)	1	1	P35579	P35579	0	2	0.3659	0	1	1	1032.98	2064.96	2064.96	0.23	0.00024	HCD (High Energy Collision Dissociation)	MS2	0	25	59.841	52462	MS201900090_4_PKA.raw	F4		123	50	43	5.79944e-10	0	9.442e-12	4.36878e+06	58.96
		FALSE	High	Mascot (A5)	Unambiguous	[K].SMEAEmIQLQEELAAAER.[A]	M6(Oxidation)	1	1	P35579	P35579	0	2	0.4878	0	1	1	1032.98	2064.96	2064.96	0.38	0.00039	HCD (High Energy Collision Dissociation)	MS2	7.86748	25	51.0592	42976	MS201900090_4_PKA.raw	F4		123	50	43	6.25977e-10	0	1.092e-08	45537332	49.07
		FALSE	High	Mascot (A5)	Unambiguous	[K].SmEAEMIQLQEELAAAER.[A]	M2(Oxidation)	1	1	P35579	P35579	0	2	0.1222	0	1	1	1032.98	2064.96	2064.96	0.39	0.0004	HCD (High Energy Collision Dissociation)	MS2	0	25	57.0216	49337	MS201900090_4_PKA.raw	F4		90	50	43	1.17912e-06	0	1.528e-08	2013702	56.84
		FALSE	High	Mascot (A5)	Unambiguous	[K].SmEAEMIQLQEELAAAER.[A]	M2(Oxidation)	1	1	P35579	P35579	0	2	0.3103	0	1	1	1032.98	2064.96	2064.96	0.42	0.00043	HCD (High Energy Collision Dissociation)	MS2	0	25	58.9085	51425	MS201900090_4_PKA.raw	F4		87	50	43	2.06804e-06	0	1.417e-08	4.36878e+06	58.96
		FALSE	High	Mascot (A5)	Unambiguous	[K].SmEAEMIQLQEELAAAER.[A]	M2(Oxidation)	1	1	P35579	P35579	0	2	0.2672	0	1	1	1032.98	2064.96	2064.96	0.43	0.00045	HCD (High Energy Collision Dissociation)	MS2	12.7316	25	61.2197	54048	MS201900090_4_PKA.raw	F4		116	50	43	2.71993e-09	0	1.135e-10	1.74711e+06	61.79
		FALSE	High	Mascot (A5)	Unambiguous	[K].SmEAEMIQLQEELAAAER.[A]	M2(Oxidation)	1	1	P35579	P35579	0	2	0.3763	0	1	1	1032.98	2064.96	2064.96	0.45	0.00047	HCD (High Energy Collision Dissociation)	MS2	60.979	25	64.802	58204	MS201900090_4_PKA.raw	F4		93	50	43	5.28121e-07	0	5.976e-09	968721	64.65
		FALSE	High	Mascot (A5)	Unambiguous	[K].SmEAEMIQLQEELAAAER.[A]	M2(Oxidation)	1	1	P35579	P35579	0	2	0.3491	0	1	1	1032.98	2064.96	2064.96	0.62	0.00064	HCD (High Energy Collision Dissociation)	MS2	5.64631	25	59.3664	51894	MS201900090_4_PKA.raw	F4		106	50	43	2.52773e-08	0	6.04e-11	4.36878e+06	58.96
		FALSE	High	Mascot (A5)	Unambiguous	[K].SmEAEMIQLQEELAAAER.[A]	M2(Oxidation)	1	1	P35579	P35579	0	2	0.5818	0	1	1	1032.98	2064.96	2064.96	0.64	0.00066	HCD (High Energy Collision Dissociation)	MS2	0	25	56.099	48483	MS201900090_4_PKA.raw	F4		110	50	43	1.23803e-08	0	5.98e-10
		FALSE	High	Mascot (A5)	Unambiguous	[K].SMEAEmIQLQEELAAAER.[A]	M6(Oxidation)	1	1	P35579	P35579	0	3	0.9302	0	1	1	688.991	2064.96	2064.96	0.65	0.00045	HCD (High Energy Collision Dissociation)	MS2	47.7676	25	63.3542	56504	MS201900090_4_PKA.raw	F4		43	50	43	0.0552394	8.015e-05	4.002e-05
		FALSE	High	Mascot (A5)	Unambiguous	[K].SMEAEmIQLQEELAAAER.[A]	M6(Oxidation)	1	1	P35579	P35579	0	3	0.9167	0	1	1	688.993	2064.96	2064.96	2.64	0.00182	HCD (High Energy Collision Dissociation)	MS2	58.769	25	67.2824	61087	MS201900090_4_PKA.raw	F4		24	50	43	4.77146	8.015e-05	0.0004198	226082	66.59
		FALSE	High	Mascot (A5)	Unambiguous	[K].SmEAEMIQLQEELAAAER.[A]	M2(Oxidation)	1	1	P35579	P35579	0	3	0.9167	0	1	2	688.993	2064.96	2064.96	2.64	0.00182	HCD (High Energy Collision Dissociation)	MS2	58.769	25	67.2824	61087	MS201900090_4_PKA.raw	F4		24	50	43	4.77146	8.015e-05	0.0005257	226082	66.59
		FALSE	High	Mascot (A5)	Unambiguous	[K].SmEAEMIQLQEELAAAER.[A]	M2(Oxidation)	1	1	P35579	P35579	0	3	0.1538	0	1	1	688.992	2064.96	2064.96	2.47	0.0017	HCD (High Energy Collision Dissociation)	MS2	51.5607	25	65.3096	58781	MS201900090_4_PKA.raw	F4		26	50	43	2.59691	8.015e-05	0.0002462	284076	64.69
		FALSE	High	Mascot (A5)	Unambiguous	[K].SmEAEMIQLQEELAAAER.[A]	M2(Oxidation)	1	1	P35579	P35579	0	3	0.9302	0	1	2	688.991	2064.96	2064.96	0.65	0.00045	HCD (High Energy Collision Dissociation)	MS2	47.7676	25	63.3542	56504	MS201900090_4_PKA.raw	F4		43	50	43	0.0552394	8.015e-05	0.0002676
		FALSE	High	Mascot (A5)	Unambiguous	[K].SMEAEmIQLQEELAAAER.[A]	M6(Oxidation)	1	1	P35579	P35579	0	3		0.0476	2	2	688.991	2064.96	2064.96	-0.08	-5e-05	HCD (High Energy Collision Dissociation)	MS2	44.8362	25	62.852	55911	MS201900090_4_PKA.raw	F4		40	50	43	0.104768	8.015e-05	0.0004171
		FALSE	High	Mascot (A5)	Unambiguous	[K].SMEAEmIQLQEELAAAER.[A]	M6(Oxidation)	1	1	P35579	P35579	0	2	0.8103	0	1	1	1032.99	2064.97	2064.96	6.95	0.00718	HCD (High Energy Collision Dissociation)	MS2	0	25	70.4175	64711	MS201900090_4_PKA.raw	F4	Not Reliable	58	50	43	0.00187037	8.015e-05	0.0006501
		FALSE	High	Mascot (A5)	Unambiguous	[K].SmEAEMIQLQEELAAAER.[A]	M2(Oxidation)	1	1	P35579	P35579	0	2	0.3488	0	1	1	1032.97	2064.93	2064.96	-11.46	-0.01183	HCD (High Energy Collision Dissociation)	MS2	0	25	69.2029	63313	MS201900090_4_PKA.raw	F4		43	50	43	0.0608344	0.0001341	0.002659	385258	69.22
		FALSE	High	Mascot (A5)	Unambiguous	[K].SMEAEmIQLQEELAAAER.[A]	M6(Oxidation)	1	1	P35579	P35579	0	2	0.0667	0	1	1	1032.98	2064.96	2064.96	1.48	0.00153	HCD (High Energy Collision Dissociation)	MS2	0	25	69.9944	64221	MS201900090_4_PKA.raw	F4		30	50	43	1.12419	0.0001341	0.001319	245248	69.97
		FALSE	High	Mascot (A5)	Unambiguous	[K].SmEAEMIQLQEELAAAER.[A]	M2(Oxidation)	1	1	P35579	P35579	0	2	0.4	0	1	1	1032.98	2064.96	2064.96	1.29	0.00133	HCD (High Energy Collision Dissociation)	MS2	75.3462	25	68.8032	62853	MS201900090_4_PKA.raw	F4		30	50	43	1.1834	0.0001341	0.001791	385258	69.22
		FALSE	High	Mascot (A5)	Unambiguous	[K].SmEAEMIQLQEELAAAER.[A]	M2(Oxidation)	1	1	P35579	P35579	0	3	0.0476	0	1	1	688.991	2064.96	2064.96	-0.08	-5e-05	HCD (High Energy Collision Dissociation)	MS2	44.8362	25	62.852	55911	MS201900090_4_PKA.raw	F4		43	50	43	0.0632746	0.0001341	0.001196
		FALSE	High	Mascot (A5)	Unambiguous	[K].SmEAEMIQLQEELAAAER.[A]	M2(Oxidation)	1	1	P35579	P35579	0	2	0.8103	0	1	2	1032.99	2064.97	2064.96	6.95	0.00718	HCD (High Energy Collision Dissociation)	MS2	0	25	70.4175	64711	MS201900090_4_PKA.raw	F4	Not Reliable	58	50	43	0.00187037	0.0001341	0.001292
		FALSE	High	Mascot (A5)	Unambiguous	[K].SMEAEmIQLQEELAAAER.[A]	M6(Oxidation)	1	1	P35579	P35579	0	3	0.9091	0	1	1	688.994	2064.97	2064.96	4.11	0.00283	HCD (High Energy Collision Dissociation)	MS2	54.3056	25	65.9288	59504	MS201900090_4_PKA.raw	F4		11	50	43	88.3863	0.0002495	0.005034	226082	66.59
		FALSE	High	Mascot (A5)	Unambiguous	[K].SmEAEMIQLQEELAAAER.[A]	M2(Oxidation)	1	1	P35579	P35579	0	3	0.9091	0	1	2	688.994	2064.97	2064.96	4.11	0.00283	HCD (High Energy Collision Dissociation)	MS2	54.3056	25	65.9288	59504	MS201900090_4_PKA.raw	F4		11	50	43	88.3863	0.0004105	0.008199	226082	66.59
	FALSE	High	[K].SMEAEMIQLQEELAAAER.[A]			2.27456e-09	0	1	1	12	P35579	P35579 [1677-1694]	0	2048.96	0	100		High	High	0	4.355e-10	121	66.56	K.SMEAEMIQLQEELAAAER.A	[1677-1694]		Used
		Checked	Confidence	Identifying Node	PSM Ambiguity	Annotated Sequence	Modifications	# Protein Groups	# Proteins	Master Protein Accessions	Protein Accessions	# Missed Cleavages	Charge	DeltaScore	DeltaCn	Rank	Search Engine Rank	m/z [Da]	MH+ [Da]	Theo. MH+ [Da]	DeltaM [ppm]	Deltam/z [Da]	Activation Type	MS Order	Isolation Interference [%]	Ion Inject Time [ms]	RT [min]	First Scan	Spectrum File	File ID	Quan Info	Ions Score	Identity Strict	Identity Relaxed	Expectation Value	Percolator q-Value	Percolator PEP	Precursor Abundance	Apex RT [min]
		FALSE	High	Mascot (A5)	Unambiguous	[K].SMEAEMIQLQEELAAAER.[A]		1	1	P35579	P35579	0	2	0.7917	0	1	1	1024.98	2048.95	2048.96	-4.44	-0.00455	HCD (High Energy Collision Dissociation)	MS2	8.42272	25	70.0377	64264	MS201900090_4_PKA.raw	F4		72	50	43	8.39323e-05	0	8.902e-08
		FALSE	High	Mascot (A5)	Unambiguous	[K].SMEAEMIQLQEELAAAER.[A]		1	1	P35579	P35579	0	3	0.775	0	1	1	683.658	2048.96	2048.96	-1.56	-0.00106	HCD (High Energy Collision Dissociation)	MS2	65.503	25	68.4151	62398	MS201900090_4_PKA.raw	F4		40	50	43	0.114165	0	1.429e-05
		FALSE	High	Mascot (A5)	Unambiguous	[K].SMEAEMIQLQEELAAAER.[A]		1	1	P35579	P35579	0	2	0.8585	0	1	1	1024.98	2048.96	2048.96	-1.44	-0.00148	HCD (High Energy Collision Dissociation)	MS2	4.3517	25	67.8527	61746	MS201900090_4_PKA.raw	F4		106	50	43	2.93015e-08	0	6.779e-10	187143888	66.56
		FALSE	High	Mascot (A5)	Unambiguous	[K].SMEAEMIQLQEELAAAER.[A]		1	1	P35579	P35579	0	2	0.3488	0	1	1	1024.98	2048.96	2048.96	-1.37	-0.00141	HCD (High Energy Collision Dissociation)	MS2	51.0541	25	69.5215	63665	MS201900090_4_PKA.raw	F4		43	50	43	0.0571024	0	1.277e-06	8507757	69.18
		FALSE	High	Mascot (A5)	Unambiguous	[K].SMEAEMIQLQEELAAAER.[A]		1	1	P35579	P35579	0	2	0.8352	0	1	1	1024.98	2048.96	2048.96	-1.09	-0.00112	HCD (High Energy Collision Dissociation)	MS2	0	25	67.3585	61170	MS201900090_4_PKA.raw	F4		91	50	43	8.64102e-07	0	3.782e-09	187143888	66.56
		FALSE	High	Mascot (A5)	Unambiguous	[K].SMEAEMIQLQEELAAAER.[A]		1	1	P35579	P35579	0	2	0.7794	0	1	1	1024.97	2048.94	2048.96	-10.73	-0.01099	HCD (High Energy Collision Dissociation)	MS2	53.6126	25	71.8938	66376	MS201900090_4_PKA.raw	F4		68	51	44	0.000194498	0	1.941e-06	752809	72.19
		FALSE	High	Mascot (A5)	Unambiguous	[K].SMEAEMIQLQEELAAAER.[A]		1	1	P35579	P35579	0	2	0.9008	0	1	1	1024.98	2048.96	2048.96	-1.07	-0.00109	HCD (High Energy Collision Dissociation)	MS2	2.25641	25	66.3838	60033	MS201900090_4_PKA.raw	F4		121	50	43	1.01268e-09	0	4.355e-10	187143888	66.56
		FALSE	High	Mascot (A5)	Unambiguous	[K].SMEAEMIQLQEELAAAER.[A]		1	1	P35579	P35579	0	2	0.8879	0	1	1	1024.98	2048.96	2048.96	-0.49	-0.0005	HCD (High Energy Collision Dissociation)	MS2	0	5.992	66.8561	60587	MS201900090_4_PKA.raw	F4		107	50	43	2.55553e-08	0	8.815e-09	187143888	66.56
		FALSE	High	Mascot (A5)	Unambiguous	[K].SMEAEMIQLQEELAAAER.[A]		1	1	P35579	P35579	0	2	0.9865	0	1	1	1024.99	2048.96	2048.96	0.15	0.00015	HCD (High Energy Collision Dissociation)	MS2	50.1134	25	72.3563	66896	MS201900090_4_PKA.raw	F4		74	50	43	4.40387e-05	0	6.517e-08	752809	72.19
		FALSE	High	Mascot (A5)	Unambiguous	[K].SMEAEMIQLQEELAAAER.[A]		1	1	P35579	P35579	0	2	0.9804	0	1	1	1024.99	2048.96	2048.96	0.49	0.0005	HCD (High Energy Collision Dissociation)	MS2	0	25	70.5517	64864	MS201900090_4_PKA.raw	F4		51	50	43	0.00943698	0	5.885e-07
		FALSE	High	Mascot (A5)	Unambiguous	[K].SMEAEMIQLQEELAAAER.[A]		1	1	P35579	P35579	0	2	0.9663	0	1	1	1025	2049	2048.96	19.17	0.01963	HCD (High Energy Collision Dissociation)	MS2	12.466	25	70.1974	64450	MS201900090_4_PKA.raw	F4		89	49	42	1.15295e-06	0	3.046e-06	651655	70.25
		FALSE	High	Mascot (A5)	Unambiguous	[K].SMEAEMIQLQEELAAAER.[A]		1	1	P35579	P35579	0	2	0.881	0	1	1	1024.99	2048.97	2048.96	2.27	0.00233	HCD (High Energy Collision Dissociation)	MS2	21.4865	25	74.6634	69560	MS201900090_4_PKA.raw	F4		42	50	43	0.0753912	0.0002495	0.005415
	FALSE	High	[K].SGFEPASLKEEVGEEAIVELVENGKK.[V]			7.4959e-07	0	1	1	1	P35579	P35579 [39-64]	2	2788.43	0	100		High	High	0	2.292e-07	41	52.91	K.SGFEPASLKEEVGEEAIVELVENGKK.V	[39-64]		Used
		Checked	Confidence	Identifying Node	PSM Ambiguity	Annotated Sequence	Modifications	# Protein Groups	# Proteins	Master Protein Accessions	Protein Accessions	# Missed Cleavages	Charge	DeltaScore	DeltaCn	Rank	Search Engine Rank	m/z [Da]	MH+ [Da]	Theo. MH+ [Da]	DeltaM [ppm]	Deltam/z [Da]	Activation Type	MS Order	Isolation Interference [%]	Ion Inject Time [ms]	RT [min]	First Scan	Spectrum File	File ID	Quan Info	Ions Score	Identity Strict	Identity Relaxed	Expectation Value	Percolator q-Value	Percolator PEP	Precursor Abundance	Apex RT [min]
		FALSE	High	Mascot (A5)	Unambiguous	[K].SGFEPASLKEEVGEEAIVELVENGKK.[V]		1	1	P35579	P35579	2	3	1	0	1	1	930.149	2788.43	2788.43	2.72	0.00253	HCD (High Energy Collision Dissociation)	MS2	0.466226	3.637	52.9151	44989	MS201900090_4_PKA.raw	F4		41	48	41	0.0560417	0	2.292e-07	35121924	52.91
	FALSE	High	[K].SGFEPASLKEEVGEEAIVELVENGK.[K]			3.4139e-08	0	1	1	4	P35579	P35579 [39-63]	1	2660.33	0	100		High	High	0	8.12e-09	57	61.8	K.SGFEPASLKEEVGEEAIVELVENGK.K	[39-63]		Used
		Checked	Confidence	Identifying Node	PSM Ambiguity	Annotated Sequence	Modifications	# Protein Groups	# Proteins	Master Protein Accessions	Protein Accessions	# Missed Cleavages	Charge	DeltaScore	DeltaCn	Rank	Search Engine Rank	m/z [Da]	MH+ [Da]	Theo. MH+ [Da]	DeltaM [ppm]	Deltam/z [Da]	Activation Type	MS Order	Isolation Interference [%]	Ion Inject Time [ms]	RT [min]	First Scan	Spectrum File	File ID	Quan Info	Ions Score	Identity Strict	Identity Relaxed	Expectation Value	Percolator q-Value	Percolator PEP	Precursor Abundance	Apex RT [min]
		FALSE	High	Mascot (A5)	Unambiguous	[K].SGFEPASLKEEVGEEAIVELVENGK.[K]		1	1	P35579	P35579	1	3	1	0	1	1	887.448	2660.33	2660.33	0.06	5e-05	HCD (High Energy Collision Dissociation)	MS2	0	15.801	62.1231	55076	MS201900090_4_PKA.raw	F4		40	49	42	0.0896721	0	5.322e-08	14093555	61.8
		FALSE	High	Mascot (A5)	Unambiguous	[K].SGFEPASLKEEVGEEAIVELVENGK.[K]		1	1	P35579	P35579	1	3	0.9298	0	1	1	887.449	2660.33	2660.33	0.33	0.00029	HCD (High Energy Collision Dissociation)	MS2	2.09202	10.032	61.6633	54581	MS201900090_4_PKA.raw	F4		57	49	42	0.00219426	0	8.12e-09	14093555	61.8
		FALSE	High	Mascot (A5)	Unambiguous	[K].SGFEPASLKEEVGEEAIVELVENGK.[K]		1	1	P35579	P35579	1	3	1	0	1	1	887.448	2660.33	2660.33	-0.79	-0.0007	HCD (High Energy Collision Dissociation)	MS2	0	10.47	61.7414	54665	MS201900090_4_PKA.raw	F4		40	50	43	0.112563	0	2.958e-08	14093555	61.8
		FALSE	High	Mascot (A5)	Unambiguous	[K].SGFEPASLKEEVGEEAIVELVENGK.[K]		1	1	P35579	P35579	1	3	0.4667	0	1	1	887.437	2660.3	2660.33	-12.72	-0.01128	HCD (High Energy Collision Dissociation)	MS2	0	25	68.4558	62445	MS201900090_4_PKA.raw	F4		15	50	44	36.3648	0.004994	0.1125
	FALSE	High	[R].ELEDATETADAMNR.[E]			2.72485e-07	0	1	1	7	P35579	P35579 [1899-1912]	0	1565.67	0	100		High	High	0	7.701e-08	89	22.89	R.ELEDATETADAMNR.E	[1899-1912]		Used
		Checked	Confidence	Identifying Node	PSM Ambiguity	Annotated Sequence	Modifications	# Protein Groups	# Proteins	Master Protein Accessions	Protein Accessions	# Missed Cleavages	Charge	DeltaScore	DeltaCn	Rank	Search Engine Rank	m/z [Da]	MH+ [Da]	Theo. MH+ [Da]	DeltaM [ppm]	Deltam/z [Da]	Activation Type	MS Order	Isolation Interference [%]	Ion Inject Time [ms]	RT [min]	First Scan	Spectrum File	File ID	Quan Info	Ions Score	Identity Strict	Identity Relaxed	Expectation Value	Percolator q-Value	Percolator PEP	Precursor Abundance	Apex RT [min]
		FALSE	High	Mascot (A5)	Unambiguous	[R].ELEDATETADAMNR.[E]		1	1	P35579	P35579	0	2	0.925	0	1	1	783.342	1565.68	1565.67	1.04	0.00081	HCD (High Energy Collision Dissociation)	MS2	3.01047	15.031	23.2263	13043	MS201900090_4_PKA.raw	F4		80	47	40	6.22889e-06	0	3.595e-07	368798112	22.89
		FALSE	High	Mascot (A5)	Unambiguous	[R].ELEDATETADAMNR.[E]		1	1	P35579	P35579	0	2	0.9326	0	1	1	783.342	1565.68	1565.67	1.02	0.0008	HCD (High Energy Collision Dissociation)	MS2	0	25	19.8772	9258	MS201900090_4_PKA.raw	F4		89	47	40	6.34469e-07	0	7.701e-08
		FALSE	High	Mascot (A5)	Unambiguous	[R].ELEDATETADAMNR.[E]		1	1	P35579	P35579	0	2	0.975	0	1	1	783.341	1565.68	1565.67	0.29	0.00023	HCD (High Energy Collision Dissociation)	MS2	12.9133	22.595	22.7192	12462	MS201900090_4_PKA.raw	F4		80	47	40	5.69949e-06	0	8.297e-07	368798112	22.89
		FALSE	High	Mascot (A5)	Unambiguous	[R].ELEDATETADAMNR.[E]		1	1	P35579	P35579	0	2	0.925	0	1	1	783.34	1565.67	1565.67	-1.4	-0.00109	HCD (High Energy Collision Dissociation)	MS2	0	25	23.6702	13463	MS201900090_4_PKA.raw	F4		80	47	40	5.8986e-06	0	3.499e-07	368798112	22.89
		FALSE	High	Mascot (A5)	Unambiguous	[R].ELEDATETADAMNR.[E]		1	1	P35579	P35579	0	2	0.8413	0	1	1	783.338	1565.67	1565.67	-3.83	-0.003	HCD (High Energy Collision Dissociation)	MS2	56.699	25	24.2014	14010	MS201900090_4_PKA.raw	F4		63	47	40	0.00028832	0	9.496e-07
		FALSE	High	Mascot (A5)	Unambiguous	[R].ELEDATETADAMNR.[E]		1	1	P35579	P35579	0	2	0.7241	0	1	1	783.346	1565.68	1565.67	5.97	0.00468	HCD (High Energy Collision Dissociation)	MS2	0	25	26.1452	15806	MS201900090_4_PKA.raw	F4		29	47	40	0.743731	0.0001341	0.001313
		FALSE	High	Mascot (A5)	Unambiguous	[R].ELEDATETADAMNR.[E]		1	1	P35579	P35579	0	2	0.5714	0	1	1	783.354	1565.7	1565.67	16.73	0.0131	HCD (High Energy Collision Dissociation)	MS2	76.9717	25	26.1122	15766	MS201900090_4_PKA.raw	F4		14	47	40	26.5482	0.0002495	0.005054
	FALSE	High	[R].ELEDATETADAMNR.[E]	1xOxidation [M12]		6.48695e-07	0	1	1	12	P35579	P35579 [1899-1912]	0	1581.67	0	100		High	High	0	7.122e-07	71	16.82	R.ELEDATETADAMNR.E	[1899-1912]		Used
		Checked	Confidence	Identifying Node	PSM Ambiguity	Annotated Sequence	Modifications	# Protein Groups	# Proteins	Master Protein Accessions	Protein Accessions	# Missed Cleavages	Charge	DeltaScore	DeltaCn	Rank	Search Engine Rank	m/z [Da]	MH+ [Da]	Theo. MH+ [Da]	DeltaM [ppm]	Deltam/z [Da]	Activation Type	MS Order	Isolation Interference [%]	Ion Inject Time [ms]	RT [min]	First Scan	Spectrum File	File ID	Quan Info	Ions Score	Identity Strict	Identity Relaxed	Expectation Value	Percolator q-Value	Percolator PEP	Precursor Abundance	Apex RT [min]
		FALSE	High	Mascot (A5)	Unambiguous	[R].ELEDATETADAmNR.[E]	M12(Oxidation)	1	1	P35579	P35579	0	2	0.9434	0	1	1	791.341	1581.67	1581.67	2.54	0.00201	HCD (High Energy Collision Dissociation)	MS2	0	25	20.9735	10496	MS201900090_4_PKA.raw	F4		53	47	40	0.0030881	0	2.881e-05	1.74681e+06	20.49
		FALSE	High	Mascot (A5)	Unambiguous	[R].ELEDATETADAmNR.[E]	M12(Oxidation)	1	1	P35579	P35579	0	2	1	0	1	1	791.34	1581.67	1581.67	1.52	0.0012	HCD (High Energy Collision Dissociation)	MS2	52.2855	25	17.9361	7263	MS201900090_4_PKA.raw	F4		52	47	40	0.00373754	0	1.987e-07	5.04798e+06	18.27
		FALSE	High	Mascot (A5)	Unambiguous	[R].ELEDATETADAmNR.[E]	M12(Oxidation)	1	1	P35579	P35579	0	2	0.9155	0	1	1	791.339	1581.67	1581.67	0.77	0.00061	HCD (High Energy Collision Dissociation)	MS2	0	25	16.5075	5736	MS201900090_4_PKA.raw	F4		71	47	40	4.67034e-05	0	7.122e-07	5219915	16.5
		FALSE	High	Mascot (A5)	Unambiguous	[R].ELEDATETADAmNR.[E]	M12(Oxidation)	1	1	P35579	P35579	0	2	1	0	1	1	791.339	1581.67	1581.67	0.66	0.00052	HCD (High Energy Collision Dissociation)	MS2	26.0079	25	18.8906	8340	MS201900090_4_PKA.raw	F4		63	47	40	0.000302526	0	9.515e-07	2912914	18.56
		FALSE	High	Mascot (A5)	Unambiguous	[R].ELEDATETADAmNR.[E]	M12(Oxidation)	1	1	P35579	P35579	0	2	1	0	1	1	791.339	1581.67	1581.67	0.5	0.00039	HCD (High Energy Collision Dissociation)	MS2	0	5.371	16.9787	6250	MS201900090_4_PKA.raw	F4		60	47	40	0.00060599	0	9.81e-06	712652480	16.82
		FALSE	High	Mascot (A5)	Unambiguous	[R].ELEDATETADAmNR.[E]	M12(Oxidation)	1	1	P35579	P35579	0	2	0.9412	0	1	1	791.338	1581.67	1581.67	-0.59	-0.00047	HCD (High Energy Collision Dissociation)	MS2	0	25	20.5151	9980	MS201900090_4_PKA.raw	F4		51	47	40	0.00451435	0	1.502e-06	1.74681e+06	20.49
		FALSE	High	Mascot (A5)	Unambiguous	[R].ELEDATETADAmNR.[E]	M12(Oxidation)	1	1	P35579	P35579	0	2	1	0	1	1	791.338	1581.67	1581.67	-1.23	-0.00097	HCD (High Energy Collision Dissociation)	MS2	0	25	19.5728	8914	MS201900090_4_PKA.raw	F4		51	47	40	0.0047363	0	1.967e-07
		FALSE	High	Mascot (A5)	Unambiguous	[R].ELEDATETADAmNR.[E]	M12(Oxidation)	1	1	P35579	P35579	0	2	1	0	1	1	791.335	1581.66	1581.67	-3.8	-0.00301	HCD (High Energy Collision Dissociation)	MS2	0	25	20.063	9474	MS201900090_4_PKA.raw	F4		59	47	40	0.000605766	0	5.471e-07	1.74681e+06	20.49
		FALSE	High	Mascot (A5)	Unambiguous	[R].ELEDATETADAmNR.[E]	M12(Oxidation)	1	1	P35579	P35579	0	2	1	0	1	1	791.336	1581.66	1581.67	-3.19	-0.00252	HCD (High Energy Collision Dissociation)	MS2	68.7148	12.407	18.5425	7952	MS201900090_4_PKA.raw	F4		19	47	40	6.98531	8.015e-05	4.895e-05	2912914	18.56
		FALSE	High	Mascot (A5)	Unambiguous	[R].ELEDATETADAmNR.[E]	M12(Oxidation)	1	1	P35579	P35579	0	2	1	0	1	1	791.338	1581.67	1581.67	-0.67	-0.00053	HCD (High Energy Collision Dissociation)	MS2	60.486	25	21.6331	11237	MS201900090_4_PKA.raw	F4		21	47	40	3.91593	8.015e-05	0.0003465
		FALSE	High	Mascot (A5)	Unambiguous	[R].ELEDATETADAmNR.[E]	M12(Oxidation)	1	1	P35579	P35579	0	2	1	0	1	1	791.339	1581.67	1581.67	0.63	0.0005	HCD (High Energy Collision Dissociation)	MS2	26.1105	25	23.0665	12861	MS201900090_4_PKA.raw	F4		38	47	40	0.0974456	8.015e-05	0.0003625
		FALSE	High	Mascot (A5)	Unambiguous	[R].ELEDATETADAmNR.[E]	M12(Oxidation)	1	1	P35579	P35579	0	2	1	0	1	1	791.337	1581.67	1581.67	-1.8	-0.00142	HCD (High Energy Collision Dissociation)	MS2	46.4811	25	18.4008	7795	MS201900090_4_PKA.raw	F4		10	47	40	56.2859	0.0001341	0.002008	2912914	18.56
	FALSE	High	[R].ELEDATETADAMNR.[E]	1xAcetyl [N-Term]; 1xOxidation [M12]	P35579 1xAcetyl [N-Term]	3.1336e-06	0	1	1	1	P35579	P35579 [1899-1912]	0	1623.68	0	100		High	High	0	1.081e-06	70	24.64	R.ELEDATETADAMNR.E	[1899-1912]	1xAcetyl [N-Term]	Used
		Checked	Confidence	Identifying Node	PSM Ambiguity	Annotated Sequence	Modifications	# Protein Groups	# Proteins	Master Protein Accessions	Protein Accessions	# Missed Cleavages	Charge	DeltaScore	DeltaCn	Rank	Search Engine Rank	m/z [Da]	MH+ [Da]	Theo. MH+ [Da]	DeltaM [ppm]	Deltam/z [Da]	Activation Type	MS Order	Isolation Interference [%]	Ion Inject Time [ms]	RT [min]	First Scan	Spectrum File	File ID	Quan Info	Ions Score	Identity Strict	Identity Relaxed	Expectation Value	Percolator q-Value	Percolator PEP	Precursor Abundance	Apex RT [min]
		FALSE	High	Mascot (A5)	Unambiguous	[R].eLEDATETADAmNR.[E]	N-Term(Acetyl); M12(Oxidation)	1	1	P35579	P35579	0	2	0.8714	0	1	1	812.345	1623.68	1623.68	1.29	0.00104	HCD (High Energy Collision Dissociation)	MS2	0	25	24.5161	14306	MS201900090_4_PKA.raw	F4		70	47	40	5.42617e-05	0	1.081e-06	10616268	24.64
	FALSE	High	[R].ELEDATETADAMNR.[E]	1xAcetyl [N-Term]	P35579 1xAcetyl [N-Term]	9.93311e-07	0	1	1	2	P35579	P35579 [1899-1912]	0	1607.69	0	100		High	High	0	5.037e-07	84	33.25	R.ELEDATETADAMNR.E	[1899-1912]	1xAcetyl [N-Term]	Used
		Checked	Confidence	Identifying Node	PSM Ambiguity	Annotated Sequence	Modifications	# Protein Groups	# Proteins	Master Protein Accessions	Protein Accessions	# Missed Cleavages	Charge	DeltaScore	DeltaCn	Rank	Search Engine Rank	m/z [Da]	MH+ [Da]	Theo. MH+ [Da]	DeltaM [ppm]	Deltam/z [Da]	Activation Type	MS Order	Isolation Interference [%]	Ion Inject Time [ms]	RT [min]	First Scan	Spectrum File	File ID	Quan Info	Ions Score	Identity Strict	Identity Relaxed	Expectation Value	Percolator q-Value	Percolator PEP	Precursor Abundance	Apex RT [min]
		FALSE	High	Mascot (A5)	Unambiguous	[R].eLEDATETADAMNR.[E]	N-Term(Acetyl)	1	1	P35579	P35579	0	2	0.9286	0	1	1	804.347	1607.69	1607.69	0.83	0.00067	HCD (High Energy Collision Dissociation)	MS2	0	14.261	33.2073	23288	MS201900090_4_PKA.raw	F4		84	47	40	2.45974e-06	0	5.037e-07	13755279	33.25
		FALSE	High	Mascot (A5)	Unambiguous	[R].eLEDATETADAMNR.[E]	N-Term(Acetyl)	1	1	P35579	P35579	0	2	0.8462	0	1	1	804.347	1607.69	1607.69	0.54	0.00043	HCD (High Energy Collision Dissociation)	MS2	15.6526	25	35.1047	25232	MS201900090_4_PKA.raw	F4		78	47	40	9.16953e-06	0	3.116e-07	1.35725e+06	35.1
	FALSE	High	[K].DLEAHIDSANKNRDEAIK.[Q]			4.01667e-07	0	1	1	1	P35579	P35579 [1621-1638]	2	2039.02	0	100		High	High	0	1.167e-07	32	15.88	K.DLEAHIDSANKNRDEAIK.Q	[1621-1638]		Used
		Checked	Confidence	Identifying Node	PSM Ambiguity	Annotated Sequence	Modifications	# Protein Groups	# Proteins	Master Protein Accessions	Protein Accessions	# Missed Cleavages	Charge	DeltaScore	DeltaCn	Rank	Search Engine Rank	m/z [Da]	MH+ [Da]	Theo. MH+ [Da]	DeltaM [ppm]	Deltam/z [Da]	Activation Type	MS Order	Isolation Interference [%]	Ion Inject Time [ms]	RT [min]	First Scan	Spectrum File	File ID	Quan Info	Ions Score	Identity Strict	Identity Relaxed	Expectation Value	Percolator q-Value	Percolator PEP	Precursor Abundance	Apex RT [min]
		FALSE	High	Mascot (A5)	Unambiguous	[K].DLEAHIDSANKNRDEAIK.[Q]		1	1	P35579	P35579	2	3	0.6562	0	1	1	680.341	2039.01	2039.02	-3.08	-0.00209	HCD (High Energy Collision Dissociation)	MS2	22.8002	25	15.8535	4975	MS201900090_4_PKA.raw	F4		32	49	42	0.577508	0	1.167e-07	25544648	15.88
	FALSE	High	[K].DLEAHIDSANK.[N]			3.99745e-06	0	1	1	2	P35579	P35579 [1621-1631]	0	1212.59	0	100		High	High	0	1.407e-06	72	15.96	K.DLEAHIDSANK.N	[1621-1631]		Used
		Checked	Confidence	Identifying Node	PSM Ambiguity	Annotated Sequence	Modifications	# Protein Groups	# Proteins	Master Protein Accessions	Protein Accessions	# Missed Cleavages	Charge	DeltaScore	DeltaCn	Rank	Search Engine Rank	m/z [Da]	MH+ [Da]	Theo. MH+ [Da]	DeltaM [ppm]	Deltam/z [Da]	Activation Type	MS Order	Isolation Interference [%]	Ion Inject Time [ms]	RT [min]	First Scan	Spectrum File	File ID	Quan Info	Ions Score	Identity Strict	Identity Relaxed	Expectation Value	Percolator q-Value	Percolator PEP	Precursor Abundance	Apex RT [min]
		FALSE	High	Mascot (A5)	Unambiguous	[K].DLEAHIDSANK.[N]		1	1	P35579	P35579	0	2	0.8472	0	1	1	606.797	1212.59	1212.59	0.88	0.00053	HCD (High Energy Collision Dissociation)	MS2	18.4874	25	15.8968	5029	MS201900090_4_PKA.raw	F4		72	46	39	2.70629e-05	0	1.407e-06	240393152	15.96
		FALSE	High	Mascot (A5)	Unambiguous	[K].DLEAHIDSANK.[N]		1	1	P35579	P35579	0	2	0.3226	0	1	1	606.794	1212.58	1212.59	-4.55	-0.00276	HCD (High Energy Collision Dissociation)	MS2	21.4082	25	17.6742	6963	MS201900090_4_PKA.raw	F4		31	46	39	0.369711	8.015e-05	0.000143	2652968	17.68
	FALSE	High	[K].DFSALESQLQDTQELLQEENRQK.[L]	1xAcetyl [N-Term]	P35579 1xAcetyl [N-Term]	1.20719e-07	0	1	1	2	P35579	P35579 [1302-1324]	1	2791.34	0	100		High	High	0	2.854e-06	70	67.66	K.DFSALESQLQDTQELLQEENRQK.L	[1302-1324]	1xAcetyl [N-Term]	Used
		Checked	Confidence	Identifying Node	PSM Ambiguity	Annotated Sequence	Modifications	# Protein Groups	# Proteins	Master Protein Accessions	Protein Accessions	# Missed Cleavages	Charge	DeltaScore	DeltaCn	Rank	Search Engine Rank	m/z [Da]	MH+ [Da]	Theo. MH+ [Da]	DeltaM [ppm]	Deltam/z [Da]	Activation Type	MS Order	Isolation Interference [%]	Ion Inject Time [ms]	RT [min]	First Scan	Spectrum File	File ID	Quan Info	Ions Score	Identity Strict	Identity Relaxed	Expectation Value	Percolator q-Value	Percolator PEP	Precursor Abundance	Apex RT [min]
		FALSE	High	Mascot (A5)	Unambiguous	[K].dFSALESQLQDTQELLQEENRQK.[L]	N-Term(Acetyl)	1	1	P35579	P35579	1	2	0.9714	0	1	1	1396.15	2791.29	2791.34	-18.52	-0.02584	HCD (High Energy Collision Dissociation)	MS2		25	67.6498	61520	MS201900090_4_PKA.raw	F4		70	52	45	0.000187909	0	2.854e-06
		FALSE	High	Mascot (A5)	Unambiguous	[K].dFSALESQLQDTQELLQEENRQK.[L]	N-Term(Acetyl)	1	1	P35579	P35579	1	3	0.8235	0	1	1	931.115	2791.33	2791.34	-2.32	-0.00216	HCD (High Energy Collision Dissociation)	MS2	26.2283	25	67.6554	61525	MS201900090_4_PKA.raw	F4		51	51	44	0.0111224	0	3.186e-08	1.49052e+06	67.66
	FALSE	High	[K].DFSALESQLQDTQELLQEENRQK.[L]			2.53735e-08	0	1	1	3	P35579	P35579 [1302-1324]	1	2749.33	0	100		High	High	0	5.892e-09	89	60.93	K.DFSALESQLQDTQELLQEENRQK.L	[1302-1324]		Used
		Checked	Confidence	Identifying Node	PSM Ambiguity	Annotated Sequence	Modifications	# Protein Groups	# Proteins	Master Protein Accessions	Protein Accessions	# Missed Cleavages	Charge	DeltaScore	DeltaCn	Rank	Search Engine Rank	m/z [Da]	MH+ [Da]	Theo. MH+ [Da]	DeltaM [ppm]	Deltam/z [Da]	Activation Type	MS Order	Isolation Interference [%]	Ion Inject Time [ms]	RT [min]	First Scan	Spectrum File	File ID	Quan Info	Ions Score	Identity Strict	Identity Relaxed	Expectation Value	Percolator q-Value	Percolator PEP	Precursor Abundance	Apex RT [min]
		FALSE	High	Mascot (A5)	Unambiguous	[K].DFSALESQLQDTQELLQEENRQK.[L]		1	1	P35579	P35579	1	3	0.9385	0	1	1	917.11	2749.31	2749.33	-4.64	-0.00426	HCD (High Energy Collision Dissociation)	MS2	31.9545	25	60.6684	53437	MS201900090_4_PKA.raw	F4		65	51	44	0.000494065	0	9.257e-08	49779556	60.93
		FALSE	High	Mascot (A5)	Unambiguous	[K].DFSALESQLQDTQELLQEENRQK.[L]		1	1	P35579	P35579	1	3	0.9821	0	1	1	917.112	2749.32	2749.33	-1.92	-0.00176	HCD (High Energy Collision Dissociation)	MS2	9.31699	25	60.7024	53472	MS201900090_4_PKA.raw	F4		56	51	44	0.00375941	0	7.782e-08	49779556	60.93
		FALSE	High	Mascot (A5)	Unambiguous	[K].DFSALESQLQDTQELLQEENRQK.[L]		1	1	P35579	P35579	1	3	1	0	1	1	917.114	2749.33	2749.33	0.03	3e-05	HCD (High Energy Collision Dissociation)	MS2	2.42855	7.896	61.137	53957	MS201900090_4_PKA.raw	F4		89	51	44	1.71692e-06	0	5.892e-09	49779556	60.93
	FALSE	High	[K].DFSALESQLQDTQELLQEENR.[Q]	1xAcetyl [N-Term]	P35579 1xAcetyl [N-Term]	5.08085e-10	0	1	1	4	P35579	P35579 [1302-1322]	0	2535.18	0	100		High	High	0	8.551e-11	137	72.72	K.DFSALESQLQDTQELLQEENR.Q	[1302-1322]	1xAcetyl [N-Term]	Used
		Checked	Confidence	Identifying Node	PSM Ambiguity	Annotated Sequence	Modifications	# Protein Groups	# Proteins	Master Protein Accessions	Protein Accessions	# Missed Cleavages	Charge	DeltaScore	DeltaCn	Rank	Search Engine Rank	m/z [Da]	MH+ [Da]	Theo. MH+ [Da]	DeltaM [ppm]	Deltam/z [Da]	Activation Type	MS Order	Isolation Interference [%]	Ion Inject Time [ms]	RT [min]	First Scan	Spectrum File	File ID	Quan Info	Ions Score	Identity Strict	Identity Relaxed	Expectation Value	Percolator q-Value	Percolator PEP	Precursor Abundance	Apex RT [min]
		FALSE	High	Mascot (A5)	Unambiguous	[K].dFSALESQLQDTQELLQEENR.[Q]	N-Term(Acetyl)	1	1	P35579	P35579	0	2	0.9487	0	1	1	1268.09	2535.18	2535.18	-3.1	-0.00393	HCD (High Energy Collision Dissociation)	MS2	3.63431	25	71.37	65808	MS201900090_4_PKA.raw	F4		78	51	44	2.62362e-05	0	2.515e-07	1.62363e+06	71.25
		FALSE	High	Mascot (A5)	Unambiguous	[K].dFSALESQLQDTQELLQEENR.[Q]	N-Term(Acetyl)	1	1	P35579	P35579	0	2	0.927	0	1	1	1268.1	2535.18	2535.18	-0.5	-0.00064	HCD (High Energy Collision Dissociation)	MS2	2.31462	9.385	72.7358	67338	MS201900090_4_PKA.raw	F4		137	51	44	2.77349e-11	0	8.551e-11	11722621	72.72
		FALSE	High	Mascot (A5)	Unambiguous	[K].dFSALESQLQDTQELLQEENR.[Q]	N-Term(Acetyl)	1	1	P35579	P35579	0	2	0.8537	0	1	1	1268.09	2535.18	2535.18	-1.78	-0.00225	HCD (High Energy Collision Dissociation)	MS2	59.3637	25	69.8774	64080	MS201900090_4_PKA.raw	F4		41	51	44	0.121961	0.0001341	0.0009541
		FALSE	High	Mascot (A5)	Unambiguous	[K].dFSALESQLQDTQELLQEENR.[Q]	N-Term(Acetyl)	1	1	P35579	P35579	0	2	1	0	1	1	1268.09	2535.18	2535.18	-0.73	-0.00093	HCD (High Energy Collision Dissociation)	MS2		25	74.0839	68900	MS201900090_4_PKA.raw	F4		16	51	44	43.5144	0.009845	0.2148
	FALSE	High	[K].DFSALESQLQDTQELLQEENR.[Q]			9.21586e-12	0	1	1	23	P35579	P35579 [1302-1322]	0	2493.17	0	100		High	High	0	1.275e-10	170	69.44	K.DFSALESQLQDTQELLQEENR.Q	[1302-1322]		Used
		Checked	Confidence	Identifying Node	PSM Ambiguity	Annotated Sequence	Modifications	# Protein Groups	# Proteins	Master Protein Accessions	Protein Accessions	# Missed Cleavages	Charge	DeltaScore	DeltaCn	Rank	Search Engine Rank	m/z [Da]	MH+ [Da]	Theo. MH+ [Da]	DeltaM [ppm]	Deltam/z [Da]	Activation Type	MS Order	Isolation Interference [%]	Ion Inject Time [ms]	RT [min]	First Scan	Spectrum File	File ID	Quan Info	Ions Score	Identity Strict	Identity Relaxed	Expectation Value	Percolator q-Value	Percolator PEP	Precursor Abundance	Apex RT [min]
		FALSE	High	Mascot (A5)	Unambiguous	[K].DFSALESQLQDTQELLQEENR.[Q]		1	1	P35579	P35579	0	2	0.9859	0	1	1	1247.09	2493.16	2493.17	-3.8	-0.00474	HCD (High Energy Collision Dissociation)	MS2	0	25	62.5956	55619	MS201900090_4_PKA.raw	F4		142	51	44	1.02912e-11	0	1.124e-12	2.57043e+06	62.76
		FALSE	High	Mascot (A5)	Unambiguous	[K].DFSALESQLQDTQELLQEENR.[Q]		1	1	P35579	P35579	0	2	0.7963	0	1	1	1247.09	2493.17	2493.17	-2.98	-0.00372	HCD (High Energy Collision Dissociation)	MS2	0	25	73.6886	68445	MS201900090_4_PKA.raw	F4		54	51	44	0.00670625	0	3.277e-06	1.33589e+06	72.38
		FALSE	High	Mascot (A5)	Unambiguous	[K].DFSALESQLQDTQELLQEENR.[Q]		1	1	P35579	P35579	0	2	0.9231	0	1	1	1247.09	2493.17	2493.17	-1.59	-0.00198	HCD (High Energy Collision Dissociation)	MS2	0	25	74.6327	69523	MS201900090_4_PKA.raw	F4		104	51	44	6.64324e-08	0	1.215e-09	208659	74.23
		FALSE	High	Mascot (A5)	Unambiguous	[K].DFSALESQLQDTQELLQEENR.[Q]		1	1	P35579	P35579	0	3	0.9444	0	1	1	831.728	2493.17	2493.17	-1.37	-0.00114	HCD (High Energy Collision Dissociation)	MS2	14.0679	25	72.0208	66519	MS201900090_4_PKA.raw	F4		90	51	44	1.52914e-06	0	5.552e-08
		FALSE	High	Mascot (A5)	Unambiguous	[K].DFSALESQLQDTQELLQEENR.[Q]		1	1	P35579	P35579	0	2	0.7727	0	1	1	1247.09	2493.17	2493.17	-0.71	-0.00089	HCD (High Energy Collision Dissociation)	MS2	23.2274	25	74.1826	69008	MS201900090_4_PKA.raw	F4		44	51	44	0.06309	0	2.062e-05	208659	74.23
		FALSE	High	Mascot (A5)	Unambiguous	[K].DFSALESQLQDTQELLQEENR.[Q]		1	1	P35579	P35579	0	3	0.9355	0	1	1	831.73	2493.17	2493.17	0.12	0.0001	HCD (High Energy Collision Dissociation)	MS2	44.6523	25	72.3804	66927	MS201900090_4_PKA.raw	F4		62	51	44	0.00098078	0	1.095e-07
		FALSE	High	Mascot (A5)	Unambiguous	[K].DFSALESQLQDTQELLQEENR.[Q]		1	1	P35579	P35579	0	2	0.9448	0	1	1	1247.09	2493.18	2493.17	0.59	0.00073	HCD (High Energy Collision Dissociation)	MS2	0	25	70.0313	64259	MS201900090_4_PKA.raw	F4		163	51	44	7.33585e-14	0	4.387e-10	962540672	69.44
		FALSE	High	Mascot (A5)	Unambiguous	[K].DFSALESQLQDTQELLQEENR.[Q]		1	1	P35579	P35579	0	2	0.9941	0	1	1	1247.09	2493.18	2493.17	0.66	0.00083	HCD (High Energy Collision Dissociation)	MS2	5.69955	25	71.0191	65406	MS201900090_4_PKA.raw	F4		170	51	44	1.59375e-14	0	1.275e-10	962540672	69.44
		FALSE	High	Mascot (A5)	Unambiguous	[K].DFSALESQLQDTQELLQEENR.[Q]		1	1	P35579	P35579	0	2	0.9897	0	1	1	1247.09	2493.18	2493.17	0.7	0.00088	HCD (High Energy Collision Dissociation)	MS2	18.9304	25	71.5232	65961	MS201900090_4_PKA.raw	F4		97	51	44	2.70109e-07	0	4.449e-11	962540672	69.44
		FALSE	High	Mascot (A5)	Unambiguous	[K].DFSALESQLQDTQELLQEENR.[Q]		1	1	P35579	P35579	0	2	0.9329	0	1	1	1247.09	2493.18	2493.17	0.73	0.00091	HCD (High Energy Collision Dissociation)	MS2	18.3874	25	69.2966	63427	MS201900090_4_PKA.raw	F4		164	51	44	5.6348e-14	0	1.849e-12	962540672	69.44
		FALSE	High	Mascot (A5)	Unambiguous	[K].DFSALESQLQDTQELLQEENR.[Q]		1	1	P35579	P35579	0	2	1	0	1	1	1247.09	2493.18	2493.17	1.16	0.00144	HCD (High Energy Collision Dissociation)	MS2	0	25	74.8298	69747	MS201900090_4_PKA.raw	F4		84	51	44	6.53186e-06	0	1.975e-09
		FALSE	High	Mascot (A5)	Unambiguous	[K].DFSALESQLQDTQELLQEENR.[Q]		1	1	P35579	P35579	0	2	0.9151	0	1	1	1247.09	2493.18	2493.17	1.41	0.00176	HCD (High Energy Collision Dissociation)	MS2	6.57315	25	70.5322	64842	MS201900090_4_PKA.raw	F4		106	51	44	4.03515e-08	0	1.927e-09	962540672	69.44
		FALSE	High	Mascot (A5)	Unambiguous	[K].DFSALESQLQDTQELLQEENR.[Q]		1	1	P35579	P35579	0	2	1	0	1	1	1247.09	2493.18	2493.17	1.85	0.00231	HCD (High Energy Collision Dissociation)	MS2	31.1367	25	72.4911	67059	MS201900090_4_PKA.raw	F4		57	51	44	0.00283594	0	9.473e-08	1.33589e+06	72.38
		FALSE	High	Mascot (A5)	Unambiguous	[K].DFSALESQLQDTQELLQEENR.[Q]		1	1	P35579	P35579	0	2	0.9371	0	1	1	1247.09	2493.18	2493.17	2.03	0.00252	HCD (High Energy Collision Dissociation)	MS2	6.56429	0.61	69.5356	63683	MS201900090_4_PKA.raw	F4		143	51	44	6.70776e-12	0	2.584e-08	962540672	69.44
		FALSE	High	Mascot (A5)	Unambiguous	[K].DFSALESQLQDTQELLQEENR.[Q]		1	1	P35579	P35579	0	2	0.8718	0	1	1	1247.09	2493.18	2493.17	3.19	0.00397	HCD (High Energy Collision Dissociation)	MS2	42.1236	25	65.7423	59282	MS201900090_4_PKA.raw	F4		39	51	44	0.171804	0	6.143e-08	811473	65.87
		FALSE	High	Mascot (A5)	Unambiguous	[K].DFSALESQLQDTQELLQEENR.[Q]		1	1	P35579	P35579	0	3	0.9524	0	1	1	831.733	2493.18	2493.17	3.83	0.00318	HCD (High Energy Collision Dissociation)	MS2	10.5382	25	68.5249	62519	MS201900090_4_PKA.raw	F4		43	51	44	0.0803305	0	1.141e-05	747579584	69.44
		FALSE	High	Mascot (A5)	Unambiguous	[K].DFSALESQLQDTQELLQEENR.[Q]		1	1	P35579	P35579	0	2	0.9712	0	1	1	1247.1	2493.19	2493.17	5.27	0.00657	HCD (High Energy Collision Dissociation)	MS2	0	25	74.9938	69931	MS201900090_4_PKA.raw	F4		104	51	44	5.42981e-08	0	8.849e-10
		FALSE	High	Mascot (A5)	Unambiguous	[K].DFSALESQLQDTQELLQEENR.[Q]		1	1	P35579	P35579	0	2	1	0	1	1	1247.1	2493.19	2493.17	6.32	0.00787	HCD (High Energy Collision Dissociation)	MS2	20.322	25	65.793	59344	MS201900090_4_PKA.raw	F4		65	51	44	0.000478128	0	9.999e-08	811473	65.87
		FALSE	High	Mascot (A5)	Unambiguous	[K].DFSALESQLQDTQELLQEENR.[Q]		1	1	P35579	P35579	0	2	0.9344	0	1	1	1247.1	2493.19	2493.17	7.05	0.00878	HCD (High Energy Collision Dissociation)	MS2	0	25	67.1141	60893	MS201900090_4_PKA.raw	F4		61	51	44	0.00111868	0	1.232e-08
		FALSE	High	Mascot (A5)	Unambiguous	[K].DFSALESQLQDTQELLQEENR.[Q]		1	1	P35579	P35579	0	2	1	0	1	1	1247.1	2493.2	2493.17	8.78	0.01094	HCD (High Energy Collision Dissociation)	MS2	13.4225	25	73.9023	68691	MS201900090_4_PKA.raw	F4		64	51	44	0.000584568	0	4.67e-06
		FALSE	High	Mascot (A5)	Unambiguous	[K].DFSALESQLQDTQELLQEENR.[Q]		1	1	P35579	P35579	0	2	0.6842	0	1	1	1247.09	2493.17	2493.17	-1.73	-0.00216	HCD (High Energy Collision Dissociation)	MS2	0	25	73.141	67818	MS201900090_4_PKA.raw	F4		38	51	44	0.258711	8.015e-05	0.0001367	1.33589e+06	72.38
		FALSE	High	Mascot (A5)	Unambiguous	[K].DFSALESQLQDTQELLQEENR.[Q]		1	1	P35579	P35579	0	3	0.95	0	1	1	831.728	2493.17	2493.17	-1.71	-0.00142	HCD (High Energy Collision Dissociation)	MS2	14.8436	25	73.8345	68620	MS201900090_4_PKA.raw	F4		20	51	44	14.2357	0.0001341	0.002026
		FALSE	High	Mascot (A5)	Unambiguous	[K].DFSALESQLQDTQELLQEENR.[Q]		1	1	P35579	P35579	0	3	1	0	1	1	831.728	2493.17	2493.17	-2.07	-0.00172	HCD (High Energy Collision Dissociation)	MS2	0	25	74.1701	69003	MS201900090_4_PKA.raw	F4		3	51	44	798.292	0.005726	0.133
	FALSE	High	[RK].AGKLDPHLVLDQLR.[C]			9.09188e-06	0	2	2	2	P35580; P35579	P35580 [687-700]; P35579 [680-693]	1	1574.9	0	100	Shared	High	High	0	3.413e-06	40	33.49	K.AGKLDPHLVLDQLR.C	[680-693]		Used
		Checked	Confidence	Identifying Node	PSM Ambiguity	Annotated Sequence	Modifications	# Protein Groups	# Proteins	Master Protein Accessions	Protein Accessions	# Missed Cleavages	Charge	DeltaScore	DeltaCn	Rank	Search Engine Rank	m/z [Da]	MH+ [Da]	Theo. MH+ [Da]	DeltaM [ppm]	Deltam/z [Da]	Activation Type	MS Order	Isolation Interference [%]	Ion Inject Time [ms]	RT [min]	First Scan	Spectrum File	File ID	Quan Info	Ions Score	Identity Strict	Identity Relaxed	Expectation Value	Percolator q-Value	Percolator PEP	Precursor Abundance	Apex RT [min]
		FALSE	High	Mascot (A5)	Unambiguous	[RK].AGKLDPHLVLDQLR.[C]		2	2	P35580; P35579	P35580; P35579	1	3	0.76	0	1	1	525.639	1574.9	1574.9	-0.03	-1e-05	HCD (High Energy Collision Dissociation)	MS2	0	17.256	33.3453	23368	MS201900090_4_PKA.raw	F4		25	41	34	0.467891	0	7.858e-06	50862856	33.49
		FALSE	High	Mascot (A5)	Unambiguous	[RK].AGKLDPHLVLDQLR.[C]		2	2	P35580; P35579	P35580; P35579	1	3	0.875	0	1	1	525.638	1574.9	1574.9	-0.6	-0.00031	HCD (High Energy Collision Dissociation)	MS2	0	11.683	33.766	23737	MS201900090_4_PKA.raw	F4		40	41	34	0.0147922	0	3.413e-06	50862856	33.49
	FALSE	High	[K].DMFQETMEAMR.[I]			6.42471e-05	0	1	1	2	P35579	P35579 [317-327]	0	1388.56	0	100		High	High	8.015e-05	0.0002018	50	48.16	K.DMFQETMEAMR.I	[317-327]		Used
		Checked	Confidence	Identifying Node	PSM Ambiguity	Annotated Sequence	Modifications	# Protein Groups	# Proteins	Master Protein Accessions	Protein Accessions	# Missed Cleavages	Charge	DeltaScore	DeltaCn	Rank	Search Engine Rank	m/z [Da]	MH+ [Da]	Theo. MH+ [Da]	DeltaM [ppm]	Deltam/z [Da]	Activation Type	MS Order	Isolation Interference [%]	Ion Inject Time [ms]	RT [min]	First Scan	Spectrum File	File ID	Quan Info	Ions Score	Identity Strict	Identity Relaxed	Expectation Value	Percolator q-Value	Percolator PEP	Precursor Abundance	Apex RT [min]
		FALSE	High	Mascot (A5)	Unambiguous	[K].DMFQETMEAMR.[I]		1	1	P35579	P35579	0	2	1	0	1	1	694.786	1388.56	1388.56	-0.05	-3e-05	HCD (High Energy Collision Dissociation)	MS2	54.8575	25	48.4802	40071	MS201900090_4_PKA.raw	F4		33	45	38	0.171577	0	2.819e-05	6064879	48.16
		FALSE	High	Mascot (A5)	Unambiguous	[K].DMFQETMEAMR.[I]		1	1	P35579	P35579	0	2	0.92	0	1	1	694.785	1388.56	1388.56	-1.83	-0.00127	HCD (High Energy Collision Dissociation)	MS2	27.1307	25	48.0264	39572	MS201900090_4_PKA.raw	F4		50	45	38	0.00350707	8.015e-05	0.0002018	6064879	48.16
	FALSE	High	[K].EQADFAIEALAK.[A]			7.86812e-06	0	2	2	94	P35579; Q7Z406	P35579 [408-419]; Q7Z406 [434-445]	0	1305.67	0	100	Shared	High	High	0	2.649e-05	61	39.23	K.EQADFAIEALAK.A	[408-419]		Used
		Checked	Confidence	Identifying Node	PSM Ambiguity	Annotated Sequence	Modifications	# Protein Groups	# Proteins	Master Protein Accessions	Protein Accessions	# Missed Cleavages	Charge	DeltaScore	DeltaCn	Rank	Search Engine Rank	m/z [Da]	MH+ [Da]	Theo. MH+ [Da]	DeltaM [ppm]	Deltam/z [Da]	Activation Type	MS Order	Isolation Interference [%]	Ion Inject Time [ms]	RT [min]	First Scan	Spectrum File	File ID	Quan Info	Ions Score	Identity Strict	Identity Relaxed	Expectation Value	Percolator q-Value	Percolator PEP	Precursor Abundance	Apex RT [min]
		FALSE	High	Mascot (A5)	Unambiguous	[K].EQADFALEALAK.[A]		1	1	Q7Z406	Q7Z406	0	2		0	1	2	653.338	1305.67	1305.67	0.62	0.00041	HCD (High Energy Collision Dissociation)	MS2	0	25	57.292	49639	MS201900090_4_PKA.raw	F4		38	46	39	0.0686551	0	1.265e-05	249788	56.83
		FALSE	High	Mascot (A5)	Unambiguous	[K].EQADFAIEALAK.[A]		1	1	P35579	P35579	0	2	0	0	1	1	653.338	1305.67	1305.67	0.62	0.00041	HCD (High Energy Collision Dissociation)	MS2	0	25	57.292	49639	MS201900090_4_PKA.raw	F4		38	46	39	0.0686551	0	1.265e-05	249788	56.83
		FALSE	High	Mascot (A5)	Unambiguous	[K].EQADFALEALAK.[A]		1	1	Q7Z406	Q7Z406	0	2		0	1	2	653.338	1305.67	1305.67	0.48	0.00032	HCD (High Energy Collision Dissociation)	MS2	0	25	74.7666	69671	MS201900090_4_PKA.raw	F4		48	46	39	0.00732273	0	8.091e-06	265765	74.4
		FALSE	High	Mascot (A5)	Unambiguous	[K].EQADFAIEALAK.[A]		1	1	P35579	P35579	0	2	0	0	1	1	653.338	1305.67	1305.67	0.48	0.00032	HCD (High Energy Collision Dissociation)	MS2	0	25	74.7666	69671	MS201900090_4_PKA.raw	F4		48	46	39	0.00732273	0	8.091e-06	265765	74.4
		FALSE	High	Mascot (A5)	Unambiguous	[K].EQADFALEALAK.[A]		1	1	Q7Z406	Q7Z406	0	2		0	1	2	653.338	1305.67	1305.67	0.24	0.00016	HCD (High Energy Collision Dissociation)	MS2	0	25	51.325	43270	MS201900090_4_PKA.raw	F4		43	46	39	0.0241468	0	3.057e-05	588900	50.71
		FALSE	High	Mascot (A5)	Unambiguous	[K].EQADFAIEALAK.[A]		1	1	P35579	P35579	0	2	0	0	1	1	653.338	1305.67	1305.67	0.24	0.00016	HCD (High Energy Collision Dissociation)	MS2	0	25	51.325	43270	MS201900090_4_PKA.raw	F4		43	46	39	0.0241468	0	3.057e-05	588900	50.71
		FALSE	High	Mascot (A5)	Unambiguous	[K].EQADFALEALAK.[A]		1	1	Q7Z406	Q7Z406	0	2		0	1	2	653.338	1305.67	1305.67	-0.47	-0.00031	HCD (High Energy Collision Dissociation)	MS2	61.7669	25	73.8283	68612	MS201900090_4_PKA.raw	F4		47	46	39	0.00822877	0	1.795e-05
		FALSE	High	Mascot (A5)	Unambiguous	[K].EQADFAIEALAK.[A]		1	1	P35579	P35579	0	2	0	0	1	1	653.338	1305.67	1305.67	-0.47	-0.00031	HCD (High Energy Collision Dissociation)	MS2	61.7669	25	73.8283	68612	MS201900090_4_PKA.raw	F4		47	46	39	0.00822877	0	1.795e-05
		FALSE	High	Mascot (A5)	Unambiguous	[K].EQADFALEALAK.[A]		1	1	Q7Z406	Q7Z406	0	2		0	1	2	653.338	1305.67	1305.67	-0.5	-0.00033	HCD (High Energy Collision Dissociation)	MS2	0	25	73.2537	67946	MS201900090_4_PKA.raw	F4		53	46	39	0.00249652	0	2.914e-06
		FALSE	High	Mascot (A5)	Unambiguous	[K].EQADFAIEALAK.[A]		1	1	P35579	P35579	0	2	0	0	1	1	653.338	1305.67	1305.67	-0.5	-0.00033	HCD (High Energy Collision Dissociation)	MS2	0	25	73.2537	67946	MS201900090_4_PKA.raw	F4		53	46	39	0.00249652	0	2.914e-06
		FALSE	High	Mascot (A5)	Unambiguous	[K].EQADFALEALAK.[A]		1	1	Q7Z406	Q7Z406	0	2		0	1	2	653.337	1305.67	1305.67	-1.13	-0.00074	HCD (High Energy Collision Dissociation)	MS2	48.3397	25	55.6937	48063	MS201900090_4_PKA.raw	F4		47	46	39	0.00801211	0	8.123e-06
		FALSE	High	Mascot (A5)	Unambiguous	[K].EQADFAIEALAK.[A]		1	1	P35579	P35579	0	2	0	0	1	1	653.337	1305.67	1305.67	-1.13	-0.00074	HCD (High Energy Collision Dissociation)	MS2	48.3397	25	55.6937	48063	MS201900090_4_PKA.raw	F4		47	46	39	0.00801211	0	8.123e-06
		FALSE	High	Mascot (A5)	Unambiguous	[K].EQADFALEALAK.[A]		1	1	Q7Z406	Q7Z406	0	2		0	1	2	653.336	1305.67	1305.67	-2.34	-0.00153	HCD (High Energy Collision Dissociation)	MS2	0	25	72.1156	66630	MS201900090_4_PKA.raw	F4		61	46	39	0.000347506	0	2.649e-05	679287	72.02
		FALSE	High	Mascot (A5)	Unambiguous	[K].EQADFAIEALAK.[A]		1	1	P35579	P35579	0	2	0	0	1	1	653.336	1305.67	1305.67	-2.34	-0.00153	HCD (High Energy Collision Dissociation)	MS2	0	25	72.1156	66630	MS201900090_4_PKA.raw	F4		61	46	39	0.000347506	0	2.649e-05	679287	72.02
		FALSE	High	Mascot (A5)	Unambiguous	[K].EQADFALEALAK.[A]		1	1	Q7Z406	Q7Z406	0	2		0	1	2	653.336	1305.67	1305.67	-2.58	-0.00169	HCD (High Energy Collision Dissociation)	MS2	63.9821	25	49.4334	41159	MS201900090_4_PKA.raw	F4		29	46	39	0.513315	0	1.641e-05	418615	49.6
		FALSE	High	Mascot (A5)	Unambiguous	[K].EQADFAIEALAK.[A]		1	1	P35579	P35579	0	2	0	0	1	1	653.336	1305.67	1305.67	-2.58	-0.00169	HCD (High Energy Collision Dissociation)	MS2	63.9821	25	49.4334	41159	MS201900090_4_PKA.raw	F4		29	46	39	0.513315	0	1.641e-05	418615	49.6
		FALSE	High	Mascot (A5)	Unambiguous	[K].EQADFALEALAK.[A]		1	1	Q7Z406	Q7Z406	0	2		0	1	2	653.337	1305.67	1305.67	-1.46	-0.00095	HCD (High Energy Collision Dissociation)	MS2	0	25	46.1016	37422	MS201900090_4_PKA.raw	F4		36	46	39	0.122261	8.015e-05	0.0001519
		FALSE	High	Mascot (A5)	Unambiguous	[K].EQADFAIEALAK.[A]		1	1	P35579	P35579	0	2	0	0	1	1	653.337	1305.67	1305.67	-1.46	-0.00095	HCD (High Energy Collision Dissociation)	MS2	0	25	46.1016	37422	MS201900090_4_PKA.raw	F4		36	46	39	0.122261	8.015e-05	0.0001519
		FALSE	High	Mascot (A5)	Unambiguous	[K].EQADFALEALAK.[A]		1	1	Q7Z406	Q7Z406	0	2		0	1	2	653.337	1305.67	1305.67	-1.95	-0.00127	HCD (High Energy Collision Dissociation)	MS2	28.3383	25	71.1449	65560	MS201900090_4_PKA.raw	F4		36	46	39	0.105203	8.015e-05	5.574e-05
		FALSE	High	Mascot (A5)	Unambiguous	[K].EQADFAIEALAK.[A]		1	1	P35579	P35579	0	2	0	0	1	1	653.337	1305.67	1305.67	-1.95	-0.00127	HCD (High Energy Collision Dissociation)	MS2	28.3383	25	71.1449	65560	MS201900090_4_PKA.raw	F4		36	46	39	0.105203	8.015e-05	5.574e-05
		FALSE	High	Mascot (A5)	Unambiguous	[K].EQADFALEALAK.[A]		1	1	Q7Z406	Q7Z406	0	2		0	1	2	653.336	1305.66	1305.67	-2.92	-0.00191	HCD (High Energy Collision Dissociation)	MS2	0	25	54.5289	46799	MS201900090_4_PKA.raw	F4		20	46	39	3.98869	8.015e-05	0.0004225
		FALSE	High	Mascot (A5)	Unambiguous	[K].EQADFALEALAK.[A]		1	1	Q7Z406	Q7Z406	0	2		0	1	2	653.335	1305.66	1305.67	-3.89	-0.00254	HCD (High Energy Collision Dissociation)	MS2	29.6393	25	66.3054	59946	MS201900090_4_PKA.raw	F4		42	46	39	0.030182	8.015e-05	4.95e-05
		FALSE	High	Mascot (A5)	Unambiguous	[K].EQADFAIEALAK.[A]		1	1	P35579	P35579	0	2	0	0	1	1	653.335	1305.66	1305.67	-3.89	-0.00254	HCD (High Energy Collision Dissociation)	MS2	29.6393	25	66.3054	59946	MS201900090_4_PKA.raw	F4		42	46	39	0.030182	8.015e-05	4.95e-05
		FALSE	High	Mascot (A5)	Unambiguous	[K].EQADFALEALAK.[A]		1	1	Q7Z406	Q7Z406	0	2		0	1	2	653.335	1305.66	1305.67	-4.9	-0.0032	HCD (High Energy Collision Dissociation)	MS2	61.0103	25	46.6135	38014	MS201900090_4_PKA.raw	F4		32	46	39	0.286604	8.015e-05	0.0002038
		FALSE	High	Mascot (A5)	Unambiguous	[K].EQADFAIEALAK.[A]		1	1	P35579	P35579	0	2	0	0	1	1	653.335	1305.66	1305.67	-4.9	-0.0032	HCD (High Energy Collision Dissociation)	MS2	61.0103	25	46.6135	38014	MS201900090_4_PKA.raw	F4		32	46	39	0.286604	8.015e-05	0.0002038
		FALSE	High	Mascot (A5)	Unambiguous	[K].EQADFALEALAK.[A]		1	1	Q7Z406	Q7Z406	0	2		0	1	2	653.333	1305.66	1305.67	-7.01	-0.00457	HCD (High Energy Collision Dissociation)	MS2	20.2245	25	50.5	42350	MS201900090_4_PKA.raw	F4		8	46	39	80.6108	8.015e-05	0.0001671	588900	50.71
		FALSE	High	Mascot (A5)	Unambiguous	[K].EQADFAIEALAK.[A]		1	1	P35579	P35579	0	2	0	0	1	1	653.333	1305.66	1305.67	-7.01	-0.00457	HCD (High Energy Collision Dissociation)	MS2	20.2245	25	50.5	42350	MS201900090_4_PKA.raw	F4		8	46	39	80.6108	8.015e-05	0.0001671	588900	50.71
		FALSE	High	Mascot (A5)	Unambiguous	[K].EQADFAIEALAK.[A]		1	1	P35579	P35579	0	2	0	0	1	1	653.336	1305.66	1305.67	-2.92	-0.00191	HCD (High Energy Collision Dissociation)	MS2	0	25	54.5289	46799	MS201900090_4_PKA.raw	F4		20	46	39	3.98869	8.015e-05	0.0004225
		FALSE	High	Mascot (A5)	Unambiguous	[K].EQADFAIEALAK.[A]		1	1	P35579	P35579	0	2	0	0	1	1	653.337	1305.67	1305.67	-1.35	-0.00088	HCD (High Energy Collision Dissociation)	MS2	63.7674	25	69.0599	63148	MS201900090_4_PKA.raw	F4		27	46	39	0.849264	8.015e-05	0.0001568
		FALSE	High	Mascot (A5)	Unambiguous	[K].EQADFALEALAK.[A]		1	1	Q7Z406	Q7Z406	0	2		0	1	2	653.337	1305.67	1305.67	-1.35	-0.00088	HCD (High Energy Collision Dissociation)	MS2	63.7674	25	69.0599	63148	MS201900090_4_PKA.raw	F4		27	46	39	0.849264	8.015e-05	0.0001568
		FALSE	High	Mascot (A5)	Unambiguous	[K].EQADFAIEALAK.[A]		1	1	P35579	P35579	0	2	0	0	1	1	653.337	1305.67	1305.67	-1.35	-0.00088	HCD (High Energy Collision Dissociation)	MS2	75.5817	25	71.6351	66094	MS201900090_4_PKA.raw	F4		15	46	39	13.063	8.015e-05	0.0001082	679287	72.02
		FALSE	High	Mascot (A5)	Unambiguous	[K].EQADFALEALAK.[A]		1	1	Q7Z406	Q7Z406	0	2		0	1	2	653.337	1305.67	1305.67	-1.35	-0.00088	HCD (High Energy Collision Dissociation)	MS2	75.5817	25	71.6351	66094	MS201900090_4_PKA.raw	F4		15	46	39	13.063	8.015e-05	0.0001082	679287	72.02
		FALSE	High	Mascot (A5)	Unambiguous	[K].EQADFALEALAK.[A]		1	1	Q7Z406	Q7Z406	0	2		0	1	2	653.338	1305.67	1305.67	0.34	0.00022	HCD (High Energy Collision Dissociation)	MS2	66.7597	25	62.5598	55576	MS201900090_4_PKA.raw	F4		34	46	39	0.202817	8.015e-05	0.0002069	158336	62.24
		FALSE	High	Mascot (A5)	Unambiguous	[K].EQADFAIEALAK.[A]		1	1	P35579	P35579	0	2	0	0	1	1	653.338	1305.67	1305.67	0.34	0.00022	HCD (High Energy Collision Dissociation)	MS2	66.7597	25	62.5598	55576	MS201900090_4_PKA.raw	F4		34	46	39	0.202817	8.015e-05	0.0002069	158336	62.24
		FALSE	High	Mascot (A5)	Unambiguous	[K].EQADFALEALAK.[A]		1	1	Q7Z406	Q7Z406	0	2		0	1	2	653.338	1305.67	1305.67	-0.09	-6e-05	HCD (High Energy Collision Dissociation)	MS2	71.6787	25	48.9241	40574	MS201900090_4_PKA.raw	F4		12	46	39	29.3669	8.015e-05	0.0001819
		FALSE	High	Mascot (A5)	Unambiguous	[K].EQADFAIEALAK.[A]		1	1	P35579	P35579	0	2	0	0	1	1	653.338	1305.67	1305.67	-0.09	-6e-05	HCD (High Energy Collision Dissociation)	MS2	71.6787	25	48.9241	40574	MS201900090_4_PKA.raw	F4		12	46	39	29.3669	8.015e-05	0.0001819
		FALSE	High	Mascot (A5)	Unambiguous	[K].EQADFALEALAK.[A]		1	1	Q7Z406	Q7Z406	0	2		0	1	2	653.338	1305.67	1305.67	-0.2	-0.00013	HCD (High Energy Collision Dissociation)	MS2	22.3594	25	47.1152	38584	MS201900090_4_PKA.raw	F4		34	46	39	0.182811	8.015e-05	8.163e-05
		FALSE	High	Mascot (A5)	Unambiguous	[K].EQADFAIEALAK.[A]		1	1	P35579	P35579	0	2	0	0	1	1	653.338	1305.67	1305.67	-0.2	-0.00013	HCD (High Energy Collision Dissociation)	MS2	22.3594	25	47.1152	38584	MS201900090_4_PKA.raw	F4		34	46	39	0.182811	8.015e-05	8.163e-05
		FALSE	High	Mascot (A5)	Unambiguous	[K].EQADFAIEALAK.[A]		1	1	P35579	P35579	0	2	0	0	1	1	653.338	1305.67	1305.67	0.38	0.00025	HCD (High Energy Collision Dissociation)	MS2	0	25	74.3052	69155	MS201900090_4_PKA.raw	F4		41	46	39	0.0369428	8.015e-05	3.363e-05	265765	74.4
		FALSE	High	Mascot (A5)	Unambiguous	[K].EQADFAIEALAK.[A]		1	1	P35579	P35579	0	2	0	0	1	1	653.338	1305.67	1305.67	-0.46	-0.0003	HCD (High Energy Collision Dissociation)	MS2	21.4146	25	42.6526	33748	MS201900090_4_PKA.raw	F4		35	46	39	0.143991	8.015e-05	0.000539	7.24014e+06	41.36
		FALSE	High	Mascot (A5)	Unambiguous	[K].EQADFALEALAK.[A]		1	1	Q7Z406	Q7Z406	0	2		0	1	2	653.337	1305.67	1305.67	-0.6	-0.00039	HCD (High Energy Collision Dissociation)	MS2	36.7441	25	63.2742	56415	MS201900090_4_PKA.raw	F4		20	46	39	4.44974	8.015e-05	9.595e-05
		FALSE	High	Mascot (A5)	Unambiguous	[K].EQADFAIEALAK.[A]		1	1	P35579	P35579	0	2	0	0	1	1	653.337	1305.67	1305.67	-0.6	-0.00039	HCD (High Energy Collision Dissociation)	MS2	36.7441	25	63.2742	56415	MS201900090_4_PKA.raw	F4		20	46	39	4.44974	8.015e-05	9.595e-05
		FALSE	High	Mascot (A5)	Rejected	[K].EQADFALEALAK.[A]		1	1	Q7Z406	Q7Z406	0	2		0	2	3	653.337	1305.67	1305.67	-0.63	-0.00041	HCD (High Energy Collision Dissociation)	MS2	48.414	25	44.5585	35884	MS201900090_4_PKA.raw	F4		34	46	39	0.197394	8.015e-05	0.0002796
		FALSE	High	Mascot (A5)	Selected	[K].EQADFAIEALAK.[A]		1	1	P35579	P35579	0	2		0	2	2	653.337	1305.67	1305.67	-0.63	-0.00041	HCD (High Energy Collision Dissociation)	MS2	48.414	25	44.5585	35884	MS201900090_4_PKA.raw	F4		34	46	39	0.197394	8.015e-05	0.0002796
		FALSE	High	Mascot (A5)	Unambiguous	[K].EQADFALEALAK.[A]		1	1	Q7Z406	Q7Z406	0	2		0	1	2	653.338	1305.67	1305.67	-0.46	-0.0003	HCD (High Energy Collision Dissociation)	MS2	21.4146	25	42.6526	33748	MS201900090_4_PKA.raw	F4		35	46	39	0.143991	8.015e-05	0.000539	7.24014e+06	41.36
		FALSE	High	Mascot (A5)	Unambiguous	[K].EQADFALEALAK.[A]		1	1	Q7Z406	Q7Z406	0	2		0	1	2	653.338	1305.67	1305.67	0.38	0.00025	HCD (High Energy Collision Dissociation)	MS2	0	25	74.3052	69155	MS201900090_4_PKA.raw	F4		41	46	39	0.0369428	8.015e-05	3.363e-05	265765	74.4
		FALSE	High	Mascot (A5)	Unambiguous	[K].EQADFAIEALAK.[A]		1	1	P35579	P35579	0	2	0	0	1	1	653.338	1305.67	1305.67	0.48	0.00031	HCD (High Energy Collision Dissociation)	MS2	49.9357	25	52.4754	44493	MS201900090_4_PKA.raw	F4		14	46	39	16.9697	8.015e-05	3.417e-05	880594	52.83
		FALSE	High	Mascot (A5)	Unambiguous	[K].EQADFALEALAK.[A]		1	1	Q7Z406	Q7Z406	0	2		0	1	2	653.338	1305.67	1305.67	0.48	0.00031	HCD (High Energy Collision Dissociation)	MS2	49.9357	25	52.4754	44493	MS201900090_4_PKA.raw	F4		14	46	39	16.9697	8.015e-05	3.417e-05	880594	52.83
		FALSE	High	Mascot (A5)	Unambiguous	[K].EQADFALEALAK.[A]		1	1	Q7Z406	Q7Z406	0	2		0	1	2	653.342	1305.68	1305.67	5.53	0.00361	HCD (High Energy Collision Dissociation)	MS2	30.2776	25	50.733	42608	MS201900090_4_PKA.raw	F4		18	46	39	6.79403	8.015e-05	0.0002492	588900	50.71
		FALSE	High	Mascot (A5)	Unambiguous	[K].EQADFAIEALAK.[A]		1	1	P35579	P35579	0	2	0	0	1	1	653.342	1305.68	1305.67	5.53	0.00361	HCD (High Energy Collision Dissociation)	MS2	30.2776	25	50.733	42608	MS201900090_4_PKA.raw	F4		18	46	39	6.79403	8.015e-05	0.0002492	588900	50.71
		FALSE	High	Mascot (A5)	Unambiguous	[K].EQADFALEALAK.[A]		1	1	Q7Z406	Q7Z406	0	2		0	1	2	653.339	1305.67	1305.67	1.88	0.00123	HCD (High Energy Collision Dissociation)	MS2	19.5985	25	67.5282	61370	MS201900090_4_PKA.raw	F4		42	46	39	0.0298942	8.015e-05	0.0005811
		FALSE	High	Mascot (A5)	Unambiguous	[K].EQADFAIEALAK.[A]		1	1	P35579	P35579	0	2	0	0	1	1	653.339	1305.67	1305.67	1.88	0.00123	HCD (High Energy Collision Dissociation)	MS2	19.5985	25	67.5282	61370	MS201900090_4_PKA.raw	F4		42	46	39	0.0298942	8.015e-05	0.0005811
		FALSE	High	Mascot (A5)	Unambiguous	[K].EQADFALEALAK.[A]		1	1	Q7Z406	Q7Z406	0	2		0	1	2	653.339	1305.67	1305.67	0.99	0.00064	HCD (High Energy Collision Dissociation)	MS2	34.9985	25	48.1831	39740	MS201900090_4_PKA.raw	F4		22	46	39	2.87215	8.015e-05	0.0005041
		FALSE	High	Mascot (A5)	Unambiguous	[K].EQADFAIEALAK.[A]		1	1	P35579	P35579	0	2	0	0	1	1	653.339	1305.67	1305.67	0.99	0.00064	HCD (High Energy Collision Dissociation)	MS2	34.9985	25	48.1831	39740	MS201900090_4_PKA.raw	F4		22	46	39	2.87215	8.015e-05	0.0005041
		FALSE	High	Mascot (A5)	Unambiguous	[K].EQADFALEALAK.[A]		1	1	Q7Z406	Q7Z406	0	2		0	1	2	653.339	1305.67	1305.67	0.96	0.00063	HCD (High Energy Collision Dissociation)	MS2	25.6238	25	44.0832	35379	MS201900090_4_PKA.raw	F4		55	46	39	0.00152478	8.015e-05	0.0006379
		FALSE	High	Mascot (A5)	Unambiguous	[K].EQADFAIEALAK.[A]		1	1	P35579	P35579	0	2	0	0	1	1	653.339	1305.67	1305.67	0.96	0.00063	HCD (High Energy Collision Dissociation)	MS2	25.6238	25	44.0832	35379	MS201900090_4_PKA.raw	F4		55	46	39	0.00152478	8.015e-05	0.0006379
		FALSE	High	Mascot (A5)	Unambiguous	[K].EQADFALEALAK.[A]		1	1	Q7Z406	Q7Z406	0	2		0	1	2	653.338	1305.67	1305.67	0.58	0.00038	HCD (High Energy Collision Dissociation)	MS2	34.981	25	58.3031	50744	MS201900090_4_PKA.raw	F4		39	46	39	0.0571049	8.015e-05	0.0002224	179158	58.58
		FALSE	High	Mascot (A5)	Unambiguous	[K].EQADFAIEALAK.[A]		1	1	P35579	P35579	0	2	0	0	1	1	653.338	1305.67	1305.67	0.58	0.00038	HCD (High Energy Collision Dissociation)	MS2	34.981	25	58.3031	50744	MS201900090_4_PKA.raw	F4		39	46	39	0.0571049	8.015e-05	0.0002224	179158	58.58
		FALSE	High	Mascot (A5)	Unambiguous	[K].EQADFALEALAK.[A]		1	1	Q7Z406	Q7Z406	0	2		0	1	2	653.338	1305.67	1305.67	0.04	3e-05	HCD (High Energy Collision Dissociation)	MS2	23.9693	25	43.6112	34851	MS201900090_4_PKA.raw	F4		34	46	39	0.174556	0.0001341	0.0007921	2.07984e+06	43.32
		FALSE	High	Mascot (A5)	Unambiguous	[K].EQADFAIEALAK.[A]		1	1	P35579	P35579	0	2	0	0	1	1	653.338	1305.67	1305.67	0.41	0.00027	HCD (High Energy Collision Dissociation)	MS2	31.4978	25	41.2553	32202	MS201900090_4_PKA.raw	F4		38	46	39	0.0695872	0.0001341	0.001906	7.24014e+06	41.36
		FALSE	High	Mascot (A5)	Unambiguous	[K].EQADFAIEALAK.[A]		1	1	P35579	P35579	0	2	0	0	1	1	653.338	1305.67	1305.67	0.04	3e-05	HCD (High Energy Collision Dissociation)	MS2	23.9693	25	43.6112	34851	MS201900090_4_PKA.raw	F4		34	46	39	0.174556	0.0001341	0.0007921	2.07984e+06	43.32
		FALSE	High	Mascot (A5)	Unambiguous	[K].EQADFALEALAK.[A]		1	1	Q7Z406	Q7Z406	0	2		0	1	2	653.338	1305.67	1305.67	0.41	0.00027	HCD (High Energy Collision Dissociation)	MS2	31.4978	25	41.2553	32202	MS201900090_4_PKA.raw	F4		38	46	39	0.0695872	0.0001341	0.001906	7.24014e+06	41.36
		FALSE	High	Mascot (A5)	Unambiguous	[K].EQADFALEALAK.[A]		1	1	Q7Z406	Q7Z406	0	2		0	1	2	653.337	1305.67	1305.67	-0.68	-0.00044	HCD (High Energy Collision Dissociation)	MS2	23.4224	25	43.1415	34313	MS201900090_4_PKA.raw	F4		30	46	39	0.486782	0.0001341	0.001233	2.07984e+06	43.32
		FALSE	High	Mascot (A5)	Unambiguous	[K].EQADFAIEALAK.[A]		1	1	P35579	P35579	0	2	0	0	1	1	653.337	1305.67	1305.67	-0.68	-0.00044	HCD (High Energy Collision Dissociation)	MS2	23.4224	25	43.1415	34313	MS201900090_4_PKA.raw	F4		30	46	39	0.486782	0.0001341	0.001233	2.07984e+06	43.32
		FALSE	High	Mascot (A5)	Unambiguous	[K].EQADFALEALAK.[A]		1	1	Q7Z406	Q7Z406	0	2		0	1	2	653.337	1305.67	1305.67	-0.73	-0.00048	HCD (High Energy Collision Dissociation)	MS2	39.3324	25	67.0023	60766	MS201900090_4_PKA.raw	F4		18	46	39	6.97831	0.0001341	0.001054
		FALSE	High	Mascot (A5)	Unambiguous	[K].EQADFAIEALAK.[A]		1	1	P35579	P35579	0	2	0	0	1	1	653.337	1305.67	1305.67	-0.73	-0.00048	HCD (High Energy Collision Dissociation)	MS2	39.3324	25	67.0023	60766	MS201900090_4_PKA.raw	F4		18	46	39	6.97831	0.0001341	0.001054
		FALSE	High	Mascot (A5)	Unambiguous	[K].EQADFALEALAK.[A]		1	1	Q7Z406	Q7Z406	0	2		0	1	2	653.337	1305.67	1305.67	-1.13	-0.00074	HCD (High Energy Collision Dissociation)	MS2	26.4422	25	41.7224	32728	MS201900090_4_PKA.raw	F4		38	46	39	0.0697825	0.0001341	0.001952	7.24014e+06	41.36
		FALSE	High	Mascot (A5)	Unambiguous	[K].EQADFALEALAK.[A]		1	1	Q7Z406	Q7Z406	0	2		0	1	2	653.337	1305.67	1305.67	-1.38	-0.0009	HCD (High Energy Collision Dissociation)	MS2	49.6055	25	45.5011	36758	MS201900090_4_PKA.raw	F4		16	46	39	10.1225	0.0001341	0.002834
		FALSE	High	Mascot (A5)	Unambiguous	[K].EQADFAIEALAK.[A]		1	1	P35579	P35579	0	2	0	0	1	1	653.337	1305.67	1305.67	-1.38	-0.0009	HCD (High Energy Collision Dissociation)	MS2	49.6055	25	45.5011	36758	MS201900090_4_PKA.raw	F4		16	46	39	10.1225	0.0001341	0.002834
		FALSE	High	Mascot (A5)	Unambiguous	[K].EQADFAIEALAK.[A]		1	1	P35579	P35579	0	2	0	0	1	1	653.337	1305.67	1305.67	-1.81	-0.00118	HCD (High Energy Collision Dissociation)	MS2	45.6555	25	70.5165	64822	MS201900090_4_PKA.raw	F4		18	46	39	7.53406	0.0001341	0.001021
		FALSE	High	Mascot (A5)	Unambiguous	[K].EQADFALEALAK.[A]		1	1	Q7Z406	Q7Z406	0	2		0	1	2	653.337	1305.67	1305.67	-1.81	-0.00118	HCD (High Energy Collision Dissociation)	MS2	45.6555	25	70.5165	64822	MS201900090_4_PKA.raw	F4		18	46	39	7.53406	0.0001341	0.001021
		FALSE	High	Mascot (A5)	Unambiguous	[K].EQADFAIEALAK.[A]		1	1	P35579	P35579	0	2	0	0	1	1	653.337	1305.67	1305.67	-1.13	-0.00074	HCD (High Energy Collision Dissociation)	MS2	26.4422	25	41.7224	32728	MS201900090_4_PKA.raw	F4		38	46	39	0.0697825	0.0001341	0.001952	7.24014e+06	41.36
		FALSE	High	Mascot (A5)	Unambiguous	[K].EQADFAIEALAK.[A]		1	1	P35579	P35579	0	2	0	0	1	1	653.339	1305.67	1305.67	2.29	0.00149	HCD (High Energy Collision Dissociation)	MS2	13.276	25	42.1496	33189	MS201900090_4_PKA.raw	F4		38	46	39	0.0654986	0.0001341	0.002105	7.24014e+06	41.36
[truncated: 43,320 more rows]

## Sheet: Proteins(TGF-β1)
Checked	Protein FDR Confidence: Combined	Master	Accession	Description	Exp. q-value: Combined	Sum PEP Score	Coverage [%]	# Peptides	# PSMs	# Unique Peptides	# Protein Groups	# AAs	MW [kDa]	calc. pI	Score Mascot: Mascot	# Peptides (by Search Engine): Mascot	# Razor Peptides	Abundances (Scaled): F2: Sample	Found in Sample: [S2] F2: Sample	Modifications
[truncated: 21,049 more rows]
