# Supplementary material for: Ursodeoxycholic acid breaks antitumor immunosuppression by inducing CHIP-mediated TGF-β degradation
Source: Research Square preprint supplement (doi:10.21203/rs.3.rs-845862/v1), 2021-09-10
Supplement: Supplementary file 6 [file 31a21c46024d75290d07d72d.docx]

| **Supplementary Table 6: The antibodies for flow cytometry and immunoblotting.** | | |
| --- | --- | --- |
| **Antibodies** | Source | Identifier |
| **fixable viability dye eFluorTM 450** | ThermoFisher | 65-0863-14 |
| **fixable viability dye eFluorTM 520** | ThermoFisher | 65-0867-14 |
| **PB anti-CD45** | BioLegend | 30-F11 |
| **PE-cy5 anti-CD19** | BioLegend | 115510 |
| **PE anti-CD4** | ThermoFisher | 12-0041-82 |
| **APC anti-CD8** | BioLegend | 100712 |
| **APC anti-CD11c** | BioLegend | 117310 |
| **PE anti-MHC II** | ThermoFisher | 12-5321-82 |
| **PE anti-CD11b** | ThermoFisher | 12-0112-83 |
| **APC anti-F4/80** | BioLegend | 123115 |
| **APC anti-CD3** | BioLegend | 100235 |
| **PE anti-NK1.1** | BioLegend | 108707 |
| **APC anti-Foxp3** | ThermoFisher | 17-5773-82 |
| **APC anti-Gr1** | ThermoFisher | 17-5931-82 |
| **PE anti-human/mouse Ki-67** | BioLegend | 151209 |
| **PE anti-mouse CD152 (CTLA4)** | BioLegend | 106305 |
| **PE anti-mouse CD278 (ICOS)** | ThermoFisher | 12-9942-81 |
| **PE anti-human CD152 (CTLA4)** | BioLegend | 369603 |
| **PE anti-human CD357 (GITR)** | ThermoFisher | 12-5875-41 |
| **PE anti-TGF-1/-2/-3** | R&D | IC1835P |
| **PE anti-CD25** | ThermoFisher | 12-0251-83 |
| **APC anti-CD44** | ThermoFisher | 17-0441-83 |
| **PE anti-CD62L** | ThermoFisher | 12-0621-82 |
| **FITC anti-CD25** | BioLegend | 101907 |
| **Pacific Blue anti-CD4** | ThermoFisher | MCD0428 |
| **PE anti-CD8** | ThermoFisher | 12-0081-85 |
| **APC anti-IFN-γ** | ThermoFisher | 17-7311-82 |
| **APC-cy7 anti-CD4** | BioLegend | 100526 |
| **PB anti-CD4** | BioLegend | 100428 |
| **APC-cy7 anti-CD8** | BioLegend | 100713 |
| **PE anti-human CD4** | ThermoFisher | 12-0047-41 |
| **FITC anti-human CD4** | ThermoFisher | 11-0048-42 |
| **APC anti-human Foxp3** | ThermoFisher | 17-4777-42 |
| **TGFbeta1** | Cell Signaling | 3711 |
| **β-Actin** | Cell Signaling | 3700 |
| **p-Smad3** | Cell Signaling | 9520 |
| **Smad3** | Cell Signaling | 9523 |
| **p-PKA** | abcam | ab75991 |
| **PKA** | abcam | ab76238 |
| **LC3B** | Invitrogen | MA5-37852 |
| **K48-UB** | Cell Signaling | 12805 |
| **K63-UB** | Cell Signaling | 12930 |
| **UB** | Cell Signaling | 3936 |
| **CHIP** | abcam | ab228742 |
| **Flag** | Cell Signaling | 14793 |
| **His** | Cell Signaling | 12698 |
| **Myc** | Cell Signaling | 2276 |
| **HA** | Cell Signaling | 3724 |
| **p-Ser/Thr** | Cell Signaling | 9631 |

| **Supplementary Table 7: Primers for real-time PCR** | |
| --- | --- |
| **Gene** | Primers |
| ***mActb* F** | 5’-CGTTGACATCCGTAAAGACC-3’ |
| ***mActb* R** | 5’-AACAGTCCGCCTAGAAGCAC-3’ |
| ***mFoxp3* F** | 5’-CTCGTCTGAAGGCAGAGTCA-3’ |
| ***mFoxp3* R** | 5’-TGGCAGAGAGGTATTGAGGG-3’ |
| ***mTgfb1* F** | 5’-TGATACGCCTGAGTGGCTGTCT-3’ |
| ***mTgfb1* R** | 5’-CACAAGAGCAGTGAGCGCTGAA-3’ |
| ***mTgfbr1* F** | 5’-TGCTCCAAACCACAGAGTAGGC-3’ |
| ***mTgfbr1* R** | 5’-CCCAGAACACTAAGCCCATTGC-3’ |
| ***mTgfbr2* F** | 5’-CCTACTCTGTCTGTGGATGACC-3’ |
| ***mTgfbr2* R** | 5’-GACATCCGTCTGCTTGAACGAC-3’ |
| ***mSmad7* F** | 5’-GTCCAGATGCTGTACCTTCCTC-3’ |
| ***mSmad7* R** | 5’-GCGAGTCTTCTCCTCCCAGTAT-3’ |
| ***mFos* F** | 5’-GGGAATGGTGAAGACCGTGTCA-3’ |
| ***mFos* R** | 5’-GCAGCCATCTTATTCCGTTCCC-3’ |
| **#1 sgRNA for *Chip*** | 5’-AGTCAGCAAGTGCCTGTTCAGG-3’ |
| **#2 sgRNA for *Chip*** | 5’-GGCAGTGTACTACACTAACCGG-3’ |
