# Supplementary material for: Ursodeoxycholic acid breaks antitumor immunosuppression by inducing CHIP-mediated TGF-β degradation
Source: Research Square preprint supplement (doi:10.21203/rs.3.rs-845862/v1), 2021-09-10
Supplement: Supplementary file 7 [file 5cc4559bd5d4d0c588b075fc.xlsx]

## Sheet: Proteins(Control)
Checked	Protein FDR Confidence: Combined	Master	Accession	Description	Exp. q-value: Combined	Sum PEP Score	Coverage [%]	# Peptides	# PSMs	# Unique Peptides	# Protein Groups	# AAs	MW [kDa]	calc. pI	Score Mascot: Mascot	# Peptides (by Search Engine): Mascot	Biological Process	Cellular Component	Molecular Function	Pfam IDs	Entrez Gene ID	Ensembl Gene ID	Gene Symbol	Chromosome	WikiPathways	KEGG Pathways	# Razor Peptides	Abundances (Scaled): F1: Sample	Found in Sample: [S1] F1: Sample	Modifications
FALSE	High	Master Protein	P20152	Vimentin OS=Mus musculus OX=10090 GN=Vim PE=1 SV=3	0	133.831	53	29	72	28	1	466	53.7	5.12	1714	29	cell differentiation;cell organization and biogenesis;metabolic process;regulation of biological process;response to stimulus	cytoplasm;cytoskeleton;cytosol;membrane	protein binding;RNA binding;structural molecule activity	Pf00038, Pf04111, Pf04156, Pf04732, Pf05622, Pf10186	22352	ENSMUSG00000026728.9	Vim	2	Alpha6-Beta4 Integrin Signaling Pathway; Spinal Cord Injury; Striated Muscle Contraction; Primary Focal Segmental Glomerulosclerosis FSGS	MicroRNAs in cancer; Epstein-Barr virus infection	2	100	High	Phospho [S325]
	Checked	Confidence	Annotated Sequence	Modifications	Modifications in Master Proteins	Qvality PEP	Qvality q-value	# Protein Groups	# Proteins	# PSMs	Master Protein Accessions	Positions in Master Proteins	# Missed Cleavages	Theo. MH+ [Da]	# Razor Quan Results	Abundances (Scaled): F1: Sample	Quan Info	Found in Sample: [S1] F1: Sample	Confidence (by Search Engine): Mascot	Percolator q-Value (by Search Engine): Mascot	Percolator PEP (by Search Engine): Mascot	Ions Score (by Search Engine): Mascot	Top Apex RT [min]	Sequence in Protein	Positions in Protein	Peptide Group Modifications in Protein	Quan Usage
	FALSE	High	[R].QVQSLTCEVDALKGTNESLER.[Q]	1xPhospho [S4]	P20152 1xPhospho [S325]	0.00197831	0	1	1	1	P20152	P20152 [322-342]	1	2400.11	0	100		High	High	0	0.001541	46	44	R.QVQSLTCEVDALKGTNESLER.Q	[322-342]	1xPhospho [S325]	Used
		Checked	Confidence	Identifying Node	PSM Ambiguity	Annotated Sequence	Modifications	# Protein Groups	# Proteins	Master Protein Accessions	Protein Accessions	# Missed Cleavages	Charge	DeltaScore	DeltaCn	Rank	Search Engine Rank	m/z [Da]	MH+ [Da]	Theo. MH+ [Da]	DeltaM [ppm]	Deltam/z [Da]	Activation Type	MS Order	Isolation Interference [%]	Ion Inject Time [ms]	RT [min]	First Scan	Spectrum File	File ID	Quan Info	Ions Score	Identity Strict	Identity Relaxed	Expectation Value	Percolator q-Value	Percolator PEP	Precursor Abundance	Apex RT [min]
		FALSE	High	Mascot (A5)	Unambiguous	[R].QVQsLTCEVDALKGTNESLER.[Q]	S4(Phospho)	1	1	P20152	P20152	1	2	0.1304	0	1	1	1200.56	2400.12	2400.11	3.11	0.00373	HCD (High Energy Collision Dissociation)	MS2	0	25	44.0222	29552	MS201900102_Con1.raw	F1		46	46	39	0.0109357	0	0.001541	382381	44
	FALSE	High	[R].QVQSLTCEVDALK.[G]			0.000615767	0	1	1	1	P20152	P20152 [322-334]	0	1433.73	0		No Quan Values	High	High	0	0.00046	49		R.QVQSLTCEVDALK.G	[322-334]		Not Used
		Checked	Confidence	Identifying Node	PSM Ambiguity	Annotated Sequence	Modifications	# Protein Groups	# Proteins	Master Protein Accessions	Protein Accessions	# Missed Cleavages	Charge	DeltaScore	DeltaCn	Rank	Search Engine Rank	m/z [Da]	MH+ [Da]	Theo. MH+ [Da]	DeltaM [ppm]	Deltam/z [Da]	Activation Type	MS Order	Isolation Interference [%]	Ion Inject Time [ms]	RT [min]	First Scan	Spectrum File	File ID	Quan Info	Ions Score	Identity Strict	Identity Relaxed	Expectation Value	Percolator q-Value	Percolator PEP	Precursor Abundance	Apex RT [min]
		FALSE	High	Mascot (A5)	Unambiguous	[R].QVQSLTCEVDALK.[G]		1	1	P20152	P20152	0	2	1	0	1	1	717.377	1433.75	1433.73	10.69	0.00766	HCD (High Energy Collision Dissociation)	MS2	36.4179	25	43.7558	29233	MS201900102_Con1.raw	F1		49	41	34	0.00149362	0	0.00046
	FALSE	High	[R].KVESLQEEIAFLK.[K]			7.41224e-08	0	1	1	3	P20152	P20152 [223-235]	1	1533.85	0	100		High	High	0	4.103e-08	102	39.81	R.KVESLQEEIAFLK.K	[223-235]		Used
		Checked	Confidence	Identifying Node	PSM Ambiguity	Annotated Sequence	Modifications	# Protein Groups	# Proteins	Master Protein Accessions	Protein Accessions	# Missed Cleavages	Charge	DeltaScore	DeltaCn	Rank	Search Engine Rank	m/z [Da]	MH+ [Da]	Theo. MH+ [Da]	DeltaM [ppm]	Deltam/z [Da]	Activation Type	MS Order	Isolation Interference [%]	Ion Inject Time [ms]	RT [min]	First Scan	Spectrum File	File ID	Quan Info	Ions Score	Identity Strict	Identity Relaxed	Expectation Value	Percolator q-Value	Percolator PEP	Precursor Abundance	Apex RT [min]
		FALSE	High	Mascot (A5)	Unambiguous	[R].KVESLQEEIAFLK.[K]		1	1	P20152	P20152	1	2	1	0	1	1	767.437	1533.87	1533.85	9.11	0.00699	HCD (High Energy Collision Dissociation)	MS2	3.25853	6.273	39.9634	24790	MS201900102_Con1.raw	F1		102	36	29	2.98991e-09	0	4.103e-08	114593992	39.81
		FALSE	High	Mascot (A5)	Unambiguous	[R].KVESLQEEIAFLK.[K]		1	1	P20152	P20152	1	2	0.9529	0	1	1	767.437	1533.87	1533.85	9.11	0.00699	HCD (High Energy Collision Dissociation)	MS2	0	25	39.5096	24249	MS201900102_Con1.raw	F1		85	36	29	1.32635e-07	0	6.421e-07	114593992	39.81
		FALSE	High	Mascot (A5)	Unambiguous	[R].KVESLQEEIAFLK.[K]		1	1	P20152	P20152	1	2	1	0	1	1	767.437	1533.87	1533.85	8.79	0.00674	HCD (High Energy Collision Dissociation)	MS2	64.9716	25	40.4426	25368	MS201900102_Con1.raw	F1		56	36	29	0.000108048	0.0004707	0.01262	730018	40.42
	FALSE	High	[R].KVESLQEEIAFLKK.[L]			0.00161166	0	1	1	1	P20152	P20152 [223-236]	2	1661.95	0		No Quan Values	High	High	0	0.001248	73		R.KVESLQEEIAFLKK.L	[223-236]		Not Used
		Checked	Confidence	Identifying Node	PSM Ambiguity	Annotated Sequence	Modifications	# Protein Groups	# Proteins	Master Protein Accessions	Protein Accessions	# Missed Cleavages	Charge	DeltaScore	DeltaCn	Rank	Search Engine Rank	m/z [Da]	MH+ [Da]	Theo. MH+ [Da]	DeltaM [ppm]	Deltam/z [Da]	Activation Type	MS Order	Isolation Interference [%]	Ion Inject Time [ms]	RT [min]	First Scan	Spectrum File	File ID	Quan Info	Ions Score	Identity Strict	Identity Relaxed	Expectation Value	Percolator q-Value	Percolator PEP	Precursor Abundance	Apex RT [min]
		FALSE	High	Mascot (A5)	Unambiguous	[R].KVESLQEEIAFLKK.[L]		1	1	P20152	P20152	2	2	1	0	1	1	831.483	1661.96	1661.95	6.87	0.00571	HCD (High Energy Collision Dissociation)	MS2	54.375	25	32.8381	17517	MS201900102_Con1.raw	F1		73	34	27	1.37575e-06	0	0.001248	4827677	32.95
	FALSE	High	[R].LLQDSVDFSLADAINTEFK.[N]			2.78961e-07	0	1	1	10	P20152	P20152 [79-97]	0	2126.07	0	100		High	High	0	3.114e-07	80	68.2	R.LLQDSVDFSLADAINTEFK.N	[79-97]		Used
		Checked	Confidence	Identifying Node	PSM Ambiguity	Annotated Sequence	Modifications	# Protein Groups	# Proteins	Master Protein Accessions	Protein Accessions	# Missed Cleavages	Charge	DeltaScore	DeltaCn	Rank	Search Engine Rank	m/z [Da]	MH+ [Da]	Theo. MH+ [Da]	DeltaM [ppm]	Deltam/z [Da]	Activation Type	MS Order	Isolation Interference [%]	Ion Inject Time [ms]	RT [min]	First Scan	Spectrum File	File ID	Quan Info	Ions Score	Identity Strict	Identity Relaxed	Expectation Value	Percolator q-Value	Percolator PEP	Precursor Abundance	Apex RT [min]
		FALSE	High	Mascot (A5)	Unambiguous	[R].LLQDSVDFSLADAINTEFK.[N]		1	1	P20152	P20152	0	2	1	0	1	1	1063.55	2126.08	2126.07	9.09	0.00966	HCD (High Energy Collision Dissociation)	MS2	0	22.786	68.0808	50693	MS201900102_Con1.raw	F1		80	42	35	1.88465e-06	0	3.114e-07	28212430	68.2
		FALSE	High	Mascot (A5)	Unambiguous	[R].LLQDSVDFSLADAINTEFK.[N]		1	1	P20152	P20152	0	2	0.9787	0	1	1	1063.54	2126.07	2126.07	4.61	0.0049	HCD (High Energy Collision Dissociation)	MS2	57.5943	25	74.4805	57975	MS201900102_Con1.raw	F1		47	43	36	0.00392468	0	0.001551
		FALSE	High	Mascot (A5)	Unambiguous	[R].LLQDSVDFSLADAINTEFK.[N]		1	1	P20152	P20152	0	2	1	0	1	1	1063.54	2126.07	2126.07	4.27	0.00454	HCD (High Energy Collision Dissociation)	MS2	0	25	69.9343	52794	MS201900102_Con1.raw	F1	Not Reliable	36	43	36	0.0588599	0	0.0002065
		FALSE	High	Mascot (A5)	Unambiguous	[R].LLQDSVDFSLADAINTEFK.[N]		1	1	P20152	P20152	0	2	1	0	1	1	1063.55	2126.09	2126.07	10.01	0.01064	HCD (High Energy Collision Dissociation)	MS2	0	10.866	68.5428	51213	MS201900102_Con1.raw	F1		79	42	35	2.22394e-06	0	1.613e-07	28212430	68.2
		FALSE	High	Mascot (A5)	Unambiguous	[R].LLQDSVDFSLADAINTEFK.[N]		1	1	P20152	P20152	0	2	1	0	1	1	1063.55	2126.09	2126.07	12.08	0.01284	HCD (High Energy Collision Dissociation)	MS2	0	25	68.9831	51700	MS201900102_Con1.raw	F1		77	42	35	3.41349e-06	0	8.373e-06	28212430	68.2
		FALSE	High	Mascot (A5)	Unambiguous	[R].LLQDSVDFSLADAINTEFK.[N]		1	1	P20152	P20152	0	3	0.9286	0	1	1	709.369	2126.09	2126.07	12.33	0.00874	HCD (High Energy Collision Dissociation)	MS2	75.4418	25	72.1929	55369	MS201900102_Con1.raw	F1		14	42	35	7.76037	0.0004707	0.002812
		FALSE	High	Mascot (A5)	Unambiguous	[R].LLQDSVDFSLADAINTEFK.[N]		1	1	P20152	P20152	0	2	1	0	1	1	1063.55	2126.09	2126.07	11.26	0.01197	HCD (High Energy Collision Dissociation)	MS2		25	71.388	54439	MS201900102_Con1.raw	F1		14	42	35	7.07245	0.0004707	0.02263
		FALSE	High	Mascot (A5)	Unambiguous	[R].LLQDSVDFSLADAINTEFK.[N]		1	1	P20152	P20152	0	2	1	0	1	1	1063.54	2126.08	2126.07	5.65	0.006	HCD (High Energy Collision Dissociation)	MS2	62.6156	25	73.5221	56916	MS201900102_Con1.raw	F1		16	43	36	5.81628	0.001254	0.05676
		FALSE	High	Mascot (A5)	Unambiguous	[R].LLQDSVDFSLADAINTEFK.[N]		1	1	P20152	P20152	0	2	1	0	1	1	1063.54	2126.08	2126.07	6.45	0.00686	HCD (High Energy Collision Dissociation)	MS2	0	25	73.9937	57448	MS201900102_Con1.raw	F1		30	43	36	0.2054	0.001254	0.05966
		FALSE	High	Mascot (A5)	Unambiguous	[R].LLQDSVDFSLADAINTEFK.[N]		1	1	P20152	P20152	0	2	0.9048	0	1	1	1063.55	2126.08	2126.07	8.86	0.00942	HCD (High Energy Collision Dissociation)	MS2	0	25	74.926	58419	MS201900102_Con1.raw	F1		42	42	35	0.0115414	0.002413	0.08708
	FALSE	High	[R].ISLPLPTFSSLNLR.[E]			0.000127796	0	1	1	2	P20152	P20152 [411-424]	0	1557.9	0	100		High	High	0	9.095e-05	60	62.59	R.ISLPLPTFSSLNLR.E	[411-424]		Used
		Checked	Confidence	Identifying Node	PSM Ambiguity	Annotated Sequence	Modifications	# Protein Groups	# Proteins	Master Protein Accessions	Protein Accessions	# Missed Cleavages	Charge	DeltaScore	DeltaCn	Rank	Search Engine Rank	m/z [Da]	MH+ [Da]	Theo. MH+ [Da]	DeltaM [ppm]	Deltam/z [Da]	Activation Type	MS Order	Isolation Interference [%]	Ion Inject Time [ms]	RT [min]	First Scan	Spectrum File	File ID	Quan Info	Ions Score	Identity Strict	Identity Relaxed	Expectation Value	Percolator q-Value	Percolator PEP	Precursor Abundance	Apex RT [min]
		FALSE	High	Mascot (A5)	Unambiguous	[R].ISLPLPTFSSLNLR.[E]		1	1	P20152	P20152	0	2	1	0	1	1	779.461	1557.91	1557.9	9.28	0.00722	HCD (High Energy Collision Dissociation)	MS2	5.48192	25	62.5864	45242	MS201900102_Con1.raw	F1		60	33	26	2.50621e-05	0	9.095e-05	1.49626e+06	62.59
		FALSE	High	Mascot (A5)	Unambiguous	[R].ISLPLPTFSSLNLR.[E]		1	1	P20152	P20152	0	2	1	0	1	1	779.463	1557.92	1557.9	12.41	0.00967	HCD (High Energy Collision Dissociation)	MS2	32.2378	25	62.3818	45018	MS201900102_Con1.raw	F1		25	32	25	0.0614124	0.0004707	0.008648	1.49626e+06	62.59
	FALSE	High	[R].LQDEIQNMKEEMAR.[H]			3.54161e-05	0	1	1	1	P20152	P20152 [365-378]	1	1734.81	0	100		High	High	0	2.405e-05	48	28.64	R.LQDEIQNMKEEMAR.H	[365-378]		Used
		Checked	Confidence	Identifying Node	PSM Ambiguity	Annotated Sequence	Modifications	# Protein Groups	# Proteins	Master Protein Accessions	Protein Accessions	# Missed Cleavages	Charge	DeltaScore	DeltaCn	Rank	Search Engine Rank	m/z [Da]	MH+ [Da]	Theo. MH+ [Da]	DeltaM [ppm]	Deltam/z [Da]	Activation Type	MS Order	Isolation Interference [%]	Ion Inject Time [ms]	RT [min]	First Scan	Spectrum File	File ID	Quan Info	Ions Score	Identity Strict	Identity Relaxed	Expectation Value	Percolator q-Value	Percolator PEP	Precursor Abundance	Apex RT [min]
		FALSE	High	Mascot (A5)	Unambiguous	[R].LQDEIQNMKEEMAR.[H]		1	1	P20152	P20152	1	3	1	0	1	1	578.947	1734.83	1734.81	6.57	0.0038	HCD (High Energy Collision Dissociation)	MS2	54.7981	17.207	28.4871	13823	MS201900102_Con1.raw	F1		48	43	36	0.00402437	0	2.405e-05	36964640	28.64
	FALSE	High	[R].LQDEIQNMKEEMAR.[H]	1xOxidation [M]		0.000345298	0	1	1	3	P20152	P20152 [365-378]	1	1750.81	0	100		High	High	0	0.0002532	75	18.91	R.LQDEIQNMKEEMAR.H	[365-378]		Used
		Checked	Confidence	Identifying Node	PSM Ambiguity	Annotated Sequence	Modifications	# Protein Groups	# Proteins	Master Protein Accessions	Protein Accessions	# Missed Cleavages	Charge	DeltaScore	DeltaCn	Rank	Search Engine Rank	m/z [Da]	MH+ [Da]	Theo. MH+ [Da]	DeltaM [ppm]	Deltam/z [Da]	Activation Type	MS Order	Isolation Interference [%]	Ion Inject Time [ms]	RT [min]	First Scan	Spectrum File	File ID	Quan Info	Ions Score	Identity Strict	Identity Relaxed	Expectation Value	Percolator q-Value	Percolator PEP	Precursor Abundance	Apex RT [min]
		FALSE	High	Mascot (A5)	Unambiguous	[R].LQDEIQNmKEEMAR.[H]	M8(Oxidation)	1	1	P20152	P20152	1	2	0.52	0	1	1	875.912	1750.82	1750.81	4.26	0.00373	HCD (High Energy Collision Dissociation)	MS2	54.8007	16.536	16.8862	6192	MS201900102_Con1.raw	F1		75	43	36	8.11216e-06	0	0.0002532	12847598	16.9
		FALSE	High	Mascot (A5)	Unambiguous	[R].LQDEIQNMKEEmAR.[H]	M12(Oxidation)	1	1	P20152	P20152	1	2	0.5862	0	1	1	875.916	1750.83	1750.81	8.66	0.00758	HCD (High Energy Collision Dissociation)	MS2	0	25	18.5987	7891	MS201900102_Con1.raw	F1		58	43	36	0.000377746	0.0004707	0.001913	5090524	18.74
		FALSE	High	Mascot (A5)	Unambiguous	[R].LQDEIQNMKEEmAR.[H]	M12(Oxidation)	1	1	P20152	P20152	1	3	0.3871	0	1	1	584.279	1750.82	1750.81	7.81	0.00456	HCD (High Energy Collision Dissociation)	MS2	8.56667	16.504	19.0604	8442	MS201900102_Con1.raw	F1		31	43	37	0.191761	0.0004707	0.00281	9153751	18.91
	FALSE	High	[R].LQDEIQNMKEEMAR.[H]	2xOxidation [M8; M12]		5.22666e-05	0	1	1	1	P20152	P20152 [365-378]	1	1766.8	0	100		High	High	0	3.596e-05	37	15.24	R.LQDEIQNMKEEMAR.H	[365-378]		Used
		Checked	Confidence	Identifying Node	PSM Ambiguity	Annotated Sequence	Modifications	# Protein Groups	# Proteins	Master Protein Accessions	Protein Accessions	# Missed Cleavages	Charge	DeltaScore	DeltaCn	Rank	Search Engine Rank	m/z [Da]	MH+ [Da]	Theo. MH+ [Da]	DeltaM [ppm]	Deltam/z [Da]	Activation Type	MS Order	Isolation Interference [%]	Ion Inject Time [ms]	RT [min]	First Scan	Spectrum File	File ID	Quan Info	Ions Score	Identity Strict	Identity Relaxed	Expectation Value	Percolator q-Value	Percolator PEP	Precursor Abundance	Apex RT [min]
		FALSE	High	Mascot (A5)	Unambiguous	[R].LQDEIQNmKEEmAR.[H]	M8(Oxidation); M12(Oxidation)	1	1	P20152	P20152	1	3	1	0	1	1	589.612	1766.82	1766.8	9.24	0.00544	HCD (High Energy Collision Dissociation)	MS2	0.585273	17.153	15.2397	4861	MS201900102_Con1.raw	F1		37	44	37	0.0545909	0	3.596e-05	18058688	15.24
	FALSE	High	[R].LQDEIQNMKEEMAR.[H]	1xAcetyl [N-Term]	P20152 1xAcetyl [N-Term]	0.000171563	0	1	1	1	P20152	P20152 [365-378]	1	1776.83	0		No Quan Values	High	High	0	0.0001233	49		R.LQDEIQNMKEEMAR.H	[365-378]	1xAcetyl [N-Term]	Not Used
		Checked	Confidence	Identifying Node	PSM Ambiguity	Annotated Sequence	Modifications	# Protein Groups	# Proteins	Master Protein Accessions	Protein Accessions	# Missed Cleavages	Charge	DeltaScore	DeltaCn	Rank	Search Engine Rank	m/z [Da]	MH+ [Da]	Theo. MH+ [Da]	DeltaM [ppm]	Deltam/z [Da]	Activation Type	MS Order	Isolation Interference [%]	Ion Inject Time [ms]	RT [min]	First Scan	Spectrum File	File ID	Quan Info	Ions Score	Identity Strict	Identity Relaxed	Expectation Value	Percolator q-Value	Percolator PEP	Precursor Abundance	Apex RT [min]
		FALSE	High	Mascot (A5)	Unambiguous	[R].lQDEIQNMKEEMAR.[H]	N-Term(Acetyl)	1	1	P20152	P20152	1	2	1	0	1	1	888.923	1776.84	1776.83	7.83	0.00695	HCD (High Energy Collision Dissociation)	MS2	0	25	36.6833	20950	MS201900102_Con1.raw	F1		49	44	37	0.00321599	0	0.0001233	775826	36.73
	FALSE	High	[K].MALDIEIATYR.[K]	1xOxidation [M1]		0.000379581	0	1	2	3	P20152	P20152 [391-401]	0	1311.66	0	100		High	High	0	0.0002796	46	38.43	K.MALDIEIATYR.K	[391-401]		Used
		Checked	Confidence	Identifying Node	PSM Ambiguity	Annotated Sequence	Modifications	# Protein Groups	# Proteins	Master Protein Accessions	Protein Accessions	# Missed Cleavages	Charge	DeltaScore	DeltaCn	Rank	Search Engine Rank	m/z [Da]	MH+ [Da]	Theo. MH+ [Da]	DeltaM [ppm]	Deltam/z [Da]	Activation Type	MS Order	Isolation Interference [%]	Ion Inject Time [ms]	RT [min]	First Scan	Spectrum File	File ID	Quan Info	Ions Score	Identity Strict	Identity Relaxed	Expectation Value	Percolator q-Value	Percolator PEP	Precursor Abundance	Apex RT [min]
		FALSE	High	Mascot (A5)	Unambiguous	[K].mALDIEIATYR.[K]	M1(Oxidation)	1	2	P20152	P15331; P20152	0	2	0.9565	0	1	1	656.338	1311.67	1311.66	5.95	0.0039	HCD (High Energy Collision Dissociation)	MS2	86.0485	25	38.1244	22651	MS201900102_Con1.raw	F1		46	40	33	0.0030024	0	0.0002796	4860323	38.43
		FALSE	High	Mascot (A5)	Unambiguous	[K].mALDIEIATYR.[K]	M1(Oxidation)	1	2	P20152	P15331; P20152	0	2	1	0	1	1	656.339	1311.67	1311.66	6.79	0.00445	HCD (High Energy Collision Dissociation)	MS2	92.8036	25	39.0329	23679	MS201900102_Con1.raw	F1		32	40	33	0.0811477	0.0004707	0.003026	4860323	38.43
		FALSE	High	Mascot (A5)	Unambiguous	[K].mALDIEIATYR.[K]	M1(Oxidation)	1	2	P20152	P15331; P20152	0	2	1	0	1	1	656.34	1311.67	1311.66	9.02	0.00591	HCD (High Energy Collision Dissociation)	MS2	90.9642	8.734	38.5547	23142	MS201900102_Con1.raw	F1		4	40	33	47.0852	0.001254	0.04922	4860323	38.43
	FALSE	High	[K].MALDIEIATYR.[K]			0.00103088	0	1	2	1	P20152	P20152 [391-401]	0	1295.67	0	100		High	High	0	0.0007844	38	46.23	K.MALDIEIATYR.K	[391-401]		Used
		Checked	Confidence	Identifying Node	PSM Ambiguity	Annotated Sequence	Modifications	# Protein Groups	# Proteins	Master Protein Accessions	Protein Accessions	# Missed Cleavages	Charge	DeltaScore	DeltaCn	Rank	Search Engine Rank	m/z [Da]	MH+ [Da]	Theo. MH+ [Da]	DeltaM [ppm]	Deltam/z [Da]	Activation Type	MS Order	Isolation Interference [%]	Ion Inject Time [ms]	RT [min]	First Scan	Spectrum File	File ID	Quan Info	Ions Score	Identity Strict	Identity Relaxed	Expectation Value	Percolator q-Value	Percolator PEP	Precursor Abundance	Apex RT [min]
		FALSE	High	Mascot (A5)	Unambiguous	[K].MALDIEIATYR.[K]		1	2	P20152	P15331; P20152	0	2	0.8158	0	1	1	648.342	1295.68	1295.67	7.37	0.00478	HCD (High Energy Collision Dissociation)	MS2	0	25	46.1196	31846	MS201900102_Con1.raw	F1		38	40	33	0.0185622	0	0.0007844	2860316	46.23
	FALSE	High	[R].QDVDNASLAR.[L]			0.000155248	0	1	1	1	P20152	P20152 [208-217]	0	1088.53	0	100		High	High	0	0.000111	73	15.71	R.QDVDNASLAR.L	[208-217]		Used
		Checked	Confidence	Identifying Node	PSM Ambiguity	Annotated Sequence	Modifications	# Protein Groups	# Proteins	Master Protein Accessions	Protein Accessions	# Missed Cleavages	Charge	DeltaScore	DeltaCn	Rank	Search Engine Rank	m/z [Da]	MH+ [Da]	Theo. MH+ [Da]	DeltaM [ppm]	Deltam/z [Da]	Activation Type	MS Order	Isolation Interference [%]	Ion Inject Time [ms]	RT [min]	First Scan	Spectrum File	File ID	Quan Info	Ions Score	Identity Strict	Identity Relaxed	Expectation Value	Percolator q-Value	Percolator PEP	Precursor Abundance	Apex RT [min]
		FALSE	High	Mascot (A5)	Unambiguous	[R].QDVDNASLAR.[L]		1	1	P20152	P20152	0	2	0.8493	0	1	1	544.775	1088.54	1088.53	8.46	0.0046	HCD (High Energy Collision Dissociation)	MS2	10.1111	20.851	15.7155	5436	MS201900102_Con1.raw	F1		73	40	33	5.75819e-06	0	0.000111	5415590	15.71
	FALSE	High	[R].LGDLYEEEMR.[E]			0.000826611	0	1	1	1	P20152	P20152 [146-155]	0	1254.57	0	100		High	High	0	0.0006239	52	29.99	R.LGDLYEEEMR.E	[146-155]		Used
		Checked	Confidence	Identifying Node	PSM Ambiguity	Annotated Sequence	Modifications	# Protein Groups	# Proteins	Master Protein Accessions	Protein Accessions	# Missed Cleavages	Charge	DeltaScore	DeltaCn	Rank	Search Engine Rank	m/z [Da]	MH+ [Da]	Theo. MH+ [Da]	DeltaM [ppm]	Deltam/z [Da]	Activation Type	MS Order	Isolation Interference [%]	Ion Inject Time [ms]	RT [min]	First Scan	Spectrum File	File ID	Quan Info	Ions Score	Identity Strict	Identity Relaxed	Expectation Value	Percolator q-Value	Percolator PEP	Precursor Abundance	Apex RT [min]
		FALSE	High	Mascot (A5)	Unambiguous	[R].LGDLYEEEMR.[E]		1	1	P20152	P20152	0	2	0.8846	0	1	1	627.792	1254.58	1254.57	7.97	0.005	HCD (High Energy Collision Dissociation)	MS2	19.2389	8.577	29.8777	14986	MS201900102_Con1.raw	F1		52	41	34	0.00105536	0	0.0006239	67854616	29.99
	FALSE	High	[R].LGDLYEEEMR.[E]	1xOxidation [M9]		0.000572063	0	1	1	1	P20152	P20152 [146-155]	0	1270.56	0	100		High	High	0	0.0004273	52	23.5	R.LGDLYEEEMR.E	[146-155]		Used
		Checked	Confidence	Identifying Node	PSM Ambiguity	Annotated Sequence	Modifications	# Protein Groups	# Proteins	Master Protein Accessions	Protein Accessions	# Missed Cleavages	Charge	DeltaScore	DeltaCn	Rank	Search Engine Rank	m/z [Da]	MH+ [Da]	Theo. MH+ [Da]	DeltaM [ppm]	Deltam/z [Da]	Activation Type	MS Order	Isolation Interference [%]	Ion Inject Time [ms]	RT [min]	First Scan	Spectrum File	File ID	Quan Info	Ions Score	Identity Strict	Identity Relaxed	Expectation Value	Percolator q-Value	Percolator PEP	Precursor Abundance	Apex RT [min]
		FALSE	High	Mascot (A5)	Unambiguous	[R].LGDLYEEEmR.[E]	M9(Oxidation)	1	1	P20152	P20152	0	2	0.9423	0	1	1	635.789	1270.57	1270.56	7.26	0.00461	HCD (High Energy Collision Dissociation)	MS2	0	15.923	23.2457	10584	MS201900102_Con1.raw	F1		52	41	34	0.000825557	0	0.0004273	21427834	23.5
	FALSE	High	[R].LGDLYEEEMR.[E]	1xAcetyl [N-Term]	P20152 1xAcetyl [N-Term]	7.55283e-05	0	1	1	1	P20152	P20152 [146-155]	0	1296.58	0	100		High	High	0	5.264e-05	54	40.57	R.LGDLYEEEMR.E	[146-155]	1xAcetyl [N-Term]	Used
		Checked	Confidence	Identifying Node	PSM Ambiguity	Annotated Sequence	Modifications	# Protein Groups	# Proteins	Master Protein Accessions	Protein Accessions	# Missed Cleavages	Charge	DeltaScore	DeltaCn	Rank	Search Engine Rank	m/z [Da]	MH+ [Da]	Theo. MH+ [Da]	DeltaM [ppm]	Deltam/z [Da]	Activation Type	MS Order	Isolation Interference [%]	Ion Inject Time [ms]	RT [min]	First Scan	Spectrum File	File ID	Quan Info	Ions Score	Identity Strict	Identity Relaxed	Expectation Value	Percolator q-Value	Percolator PEP	Precursor Abundance	Apex RT [min]
		FALSE	High	Mascot (A5)	Unambiguous	[R].lGDLYEEEMR.[E]	N-Term(Acetyl)	1	1	P20152	P20152	0	2	0.8519	0	1	1	648.797	1296.59	1296.58	7.09	0.0046	HCD (High Energy Collision Dissociation)	MS2	55.1662	25	40.5289	25474	MS201900102_Con1.raw	F1		54	42	35	0.000582954	0	5.264e-05	676362	40.57
	FALSE	High	[K].ILLAELEQLKGQGK.[S]			3.02467e-05	0	1	1	2	P20152	P20152 [130-143]	1	1539.91	0	100		High	High	0	2.051e-05	51	37.35	K.ILLAELEQLKGQGK.S	[130-143]		Used
		Checked	Confidence	Identifying Node	PSM Ambiguity	Annotated Sequence	Modifications	# Protein Groups	# Proteins	Master Protein Accessions	Protein Accessions	# Missed Cleavages	Charge	DeltaScore	DeltaCn	Rank	Search Engine Rank	m/z [Da]	MH+ [Da]	Theo. MH+ [Da]	DeltaM [ppm]	Deltam/z [Da]	Activation Type	MS Order	Isolation Interference [%]	Ion Inject Time [ms]	RT [min]	First Scan	Spectrum File	File ID	Quan Info	Ions Score	Identity Strict	Identity Relaxed	Expectation Value	Percolator q-Value	Percolator PEP	Precursor Abundance	Apex RT [min]
		FALSE	High	Mascot (A5)	Unambiguous	[K].ILLAELEQLKGQGK.[S]		1	1	P20152	P20152	1	2	1	0	1	1	770.463	1539.92	1539.91	4.9	0.00377	HCD (High Energy Collision Dissociation)	MS2	21.3682	24.886	37.1705	21511	MS201900102_Con1.raw	F1		45	32	25	0.000616079	0	0.0003256	16184714	37.35
		FALSE	High	Mascot (A5)	Unambiguous	[K].ILLAELEQLKGQGK.[S]		1	1	P20152	P20152	1	2	1	0	1	1	770.465	1539.92	1539.91	8.55	0.00658	HCD (High Energy Collision Dissociation)	MS2	26.388	25	37.6283	22054	MS201900102_Con1.raw	F1		51	31	24	0.000123621	0	2.051e-05	16184714	37.35
	FALSE	High	[R].DGQVINETSQHHDDLE.[-]			0.000862124	0	1	1	2	P20152	P20152 [451-466]	0	1836.8	0	100		High	High	0	0.0006547	47	18.42	R.DGQVINETSQHHDDLE.-	[451-466]		Used
		Checked	Confidence	Identifying Node	PSM Ambiguity	Annotated Sequence	Modifications	# Protein Groups	# Proteins	Master Protein Accessions	Protein Accessions	# Missed Cleavages	Charge	DeltaScore	DeltaCn	Rank	Search Engine Rank	m/z [Da]	MH+ [Da]	Theo. MH+ [Da]	DeltaM [ppm]	Deltam/z [Da]	Activation Type	MS Order	Isolation Interference [%]	Ion Inject Time [ms]	RT [min]	First Scan	Spectrum File	File ID	Quan Info	Ions Score	Identity Strict	Identity Relaxed	Expectation Value	Percolator q-Value	Percolator PEP	Precursor Abundance	Apex RT [min]
		FALSE	High	Mascot (A5)	Unambiguous	[R].DGQVINETSQHHDDLE.[-]		1	1	P20152	P20152	0	2	0.9787	0	1	1	918.911	1836.81	1836.8	8.25	0.00757	HCD (High Energy Collision Dissociation)	MS2	0	25	18.303	7555	MS201900102_Con1.raw	F1		47	44	37	0.00622934	0	0.0006547	49168612	18.42
		FALSE	High	Mascot (A5)	Unambiguous	[R].DGQVINETSQHHDDLE.[-]		1	1	P20152	P20152	0	2	0.9333	0	1	1	918.912	1836.82	1836.8	9.11	0.00837	HCD (High Energy Collision Dissociation)	MS2	0	25	18.7489	8067	MS201900102_Con1.raw	F1		30	44	37	0.303941	0.001254	0.05874	49168612	18.42
	FALSE	High	[R].VEVERDNLAEDIMR.[L]			0.000293354	0	1	1	3	P20152	P20152 [171-184]	1	1688.83	0	100		High	High	0	0.0002143	27	32.29	R.VEVERDNLAEDIMR.L	[171-184]		Used
		Checked	Confidence	Identifying Node	PSM Ambiguity	Annotated Sequence	Modifications	# Protein Groups	# Proteins	Master Protein Accessions	Protein Accessions	# Missed Cleavages	Charge	DeltaScore	DeltaCn	Rank	Search Engine Rank	m/z [Da]	MH+ [Da]	Theo. MH+ [Da]	DeltaM [ppm]	Deltam/z [Da]	Activation Type	MS Order	Isolation Interference [%]	Ion Inject Time [ms]	RT [min]	First Scan	Spectrum File	File ID	Quan Info	Ions Score	Identity Strict	Identity Relaxed	Expectation Value	Percolator q-Value	Percolator PEP	Precursor Abundance	Apex RT [min]
		FALSE	High	Mascot (A5)	Unambiguous	[R].VEVERDNLAEDIMR.[L]		1	1	P20152	P20152	1	3	1	0	1	1	563.618	1688.84	1688.83	8.08	0.00455	HCD (High Energy Collision Dissociation)	MS2	19.598	25	33.6586	18143	MS201900102_Con1.raw	F1		26	42	35	0.505731	0	0.0007944
		FALSE	High	Mascot (A5)	Unambiguous	[R].VEVERDNLAEDIMR.[L]		1	1	P20152	P20152	1	2	0.8519	0	1	1	844.924	1688.84	1688.83	8.59	0.00726	HCD (High Energy Collision Dissociation)	MS2	0	21.801	32.1325	16931	MS201900102_Con1.raw	F1		27	42	35	0.349759	0	0.0002143	28394120	32.29
		FALSE	High	Mascot (A5)	Unambiguous	[R].VEVERDNLAEDIMR.[L]		1	1	P20152	P20152	1	3	1	0	1	1	563.619	1688.84	1688.83	9.27	0.00522	HCD (High Energy Collision Dissociation)	MS2	0	25	33.6152	18106	MS201900102_Con1.raw	F1		12	42	35	12.0911	0.0004707	0.004838
	FALSE	High	[R].TNEKVELQELNDR.[F]			0.000542758	0	1	2	2	P20152	P20152 [101-113]	1	1587.8	0	100		High	High	0	0.0004058	76	19.39	R.TNEKVELQELNDR.F	[101-113]		Used
		Checked	Confidence	Identifying Node	PSM Ambiguity	Annotated Sequence	Modifications	# Protein Groups	# Proteins	Master Protein Accessions	Protein Accessions	# Missed Cleavages	Charge	DeltaScore	DeltaCn	Rank	Search Engine Rank	m/z [Da]	MH+ [Da]	Theo. MH+ [Da]	DeltaM [ppm]	Deltam/z [Da]	Activation Type	MS Order	Isolation Interference [%]	Ion Inject Time [ms]	RT [min]	First Scan	Spectrum File	File ID	Quan Info	Ions Score	Identity Strict	Identity Relaxed	Expectation Value	Percolator q-Value	Percolator PEP	Precursor Abundance	Apex RT [min]
		FALSE	High	Mascot (A5)	Unambiguous	[R].TNEKVELQELNDR.[F]		1	2	P20152	P31001; P20152	1	2	0.8158	0	1	1	794.408	1587.81	1587.8	7.61	0.00604	HCD (High Energy Collision Dissociation)	MS2	0	8.497	19.3739	8762	MS201900102_Con1.raw	F1		76	42	35	4.52518e-06	0	0.0004058	22984568	19.39
		FALSE	High	Mascot (A5)	Unambiguous	[R].TNEKVELQELNDR.[F]		1	2	P20152	P31001; P20152	1	3	0.9815	0	1	1	529.942	1587.81	1587.8	9.06	0.0048	HCD (High Energy Collision Dissociation)	MS2	0	7.98	19.3594	8750	MS201900102_Con1.raw	F1		54	42	35	0.000716708	0	0.0004179	14721987	19.38
	FALSE	High	[R].VEVERDNLAEDIMR.[L]	1xOxidation [M13]		0.000237702	0	1	1	1	P20152	P20152 [171-184]	1	1704.82	0		No Quan Values	High	High	0	0.0001727	30		R.VEVERDNLAEDIMR.L	[171-184]		Not Used
		Checked	Confidence	Identifying Node	PSM Ambiguity	Annotated Sequence	Modifications	# Protein Groups	# Proteins	Master Protein Accessions	Protein Accessions	# Missed Cleavages	Charge	DeltaScore	DeltaCn	Rank	Search Engine Rank	m/z [Da]	MH+ [Da]	Theo. MH+ [Da]	DeltaM [ppm]	Deltam/z [Da]	Activation Type	MS Order	Isolation Interference [%]	Ion Inject Time [ms]	RT [min]	First Scan	Spectrum File	File ID	Quan Info	Ions Score	Identity Strict	Identity Relaxed	Expectation Value	Percolator q-Value	Percolator PEP	Precursor Abundance	Apex RT [min]
		FALSE	High	Mascot (A5)	Unambiguous	[R].VEVERDNLAEDImR.[L]	M13(Oxidation)	1	1	P20152	P20152	1	3	1	0	1	1	568.95	1704.83	1704.82	7.08	0.00403	HCD (High Energy Collision Dissociation)	MS2	64.9168	16.254	24.5313	11359	MS201900102_Con1.raw	F1		30	43	36	0.209724	0	0.0001727	21601482	24.66
	FALSE	High	[K].VELQELNDR.[F]			0.0179611	0.000581891	1	2	1	P20152	P20152 [105-113]	0	1115.57	0	100		High	High	0.0004707	0.01507	52	21.98	K.VELQELNDR.F	[105-113]		Used
		Checked	Confidence	Identifying Node	PSM Ambiguity	Annotated Sequence	Modifications	# Protein Groups	# Proteins	Master Protein Accessions	Protein Accessions	# Missed Cleavages	Charge	DeltaScore	DeltaCn	Rank	Search Engine Rank	m/z [Da]	MH+ [Da]	Theo. MH+ [Da]	DeltaM [ppm]	Deltam/z [Da]	Activation Type	MS Order	Isolation Interference [%]	Ion Inject Time [ms]	RT [min]	First Scan	Spectrum File	File ID	Quan Info	Ions Score	Identity Strict	Identity Relaxed	Expectation Value	Percolator q-Value	Percolator PEP	Precursor Abundance	Apex RT [min]
		FALSE	High	Mascot (A5)	Unambiguous	[K].VELQELNDR.[F]		1	2	P20152	P31001; P20152	0	2	0.75	0	1	1	558.292	1115.58	1115.57	6.69	0.00373	HCD (High Energy Collision Dissociation)	MS2	0	13.173	21.866	9905	MS201900102_Con1.raw	F1		52	40	33	0.0006552	0.0004707	0.01507	52360280	21.98
	FALSE	High	[K].VESLQEEIAFLK.[K]			0.0040213	0.000581891	1	1	1	P20152	P20152 [224-235]	0	1405.76	0	100		High	High	0.0004707	0.003201	49	48.89	K.VESLQEEIAFLK.K	[224-235]		Used
		Checked	Confidence	Identifying Node	PSM Ambiguity	Annotated Sequence	Modifications	# Protein Groups	# Proteins	Master Protein Accessions	Protein Accessions	# Missed Cleavages	Charge	DeltaScore	DeltaCn	Rank	Search Engine Rank	m/z [Da]	MH+ [Da]	Theo. MH+ [Da]	DeltaM [ppm]	Deltam/z [Da]	Activation Type	MS Order	Isolation Interference [%]	Ion Inject Time [ms]	RT [min]	First Scan	Spectrum File	File ID	Quan Info	Ions Score	Identity Strict	Identity Relaxed	Expectation Value	Percolator q-Value	Percolator PEP	Precursor Abundance	Apex RT [min]
		FALSE	High	Mascot (A5)	Unambiguous	[K].VESLQEEIAFLK.[K]		1	1	P20152	P20152	0	2	0.8163	0	1	1	703.386	1405.76	1405.76	5.25	0.00369	HCD (High Energy Collision Dissociation)	MS2	0	21.764	48.7201	34696	MS201900102_Con1.raw	F1		49	39	32	0.00100908	0.0004707	0.003201	3.93615e+06	48.89
	FALSE	High	[K].VESLQEEIAFLKK.[L]			0.0139639	0.000581891	1	1	1	P20152	P20152 [224-236]	1	1533.85	0	100		High	High	0.0004707	0.01163	13	39.22	K.VESLQEEIAFLKK.L	[224-236]		Used
		Checked	Confidence	Identifying Node	PSM Ambiguity	Annotated Sequence	Modifications	# Protein Groups	# Proteins	Master Protein Accessions	Protein Accessions	# Missed Cleavages	Charge	DeltaScore	DeltaCn	Rank	Search Engine Rank	m/z [Da]	MH+ [Da]	Theo. MH+ [Da]	DeltaM [ppm]	Deltam/z [Da]	Activation Type	MS Order	Isolation Interference [%]	Ion Inject Time [ms]	RT [min]	First Scan	Spectrum File	File ID	Quan Info	Ions Score	Identity Strict	Identity Relaxed	Expectation Value	Percolator q-Value	Percolator PEP	Precursor Abundance	Apex RT [min]
		FALSE	High	Mascot (A5)	Unambiguous	[K].VESLQEEIAFLKK.[L]		1	1	P20152	P20152	1	3	0.7692	0	1	1	511.959	1533.86	1533.85	7.61	0.00389	HCD (High Energy Collision Dissociation)	MS2	92.9052	25	39.083	23739	MS201900102_Con1.raw	F1		13	36	29	2.50401	0.0004707	0.01163	1.53668e+06	39.22
	FALSE	High	[K].TVETRDGQVINETSQHHDDLE.[-]			0.00239032	0.000581891	1	1	3	P20152	P20152 [446-466]	1	2423.11	0	100		High	High	0.0004707	0.001878	47	18.93	K.TVETRDGQVINETSQHHDDLE.-	[446-466]		Used
		Checked	Confidence	Identifying Node	PSM Ambiguity	Annotated Sequence	Modifications	# Protein Groups	# Proteins	Master Protein Accessions	Protein Accessions	# Missed Cleavages	Charge	DeltaScore	DeltaCn	Rank	Search Engine Rank	m/z [Da]	MH+ [Da]	Theo. MH+ [Da]	DeltaM [ppm]	Deltam/z [Da]	Activation Type	MS Order	Isolation Interference [%]	Ion Inject Time [ms]	RT [min]	First Scan	Spectrum File	File ID	Quan Info	Ions Score	Identity Strict	Identity Relaxed	Expectation Value	Percolator q-Value	Percolator PEP	Precursor Abundance	Apex RT [min]
		FALSE	High	Mascot (A5)	Unambiguous	[K].TVETRDGQVINETSQHHDDLE.[-]		1	1	P20152	P20152	1	3	0.9394	0	1	1	808.378	2423.12	2423.11	4.62	0.00373	HCD (High Energy Collision Dissociation)	MS2	38.1973	21.506	18.2068	7453	MS201900102_Con1.raw	F1		33	46	39	0.225228	0.0004707	0.003522	2.05838e+06	18.19
		FALSE	High	Mascot (A5)	Unambiguous	[K].TVETRDGQVINETSQHHDDLE.[-]		1	1	P20152	P20152	1	3	0.9333	0	1	1	808.379	2423.12	2423.11	6.43	0.00519	HCD (High Energy Collision Dissociation)	MS2	0	25	18.1595	7396	MS201900102_Con1.raw	F1		30	46	39	0.391404	0.0004707	0.003008	2.05838e+06	18.19
		FALSE	High	Mascot (A5)	Unambiguous	[K].TVETRDGQVINETSQHHDDLE.[-]		1	1	P20152	P20152	1	3	0.9362	0	1	1	808.378	2423.12	2423.11	5.45	0.0044	HCD (High Energy Collision Dissociation)	MS2		25	18.9413	8295	MS201900102_Con1.raw	F1		47	46	39	0.00812441	0.0004707	0.001878	2.91215e+06	18.93
	FALSE	High	[R].TYSLGSALRPSTSR.[S]			0.00266919	0.000581891	1	1	2	P20152	P20152 [37-50]	0	1495.79	0	100		High	High	0.0004707	0.002096	34	22.82	R.TYSLGSALRPSTSR.S	[37-50]		Used
		Checked	Confidence	Identifying Node	PSM Ambiguity	Annotated Sequence	Modifications	# Protein Groups	# Proteins	Master Protein Accessions	Protein Accessions	# Missed Cleavages	Charge	DeltaScore	DeltaCn	Rank	Search Engine Rank	m/z [Da]	MH+ [Da]	Theo. MH+ [Da]	DeltaM [ppm]	Deltam/z [Da]	Activation Type	MS Order	Isolation Interference [%]	Ion Inject Time [ms]	RT [min]	First Scan	Spectrum File	File ID	Quan Info	Ions Score	Identity Strict	Identity Relaxed	Expectation Value	Percolator q-Value	Percolator PEP	Precursor Abundance	Apex RT [min]
		FALSE	High	Mascot (A5)	Unambiguous	[R].TYSLGSALRPSTSR.[S]		1	1	P20152	P20152	0	2	1	0	1	1	748.403	1495.8	1495.79	8.55	0.00639	HCD (High Energy Collision Dissociation)	MS2	0	11.521	22.5508	10229	MS201900102_Con1.raw	F1		30	39	32	0.108391	0.0004707	0.02381	37814352	22.31
		FALSE	High	Mascot (A5)	Unambiguous	[R].TYSLGSALRPSTSR.[S]		1	1	P20152	P20152	0	2	0.9706	0	1	1	748.402	1495.8	1495.79	7.49	0.0056	HCD (High Energy Collision Dissociation)	MS2	0	18.3	22.9769	10446	MS201900102_Con1.raw	F1		34	40	33	0.0449382	0.0004707	0.002096	52539628	22.82
	FALSE	High	[K].FADLSEAANR.[N]			0.00240292	0.000581891	1	1	1	P20152	P20152 [295-304]	0	1093.53	0	100		High	High	0.0004707	0.001882	39	21.18	K.FADLSEAANR.N	[295-304]		Used
		Checked	Confidence	Identifying Node	PSM Ambiguity	Annotated Sequence	Modifications	# Protein Groups	# Proteins	Master Protein Accessions	Protein Accessions	# Missed Cleavages	Charge	DeltaScore	DeltaCn	Rank	Search Engine Rank	m/z [Da]	MH+ [Da]	Theo. MH+ [Da]	DeltaM [ppm]	Deltam/z [Da]	Activation Type	MS Order	Isolation Interference [%]	Ion Inject Time [ms]	RT [min]	First Scan	Spectrum File	File ID	Quan Info	Ions Score	Identity Strict	Identity Relaxed	Expectation Value	Percolator q-Value	Percolator PEP	Precursor Abundance	Apex RT [min]
		FALSE	High	Mascot (A5)	Unambiguous	[K].FADLSEAANR.[N]		1	1	P20152	P20152	0	2	0.8718	0	1	1	547.271	1093.54	1093.53	7.6	0.00415	HCD (High Energy Collision Dissociation)	MS2	0	22.121	21.0123	9509	MS201900102_Con1.raw	F1		39	40	33	0.0154324	0.0004707	0.001882	123349472	21.18
	FALSE	High	[R].EMEENFALEAANYQDTIGR.[L]			0.00430556	0.000581891	1	1	1	P20152	P20152 [346-364]	0	2200.98	0		Not Reliable	High	High	0.0004707	0.003439	12		R.EMEENFALEAANYQDTIGR.L	[346-364]		Not Used
		Checked	Confidence	Identifying Node	PSM Ambiguity	Annotated Sequence	Modifications	# Protein Groups	# Proteins	Master Protein Accessions	Protein Accessions	# Missed Cleavages	Charge	DeltaScore	DeltaCn	Rank	Search Engine Rank	m/z [Da]	MH+ [Da]	Theo. MH+ [Da]	DeltaM [ppm]	Deltam/z [Da]	Activation Type	MS Order	Isolation Interference [%]	Ion Inject Time [ms]	RT [min]	First Scan	Spectrum File	File ID	Quan Info	Ions Score	Identity Strict	Identity Relaxed	Expectation Value	Percolator q-Value	Percolator PEP	Precursor Abundance	Apex RT [min]
		FALSE	High	Mascot (A5)	Unambiguous	[R].EMEENFALEAANYQDTIGR.[L]		1	1	P20152	P20152	0	2	1	0	1	1	1101.01	2201.02	2200.98	18.5	0.02036	HCD (High Energy Collision Dissociation)	MS2	67.0539	25	42.0706	27239	MS201900102_Con1.raw	F1	Not Reliable	12	45	38	22.4318	0.0004707	0.003439
	FALSE	High	[KR].EYQDLLNVK.[M]	1xAcetyl [N-Term]	P08553 1xAcetyl [N-Term]; P46660 1xAcetyl [N-Term]; P20152 1xAcetyl [N-Term]	0.00779591	0.000581891	3	6	1	P08553; P46660; P20152	P08553 [381-389]; P46660 [378-386]; P20152 [382-390]	0	1163.59	0	100	Shared	High	High	0.0004707	0.006356	14	41.94	R.EYQDLLNVK.M	[382-390]	1xAcetyl [N-Term]	Used
		Checked	Confidence	Identifying Node	PSM Ambiguity	Annotated Sequence	Modifications	# Protein Groups	# Proteins	Master Protein Accessions	Protein Accessions	# Missed Cleavages	Charge	DeltaScore	DeltaCn	Rank	Search Engine Rank	m/z [Da]	MH+ [Da]	Theo. MH+ [Da]	DeltaM [ppm]	Deltam/z [Da]	Activation Type	MS Order	Isolation Interference [%]	Ion Inject Time [ms]	RT [min]	First Scan	Spectrum File	File ID	Quan Info	Ions Score	Identity Strict	Identity Relaxed	Expectation Value	Percolator q-Value	Percolator PEP	Precursor Abundance	Apex RT [min]
		FALSE	High	Mascot (A5)	Unambiguous	[KR].eYQDLLNVK.[M]	N-Term(Acetyl)	3	6	P08553; P46660; P20152	P08551; P08553; P46660; P31001; P20152; P19246	0	2	1	0	1	1	582.306	1163.6	1163.59	8.92	0.00519	HCD (High Energy Collision Dissociation)	MS2	0	25	41.8025	26926	MS201900102_Con1.raw	F1		14	40	33	4.23453	0.0004707	0.006356	1.20229e+06	41.94
	FALSE	High	[R].DNLAEDIMR.[L]	1xOxidation [M8]		0.0150282	0.000581891	1	1	1	P20152	P20152 [176-184]	0	1092.5	0		No Quan Values	High	High	0.0004707	0.01253	33		R.DNLAEDIMR.L	[176-184]		Not Used
		Checked	Confidence	Identifying Node	PSM Ambiguity	Annotated Sequence	Modifications	# Protein Groups	# Proteins	Master Protein Accessions	Protein Accessions	# Missed Cleavages	Charge	DeltaScore	DeltaCn	Rank	Search Engine Rank	m/z [Da]	MH+ [Da]	Theo. MH+ [Da]	DeltaM [ppm]	Deltam/z [Da]	Activation Type	MS Order	Isolation Interference [%]	Ion Inject Time [ms]	RT [min]	First Scan	Spectrum File	File ID	Quan Info	Ions Score	Identity Strict	Identity Relaxed	Expectation Value	Percolator q-Value	Percolator PEP	Precursor Abundance	Apex RT [min]
		FALSE	High	Mascot (A5)	Unambiguous	[R].DNLAEDImR.[L]	M8(Oxidation)	1	1	P20152	P20152	0	2	0.7879	0	1	1	546.758	1092.51	1092.5	8.11	0.00443	HCD (High Energy Collision Dissociation)	MS2	0	19.677	24.5662	11383	MS201900102_Con1.raw	F1		33	40	33	0.0515254	0.0004707	0.01253	8.07711e+06	24.79
	FALSE	High	[R].DNLAEDIMR.[L]			0.0055406	0.000581891	1	1	3	P20152	P20152 [176-184]	0	1076.5	0	100		High	High	0.0004707	0.004465	58	36.99	R.DNLAEDIMR.L	[176-184]		Used
		Checked	Confidence	Identifying Node	PSM Ambiguity	Annotated Sequence	Modifications	# Protein Groups	# Proteins	Master Protein Accessions	Protein Accessions	# Missed Cleavages	Charge	DeltaScore	DeltaCn	Rank	Search Engine Rank	m/z [Da]	MH+ [Da]	Theo. MH+ [Da]	DeltaM [ppm]	Deltam/z [Da]	Activation Type	MS Order	Isolation Interference [%]	Ion Inject Time [ms]	RT [min]	First Scan	Spectrum File	File ID	Quan Info	Ions Score	Identity Strict	Identity Relaxed	Expectation Value	Percolator q-Value	Percolator PEP	Precursor Abundance	Apex RT [min]
		FALSE	High	Mascot (A5)	Unambiguous	[R].DNLAEDIMR.[L]		1	1	P20152	P20152	0	2	1	0	1	1	538.759	1076.51	1076.5	6.46	0.00347	HCD (High Energy Collision Dissociation)	MS2	44.6651	25	36.7728	21044	MS201900102_Con1.raw	F1		34	40	33	0.0492587	0.0004707	0.01914	20917636	36.99
		FALSE	High	Mascot (A5)	Unambiguous	[R].DNLAEDIMR.[L]		1	1	P20152	P20152	0	2	0.8103	0	1	1	538.76	1076.51	1076.5	7.93	0.00427	HCD (High Energy Collision Dissociation)	MS2	8.43087	25	37.2248	21575	MS201900102_Con1.raw	F1		58	40	33	0.000195735	0.0004707	0.004465	20917636	36.99
		FALSE	High	Mascot (A5)	Unambiguous	[R].DNLAEDIMR.[L]		1	1	P20152	P20152	0	2	1	0	1	1	538.76	1076.51	1076.5	8.04	0.00433	HCD (High Energy Collision Dissociation)	MS2	75.8479	25	40.5555	25505	MS201900102_Con1.raw	F1		17	40	33	2.61618	0.0004707	0.008593	309395	40.58
	FALSE	High	[K].ILLAELEQLK.[G]			0.00426056	0.000581891	1	1	5	P20152	P20152 [130-139]	0	1169.71	0	100		High	High	0.0004707	0.005447	71	47.05	K.ILLAELEQLK.G	[130-139]		Used
		Checked	Confidence	Identifying Node	PSM Ambiguity	Annotated Sequence	Modifications	# Protein Groups	# Proteins	Master Protein Accessions	Protein Accessions	# Missed Cleavages	Charge	DeltaScore	DeltaCn	Rank	Search Engine Rank	m/z [Da]	MH+ [Da]	Theo. MH+ [Da]	DeltaM [ppm]	Deltam/z [Da]	Activation Type	MS Order	Isolation Interference [%]	Ion Inject Time [ms]	RT [min]	First Scan	Spectrum File	File ID	Quan Info	Ions Score	Identity Strict	Identity Relaxed	Expectation Value	Percolator q-Value	Percolator PEP	Precursor Abundance	Apex RT [min]
		FALSE	High	Mascot (A5)	Unambiguous	[K].ILLAELEQLK.[G]		1	1	P20152	P20152	0	2	0.75	0	1	1	585.366	1169.72	1169.71	9.11	0.00533	HCD (High Energy Collision Dissociation)	MS2	0	25	48.343	34269	MS201900102_Con1.raw	F1		52	32	25	0.000102867	0.0004707	0.0034	2.82737e+06	48.14
		FALSE	High	Mascot (A5)	Unambiguous	[K].ILLAELEQLK.[G]		1	1	P20152	P20152	0	2	0.4783	0	1	1	585.366	1169.72	1169.71	9.01	0.00527	HCD (High Energy Collision Dissociation)	MS2	0	25	47.8827	33815	MS201900102_Con1.raw	F1		23	32	25	0.086552	0.0004707	0.009386	124554024	47.05
		FALSE	High	Mascot (A5)	Unambiguous	[K].ILLAELEQLK.[G]		1	1	P20152	P20152	0	2	0.7	0	1	1	585.366	1169.72	1169.71	8.9	0.00521	HCD (High Energy Collision Dissociation)	MS2	8.95542	25	48.9616	34947	MS201900102_Con1.raw	F1		50	32	25	0.000185471	0.0004707	0.01093
		FALSE	High	Mascot (A5)	Unambiguous	[K].ILLAELEQLK.[G]		1	1	P20152	P20152	0	2	0.662	0	1	1	585.366	1169.72	1169.71	8.8	0.00514	HCD (High Energy Collision Dissociation)	MS2	0	3.127	47.0242	32893	MS201900102_Con1.raw	F1		71	32	25	1.5401e-06	0.0004707	0.01875	124554024	47.05
		FALSE	High	Mascot (A5)	Unambiguous	[K].ILLAELEQLK.[G]		1	1	P20152	P20152	0	2	0.662	0	1	1	585.365	1169.72	1169.71	7.54	0.00441	HCD (High Energy Collision Dissociation)	MS2	0	8.314	47.4497	33344	MS201900102_Con1.raw	F1		71	33	26	2.02018e-06	0.0004707	0.005447	124554024	47.05
	FALSE	High	[K].LQEEMLQR.[E]	1xOxidation [M5]		0.0183416	0.000581891	1	1	1	P20152	P20152 [189-196]	0	1062.52	0	100		High	High	0.0004707	0.01538	40	15.87	K.LQEEMLQR.E	[189-196]		Used
		Checked	Confidence	Identifying Node	PSM Ambiguity	Annotated Sequence	Modifications	# Protein Groups	# Proteins	Master Protein Accessions	Protein Accessions	# Missed Cleavages	Charge	DeltaScore	DeltaCn	Rank	Search Engine Rank	m/z [Da]	MH+ [Da]	Theo. MH+ [Da]	DeltaM [ppm]	Deltam/z [Da]	Activation Type	MS Order	Isolation Interference [%]	Ion Inject Time [ms]	RT [min]	First Scan	Spectrum File	File ID	Quan Info	Ions Score	Identity Strict	Identity Relaxed	Expectation Value	Percolator q-Value	Percolator PEP	Precursor Abundance	Apex RT [min]
		FALSE	High	Mascot (A5)	Unambiguous	[K].LQEEmLQR.[E]	M5(Oxidation)	1	1	P20152	P20152	0	2	0.775	0	1	1	531.771	1062.53	1062.52	9.31	0.00495	HCD (High Energy Collision Dissociation)	MS2	8.29349	25	15.7563	5479	MS201900102_Con1.raw	F1		40	40	33	0.0137237	0.0004707	0.01538	1.71805e+06	15.87
	FALSE	High	[K].LQEEMLQR.[E]			0.0235814	0.000581891	1	1	1	P20152	P20152 [189-196]	0	1046.53	0	100		High	High	0.0004707	0.01995	30	18.89	K.LQEEMLQR.E	[189-196]		Used
		Checked	Confidence	Identifying Node	PSM Ambiguity	Annotated Sequence	Modifications	# Protein Groups	# Proteins	Master Protein Accessions	Protein Accessions	# Missed Cleavages	Charge	DeltaScore	DeltaCn	Rank	Search Engine Rank	m/z [Da]	MH+ [Da]	Theo. MH+ [Da]	DeltaM [ppm]	Deltam/z [Da]	Activation Type	MS Order	Isolation Interference [%]	Ion Inject Time [ms]	RT [min]	First Scan	Spectrum File	File ID	Quan Info	Ions Score	Identity Strict	Identity Relaxed	Expectation Value	Percolator q-Value	Percolator PEP	Precursor Abundance	Apex RT [min]
		FALSE	High	Mascot (A5)	Unambiguous	[K].LQEEMLQR.[E]		1	1	P20152	P20152	0	2	0.6333	0	1	1	523.772	1046.54	1046.53	7.4	0.00387	HCD (High Energy Collision Dissociation)	MS2	26.8671	19.646	18.8	8130	MS201900102_Con1.raw	F1		30	40	33	0.131716	0.0004707	0.01995	45937768	18.89
	FALSE	High	[R].LQDEIQNMK.[E]	1xOxidation [M8]		0.0357916	0.000581891	1	1	1	P20152	P20152 [365-373]	0	1134.55	0		No Quan Values	High	High	0.0004707	0.03069	14		R.LQDEIQNMK.E	[365-373]		Not Used
		Checked	Confidence	Identifying Node	PSM Ambiguity	Annotated Sequence	Modifications	# Protein Groups	# Proteins	Master Protein Accessions	Protein Accessions	# Missed Cleavages	Charge	DeltaScore	DeltaCn	Rank	Search Engine Rank	m/z [Da]	MH+ [Da]	Theo. MH+ [Da]	DeltaM [ppm]	Deltam/z [Da]	Activation Type	MS Order	Isolation Interference [%]	Ion Inject Time [ms]	RT [min]	First Scan	Spectrum File	File ID	Quan Info	Ions Score	Identity Strict	Identity Relaxed	Expectation Value	Percolator q-Value	Percolator PEP	Precursor Abundance	Apex RT [min]
		FALSE	High	Mascot (A5)	Unambiguous	[R].LQDEIQNmK.[E]	M8(Oxidation)	1	1	P20152	P20152	0	2	1	0	1	1	567.779	1134.55	1134.55	3.65	0.00207	HCD (High Energy Collision Dissociation)	MS2	55.1336	25	15.4312	5089	MS201900102_Con1.raw	F1		14	41	34	5.05918	0.0004707	0.03069	388470	15.69
	FALSE	High	[R].LQDEIQNMK.[E]			0.039299	0.000581891	1	1	1	P20152	P20152 [365-373]	0	1118.55	0	100		High	High	0.0004707	0.03384	7	18.54	R.LQDEIQNMK.E	[365-373]		Used
		Checked	Confidence	Identifying Node	PSM Ambiguity	Annotated Sequence	Modifications	# Protein Groups	# Proteins	Master Protein Accessions	Protein Accessions	# Missed Cleavages	Charge	DeltaScore	DeltaCn	Rank	Search Engine Rank	m/z [Da]	MH+ [Da]	Theo. MH+ [Da]	DeltaM [ppm]	Deltam/z [Da]	Activation Type	MS Order	Isolation Interference [%]	Ion Inject Time [ms]	RT [min]	First Scan	Spectrum File	File ID	Quan Info	Ions Score	Identity Strict	Identity Relaxed	Expectation Value	Percolator q-Value	Percolator PEP	Precursor Abundance	Apex RT [min]
		FALSE	High	Mascot (A5)	Unambiguous	[R].LQDEIQNMK.[E]		1	1	P20152	P20152	0	2	1	0	1	1	559.782	1118.56	1118.55	4.4	0.00246	HCD (High Energy Collision Dissociation)	MS2	76.4484	8.48	18.4598	7730	MS201900102_Con1.raw	F1		7	41	34	27.6232	0.0004707	0.03384	13285771	18.54
	FALSE	High	[R].EKLQEEMLQR.[E]			0.044733	0.00154131	1	1	1	P20152	P20152 [187-196]	1	1303.67	0	100		High	High	0.001254	0.03871	45	18.59	R.EKLQEEMLQR.E	[187-196]		Used
		Checked	Confidence	Identifying Node	PSM Ambiguity	Annotated Sequence	Modifications	# Protein Groups	# Proteins	Master Protein Accessions	Protein Accessions	# Missed Cleavages	Charge	DeltaScore	DeltaCn	Rank	Search Engine Rank	m/z [Da]	MH+ [Da]	Theo. MH+ [Da]	DeltaM [ppm]	Deltam/z [Da]	Activation Type	MS Order	Isolation Interference [%]	Ion Inject Time [ms]	RT [min]	First Scan	Spectrum File	File ID	Quan Info	Ions Score	Identity Strict	Identity Relaxed	Expectation Value	Percolator q-Value	Percolator PEP	Precursor Abundance	Apex RT [min]
		FALSE	High	Mascot (A5)	Unambiguous	[R].EKLQEEMLQR.[E]		1	1	P20152	P20152	1	2	0.7333	0	1	1	652.344	1303.68	1303.67	9.79	0.00638	HCD (High Energy Collision Dissociation)	MS2	29.47	11.961	18.4369	7702	MS201900102_Con1.raw	F1		45	41	34	0.00445086	0.001254	0.03871	21114248	18.59
	FALSE	High	[R].QVQSLTCEVDALK.[G]	1xPhospho [S4]	P20152 1xPhospho [S325]	0.0478412	0.00154131	1	1	1	P20152	P20152 [322-334]	0	1513.7	0		No Quan Values	High	High	0.001254	0.04145	5		R.QVQSLTCEVDALK.G	[322-334]	1xPhospho [S325]	Not Used
		Checked	Confidence	Identifying Node	PSM Ambiguity	Annotated Sequence	Modifications	# Protein Groups	# Proteins	Master Protein Accessions	Protein Accessions	# Missed Cleavages	Charge	DeltaScore	DeltaCn	Rank	Search Engine Rank	m/z [Da]	MH+ [Da]	Theo. MH+ [Da]	DeltaM [ppm]	Deltam/z [Da]	Activation Type	MS Order	Isolation Interference [%]	Ion Inject Time [ms]	RT [min]	First Scan	Spectrum File	File ID	Quan Info	Ions Score	Identity Strict	Identity Relaxed	Expectation Value	Percolator q-Value	Percolator PEP	Precursor Abundance	Apex RT [min]
		FALSE	High	Mascot (A5)	Unambiguous	[R].QVQsLTCEVDALK.[G]	S4(Phospho)	1	1	P20152	P20152	0	2	0.4	0	1	1	757.354	1513.7	1513.7	3.17	0.0024	HCD (High Energy Collision Dissociation)	MS2	0	25	43.7384	29213	MS201900102_Con1.raw	F1		5	43	36	58.0659	0.001254	0.04145
	FALSE	High	[KR].EYQDLLNVK.[M]			0.0572858	0.00154131	3	6	2	P08553; P46660; P20152	P08553 [381-389]; P46660 [378-386]; P20152 [382-390]	0	1121.58	0	100	Shared	High	High	0.001254	0.05	28	31.59	R.EYQDLLNVK.M	[382-390]		Used
		Checked	Confidence	Identifying Node	PSM Ambiguity	Annotated Sequence	Modifications	# Protein Groups	# Proteins	Master Protein Accessions	Protein Accessions	# Missed Cleavages	Charge	DeltaScore	DeltaCn	Rank	Search Engine Rank	m/z [Da]	MH+ [Da]	Theo. MH+ [Da]	DeltaM [ppm]	Deltam/z [Da]	Activation Type	MS Order	Isolation Interference [%]	Ion Inject Time [ms]	RT [min]	First Scan	Spectrum File	File ID	Quan Info	Ions Score	Identity Strict	Identity Relaxed	Expectation Value	Percolator q-Value	Percolator PEP	Precursor Abundance	Apex RT [min]
		FALSE	High	Mascot (A5)	Unambiguous	[KR].EYQDLLNVK.[M]		3	6	P08553; P46660; P20152	P08551; P08553; P46660; P31001; P20152; P19246	0	2	0.8077	0	1	1	561.302	1121.6	1121.58	11.17	0.00626	HCD (High Energy Collision Dissociation)	MS2	0	19.899	31.3651	16274	MS201900102_Con1.raw	F1		26	39	32	0.200627	0.001254	0.057	91269016	31.59
		FALSE	High	Mascot (A5)	Unambiguous	[KR].EYQDLLNVK.[M]		3	6	P08553; P46660; P20152	P08551; P08553; P46660; P31001; P20152; P19246	0	2	0.5714	0	1	1	561.3	1121.59	1121.58	7.36	0.00413	HCD (High Energy Collision Dissociation)	MS2		15.699	31.7892	16635	MS201900102_Con1.raw	F1		28	40	33	0.153827	0.001254	0.05	91269016	31.59
	FALSE	High	[R].LGDLYEEEMRELR.[R]			0.118313	0.00343967	1	1	1	P20152	P20152 [146-158]	1	1652.79	0		No Quan Values	High	High	0.002787	0.1058	16		R.LGDLYEEEMRELR.R	[146-158]		Not Used
		Checked	Confidence	Identifying Node	PSM Ambiguity	Annotated Sequence	Modifications	# Protein Groups	# Proteins	Master Protein Accessions	Protein Accessions	# Missed Cleavages	Charge	DeltaScore	DeltaCn	Rank	Search Engine Rank	m/z [Da]	MH+ [Da]	Theo. MH+ [Da]	DeltaM [ppm]	Deltam/z [Da]	Activation Type	MS Order	Isolation Interference [%]	Ion Inject Time [ms]	RT [min]	First Scan	Spectrum File	File ID	Quan Info	Ions Score	Identity Strict	Identity Relaxed	Expectation Value	Percolator q-Value	Percolator PEP	Precursor Abundance	Apex RT [min]
		FALSE	High	Mascot (A5)	Unambiguous	[R].LGDLYEEEMRELR.[R]		1	1	P20152	P20152	1	3	1	0	1	1	551.61	1652.81	1652.79	11.88	0.00655	HCD (High Energy Collision Dissociation)	MS2	77.6574	25	37.4612	21858	MS201900102_Con1.raw	F1		16	43	36	5.2287	0.002787	0.1058	238493	37.41
	FALSE	High	[R].FANYIDK.[V]			0.135626	0.00479739	1	1	1	P20152	P20152 [114-120]	0	870.436	0	100		High	High	0.003883	0.1215	29	19.07	R.FANYIDK.V	[114-120]		Used
		Checked	Confidence	Identifying Node	PSM Ambiguity	Annotated Sequence	Modifications	# Protein Groups	# Proteins	Master Protein Accessions	Protein Accessions	# Missed Cleavages	Charge	DeltaScore	DeltaCn	Rank	Search Engine Rank	m/z [Da]	MH+ [Da]	Theo. MH+ [Da]	DeltaM [ppm]	Deltam/z [Da]	Activation Type	MS Order	Isolation Interference [%]	Ion Inject Time [ms]	RT [min]	First Scan	Spectrum File	File ID	Quan Info	Ions Score	Identity Strict	Identity Relaxed	Expectation Value	Percolator q-Value	Percolator PEP	Precursor Abundance	Apex RT [min]
		FALSE	High	Mascot (A5)	Unambiguous	[R].FANYIDK.[V]		1	1	P20152	P20152	0	2	0.7931	0	1	1	435.725	870.442	870.436	7.29	0.00317	HCD (High Energy Collision Dissociation)	MS2	68.5841	25	18.8708	8219	MS201900102_Con1.raw	F1		29	35	28	0.046965	0.003883	0.1215	62650900	19.07
FALSE	High	Master Protein	Q3TTY5	Keratin, type II cytoskeletal 2 epidermal OS=Mus musculus OX=10090 GN=Krt2 PE=1 SV=1	0	91.131	43	20	37	19	1	707	70.9	8.06	1190	20	cell organization and biogenesis;cell proliferation;cellular component movement;metabolic process	cytoskeleton;membrane;nucleus	protein binding;structural molecule activity	Pf00038, Pf13166	16681	ENSMUSG00000064201.8	Krt2	15			0	100	High
	Checked	Confidence	Annotated Sequence	Modifications	Modifications in Master Proteins	Qvality PEP	Qvality q-value	# Protein Groups	# Proteins	# PSMs	Master Protein Accessions	Positions in Master Proteins	# Missed Cleavages	Theo. MH+ [Da]	# Razor Quan Results	Abundances (Scaled): F1: Sample	Quan Info	Found in Sample: [S1] F1: Sample	Confidence (by Search Engine): Mascot	Percolator q-Value (by Search Engine): Mascot	Percolator PEP (by Search Engine): Mascot	Ions Score (by Search Engine): Mascot	Top Apex RT [min]	Sequence in Protein	Positions in Protein	Peptide Group Modifications in Protein	Quan Usage
	FALSE	High	[R].FLEQQNQVLR.[T]			0.000192607	0	1	1	1	Q3TTY5	Q3TTY5 [219-228]	0	1274.69	0		No Quan Values	High	High	0	0.0001388	65		R.FLEQQNQVLR.T	[219-228]		Not Used
		Checked	Confidence	Identifying Node	PSM Ambiguity	Annotated Sequence	Modifications	# Protein Groups	# Proteins	Master Protein Accessions	Protein Accessions	# Missed Cleavages	Charge	DeltaScore	DeltaCn	Rank	Search Engine Rank	m/z [Da]	MH+ [Da]	Theo. MH+ [Da]	DeltaM [ppm]	Deltam/z [Da]	Activation Type	MS Order	Isolation Interference [%]	Ion Inject Time [ms]	RT [min]	First Scan	Spectrum File	File ID	Quan Info	Ions Score	Identity Strict	Identity Relaxed	Expectation Value	Percolator q-Value	Percolator PEP	Precursor Abundance	Apex RT [min]
		FALSE	High	Mascot (A5)	Unambiguous	[R].FLEQQNQVLR.[T]		1	1	Q3TTY5	Q3TTY5	0	2	0.8308	0	1	1	637.852	1274.7	1274.69	9.44	0.00602	HCD (High Energy Collision Dissociation)	MS2	0	15.662	24.5723	11389	MS201900102_Con1.raw	F1		65	40	33	3.09511e-05	0	0.0001388	21586428	24.64
	FALSE	High	[K].SISSSVAGNSGGYGGSSFGGSSGFGGGR.[G]			4.13442e-08	0	1	1	1	Q3TTY5	Q3TTY5 [73-100]	0	2440.08	0		No Quan Values	High	High	0	2.237e-08	134		K.SISSSVAGNSGGYGGSSFGGSSGFGGGR.G	[73-100]		Not Used
		Checked	Confidence	Identifying Node	PSM Ambiguity	Annotated Sequence	Modifications	# Protein Groups	# Proteins	Master Protein Accessions	Protein Accessions	# Missed Cleavages	Charge	DeltaScore	DeltaCn	Rank	Search Engine Rank	m/z [Da]	MH+ [Da]	Theo. MH+ [Da]	DeltaM [ppm]	Deltam/z [Da]	Activation Type	MS Order	Isolation Interference [%]	Ion Inject Time [ms]	RT [min]	First Scan	Spectrum File	File ID	Quan Info	Ions Score	Identity Strict	Identity Relaxed	Expectation Value	Percolator q-Value	Percolator PEP	Precursor Abundance	Apex RT [min]
		FALSE	High	Mascot (A5)	Unambiguous	[K].SISSSVAGNSGGYGGSSFGGSSGFGGGR.[G]		1	1	Q3TTY5	Q3TTY5	0	2	1	0	1	1	1220.55	2440.09	2440.08	7.7	0.0094	HCD (High Energy Collision Dissociation)	MS2	0	25	34.2884	18672	MS201900102_Con1.raw	F1		134	46	39	1.58813e-11	0	2.237e-08	5861606	34.39
	FALSE	High	[R].GFGGGQGFGGSGGFGGGSGFGGGQGFGGGSR.[F]			1.53971e-07	0	1	1	1	Q3TTY5	Q3TTY5 [101-131]	0	2568.1	0	100		High	High	0	8.738e-08	97	45.24	R.GFGGGQGFGGSGGFGGGSGFGGGQGFGGGSR.F	[101-131]		Used
		Checked	Confidence	Identifying Node	PSM Ambiguity	Annotated Sequence	Modifications	# Protein Groups	# Proteins	Master Protein Accessions	Protein Accessions	# Missed Cleavages	Charge	DeltaScore	DeltaCn	Rank	Search Engine Rank	m/z [Da]	MH+ [Da]	Theo. MH+ [Da]	DeltaM [ppm]	Deltam/z [Da]	Activation Type	MS Order	Isolation Interference [%]	Ion Inject Time [ms]	RT [min]	First Scan	Spectrum File	File ID	Quan Info	Ions Score	Identity Strict	Identity Relaxed	Expectation Value	Percolator q-Value	Percolator PEP	Precursor Abundance	Apex RT [min]
		FALSE	High	Mascot (A5)	Unambiguous	[R].GFGGGQGFGGSGGFGGGSGFGGGQGFGGGSR.[F]		1	1	Q3TTY5	Q3TTY5	0	2	1	0	1	1	1284.57	2568.13	2568.1	11.89	0.01527	HCD (High Energy Collision Dissociation)	MS2	16.0506	25	45.1845	30748	MS201900102_Con1.raw	F1		97	46	39	1.02866e-07	0	8.738e-08	4.33796e+06	45.24
	FALSE	High	[R].GFSSGSAVVSGGSR.[R]			0.000694931	0	1	1	3	Q3TTY5	Q3TTY5 [23-36]	0	1254.61	0	100		High	High	0	0.0007374	73	17.09	R.GFSSGSAVVSGGSR.R	[23-36]		Used
		Checked	Confidence	Identifying Node	PSM Ambiguity	Annotated Sequence	Modifications	# Protein Groups	# Proteins	Master Protein Accessions	Protein Accessions	# Missed Cleavages	Charge	DeltaScore	DeltaCn	Rank	Search Engine Rank	m/z [Da]	MH+ [Da]	Theo. MH+ [Da]	DeltaM [ppm]	Deltam/z [Da]	Activation Type	MS Order	Isolation Interference [%]	Ion Inject Time [ms]	RT [min]	First Scan	Spectrum File	File ID	Quan Info	Ions Score	Identity Strict	Identity Relaxed	Expectation Value	Percolator q-Value	Percolator PEP	Precursor Abundance	Apex RT [min]
		FALSE	High	Mascot (A5)	Unambiguous	[R].GFSSGSAVVSGGSR.[R]		1	1	Q3TTY5	Q3TTY5	0	2	0.8644	0	1	1	627.81	1254.61	1254.61	4.9	0.00307	HCD (High Energy Collision Dissociation)	MS2	0	14.629	17.3928	6564	MS201900102_Con1.raw	F1	Not Reliable	59	41	34	0.000164373	0	0.0005216
		FALSE	High	Mascot (A5)	Unambiguous	[R].GFSSGSAVVSGGSR.[R]		1	1	Q3TTY5	Q3TTY5	0	2	0.9041	0	1	1	627.813	1254.62	1254.61	8.4	0.00527	HCD (High Energy Collision Dissociation)	MS2	0	5.91	16.9703	6245	MS201900102_Con1.raw	F1		73	41	34	7.37435e-06	0	0.0007374	218017392	17.09
		FALSE	High	Mascot (A5)	Unambiguous	[R].GFSSGSAVVSGGSR.[R]		1	1	Q3TTY5	Q3TTY5	0	2	1	0	1	1	627.812	1254.62	1254.61	8.3	0.00521	HCD (High Energy Collision Dissociation)	MS2	48.5795	25	18.3649	7626	MS201900102_Con1.raw	F1	Not Reliable	29	41	34	0.164405	0.001254	0.03947
	FALSE	High	[R].GGSGGGGFGSQSLVGLGGYK.[S]			7.54529e-06	0	1	1	2	Q3TTY5	Q3TTY5 [53-72]	0	1741.85	0	100		High	High	0	4.867e-06	108	37.63	R.GGSGGGGFGSQSLVGLGGYK.S	[53-72]		Used
		Checked	Confidence	Identifying Node	PSM Ambiguity	Annotated Sequence	Modifications	# Protein Groups	# Proteins	Master Protein Accessions	Protein Accessions	# Missed Cleavages	Charge	DeltaScore	DeltaCn	Rank	Search Engine Rank	m/z [Da]	MH+ [Da]	Theo. MH+ [Da]	DeltaM [ppm]	Deltam/z [Da]	Activation Type	MS Order	Isolation Interference [%]	Ion Inject Time [ms]	RT [min]	First Scan	Spectrum File	File ID	Quan Info	Ions Score	Identity Strict	Identity Relaxed	Expectation Value	Percolator q-Value	Percolator PEP	Precursor Abundance	Apex RT [min]
		FALSE	High	Mascot (A5)	Unambiguous	[R].GGSGGGGFGSQSLVGLGGYK.[S]		1	1	Q3TTY5	Q3TTY5	0	2	0.9815	0	1	1	871.435	1741.86	1741.85	7.36	0.00641	HCD (High Energy Collision Dissociation)	MS2	0	25	37.5051	21910	MS201900102_Con1.raw	F1		108	43	36	3.09272e-09	0	4.867e-06	6.74016e+06	37.63
		FALSE	High	Mascot (A5)	Unambiguous	[R].GGSGGGGFGSQSLVGLGGYK.[S]		1	1	Q3TTY5	Q3TTY5	0	2	0.9873	0	1	1	871.435	1741.86	1741.85	7.57	0.00659	HCD (High Energy Collision Dissociation)	MS2	24.2569	25	37.7696	22226	MS201900102_Con1.raw	F1		79	43	36	2.41233e-06	0	2.804e-05	6.74016e+06	37.63
	FALSE	High	[R].MSGDFSDNVSVSITSSTISSSVASK.[T]	1xOxidation [M1]		3.86508e-07	0	1	1	1	Q3TTY5	Q3TTY5 [512-536]	0	2509.16	0		No Quan Values	High	High	0	2.264e-07	118		R.MSGDFSDNVSVSITSSTISSSVASK.T	[512-536]		Not Used
		Checked	Confidence	Identifying Node	PSM Ambiguity	Annotated Sequence	Modifications	# Protein Groups	# Proteins	Master Protein Accessions	Protein Accessions	# Missed Cleavages	Charge	DeltaScore	DeltaCn	Rank	Search Engine Rank	m/z [Da]	MH+ [Da]	Theo. MH+ [Da]	DeltaM [ppm]	Deltam/z [Da]	Activation Type	MS Order	Isolation Interference [%]	Ion Inject Time [ms]	RT [min]	First Scan	Spectrum File	File ID	Quan Info	Ions Score	Identity Strict	Identity Relaxed	Expectation Value	Percolator q-Value	Percolator PEP	Precursor Abundance	Apex RT [min]
		FALSE	High	Mascot (A5)	Unambiguous	[R].mSGDFSDNVSVSITSSTISSSVASK.[T]	M1(Oxidation)	1	1	Q3TTY5	Q3TTY5	0	2	0.9661	0	1	1	1255.1	2509.18	2509.16	8.72	0.01095	HCD (High Energy Collision Dissociation)	MS2	55.2375	25	44.6717	30185	MS201900102_Con1.raw	F1		118	46	39	6.90382e-10	0	2.264e-07
	FALSE	High	[R].LDILAQEVNFLR.[T]			2.22947e-05	0	1	1	2	Q3TTY5	Q3TTY5 [324-335]	0	1430.8	0		No Quan Values	High	High	0	3.275e-05	108		R.LDILAQEVNFLR.T	[324-335]		Not Used
		Checked	Confidence	Identifying Node	PSM Ambiguity	Annotated Sequence	Modifications	# Protein Groups	# Proteins	Master Protein Accessions	Protein Accessions	# Missed Cleavages	Charge	DeltaScore	DeltaCn	Rank	Search Engine Rank	m/z [Da]	MH+ [Da]	Theo. MH+ [Da]	DeltaM [ppm]	Deltam/z [Da]	Activation Type	MS Order	Isolation Interference [%]	Ion Inject Time [ms]	RT [min]	First Scan	Spectrum File	File ID	Quan Info	Ions Score	Identity Strict	Identity Relaxed	Expectation Value	Percolator q-Value	Percolator PEP	Precursor Abundance	Apex RT [min]
		FALSE	High	Mascot (A5)	Unambiguous	[R].LDILAQEVNFLR.[T]		1	1	Q3TTY5	Q3TTY5	0	2	0.85	0	1	1	715.91	1430.81	1430.8	8.98	0.00642	HCD (High Energy Collision Dissociation)	MS2	0	25	59.5214	42091	MS201900102_Con1.raw	F1		80	37	30	6.02302e-07	0	1.493e-05	11848889	59.23
		FALSE	High	Mascot (A5)	Unambiguous	[R].LDILAQEVNFLR.[T]		1	1	Q3TTY5	Q3TTY5	0	2	0.8704	0	1	1	715.909	1430.81	1430.8	7.95	0.00569	HCD (High Energy Collision Dissociation)	MS2	0	25	58.9715	41734	MS201900102_Con1.raw	F1		108	37	30	9.4865e-10	0	3.275e-05	11848889	59.23
	FALSE	High	[R].NLDLDSIIAEVQNQYEMIAHK.[S]	1xOxidation [M17]		3.12164e-05	0	1	1	1	Q3TTY5	Q3TTY5 [363-383]	0	2460.21	0	100		High	High	0	2.11e-05	55	72.43	R.NLDLDSIIAEVQNQYEMIAHK.S	[363-383]		Used
		Checked	Confidence	Identifying Node	PSM Ambiguity	Annotated Sequence	Modifications	# Protein Groups	# Proteins	Master Protein Accessions	Protein Accessions	# Missed Cleavages	Charge	DeltaScore	DeltaCn	Rank	Search Engine Rank	m/z [Da]	MH+ [Da]	Theo. MH+ [Da]	DeltaM [ppm]	Deltam/z [Da]	Activation Type	MS Order	Isolation Interference [%]	Ion Inject Time [ms]	RT [min]	First Scan	Spectrum File	File ID	Quan Info	Ions Score	Identity Strict	Identity Relaxed	Expectation Value	Percolator q-Value	Percolator PEP	Precursor Abundance	Apex RT [min]
		FALSE	High	Mascot (A5)	Unambiguous	[R].NLDLDSIIAEVQNQYEmIAHK.[S]	M17(Oxidation)	1	1	Q3TTY5	Q3TTY5	0	3	1	0	1	1	820.747	2460.23	2460.21	7.48	0.00614	HCD (High Energy Collision Dissociation)	MS2	7.83037	14.402	72.4446	55665	MS201900102_Con1.raw	F1		55	44	37	0.000931788	0	2.11e-05	4.36102e+06	72.43
	FALSE	High	[R].NLDLDSIIAEVQNQYEMIAHK.[S]			0.000509566	0	1	1	1	Q3TTY5	Q3TTY5 [363-383]	0	2444.21	0		No Quan Values	High	High	0	0.0003785	56		R.NLDLDSIIAEVQNQYEMIAHK.S	[363-383]		Not Used
		Checked	Confidence	Identifying Node	PSM Ambiguity	Annotated Sequence	Modifications	# Protein Groups	# Proteins	Master Protein Accessions	Protein Accessions	# Missed Cleavages	Charge	DeltaScore	DeltaCn	Rank	Search Engine Rank	m/z [Da]	MH+ [Da]	Theo. MH+ [Da]	DeltaM [ppm]	Deltam/z [Da]	Activation Type	MS Order	Isolation Interference [%]	Ion Inject Time [ms]	RT [min]	First Scan	Spectrum File	File ID	Quan Info	Ions Score	Identity Strict	Identity Relaxed	Expectation Value	Percolator q-Value	Percolator PEP	Precursor Abundance	Apex RT [min]
		FALSE	High	Mascot (A5)	Unambiguous	[R].NLDLDSIIAEVQNQYEMIAHK.[S]		1	1	Q3TTY5	Q3TTY5	0	3	0.9821	0	1	1	815.416	2444.23	2444.21	8.25	0.00672	HCD (High Energy Collision Dissociation)	MS2	7.49821	25	72.5013	55723	MS201900102_Con1.raw	F1		56	43	36	0.000600247	0	0.0003785
	FALSE	High	[R].TSQESELNNMQDLVEDFK.[K]			0.000615767	0	1	1	1	Q3TTY5	Q3TTY5 [269-286]	0	2126.95	0	100		High	High	0	0.0004606	59	56.68	R.TSQESELNNMQDLVEDFK.K	[269-286]		Used
		Checked	Confidence	Identifying Node	PSM Ambiguity	Annotated Sequence	Modifications	# Protein Groups	# Proteins	Master Protein Accessions	Protein Accessions	# Missed Cleavages	Charge	DeltaScore	DeltaCn	Rank	Search Engine Rank	m/z [Da]	MH+ [Da]	Theo. MH+ [Da]	DeltaM [ppm]	Deltam/z [Da]	Activation Type	MS Order	Isolation Interference [%]	Ion Inject Time [ms]	RT [min]	First Scan	Spectrum File	File ID	Quan Info	Ions Score	Identity Strict	Identity Relaxed	Expectation Value	Percolator q-Value	Percolator PEP	Precursor Abundance	Apex RT [min]
		FALSE	High	Mascot (A5)	Unambiguous	[R].TSQESELNNMQDLVEDFK.[K]		1	1	Q3TTY5	Q3TTY5	0	2	1	0	1	1	1063.99	2126.98	2126.95	9.63	0.01025	HCD (High Energy Collision Dissociation)	MS2	54.4528	23.086	56.6938	39300	MS201900102_Con1.raw	F1		59	45	38	0.000445031	0	0.0004606	628633	56.68
	FALSE	High	[R].TSQESELNNMQDLVEDFKK.[K]			8.93718e-05	0	1	1	1	Q3TTY5	Q3TTY5 [269-287]	1	2255.05	0		No Quan Values	High	High	0	6.281e-05	50		R.TSQESELNNMQDLVEDFKK.K	[269-287]		Not Used
		Checked	Confidence	Identifying Node	PSM Ambiguity	Annotated Sequence	Modifications	# Protein Groups	# Proteins	Master Protein Accessions	Protein Accessions	# Missed Cleavages	Charge	DeltaScore	DeltaCn	Rank	Search Engine Rank	m/z [Da]	MH+ [Da]	Theo. MH+ [Da]	DeltaM [ppm]	Deltam/z [Da]	Activation Type	MS Order	Isolation Interference [%]	Ion Inject Time [ms]	RT [min]	First Scan	Spectrum File	File ID	Quan Info	Ions Score	Identity Strict	Identity Relaxed	Expectation Value	Percolator q-Value	Percolator PEP	Precursor Abundance	Apex RT [min]
		FALSE	High	Mascot (A5)	Unambiguous	[R].TSQESELNNMQDLVEDFKK.[K]		1	1	Q3TTY5	Q3TTY5	1	3	1	0	1	1	752.363	2255.07	2255.05	10.65	0.00801	HCD (High Energy Collision Dissociation)	MS2	38.2986	25	47.1022	32978	MS201900102_Con1.raw	F1		50	45	38	0.00345366	0	6.281e-05	4204246	47.29
	FALSE	High	[R].TTNLDPIFQAYIGMLK.[K]			7.46634e-06	0	1	1	1	Q3TTY5	Q3TTY5 [243-258]	0	1824.96	0	100		High	High	0	4.826e-06	45	70.48	R.TTNLDPIFQAYIGMLK.K	[243-258]		Used
		Checked	Confidence	Identifying Node	PSM Ambiguity	Annotated Sequence	Modifications	# Protein Groups	# Proteins	Master Protein Accessions	Protein Accessions	# Missed Cleavages	Charge	DeltaScore	DeltaCn	Rank	Search Engine Rank	m/z [Da]	MH+ [Da]	Theo. MH+ [Da]	DeltaM [ppm]	Deltam/z [Da]	Activation Type	MS Order	Isolation Interference [%]	Ion Inject Time [ms]	RT [min]	First Scan	Spectrum File	File ID	Quan Info	Ions Score	Identity Strict	Identity Relaxed	Expectation Value	Percolator q-Value	Percolator PEP	Precursor Abundance	Apex RT [min]
		FALSE	High	Mascot (A5)	Unambiguous	[R].TTNLDPIFQAYIGMLK.[K]		1	1	Q3TTY5	Q3TTY5	0	2	1	0	1	1	912.989	1824.97	1824.96	7.38	0.00673	HCD (High Energy Collision Dissociation)	MS2	8.46022	25	70.3801	53300	MS201900102_Con1.raw	F1		45	40	33	0.00407573	0	4.826e-06	2.25097e+06	70.48
	FALSE	High	[R].TTNLDPIFQAYIGMLK.[K]	1xOxidation [M14]		0.000612538	0	1	1	2	Q3TTY5	Q3TTY5 [243-258]	0	1840.95	0	100		High	High	0	0.000459	38	65.43	R.TTNLDPIFQAYIGMLK.K	[243-258]		Used
		Checked	Confidence	Identifying Node	PSM Ambiguity	Annotated Sequence	Modifications	# Protein Groups	# Proteins	Master Protein Accessions	Protein Accessions	# Missed Cleavages	Charge	DeltaScore	DeltaCn	Rank	Search Engine Rank	m/z [Da]	MH+ [Da]	Theo. MH+ [Da]	DeltaM [ppm]	Deltam/z [Da]	Activation Type	MS Order	Isolation Interference [%]	Ion Inject Time [ms]	RT [min]	First Scan	Spectrum File	File ID	Quan Info	Ions Score	Identity Strict	Identity Relaxed	Expectation Value	Percolator q-Value	Percolator PEP	Precursor Abundance	Apex RT [min]
		FALSE	High	Mascot (A5)	Unambiguous	[R].TTNLDPIFQAYIGmLK.[K]	M14(Oxidation)	1	1	Q3TTY5	Q3TTY5	0	2	1	0	1	1	920.988	1840.97	1840.95	9.01	0.0083	HCD (High Energy Collision Dissociation)	MS2	0	25	65.3958	48164	MS201900102_Con1.raw	F1		38	41	34	0.0216321	0	0.000459	915539	65.43
		FALSE	High	Mascot (A5)	Unambiguous	[R].TTNLDPIFQAYIGmLK.[K]	M14(Oxidation)	1	1	Q3TTY5	Q3TTY5	0	2	1	0	1	1	920.987	1840.97	1840.95	8.02	0.00738	HCD (High Energy Collision Dissociation)	MS2	0	25	64.1563	46988	MS201900102_Con1.raw	F1		32	41	34	0.0820903	0.0004707	0.01991	537882	64.37
	FALSE	High	[R].FGGGSGFGGGGFGGGSFGGGR.[F]			1.50952e-11	0	1	1	2	Q3TTY5	Q3TTY5 [132-152]	0	1735.76	0	100		High	High	0	6.261e-12	113	38.5	R.FGGGSGFGGGGFGGGSFGGGR.F	[132-152]		Used
		Checked	Confidence	Identifying Node	PSM Ambiguity	Annotated Sequence	Modifications	# Protein Groups	# Proteins	Master Protein Accessions	Protein Accessions	# Missed Cleavages	Charge	DeltaScore	DeltaCn	Rank	Search Engine Rank	m/z [Da]	MH+ [Da]	Theo. MH+ [Da]	DeltaM [ppm]	Deltam/z [Da]	Activation Type	MS Order	Isolation Interference [%]	Ion Inject Time [ms]	RT [min]	First Scan	Spectrum File	File ID	Quan Info	Ions Score	Identity Strict	Identity Relaxed	Expectation Value	Percolator q-Value	Percolator PEP	Precursor Abundance	Apex RT [min]
		FALSE	High	Mascot (A5)	Unambiguous	[R].FGGGSGFGGGGFGGGSFGGGR.[F]		1	1	Q3TTY5	Q3TTY5	0	2	0.9823	0	1	1	868.39	1735.77	1735.76	9.06	0.00786	HCD (High Energy Collision Dissociation)	MS2	17.0994	16.982	38.5691	23155	MS201900102_Con1.raw	F1		113	44	37	1.24378e-09	0	6.261e-12	11600953	38.5
		FALSE	High	Mascot (A5)	Unambiguous	[R].FGGGSGFGGGGFGGGSFGGGR.[F]		1	1	Q3TTY5	Q3TTY5	0	2	1	0	1	1	868.393	1735.78	1735.76	12.5	0.01085	HCD (High Energy Collision Dissociation)	MS2	52.405	25	39.0493	23698	MS201900102_Con1.raw	F1		15	44	37	8.89845	0.004207	0.1515	11600953	38.5
	FALSE	High	[R].TSQESELNNMQDLVEDFKK.[K]	1xOxidation [M10]		0.00272589	0.000581891	1	1	1	Q3TTY5	Q3TTY5 [269-287]	1	2271.04	0		No Quan Values	High	High	0.0004707	0.002142	19		R.TSQESELNNMQDLVEDFKK.K	[269-287]		Not Used
		Checked	Confidence	Identifying Node	PSM Ambiguity	Annotated Sequence	Modifications	# Protein Groups	# Proteins	Master Protein Accessions	Protein Accessions	# Missed Cleavages	Charge	DeltaScore	DeltaCn	Rank	Search Engine Rank	m/z [Da]	MH+ [Da]	Theo. MH+ [Da]	DeltaM [ppm]	Deltam/z [Da]	Activation Type	MS Order	Isolation Interference [%]	Ion Inject Time [ms]	RT [min]	First Scan	Spectrum File	File ID	Quan Info	Ions Score	Identity Strict	Identity Relaxed	Expectation Value	Percolator q-Value	Percolator PEP	Precursor Abundance	Apex RT [min]
		FALSE	High	Mascot (A5)	Unambiguous	[R].TSQESELNNmQDLVEDFKK.[K]	M10(Oxidation)	1	1	Q3TTY5	Q3TTY5	1	3	1	0	1	1	757.695	2271.07	2271.04	11.26	0.00852	HCD (High Energy Collision Dissociation)	MS2	0	25	31.5534	16433	MS201900102_Con1.raw	F1		19	45	38	4.18911	0.0004707	0.002142	1.74214e+06	31.58
	FALSE	High	[K].YEELQVTAVK.[H]			0.00501421	0.000581891	1	1	2	Q3TTY5	Q3TTY5 [396-405]	0	1179.63	0		No Quan Values	High	High	0.0004707	0.004038	51		K.YEELQVTAVK.H	[396-405]		Not Used
		Checked	Confidence	Identifying Node	PSM Ambiguity	Annotated Sequence	Modifications	# Protein Groups	# Proteins	Master Protein Accessions	Protein Accessions	# Missed Cleavages	Charge	DeltaScore	DeltaCn	Rank	Search Engine Rank	m/z [Da]	MH+ [Da]	Theo. MH+ [Da]	DeltaM [ppm]	Deltam/z [Da]	Activation Type	MS Order	Isolation Interference [%]	Ion Inject Time [ms]	RT [min]	First Scan	Spectrum File	File ID	Quan Info	Ions Score	Identity Strict	Identity Relaxed	Expectation Value	Percolator q-Value	Percolator PEP	Precursor Abundance	Apex RT [min]
		FALSE	High	Mascot (A5)	Unambiguous	[K].YEELQVTAVK.[H]		1	1	Q3TTY5	Q3TTY5	0	2	0.8431	0	1	1	590.321	1179.64	1179.63	8.55	0.00504	HCD (High Energy Collision Dissociation)	MS2	49.1567	14.453	24.3566	11234	MS201900102_Con1.raw	F1		51	39	32	0.000653516	0.0004707	0.004038	11188107	24.47
		FALSE	High	Mascot (A5)	Selected	[K].YEELQVTAVK.[H]		1	1	Q3TTY5	Q3TTY5	0	2		0.037	2	2	590.309	1179.61	1179.63	-12.56	-0.00741	HCD (High Energy Collision Dissociation)	MS2	0	15.181	26.5192	12567	MS201900102_Con1.raw	F1		26	40	33	0.29585	0.0004707	0.02436	18569276	26.15
	FALSE	High	[K].GVQDSIADAEQRGEHAIK.[D]			0.0134603	0.000581891	1	1	1	Q3TTY5	Q3TTY5 [440-457]	1	1923.95	0		No Quan Values	High	High	0.0004707	0.01115	17		K.GVQDSIADAEQRGEHAIK.D	[440-457]		Not Used
		Checked	Confidence	Identifying Node	PSM Ambiguity	Annotated Sequence	Modifications	# Protein Groups	# Proteins	Master Protein Accessions	Protein Accessions	# Missed Cleavages	Charge	DeltaScore	DeltaCn	Rank	Search Engine Rank	m/z [Da]	MH+ [Da]	Theo. MH+ [Da]	DeltaM [ppm]	Deltam/z [Da]	Activation Type	MS Order	Isolation Interference [%]	Ion Inject Time [ms]	RT [min]	First Scan	Spectrum File	File ID	Quan Info	Ions Score	Identity Strict	Identity Relaxed	Expectation Value	Percolator q-Value	Percolator PEP	Precursor Abundance	Apex RT [min]
		FALSE	High	Mascot (A5)	Unambiguous	[K].GVQDSIADAEQRGEHAIK.[D]		1	1	Q3TTY5	Q3TTY5	1	3	0.8824	0	1	1	641.994	1923.97	1923.95	8.68	0.00557	HCD (High Energy Collision Dissociation)	MS2	38.6449	19.242	29.2315	14448	MS201900102_Con1.raw	F1		17	43	36	4.19607	0.0004707	0.01115	1.20876e+06	29.24
	FALSE	High	[R].LLRDYQELMNTK.[L]			0.0189273	0.000581891	1	1	2	Q3TTY5	Q3TTY5 [480-491]	1	1523.79	0	100		High	High	0.0004707	0.01593	32	30.47	R.LLRDYQELMNTK.L	[480-491]		Used
		Checked	Confidence	Identifying Node	PSM Ambiguity	Annotated Sequence	Modifications	# Protein Groups	# Proteins	Master Protein Accessions	Protein Accessions	# Missed Cleavages	Charge	DeltaScore	DeltaCn	Rank	Search Engine Rank	m/z [Da]	MH+ [Da]	Theo. MH+ [Da]	DeltaM [ppm]	Deltam/z [Da]	Activation Type	MS Order	Isolation Interference [%]	Ion Inject Time [ms]	RT [min]	First Scan	Spectrum File	File ID	Quan Info	Ions Score	Identity Strict	Identity Relaxed	Expectation Value	Percolator q-Value	Percolator PEP	Precursor Abundance	Apex RT [min]
		FALSE	High	Mascot (A5)	Unambiguous	[R].LLRDYQELMNTK.[L]		1	1	Q3TTY5	Q3TTY5	1	3	0.6957	0	1	1	508.605	1523.8	1523.79	7.71	0.00392	HCD (High Energy Collision Dissociation)	MS2	40.4141	25	30.368	15434	MS201900102_Con1.raw	F1		23	40	33	0.656693	0.0004707	0.02444	5007335	30.47
		FALSE	High	Mascot (A5)	Unambiguous	[R].LLRDYQELMNTK.[L]		1	1	Q3TTY5	Q3TTY5	1	3	0.8438	0	1	1	508.605	1523.8	1523.79	7.35	0.00373	HCD (High Energy Collision Dissociation)	MS2	0	16.839	30.3896	15453	MS201900102_Con1.raw	F1		32	40	33	0.0706766	0.0004707	0.01593	5007335	30.47
	FALSE	High	[K].LSLDVEIATYR.[KQ]			0.00720515	0.000581891	3	3	1	Q3TTY5; Q6IFZ9; Q6IFZ6	Q3TTY5 [492-502]; Q6IFZ9 [399-409]; Q6IFZ6 [460-470]	0	1279.69	0		No Quan Values	High	High	0.0004707	0.005866	35		K.LSLDVEIATYR.K	[492-502]		Not Used
		Checked	Confidence	Identifying Node	PSM Ambiguity	Annotated Sequence	Modifications	# Protein Groups	# Proteins	Master Protein Accessions	Protein Accessions	# Missed Cleavages	Charge	DeltaScore	DeltaCn	Rank	Search Engine Rank	m/z [Da]	MH+ [Da]	Theo. MH+ [Da]	DeltaM [ppm]	Deltam/z [Da]	Activation Type	MS Order	Isolation Interference [%]	Ion Inject Time [ms]	RT [min]	First Scan	Spectrum File	File ID	Quan Info	Ions Score	Identity Strict	Identity Relaxed	Expectation Value	Percolator q-Value	Percolator PEP	Precursor Abundance	Apex RT [min]
		FALSE	High	Mascot (A5)	Unambiguous	[K].LSLDVEIATYR.[KQ]		3	3	Q3TTY5; Q6IFZ9; Q6IFZ6	Q3TTY5; Q6IFZ9; Q6IFZ6	0	2	1	0	1	1	640.354	1279.7	1279.69	8.31	0.00532	HCD (High Energy Collision Dissociation)	MS2	17.3963	25	45.1961	30763	MS201900102_Con1.raw	F1		35	38	31	0.0234136	0.0004707	0.005866
	FALSE	High	[K].VDPEIQNVK.[S]			0.061547	0.00154131	1	1	1	Q3TTY5	Q3TTY5 [188-196]	0	1041.56	0	100		High	High	0.001254	0.05387	42	16.91	K.VDPEIQNVK.S	[188-196]		Used
		Checked	Confidence	Identifying Node	PSM Ambiguity	Annotated Sequence	Modifications	# Protein Groups	# Proteins	Master Protein Accessions	Protein Accessions	# Missed Cleavages	Charge	DeltaScore	DeltaCn	Rank	Search Engine Rank	m/z [Da]	MH+ [Da]	Theo. MH+ [Da]	DeltaM [ppm]	Deltam/z [Da]	Activation Type	MS Order	Isolation Interference [%]	Ion Inject Time [ms]	RT [min]	First Scan	Spectrum File	File ID	Quan Info	Ions Score	Identity Strict	Identity Relaxed	Expectation Value	Percolator q-Value	Percolator PEP	Precursor Abundance	Apex RT [min]
		FALSE	High	Mascot (A5)	Unambiguous	[K].VDPEIQNVK.[S]		1	1	Q3TTY5	Q3TTY5	0	2	0.881	0	1	1	521.286	1041.56	1041.56	6.6	0.00344	HCD (High Energy Collision Dissociation)	MS2	0	7.05	16.8737	6181	MS201900102_Con1.raw	F1		42	38	31	0.00491625	0.001254	0.05387	229938384	16.91
	FALSE	High	[R].DYQELMNTK.[L]	1xOxidation [M6]		0.07432	0.00154131	1	1	5	Q3TTY5	Q3TTY5 [483-491]	0	1157.51	0	100		High	High	0.001254	0.06768	26	17.46	R.DYQELMNTK.L	[483-491]		Used
		Checked	Confidence	Identifying Node	PSM Ambiguity	Annotated Sequence	Modifications	# Protein Groups	# Proteins	Master Protein Accessions	Protein Accessions	# Missed Cleavages	Charge	DeltaScore	DeltaCn	Rank	Search Engine Rank	m/z [Da]	MH+ [Da]	Theo. MH+ [Da]	DeltaM [ppm]	Deltam/z [Da]	Activation Type	MS Order	Isolation Interference [%]	Ion Inject Time [ms]	RT [min]	First Scan	Spectrum File	File ID	Quan Info	Ions Score	Identity Strict	Identity Relaxed	Expectation Value	Percolator q-Value	Percolator PEP	Precursor Abundance	Apex RT [min]
		FALSE	High	Mascot (A5)	Unambiguous	[R].DYQELmNTK.[L]	M6(Oxidation)	1	1	Q3TTY5	Q3TTY5	0	2	1	0	1	1	579.266	1157.52	1157.51	9.08	0.00526	HCD (High Energy Collision Dissociation)	MS2	35.5857	25	18.3314	7588	MS201900102_Con1.raw	F1		22	40	33	0.780273	0.001254	0.06533	123462840	17.46
		FALSE	High	Mascot (A5)	Unambiguous	[R].DYQELmNTK.[L]	M6(Oxidation)	1	1	Q3TTY5	Q3TTY5	0	2	1	0	1	1	579.266	1157.52	1157.51	8.24	0.00477	HCD (High Energy Collision Dissociation)	MS2	6.07605	8.453	17.6285	6797	MS201900102_Con1.raw	F1		26	40	33	0.307918	0.001254	0.06768	123462840	17.46
		FALSE	High	Mascot (A5)	Unambiguous	[R].DYQELmNTK.[L]	M6(Oxidation)	1	1	Q3TTY5	Q3TTY5	0	2	1	0	1	1	579.265	1157.52	1157.51	7.92	0.00458	HCD (High Energy Collision Dissociation)	MS2	0	16.127	17.1882	6379	MS201900102_Con1.raw	F1		18	40	33	1.87682	0.002787	0.1036	123042232	17.33
		FALSE	High	Mascot (A5)	Unambiguous	[R].DYQELmNTK.[L]	M6(Oxidation)	1	1	Q3TTY5	Q3TTY5	0	2		0	1	1	579.265	1157.52	1157.51	8.13	0.00471	HCD (High Energy Collision Dissociation)	MS2	62.201	18.209	18.806	8138	MS201900102_Con1.raw	F1		0	40	33	113.615	0.003883	0.1237
		FALSE	High	Mascot (A5)	Unambiguous	[R].DYQELmNTK.[L]	M6(Oxidation)	1	1	Q3TTY5	Q3TTY5	0	2	1	0	1	1	579.266	1157.52	1157.51	8.98	0.0052	HCD (High Energy Collision Dissociation)	MS2	0	25	17.7062	6881	MS201900102_Con1.raw	F1		18	40	33	2.03878	0.003883	0.1304	123462840	17.46
	FALSE	High	[R].TKWELLQQLDVGSR.[T]			0.0624989	0.00154131	1	1	1	Q3TTY5	Q3TTY5 [229-242]	1	1672.9	0	100		High	High	0.001254	0.05449	35	42.85	R.TKWELLQQLDVGSR.T	[229-242]		Used
		Checked	Confidence	Identifying Node	PSM Ambiguity	Annotated Sequence	Modifications	# Protein Groups	# Proteins	Master Protein Accessions	Protein Accessions	# Missed Cleavages	Charge	DeltaScore	DeltaCn	Rank	Search Engine Rank	m/z [Da]	MH+ [Da]	Theo. MH+ [Da]	DeltaM [ppm]	Deltam/z [Da]	Activation Type	MS Order	Isolation Interference [%]	Ion Inject Time [ms]	RT [min]	First Scan	Spectrum File	File ID	Quan Info	Ions Score	Identity Strict	Identity Relaxed	Expectation Value	Percolator q-Value	Percolator PEP	Precursor Abundance	Apex RT [min]
		FALSE	High	Mascot (A5)	Unambiguous	[R].TKWELLQQLDVGSR.[T]		1	1	Q3TTY5	Q3TTY5	1	3	1	0	1	1	558.309	1672.91	1672.9	6.57	0.00367	HCD (High Energy Collision Dissociation)	MS2	43.5983	25	42.6632	27949	MS201900102_Con1.raw	F1		35	39	32	0.0290328	0.001254	0.05449	5688679	42.85
	FALSE	High	[R].TSAENDFVTIKK.[D]			0.0572858	0.00154131	1	1	1	Q3TTY5	Q3TTY5 [297-308]	1	1352.71	0	100		High	High	0.001254	0.04997	26	17.8	R.TSAENDFVTIKK.D	[297-308]		Used
		Checked	Confidence	Identifying Node	PSM Ambiguity	Annotated Sequence	Modifications	# Protein Groups	# Proteins	Master Protein Accessions	Protein Accessions	# Missed Cleavages	Charge	DeltaScore	DeltaCn	Rank	Search Engine Rank	m/z [Da]	MH+ [Da]	Theo. MH+ [Da]	DeltaM [ppm]	Deltam/z [Da]	Activation Type	MS Order	Isolation Interference [%]	Ion Inject Time [ms]	RT [min]	First Scan	Spectrum File	File ID	Quan Info	Ions Score	Identity Strict	Identity Relaxed	Expectation Value	Percolator q-Value	Percolator PEP	Precursor Abundance	Apex RT [min]
		FALSE	High	Mascot (A5)	Unambiguous	[R].TSAENDFVTIKK.[D]		1	1	Q3TTY5	Q3TTY5	1	2	1	0	1	1	676.862	1352.72	1352.71	8.66	0.00586	HCD (High Energy Collision Dissociation)	MS2		16.444	17.7116	6888	MS201900102_Con1.raw	F1		26	39	32	0.222634	0.001254	0.04997	4.95261e+06	17.8
	FALSE	High	[R].DYQELMNTK.[L]			0.128571	0.00390307	1	1	2	Q3TTY5	Q3TTY5 [483-491]	0	1141.52	0	100		High	High	0.003159	0.1149	16	26.66	R.DYQELMNTK.L	[483-491]		Used
		Checked	Confidence	Identifying Node	PSM Ambiguity	Annotated Sequence	Modifications	# Protein Groups	# Proteins	Master Protein Accessions	Protein Accessions	# Missed Cleavages	Charge	DeltaScore	DeltaCn	Rank	Search Engine Rank	m/z [Da]	MH+ [Da]	Theo. MH+ [Da]	DeltaM [ppm]	Deltam/z [Da]	Activation Type	MS Order	Isolation Interference [%]	Ion Inject Time [ms]	RT [min]	First Scan	Spectrum File	File ID	Quan Info	Ions Score	Identity Strict	Identity Relaxed	Expectation Value	Percolator q-Value	Percolator PEP	Precursor Abundance	Apex RT [min]
		FALSE	High	Mascot (A5)	Unambiguous	[R].DYQELMNTK.[L]		1	1	Q3TTY5	Q3TTY5	0	2	1	0	1	1	571.268	1141.53	1141.52	8.07	0.00461	HCD (High Energy Collision Dissociation)	MS2	50.361	2.823	26.8756	12807	MS201900102_Con1.raw	F1		16	40	33	3.34827	0.003159	0.1149	126985840	26.66
		FALSE	High	Mascot (A5)	Unambiguous	[R].DYQELMNTK.[L]		1	1	Q3TTY5	Q3TTY5	0	2	1	0	1	1	571.267	1141.53	1141.52	6.57	0.00375	HCD (High Energy Collision Dissociation)	MS2	71.2246	5.487	26.451	12519	MS201900102_Con1.raw	F1		8	40	33	20.8812	0.007805	0.1962	126985840	26.66
FALSE	High	Master Protein	O35737	Heterogeneous nuclear ribonucleoprotein H OS=Mus musculus OX=10090 GN=Hnrnph1 PE=1 SV=3	0	85.22	38	11	87	5	1	449	49.2	6.3	2310	11	metabolic process;regulation of biological process	cytosol;membrane;nucleus;spliceosomal complex	protein binding;RNA binding	Pf00076, Pf08080, Pf14259	59013	ENSMUSG00000007850.16	Hnrnph1	11	mRNA processing		1	100	High	Phospho [S104; Y266]
	Checked	Confidence	Annotated Sequence	Modifications	Modifications in Master Proteins	Qvality PEP	Qvality q-value	# Protein Groups	# Proteins	# PSMs	Master Protein Accessions	Positions in Master Proteins	# Missed Cleavages	Theo. MH+ [Da]	# Razor Quan Results	Abundances (Scaled): F1: Sample	Quan Info	Found in Sample: [S1] F1: Sample	Confidence (by Search Engine): Mascot	Percolator q-Value (by Search Engine): Mascot	Percolator PEP (by Search Engine): Mascot	Ions Score (by Search Engine): Mascot	Top Apex RT [min]	Sequence in Protein	Positions in Protein	Peptide Group Modifications in Protein	Quan Usage
	FALSE	High	[K].HTGPNSPDTANDGFVR.[L]			1.214e-08	0	2	2	2	P70333; O35737	P70333 [99-114]; O35737 [99-114]	0	1684.77	0		No Quan Values	High	High	0	6.304e-09	115		K.HTGPNSPDTANDGFVR.L	[99-114]		Not Used
		Checked	Confidence	Identifying Node	PSM Ambiguity	Annotated Sequence	Modifications	# Protein Groups	# Proteins	Master Protein Accessions	Protein Accessions	# Missed Cleavages	Charge	DeltaScore	DeltaCn	Rank	Search Engine Rank	m/z [Da]	MH+ [Da]	Theo. MH+ [Da]	DeltaM [ppm]	Deltam/z [Da]	Activation Type	MS Order	Isolation Interference [%]	Ion Inject Time [ms]	RT [min]	First Scan	Spectrum File	File ID	Quan Info	Ions Score	Identity Strict	Identity Relaxed	Expectation Value	Percolator q-Value	Percolator PEP	Precursor Abundance	Apex RT [min]
		FALSE	High	Mascot (A5)	Unambiguous	[K].HTGPNSPDTANDGFVR.[L]		2	2	P70333; O35737	P70333; O35737	0	2	0.9826	0	1	1	842.895	1684.78	1684.77	9.63	0.00812	HCD (High Energy Collision Dissociation)	MS2	0	12.965	16.6333	6097	MS201900102_Con1.raw	F1		115	43	36	6.78922e-10	0	6.304e-09	30384434	16.71
		FALSE	High	Mascot (A5)	Unambiguous	[K].HTGPNSPDTANDGFVR.[L]		2	2	P70333; O35737	P70333; O35737	0	3	0.9333	0	1	1	562.266	1684.78	1684.77	9.52	0.00534	HCD (High Energy Collision Dissociation)	MS2	55.3992	16.857	17.5516	6717	MS201900102_Con1.raw	F1		30	43	36	0.217831	0.0004707	0.004049
	FALSE	High	[R].RGAYGGGYGGYDDYNGYNDGYGFGSDR.[F]			0.000288762	0	1	1	2	O35737	O35737 [233-259]	1	2873.15	0		No Quan Values	High	High	0	0.0002105	34		R.RGAYGGGYGGYDDYNGYNDGYGFGSDR.F	[233-259]		Not Used
		Checked	Confidence	Identifying Node	PSM Ambiguity	Annotated Sequence	Modifications	# Protein Groups	# Proteins	Master Protein Accessions	Protein Accessions	# Missed Cleavages	Charge	DeltaScore	DeltaCn	Rank	Search Engine Rank	m/z [Da]	MH+ [Da]	Theo. MH+ [Da]	DeltaM [ppm]	Deltam/z [Da]	Activation Type	MS Order	Isolation Interference [%]	Ion Inject Time [ms]	RT [min]	First Scan	Spectrum File	File ID	Quan Info	Ions Score	Identity Strict	Identity Relaxed	Expectation Value	Percolator q-Value	Percolator PEP	Precursor Abundance	Apex RT [min]
		FALSE	High	Mascot (A5)	Unambiguous	[R].RGAYGGGYGGYDDYNGYNDGYGFGSDR.[F]		1	1	O35737	O35737	1	3	1	0	1	1	958.394	2873.17	2873.15	7.69	0.00736	HCD (High Energy Collision Dissociation)	MS2	38.4747	25	36.8184	21099	MS201900102_Con1.raw	F1		34	46	39	0.176969	0	0.0002105	1.25654e+06	36.86
		FALSE	High	Mascot (A5)	Unambiguous	[R].RGAYGGGYGGYDDYNGYNDGYGFGSDR.[F]		1	1	O35737	O35737	1	3	1	0	1	1	958.393	2873.17	2873.15	6.73	0.00645	HCD (High Energy Collision Dissociation)	MS2	36.8487	25	37.4213	21809	MS201900102_Con1.raw	F1		25	46	39	1.6439	0.0004707	0.03066	1.25654e+06	36.86
	FALSE	High	[R].GAYGGGYGGYDDYNGYNDGYGFGSDR.[F]			8.32985e-07	0	1	1	3	O35737	O35737 [234-259]	0	2717.04	0	100		High	High	0	5.268e-07	89	43.53	R.GAYGGGYGGYDDYNGYNDGYGFGSDR.F	[234-259]		Used
		Checked	Confidence	Identifying Node	PSM Ambiguity	Annotated Sequence	Modifications	# Protein Groups	# Proteins	Master Protein Accessions	Protein Accessions	# Missed Cleavages	Charge	DeltaScore	DeltaCn	Rank	Search Engine Rank	m/z [Da]	MH+ [Da]	Theo. MH+ [Da]	DeltaM [ppm]	Deltam/z [Da]	Activation Type	MS Order	Isolation Interference [%]	Ion Inject Time [ms]	RT [min]	First Scan	Spectrum File	File ID	Quan Info	Ions Score	Identity Strict	Identity Relaxed	Expectation Value	Percolator q-Value	Percolator PEP	Precursor Abundance	Apex RT [min]
		FALSE	High	Mascot (A5)	Unambiguous	[R].GAYGGGYGGYDDYNGYNDGYGFGSDR.[F]		1	1	O35737	O35737	0	2	1	0	1	1	1359.04	2717.07	2717.04	10.24	0.01391	HCD (High Energy Collision Dissociation)	MS2	0	25	43.3684	28773	MS201900102_Con1.raw	F1		89	45	38	4.81612e-07	0	5.268e-07	6.31297e+06	43.53
		FALSE	High	Mascot (A5)	Unambiguous	[R].GAYGGGYGGYDDYNGYNDGYGFGSDR.[F]		1	1	O35737	O35737	0	2	1	0	1	1	1359.03	2717.06	2717.04	6.19	0.00841	HCD (High Energy Collision Dissociation)	MS2	0	25	44.7513	30276	MS201900102_Con1.raw	F1		55	45	38	0.00102824	0	4.991e-07
		FALSE	High	Mascot (A5)	Unambiguous	[R].GAYGGGYGGYDDYNGYNDGYGFGSDR.[F]		1	1	O35737	O35737	0	2	1	0	1	1	1359.03	2717.06	2717.04	6.37	0.00866	HCD (High Energy Collision Dissociation)	MS2	56.1686	25	43.9364	29448	MS201900102_Con1.raw	F1		31	45	38	0.279082	0.003883	0.1328	6.31297e+06	43.53
	FALSE	High	[K].SNNVEMDWVLK.[H]			0.00139107	0	1	1	4	O35737	O35737 [88-98]	0	1334.64	0	100		High	High	0	0.001073	57	40.94	K.SNNVEMDWVLK.H	[88-98]		Used
		Checked	Confidence	Identifying Node	PSM Ambiguity	Annotated Sequence	Modifications	# Protein Groups	# Proteins	Master Protein Accessions	Protein Accessions	# Missed Cleavages	Charge	DeltaScore	DeltaCn	Rank	Search Engine Rank	m/z [Da]	MH+ [Da]	Theo. MH+ [Da]	DeltaM [ppm]	Deltam/z [Da]	Activation Type	MS Order	Isolation Interference [%]	Ion Inject Time [ms]	RT [min]	First Scan	Spectrum File	File ID	Quan Info	Ions Score	Identity Strict	Identity Relaxed	Expectation Value	Percolator q-Value	Percolator PEP	Precursor Abundance	Apex RT [min]
		FALSE	High	Mascot (A5)	Unambiguous	[K].SNNVEMDWVLK.[H]		1	1	O35737	O35737	0	2	1	0	1	1	667.829	1334.65	1334.64	7.23	0.00482	HCD (High Energy Collision Dissociation)	MS2	28.1255	25	40.7121	25691	MS201900102_Con1.raw	F1		57	42	35	0.000352839	0	0.001073	56182492	40.94
		FALSE	High	Mascot (A5)	Unambiguous	[K].SNNVEMDWVLK.[H]		1	1	O35737	O35737	0	2	1	0	1	1	667.83	1334.65	1334.64	8.88	0.00592	HCD (High Energy Collision Dissociation)	MS2	6.30215	8.406	41.1356	26180	MS201900102_Con1.raw	F1		42	41	34	0.00934141	0.0004707	0.007223	56182492	40.94
		FALSE	High	Mascot (A5)	Unambiguous	[K].SNNVEMDWVLK.[H]		1	1	O35737	O35737	0	2	1	0	1	1	667.83	1334.65	1334.64	8.23	0.0055	HCD (High Energy Collision Dissociation)	MS2	31.6091	25	41.7515	26866	MS201900102_Con1.raw	F1		9	42	35	21.836	0.0004707	0.02677	56182492	40.94
		FALSE	High	Mascot (A5)	Unambiguous	[K].SNNVEMDWVLK.[H]		1	1	O35737	O35737	0	2	1	0	1	1	667.829	1334.65	1334.64	8.05	0.00537	HCD (High Energy Collision Dissociation)	MS2	17.7924	25	37.8808	22359	MS201900102_Con1.raw	F1		19	42	35	2.05925	0.0004707	0.004857	519729	37.83
	FALSE	High	[R].STGEAFVQFASQEIAEK.[A]			0.000220829	0	2	2	2	P70333; O35737	P70333 [151-167]; O35737 [151-167]	0	1841.89	0	100	Shared	High	High	0	0.0001595	55	49.37	R.STGEAFVQFASQEIAEK.A	[151-167]		Not Used
		Checked	Confidence	Identifying Node	PSM Ambiguity	Annotated Sequence	Modifications	# Protein Groups	# Proteins	Master Protein Accessions	Protein Accessions	# Missed Cleavages	Charge	DeltaScore	DeltaCn	Rank	Search Engine Rank	m/z [Da]	MH+ [Da]	Theo. MH+ [Da]	DeltaM [ppm]	Deltam/z [Da]	Activation Type	MS Order	Isolation Interference [%]	Ion Inject Time [ms]	RT [min]	First Scan	Spectrum File	File ID	Quan Info	Ions Score	Identity Strict	Identity Relaxed	Expectation Value	Percolator q-Value	Percolator PEP	Precursor Abundance	Apex RT [min]
		FALSE	High	Mascot (A5)	Unambiguous	[R].STGEAFVQFASQEIAEK.[A]		2	2	P70333; O35737	P70333; O35737	0	2	1	0	1	1	921.455	1841.9	1841.89	6.33	0.00583	HCD (High Energy Collision Dissociation)	MS2	0	17.095	49.2077	35232	MS201900102_Con1.raw	F1		52	43	36	0.00151729	0	0.0002481	419548672	49.37
		FALSE	High	Mascot (A5)	Unambiguous	[R].STGEAFVQFASQEIAEK.[A]		2	2	P70333; O35737	P70333; O35737	0	2	1	0	1	1	921.458	1841.91	1841.89	9.58	0.00882	HCD (High Energy Collision Dissociation)	MS2	0	9.43	49.479	35512	MS201900102_Con1.raw	F1		55	43	36	0.000695216	0	0.0001595	419548672	49.37
	FALSE	High	[RK].ATENDIYNFFSPLNPVR.[V]			7.62508e-06	0	2	2	2	O35737; Q9Z2X1	O35737 [300-316]; Q9Z2X1 [300-316]	0	1996.98	0	100	Shared	High	High	0	4.914e-06	87	65.32	R.ATENDIYNFFSPLNPVR.V	[300-316]		Used
		Checked	Confidence	Identifying Node	PSM Ambiguity	Annotated Sequence	Modifications	# Protein Groups	# Proteins	Master Protein Accessions	Protein Accessions	# Missed Cleavages	Charge	DeltaScore	DeltaCn	Rank	Search Engine Rank	m/z [Da]	MH+ [Da]	Theo. MH+ [Da]	DeltaM [ppm]	Deltam/z [Da]	Activation Type	MS Order	Isolation Interference [%]	Ion Inject Time [ms]	RT [min]	First Scan	Spectrum File	File ID	Quan Info	Ions Score	Identity Strict	Identity Relaxed	Expectation Value	Percolator q-Value	Percolator PEP	Precursor Abundance	Apex RT [min]
		FALSE	High	Mascot (A5)	Unambiguous	[RK].ATENDIYNFFSPLNPVR.[V]		2	2	O35737; Q9Z2X1	O35737; Q9Z2X1	0	2	1	0	1	1	999.004	1997	1996.98	12.31	0.01229	HCD (High Energy Collision Dissociation)	MS2	50.4825	25	64.9124	47661	MS201900102_Con1.raw	F1		59	43	36	0.000255709	0	0.0003684	103723912	65.32
		FALSE	High	Mascot (A5)	Unambiguous	[RK].ATENDIYNFFSPLNPVR.[V]		2	2	O35737; Q9Z2X1	O35737; Q9Z2X1	0	2	0.931	0	1	1	999	1996.99	1996.98	8.09	0.00808	HCD (High Energy Collision Dissociation)	MS2	0	1.808	65.3434	48109	MS201900102_Con1.raw	F1		87	43	36	4.81347e-07	0	4.914e-06	103723912	65.32
	FALSE	High	[R].VTGEADVEFATHEDAVAAMSK.[D]	1xOxidation [M19]		2.67198e-08	0	1	1	10	O35737	O35737 [327-347]	0	2194	0	100		High	High	0	1.633e-08	63	29.02	R.VTGEADVEFATHEDAVAAMSK.D	[327-347]		Used
		Checked	Confidence	Identifying Node	PSM Ambiguity	Annotated Sequence	Modifications	# Protein Groups	# Proteins	Master Protein Accessions	Protein Accessions	# Missed Cleavages	Charge	DeltaScore	DeltaCn	Rank	Search Engine Rank	m/z [Da]	MH+ [Da]	Theo. MH+ [Da]	DeltaM [ppm]	Deltam/z [Da]	Activation Type	MS Order	Isolation Interference [%]	Ion Inject Time [ms]	RT [min]	First Scan	Spectrum File	File ID	Quan Info	Ions Score	Identity Strict	Identity Relaxed	Expectation Value	Percolator q-Value	Percolator PEP	Precursor Abundance	Apex RT [min]
		FALSE	High	Mascot (A5)	Unambiguous	[R].VTGEADVEFATHEDAVAAmSK.[D]	M19(Oxidation)	1	1	O35737	O35737	0	3	1	0	1	1	732.018	2194.04	2194	19.75	0.01445	HCD (High Energy Collision Dissociation)	MS2	77.4299	25	36.6825	20949	MS201900102_Con1.raw	F1	Not Reliable	20	45	38	3.57792	0	0.0002217
		FALSE	High	Mascot (A5)	Unambiguous	[R].VTGEADVEFATHEDAVAAmSK.[D]	M19(Oxidation)	1	1	O35737	O35737	0	3	1	0	1	1	732.011	2194.02	2194	10.24	0.00749	HCD (High Energy Collision Dissociation)	MS2	0	17.264	29.1254	14345	MS201900102_Con1.raw	F1		63	45	38	0.000177322	0	1.633e-08	6016739	29.02
		FALSE	High	Mascot (A5)	Unambiguous	[R].VTGEADVEFATHEDAVAAmSK.[D]	M19(Oxidation)	1	1	O35737	O35737	0	3	1	0	1	1	732.011	2194.02	2194	9.32	0.00682	HCD (High Energy Collision Dissociation)	MS2	30.0605	25	30.1743	15267	MS201900102_Con1.raw	F1		35	45	38	0.115096	0	0.0001121	1.70236e+06	30.19
		FALSE	High	Mascot (A5)	Unambiguous	[R].VTGEADVEFATHEDAVAAmSK.[D]	M19(Oxidation)	1	1	O35737	O35737	0	3	1	0	1	1	732.009	2194.01	2194	7.57	0.00554	HCD (High Energy Collision Dissociation)	MS2	0	17.562	29.5661	14718	MS201900102_Con1.raw	F1		61	45	38	0.00026751	0	7.271e-07	4.39474e+06	29.4
		FALSE	High	Mascot (A5)	Unambiguous	[R].VTGEADVEFATHEDAVAAmSK.[D]	M19(Oxidation)	1	1	O35737	O35737	0	3	1	0	1	1	732.008	2194.01	2194	6.07	0.00444	HCD (High Energy Collision Dissociation)	MS2	48.2863	20.538	28.702	14000	MS201900102_Con1.raw	F1		51	45	38	0.00274984	0	4.495e-07	6016739	29.02
		FALSE	High	Mascot (A5)	Unambiguous	[R].VTGEADVEFATHEDAVAAmSK.[D]	M19(Oxidation)	1	1	O35737	O35737	0	3	1	0	1	1	732.008	2194.01	2194	5.32	0.00389	HCD (High Energy Collision Dissociation)	MS2	64.6916	25	30.6239	15643	MS201900102_Con1.raw	F1		29	45	38	0.444383	0	0.0002908	1.68577e+06	30.82
		FALSE	High	Mascot (A5)	Unambiguous	[R].VTGEADVEFATHEDAVAAmSK.[D]	M19(Oxidation)	1	1	O35737	O35737	0	3	1	0	1	1	732.009	2194.01	2194	7.07	0.00517	HCD (High Energy Collision Dissociation)	MS2	0	20.318	29.241	14456	MS201900102_Con1.raw	F1		62	45	38	0.000232296	0	1.424e-08	6016739	29.02
		FALSE	High	Mascot (A5)	Unambiguous	[R].VTGEADVEFATHEDAVAAmSK.[D]	M19(Oxidation)	1	1	O35737	O35737	0	3	1	0	1	1	732.014	2194.03	2194	14.33	0.01048	HCD (High Energy Collision Dissociation)	MS2	14.4241	25	37.2465	21600	MS201900102_Con1.raw	F1		10	45	38	36.4215	0.0004707	0.005807	1.09262e+06	36.87
		FALSE	High	Mascot (A5)	Unambiguous	[R].VTGEADVEFATHEDAVAAmSK.[D]	M19(Oxidation)	1	1	O35737	O35737	0	3	0.5	0	1	1	732.012	2194.02	2194	11.33	0.00828	HCD (High Energy Collision Dissociation)	MS2	39.5531	25	37.7651	22220	MS201900102_Con1.raw	F1		8	45	38	57.81	0.0004707	0.002083
		FALSE	High	Mascot (A5)	Unambiguous	[R].VTGEADVEFATHEDAVAAmSK.[D]	M19(Oxidation)	1	1	O35737	O35737	0	3	1	0	1	1	732.012	2194.02	2194	10.91	0.00798	HCD (High Energy Collision Dissociation)	MS2	39.7486	25	31.3262	16240	MS201900102_Con1.raw	F1		15	45	38	10.8236	0.0004707	0.005061
	FALSE	High	[R].VTGEADVEFATHEDAVAAMSK.[D]			1.8201e-08	0	1	1	18	O35737	O35737 [327-347]	0	2178	0	100		High	High	0	9.575e-09	89	34.92	R.VTGEADVEFATHEDAVAAMSK.D	[327-347]		Used
		Checked	Confidence	Identifying Node	PSM Ambiguity	Annotated Sequence	Modifications	# Protein Groups	# Proteins	Master Protein Accessions	Protein Accessions	# Missed Cleavages	Charge	DeltaScore	DeltaCn	Rank	Search Engine Rank	m/z [Da]	MH+ [Da]	Theo. MH+ [Da]	DeltaM [ppm]	Deltam/z [Da]	Activation Type	MS Order	Isolation Interference [%]	Ion Inject Time [ms]	RT [min]	First Scan	Spectrum File	File ID	Quan Info	Ions Score	Identity Strict	Identity Relaxed	Expectation Value	Percolator q-Value	Percolator PEP	Precursor Abundance	Apex RT [min]
		FALSE	High	Mascot (A5)	Unambiguous	[R].VTGEADVEFATHEDAVAAMSK.[D]		1	1	O35737	O35737	0	3	0.1379	0	1	1	726.678	2178.02	2178	8.26	0.006	HCD (High Energy Collision Dissociation)	MS2	5.36666	22.506	36.6511	20913	MS201900102_Con1.raw	F1		58	45	38	0.000547431	0	2.763e-06
		FALSE	High	Mascot (A5)	Unambiguous	[R].VTGEADVEFATHEDAVAAMSK.[D]		1	1	O35737	O35737	0	3	0.1194	0	1	1	726.678	2178.02	2178	8.26	0.006	HCD (High Energy Collision Dissociation)	MS2	5.40855	8.843	34.9224	19171	MS201900102_Con1.raw	F1		67	45	38	6.37279e-05	0	2.015e-06	11060356	34.92
		FALSE	High	Mascot (A5)	Unambiguous	[R].VTGEADVEFATHEDAVAAMSK.[D]		1	1	O35737	O35737	0	3	0.1429	0	1	1	726.678	2178.02	2178	8.09	0.00588	HCD (High Energy Collision Dissociation)	MS2	0	25	34.5019	18839	MS201900102_Con1.raw	F1		49	45	38	0.00398696	0	8.561e-07	11060356	34.92
		FALSE	High	Mascot (A5)	Unambiguous	[R].VTGEADVEFATHEDAVAAMSK.[D]		1	1	O35737	O35737	0	3	0.1538	0	1	1	726.677	2178.02	2178	7.34	0.00533	HCD (High Energy Collision Dissociation)	MS2	38.6052	25	40.2965	25192	MS201900102_Con1.raw	F1		52	45	38	0.00228988	0	1.761e-06	3644669	38.62
		FALSE	High	Mascot (A5)	Unambiguous	[R].VTGEADVEFATHEDAVAAMSK.[D]		1	1	O35737	O35737	0	3	0.1628	0	1	1	726.677	2178.02	2178	6.66	0.00484	HCD (High Energy Collision Dissociation)	MS2	20.9239	13.334	38.9378	23565	MS201900102_Con1.raw	F1		43	45	38	0.0177696	0	5.02e-06	3644669	38.62
		FALSE	High	Mascot (A5)	Unambiguous	[R].VTGEADVEFATHEDAVAAMSK.[D]		1	1	O35737	O35737	0	3	0.2	0	1	1	726.676	2178.01	2178	5.82	0.00423	HCD (High Energy Collision Dissociation)	MS2	4.70503	21.606	38.0234	22533	MS201900102_Con1.raw	F1		50	45	38	0.00338882	0	7.508e-08
		FALSE	High	Mascot (A5)	Unambiguous	[R].VTGEADVEFATHEDAVAAMSK.[D]		1	1	O35737	O35737	0	3	0.1639	0	1	1	726.676	2178.01	2178	5.57	0.00404	HCD (High Energy Collision Dissociation)	MS2	20.9174	25	35.7789	19961	MS201900102_Con1.raw	F1		61	45	38	0.000287609	0	3.189e-06
		FALSE	High	Mascot (A5)	Unambiguous	[R].VTGEADVEFATHEDAVAAMSK.[D]		1	1	O35737	O35737	0	2	0.2083	0	1	1	1089.51	2178.01	2178	4.18	0.00455	HCD (High Energy Collision Dissociation)	MS2	0	25	35.884	20067	MS201900102_Con1.raw	F1		48	45	38	0.00604876	0	0.0001353
		FALSE	High	Mascot (A5)	Unambiguous	[R].VTGEADVEFATHEDAVAAMSK.[D]		1	1	O35737	O35737	0	2	0.1685	0	1	1	1089.51	2178.01	2178	3.62	0.00394	HCD (High Energy Collision Dissociation)	MS2	0	25	34.9891	19225	MS201900102_Con1.raw	F1		89	45	38	4.4778e-07	0	9.575e-09	3.66182e+06	34.8
		FALSE	High	Mascot (A5)	Unambiguous	[R].VTGEADVEFATHEDAVAAMSK.[D]		1	1	O35737	O35737	0	3	0.1351	0	1	1	726.678	2178.02	2178	8.26	0.006	HCD (High Energy Collision Dissociation)	MS2	11.1909	15.673	34.6243	18944	MS201900102_Con1.raw	F1		74	45	38	1.50428e-05	0	1.866e-06	11060356	34.92
		FALSE	High	Mascot (A5)	Unambiguous	[R].VTGEADVEFATHEDAVAAMSK.[D]		1	1	O35737	O35737	0	3	0.1429	0	1	1	726.678	2178.02	2178	8.51	0.00618	HCD (High Energy Collision Dissociation)	MS2	6.64852	25	37.553	21965	MS201900102_Con1.raw	F1		63	45	38	0.000180749	0	1.344e-08
		FALSE	High	Mascot (A5)	Unambiguous	[R].VTGEADVEFATHEDAVAAMSK.[D]		1	1	O35737	O35737	0	3	0.125	0	1	1	726.679	2178.02	2178	8.77	0.00636	HCD (High Energy Collision Dissociation)	MS2	46.8198	10.558	35.3454	19541	MS201900102_Con1.raw	F1		64	45	38	0.000137647	0	3.008e-07	11060356	34.92
		FALSE	High	Mascot (A5)	Unambiguous	[R].VTGEADVEFATHEDAVAAMSK.[D]		1	1	O35737	O35737	0	3	0.1385	0	1	1	726.678	2178.02	2178	8.6	0.00624	HCD (High Energy Collision Dissociation)	MS2	0	19.005	36.2199	20425	MS201900102_Con1.raw	F1		65	45	38	0.000122255	0	5.437e-07
		FALSE	High	Mascot (A5)	Unambiguous	[R].VTGEADVEFATHEDAVAAMSK.[D]		1	1	O35737	O35737	0	3	0.1509	0	1	1	726.68	2178.03	2178	11.2	0.00813	HCD (High Energy Collision Dissociation)	MS2	0	19.892	34.5321	18865	MS201900102_Con1.raw	F1		53	45	38	0.00153464	0	4.811e-06	11060356	34.92
		FALSE	High	Mascot (A5)	Unambiguous	[R].VTGEADVEFATHEDAVAAMSK.[D]		1	1	O35737	O35737	0	3	0.1406	0	1	1	726.68	2178.02	2178	10.45	0.00758	HCD (High Energy Collision Dissociation)	MS2	2.00543	25	37.1023	21433	MS201900102_Con1.raw	F1		64	45	38	0.000133112	0	1.545e-06
		FALSE	High	Mascot (A5)	Unambiguous	[R].VTGEADVEFATHEDAVAAMSK.[D]		1	1	O35737	O35737	0	3	0.1471	0	1	1	726.679	2178.02	2178	9.27	0.00673	HCD (High Energy Collision Dissociation)	MS2	0	8.537	35.4248	19617	MS201900102_Con1.raw	F1		68	45	38	5.75092e-05	0	8.986e-08	11060356	34.92
		FALSE	High	Mascot (A5)	Unambiguous	[R].VTGEADVEFATHEDAVAAMSK.[D]		1	1	O35737	O35737	0	3	0.1636	0	1	1	726.679	2178.02	2178	9.19	0.00667	HCD (High Energy Collision Dissociation)	MS2	16.2589	25	39.4443	24174	MS201900102_Con1.raw	F1		55	45	38	0.00114734	0	5.011e-06	3644669	38.62
		FALSE	High	Mascot (A5)	Unambiguous	[R].VTGEADVEFATHEDAVAAMSK.[D]		1	1	O35737	O35737	0	3	0.1633	0	1	1	726.679	2178.02	2178	8.77	0.00636	HCD (High Energy Collision Dissociation)	MS2	19.9332	18.819	38.4547	23040	MS201900102_Con1.raw	F1		49	45	38	0.00475079	0	2.759e-05	3644669	38.62
	FALSE	High	[R].VHIEIGPDGR.[V]			0.00131291	0	3	3	4	P70333; O35737; Q9Z2X1	P70333 [317-326]; O35737 [317-326]; Q9Z2X1 [317-326]	0	1092.58	0	100	Shared	High	High	0	0.001011	54	18.19	R.VHIEIGPDGR.V	[317-326]		Not Used
		Checked	Confidence	Identifying Node	PSM Ambiguity	Annotated Sequence	Modifications	# Protein Groups	# Proteins	Master Protein Accessions	Protein Accessions	# Missed Cleavages	Charge	DeltaScore	DeltaCn	Rank	Search Engine Rank	m/z [Da]	MH+ [Da]	Theo. MH+ [Da]	DeltaM [ppm]	Deltam/z [Da]	Activation Type	MS Order	Isolation Interference [%]	Ion Inject Time [ms]	RT [min]	First Scan	Spectrum File	File ID	Quan Info	Ions Score	Identity Strict	Identity Relaxed	Expectation Value	Percolator q-Value	Percolator PEP	Precursor Abundance	Apex RT [min]
		FALSE	High	Mascot (A5)	Unambiguous	[R].VHIEIGPDGR.[V]		3	3	P70333; O35737; Q9Z2X1	P70333; O35737; Q9Z2X1	0	2	1	0	1	1	546.797	1092.59	1092.58	7.15	0.00391	HCD (High Energy Collision Dissociation)	MS2	24.9412	21.738	18.8046	8136	MS201900102_Con1.raw	F1		54	39	32	0.000317811	0	0.001011	25315370	19.01
		FALSE	High	Mascot (A5)	Unambiguous	[R].VHIEIGPDGR.[V]		3	3	P70333; O35737; Q9Z2X1	P70333; O35737; Q9Z2X1	0	2	1	0	1	1	546.798	1092.59	1092.58	8.72	0.00476	HCD (High Energy Collision Dissociation)	MS2	32.8547	11.508	19.2393	8634	MS201900102_Con1.raw	F1		54	39	32	0.000338212	0.0004707	0.005302	25315370	19.01
		FALSE	High	Mascot (A5)	Unambiguous	[R].VHIEIGPDGR.[V]		3	3	P70333; O35737; Q9Z2X1	P70333; O35737; Q9Z2X1	0	2	1	0	1	1	546.798	1092.59	1092.58	8.61	0.0047	HCD (High Energy Collision Dissociation)	MS2	35.6228	4.047	18.3666	7628	MS201900102_Con1.raw	F1		37	39	32	0.0173448	0.001254	0.04473	175867744	18.19
		FALSE	High	Mascot (A5)	Unambiguous	[R].VHIEIGPDGR.[V]		3	3	P70333; O35737; Q9Z2X1	P70333; O35737; Q9Z2X1	0	2	0.6111	0	1	1	546.798	1092.59	1092.58	7.82	0.00427	HCD (High Energy Collision Dissociation)	MS2	86.143	8.048	17.9358	7134	MS201900102_Con1.raw	F1		18	39	32	1.4695	0.004207	0.1521	175867744	18.19
	FALSE	High	[R].YVELFLNSTAGASGGAYEHR.[Y]			4.91306e-09	0	1	1	19	O35737	O35737 [356-375]	0	2142.03	0	100		High	High	0	7.745e-09	113	36.82	R.YVELFLNSTAGASGGAYEHR.Y	[356-375]		Used
		Checked	Confidence	Identifying Node	PSM Ambiguity	Annotated Sequence	Modifications	# Protein Groups	# Proteins	Master Protein Accessions	Protein Accessions	# Missed Cleavages	Charge	DeltaScore	DeltaCn	Rank	Search Engine Rank	m/z [Da]	MH+ [Da]	Theo. MH+ [Da]	DeltaM [ppm]	Deltam/z [Da]	Activation Type	MS Order	Isolation Interference [%]	Ion Inject Time [ms]	RT [min]	First Scan	Spectrum File	File ID	Quan Info	Ions Score	Identity Strict	Identity Relaxed	Expectation Value	Percolator q-Value	Percolator PEP	Precursor Abundance	Apex RT [min]
		FALSE	High	Mascot (A5)	Unambiguous	[R].YVELFLNSTAGASGGAYEHR.[Y]		1	1	O35737	O35737	0	3	1	0	1	1	714.684	2142.04	2142.03	6.24	0.00446	HCD (High Energy Collision Dissociation)	MS2	67.015	25	36.6174	20876	MS201900102_Con1.raw	F1		82	44	37	1.71357e-06	0	1.853e-07	19965398	36.82
		FALSE	High	Mascot (A5)	Unambiguous	[R].YVELFLNSTAGASGGAYEHR.[Y]		1	1	O35737	O35737	0	3	1	0	1	1	714.688	2142.05	2142.03	11.97	0.00855	HCD (High Energy Collision Dissociation)	MS2	61.9858	25	41.8264	26957	MS201900102_Con1.raw	F1		58	44	37	0.00039304	0	0.001501
		FALSE	High	Mascot (A5)	Unambiguous	[R].YVELFLNSTAGASGGAYEHR.[Y]		1	1	O35737	O35737	0	3	1	0	1	1	714.687	2142.05	2142.03	9.4	0.00671	HCD (High Energy Collision Dissociation)	MS2	35.083	22.148	37.7007	22142	MS201900102_Con1.raw	F1		59	44	37	0.000318769	0	1.7e-07	19965398	36.82
		FALSE	High	Mascot (A5)	Unambiguous	[R].YVELFLNSTAGASGGAYEHR.[Y]		1	1	O35737	O35737	0	3	1	0	1	1	714.687	2142.05	2142.03	9.4	0.00671	HCD (High Energy Collision Dissociation)	MS2	14.5923	8.997	37.0771	21402	MS201900102_Con1.raw	F1		76	44	37	7.89726e-06	0	1.406e-06	19965398	36.82
		FALSE	High	Mascot (A5)	Unambiguous	[R].YVELFLNSTAGASGGAYEHR.[Y]		1	1	O35737	O35737	0	3	1	0	1	1	714.687	2142.05	2142.03	9.4	0.00671	HCD (High Energy Collision Dissociation)	MS2	22.1383	9.055	37.0804	21404	MS201900102_Con1.raw	F1		80	44	37	2.84103e-06	0	1.124e-07	19965398	36.82
		FALSE	High	Mascot (A5)	Unambiguous	[R].YVELFLNSTAGASGGAYEHR.[Y]		1	1	O35737	O35737	0	3	1	0	1	1	714.686	2142.04	2142.03	8.46	0.00604	HCD (High Energy Collision Dissociation)	MS2	7.83683	25	40.3709	25281	MS201900102_Con1.raw	F1		72	44	37	1.80448e-05	0	9.848e-09	2058390	39.81
		FALSE	High	Mascot (A5)	Unambiguous	[R].YVELFLNSTAGASGGAYEHR.[Y]		1	1	O35737	O35737	0	3	0.7857	0	1	1	714.686	2142.04	2142.03	8.29	0.00592	HCD (High Energy Collision Dissociation)	MS2	81.2408	5.879	38.5626	23149	MS201900102_Con1.raw	F1		14	44	37	12.1823	0	0.001469	4.43813e+06	38.66
		FALSE	High	Mascot (A5)	Unambiguous	[R].YVELFLNSTAGASGGAYEHR.[Y]		1	1	O35737	O35737	0	3	1	0	1	1	714.686	2142.04	2142.03	8.04	0.00574	HCD (High Energy Collision Dissociation)	MS2	4.58973	12.452	37.5091	21915	MS201900102_Con1.raw	F1		72	44	37	1.72266e-05	0	3.915e-09	19965398	36.82
		FALSE	High	Mascot (A5)	Unambiguous	[R].YVELFLNSTAGASGGAYEHR.[Y]		1	1	O35737	O35737	0	2	1	0	1	1	1071.52	2142.04	2142.03	7.81	0.00837	HCD (High Energy Collision Dissociation)	MS2		25	38.0023	22508	MS201900102_Con1.raw	F1		69	44	37	3.86497e-05	0	2.151e-05	7.13382e+06	36.87
		FALSE	High	Mascot (A5)	Unambiguous	[R].YVELFLNSTAGASGGAYEHR.[Y]		1	1	O35737	O35737	0	3	1	0	1	1	714.685	2142.04	2142.03	7.78	0.00555	HCD (High Energy Collision Dissociation)	MS2	57.7906	25	41.1363	26181	MS201900102_Con1.raw	F1		55	44	37	0.00091959	0	1.165e-05
		FALSE	High	Mascot (A5)	Unambiguous	[R].YVELFLNSTAGASGGAYEHR.[Y]		1	1	O35737	O35737	0	2	1	0	1	1	1071.52	2142.04	2142.03	7.47	0.008	HCD (High Energy Collision Dissociation)	MS2	10.1758	25	39.4413	24170	MS201900102_Con1.raw	F1		69	44	37	3.50973e-05	0	5.697e-06
		FALSE	High	Mascot (A5)	Unambiguous	[R].YVELFLNSTAGASGGAYEHR.[Y]		1	1	O35737	O35737	0	3	0.9355	0	1	1	714.685	2142.04	2142.03	7.27	0.00519	HCD (High Energy Collision Dissociation)	MS2	69.3455	6.483	38.5044	23093	MS201900102_Con1.raw	F1		31	44	37	0.227928	0	4.868e-06	4.43813e+06	38.66
		FALSE	High	Mascot (A5)	Unambiguous	[R].YVELFLNSTAGASGGAYEHR.[Y]		1	1	O35737	O35737	0	3	1	0	1	1	714.684	2142.04	2142.03	5.9	0.00421	HCD (High Energy Collision Dissociation)	MS2	29.68	25	39.7631	24547	MS201900102_Con1.raw	F1		66	44	37	8.18323e-05	0	2.485e-09	2058390	39.81
		FALSE	High	Mascot (A5)	Unambiguous	[R].YVELFLNSTAGASGGAYEHR.[Y]		1	1	O35737	O35737	0	3	1	0	1	1	714.684	2142.04	2142.03	5.21	0.00372	HCD (High Energy Collision Dissociation)	MS2	8.37612	23.397	38.9512	23583	MS201900102_Con1.raw	F1		113	44	37	1.33989e-09	0	7.745e-09	4.43813e+06	38.66
		FALSE	High	Mascot (A5)	Unambiguous	[R].YVELFLNSTAGASGGAYEHR.[Y]		1	1	O35737	O35737	0	3	1	0	1	1	714.684	2142.04	2142.03	5.13	0.00366	HCD (High Energy Collision Dissociation)	MS2	0	15.064	39.4982	24239	MS201900102_Con1.raw	F1		96	44	37	6.89573e-08	0	3.524e-07	2058390	39.81
		FALSE	High	Mascot (A5)	Unambiguous	[R].YVELFLNSTAGASGGAYEHR.[Y]		1	1	O35737	O35737	0	3	1	0	1	1	714.681	2142.03	2142.03	1.71	0.00122	HCD (High Energy Collision Dissociation)	MS2	55.4562	16.979	39.8922	24701	MS201900102_Con1.raw	F1		26	44	37	0.840872	0	8.011e-05	2058390	39.81
		FALSE	High	Mascot (A5)	Unambiguous	[R].YVELFLNSTAGASGGAYEHR.[Y]		1	1	O35737	O35737	0	2	1	0	1	1	1071.52	2142.03	2142.03	0.06	7e-05	HCD (High Energy Collision Dissociation)	MS2	0	25	40.3747	25286	MS201900102_Con1.raw	F1		67	44	37	6.24483e-05	0	3.712e-05
		FALSE	High	Mascot (A5)	Unambiguous	[R].YVELFLNSTAGASGGAYEHR.[Y]		1	1	O35737	O35737	0	3	1	0	1	1	714.687	2142.05	2142.03	10	0.00714	HCD (High Energy Collision Dissociation)	MS2	51.1862	25	41.6479	26741	MS201900102_Con1.raw	F1		49	44	37	0.00371936	0.0004707	0.002411
		FALSE	High	Mascot (A5)	Unambiguous	[R].YVELFLNSTAGASGGAYEHR.[Y]		1	1	O35737	O35737	0	3	1	0	1	1	714.683	2142.03	2142.03	4.1	0.00293	HCD (High Energy Collision Dissociation)	MS2	74.586	25	42.6332	27916	MS201900102_Con1.raw	F1		19	44	37	3.73489	0.000939	0.0377	672545	42.64
	FALSE	High	[R].EGRPSGEAFVELESEDEVK.[L]			0.000110878	0	2	2	16	P70333; O35737	P70333 [50-68]; O35737 [50-68]	0	2106.98	0	100	Shared	High	High	0	7.828e-05	56	33.01	R.EGRPSGEAFVELESEDEVK.L	[50-68]		Not Used
		Checked	Confidence	Identifying Node	PSM Ambiguity	Annotated Sequence	Modifications	# Protein Groups	# Proteins	Master Protein Accessions	Protein Accessions	# Missed Cleavages	Charge	DeltaScore	DeltaCn	Rank	Search Engine Rank	m/z [Da]	MH+ [Da]	Theo. MH+ [Da]	DeltaM [ppm]	Deltam/z [Da]	Activation Type	MS Order	Isolation Interference [%]	Ion Inject Time [ms]	RT [min]	First Scan	Spectrum File	File ID	Quan Info	Ions Score	Identity Strict	Identity Relaxed	Expectation Value	Percolator q-Value	Percolator PEP	Precursor Abundance	Apex RT [min]
		FALSE	High	Mascot (A5)	Unambiguous	[R].EGRPSGEAFVELESEDEVK.[L]		2	2	P70333; O35737	P70333; O35737	0	3	1	0	1	1	703.005	2107	2106.98	8.83	0.0062	HCD (High Energy Collision Dissociation)	MS2	83.4794	7.593	34.0841	18499	MS201900102_Con1.raw	F1		16	44	37	7.67545	0	0.001034	34591808	33.01
		FALSE	High	Mascot (A5)	Unambiguous	[R].EGRPSGEAFVELESEDEVK.[L]		2	2	P70333; O35737	P70333; O35737	0	3	1	0	1	1	703.005	2107	2106.98	8.49	0.00596	HCD (High Energy Collision Dissociation)	MS2	79.5829	13.839	36.8206	21102	MS201900102_Con1.raw	F1		15	44	37	9.15275	0	0.0005965	1.47032e+06	36.71
		FALSE	High	Mascot (A5)	Unambiguous	[R].EGRPSGEAFVELESEDEVK.[L]		2	2	P70333; O35737	P70333; O35737	0	3	1	0	1	1	703.005	2107	2106.98	7.88	0.00553	HCD (High Energy Collision Dissociation)	MS2	60.8541	21.003	37.3036	21669	MS201900102_Con1.raw	F1		23	45	38	1.56736	0	9.966e-05	1.47032e+06	36.71
		FALSE	High	Mascot (A5)	Unambiguous	[R].EGRPSGEAFVELESEDEVK.[L]		2	2	P70333; O35737	P70333; O35737	0	3	1	0	1	1	703.004	2107	2106.98	7.7	0.00541	HCD (High Energy Collision Dissociation)	MS2	7.43558	2.691	33.2209	17799	MS201900102_Con1.raw	F1		56	45	38	0.000798555	0	7.828e-05	34591808	33.01
		FALSE	High	Mascot (A5)	Unambiguous	[R].EGRPSGEAFVELESEDEVK.[L]		2	2	P70333; O35737	P70333; O35737	0	3	1	0	1	1	703.004	2107	2106.98	7.01	0.00492	HCD (High Energy Collision Dissociation)	MS2	56.745	8.229	33.6429	18131	MS201900102_Con1.raw	F1		23	45	38	1.69671	0	0.0001006	34591808	33.01
		FALSE	High	Mascot (A5)	Unambiguous	[R].EGRPSGEAFVELESEDEVK.[L]		2	2	P70333; O35737	P70333; O35737	0	3	1	0	1	1	703.004	2107	2106.98	6.57	0.00462	HCD (High Energy Collision Dissociation)	MS2	70.574	8.002	32.7986	17481	MS201900102_Con1.raw	F1		22	45	38	1.8387	0	0.0001155	34591808	33.01
		FALSE	High	Mascot (A5)	Unambiguous	[R].EGRPSGEAFVELESEDEVK.[L]		2	2	P70333; O35737	P70333; O35737	0	3	1	0	1	1	703.004	2107	2106.98	6.57	0.00462	HCD (High Energy Collision Dissociation)	MS2	86.4013	11.379	35.9318	20119	MS201900102_Con1.raw	F1		9	45	38	36.1835	0	0.0006333
		FALSE	High	Mascot (A5)	Unambiguous	[R].EGRPSGEAFVELESEDEVK.[L]		2	2	P70333; O35737	P70333; O35737	0	3	1	0	1	1	703.006	2107	2106.98	10.48	0.00736	HCD (High Energy Collision Dissociation)	MS2	68.6569	14.786	36.3869	20613	MS201900102_Con1.raw	F1		21	44	37	2.46803	0	0.0001078	1.47032e+06	36.71
		FALSE	High	Mascot (A5)	Unambiguous	[R].EGRPSGEAFVELESEDEVK.[L]		2	2	P70333; O35737	P70333; O35737	0	3	1	0	1	1	703.005	2107	2106.98	8.14	0.00572	HCD (High Energy Collision Dissociation)	MS2	82.1681	12.089	34.5603	18886	MS201900102_Con1.raw	F1		8	45	38	55.9834	0.0004707	0.01539
		FALSE	High	Mascot (A5)	Unambiguous	[R].EGRPSGEAFVELESEDEVK.[L]		2	2	P70333; O35737	P70333; O35737	0	3	1	0	1	1	703.004	2107	2106.98	6.92	0.00486	HCD (High Energy Collision Dissociation)	MS2	52.7608	25	38.5759	23162	MS201900102_Con1.raw	F1		12	45	38	20.3308	0.0004707	0.003218
		FALSE	High	Mascot (A5)	Unambiguous	[R].EGRPSGEAFVELESEDEVK.[L]		2	2	P70333; O35737	P70333; O35737	0	3	1	0	1	1	703.003	2106.99	2106.98	5.88	0.00413	HCD (High Energy Collision Dissociation)	MS2	85.2621	11.694	37.792	22252	MS201900102_Con1.raw	F1		14	45	38	13.6412	0.0004707	0.004336	1.47032e+06	36.71
		FALSE	High	Mascot (A5)	Unambiguous	[R].EGRPSGEAFVELESEDEVK.[L]		2	2	P70333; O35737	P70333; O35737	0	3	1	0	1	1	703.006	2107	2106.98	9.79	0.00687	HCD (High Energy Collision Dissociation)	MS2	82.0219	25	39.1068	23767	MS201900102_Con1.raw	F1		18	44	37	5.03107	0.0004707	0.002985
		FALSE	High	Mascot (A5)	Unambiguous	[R].EGRPSGEAFVELESEDEVK.[L]		2	2	P70333; O35737	P70333; O35737	0	3	1	0	1	1	703.006	2107	2106.98	9.88	0.00694	HCD (High Energy Collision Dissociation)	MS2	88.2823	7.465	31.6306	16494	MS201900102_Con1.raw	F1		6	44	37	82.7126	0.0004707	0.03545
		FALSE	High	Mascot (A5)	Unambiguous	[R].EGRPSGEAFVELESEDEVK.[L]		2	2	P70333; O35737	P70333; O35737	0	3	1	0	1	1	703.003	2106.99	2106.98	5.44	0.00382	HCD (High Energy Collision Dissociation)	MS2	88.9054	7.432	35.4847	19677	MS201900102_Con1.raw	F1		4	45	38	133.383	0.001254	0.04162
		FALSE	High	Mascot (A5)	Unambiguous	[R].EGRPSGEAFVELESEDEVK.[L]		2	2	P70333; O35737	P70333; O35737	0	3	1	0	1	1	703.003	2107	2106.98	6.05	0.00425	HCD (High Energy Collision Dissociation)	MS2	86.6063	7.192	35.0549	19279	MS201900102_Con1.raw	F1		5	45	38	105.449	0.003883	0.1206
		FALSE	High	Mascot (A5)	Unambiguous	[R].EGRPSGEAFVELESEDEVK.[L]		2	2	P70333; O35737	P70333; O35737	0	3	1	0	1	1	703.005	2107	2106.98	8.22	0.00578	HCD (High Energy Collision Dissociation)	MS2	86.9286	18.868	39.6314	24390	MS201900102_Con1.raw	F1		5	45	38	89.6193	0.007466	0.1898
	FALSE	High	[R].STGEAFVQFASQEIAEK.[A]	1xAcetyl [N-Term]	P70333 1xAcetyl [N-Term]; O35737 1xAcetyl [N-Term]	0.00279845	0.000581891	2	2	1	P70333; O35737	P70333 [151-167]; O35737 [151-167]	0	1883.9	0		No Quan Values	High	High	0.0004707	0.002211	31		R.STGEAFVQFASQEIAEK.A	[151-167]	1xAcetyl [N-Term]	Not Used
		Checked	Confidence	Identifying Node	PSM Ambiguity	Annotated Sequence	Modifications	# Protein Groups	# Proteins	Master Protein Accessions	Protein Accessions	# Missed Cleavages	Charge	DeltaScore	DeltaCn	Rank	Search Engine Rank	m/z [Da]	MH+ [Da]	Theo. MH+ [Da]	DeltaM [ppm]	Deltam/z [Da]	Activation Type	MS Order	Isolation Interference [%]	Ion Inject Time [ms]	RT [min]	First Scan	Spectrum File	File ID	Quan Info	Ions Score	Identity Strict	Identity Relaxed	Expectation Value	Percolator q-Value	Percolator PEP	Precursor Abundance	Apex RT [min]
		FALSE	High	Mascot (A5)	Unambiguous	[R].sTGEAFVQFASQEIAEK.[A]	N-Term(Acetyl)	2	2	P70333; O35737	P70333; O35737	0	2	1	0	1	1	942.463	1883.92	1883.9	9.07	0.00854	HCD (High Energy Collision Dissociation)	MS2	50.8756	25	57.4389	40068	MS201900102_Con1.raw	F1		31	43	36	0.212927	0.0004707	0.002211	305301	57.61
	FALSE	High	[K].SNNVEMDWVLK.[H]	1xOxidation [M6]		0.0100315	0.000581891	1	1	2	O35737	O35737 [88-98]	0	1350.64	0	100		High	High	0.0004707	0.008252	43	32.46	K.SNNVEMDWVLK.H	[88-98]		Used
		Checked	Confidence	Identifying Node	PSM Ambiguity	Annotated Sequence	Modifications	# Protein Groups	# Proteins	Master Protein Accessions	Protein Accessions	# Missed Cleavages	Charge	DeltaScore	DeltaCn	Rank	Search Engine Rank	m/z [Da]	MH+ [Da]	Theo. MH+ [Da]	DeltaM [ppm]	Deltam/z [Da]	Activation Type	MS Order	Isolation Interference [%]	Ion Inject Time [ms]	RT [min]	First Scan	Spectrum File	File ID	Quan Info	Ions Score	Identity Strict	Identity Relaxed	Expectation Value	Percolator q-Value	Percolator PEP	Precursor Abundance	Apex RT [min]
		FALSE	High	Mascot (A5)	Unambiguous	[K].SNNVEmDWVLK.[H]	M6(Oxidation)	1	1	O35737	O35737	0	2	1	0	1	1	675.827	1350.65	1350.64	7.47	0.00505	HCD (High Energy Collision Dissociation)	MS2	0	16.088	32.663	17384	MS201900102_Con1.raw	F1		43	42	35	0.00767552	0.0004707	0.008252	28643280	32.46
		FALSE	High	Mascot (A5)	Unambiguous	[K].SNNVEmDWVLK.[H]	M6(Oxidation)	1	1	O35737	O35737	0	2	1	0	1	1	675.826	1350.64	1350.64	6.66	0.0045	HCD (High Energy Collision Dissociation)	MS2	13.4335	18.447	32.241	17025	MS201900102_Con1.raw	F1		31	42	35	0.135128	0.0004707	0.03477	28643280	32.46
	FALSE	High	[K].HTGPNSPDTANDGFVR.[L]	1xPhospho [S6]	P70333 1xPhospho [S104]; O35737 1xPhospho [S104]	0.0312614	0.000581891	2	2	1	P70333; O35737	P70333 [99-114]; O35737 [99-114]	0	1764.73	0	100	Shared	High	High	0.0004707	0.02677	86	18.7	K.HTGPNSPDTANDGFVR.L	[99-114]	1xPhospho [S104]	Not Used
		Checked	Confidence	Identifying Node	PSM Ambiguity	Annotated Sequence	Modifications	# Protein Groups	# Proteins	Master Protein Accessions	Protein Accessions	# Missed Cleavages	Charge	DeltaScore	DeltaCn	Rank	Search Engine Rank	m/z [Da]	MH+ [Da]	Theo. MH+ [Da]	DeltaM [ppm]	Deltam/z [Da]	Activation Type	MS Order	Isolation Interference [%]	Ion Inject Time [ms]	RT [min]	First Scan	Spectrum File	File ID	Quan Info	Ions Score	Identity Strict	Identity Relaxed	Expectation Value	Percolator q-Value	Percolator PEP	Precursor Abundance	Apex RT [min]
		FALSE	High	Mascot (A5)	Unambiguous	[K].HTGPNsPDTANDGFVR.[L]	S6(Phospho)	2	2	P70333; O35737	P70333; O35737	0	2	0.3023	0	1	1	882.876	1764.74	1764.73	5.8	0.00511	HCD (High Energy Collision Dissociation)	MS2	0	25	18.5535	7841	MS201900102_Con1.raw	F1		86	43	36	5.37365e-07	0.0004707	0.02677	4294910	18.7
	FALSE	High	[R].DLNYCFSGMSDHR.[Y]	1xPhospho [Y4]	P70333 1xPhospho [Y266]; O35737 1xPhospho [Y266]	0.0310989	0.000581891	2	2	1	P70333; O35737	P70333 [263-275]; O35737 [263-275]	0	1624.59	0	100	Shared	High	High	0.0004707	0.02662	21	39.2	R.DLNYCFSGMSDHR.Y	[263-275]	1xPhospho [Y266]	Not Used
		Checked	Confidence	Identifying Node	PSM Ambiguity	Annotated Sequence	Modifications	# Protein Groups	# Proteins	Master Protein Accessions	Protein Accessions	# Missed Cleavages	Charge	DeltaScore	DeltaCn	Rank	Search Engine Rank	m/z [Da]	MH+ [Da]	Theo. MH+ [Da]	DeltaM [ppm]	Deltam/z [Da]	Activation Type	MS Order	Isolation Interference [%]	Ion Inject Time [ms]	RT [min]	First Scan	Spectrum File	File ID	Quan Info	Ions Score	Identity Strict	Identity Relaxed	Expectation Value	Percolator q-Value	Percolator PEP	Precursor Abundance	Apex RT [min]
		FALSE	High	Mascot (A5)	Unambiguous	[R].DLNyCFSGMSDHR.[Y]	Y4(Phospho)	2	2	P70333; O35737	P70333; O35737	0	2	1	0	1	1	812.803	1624.6	1624.59	3.81	0.00309	HCD (High Energy Collision Dissociation)	MS2	68.6109	25	39.1114	23773	MS201900102_Con1.raw	F1		21	40	33	0.746146	0.0004707	0.02662	868716	39.2
FALSE	High	Master Protein	P99024	Tubulin beta-5 chain OS=Mus musculus OX=10090 GN=Tubb5 PE=1 SV=1	0	83.908	44	16	44	3	1	444	49.6	4.89	1106	16	cell organization and biogenesis	cytoplasm;cytoskeleton;cytosol;membrane;nucleus	catalytic activity;nucleotide binding;protein binding;structural molecule activity	Pf00091, Pf03953, Pf10644	22154	ENSMUSG00000001525.10	Tubb5	17		Phagosome; Gap junction	18	100	High
	Checked	Confidence	Annotated Sequence	Modifications	Modifications in Master Proteins	Qvality PEP	Qvality q-value	# Protein Groups	# Proteins	# PSMs	Master Protein Accessions	Positions in Master Proteins	# Missed Cleavages	Theo. MH+ [Da]	# Razor Quan Results	Abundances (Scaled): F1: Sample	Quan Info	Found in Sample: [S1] F1: Sample	Confidence (by Search Engine): Mascot	Percolator q-Value (by Search Engine): Mascot	Percolator PEP (by Search Engine): Mascot	Ions Score (by Search Engine): Mascot	Top Apex RT [min]	Sequence in Protein	Positions in Protein	Peptide Group Modifications in Protein	Quan Usage
	FALSE	High	[R].SGPFGQIFRPDNFVFGQSGAGNNWAK.[G]			5.3834e-07	0	3	5	1	Q7TMM9; Q9D6F9; P99024	Q7TMM9 [78-103]; Q9D6F9 [78-103]; P99024 [78-103]	0	2798.34	0	100	Shared	High	High	0	3.176e-07	65	59.15	R.SGPFGQIFRPDNFVFGQSGAGNNWAK.G	[78-103]		Used
		Checked	Confidence	Identifying Node	PSM Ambiguity	Annotated Sequence	Modifications	# Protein Groups	# Proteins	Master Protein Accessions	Protein Accessions	# Missed Cleavages	Charge	DeltaScore	DeltaCn	Rank	Search Engine Rank	m/z [Da]	MH+ [Da]	Theo. MH+ [Da]	DeltaM [ppm]	Deltam/z [Da]	Activation Type	MS Order	Isolation Interference [%]	Ion Inject Time [ms]	RT [min]	First Scan	Spectrum File	File ID	Quan Info	Ions Score	Identity Strict	Identity Relaxed	Expectation Value	Percolator q-Value	Percolator PEP	Precursor Abundance	Apex RT [min]
		FALSE	High	Mascot (A5)	Unambiguous	[R].SGPFGQIFRPDNFVFGQSGAGNNWAK.[G]		3	5	Q7TMM9; Q9D6F9; P99024	Q7TMM9; Q9D6F9; P99024; P68372; Q9CWF2	0	3	1	0	1	1	933.461	2798.37	2798.34	8.89	0.0083	HCD (High Energy Collision Dissociation)	MS2	0	17.751	59.1226	41843	MS201900102_Con1.raw	F1		65	45	38	0.000103481	0	3.176e-07	10490575	59.15
	FALSE	High	[R].FPGQLNADLR.[K]			0.000171563	0	4	8	5	Q7TMM9; Q9D6F9; P99024; Q922F4	Q7TMM9 [242-251]; Q9D6F9 [242-251]; P99024 [242-251]; Q922F4 [242-251]	0	1130.6	0	100	Shared	High	High	0	0.0001439	63	29.5	R.FPGQLNADLR.K	[242-251]		Used
		Checked	Confidence	Identifying Node	PSM Ambiguity	Annotated Sequence	Modifications	# Protein Groups	# Proteins	Master Protein Accessions	Protein Accessions	# Missed Cleavages	Charge	DeltaScore	DeltaCn	Rank	Search Engine Rank	m/z [Da]	MH+ [Da]	Theo. MH+ [Da]	DeltaM [ppm]	Deltam/z [Da]	Activation Type	MS Order	Isolation Interference [%]	Ion Inject Time [ms]	RT [min]	First Scan	Spectrum File	File ID	Quan Info	Ions Score	Identity Strict	Identity Relaxed	Expectation Value	Percolator q-Value	Percolator PEP	Precursor Abundance	Apex RT [min]
		FALSE	High	Mascot (A5)	Unambiguous	[R].FPGQLNADLR.[K]		4	8	Q7TMM9; Q9D6F9; P99024; Q922F4	Q7TMM9; Q9D6F9; Q9ERD7; A2AQ07; P99024; P68372; Q9CWF2; Q922F4	0	2	0.873	0	1	1	565.804	1130.6	1130.6	5.6	0.00316	HCD (High Energy Collision Dissociation)	MS2	0	25	30.6335	15649	MS201900102_Con1.raw	F1		63	41	34	6.94402e-05	0	0.0001439
		FALSE	High	Mascot (A5)	Unambiguous	[R].FPGQLNADLR.[K]		4	8	Q7TMM9; Q9D6F9; P99024; Q922F4	Q7TMM9; Q9D6F9; Q9ERD7; A2AQ07; P99024; P68372; Q9CWF2; Q922F4	0	2	0.9444	0	1	1	565.805	1130.6	1130.6	6.57	0.00371	HCD (High Energy Collision Dissociation)	MS2	0	25	29.3383	14526	MS201900102_Con1.raw	F1		54	40	33	0.000444913	0	0.0001229	17558940	29.5
		FALSE	High	Mascot (A5)	Unambiguous	[R].FPGQLNADLR.[K]		4	8	Q7TMM9; Q9D6F9; P99024; Q922F4	Q7TMM9; Q9D6F9; Q9ERD7; A2AQ07; P99024; P68372; Q9CWF2; Q922F4	0	2	0.8913	0	1	1	565.806	1130.6	1130.6	8.08	0.00457	HCD (High Energy Collision Dissociation)	MS2	0	23.554	29.783	14897	MS201900102_Con1.raw	F1		46	40	33	0.00319532	0	0.001142	17558940	29.5
		FALSE	High	Mascot (A5)	Unambiguous	[R].FPGQLNADLR.[K]		4	8	Q7TMM9; Q9D6F9; P99024; Q922F4	Q7TMM9; Q9D6F9; Q9ERD7; A2AQ07; P99024; P68372; Q9CWF2; Q922F4	0	2	0.8621	0	1	1	565.806	1130.61	1130.6	8.94	0.00506	HCD (High Energy Collision Dissociation)	MS2	0	23.751	30.2062	15294	MS201900102_Con1.raw	F1		58	40	33	0.000175776	0	0.0003616
		FALSE	High	Mascot (A5)	Unambiguous	[R].FPGQLNADLR.[K]		4	8	Q7TMM9; Q9D6F9; P99024; Q922F4	Q7TMM9; Q9D6F9; Q9ERD7; A2AQ07; P99024; P68372; Q9CWF2; Q922F4	0	2	0.9615	0	1	1	565.805	1130.6	1130.6	6.68	0.00377	HCD (High Energy Collision Dissociation)	MS2	21.2557	19.898	31.369	16277	MS201900102_Con1.raw	F1		52	40	33	0.000757313	0.0004707	0.002299
	FALSE	High	[K].GHYTEGAELVDSVLDVVRK.[E]			0.000426138	0	3	6	1	Q7TMM9; P99024; Q922F4	Q7TMM9 [104-122]; P99024 [104-122]; Q922F4 [104-122]	1	2087.08	0	100	Shared	High	High	0	0.0003159	32	48.92	K.GHYTEGAELVDSVLDVVRK.E	[104-122]		Used
		Checked	Confidence	Identifying Node	PSM Ambiguity	Annotated Sequence	Modifications	# Protein Groups	# Proteins	Master Protein Accessions	Protein Accessions	# Missed Cleavages	Charge	DeltaScore	DeltaCn	Rank	Search Engine Rank	m/z [Da]	MH+ [Da]	Theo. MH+ [Da]	DeltaM [ppm]	Deltam/z [Da]	Activation Type	MS Order	Isolation Interference [%]	Ion Inject Time [ms]	RT [min]	First Scan	Spectrum File	File ID	Quan Info	Ions Score	Identity Strict	Identity Relaxed	Expectation Value	Percolator q-Value	Percolator PEP	Precursor Abundance	Apex RT [min]
		FALSE	High	Mascot (A5)	Unambiguous	[K].GHYTEGAELVDSVLDVVRK.[E]		3	6	Q7TMM9; P99024; Q922F4	Q7TMM9; Q9ERD7; P99024; P68372; Q9CWF2; Q922F4	1	3	1	0	1	1	696.369	2087.09	2087.08	8.16	0.00568	HCD (High Energy Collision Dissociation)	MS2	28.7227	12.748	48.8127	34789	MS201900102_Con1.raw	F1		32	41	34	0.100497	0	0.0003159	7.61863e+06	48.92
	FALSE	High	[K].GHYTEGAELVDSVLDVVR.[K]			7.79497e-05	0	3	6	3	Q7TMM9; P99024; Q922F4	Q7TMM9 [104-121]; P99024 [104-121]; Q922F4 [104-121]	0	1958.98	0	100	Shared	High	High	0	5.455e-05	74	56.64	K.GHYTEGAELVDSVLDVVR.K	[104-121]		Used
		Checked	Confidence	Identifying Node	PSM Ambiguity	Annotated Sequence	Modifications	# Protein Groups	# Proteins	Master Protein Accessions	Protein Accessions	# Missed Cleavages	Charge	DeltaScore	DeltaCn	Rank	Search Engine Rank	m/z [Da]	MH+ [Da]	Theo. MH+ [Da]	DeltaM [ppm]	Deltam/z [Da]	Activation Type	MS Order	Isolation Interference [%]	Ion Inject Time [ms]	RT [min]	First Scan	Spectrum File	File ID	Quan Info	Ions Score	Identity Strict	Identity Relaxed	Expectation Value	Percolator q-Value	Percolator PEP	Precursor Abundance	Apex RT [min]
		FALSE	High	Mascot (A5)	Unambiguous	[K].GHYTEGAELVDSVLDVVR.[K]		3	6	Q7TMM9; P99024; Q922F4	Q7TMM9; Q9ERD7; P99024; P68372; Q9CWF2; Q922F4	0	3	1	0	1	1	653.672	1959	1958.98	9.37	0.00612	HCD (High Energy Collision Dissociation)	MS2	0	25	56.4426	39105	MS201900102_Con1.raw	F1		28	42	35	0.306493	0	0.0005511	25320072	56.64
		FALSE	High	Mascot (A5)	Unambiguous	[K].GHYTEGAELVDSVLDVVR.[K]		3	6	Q7TMM9; P99024; Q922F4	Q7TMM9; Q9ERD7; P99024; P68372; Q9CWF2; Q922F4	0	2	1	0	1	1	980.004	1959	1958.98	9.57	0.00937	HCD (High Energy Collision Dissociation)	MS2	0	25	40.441	25366	MS201900102_Con1.raw	F1		74	42	35	7.35921e-06	0	5.455e-05	473777	40.42
		FALSE	High	Mascot (A5)	Unambiguous	[K].GHYTEGAELVDSVLDVVR.[K]		3	6	Q7TMM9; P99024; Q922F4	Q7TMM9; Q9ERD7; P99024; P68372; Q9CWF2; Q922F4	0	3	1	0	1	1	653.671	1959	1958.98	8.44	0.00551	HCD (High Energy Collision Dissociation)	MS2	1.68222	8.385	56.8958	39522	MS201900102_Con1.raw	F1		62	42	35	0.000121845	0	8.151e-05	25320072	56.64
	FALSE	High	[K].LAVNMVPFPR.[L]	1xOxidation [M5]		0.000717206	0	4	8	3	Q7TMM9; Q9D6F9; P99024; Q922F4	Q7TMM9 [253-262]; Q9D6F9 [253-262]; P99024 [253-262]; Q922F4 [253-262]	0	1159.63	0	100	Shared	High	High	0	0.0005401	44	33.45	K.LAVNMVPFPR.L	[253-262]		Used
		Checked	Confidence	Identifying Node	PSM Ambiguity	Annotated Sequence	Modifications	# Protein Groups	# Proteins	Master Protein Accessions	Protein Accessions	# Missed Cleavages	Charge	DeltaScore	DeltaCn	Rank	Search Engine Rank	m/z [Da]	MH+ [Da]	Theo. MH+ [Da]	DeltaM [ppm]	Deltam/z [Da]	Activation Type	MS Order	Isolation Interference [%]	Ion Inject Time [ms]	RT [min]	First Scan	Spectrum File	File ID	Quan Info	Ions Score	Identity Strict	Identity Relaxed	Expectation Value	Percolator q-Value	Percolator PEP	Precursor Abundance	Apex RT [min]
		FALSE	High	Mascot (A5)	Unambiguous	[K].LAVNmVPFPR.[L]	M5(Oxidation)	4	8	Q7TMM9; Q9D6F9; P99024; Q922F4	Q7TMM9; Q9D6F9; Q9ERD7; A2AQ07; P99024; P68372; Q9CWF2; Q922F4	0	2	0.9773	0	1	1	580.323	1159.64	1159.63	9.03	0.00523	HCD (High Energy Collision Dissociation)	MS2	0	25	33.6167	18108	MS201900102_Con1.raw	F1		44	39	32	0.00386819	0	0.0005401	7107877	33.45
		FALSE	High	Mascot (A5)	Unambiguous	[K].LAVNmVPFPR.[L]	M5(Oxidation)	4	8	Q7TMM9; Q9D6F9; P99024; Q922F4	Q7TMM9; Q9D6F9; Q9ERD7; A2AQ07; P99024; P68372; Q9CWF2; Q922F4	0	2	1	0	1	1	580.33	1159.65	1159.63	19.56	0.01134	HCD (High Energy Collision Dissociation)	MS2	25.9586	12.021	32.878	17551	MS201900102_Con1.raw	F1	Not Reliable	41	38	31	0.00630451	0	0.0008969
		FALSE	High	Mascot (A5)	Unambiguous	[K].LAVNmVPFPR.[L]	M5(Oxidation)	4	8	Q7TMM9; Q9D6F9; P99024; Q922F4	Q7TMM9; Q9D6F9; Q9ERD7; A2AQ07; P99024; P68372; Q9CWF2; Q922F4	0	2	0.9756	0	1	1	580.324	1159.64	1159.63	9.13	0.0053	HCD (High Energy Collision Dissociation)	MS2	18.7899	19.629	33.1542	17745	MS201900102_Con1.raw	F1		41	39	32	0.00771805	0.0004707	0.005392	6.20909e+06	32.98
	FALSE	High	[R].IMNTFSVVPSPK.[V]			0.000702278	0	2	4	2	Q9D6F9; P99024	Q9D6F9 [163-174]; P99024 [163-174]	0	1319.7	0	100	Shared	High	High	0	0.0005279	37	34.36	R.IMNTFSVVPSPK.V	[163-174]		Used
		Checked	Confidence	Identifying Node	PSM Ambiguity	Annotated Sequence	Modifications	# Protein Groups	# Proteins	Master Protein Accessions	Protein Accessions	# Missed Cleavages	Charge	DeltaScore	DeltaCn	Rank	Search Engine Rank	m/z [Da]	MH+ [Da]	Theo. MH+ [Da]	DeltaM [ppm]	Deltam/z [Da]	Activation Type	MS Order	Isolation Interference [%]	Ion Inject Time [ms]	RT [min]	First Scan	Spectrum File	File ID	Quan Info	Ions Score	Identity Strict	Identity Relaxed	Expectation Value	Percolator q-Value	Percolator PEP	Precursor Abundance	Apex RT [min]
		FALSE	High	Mascot (A5)	Unambiguous	[R].IMNTFSVVPSPK.[V]		2	4	Q9D6F9; P99024	Q9D6F9; Q9ERD7; P99024; P68372	0	2	1	0	1	1	660.359	1319.71	1319.7	6.31	0.00416	HCD (High Energy Collision Dissociation)	MS2	54.9899	4.413	34.4263	18775	MS201900102_Con1.raw	F1		37	39	32	0.0197294	0	0.0005279	25236126	34.36
		FALSE	High	Mascot (A5)	Unambiguous	[R].IMNTFSVVPSPK.[V]		2	4	Q9D6F9; P99024	Q9D6F9; Q9ERD7; P99024; P68372	0	2	1	0	1	1	660.359	1319.71	1319.7	5.94	0.00392	HCD (High Energy Collision Dissociation)	MS2		4.475	34.0035	18431	MS201900102_Con1.raw	F1		12	39	32	5.62487	0.004901	0.1636	25236126	34.36
	FALSE	High	[R].ISEQFTAMFR.[R]			0.000932872	0	3	6	2	Q7TMM9; Q9D6F9; P99024	Q7TMM9 [381-390]; Q9D6F9 [381-390]; P99024 [381-390]	0	1229.6	0	100	Shared	High	High	0.0004707	0.001787	62	40.51	R.ISEQFTAMFR.R	[381-390]		Used
		Checked	Confidence	Identifying Node	PSM Ambiguity	Annotated Sequence	Modifications	# Protein Groups	# Proteins	Master Protein Accessions	Protein Accessions	# Missed Cleavages	Charge	DeltaScore	DeltaCn	Rank	Search Engine Rank	m/z [Da]	MH+ [Da]	Theo. MH+ [Da]	DeltaM [ppm]	Deltam/z [Da]	Activation Type	MS Order	Isolation Interference [%]	Ion Inject Time [ms]	RT [min]	First Scan	Spectrum File	File ID	Quan Info	Ions Score	Identity Strict	Identity Relaxed	Expectation Value	Percolator q-Value	Percolator PEP	Precursor Abundance	Apex RT [min]
		FALSE	High	Mascot (A5)	Unambiguous	[R].ISEQFTAMFR.[R]		3	6	Q7TMM9; Q9D6F9; P99024	Q7TMM9; Q9D6F9; Q9ERD7; P99024; P68372; Q9CWF2	0	2	0.8136	0	1	1	615.308	1229.61	1229.6	7.64	0.0047	HCD (High Energy Collision Dissociation)	MS2	0	25	40.3305	25233	MS201900102_Con1.raw	F1		59	41	34	0.000184969	0	0.0007067	12233424	40.51
		FALSE	High	Mascot (A5)	Unambiguous	[R].ISEQFTAMFR.[R]		3	6	Q7TMM9; Q9D6F9; P99024	Q7TMM9; Q9D6F9; Q9ERD7; P99024; P68372; Q9CWF2	0	2	0.8065	0	1	1	615.308	1229.61	1229.6	7.94	0.00488	HCD (High Energy Collision Dissociation)	MS2	0	25	40.7827	25776	MS201900102_Con1.raw	F1		62	41	34	8.45794e-05	0.0004707	0.001787	12233424	40.51
	FALSE	High	[R].ISVYYNEATGGK.[Y]			6.34944e-05	0	1	1	2	P99024	P99024 [47-58]	0	1301.64	0	100		High	High	0	4.41e-05	71	22.67	R.ISVYYNEATGGK.Y	[47-58]		Used
		Checked	Confidence	Identifying Node	PSM Ambiguity	Annotated Sequence	Modifications	# Protein Groups	# Proteins	Master Protein Accessions	Protein Accessions	# Missed Cleavages	Charge	DeltaScore	DeltaCn	Rank	Search Engine Rank	m/z [Da]	MH+ [Da]	Theo. MH+ [Da]	DeltaM [ppm]	Deltam/z [Da]	Activation Type	MS Order	Isolation Interference [%]	Ion Inject Time [ms]	RT [min]	First Scan	Spectrum File	File ID	Quan Info	Ions Score	Identity Strict	Identity Relaxed	Expectation Value	Percolator q-Value	Percolator PEP	Precursor Abundance	Apex RT [min]
		FALSE	High	Mascot (A5)	Unambiguous	[R].ISVYYNEATGGK.[Y]		1	1	P99024	P99024	0	2	0.8873	0	1	1	651.327	1301.65	1301.64	6.98	0.00454	HCD (High Energy Collision Dissociation)	MS2	0	18.906	22.5484	10226	MS201900102_Con1.raw	F1		71	41	34	1.2112e-05	0	4.41e-05	26021588	22.67
		FALSE	High	Mascot (A5)	Unambiguous	[R].ISVYYNEATGGK.[Y]		1	1	P99024	P99024	0	2	0.8333	0	1	1	651.327	1301.65	1301.64	7.73	0.00503	HCD (High Energy Collision Dissociation)	MS2	0	22.611	22.9806	10449	MS201900102_Con1.raw	F1		54	41	34	0.000589452	0	7.102e-05	26021588	22.67
	FALSE	High	[K].MAVTFIGNSTAIQELFK.[R]	1xOxidation [M1]		0.00149731	0	1	1	2	P99024	P99024 [363-379]	0	1885.97	0	100		High	High	0.0004707	0.006675	13	61.1	K.MAVTFIGNSTAIQELFK.R	[363-379]		Used
		Checked	Confidence	Identifying Node	PSM Ambiguity	Annotated Sequence	Modifications	# Protein Groups	# Proteins	Master Protein Accessions	Protein Accessions	# Missed Cleavages	Charge	DeltaScore	DeltaCn	Rank	Search Engine Rank	m/z [Da]	MH+ [Da]	Theo. MH+ [Da]	DeltaM [ppm]	Deltam/z [Da]	Activation Type	MS Order	Isolation Interference [%]	Ion Inject Time [ms]	RT [min]	First Scan	Spectrum File	File ID	Quan Info	Ions Score	Identity Strict	Identity Relaxed	Expectation Value	Percolator q-Value	Percolator PEP	Precursor Abundance	Apex RT [min]
		FALSE	High	Mascot (A5)	Unambiguous	[K].mAVTFIGNSTAIQELFK.[R]	M1(Oxidation)	1	1	P99024	P99024	0	2	1	0	1	1	943.491	1885.97	1885.97	1.04	0.00098	HCD (High Energy Collision Dissociation)	MS2	78.799	25	60.901	43465	MS201900102_Con1.raw	F1		8	42	35	26.9174	0	0.001158	4550546	61.1
		FALSE	High	Mascot (A5)	Unambiguous	[K].mAVTFIGNSTAIQELFK.[R]	M1(Oxidation)	1	1	P99024	P99024	0	2	1	0	1	1	943.495	1885.98	1885.97	5.77	0.00544	HCD (High Energy Collision Dissociation)	MS2	72.9322	7.831	61.3306	43867	MS201900102_Con1.raw	F1		13	41	34	6.9994	0.0004707	0.006675	4550546	61.1
	FALSE	High	[K].MAVTFIGNSTAIQELFK.[R]			5.27664e-06	0	1	1	2	P99024	P99024 [363-379]	0	1869.98	0	100		High	High	0	3.36e-06	53	66.11	K.MAVTFIGNSTAIQELFK.R	[363-379]		Used
		Checked	Confidence	Identifying Node	PSM Ambiguity	Annotated Sequence	Modifications	# Protein Groups	# Proteins	Master Protein Accessions	Protein Accessions	# Missed Cleavages	Charge	DeltaScore	DeltaCn	Rank	Search Engine Rank	m/z [Da]	MH+ [Da]	Theo. MH+ [Da]	DeltaM [ppm]	Deltam/z [Da]	Activation Type	MS Order	Isolation Interference [%]	Ion Inject Time [ms]	RT [min]	First Scan	Spectrum File	File ID	Quan Info	Ions Score	Identity Strict	Identity Relaxed	Expectation Value	Percolator q-Value	Percolator PEP	Precursor Abundance	Apex RT [min]
		FALSE	High	Mascot (A5)	Unambiguous	[K].MAVTFIGNSTAIQELFK.[R]		1	1	P99024	P99024	0	2	1	0	1	1	935.502	1870	1869.98	10.15	0.00949	HCD (High Energy Collision Dissociation)	MS2	66.5551	25	65.926	48528	MS201900102_Con1.raw	F1		34	40	33	0.0487338	0	0.0001495	4.8445e+06	66.11
		FALSE	High	Mascot (A5)	Unambiguous	[K].MAVTFIGNSTAIQELFK.[R]		1	1	P99024	P99024	0	2	1	0	1	1	935.503	1870	1869.98	11.13	0.0104	HCD (High Energy Collision Dissociation)	MS2	28.2385	25	65.9119	48512	MS201900102_Con1.raw	F1		53	40	33	0.000544289	0	3.36e-06	4.8445e+06	66.11
	FALSE	High	[K].LAVNMVPFPR.[L]			0.000817964	0	4	8	3	Q7TMM9; Q9D6F9; P99024; Q922F4	Q7TMM9 [253-262]; Q9D6F9 [253-262]; P99024 [253-262]; Q922F4 [253-262]	0	1143.63	0	100	Shared	High	High	0	0.0006193	52	40.39	K.LAVNMVPFPR.L	[253-262]		Used
		Checked	Confidence	Identifying Node	PSM Ambiguity	Annotated Sequence	Modifications	# Protein Groups	# Proteins	Master Protein Accessions	Protein Accessions	# Missed Cleavages	Charge	DeltaScore	DeltaCn	Rank	Search Engine Rank	m/z [Da]	MH+ [Da]	Theo. MH+ [Da]	DeltaM [ppm]	Deltam/z [Da]	Activation Type	MS Order	Isolation Interference [%]	Ion Inject Time [ms]	RT [min]	First Scan	Spectrum File	File ID	Quan Info	Ions Score	Identity Strict	Identity Relaxed	Expectation Value	Percolator q-Value	Percolator PEP	Precursor Abundance	Apex RT [min]
		FALSE	High	Mascot (A5)	Unambiguous	[K].LAVNMVPFPR.[L]		4	8	Q7TMM9; Q9D6F9; P99024; Q922F4	Q7TMM9; Q9D6F9; Q9ERD7; A2AQ07; P99024; P68372; Q9CWF2; Q922F4	0	2	0.8077	0	1	1	572.325	1143.64	1143.63	8.02	0.00458	HCD (High Energy Collision Dissociation)	MS2	10.7246	25	40.668	25642	MS201900102_Con1.raw	F1		52	39	32	0.000495343	0	0.0006193	17076352	40.39
		FALSE	High	Mascot (A5)	Unambiguous	[K].LAVNMVPFPR.[L]		4	8	Q7TMM9; Q9D6F9; P99024; Q922F4	Q7TMM9; Q9D6F9; Q9ERD7; A2AQ07; P99024; P68372; Q9CWF2; Q922F4	0	2	0.8039	0	1	1	572.324	1143.64	1143.63	4.92	0.00281	HCD (High Energy Collision Dissociation)	MS2	50.3912	25	40.189	25062	MS201900102_Con1.raw	F1		51	39	32	0.000679781	0.0004707	0.003236	17076352	40.39
		FALSE	High	Mascot (A5)	Unambiguous	[K].LAVNMVPFPR.[L]		4	8	Q7TMM9; Q9D6F9; P99024; Q922F4	Q7TMM9; Q9D6F9; Q9ERD7; A2AQ07; P99024; P68372; Q9CWF2; Q922F4	0	2	0.7778	0	1	1	572.311	1143.62	1143.63	-16.75	-0.00958	HCD (High Energy Collision Dissociation)	MS2	54.1231	25	40.9494	25978	MS201900102_Con1.raw	F1		36	40	33	0.030704	0.0004707	0.001928
	FALSE	High	[K].NSSYFVEWIPNNVK.[TV]			0.000288762	0	4	7	1	Q7TMM9; Q9D6F9; P99024; Q922F4	Q7TMM9 [337-350]; Q9D6F9 [337-350]; P99024 [337-350]; Q922F4 [337-350]	0	1696.83	0	100	Shared	High	High	0	0.0002107	46	49.2	K.NSSYFVEWIPNNVK.T	[337-350]		Used
		Checked	Confidence	Identifying Node	PSM Ambiguity	Annotated Sequence	Modifications	# Protein Groups	# Proteins	Master Protein Accessions	Protein Accessions	# Missed Cleavages	Charge	DeltaScore	DeltaCn	Rank	Search Engine Rank	m/z [Da]	MH+ [Da]	Theo. MH+ [Da]	DeltaM [ppm]	Deltam/z [Da]	Activation Type	MS Order	Isolation Interference [%]	Ion Inject Time [ms]	RT [min]	First Scan	Spectrum File	File ID	Quan Info	Ions Score	Identity Strict	Identity Relaxed	Expectation Value	Percolator q-Value	Percolator PEP	Precursor Abundance	Apex RT [min]
		FALSE	High	Mascot (A5)	Unambiguous	[K].NSSYFVEWIPNNVK.[TV]		4	7	Q7TMM9; Q9D6F9; P99024; Q922F4	Q7TMM9; Q9D6F9; Q9ERD7; P99024; P68372; Q9CWF2; Q922F4	0	2	0.9565	0	1	1	848.929	1696.85	1696.83	10.14	0.0086	HCD (High Energy Collision Dissociation)	MS2	18.2472	24.824	49.0208	35019	MS201900102_Con1.raw	F1		46	42	35	0.0051057	0	0.0002107	38086028	49.2
	FALSE	High	[R].LHFFMPGFAPLTSR.[G]			0.00210709	0	3	5	1	Q7TMM9; Q9D6F9; P99024	Q7TMM9 [263-276]; Q9D6F9 [263-276]; P99024 [263-276]	0	1620.84	0	100	Shared	High	High	0	0.001642	44	49.43	R.LHFFMPGFAPLTSR.G	[263-276]		Used
		Checked	Confidence	Identifying Node	PSM Ambiguity	Annotated Sequence	Modifications	# Protein Groups	# Proteins	Master Protein Accessions	Protein Accessions	# Missed Cleavages	Charge	DeltaScore	DeltaCn	Rank	Search Engine Rank	m/z [Da]	MH+ [Da]	Theo. MH+ [Da]	DeltaM [ppm]	Deltam/z [Da]	Activation Type	MS Order	Isolation Interference [%]	Ion Inject Time [ms]	RT [min]	First Scan	Spectrum File	File ID	Quan Info	Ions Score	Identity Strict	Identity Relaxed	Expectation Value	Percolator q-Value	Percolator PEP	Precursor Abundance	Apex RT [min]
		FALSE	High	Mascot (A5)	Unambiguous	[R].LHFFMPGFAPLTSR.[G]		3	5	Q7TMM9; Q9D6F9; P99024	Q7TMM9; Q9D6F9; P99024; P68372; Q9CWF2	0	2	0.7045	0	1	1	810.928	1620.85	1620.84	8.11	0.00658	HCD (High Energy Collision Dissociation)	MS2	0	25	49.3915	35427	MS201900102_Con1.raw	F1		44	41	34	0.00527559	0	0.001642	5.77768e+06	49.43
	FALSE	High	[R].LHFFMPGFAPLTSR.[G]	1xOxidation [M5]		3.27295e-05	0	3	5	2	Q7TMM9; Q9D6F9; P99024	Q7TMM9 [263-276]; Q9D6F9 [263-276]; P99024 [263-276]	0	1636.83	0	100	Shared	High	High	0	2.22e-05	49	43.39	R.LHFFMPGFAPLTSR.G	[263-276]		Used
		Checked	Confidence	Identifying Node	PSM Ambiguity	Annotated Sequence	Modifications	# Protein Groups	# Proteins	Master Protein Accessions	Protein Accessions	# Missed Cleavages	Charge	DeltaScore	DeltaCn	Rank	Search Engine Rank	m/z [Da]	MH+ [Da]	Theo. MH+ [Da]	DeltaM [ppm]	Deltam/z [Da]	Activation Type	MS Order	Isolation Interference [%]	Ion Inject Time [ms]	RT [min]	First Scan	Spectrum File	File ID	Quan Info	Ions Score	Identity Strict	Identity Relaxed	Expectation Value	Percolator q-Value	Percolator PEP	Precursor Abundance	Apex RT [min]
		FALSE	High	Mascot (A5)	Unambiguous	[R].LHFFmPGFAPLTSR.[G]	M5(Oxidation)	3	5	Q7TMM9; Q9D6F9; P99024	Q7TMM9; Q9D6F9; P99024; P68372; Q9CWF2	0	3	1	0	1	1	546.288	1636.85	1636.83	11.77	0.00642	HCD (High Energy Collision Dissociation)	MS2	15.5237	25	43.2517	28634	MS201900102_Con1.raw	F1		49	41	34	0.00197796	0	2.22e-05	3.54724e+06	43.39
		FALSE	High	Mascot (A5)	Unambiguous	[R].LHFFmPGFAPLTSR.[G]	M5(Oxidation)	3	5	Q7TMM9; Q9D6F9; P99024	Q7TMM9; Q9D6F9; P99024; P68372; Q9CWF2	0	3	1	0	1	1	546.286	1636.84	1636.83	8.75	0.00477	HCD (High Energy Collision Dissociation)	MS2	81.8011	25	43.7275	29199	MS201900102_Con1.raw	F1		12	41	34	9.80028	0.0004707	0.01803	3.54724e+06	43.39
	FALSE	High	[R].AILVDLEPGTMDSVR.[S]			5.5089e-05	0	2	4	2	Q7TMM9; P99024	Q7TMM9 [63-77]; P99024 [63-77]	0	1615.84	0	100	Shared	High	High	0	3.811e-05	58	45.15	R.AILVDLEPGTMDSVR.S	[63-77]		Used
		Checked	Confidence	Identifying Node	PSM Ambiguity	Annotated Sequence	Modifications	# Protein Groups	# Proteins	Master Protein Accessions	Protein Accessions	# Missed Cleavages	Charge	DeltaScore	DeltaCn	Rank	Search Engine Rank	m/z [Da]	MH+ [Da]	Theo. MH+ [Da]	DeltaM [ppm]	Deltam/z [Da]	Activation Type	MS Order	Isolation Interference [%]	Ion Inject Time [ms]	RT [min]	First Scan	Spectrum File	File ID	Quan Info	Ions Score	Identity Strict	Identity Relaxed	Expectation Value	Percolator q-Value	Percolator PEP	Precursor Abundance	Apex RT [min]
		FALSE	High	Mascot (A5)	Unambiguous	[R].AILVDLEPGTMDSVR.[S]		2	4	Q7TMM9; P99024	Q7TMM9; Q9ERD7; P99024; Q9CWF2	0	2	0.9483	0	1	1	808.429	1615.85	1615.84	9.6	0.00775	HCD (High Energy Collision Dissociation)	MS2	0	21.829	45.3765	30967	MS201900102_Con1.raw	F1		58	41	34	0.000205446	0	3.811e-05	30039578	45.15
		FALSE	High	Mascot (A5)	Unambiguous	[R].AILVDLEPGTMDSVR.[S]		2	4	Q7TMM9; P99024	Q7TMM9; Q9ERD7; P99024; Q9CWF2	0	2	0.9333	0	1	1	808.43	1615.85	1615.84	9.97	0.00806	HCD (High Energy Collision Dissociation)	MS2	0	25	44.9194	30470	MS201900102_Con1.raw	F1		45	41	34	0.00399293	0.0004707	0.002838	30039578	45.15
	FALSE	High	[R].ALTVPELTQQVFDAK.[N]			0.000435197	0	1	1	1	P99024	P99024 [283-297]	0	1659.9	0		No Quan Values	High	High	0	0.0003224	51		R.ALTVPELTQQVFDAK.N	[283-297]		Not Used
		Checked	Confidence	Identifying Node	PSM Ambiguity	Annotated Sequence	Modifications	# Protein Groups	# Proteins	Master Protein Accessions	Protein Accessions	# Missed Cleavages	Charge	DeltaScore	DeltaCn	Rank	Search Engine Rank	m/z [Da]	MH+ [Da]	Theo. MH+ [Da]	DeltaM [ppm]	Deltam/z [Da]	Activation Type	MS Order	Isolation Interference [%]	Ion Inject Time [ms]	RT [min]	First Scan	Spectrum File	File ID	Quan Info	Ions Score	Identity Strict	Identity Relaxed	Expectation Value	Percolator q-Value	Percolator PEP	Precursor Abundance	Apex RT [min]
		FALSE	High	Mascot (A5)	Unambiguous	[R].ALTVPELTQQVFDAK.[N]		1	1	P99024	P99024	0	2	1	0	1	1	830.46	1659.91	1659.9	10.58	0.00878	HCD (High Energy Collision Dissociation)	MS2	0	25	49.0462	35052	MS201900102_Con1.raw	F1		51	39	32	0.000643747	0	0.0003224	1.76378e+06	49.37
	FALSE	High	[K].EVDEQMLNVQNK.[N]			0.000622278	0	2	4	2	Q7TMM9; P99024	Q7TMM9 [325-336]; P99024 [325-336]	0	1446.69	0	100	Shared	High	High	0	0.0004664	51	24.72	K.EVDEQMLNVQNK.N	[325-336]		Used
		Checked	Confidence	Identifying Node	PSM Ambiguity	Annotated Sequence	Modifications	# Protein Groups	# Proteins	Master Protein Accessions	Protein Accessions	# Missed Cleavages	Charge	DeltaScore	DeltaCn	Rank	Search Engine Rank	m/z [Da]	MH+ [Da]	Theo. MH+ [Da]	DeltaM [ppm]	Deltam/z [Da]	Activation Type	MS Order	Isolation Interference [%]	Ion Inject Time [ms]	RT [min]	First Scan	Spectrum File	File ID	Quan Info	Ions Score	Identity Strict	Identity Relaxed	Expectation Value	Percolator q-Value	Percolator PEP	Precursor Abundance	Apex RT [min]
		FALSE	High	Mascot (A5)	Unambiguous	[K].EVDEQMLNVQNK.[N]		2	4	Q7TMM9; P99024	Q7TMM9; P99024; P68372; Q9CWF2	0	2	1	0	1	1	723.852	1446.7	1446.69	4.77	0.00345	HCD (High Energy Collision Dissociation)	MS2	0	20.407	24.6236	11412	MS201900102_Con1.raw	F1		51	42	35	0.00134381	0	0.0004664	33490334	24.72
		FALSE	High	Mascot (A5)	Unambiguous	[K].EVDEQMLNVQNK.[N]		2	4	Q7TMM9; P99024	Q7TMM9; P99024; P68372; Q9CWF2	0	2	1	0	1	1	723.854	1446.7	1446.69	7.97	0.00577	HCD (High Energy Collision Dissociation)	MS2	0	5.311	24.6585	11437	MS201900102_Con1.raw	F1		47	42	35	0.00347947	0.0004707	0.005461	33490334	24.72
	FALSE	High	[R].YLTVAAVFR.[G]			0.00763379	0.000581891	2	3	2	Q9D6F9; P99024	Q9D6F9 [310-318]; P99024 [310-318]	0	1039.59	0	100	Shared	High	High	0.0004707	0.006214	49	39.96	R.YLTVAAVFR.G	[310-318]		Used
		Checked	Confidence	Identifying Node	PSM Ambiguity	Annotated Sequence	Modifications	# Protein Groups	# Proteins	Master Protein Accessions	Protein Accessions	# Missed Cleavages	Charge	DeltaScore	DeltaCn	Rank	Search Engine Rank	m/z [Da]	MH+ [Da]	Theo. MH+ [Da]	DeltaM [ppm]	Deltam/z [Da]	Activation Type	MS Order	Isolation Interference [%]	Ion Inject Time [ms]	RT [min]	First Scan	Spectrum File	File ID	Quan Info	Ions Score	Identity Strict	Identity Relaxed	Expectation Value	Percolator q-Value	Percolator PEP	Precursor Abundance	Apex RT [min]
		FALSE	High	Mascot (A5)	Unambiguous	[R].YLTVAAVFR.[G]		2	3	Q9D6F9; P99024	Q9D6F9; P99024; P68372	0	2	0.8776	0	1	1	520.304	1039.6	1039.59	7.46	0.00388	HCD (High Energy Collision Dissociation)	MS2	34.0626	25	39.7757	24561	MS201900102_Con1.raw	F1		49	34	27	0.000377678	0.0004707	0.006214	18000516	39.96
		FALSE	High	Mascot (A5)	Unambiguous	[R].YLTVAAVFR.[G]		2	3	Q9D6F9; P99024	Q9D6F9; P99024; P68372	0	2	0.8125	0	1	1	520.304	1039.6	1039.59	7.57	0.00394	HCD (High Energy Collision Dissociation)	MS2	47.2673	25	40.2841	25176	MS201900102_Con1.raw	F1		16	34	27	0.845515	0.0004707	0.00626	18000516	39.96
	FALSE	High	[K].EVDEQMLNVQNK.[N]	1xOxidation [M6]		0.00694499	0.000581891	2	4	1	Q7TMM9; P99024	Q7TMM9 [325-336]; P99024 [325-336]	0	1462.68	0	100	Shared	High	High	0.0004707	0.005637	35	17.67	K.EVDEQMLNVQNK.N	[325-336]		Used
		Checked	Confidence	Identifying Node	PSM Ambiguity	Annotated Sequence	Modifications	# Protein Groups	# Proteins	Master Protein Accessions	Protein Accessions	# Missed Cleavages	Charge	DeltaScore	DeltaCn	Rank	Search Engine Rank	m/z [Da]	MH+ [Da]	Theo. MH+ [Da]	DeltaM [ppm]	Deltam/z [Da]	Activation Type	MS Order	Isolation Interference [%]	Ion Inject Time [ms]	RT [min]	First Scan	Spectrum File	File ID	Quan Info	Ions Score	Identity Strict	Identity Relaxed	Expectation Value	Percolator q-Value	Percolator PEP	Precursor Abundance	Apex RT [min]
		FALSE	High	Mascot (A5)	Unambiguous	[K].EVDEQmLNVQNK.[N]	M6(Oxidation)	2	4	Q7TMM9; P99024	Q7TMM9; P99024; P68372; Q9CWF2	0	2	1	0	1	1	731.852	1462.7	1462.68	8.44	0.00617	HCD (High Energy Collision Dissociation)	MS2	0	18.715	17.5198	6682	MS201900102_Con1.raw	F1		35	42	35	0.0639514	0.0004707	0.005637	16990002	17.67
	FALSE	High	[R].KLAVNMVPFPR.[L]			0.00317456	0.000581891	4	8	1	Q7TMM9; Q9D6F9; P99024; Q922F4	Q7TMM9 [252-262]; Q9D6F9 [252-262]; P99024 [252-262]; Q922F4 [252-262]	1	1271.73	0		No Quan Values	High	High	0.0004707	0.002517	56		R.KLAVNMVPFPR.L	[252-262]		Not Used
		Checked	Confidence	Identifying Node	PSM Ambiguity	Annotated Sequence	Modifications	# Protein Groups	# Proteins	Master Protein Accessions	Protein Accessions	# Missed Cleavages	Charge	DeltaScore	DeltaCn	Rank	Search Engine Rank	m/z [Da]	MH+ [Da]	Theo. MH+ [Da]	DeltaM [ppm]	Deltam/z [Da]	Activation Type	MS Order	Isolation Interference [%]	Ion Inject Time [ms]	RT [min]	First Scan	Spectrum File	File ID	Quan Info	Ions Score	Identity Strict	Identity Relaxed	Expectation Value	Percolator q-Value	Percolator PEP	Precursor Abundance	Apex RT [min]
		FALSE	High	Mascot (A5)	Unambiguous	[R].KLAVNMVPFPR.[L]		4	8	Q7TMM9; Q9D6F9; P99024; Q922F4	Q7TMM9; Q9D6F9; Q9ERD7; A2AQ07; P99024; P68372; Q9CWF2; Q922F4	1	2	0.8036	0	1	1	636.373	1271.74	1271.73	7.7	0.00489	HCD (High Energy Collision Dissociation)	MS2	0	12.963	32.1238	16924	MS201900102_Con1.raw	F1		56	37	30	0.000133761	0.0004707	0.002517	5.95369e+06	32.21
	FALSE	High	[R].AILVDLEPGTMDSVR.[S]	1xOxidation [M11]		0.0293656	0.000581891	2	4	2	Q7TMM9; P99024	Q7TMM9 [63-77]; P99024 [63-77]	0	1631.83	0	100	Shared	High	High	0.0004707	0.02499	25	38.6	R.AILVDLEPGTMDSVR.S	[63-77]		Used
		Checked	Confidence	Identifying Node	PSM Ambiguity	Annotated Sequence	Modifications	# Protein Groups	# Proteins	Master Protein Accessions	Protein Accessions	# Missed Cleavages	Charge	DeltaScore	DeltaCn	Rank	Search Engine Rank	m/z [Da]	MH+ [Da]	Theo. MH+ [Da]	DeltaM [ppm]	Deltam/z [Da]	Activation Type	MS Order	Isolation Interference [%]	Ion Inject Time [ms]	RT [min]	First Scan	Spectrum File	File ID	Quan Info	Ions Score	Identity Strict	Identity Relaxed	Expectation Value	Percolator q-Value	Percolator PEP	Precursor Abundance	Apex RT [min]
		FALSE	High	Mascot (A5)	Unambiguous	[R].AILVDLEPGTmDSVR.[S]	M11(Oxidation)	2	4	Q7TMM9; P99024	Q7TMM9; Q9ERD7; P99024; Q9CWF2	0	2	1	0	1	1	816.427	1631.85	1631.83	9.77	0.00798	HCD (High Energy Collision Dissociation)	MS2	37.1941	25	38.4054	22983	MS201900102_Con1.raw	F1		19	41	34	2.12083	0.0004707	0.0264	15949164	38.6
		FALSE	High	Mascot (A5)	Unambiguous	[R].AILVDLEPGTmDSVR.[S]	M11(Oxidation)	2	4	Q7TMM9; P99024	Q7TMM9; Q9ERD7; P99024; Q9CWF2	0	2	1	0	1	1	816.428	1631.85	1631.83	11.05	0.00901	HCD (High Energy Collision Dissociation)	MS2	56.1188	25	39.5298	24273	MS201900102_Con1.raw	F1		25	41	34	0.450785	0.0004707	0.02499	874591	39.73
	FALSE	High	[R].ISEQFTAMFR.[R]	1xOxidation [M8]		0.010684	0.000581891	3	6	1	Q7TMM9; Q9D6F9; P99024	Q7TMM9 [381-390]; Q9D6F9 [381-390]; P99024 [381-390]	0	1245.59	0	100	Shared	High	High	0.0004707	0.008789	22	31.2	R.ISEQFTAMFR.R	[381-390]		Used
		Checked	Confidence	Identifying Node	PSM Ambiguity	Annotated Sequence	Modifications	# Protein Groups	# Proteins	Master Protein Accessions	Protein Accessions	# Missed Cleavages	Charge	DeltaScore	DeltaCn	Rank	Search Engine Rank	m/z [Da]	MH+ [Da]	Theo. MH+ [Da]	DeltaM [ppm]	Deltam/z [Da]	Activation Type	MS Order	Isolation Interference [%]	Ion Inject Time [ms]	RT [min]	First Scan	Spectrum File	File ID	Quan Info	Ions Score	Identity Strict	Identity Relaxed	Expectation Value	Percolator q-Value	Percolator PEP	Precursor Abundance	Apex RT [min]
		FALSE	High	Mascot (A5)	Unambiguous	[R].ISEQFTAmFR.[R]	M8(Oxidation)	3	6	Q7TMM9; Q9D6F9; P99024	Q7TMM9; Q9D6F9; Q9ERD7; P99024; P68372; Q9CWF2	0	2	1	0	1	1	623.305	1245.6	1245.59	7.21	0.00449	HCD (High Energy Collision Dissociation)	MS2		6.509	31.0628	16009	MS201900102_Con1.raw	F1		22	41	34	0.832566	0.0004707	0.008789	10564331	31.2
	FALSE	High	[R].IMNTFSVVPSPK.[V]	1xOxidation [M2]		0.0096694	0.000581891	2	4	1	Q9D6F9; P99024	Q9D6F9 [163-174]; P99024 [163-174]	0	1335.7	0	100	Shared	High	High	0.0004707	0.007934	43	29.47	R.IMNTFSVVPSPK.V	[163-174]		Used
		Checked	Confidence	Identifying Node	PSM Ambiguity	Annotated Sequence	Modifications	# Protein Groups	# Proteins	Master Protein Accessions	Protein Accessions	# Missed Cleavages	Charge	DeltaScore	DeltaCn	Rank	Search Engine Rank	m/z [Da]	MH+ [Da]	Theo. MH+ [Da]	DeltaM [ppm]	Deltam/z [Da]	Activation Type	MS Order	Isolation Interference [%]	Ion Inject Time [ms]	RT [min]	First Scan	Spectrum File	File ID	Quan Info	Ions Score	Identity Strict	Identity Relaxed	Expectation Value	Percolator q-Value	Percolator PEP	Precursor Abundance	Apex RT [min]
		FALSE	High	Mascot (A5)	Unambiguous	[R].ImNTFSVVPSPK.[V]	M2(Oxidation)	2	4	Q9D6F9; P99024	Q9D6F9; Q9ERD7; P99024; P68372	0	2	1	0	1	1	668.358	1335.71	1335.7	7.57	0.00506	HCD (High Energy Collision Dissociation)	MS2	55.7896	8.713	29.5158	14677	MS201900102_Con1.raw	F1		43	40	33	0.00570602	0.0004707	0.007934	10671408	29.47
	FALSE	High	[K].MAVTFIGNSTAIQELFK.[R]	1xAcetyl [N-Term]	P99024 1xAcetyl [N-Term]	0.172181	0.00605088	1	1	1	P99024	P99024 [363-379]	0	1911.99	0		No Quan Values	High	High	0.004901	0.1557	23		K.MAVTFIGNSTAIQELFK.R	[363-379]	1xAcetyl [N-Term]	Not Used
		Checked	Confidence	Identifying Node	PSM Ambiguity	Annotated Sequence	Modifications	# Protein Groups	# Proteins	Master Protein Accessions	Protein Accessions	# Missed Cleavages	Charge	DeltaScore	DeltaCn	Rank	Search Engine Rank	m/z [Da]	MH+ [Da]	Theo. MH+ [Da]	DeltaM [ppm]	Deltam/z [Da]	Activation Type	MS Order	Isolation Interference [%]	Ion Inject Time [ms]	RT [min]	First Scan	Spectrum File	File ID	Quan Info	Ions Score	Identity Strict	Identity Relaxed	Expectation Value	Percolator q-Value	Percolator PEP	Precursor Abundance	Apex RT [min]
		FALSE	High	Mascot (A5)	Unambiguous	[K].mAVTFIGNSTAIQELFK.[R]	N-Term(Acetyl)	1	1	P99024	P99024	0	2	0.7826	0	1	1	956.508	1912.01	1911.99	10.59	0.01013	HCD (High Energy Collision Dissociation)	MS2	32.1498	25	70.8131	53794	MS201900102_Con1.raw	F1		23	40	33	0.615292	0.004901	0.1557
FALSE	High	Master Protein	P63017	Heat shock cognate 71 kDa protein OS=Mus musculus OX=10090 GN=Hspa8 PE=1 SV=1	0	75.742	35	20	35	17	1	646	70.8	5.52	1002	20	cell organization and biogenesis;metabolic process;regulation of biological process;transport	cell surface;cytoplasm;cytosol;endosome;membrane;nucleus;spliceosomal complex;vacuole	catalytic activity;nucleotide binding;protein binding;RNA binding	Pf00012, Pf02463, Pf06723	15481	ENSMUSG00000015656.17	Hspa8	9	Exercise-induced Circadian Regulation; Exercise-induced Circadian Regulation; MAPK signaling pathway	Endocytosis; MAPK signaling pathway; Toxoplasmosis; Epstein-Barr virus infection; Spliceosome; Legionellosis; Influenza A; Antigen processing and presentation; Protein processing in endoplasmic reticulum; Estrogen signaling pathway; Measles; Longevity regulating pathway - multiple species	3	100	High
	Checked	Confidence	Annotated Sequence	Modifications	Modifications in Master Proteins	Qvality PEP	Qvality q-value	# Protein Groups	# Proteins	# PSMs	Master Protein Accessions	Positions in Master Proteins	# Missed Cleavages	Theo. MH+ [Da]	# Razor Quan Results	Abundances (Scaled): F1: Sample	Quan Info	Found in Sample: [S1] F1: Sample	Confidence (by Search Engine): Mascot	Percolator q-Value (by Search Engine): Mascot	Percolator PEP (by Search Engine): Mascot	Ions Score (by Search Engine): Mascot	Top Apex RT [min]	Sequence in Protein	Positions in Protein	Peptide Group Modifications in Protein	Quan Usage
	FALSE	High	[K].SFYPEEVSSMVLTK.[M]			0.00207413	0	1	1	2	P63017	P63017 [113-126]	0	1616.79	0	100		High	High	0.0004707	0.002703	45	46.93	K.SFYPEEVSSMVLTK.M	[113-126]		Used
		Checked	Confidence	Identifying Node	PSM Ambiguity	Annotated Sequence	Modifications	# Protein Groups	# Proteins	Master Protein Accessions	Protein Accessions	# Missed Cleavages	Charge	DeltaScore	DeltaCn	Rank	Search Engine Rank	m/z [Da]	MH+ [Da]	Theo. MH+ [Da]	DeltaM [ppm]	Deltam/z [Da]	Activation Type	MS Order	Isolation Interference [%]	Ion Inject Time [ms]	RT [min]	First Scan	Spectrum File	File ID	Quan Info	Ions Score	Identity Strict	Identity Relaxed	Expectation Value	Percolator q-Value	Percolator PEP	Precursor Abundance	Apex RT [min]
		FALSE	High	Mascot (A5)	Unambiguous	[K].SFYPEEVSSMVLTK.[M]		1	1	P63017	P63017	0	2	1	0	1	1	808.902	1616.8	1616.79	6.05	0.00489	HCD (High Energy Collision Dissociation)	MS2	63.8607	22.835	46.5859	32388	MS201900102_Con1.raw	F1		36	42	35	0.0446814	0	0.001617	6805043	46.93
		FALSE	High	Mascot (A5)	Unambiguous	[K].SFYPEEVSSMVLTK.[M]		1	1	P63017	P63017	0	2	1	0	1	1	808.903	1616.8	1616.79	7.25	0.00586	HCD (High Energy Collision Dissociation)	MS2	0	25	47.0477	32913	MS201900102_Con1.raw	F1		45	43	36	0.00678911	0.0004707	0.002703	6805043	46.93
	FALSE	High	[K].HWPFMVVNDAGRPK.[V]			0.00160321	0	1	1	1	P63017	P63017 [89-102]	0	1653.83	0		No Quan Values	High	High	0	0.001238	56		K.HWPFMVVNDAGRPK.V	[89-102]		Not Used
		Checked	Confidence	Identifying Node	PSM Ambiguity	Annotated Sequence	Modifications	# Protein Groups	# Proteins	Master Protein Accessions	Protein Accessions	# Missed Cleavages	Charge	DeltaScore	DeltaCn	Rank	Search Engine Rank	m/z [Da]	MH+ [Da]	Theo. MH+ [Da]	DeltaM [ppm]	Deltam/z [Da]	Activation Type	MS Order	Isolation Interference [%]	Ion Inject Time [ms]	RT [min]	First Scan	Spectrum File	File ID	Quan Info	Ions Score	Identity Strict	Identity Relaxed	Expectation Value	Percolator q-Value	Percolator PEP	Precursor Abundance	Apex RT [min]
		FALSE	High	Mascot (A5)	Unambiguous	[K].HWPFMVVNDAGRPK.[V]		1	1	P63017	P63017	0	3	1	0	1	1	551.954	1653.85	1653.83	9.51	0.00524	HCD (High Energy Collision Dissociation)	MS2	45.4721	25	30.5792	15615	MS201900102_Con1.raw	F1		56	42	35	0.000436181	0	0.001238	1.07302e+06	30.53
	FALSE	High	[K].SINPDEAVAYGAAVQAAILSGDK.[S]			0.000103551	0	1	1	2	P63017	P63017 [362-384]	0	2260.15	0	100		High	High	0	7.323e-05	59	67.2	K.SINPDEAVAYGAAVQAAILSGDK.S	[362-384]		Used
		Checked	Confidence	Identifying Node	PSM Ambiguity	Annotated Sequence	Modifications	# Protein Groups	# Proteins	Master Protein Accessions	Protein Accessions	# Missed Cleavages	Charge	DeltaScore	DeltaCn	Rank	Search Engine Rank	m/z [Da]	MH+ [Da]	Theo. MH+ [Da]	DeltaM [ppm]	Deltam/z [Da]	Activation Type	MS Order	Isolation Interference [%]	Ion Inject Time [ms]	RT [min]	First Scan	Spectrum File	File ID	Quan Info	Ions Score	Identity Strict	Identity Relaxed	Expectation Value	Percolator q-Value	Percolator PEP	Precursor Abundance	Apex RT [min]
		FALSE	High	Mascot (A5)	Unambiguous	[K].SINPDEAVAYGAAVQAAILSGDK.[S]		1	1	P63017	P63017	0	2	1	0	1	1	1130.59	2260.17	2260.15	9.72	0.01098	HCD (High Energy Collision Dissociation)	MS2	34.6549	25	67.063	49712	MS201900102_Con1.raw	F1		59	42	35	0.000205245	0	7.323e-05
		FALSE	High	Mascot (A5)	Unambiguous	[K].SINPDEAVAYGAAVQAAILSGDK.[S]		1	1	P63017	P63017	0	3	1	0	1	1	754.058	2260.16	2260.15	6.04	0.00455	HCD (High Energy Collision Dissociation)	MS2	0	25	67.0415	49688	MS201900102_Con1.raw	F1		57	42	35	0.000415135	0	0.0002019	1.59468e+06	67.2
	FALSE	High	[K].STAGDTHLGGEDFDNR.[M]			6.39083e-09	0	1	2	1	P63017	P63017 [221-236]	0	1691.73	0	100		High	High	0	3.257e-09	83	18.28	K.STAGDTHLGGEDFDNR.M	[221-236]		Used
		Checked	Confidence	Identifying Node	PSM Ambiguity	Annotated Sequence	Modifications	# Protein Groups	# Proteins	Master Protein Accessions	Protein Accessions	# Missed Cleavages	Charge	DeltaScore	DeltaCn	Rank	Search Engine Rank	m/z [Da]	MH+ [Da]	Theo. MH+ [Da]	DeltaM [ppm]	Deltam/z [Da]	Activation Type	MS Order	Isolation Interference [%]	Ion Inject Time [ms]	RT [min]	First Scan	Spectrum File	File ID	Quan Info	Ions Score	Identity Strict	Identity Relaxed	Expectation Value	Percolator q-Value	Percolator PEP	Precursor Abundance	Apex RT [min]
		FALSE	High	Mascot (A5)	Unambiguous	[K].STAGDTHLGGEDFDNR.[M]		1	2	P63017	P63017; P17156	0	2	0.9277	0	1	1	846.372	1691.74	1691.73	6.67	0.00564	HCD (High Energy Collision Dissociation)	MS2	0	25	18.1851	7427	MS201900102_Con1.raw	F1		83	43	36	1.04702e-06	0	3.257e-09	10917568	18.28
	FALSE	High	[R].IINEPTAAAIAYGLDK.[RKG]			0.000209516	0	3	4	2	P20029; P63017; P16627	P20029 [199-214]; P63017 [172-187]; P16627 [174-189]	0	1659.9	0	100	Shared	High	High	0	0.0001511	101	43.03	R.IINEPTAAAIAYGLDK.K	[172-187]		Used
		Checked	Confidence	Identifying Node	PSM Ambiguity	Annotated Sequence	Modifications	# Protein Groups	# Proteins	Master Protein Accessions	Protein Accessions	# Missed Cleavages	Charge	DeltaScore	DeltaCn	Rank	Search Engine Rank	m/z [Da]	MH+ [Da]	Theo. MH+ [Da]	DeltaM [ppm]	Deltam/z [Da]	Activation Type	MS Order	Isolation Interference [%]	Ion Inject Time [ms]	RT [min]	First Scan	Spectrum File	File ID	Quan Info	Ions Score	Identity Strict	Identity Relaxed	Expectation Value	Percolator q-Value	Percolator PEP	Precursor Abundance	Apex RT [min]
		FALSE	High	Mascot (A5)	Unambiguous	[R].IINEPTAAAIAYGLDK.[RKG]		3	4	P20029; P63017; P16627	P20029; P63017; P16627; P17156	0	2	1	0	1	1	830.46	1659.91	1659.9	10.8	0.00896	HCD (High Energy Collision Dissociation)	MS2	0	25	42.8411	28164	MS201900102_Con1.raw	F1		101	39	32	6.61391e-09	0	0.0001511	5.71798e+06	43.03
		FALSE	High	Mascot (A5)	Unambiguous	[R].IINEPTAAAIAYGLDK.[RKG]		3	4	P20029; P63017; P16627	P20029; P63017; P16627; P17156	0	2	0.7381	0	1	1	830.46	1659.91	1659.9	10.06	0.00835	HCD (High Energy Collision Dissociation)	MS2	25.0889	25	43.2901	28679	MS201900102_Con1.raw	F1		42	39	32	0.00497284	0.0004707	0.001717	5.71798e+06	43.03
	FALSE	High	[K].NQVAMNPTNTVFDAK.[R]	1xOxidation [M5]		2.48731e-06	0	1	1	2	P63017	P63017 [57-71]	0	1665.79	0		No Quan Values	High	High	0	1.544e-06	87		K.NQVAMNPTNTVFDAK.R	[57-71]		Not Used
		Checked	Confidence	Identifying Node	PSM Ambiguity	Annotated Sequence	Modifications	# Protein Groups	# Proteins	Master Protein Accessions	Protein Accessions	# Missed Cleavages	Charge	DeltaScore	DeltaCn	Rank	Search Engine Rank	m/z [Da]	MH+ [Da]	Theo. MH+ [Da]	DeltaM [ppm]	Deltam/z [Da]	Activation Type	MS Order	Isolation Interference [%]	Ion Inject Time [ms]	RT [min]	First Scan	Spectrum File	File ID	Quan Info	Ions Score	Identity Strict	Identity Relaxed	Expectation Value	Percolator q-Value	Percolator PEP	Precursor Abundance	Apex RT [min]
		FALSE	High	Mascot (A5)	Unambiguous	[K].NQVAmNPTNTVFDAK.[R]	M5(Oxidation)	1	1	P63017	P63017	0	2	1	0	1	1	833.404	1665.8	1665.79	5.93	0.00494	HCD (High Energy Collision Dissociation)	MS2	0	18.961	24.3148	11202	MS201900102_Con1.raw	F1		73	43	36	1.04578e-05	0	0.0008187	7.52486e+06	24.32
		FALSE	High	Mascot (A5)	Unambiguous	[K].NQVAmNPTNTVFDAK.[R]	M5(Oxidation)	1	1	P63017	P63017	0	2	0.954	0	1	1	833.405	1665.8	1665.79	7.1	0.00592	HCD (High Energy Collision Dissociation)	MS2	0	21.493	24.256	11166	MS201900102_Con1.raw	F1		87	43	36	4.7147e-07	0	1.544e-06	7.52486e+06	24.32
	FALSE	High	[K].NQVAMNPTNTVFDAK.[R]			0.000100864	0	1	1	1	P63017	P63017 [57-71]	0	1649.8	0	100		High	High	0	7.116e-05	68	30.62	K.NQVAMNPTNTVFDAK.R	[57-71]		Used
		Checked	Confidence	Identifying Node	PSM Ambiguity	Annotated Sequence	Modifications	# Protein Groups	# Proteins	Master Protein Accessions	Protein Accessions	# Missed Cleavages	Charge	DeltaScore	DeltaCn	Rank	Search Engine Rank	m/z [Da]	MH+ [Da]	Theo. MH+ [Da]	DeltaM [ppm]	Deltam/z [Da]	Activation Type	MS Order	Isolation Interference [%]	Ion Inject Time [ms]	RT [min]	First Scan	Spectrum File	File ID	Quan Info	Ions Score	Identity Strict	Identity Relaxed	Expectation Value	Percolator q-Value	Percolator PEP	Precursor Abundance	Apex RT [min]
		FALSE	High	Mascot (A5)	Unambiguous	[K].NQVAMNPTNTVFDAK.[R]		1	1	P63017	P63017	0	2	1	0	1	1	825.408	1649.81	1649.8	8.16	0.00673	HCD (High Energy Collision Dissociation)	MS2	0	24.606	30.4862	15531	MS201900102_Con1.raw	F1		68	43	36	3.05132e-05	0	7.116e-05	9875705	30.62
	FALSE	High	[K].DAGTIAGLNVLR.[I]			0.000423903	0	1	1	2	P63017	P63017 [160-171]	0	1199.67	0	100		High	High	0	0.000313	44	41	K.DAGTIAGLNVLR.I	[160-171]		Used
		Checked	Confidence	Identifying Node	PSM Ambiguity	Annotated Sequence	Modifications	# Protein Groups	# Proteins	Master Protein Accessions	Protein Accessions	# Missed Cleavages	Charge	DeltaScore	DeltaCn	Rank	Search Engine Rank	m/z [Da]	MH+ [Da]	Theo. MH+ [Da]	DeltaM [ppm]	Deltam/z [Da]	Activation Type	MS Order	Isolation Interference [%]	Ion Inject Time [ms]	RT [min]	First Scan	Spectrum File	File ID	Quan Info	Ions Score	Identity Strict	Identity Relaxed	Expectation Value	Percolator q-Value	Percolator PEP	Precursor Abundance	Apex RT [min]
		FALSE	High	Mascot (A5)	Unambiguous	[K].DAGTIAGLNVLR.[I]		1	1	P63017	P63017	0	2	1	0	1	1	600.345	1199.68	1199.67	7.51	0.00451	HCD (High Energy Collision Dissociation)	MS2	28.9894	17.691	40.7394	25725	MS201900102_Con1.raw	F1		44	39	32	0.00335244	0	0.000313	12141755	41
		FALSE	High	Mascot (A5)	Unambiguous	[K].DAGTIAGLNVLR.[I]		1	1	P63017	P63017	0	2	1	0	1	1	600.345	1199.68	1199.67	6.7	0.00402	HCD (High Energy Collision Dissociation)	MS2	0	25	41.1881	26232	MS201900102_Con1.raw	F1		41	38	31	0.00604958	0.0004707	0.006603	12141755	41
	FALSE	High	[K].TVTNAVVTVPAYFNDSQR.[Q]			1.12417e-06	0	1	1	2	P63017	P63017 [138-155]	0	1982	0	100		High	High	0	6.82e-07	78	41.24	K.TVTNAVVTVPAYFNDSQR.Q	[138-155]		Used
		Checked	Confidence	Identifying Node	PSM Ambiguity	Annotated Sequence	Modifications	# Protein Groups	# Proteins	Master Protein Accessions	Protein Accessions	# Missed Cleavages	Charge	DeltaScore	DeltaCn	Rank	Search Engine Rank	m/z [Da]	MH+ [Da]	Theo. MH+ [Da]	DeltaM [ppm]	Deltam/z [Da]	Activation Type	MS Order	Isolation Interference [%]	Ion Inject Time [ms]	RT [min]	First Scan	Spectrum File	File ID	Quan Info	Ions Score	Identity Strict	Identity Relaxed	Expectation Value	Percolator q-Value	Percolator PEP	Precursor Abundance	Apex RT [min]
		FALSE	High	Mascot (A5)	Unambiguous	[K].TVTNAVVTVPAYFNDSQR.[Q]		1	1	P63017	P63017	0	2	1	0	1	1	991.51	1982.01	1982	7.8	0.00773	HCD (High Energy Collision Dissociation)	MS2	0	23.813	41.3171	26354	MS201900102_Con1.raw	F1		78	42	35	2.776e-06	0	6.82e-07	5.28231e+06	41.24
		FALSE	High	Mascot (A5)	Unambiguous	[K].TVTNAVVTVPAYFNDSQR.[Q]		1	1	P63017	P63017	0	2	1	0	1	1	991.511	1982.02	1982	8.72	0.00864	HCD (High Energy Collision Dissociation)	MS2	66.3353	25	40.8827	25894	MS201900102_Con1.raw	F1		21	42	35	1.36078	0.0004707	0.02887	5.28231e+06	41.24
	FALSE	High	[R].FEELNADLFR.[G]			0.00152111	0	1	2	1	P63017	P63017 [302-311]	0	1253.62	0	100		High	High	0	0.001176	68	43.8	R.FEELNADLFR.G	[302-311]		Used
		Checked	Confidence	Identifying Node	PSM Ambiguity	Annotated Sequence	Modifications	# Protein Groups	# Proteins	Master Protein Accessions	Protein Accessions	# Missed Cleavages	Charge	DeltaScore	DeltaCn	Rank	Search Engine Rank	m/z [Da]	MH+ [Da]	Theo. MH+ [Da]	DeltaM [ppm]	Deltam/z [Da]	Activation Type	MS Order	Isolation Interference [%]	Ion Inject Time [ms]	RT [min]	First Scan	Spectrum File	File ID	Quan Info	Ions Score	Identity Strict	Identity Relaxed	Expectation Value	Percolator q-Value	Percolator PEP	Precursor Abundance	Apex RT [min]
		FALSE	High	Mascot (A5)	Unambiguous	[R].FEELNADLFR.[G]		1	2	P63017	P63017; P17156	0	2	1	0	1	1	627.318	1253.63	1253.62	9.69	0.00607	HCD (High Energy Collision Dissociation)	MS2	63.7285	25	43.7008	29167	MS201900102_Con1.raw	F1		68	41	34	2.14691e-05	0	0.001176	3323597	43.8
	FALSE	High	[R].TTPSYVAFTDTER.[L]			0.000978077	0	3	5	2	P63017; P16627; P17879	P63017 [37-49]; P16627 [39-51]; P17879 [37-49]	0	1487.7	0	100	Shared	High	High	0	0.0009685	63	30.35	R.TTPSYVAFTDTER.L	[37-49]		Used
		Checked	Confidence	Identifying Node	PSM Ambiguity	Annotated Sequence	Modifications	# Protein Groups	# Proteins	Master Protein Accessions	Protein Accessions	# Missed Cleavages	Charge	DeltaScore	DeltaCn	Rank	Search Engine Rank	m/z [Da]	MH+ [Da]	Theo. MH+ [Da]	DeltaM [ppm]	Deltam/z [Da]	Activation Type	MS Order	Isolation Interference [%]	Ion Inject Time [ms]	RT [min]	First Scan	Spectrum File	File ID	Quan Info	Ions Score	Identity Strict	Identity Relaxed	Expectation Value	Percolator q-Value	Percolator PEP	Precursor Abundance	Apex RT [min]
		FALSE	High	Mascot (A5)	Unambiguous	[R].TTPSYVAFTDTER.[L]		3	5	P63017; P16627; P17879	Q61696; P63017; P16627; P17879; P17156	0	2	0.9375	0	1	1	744.362	1487.72	1487.7	10.39	0.00773	HCD (High Energy Collision Dissociation)	MS2	0	9.654	30.5499	15589	MS201900102_Con1.raw	F1		48	42	35	0.00275492	0	0.0007459	37045048	30.35
		FALSE	High	Mascot (A5)	Unambiguous	[R].TTPSYVAFTDTER.[L]		3	5	P63017; P16627; P17879	Q61696; P63017; P16627; P17879; P17156	0	2	0.8254	0	1	1	744.36	1487.71	1487.7	7.35	0.00547	HCD (High Energy Collision Dissociation)	MS2	0	25	30.1312	15226	MS201900102_Con1.raw	F1		63	42	35	9.0799e-05	0	0.0009685	37045048	30.35
	FALSE	High	[RK].VEIIANDQGNR.[IT]			0.00142812	0	4	6	3	P20029; P63017; P16627; P17879	P20029 [51-61]; P63017 [26-36]; P16627 [28-38]; P17879 [26-36]	0	1228.63	0	100	Shared	High	High	0.0004707	0.00253	61	17.22	K.VEIIANDQGNR.T	[26-36]		Used
		Checked	Confidence	Identifying Node	PSM Ambiguity	Annotated Sequence	Modifications	# Protein Groups	# Proteins	Master Protein Accessions	Protein Accessions	# Missed Cleavages	Charge	DeltaScore	DeltaCn	Rank	Search Engine Rank	m/z [Da]	MH+ [Da]	Theo. MH+ [Da]	DeltaM [ppm]	Deltam/z [Da]	Activation Type	MS Order	Isolation Interference [%]	Ion Inject Time [ms]	RT [min]	First Scan	Spectrum File	File ID	Quan Info	Ions Score	Identity Strict	Identity Relaxed	Expectation Value	Percolator q-Value	Percolator PEP	Precursor Abundance	Apex RT [min]
		FALSE	High	Mascot (A5)	Unambiguous	[RK].VEIIANDQGNR.[IT]		4	6	P20029; P63017; P16627; P17879	P20029; Q61696; P63017; P16627; P17879; P17156	0	2	0.78	0	1	1	614.823	1228.64	1228.63	8	0.00491	HCD (High Energy Collision Dissociation)	MS2	33.899	25	17.7137	6891	MS201900102_Con1.raw	F1		50	40	33	0.00122979	0	0.001098	57952084	17.22
		FALSE	High	Mascot (A5)	Unambiguous	[RK].VEIIANDQGNR.[IT]		4	6	P20029; P63017; P16627; P17879	P20029; Q61696; P63017; P16627; P17879; P17156	0	2	0.8525	0	1	1	614.823	1228.64	1228.63	9.29	0.00571	HCD (High Energy Collision Dissociation)	MS2	8.45535	6.838	17.1343	6343	MS201900102_Con1.raw	F1		61	40	33	8.08389e-05	0.0004707	0.00253	57952084	17.22
		FALSE	High	Mascot (A5)	Unambiguous	[RK].VEIIANDQGNR.[IT]		4	6	P20029; P63017; P16627; P17879	P20029; Q61696; P63017; P16627; P17879; P17156	0	2	1	0	1	1	614.825	1228.64	1228.63	11.47	0.00705	HCD (High Energy Collision Dissociation)	MS2	59.1781	5.502	17.0937	6316	MS201900102_Con1.raw	F1		10	40	33	12.3179	0.004582	0.1525	57952084	17.22
	FALSE	High	[R].MVNHFIAEFK.[R]			0.00460992	0.000581891	1	1	1	P63017	P63017 [237-246]	0	1235.62	0		No Quan Values	High	High	0.0004707	0.003696	25		R.MVNHFIAEFK.R	[237-246]		Not Used
		Checked	Confidence	Identifying Node	PSM Ambiguity	Annotated Sequence	Modifications	# Protein Groups	# Proteins	Master Protein Accessions	Protein Accessions	# Missed Cleavages	Charge	DeltaScore	DeltaCn	Rank	Search Engine Rank	m/z [Da]	MH+ [Da]	Theo. MH+ [Da]	DeltaM [ppm]	Deltam/z [Da]	Activation Type	MS Order	Isolation Interference [%]	Ion Inject Time [ms]	RT [min]	First Scan	Spectrum File	File ID	Quan Info	Ions Score	Identity Strict	Identity Relaxed	Expectation Value	Percolator q-Value	Percolator PEP	Precursor Abundance	Apex RT [min]
		FALSE	High	Mascot (A5)	Unambiguous	[R].MVNHFIAEFK.[R]		1	1	P63017	P63017	0	2	0.84	0	1	1	618.319	1235.63	1235.62	5.87	0.00363	HCD (High Energy Collision Dissociation)	MS2	63.9014	15.342	28.497	13834	MS201900102_Con1.raw	F1		25	41	34	0.387634	0.0004707	0.003696	7.54716e+06	28.55
	FALSE	High	[K].SFYPEEVSSMVLTK.[M]	1xOxidation [M10]		0.00298058	0.000581891	1	1	2	P63017	P63017 [113-126]	0	1632.78	0	100		High	High	0.0004707	0.002355	36	38.32	K.SFYPEEVSSMVLTK.M	[113-126]		Used
		Checked	Confidence	Identifying Node	PSM Ambiguity	Annotated Sequence	Modifications	# Protein Groups	# Proteins	Master Protein Accessions	Protein Accessions	# Missed Cleavages	Charge	DeltaScore	DeltaCn	Rank	Search Engine Rank	m/z [Da]	MH+ [Da]	Theo. MH+ [Da]	DeltaM [ppm]	Deltam/z [Da]	Activation Type	MS Order	Isolation Interference [%]	Ion Inject Time [ms]	RT [min]	First Scan	Spectrum File	File ID	Quan Info	Ions Score	Identity Strict	Identity Relaxed	Expectation Value	Percolator q-Value	Percolator PEP	Precursor Abundance	Apex RT [min]
		FALSE	High	Mascot (A5)	Unambiguous	[K].SFYPEEVSSmVLTK.[M]	M10(Oxidation)	1	1	P63017	P63017	0	2	1	0	1	1	816.899	1632.79	1632.78	5.29	0.00432	HCD (High Energy Collision Dissociation)	MS2	71.8524	21.963	38.921	23546	MS201900102_Con1.raw	F1		36	43	36	0.0545021	0.0004707	0.002355	668559	38.93
		FALSE	High	Mascot (A5)	Unambiguous	[K].SFYPEEVSSmVLTK.[M]	M10(Oxidation)	1	1	P63017	P63017	0	2	1	0	1	1	816.903	1632.8	1632.78	9.77	0.00798	HCD (High Energy Collision Dissociation)	MS2	36.6252	25	38.1763	22713	MS201900102_Con1.raw	F1		34	43	36	0.0770843	0.0004707	0.03433	882325	38.32
	FALSE	High	[K].NSLESYAFNMK.[A]			0.00262745	0.000581891	1	1	2	P63017	P63017 [540-550]	0	1303.6	0	100		High	High	0.0004707	0.002127	57	36.15	K.NSLESYAFNMK.A	[540-550]		Used
		Checked	Confidence	Identifying Node	PSM Ambiguity	Annotated Sequence	Modifications	# Protein Groups	# Proteins	Master Protein Accessions	Protein Accessions	# Missed Cleavages	Charge	DeltaScore	DeltaCn	Rank	Search Engine Rank	m/z [Da]	MH+ [Da]	Theo. MH+ [Da]	DeltaM [ppm]	Deltam/z [Da]	Activation Type	MS Order	Isolation Interference [%]	Ion Inject Time [ms]	RT [min]	First Scan	Spectrum File	File ID	Quan Info	Ions Score	Identity Strict	Identity Relaxed	Expectation Value	Percolator q-Value	Percolator PEP	Precursor Abundance	Apex RT [min]
		FALSE	High	Mascot (A5)	Unambiguous	[K].NSLESYAFNMK.[A]		1	1	P63017	P63017	0	2	1	0	1	1	652.309	1303.61	1303.6	9.81	0.00639	HCD (High Energy Collision Dissociation)	MS2		19.368	36.111	20307	MS201900102_Con1.raw	F1		52	41	34	0.00108674	0.0004707	0.002068	7206216	36.15
		FALSE	High	Mascot (A5)	Unambiguous	[K].NSLESYAFNMK.[A]		1	1	P63017	P63017	0	2	1	0	1	1	652.309	1303.61	1303.6	8.59	0.0056	HCD (High Energy Collision Dissociation)	MS2	54.038	15.968	36.0693	20260	MS201900102_Con1.raw	F1		57	41	34	0.000337327	0.0004707	0.002127	7206216	36.15
	FALSE	High	[R].FDDAVVQSDMK.[H]	1xOxidation [M10]		0.0027116	0.000581891	1	1	1	P63017	P63017 [78-88]	0	1270.56	0	100		High	High	0.0004707	0.002133	20	18.66	R.FDDAVVQSDMK.H	[78-88]		Used
		Checked	Confidence	Identifying Node	PSM Ambiguity	Annotated Sequence	Modifications	# Protein Groups	# Proteins	Master Protein Accessions	Protein Accessions	# Missed Cleavages	Charge	DeltaScore	DeltaCn	Rank	Search Engine Rank	m/z [Da]	MH+ [Da]	Theo. MH+ [Da]	DeltaM [ppm]	Deltam/z [Da]	Activation Type	MS Order	Isolation Interference [%]	Ion Inject Time [ms]	RT [min]	First Scan	Spectrum File	File ID	Quan Info	Ions Score	Identity Strict	Identity Relaxed	Expectation Value	Percolator q-Value	Percolator PEP	Precursor Abundance	Apex RT [min]
		FALSE	High	Mascot (A5)	Unambiguous	[R].FDDAVVQSDmK.[H]	M10(Oxidation)	1	1	P63017	P63017	0	2	1	0	1	1	635.79	1270.57	1270.56	7.83	0.00498	HCD (High Energy Collision Dissociation)	MS2	88.5781	20.404	18.6568	7960	MS201900102_Con1.raw	F1		20	41	34	1.40336	0.0004707	0.002133	878427	18.66
	FALSE	High	[R].ARFEELNADLFR.[G]			0.00410671	0.000581891	1	2	1	P63017	P63017 [300-311]	1	1480.75	0	100		High	High	0.0004707	0.003281	41	37.79	R.ARFEELNADLFR.G	[300-311]		Used
		Checked	Confidence	Identifying Node	PSM Ambiguity	Annotated Sequence	Modifications	# Protein Groups	# Proteins	Master Protein Accessions	Protein Accessions	# Missed Cleavages	Charge	DeltaScore	DeltaCn	Rank	Search Engine Rank	m/z [Da]	MH+ [Da]	Theo. MH+ [Da]	DeltaM [ppm]	Deltam/z [Da]	Activation Type	MS Order	Isolation Interference [%]	Ion Inject Time [ms]	RT [min]	First Scan	Spectrum File	File ID	Quan Info	Ions Score	Identity Strict	Identity Relaxed	Expectation Value	Percolator q-Value	Percolator PEP	Precursor Abundance	Apex RT [min]
		FALSE	High	Mascot (A5)	Unambiguous	[R].ARFEELNADLFR.[G]		1	2	P63017	P63017; P17156	1	2	0.8293	0	1	1	740.89	1480.77	1480.75	12.13	0.00898	HCD (High Energy Collision Dissociation)	MS2		25	37.6443	22075	MS201900102_Con1.raw	F1		41	40	33	0.0109427	0.0004707	0.003281	5273002	37.79
	FALSE	High	[R].IINEPTAAAIAYGLDKK.[VG]			0.00759379	0.000581891	1	2	2	P63017	P63017 [172-188]	1	1787.99	0	100		High	High	0.0004707	0.006193	20	36.09	R.IINEPTAAAIAYGLDKK.V	[172-188]		Used
		Checked	Confidence	Identifying Node	PSM Ambiguity	Annotated Sequence	Modifications	# Protein Groups	# Proteins	Master Protein Accessions	Protein Accessions	# Missed Cleavages	Charge	DeltaScore	DeltaCn	Rank	Search Engine Rank	m/z [Da]	MH+ [Da]	Theo. MH+ [Da]	DeltaM [ppm]	Deltam/z [Da]	Activation Type	MS Order	Isolation Interference [%]	Ion Inject Time [ms]	RT [min]	First Scan	Spectrum File	File ID	Quan Info	Ions Score	Identity Strict	Identity Relaxed	Expectation Value	Percolator q-Value	Percolator PEP	Precursor Abundance	Apex RT [min]
		FALSE	High	Mascot (A5)	Unambiguous	[R].IINEPTAAAIAYGLDKK.[VG]		1	2	P63017	P63017; P17156	1	3	1	0	1	1	596.674	1788.01	1787.99	8.86	0.00528	HCD (High Energy Collision Dissociation)	MS2	90.4749	4.981	35.9118	20097	MS201900102_Con1.raw	F1		7	36	29	9.57152	0.0004707	0.02032	9463427	36.09
		FALSE	High	Mascot (A5)	Unambiguous	[R].IINEPTAAAIAYGLDKK.[VG]		1	2	P63017	P63017; P17156	1	3	0.95	0	1	1	596.673	1788.01	1787.99	8.55	0.0051	HCD (High Energy Collision Dissociation)	MS2	25.139	25	36.3511	20573	MS201900102_Con1.raw	F1		20	36	29	0.39809	0.0004707	0.006193	9463427	36.09
	FALSE	High	[K].LLQDFFNGK.[E]			0.00987469	0.000581891	1	2	1	P63017	P63017 [349-357]	0	1081.57	0	100		High	High	0.0004707	0.008116	40	39.5	K.LLQDFFNGK.E	[349-357]		Used
		Checked	Confidence	Identifying Node	PSM Ambiguity	Annotated Sequence	Modifications	# Protein Groups	# Proteins	Master Protein Accessions	Protein Accessions	# Missed Cleavages	Charge	DeltaScore	DeltaCn	Rank	Search Engine Rank	m/z [Da]	MH+ [Da]	Theo. MH+ [Da]	DeltaM [ppm]	Deltam/z [Da]	Activation Type	MS Order	Isolation Interference [%]	Ion Inject Time [ms]	RT [min]	First Scan	Spectrum File	File ID	Quan Info	Ions Score	Identity Strict	Identity Relaxed	Expectation Value	Percolator q-Value	Percolator PEP	Precursor Abundance	Apex RT [min]
		FALSE	High	Mascot (A5)	Unambiguous	[K].LLQDFFNGK.[E]		1	2	P63017	P63017; P17156	0	2	0.875	0	1	1	541.291	1081.57	1081.57	6.1	0.0033	HCD (High Energy Collision Dissociation)	MS2	0	25	39.3942	24114	MS201900102_Con1.raw	F1		40	38	31	0.00791414	0.0004707	0.008116	2285588	39.5
	FALSE	High	[R].MVNHFIAEFK.[R]	1xOxidation [M1]		0.0541385	0.00154131	1	1	1	P63017	P63017 [237-246]	0	1251.62	0		No Quan Values	High	High	0.001254	0.04707	12		R.MVNHFIAEFK.R	[237-246]		Not Used
		Checked	Confidence	Identifying Node	PSM Ambiguity	Annotated Sequence	Modifications	# Protein Groups	# Proteins	Master Protein Accessions	Protein Accessions	# Missed Cleavages	Charge	DeltaScore	DeltaCn	Rank	Search Engine Rank	m/z [Da]	MH+ [Da]	Theo. MH+ [Da]	DeltaM [ppm]	Deltam/z [Da]	Activation Type	MS Order	Isolation Interference [%]	Ion Inject Time [ms]	RT [min]	First Scan	Spectrum File	File ID	Quan Info	Ions Score	Identity Strict	Identity Relaxed	Expectation Value	Percolator q-Value	Percolator PEP	Precursor Abundance	Apex RT [min]
		FALSE	High	Mascot (A5)	Unambiguous	[R].mVNHFIAEFK.[R]	M1(Oxidation)	1	1	P63017	P63017	0	3	1	0	1	1	417.881	1251.63	1251.62	7.31	0.00305	HCD (High Energy Collision Dissociation)	MS2	47.8454	25	24.4189	11278	MS201900102_Con1.raw	F1		12	41	34	10.0063	0.001254	0.04707
	FALSE	High	[K].MKEIAEAYLGK.[T]	1xOxidation [M1]		0.0941847	0.0029762	1	1	1	P63017	P63017 [127-137]	1	1268.66	0		No Quan Values	High	High	0.002413	0.08348	22		K.MKEIAEAYLGK.T	[127-137]		Not Used
		Checked	Confidence	Identifying Node	PSM Ambiguity	Annotated Sequence	Modifications	# Protein Groups	# Proteins	Master Protein Accessions	Protein Accessions	# Missed Cleavages	Charge	DeltaScore	DeltaCn	Rank	Search Engine Rank	m/z [Da]	MH+ [Da]	Theo. MH+ [Da]	DeltaM [ppm]	Deltam/z [Da]	Activation Type	MS Order	Isolation Interference [%]	Ion Inject Time [ms]	RT [min]	First Scan	Spectrum File	File ID	Quan Info	Ions Score	Identity Strict	Identity Relaxed	Expectation Value	Percolator q-Value	Percolator PEP	Precursor Abundance	Apex RT [min]
		FALSE	High	Mascot (A5)	Unambiguous	[K].mKEIAEAYLGK.[T]	M1(Oxidation)	1	1	P63017	P63017	1	3	1	0	1	1	423.56	1268.66	1268.66	7.26	0.00307	HCD (High Energy Collision Dissociation)	MS2	0	25	18.601	7894	MS201900102_Con1.raw	F1		22	40	33	0.658364	0.002413	0.08348
	FALSE	High	[K].EIAEAYLGK.[T]			0.124862	0.00390307	1	1	1	P63017	P63017 [129-137]	0	993.525	0		No Quan Values	High	High	0.003159	0.1115	11		K.EIAEAYLGK.T	[129-137]		Not Used
		Checked	Confidence	Identifying Node	PSM Ambiguity	Annotated Sequence	Modifications	# Protein Groups	# Proteins	Master Protein Accessions	Protein Accessions	# Missed Cleavages	Charge	DeltaScore	DeltaCn	Rank	Search Engine Rank	m/z [Da]	MH+ [Da]	Theo. MH+ [Da]	DeltaM [ppm]	Deltam/z [Da]	Activation Type	MS Order	Isolation Interference [%]	Ion Inject Time [ms]	RT [min]	First Scan	Spectrum File	File ID	Quan Info	Ions Score	Identity Strict	Identity Relaxed	Expectation Value	Percolator q-Value	Percolator PEP	Precursor Abundance	Apex RT [min]
		FALSE	High	Mascot (A5)	Unambiguous	[K].EIAEAYLGK.[T]		1	1	P63017	P63017	0	2	1	0	1	1	497.27	993.533	993.525	7.98	0.00396	HCD (High Energy Collision Dissociation)	MS2	67.3379	10.129	23.7191	10839	MS201900102_Con1.raw	F1		11	38	31	5.64845	0.003159	0.1115
	FALSE	High	[K].FELTGIPPAPR.[G]			0.217786	0.00963357	1	1	1	P63017	P63017 [459-469]	0	1197.66	0		No Quan Values	High	High	0.008502	0.1986	8	36.7	K.FELTGIPPAPR.G	[459-469]		Not Used
		Checked	Confidence	Identifying Node	PSM Ambiguity	Annotated Sequence	Modifications	# Protein Groups	# Proteins	Master Protein Accessions	Protein Accessions	# Missed Cleavages	Charge	DeltaScore	DeltaCn	Rank	Search Engine Rank	m/z [Da]	MH+ [Da]	Theo. MH+ [Da]	DeltaM [ppm]	Deltam/z [Da]	Activation Type	MS Order	Isolation Interference [%]	Ion Inject Time [ms]	RT [min]	First Scan	Spectrum File	File ID	Quan Info	Ions Score	Identity Strict	Identity Relaxed	Expectation Value	Percolator q-Value	Percolator PEP	Precursor Abundance	Apex RT [min]
		FALSE	High	Mascot (A5)	Unambiguous	[K].FELTGIPPAPR.[G]		1	1	P63017	P63017	0	2	1	0	1	1	599.341	1197.68	1197.66	10.71	0.00641	HCD (High Energy Collision Dissociation)	MS2	0	25	37.3234	21692	MS201900102_Con1.raw	F1		8	37	30	8.5588	0.008502	0.1986	3.33721e+06	36.7
FALSE	High	Master Protein	P63260	Actin, cytoplasmic 2 OS=Mus musculus OX=10090 GN=Actg1 PE=1 SV=1	0	75.519	47	17	40	7	1	375	41.8	5.48	1401	17	cell organization and biogenesis	cytoplasm;cytoskeleton;cytosol;membrane;nucleus	nucleotide binding;protein binding;structural molecule activity	Pf00022	11465	ENSMUSG00000062825.15	Actg1	11	Regulation of Actin Cytoskeleton; Striated Muscle Contraction; Myometrial Relaxation and Contraction Pathways; Focal Adhesion	Oxytocin signaling pathway; Leukocyte transendothelial migration; Hypertrophic cardiomyopathy (HCM); Regulation of actin cytoskeleton; Arrhythmogenic right ventricular cardiomyopathy (ARVC); Focal adhesion; Hippo signaling pathway; Platelet activation; Dilated cardiomyopathy; Adherens junction; Phagosome; Proteoglycans in cancer; Salmonella infection; Thyroid hormone signaling pathway; Rap1 signa…	12	100	High
	Checked	Confidence	Annotated Sequence	Modifications	Modifications in Master Proteins	Qvality PEP	Qvality q-value	# Protein Groups	# Proteins	# PSMs	Master Protein Accessions	Positions in Master Proteins	# Missed Cleavages	Theo. MH+ [Da]	# Razor Quan Results	Abundances (Scaled): F1: Sample	Quan Info	Found in Sample: [S1] F1: Sample	Confidence (by Search Engine): Mascot	Percolator q-Value (by Search Engine): Mascot	Percolator PEP (by Search Engine): Mascot	Ions Score (by Search Engine): Mascot	Top Apex RT [min]	Sequence in Protein	Positions in Protein	Peptide Group Modifications in Protein	Quan Usage
	FALSE	High	[R].KDLYANTVLSGGTTMYPGIADR.[M]			1.82193e-07	0	1	2	1	P63260	P63260 [291-312]	1	2343.16	0	100		High	High	0	1.036e-07	99	41.17	R.KDLYANTVLSGGTTMYPGIADR.M	[291-312]		Used
		Checked	Confidence	Identifying Node	PSM Ambiguity	Annotated Sequence	Modifications	# Protein Groups	# Proteins	Master Protein Accessions	Protein Accessions	# Missed Cleavages	Charge	DeltaScore	DeltaCn	Rank	Search Engine Rank	m/z [Da]	MH+ [Da]	Theo. MH+ [Da]	DeltaM [ppm]	Deltam/z [Da]	Activation Type	MS Order	Isolation Interference [%]	Ion Inject Time [ms]	RT [min]	First Scan	Spectrum File	File ID	Quan Info	Ions Score	Identity Strict	Identity Relaxed	Expectation Value	Percolator q-Value	Percolator PEP	Precursor Abundance	Apex RT [min]
		FALSE	High	Mascot (A5)	Unambiguous	[R].KDLYANTVLSGGTTMYPGIADR.[M]		1	2	P63260	P60710; P63260	1	2	1	0	1	1	1172.09	2343.18	2343.16	5.7	0.00667	HCD (High Energy Collision Dissociation)	MS2	0	25	41.1172	26163	MS201900102_Con1.raw	F1		99	43	36	2.94152e-08	0	1.036e-07	4.60829e+06	41.17
	FALSE	High	[R].KDLYANTVLSGGTTMYPGIADR.[M]	1xOxidation [M15]		5.28193e-05	0	1	2	1	P63260	P63260 [291-312]	1	2359.16	0	100		High	High	0	3.642e-05	65	36.82	R.KDLYANTVLSGGTTMYPGIADR.M	[291-312]		Used
		Checked	Confidence	Identifying Node	PSM Ambiguity	Annotated Sequence	Modifications	# Protein Groups	# Proteins	Master Protein Accessions	Protein Accessions	# Missed Cleavages	Charge	DeltaScore	DeltaCn	Rank	Search Engine Rank	m/z [Da]	MH+ [Da]	Theo. MH+ [Da]	DeltaM [ppm]	Deltam/z [Da]	Activation Type	MS Order	Isolation Interference [%]	Ion Inject Time [ms]	RT [min]	First Scan	Spectrum File	File ID	Quan Info	Ions Score	Identity Strict	Identity Relaxed	Expectation Value	Percolator q-Value	Percolator PEP	Precursor Abundance	Apex RT [min]
		FALSE	High	Mascot (A5)	Unambiguous	[R].KDLYANTVLSGGTTmYPGIADR.[M]	M15(Oxidation)	1	2	P63260	P60710; P63260	1	3	0.9692	0	1	1	787.068	2359.19	2359.16	12.39	0.00974	HCD (High Energy Collision Dissociation)	MS2	0	25	36.6551	20918	MS201900102_Con1.raw	F1		65	43	36	7.34654e-05	0	3.642e-05	10824267	36.82
	FALSE	High	[RK].SYELPDGQVITIGNER.[F]			1.84119e-07	0	3	7	8	Q8BFZ3; P68033; P63260	Q8BFZ3 [240-255]; P68033 [241-256]; P63260 [239-254]	0	1790.89	0	100	Shared	High	High	0	1.049e-07	114	45.95	K.SYELPDGQVITIGNER.F	[239-254]		Used
		Checked	Confidence	Identifying Node	PSM Ambiguity	Annotated Sequence	Modifications	# Protein Groups	# Proteins	Master Protein Accessions	Protein Accessions	# Missed Cleavages	Charge	DeltaScore	DeltaCn	Rank	Search Engine Rank	m/z [Da]	MH+ [Da]	Theo. MH+ [Da]	DeltaM [ppm]	Deltam/z [Da]	Activation Type	MS Order	Isolation Interference [%]	Ion Inject Time [ms]	RT [min]	First Scan	Spectrum File	File ID	Quan Info	Ions Score	Identity Strict	Identity Relaxed	Expectation Value	Percolator q-Value	Percolator PEP	Precursor Abundance	Apex RT [min]
		FALSE	High	Mascot (A5)	Unambiguous	[RK].SYELPDGQVITIGNER.[F]		3	7	Q8BFZ3; P68033; P63260	Q8BFZ3; P63268; P60710; P62737; P68134; P68033; P63260	0	2	0.9823	0	1	1	895.956	1790.91	1790.89	7.55	0.00676	HCD (High Energy Collision Dissociation)	MS2	0	25	45.3788	30968	MS201900102_Con1.raw	F1		113	42	35	8.86384e-10	0	7.548e-06	125712264	45.95
		FALSE	High	Mascot (A5)	Unambiguous	[RK].SYELPDGQVITIGNER.[F]		3	7	Q8BFZ3; P68033; P63260	Q8BFZ3; P63268; P60710; P62737; P68134; P68033; P63260	0	2	1	0	1	1	895.957	1790.91	1790.89	8.17	0.00731	HCD (High Energy Collision Dissociation)	MS2	0	25	41.9679	27121	MS201900102_Con1.raw	F1		49	42	35	0.00225485	0	0.0009319	12878885	41.74
		FALSE	High	Mascot (A5)	Unambiguous	[RK].SYELPDGQVITIGNER.[F]		3	7	Q8BFZ3; P68033; P63260	Q8BFZ3; P63268; P60710; P62737; P68134; P68033; P63260	0	2	1	0	1	1	895.957	1790.91	1790.89	8.37	0.00749	HCD (High Energy Collision Dissociation)	MS2	0	7.698	46.2809	32033	MS201900102_Con1.raw	F1		83	42	35	1.05112e-06	0	5.304e-07	125712264	45.95
		FALSE	High	Mascot (A5)	Unambiguous	[RK].SYELPDGQVITIGNER.[F]		3	7	Q8BFZ3; P68033; P63260	Q8BFZ3; P63268; P60710; P62737; P68134; P68033; P63260	0	2	1	0	1	1	895.957	1790.91	1790.89	8.57	0.00768	HCD (High Energy Collision Dissociation)	MS2	4.32957	5.232	45.8555	31542	MS201900102_Con1.raw	F1		114	42	35	7.38958e-10	0	1.049e-07	125712264	45.95
		FALSE	High	Mascot (A5)	Unambiguous	[RK].SYELPDGQVITIGNER.[F]		3	7	Q8BFZ3; P68033; P63260	Q8BFZ3; P63268; P60710; P62737; P68134; P68033; P63260	0	2	1	0	1	1	895.959	1790.91	1790.89	10.96	0.00981	HCD (High Energy Collision Dissociation)	MS2	0	25	41.0533	26095	MS201900102_Con1.raw	F1		74	42	35	7.48669e-06	0	0.0004223	2085098	41.05
		FALSE	High	Mascot (A5)	Unambiguous	[RK].SYELPDGQVITIGNER.[F]		3	7	Q8BFZ3; P68033; P63260	Q8BFZ3; P63268; P60710; P62737; P68134; P68033; P63260	0	2	1	0	1	1	895.96	1790.91	1790.89	12.12	0.01085	HCD (High Energy Collision Dissociation)	MS2	4.448	25	41.5284	26598	MS201900102_Con1.raw	F1		92	42	35	1.07145e-07	0	3.827e-05	12878885	41.74
		FALSE	High	Mascot (A5)	Unambiguous	[RK].SYELPDGQVITIGNER.[F]		3	7	Q8BFZ3; P68033; P63260	Q8BFZ3; P63268; P60710; P62737; P68134; P68033; P63260	0	2	1	0	1	1	895.958	1790.91	1790.89	9.39	0.00841	HCD (High Energy Collision Dissociation)	MS2	28.0213	25	44.9241	30476	MS201900102_Con1.raw	F1		55	42	35	0.000624376	0.0004707	0.01177	3.74574e+06	45.14
		FALSE	High	Mascot (A5)	Unambiguous	[RK].SYELPDGQVITIGNER.[F]		3	7	Q8BFZ3; P68033; P63260	Q8BFZ3; P63268; P60710; P62737; P68134; P68033; P63260	0	2	1	0	1	1	895.957	1790.91	1790.89	7.76	0.00695	HCD (High Energy Collision Dissociation)	MS2	0	15.118	46.7819	32605	MS201900102_Con1.raw	F1		64	42	35	7.43619e-05	0.0004707	0.008504	125712264	45.95
	FALSE	High	[K].IWHHTFYNELR.[V]			0.00103088	0	2	4	2	P68033; P63260	P68033 [87-97]; P63260 [85-95]	0	1515.75	0	100	Shared	High	High	0	0.0007837	37	24.21	K.IWHHTFYNELR.V	[85-95]		Used
		Checked	Confidence	Identifying Node	PSM Ambiguity	Annotated Sequence	Modifications	# Protein Groups	# Proteins	Master Protein Accessions	Protein Accessions	# Missed Cleavages	Charge	DeltaScore	DeltaCn	Rank	Search Engine Rank	m/z [Da]	MH+ [Da]	Theo. MH+ [Da]	DeltaM [ppm]	Deltam/z [Da]	Activation Type	MS Order	Isolation Interference [%]	Ion Inject Time [ms]	RT [min]	First Scan	Spectrum File	File ID	Quan Info	Ions Score	Identity Strict	Identity Relaxed	Expectation Value	Percolator q-Value	Percolator PEP	Precursor Abundance	Apex RT [min]
		FALSE	High	Mascot (A5)	Unambiguous	[K].IWHHTFYNELR.[V]		2	4	P68033; P63260	P60710; P68134; P68033; P63260	0	3	1	0	1	1	505.925	1515.76	1515.75	7.06	0.00357	HCD (High Energy Collision Dissociation)	MS2	19.5429	6.454	24.1201	11079	MS201900102_Con1.raw	F1		37	42	35	0.0302057	0	0.0007837	61330216	24.21
		FALSE	High	Mascot (A5)	Unambiguous	[K].IWHHTFYNELR.[V]		2	4	P68033; P63260	P60710; P68134; P68033; P63260	0	2	1	0	1	1	758.386	1515.76	1515.75	9.77	0.0074	HCD (High Energy Collision Dissociation)	MS2	0	8.277	24.1666	11110	MS201900102_Con1.raw	F1		27	42	35	0.317529	0.0004707	0.02973	12132322	24.22
	FALSE	High	[K].QEYDESGPSIVHR.[K]			0.000439798	0	1	2	1	P63260	P63260 [360-372]	0	1516.7	0	100		High	High	0	0.0003261	66	17.81	K.QEYDESGPSIVHR.K	[360-372]		Used
		Checked	Confidence	Identifying Node	PSM Ambiguity	Annotated Sequence	Modifications	# Protein Groups	# Proteins	Master Protein Accessions	Protein Accessions	# Missed Cleavages	Charge	DeltaScore	DeltaCn	Rank	Search Engine Rank	m/z [Da]	MH+ [Da]	Theo. MH+ [Da]	DeltaM [ppm]	Deltam/z [Da]	Activation Type	MS Order	Isolation Interference [%]	Ion Inject Time [ms]	RT [min]	First Scan	Spectrum File	File ID	Quan Info	Ions Score	Identity Strict	Identity Relaxed	Expectation Value	Percolator q-Value	Percolator PEP	Precursor Abundance	Apex RT [min]
		FALSE	High	Mascot (A5)	Unambiguous	[K].QEYDESGPSIVHR.[K]		1	2	P63260	P60710; P63260	0	2	1	0	1	1	758.861	1516.71	1516.7	7.9	0.00599	HCD (High Energy Collision Dissociation)	MS2	0	23.13	18.0521	7275	MS201900102_Con1.raw	F1		66	43	36	5.45061e-05	0	0.0003261	82564616	17.81
	FALSE	High	[R].AVFPSIVGRPR.[H]			0.00156162	0	2	6	3	P68033; P63260	P68033 [31-41]; P63260 [29-39]	0	1198.71	0	100	Shared	High	High	0	0.001207	45	25.4	R.AVFPSIVGRPR.H	[29-39]		Used
		Checked	Confidence	Identifying Node	PSM Ambiguity	Annotated Sequence	Modifications	# Protein Groups	# Proteins	Master Protein Accessions	Protein Accessions	# Missed Cleavages	Charge	DeltaScore	DeltaCn	Rank	Search Engine Rank	m/z [Da]	MH+ [Da]	Theo. MH+ [Da]	DeltaM [ppm]	Deltam/z [Da]	Activation Type	MS Order	Isolation Interference [%]	Ion Inject Time [ms]	RT [min]	First Scan	Spectrum File	File ID	Quan Info	Ions Score	Identity Strict	Identity Relaxed	Expectation Value	Percolator q-Value	Percolator PEP	Precursor Abundance	Apex RT [min]
		FALSE	High	Mascot (A5)	Unambiguous	[R].AVFPSIVGRPR.[H]		2	6	P68033; P63260	P63268; P60710; P62737; P68134; P68033; P63260	0	2	0.7778	0	1	1	599.861	1198.72	1198.71	8.44	0.00506	HCD (High Energy Collision Dissociation)	MS2	0	10.644	25.7496	12105	MS201900102_Con1.raw	F1		45	35	28	0.00122144	0	0.001207	41335148	25.4
		FALSE	High	Mascot (A5)	Unambiguous	[R].AVFPSIVGRPR.[H]		2	6	P68033; P63260	P63268; P60710; P62737; P68134; P68033; P63260	0	2	0.7674	0	1	1	599.861	1198.72	1198.71	8.24	0.00494	HCD (High Energy Collision Dissociation)	MS2	19.4396	4.932	25.3303	11847	MS201900102_Con1.raw	F1		43	35	28	0.00185187	0	0.001442	41335148	25.4
		FALSE	High	Mascot (A5)	Unambiguous	[R].AVFPSIVGRPR.[H]		2	6	P68033; P63260	P63268; P60710; P62737; P68134; P68033; P63260	0	2	0.75	0	1	1	599.862	1198.72	1198.71	8.95	0.00537	HCD (High Energy Collision Dissociation)	MS2	0	19.287	24.9122	11603	MS201900102_Con1.raw	F1		36	35	28	0.0105408	0.0004707	0.004993	41335148	25.4
	FALSE	High	[K].DLYANTVLSGGTTMYPGIADR.[M]			3.47917e-07	0	1	2	2	P63260	P63260 [292-312]	0	2215.07	0	100		High	High	0	2.705e-05	79	55.42	K.DLYANTVLSGGTTMYPGIADR.M	[292-312]		Used
		Checked	Confidence	Identifying Node	PSM Ambiguity	Annotated Sequence	Modifications	# Protein Groups	# Proteins	Master Protein Accessions	Protein Accessions	# Missed Cleavages	Charge	DeltaScore	DeltaCn	Rank	Search Engine Rank	m/z [Da]	MH+ [Da]	Theo. MH+ [Da]	DeltaM [ppm]	Deltam/z [Da]	Activation Type	MS Order	Isolation Interference [%]	Ion Inject Time [ms]	RT [min]	First Scan	Spectrum File	File ID	Quan Info	Ions Score	Identity Strict	Identity Relaxed	Expectation Value	Percolator q-Value	Percolator PEP	Precursor Abundance	Apex RT [min]
		FALSE	High	Mascot (A5)	Unambiguous	[K].DLYANTVLSGGTTMYPGIADR.[M]		1	2	P63260	P60710; P63260	0	2	0.9367	0	1	1	1108.05	2215.09	2215.07	8.67	0.0096	HCD (High Energy Collision Dissociation)	MS2	0	19.034	55.7067	38559	MS201900102_Con1.raw	F1		79	44	37	3.03181e-06	0	2.705e-05	41153916	55.42
		FALSE	High	Mascot (A5)	Unambiguous	[K].DLYANTVLSGGTTMYPGIADR.[M]		1	2	P63260	P60710; P63260	0	2	1	0	1	1	1108.05	2215.09	2215.07	8.12	0.00899	HCD (High Energy Collision Dissociation)	MS2	0	5.253	55.2812	38275	MS201900102_Con1.raw	F1		78	44	37	4.17068e-06	0	2.027e-07	41153916	55.42
	FALSE	High	[K].DLYANTVLSGGTTMYPGIADR.[M]	1xOxidation [M14]		1.09855e-08	0	1	2	3	P63260	P63260 [292-312]	0	2231.06	0	100		High	High	0	9.635e-08	124	49	K.DLYANTVLSGGTTMYPGIADR.M	[292-312]		Used
		Checked	Confidence	Identifying Node	PSM Ambiguity	Annotated Sequence	Modifications	# Protein Groups	# Proteins	Master Protein Accessions	Protein Accessions	# Missed Cleavages	Charge	DeltaScore	DeltaCn	Rank	Search Engine Rank	m/z [Da]	MH+ [Da]	Theo. MH+ [Da]	DeltaM [ppm]	Deltam/z [Da]	Activation Type	MS Order	Isolation Interference [%]	Ion Inject Time [ms]	RT [min]	First Scan	Spectrum File	File ID	Quan Info	Ions Score	Identity Strict	Identity Relaxed	Expectation Value	Percolator q-Value	Percolator PEP	Precursor Abundance	Apex RT [min]
		FALSE	High	Mascot (A5)	Unambiguous	[K].DLYANTVLSGGTTmYPGIADR.[M]	M14(Oxidation)	1	2	P63260	P60710; P63260	0	2	1	0	1	1	1116.05	2231.08	2231.06	8.48	0.00946	HCD (High Energy Collision Dissociation)	MS2	12.8503	17.996	48.6543	34616	MS201900102_Con1.raw	F1		124	44	37	1.21303e-10	0	9.635e-08
		FALSE	High	Mascot (A5)	Unambiguous	[K].DLYANTVLSGGTTmYPGIADR.[M]	M14(Oxidation)	1	2	P63260	P60710; P63260	0	2	1	0	1	1	1116.04	2231.08	2231.06	7.93	0.00885	HCD (High Energy Collision Dissociation)	MS2	0	6.176	48.8867	34874	MS201900102_Con1.raw	F1		87	44	37	6.50532e-07	0	5.696e-09	16606850	49
		FALSE	High	Mascot (A5)	Unambiguous	[K].DLYANTVLSGGTTmYPGIADR.[M]	M14(Oxidation)	1	2	P63260	P60710; P63260	0	2	1	0	1	1	1116.04	2231.08	2231.06	6.18	0.00689	HCD (High Energy Collision Dissociation)	MS2	0	18.066	49.3427	35373	MS201900102_Con1.raw	F1		85	44	37	1.07501e-06	0	3.437e-07	16606850	49
	FALSE	High	[K].AGFAGDDAPR.[A]			0.00117568	0	2	6	1	P68033; P63260	P68033 [21-30]; P63260 [19-28]	0	976.448	0	100	Shared	High	High	0	0.0009019	45	15.98	K.AGFAGDDAPR.A	[19-28]		Used
		Checked	Confidence	Identifying Node	PSM Ambiguity	Annotated Sequence	Modifications	# Protein Groups	# Proteins	Master Protein Accessions	Protein Accessions	# Missed Cleavages	Charge	DeltaScore	DeltaCn	Rank	Search Engine Rank	m/z [Da]	MH+ [Da]	Theo. MH+ [Da]	DeltaM [ppm]	Deltam/z [Da]	Activation Type	MS Order	Isolation Interference [%]	Ion Inject Time [ms]	RT [min]	First Scan	Spectrum File	File ID	Quan Info	Ions Score	Identity Strict	Identity Relaxed	Expectation Value	Percolator q-Value	Percolator PEP	Precursor Abundance	Apex RT [min]
		FALSE	High	Mascot (A5)	Unambiguous	[K].AGFAGDDAPR.[A]		2	6	P68033; P63260	P63268; P60710; P62737; P68134; P68033; P63260	0	2	0.9111	0	1	1	488.731	976.455	976.448	6.94	0.00339	HCD (High Energy Collision Dissociation)	MS2	79.5452	24.569	15.9894	5755	MS201900102_Con1.raw	F1		45	39	32	0.0028949	0	0.0009019	1.10803e+06	15.98
	FALSE	High	[R].VAPEEHPVLLTEAPLNPK.[A]			1.02366e-05	0	1	2	2	P63260	P63260 [96-113]	0	1954.06	0	100		High	High	0	6.665e-06	47	31.88	R.VAPEEHPVLLTEAPLNPK.A	[96-113]		Used
		Checked	Confidence	Identifying Node	PSM Ambiguity	Annotated Sequence	Modifications	# Protein Groups	# Proteins	Master Protein Accessions	Protein Accessions	# Missed Cleavages	Charge	DeltaScore	DeltaCn	Rank	Search Engine Rank	m/z [Da]	MH+ [Da]	Theo. MH+ [Da]	DeltaM [ppm]	Deltam/z [Da]	Activation Type	MS Order	Isolation Interference [%]	Ion Inject Time [ms]	RT [min]	First Scan	Spectrum File	File ID	Quan Info	Ions Score	Identity Strict	Identity Relaxed	Expectation Value	Percolator q-Value	Percolator PEP	Precursor Abundance	Apex RT [min]
		FALSE	High	Mascot (A5)	Unambiguous	[R].VAPEEHPVLLTEAPLNPK.[A]		1	2	P63260	P60710; P63260	0	3	0.4468	0	1	1	652.033	1954.08	1954.06	9.73	0.00634	HCD (High Energy Collision Dissociation)	MS2	1.26647	0.799	31.9584	16782	MS201900102_Con1.raw	F1		47	37	30	0.00106772	0	6.665e-06	210627344	31.88
		FALSE	High	Mascot (A5)	Unambiguous	[R].VAPEEHPVLLTEAPLNPK.[A]		1	2	P63260	P60710; P63260	0	3	1	0	1	1	652.033	1954.08	1954.06	10.01	0.00652	HCD (High Energy Collision Dissociation)	MS2	77.4243	8.983	32.3874	17145	MS201900102_Con1.raw	F1		3	37	30	28.8824	0.004207	0.1416	210627344	31.88
	FALSE	High	[M].EEEIAALVIDNGSGMCK.[A]	1xAcetyl [N-Term]; 1xPropionamide [C16]	P63260 1xAcetyl [N-Term]	0.000191597	0	1	1	1	P63260	P63260 [2-18]	0	1891.88	0		No Quan Values	High	High	0	0.000138	79		M.EEEIAALVIDNGSGMCK.A	[2-18]	1xAcetyl [N-Term]	Not Used
		Checked	Confidence	Identifying Node	PSM Ambiguity	Annotated Sequence	Modifications	# Protein Groups	# Proteins	Master Protein Accessions	Protein Accessions	# Missed Cleavages	Charge	DeltaScore	DeltaCn	Rank	Search Engine Rank	m/z [Da]	MH+ [Da]	Theo. MH+ [Da]	DeltaM [ppm]	Deltam/z [Da]	Activation Type	MS Order	Isolation Interference [%]	Ion Inject Time [ms]	RT [min]	First Scan	Spectrum File	File ID	Quan Info	Ions Score	Identity Strict	Identity Relaxed	Expectation Value	Percolator q-Value	Percolator PEP	Precursor Abundance	Apex RT [min]
		FALSE	High	Mascot (A5)	Unambiguous	[M].eEEIAALVIDNGSGMcK.[A]	N-Term(Acetyl); C16(Propionamide)	1	1	P63260	P63260	0	2	0.962	0	1	1	946.451	1891.89	1891.88	8.53	0.00807	HCD (High Energy Collision Dissociation)	MS2	0	25	69.9955	52858	MS201900102_Con1.raw	F1		79	44	37	3.50873e-06	0	0.000138
	FALSE	High	[K].QEYDESGPSIVHRK.[C]			0.00319128	0.000581891	1	2	1	P63260	P63260 [360-373]	1	1644.8	0		No Quan Values	High	High	0.0004707	0.002521	29		K.QEYDESGPSIVHRK.C	[360-373]		Not Used
		Checked	Confidence	Identifying Node	PSM Ambiguity	Annotated Sequence	Modifications	# Protein Groups	# Proteins	Master Protein Accessions	Protein Accessions	# Missed Cleavages	Charge	DeltaScore	DeltaCn	Rank	Search Engine Rank	m/z [Da]	MH+ [Da]	Theo. MH+ [Da]	DeltaM [ppm]	Deltam/z [Da]	Activation Type	MS Order	Isolation Interference [%]	Ion Inject Time [ms]	RT [min]	First Scan	Spectrum File	File ID	Quan Info	Ions Score	Identity Strict	Identity Relaxed	Expectation Value	Percolator q-Value	Percolator PEP	Precursor Abundance	Apex RT [min]
		FALSE	High	Mascot (A5)	Unambiguous	[K].QEYDESGPSIVHRK.[C]		1	2	P63260	P60710; P63260	1	3	0.7586	0	1	1	548.943	1644.81	1644.8	9.66	0.0053	HCD (High Energy Collision Dissociation)	MS2	76.3243	25	15.3507	4997	MS201900102_Con1.raw	F1		29	42	35	0.231396	0.0004707	0.002521
	FALSE	High	[K].EITALAPSTMK.[I]	1xOxidation [M10]		0.0159208	0.000581891	2	6	2	P68033; P63260	P68033 [318-328]; P63260 [316-326]	0	1177.61	0	100	Shared	High	High	0.0004707	0.02385	40	19.09	K.EITALAPSTMK.I	[316-326]		Used
		Checked	Confidence	Identifying Node	PSM Ambiguity	Annotated Sequence	Modifications	# Protein Groups	# Proteins	Master Protein Accessions	Protein Accessions	# Missed Cleavages	Charge	DeltaScore	DeltaCn	Rank	Search Engine Rank	m/z [Da]	MH+ [Da]	Theo. MH+ [Da]	DeltaM [ppm]	Deltam/z [Da]	Activation Type	MS Order	Isolation Interference [%]	Ion Inject Time [ms]	RT [min]	First Scan	Spectrum File	File ID	Quan Info	Ions Score	Identity Strict	Identity Relaxed	Expectation Value	Percolator q-Value	Percolator PEP	Precursor Abundance	Apex RT [min]
		FALSE	High	Mascot (A5)	Unambiguous	[K].EITALAPSTmK.[I]	M10(Oxidation)	2	6	P68033; P63260	P63268; P60710; P62737; P68134; P68033; P63260	0	2	0.8276	0	1	1	589.315	1177.62	1177.61	7.18	0.00423	HCD (High Energy Collision Dissociation)	MS2	18.9959	16.327	19.2805	8681	MS201900102_Con1.raw	F1		29	40	33	0.128818	0.0004707	0.0133	93377248	19.09
		FALSE	High	Mascot (A5)	Unambiguous	[K].EITALAPSTmK.[I]	M10(Oxidation)	2	6	P68033; P63260	P63268; P60710; P62737; P68134; P68033; P63260	0	2	0.875	0	1	1	589.315	1177.62	1177.61	8.73	0.00514	HCD (High Energy Collision Dissociation)	MS2	6.43364	20.442	18.8455	8185	MS201900102_Con1.raw	F1		40	40	33	0.0107767	0.0004707	0.02385	93377248	19.09
	FALSE	High	[R].GYSFTTTAER.[E]			0.0199452	0.000581891	1	2	1	P63260	P63260 [197-206]	0	1132.53	0	100		High	High	0.0004707	0.0168	57	20.06	R.GYSFTTTAER.E	[197-206]		Used
		Checked	Confidence	Identifying Node	PSM Ambiguity	Annotated Sequence	Modifications	# Protein Groups	# Proteins	Master Protein Accessions	Protein Accessions	# Missed Cleavages	Charge	DeltaScore	DeltaCn	Rank	Search Engine Rank	m/z [Da]	MH+ [Da]	Theo. MH+ [Da]	DeltaM [ppm]	Deltam/z [Da]	Activation Type	MS Order	Isolation Interference [%]	Ion Inject Time [ms]	RT [min]	First Scan	Spectrum File	File ID	Quan Info	Ions Score	Identity Strict	Identity Relaxed	Expectation Value	Percolator q-Value	Percolator PEP	Precursor Abundance	Apex RT [min]
		FALSE	High	Mascot (A5)	Unambiguous	[R].GYSFTTTAER.[E]		1	2	P63260	P60710; P63260	0	2	0.8421	0	1	1	566.771	1132.53	1132.53	6.55	0.00371	HCD (High Energy Collision Dissociation)	MS2	0	11.049	19.9374	9016	MS201900102_Con1.raw	F1		57	41	34	0.000269529	0.0004707	0.0168	94553656	20.06
	FALSE	High	[R].HQGVMVGMGQK.[D]	1xAcetyl [N-Term]	Q8BFZ3 1xAcetyl [N-Term]; P68033 1xAcetyl [N-Term]; P63260 1xAcetyl [N-Term]	0.00261368	0.000581891	3	7	1	Q8BFZ3; P68033; P63260	Q8BFZ3 [41-51]; P68033 [42-52]; P63260 [40-50]	0	1213.58	0	100	Shared	High	High	0.0004707	0.00205	33	18.8	R.HQGVMVGMGQK.D	[40-50]	1xAcetyl [N-Term]	Used
		Checked	Confidence	Identifying Node	PSM Ambiguity	Annotated Sequence	Modifications	# Protein Groups	# Proteins	Master Protein Accessions	Protein Accessions	# Missed Cleavages	Charge	DeltaScore	DeltaCn	Rank	Search Engine Rank	m/z [Da]	MH+ [Da]	Theo. MH+ [Da]	DeltaM [ppm]	Deltam/z [Da]	Activation Type	MS Order	Isolation Interference [%]	Ion Inject Time [ms]	RT [min]	First Scan	Spectrum File	File ID	Quan Info	Ions Score	Identity Strict	Identity Relaxed	Expectation Value	Percolator q-Value	Percolator PEP	Precursor Abundance	Apex RT [min]
		FALSE	High	Mascot (A5)	Unambiguous	[R].hQGVMVGMGQK.[D]	N-Term(Acetyl)	3	7	Q8BFZ3; P68033; P63260	Q8BFZ3; P63268; P60710; P62737; P68134; P68033; P63260	0	2	1	0	1	1	607.3	1213.59	1213.58	9.33	0.00566	HCD (High Energy Collision Dissociation)	MS2	33.7919	25	18.8529	8195	MS201900102_Con1.raw	F1		33	41	34	0.0674939	0.0004707	0.00205	816922	18.8
	FALSE	High	[K].EITALAPSTMK.[I]			0.042039	0.000581891	2	6	1	P68033; P63260	P68033 [318-328]; P63260 [316-326]	0	1161.62	0	100	Shared	High	High	0.0004707	0.03622	34	24.76	K.EITALAPSTMK.I	[316-326]		Used
		Checked	Confidence	Identifying Node	PSM Ambiguity	Annotated Sequence	Modifications	# Protein Groups	# Proteins	Master Protein Accessions	Protein Accessions	# Missed Cleavages	Charge	DeltaScore	DeltaCn	Rank	Search Engine Rank	m/z [Da]	MH+ [Da]	Theo. MH+ [Da]	DeltaM [ppm]	Deltam/z [Da]	Activation Type	MS Order	Isolation Interference [%]	Ion Inject Time [ms]	RT [min]	First Scan	Spectrum File	File ID	Quan Info	Ions Score	Identity Strict	Identity Relaxed	Expectation Value	Percolator q-Value	Percolator PEP	Precursor Abundance	Apex RT [min]
		FALSE	High	Mascot (A5)	Unambiguous	[K].EITALAPSTMK.[I]		2	6	P68033; P63260	P63268; P60710; P62737; P68134; P68033; P63260	0	2	0.7059	0	1	1	581.318	1161.63	1161.62	8.15	0.00473	HCD (High Energy Collision Dissociation)	MS2	0	13.209	24.6205	11408	MS201900102_Con1.raw	F1		34	39	32	0.0393943	0.0004707	0.03622	124247456	24.76
	FALSE	High	[K].AGFAGDDAPR.[A]	1xAcetyl [N-Term]	P68033 1xAcetyl [N-Term]; P63260 1xAcetyl [N-Term]	0.0107968	0.000581891	2	6	2	P68033; P63260	P68033 [21-30]; P63260 [19-28]	0	1018.46	0	100	Shared	High	High	0.0004707	0.008887	17	17.56	K.AGFAGDDAPR.A	[19-28]	1xAcetyl [N-Term]	Used
		Checked	Confidence	Identifying Node	PSM Ambiguity	Annotated Sequence	Modifications	# Protein Groups	# Proteins	Master Protein Accessions	Protein Accessions	# Missed Cleavages	Charge	DeltaScore	DeltaCn	Rank	Search Engine Rank	m/z [Da]	MH+ [Da]	Theo. MH+ [Da]	DeltaM [ppm]	Deltam/z [Da]	Activation Type	MS Order	Isolation Interference [%]	Ion Inject Time [ms]	RT [min]	First Scan	Spectrum File	File ID	Quan Info	Ions Score	Identity Strict	Identity Relaxed	Expectation Value	Percolator q-Value	Percolator PEP	Precursor Abundance	Apex RT [min]
		FALSE	High	Mascot (A5)	Unambiguous	[K].aGFAGDDAPR.[A]	N-Term(Acetyl)	2	6	P68033; P63260	P63268; P60710; P62737; P68134; P68033; P63260	0	2	1	0	1	1	509.739	1018.47	1018.46	11.03	0.00561	HCD (High Energy Collision Dissociation)	MS2	73.3928	17.875	17.5538	6720	MS201900102_Con1.raw	F1		17	39	32	1.61155	0.0004707	0.008887	1.85556e+06	17.56
		FALSE	High	Mascot (A5)	Unambiguous	[K].aGFAGDDAPR.[A]	N-Term(Acetyl)	2	6	P68033; P63260	P63268; P60710; P62737; P68134; P68033; P63260	0	2	1	0	1	1	509.738	1018.47	1018.46	8.99	0.00458	HCD (High Energy Collision Dissociation)	MS2	45.4952	12.907	18.2384	7486	MS201900102_Con1.raw	F1		6	39	32	26.2127	0.002413	0.09315
	FALSE	High	[K].DSYVGDEAQSKR.[G]	1xAcetyl [N-Term]	P68033 1xAcetyl [N-Term]; P63260 1xAcetyl [N-Term]	0.0210173	0.000581891	2	6	1	P68033; P63260	P68033 [53-64]; P63260 [51-62]	1	1396.63	0	100	Shared	High	High	0.0004707	0.01768	27	15.74	K.DSYVGDEAQSKR.G	[51-62]	1xAcetyl [N-Term]	Used
		Checked	Confidence	Identifying Node	PSM Ambiguity	Annotated Sequence	Modifications	# Protein Groups	# Proteins	Master Protein Accessions	Protein Accessions	# Missed Cleavages	Charge	DeltaScore	DeltaCn	Rank	Search Engine Rank	m/z [Da]	MH+ [Da]	Theo. MH+ [Da]	DeltaM [ppm]	Deltam/z [Da]	Activation Type	MS Order	Isolation Interference [%]	Ion Inject Time [ms]	RT [min]	First Scan	Spectrum File	File ID	Quan Info	Ions Score	Identity Strict	Identity Relaxed	Expectation Value	Percolator q-Value	Percolator PEP	Precursor Abundance	Apex RT [min]
		FALSE	High	Mascot (A5)	Unambiguous	[K].dSYVGDEAQSKR.[G]	N-Term(Acetyl)	2	6	P68033; P63260	P63268; P60710; P62737; P68134; P68033; P63260	1	2	1	0	1	1	698.825	1396.64	1396.63	6.15	0.0043	HCD (High Energy Collision Dissociation)	MS2	24.3737	25	15.7209	5443	MS201900102_Con1.raw	F1		27	42	35	0.383732	0.0004707	0.01768	2.24423e+06	15.74
	FALSE	High	[K].DSYVGDEAQSK.[R]	1xAcetyl [N-Term]	P68033 1xAcetyl [N-Term]; P63260 1xAcetyl [N-Term]	0.0062852	0.000581891	2	6	1	P68033; P63260	P68033 [53-63]; P63260 [51-61]	0	1240.53	0	100	Shared	High	High	0.0004707	0.005103	33	17.87	K.DSYVGDEAQSK.R	[51-61]	1xAcetyl [N-Term]	Used
		Checked	Confidence	Identifying Node	PSM Ambiguity	Annotated Sequence	Modifications	# Protein Groups	# Proteins	Master Protein Accessions	Protein Accessions	# Missed Cleavages	Charge	DeltaScore	DeltaCn	Rank	Search Engine Rank	m/z [Da]	MH+ [Da]	Theo. MH+ [Da]	DeltaM [ppm]	Deltam/z [Da]	Activation Type	MS Order	Isolation Interference [%]	Ion Inject Time [ms]	RT [min]	First Scan	Spectrum File	File ID	Quan Info	Ions Score	Identity Strict	Identity Relaxed	Expectation Value	Percolator q-Value	Percolator PEP	Precursor Abundance	Apex RT [min]
		FALSE	High	Mascot (A5)	Unambiguous	[K].dSYVGDEAQSK.[R]	N-Term(Acetyl)	2	6	P68033; P63260	P63268; P60710; P62737; P68134; P68033; P63260	0	2	1	0	1	1	620.778	1240.55	1240.53	12.27	0.00761	HCD (High Energy Collision Dissociation)	MS2	43.215	19.536	17.7825	6962	MS201900102_Con1.raw	F1		33	41	34	0.0733125	0.0004707	0.005103	4.37193e+06	17.87
	FALSE	High	[R].DLTDYLMK.[I]	1xOxidation [M7]		0.075843	0.00154131	3	7	4	Q8BFZ3; P68033; P63260	Q8BFZ3 [185-192]; P68033 [186-193]; P63260 [184-191]	0	1014.48	0	100	Shared	High	High	0.001254	0.0666	23	36.34	R.DLTDYLMK.I	[184-191]		Used
		Checked	Confidence	Identifying Node	PSM Ambiguity	Annotated Sequence	Modifications	# Protein Groups	# Proteins	Master Protein Accessions	Protein Accessions	# Missed Cleavages	Charge	DeltaScore	DeltaCn	Rank	Search Engine Rank	m/z [Da]	MH+ [Da]	Theo. MH+ [Da]	DeltaM [ppm]	Deltam/z [Da]	Activation Type	MS Order	Isolation Interference [%]	Ion Inject Time [ms]	RT [min]	First Scan	Spectrum File	File ID	Quan Info	Ions Score	Identity Strict	Identity Relaxed	Expectation Value	Percolator q-Value	Percolator PEP	Precursor Abundance	Apex RT [min]
		FALSE	High	Mascot (A5)	Unambiguous	[R].DLTDYLmK.[I]	M7(Oxidation)	3	7	Q8BFZ3; P68033; P63260	Q8BFZ3; P63268; P60710; P62737; P68134; P68033; P63260	0	2	0.7391	0	1	1	507.749	1014.49	1014.48	9.53	0.00483	HCD (High Energy Collision Dissociation)	MS2	0	25	37.6366	22065	MS201900102_Con1.raw	F1		23	39	32	0.37728	0.001254	0.0666	712411	37.78
		FALSE	High	Mascot (A5)	Unambiguous	[R].DLTDYLmK.[I]	M7(Oxidation)	3	7	Q8BFZ3; P68033; P63260	Q8BFZ3; P63268; P60710; P62737; P68134; P68033; P63260	0	2	0.8125	0	1	1	507.747	1014.49	1014.48	5.74	0.00291	HCD (High Energy Collision Dissociation)	MS2	0	25	38.8083	23414	MS201900102_Con1.raw	F1		16	39	32	2.11448	0.001254	0.07165	296965	39.03
		FALSE	High	Mascot (A5)	Unambiguous	[R].DLTDYLmK.[I]	M7(Oxidation)	3	7	Q8BFZ3; P68033; P63260	Q8BFZ3; P63268; P60710; P62737; P68134; P68033; P63260	0	2	0.6957	0	1	1	507.748	1014.49	1014.48	8.21	0.00416	HCD (High Energy Collision Dissociation)	MS2	39.6565	25	36.0639	20255	MS201900102_Con1.raw	F1		23	38	31	0.420817	0.004901	0.1736	52444692	36.34
		FALSE	High	Mascot (A5)	Unambiguous	[R].DLTDYLmK.[I]	M7(Oxidation)	3	7	Q8BFZ3; P68033; P63260	Q8BFZ3; P63268; P60710; P62737; P68134; P68033; P63260	0	2	1	0	1	1	507.749	1014.49	1014.48	9.23	0.00468	HCD (High Energy Collision Dissociation)	MS2	50.5002	25	40.5939	25552	MS201900102_Con1.raw	F1		8	39	32	11.8565	0.004901	0.1674
	FALSE	High	[K].IIAPPER.[K]			0.044965	0.00154131	3	7	1	Q8BFZ3; P68033; P63260	Q8BFZ3 [330-336]; P68033 [331-337]; P63260 [329-335]	0	795.472	0	100	Shared	High	High	0.001254	0.03897	47	15.87	K.IIAPPER.K	[329-335]		Used
		Checked	Confidence	Identifying Node	PSM Ambiguity	Annotated Sequence	Modifications	# Protein Groups	# Proteins	Master Protein Accessions	Protein Accessions	# Missed Cleavages	Charge	DeltaScore	DeltaCn	Rank	Search Engine Rank	m/z [Da]	MH+ [Da]	Theo. MH+ [Da]	DeltaM [ppm]	Deltam/z [Da]	Activation Type	MS Order	Isolation Interference [%]	Ion Inject Time [ms]	RT [min]	First Scan	Spectrum File	File ID	Quan Info	Ions Score	Identity Strict	Identity Relaxed	Expectation Value	Percolator q-Value	Percolator PEP	Precursor Abundance	Apex RT [min]
		FALSE	High	Mascot (A5)	Unambiguous	[K].IIAPPER.[K]		3	7	Q8BFZ3; P68033; P63260	Q8BFZ3; P63268; P60710; P62737; P68134; P68033; P63260	0	2	0.766	0	1	1	398.243	795.479	795.472	8.01	0.00319	HCD (High Energy Collision Dissociation)	MS2	0	25	15.8892	5643	MS201900102_Con1.raw	F1		47	27	20	0.000108095	0.001254	0.03897	2.79652e+06	15.87
FALSE	High	Master Protein	Q7TMM9	Tubulin beta-2A chain OS=Mus musculus OX=10090 GN=Tubb2a PE=1 SV=1	0	72.011	35	13	35	2	1	445	49.9	4.89	950	13	cell organization and biogenesis	cytoplasm;cytoskeleton;nucleus	catalytic activity;nucleotide binding;structural molecule activity	Pf00091, Pf03953, Pf10644	22151	ENSMUSG00000058672.6	Tubb2a	13		Phagosome; Gap junction	0		High
	Checked	Confidence	Annotated Sequence	Modifications	Modifications in Master Proteins	Qvality PEP	Qvality q-value	# Protein Groups	# Proteins	# PSMs	Master Protein Accessions	Positions in Master Proteins	# Missed Cleavages	Theo. MH+ [Da]	# Razor Quan Results	Abundances (Scaled): F1: Sample	Quan Info	Found in Sample: [S1] F1: Sample	Confidence (by Search Engine): Mascot	Percolator q-Value (by Search Engine): Mascot	Percolator PEP (by Search Engine): Mascot	Ions Score (by Search Engine): Mascot	Top Apex RT [min]	Sequence in Protein	Positions in Protein	Peptide Group Modifications in Protein	Quan Usage
	FALSE	High	[R].SGPFGQIFRPDNFVFGQSGAGNNWAK.[G]			5.3834e-07	0	3	5	1	Q7TMM9; Q9D6F9; P99024	Q7TMM9 [78-103]; Q9D6F9 [78-103]; P99024 [78-103]	0	2798.34	0	100	Shared	High	High	0	3.176e-07	65	59.15	R.SGPFGQIFRPDNFVFGQSGAGNNWAK.G	[78-103]		Not Used
		Checked	Confidence	Identifying Node	PSM Ambiguity	Annotated Sequence	Modifications	# Protein Groups	# Proteins	Master Protein Accessions	Protein Accessions	# Missed Cleavages	Charge	DeltaScore	DeltaCn	Rank	Search Engine Rank	m/z [Da]	MH+ [Da]	Theo. MH+ [Da]	DeltaM [ppm]	Deltam/z [Da]	Activation Type	MS Order	Isolation Interference [%]	Ion Inject Time [ms]	RT [min]	First Scan	Spectrum File	File ID	Quan Info	Ions Score	Identity Strict	Identity Relaxed	Expectation Value	Percolator q-Value	Percolator PEP	Precursor Abundance	Apex RT [min]
		FALSE	High	Mascot (A5)	Unambiguous	[R].SGPFGQIFRPDNFVFGQSGAGNNWAK.[G]		3	5	Q7TMM9; Q9D6F9; P99024	Q7TMM9; Q9D6F9; P99024; P68372; Q9CWF2	0	3	1	0	1	1	933.461	2798.37	2798.34	8.89	0.0083	HCD (High Energy Collision Dissociation)	MS2	0	17.751	59.1226	41843	MS201900102_Con1.raw	F1		65	45	38	0.000103481	0	3.176e-07	10490575	59.15
	FALSE	High	[R].FPGQLNADLR.[K]			0.000171563	0	4	8	5	Q7TMM9; Q9D6F9; P99024; Q922F4	Q7TMM9 [242-251]; Q9D6F9 [242-251]; P99024 [242-251]; Q922F4 [242-251]	0	1130.6	0	100	Shared	High	High	0	0.0001439	63	29.5	R.FPGQLNADLR.K	[242-251]		Not Used
		Checked	Confidence	Identifying Node	PSM Ambiguity	Annotated Sequence	Modifications	# Protein Groups	# Proteins	Master Protein Accessions	Protein Accessions	# Missed Cleavages	Charge	DeltaScore	DeltaCn	Rank	Search Engine Rank	m/z [Da]	MH+ [Da]	Theo. MH+ [Da]	DeltaM [ppm]	Deltam/z [Da]	Activation Type	MS Order	Isolation Interference [%]	Ion Inject Time [ms]	RT [min]	First Scan	Spectrum File	File ID	Quan Info	Ions Score	Identity Strict	Identity Relaxed	Expectation Value	Percolator q-Value	Percolator PEP	Precursor Abundance	Apex RT [min]
		FALSE	High	Mascot (A5)	Unambiguous	[R].FPGQLNADLR.[K]		4	8	Q7TMM9; Q9D6F9; P99024; Q922F4	Q7TMM9; Q9D6F9; Q9ERD7; A2AQ07; P99024; P68372; Q9CWF2; Q922F4	0	2	0.873	0	1	1	565.804	1130.6	1130.6	5.6	0.00316	HCD (High Energy Collision Dissociation)	MS2	0	25	30.6335	15649	MS201900102_Con1.raw	F1		63	41	34	6.94402e-05	0	0.0001439
		FALSE	High	Mascot (A5)	Unambiguous	[R].FPGQLNADLR.[K]		4	8	Q7TMM9; Q9D6F9; P99024; Q922F4	Q7TMM9; Q9D6F9; Q9ERD7; A2AQ07; P99024; P68372; Q9CWF2; Q922F4	0	2	0.9444	0	1	1	565.805	1130.6	1130.6	6.57	0.00371	HCD (High Energy Collision Dissociation)	MS2	0	25	29.3383	14526	MS201900102_Con1.raw	F1		54	40	33	0.000444913	0	0.0001229	17558940	29.5
		FALSE	High	Mascot (A5)	Unambiguous	[R].FPGQLNADLR.[K]		4	8	Q7TMM9; Q9D6F9; P99024; Q922F4	Q7TMM9; Q9D6F9; Q9ERD7; A2AQ07; P99024; P68372; Q9CWF2; Q922F4	0	2	0.8913	0	1	1	565.806	1130.6	1130.6	8.08	0.00457	HCD (High Energy Collision Dissociation)	MS2	0	23.554	29.783	14897	MS201900102_Con1.raw	F1		46	40	33	0.00319532	0	0.001142	17558940	29.5
		FALSE	High	Mascot (A5)	Unambiguous	[R].FPGQLNADLR.[K]		4	8	Q7TMM9; Q9D6F9; P99024; Q922F4	Q7TMM9; Q9D6F9; Q9ERD7; A2AQ07; P99024; P68372; Q9CWF2; Q922F4	0	2	0.8621	0	1	1	565.806	1130.61	1130.6	8.94	0.00506	HCD (High Energy Collision Dissociation)	MS2	0	23.751	30.2062	15294	MS201900102_Con1.raw	F1		58	40	33	0.000175776	0	0.0003616
		FALSE	High	Mascot (A5)	Unambiguous	[R].FPGQLNADLR.[K]		4	8	Q7TMM9; Q9D6F9; P99024; Q922F4	Q7TMM9; Q9D6F9; Q9ERD7; A2AQ07; P99024; P68372; Q9CWF2; Q922F4	0	2	0.9615	0	1	1	565.805	1130.6	1130.6	6.68	0.00377	HCD (High Energy Collision Dissociation)	MS2	21.2557	19.898	31.369	16277	MS201900102_Con1.raw	F1		52	40	33	0.000757313	0.0004707	0.002299
	FALSE	High	[K].GHYTEGAELVDSVLDVVRK.[E]			0.000426138	0	3	6	1	Q7TMM9; P99024; Q922F4	Q7TMM9 [104-122]; P99024 [104-122]; Q922F4 [104-122]	1	2087.08	0	100	Shared	High	High	0	0.0003159	32	48.92	K.GHYTEGAELVDSVLDVVRK.E	[104-122]		Not Used
		Checked	Confidence	Identifying Node	PSM Ambiguity	Annotated Sequence	Modifications	# Protein Groups	# Proteins	Master Protein Accessions	Protein Accessions	# Missed Cleavages	Charge	DeltaScore	DeltaCn	Rank	Search Engine Rank	m/z [Da]	MH+ [Da]	Theo. MH+ [Da]	DeltaM [ppm]	Deltam/z [Da]	Activation Type	MS Order	Isolation Interference [%]	Ion Inject Time [ms]	RT [min]	First Scan	Spectrum File	File ID	Quan Info	Ions Score	Identity Strict	Identity Relaxed	Expectation Value	Percolator q-Value	Percolator PEP	Precursor Abundance	Apex RT [min]
		FALSE	High	Mascot (A5)	Unambiguous	[K].GHYTEGAELVDSVLDVVRK.[E]		3	6	Q7TMM9; P99024; Q922F4	Q7TMM9; Q9ERD7; P99024; P68372; Q9CWF2; Q922F4	1	3	1	0	1	1	696.369	2087.09	2087.08	8.16	0.00568	HCD (High Energy Collision Dissociation)	MS2	28.7227	12.748	48.8127	34789	MS201900102_Con1.raw	F1		32	41	34	0.100497	0	0.0003159	7.61863e+06	48.92
	FALSE	High	[K].GHYTEGAELVDSVLDVVR.[K]			7.79497e-05	0	3	6	3	Q7TMM9; P99024; Q922F4	Q7TMM9 [104-121]; P99024 [104-121]; Q922F4 [104-121]	0	1958.98	0	100	Shared	High	High	0	5.455e-05	74	56.64	K.GHYTEGAELVDSVLDVVR.K	[104-121]		Not Used
		Checked	Confidence	Identifying Node	PSM Ambiguity	Annotated Sequence	Modifications	# Protein Groups	# Proteins	Master Protein Accessions	Protein Accessions	# Missed Cleavages	Charge	DeltaScore	DeltaCn	Rank	Search Engine Rank	m/z [Da]	MH+ [Da]	Theo. MH+ [Da]	DeltaM [ppm]	Deltam/z [Da]	Activation Type	MS Order	Isolation Interference [%]	Ion Inject Time [ms]	RT [min]	First Scan	Spectrum File	File ID	Quan Info	Ions Score	Identity Strict	Identity Relaxed	Expectation Value	Percolator q-Value	Percolator PEP	Precursor Abundance	Apex RT [min]
		FALSE	High	Mascot (A5)	Unambiguous	[K].GHYTEGAELVDSVLDVVR.[K]		3	6	Q7TMM9; P99024; Q922F4	Q7TMM9; Q9ERD7; P99024; P68372; Q9CWF2; Q922F4	0	3	1	0	1	1	653.672	1959	1958.98	9.37	0.00612	HCD (High Energy Collision Dissociation)	MS2	0	25	56.4426	39105	MS201900102_Con1.raw	F1		28	42	35	0.306493	0	0.0005511	25320072	56.64
		FALSE	High	Mascot (A5)	Unambiguous	[K].GHYTEGAELVDSVLDVVR.[K]		3	6	Q7TMM9; P99024; Q922F4	Q7TMM9; Q9ERD7; P99024; P68372; Q9CWF2; Q922F4	0	2	1	0	1	1	980.004	1959	1958.98	9.57	0.00937	HCD (High Energy Collision Dissociation)	MS2	0	25	40.441	25366	MS201900102_Con1.raw	F1		74	42	35	7.35921e-06	0	5.455e-05	473777	40.42
		FALSE	High	Mascot (A5)	Unambiguous	[K].GHYTEGAELVDSVLDVVR.[K]		3	6	Q7TMM9; P99024; Q922F4	Q7TMM9; Q9ERD7; P99024; P68372; Q9CWF2; Q922F4	0	3	1	0	1	1	653.671	1959	1958.98	8.44	0.00551	HCD (High Energy Collision Dissociation)	MS2	1.68222	8.385	56.8958	39522	MS201900102_Con1.raw	F1		62	42	35	0.000121845	0	8.151e-05	25320072	56.64
	FALSE	High	[K].LAVNMVPFPR.[L]	1xOxidation [M5]		0.000717206	0	4	8	3	Q7TMM9; Q9D6F9; P99024; Q922F4	Q7TMM9 [253-262]; Q9D6F9 [253-262]; P99024 [253-262]; Q922F4 [253-262]	0	1159.63	0	100	Shared	High	High	0	0.0005401	44	33.45	K.LAVNMVPFPR.L	[253-262]		Not Used
		Checked	Confidence	Identifying Node	PSM Ambiguity	Annotated Sequence	Modifications	# Protein Groups	# Proteins	Master Protein Accessions	Protein Accessions	# Missed Cleavages	Charge	DeltaScore	DeltaCn	Rank	Search Engine Rank	m/z [Da]	MH+ [Da]	Theo. MH+ [Da]	DeltaM [ppm]	Deltam/z [Da]	Activation Type	MS Order	Isolation Interference [%]	Ion Inject Time [ms]	RT [min]	First Scan	Spectrum File	File ID	Quan Info	Ions Score	Identity Strict	Identity Relaxed	Expectation Value	Percolator q-Value	Percolator PEP	Precursor Abundance	Apex RT [min]
		FALSE	High	Mascot (A5)	Unambiguous	[K].LAVNmVPFPR.[L]	M5(Oxidation)	4	8	Q7TMM9; Q9D6F9; P99024; Q922F4	Q7TMM9; Q9D6F9; Q9ERD7; A2AQ07; P99024; P68372; Q9CWF2; Q922F4	0	2	0.9773	0	1	1	580.323	1159.64	1159.63	9.03	0.00523	HCD (High Energy Collision Dissociation)	MS2	0	25	33.6167	18108	MS201900102_Con1.raw	F1		44	39	32	0.00386819	0	0.0005401	7107877	33.45
		FALSE	High	Mascot (A5)	Unambiguous	[K].LAVNmVPFPR.[L]	M5(Oxidation)	4	8	Q7TMM9; Q9D6F9; P99024; Q922F4	Q7TMM9; Q9D6F9; Q9ERD7; A2AQ07; P99024; P68372; Q9CWF2; Q922F4	0	2	1	0	1	1	580.33	1159.65	1159.63	19.56	0.01134	HCD (High Energy Collision Dissociation)	MS2	25.9586	12.021	32.878	17551	MS201900102_Con1.raw	F1	Not Reliable	41	38	31	0.00630451	0	0.0008969
		FALSE	High	Mascot (A5)	Unambiguous	[K].LAVNmVPFPR.[L]	M5(Oxidation)	4	8	Q7TMM9; Q9D6F9; P99024; Q922F4	Q7TMM9; Q9D6F9; Q9ERD7; A2AQ07; P99024; P68372; Q9CWF2; Q922F4	0	2	0.9756	0	1	1	580.324	1159.64	1159.63	9.13	0.0053	HCD (High Energy Collision Dissociation)	MS2	18.7899	19.629	33.1542	17745	MS201900102_Con1.raw	F1		41	39	32	0.00771805	0.0004707	0.005392	6.20909e+06	32.98
	FALSE	High	[K].MSATFIGNSTAIQELFK.[R]	1xOxidation [M1]		3.22172e-05	0	1	3	1	Q7TMM9	Q7TMM9 [363-379]	0	1873.94	0		No Quan Values	High	High	0	2.181e-05	58		K.MSATFIGNSTAIQELFK.R	[363-379]		Not Used
		Checked	Confidence	Identifying Node	PSM Ambiguity	Annotated Sequence	Modifications	# Protein Groups	# Proteins	Master Protein Accessions	Protein Accessions	# Missed Cleavages	Charge	DeltaScore	DeltaCn	Rank	Search Engine Rank	m/z [Da]	MH+ [Da]	Theo. MH+ [Da]	DeltaM [ppm]	Deltam/z [Da]	Activation Type	MS Order	Isolation Interference [%]	Ion Inject Time [ms]	RT [min]	First Scan	Spectrum File	File ID	Quan Info	Ions Score	Identity Strict	Identity Relaxed	Expectation Value	Percolator q-Value	Percolator PEP	Precursor Abundance	Apex RT [min]
		FALSE	High	Mascot (A5)	Unambiguous	[K].mSATFIGNSTAIQELFK.[R]	M1(Oxidation)	1	3	Q7TMM9	Q7TMM9; P68372; Q9CWF2	0	2	0.1207	0	1	1	937.48	1873.95	1873.94	8.48	0.00795	HCD (High Energy Collision Dissociation)	MS2	0	25	56.4442	39107	MS201900102_Con1.raw	F1		58	42	35	0.000268788	0	2.181e-05	5.66434e+06	56.46
	FALSE	High	[K].MSATFIGNSTAIQELFK.[R]			3.39229e-06	0	1	3	2	Q7TMM9	Q7TMM9 [363-379]	0	1857.94	0		No Quan Values	High	High	0	2.13e-06	55	61.33	K.MSATFIGNSTAIQELFK.R	[363-379]		Not Used
		Checked	Confidence	Identifying Node	PSM Ambiguity	Annotated Sequence	Modifications	# Protein Groups	# Proteins	Master Protein Accessions	Protein Accessions	# Missed Cleavages	Charge	DeltaScore	DeltaCn	Rank	Search Engine Rank	m/z [Da]	MH+ [Da]	Theo. MH+ [Da]	DeltaM [ppm]	Deltam/z [Da]	Activation Type	MS Order	Isolation Interference [%]	Ion Inject Time [ms]	RT [min]	First Scan	Spectrum File	File ID	Quan Info	Ions Score	Identity Strict	Identity Relaxed	Expectation Value	Percolator q-Value	Percolator PEP	Precursor Abundance	Apex RT [min]
		FALSE	High	Mascot (A5)	Rejected	[K].MSATFIGNSTAIQELFK.[R]		1	3	Q7TMM9	Q7TMM9; P68372; Q9CWF2	0	2		0	2	2	929.482	1857.96	1857.94	8.25	0.00766	HCD (High Energy Collision Dissociation)	MS2	46.6929	15.248	61.4866	44021	MS201900102_Con1.raw	F1		55	42	35	0.000510181	0	2.13e-06	4997223	61.33
		FALSE	High	Mascot (A5)	Rejected	[K].MSATFIGNSTAIQELFK.[R]		1	3	Q7TMM9	Q7TMM9; P68372; Q9CWF2	0	2		0	2	2	929.484	1857.96	1857.94	10.68	0.00992	HCD (High Energy Collision Dissociation)	MS2	46.5209	25	61.0442	43616	MS201900102_Con1.raw	F1		23	42	35	0.87572	0.0004707	0.002621	4997223	61.33
	FALSE	High	[R].ISEQFTAMFR.[R]			0.000932872	0	3	6	2	Q7TMM9; Q9D6F9; P99024	Q7TMM9 [381-390]; Q9D6F9 [381-390]; P99024 [381-390]	0	1229.6	0	100	Shared	High	High	0.0004707	0.001787	62	40.51	R.ISEQFTAMFR.R	[381-390]		Not Used
		Checked	Confidence	Identifying Node	PSM Ambiguity	Annotated Sequence	Modifications	# Protein Groups	# Proteins	Master Protein Accessions	Protein Accessions	# Missed Cleavages	Charge	DeltaScore	DeltaCn	Rank	Search Engine Rank	m/z [Da]	MH+ [Da]	Theo. MH+ [Da]	DeltaM [ppm]	Deltam/z [Da]	Activation Type	MS Order	Isolation Interference [%]	Ion Inject Time [ms]	RT [min]	First Scan	Spectrum File	File ID	Quan Info	Ions Score	Identity Strict	Identity Relaxed	Expectation Value	Percolator q-Value	Percolator PEP	Precursor Abundance	Apex RT [min]
		FALSE	High	Mascot (A5)	Unambiguous	[R].ISEQFTAMFR.[R]		3	6	Q7TMM9; Q9D6F9; P99024	Q7TMM9; Q9D6F9; Q9ERD7; P99024; P68372; Q9CWF2	0	2	0.8136	0	1	1	615.308	1229.61	1229.6	7.64	0.0047	HCD (High Energy Collision Dissociation)	MS2	0	25	40.3305	25233	MS201900102_Con1.raw	F1		59	41	34	0.000184969	0	0.0007067	12233424	40.51
		FALSE	High	Mascot (A5)	Unambiguous	[R].ISEQFTAMFR.[R]		3	6	Q7TMM9; Q9D6F9; P99024	Q7TMM9; Q9D6F9; Q9ERD7; P99024; P68372; Q9CWF2	0	2	0.8065	0	1	1	615.308	1229.61	1229.6	7.94	0.00488	HCD (High Energy Collision Dissociation)	MS2	0	25	40.7827	25776	MS201900102_Con1.raw	F1		62	41	34	8.45794e-05	0.0004707	0.001787	12233424	40.51
	FALSE	High	[K].LAVNMVPFPR.[L]			0.000817964	0	4	8	3	Q7TMM9; Q9D6F9; P99024; Q922F4	Q7TMM9 [253-262]; Q9D6F9 [253-262]; P99024 [253-262]; Q922F4 [253-262]	0	1143.63	0	100	Shared	High	High	0	0.0006193	52	40.39	K.LAVNMVPFPR.L	[253-262]		Not Used
		Checked	Confidence	Identifying Node	PSM Ambiguity	Annotated Sequence	Modifications	# Protein Groups	# Proteins	Master Protein Accessions	Protein Accessions	# Missed Cleavages	Charge	DeltaScore	DeltaCn	Rank	Search Engine Rank	m/z [Da]	MH+ [Da]	Theo. MH+ [Da]	DeltaM [ppm]	Deltam/z [Da]	Activation Type	MS Order	Isolation Interference [%]	Ion Inject Time [ms]	RT [min]	First Scan	Spectrum File	File ID	Quan Info	Ions Score	Identity Strict	Identity Relaxed	Expectation Value	Percolator q-Value	Percolator PEP	Precursor Abundance	Apex RT [min]
		FALSE	High	Mascot (A5)	Unambiguous	[K].LAVNMVPFPR.[L]		4	8	Q7TMM9; Q9D6F9; P99024; Q922F4	Q7TMM9; Q9D6F9; Q9ERD7; A2AQ07; P99024; P68372; Q9CWF2; Q922F4	0	2	0.8077	0	1	1	572.325	1143.64	1143.63	8.02	0.00458	HCD (High Energy Collision Dissociation)	MS2	10.7246	25	40.668	25642	MS201900102_Con1.raw	F1		52	39	32	0.000495343	0	0.0006193	17076352	40.39
		FALSE	High	Mascot (A5)	Unambiguous	[K].LAVNMVPFPR.[L]		4	8	Q7TMM9; Q9D6F9; P99024; Q922F4	Q7TMM9; Q9D6F9; Q9ERD7; A2AQ07; P99024; P68372; Q9CWF2; Q922F4	0	2	0.8039	0	1	1	572.324	1143.64	1143.63	4.92	0.00281	HCD (High Energy Collision Dissociation)	MS2	50.3912	25	40.189	25062	MS201900102_Con1.raw	F1		51	39	32	0.000679781	0.0004707	0.003236	17076352	40.39
		FALSE	High	Mascot (A5)	Unambiguous	[K].LAVNMVPFPR.[L]		4	8	Q7TMM9; Q9D6F9; P99024; Q922F4	Q7TMM9; Q9D6F9; Q9ERD7; A2AQ07; P99024; P68372; Q9CWF2; Q922F4	0	2	0.7778	0	1	1	572.311	1143.62	1143.63	-16.75	-0.00958	HCD (High Energy Collision Dissociation)	MS2	54.1231	25	40.9494	25978	MS201900102_Con1.raw	F1		36	40	33	0.030704	0.0004707	0.001928
	FALSE	High	[K].NSSYFVEWIPNNVK.[TV]			0.000288762	0	4	7	1	Q7TMM9; Q9D6F9; P99024; Q922F4	Q7TMM9 [337-350]; Q9D6F9 [337-350]; P99024 [337-350]; Q922F4 [337-350]	0	1696.83	0	100	Shared	High	High	0	0.0002107	46	49.2	K.NSSYFVEWIPNNVK.T	[337-350]		Not Used
		Checked	Confidence	Identifying Node	PSM Ambiguity	Annotated Sequence	Modifications	# Protein Groups	# Proteins	Master Protein Accessions	Protein Accessions	# Missed Cleavages	Charge	DeltaScore	DeltaCn	Rank	Search Engine Rank	m/z [Da]	MH+ [Da]	Theo. MH+ [Da]	DeltaM [ppm]	Deltam/z [Da]	Activation Type	MS Order	Isolation Interference [%]	Ion Inject Time [ms]	RT [min]	First Scan	Spectrum File	File ID	Quan Info	Ions Score	Identity Strict	Identity Relaxed	Expectation Value	Percolator q-Value	Percolator PEP	Precursor Abundance	Apex RT [min]
		FALSE	High	Mascot (A5)	Unambiguous	[K].NSSYFVEWIPNNVK.[TV]		4	7	Q7TMM9; Q9D6F9; P99024; Q922F4	Q7TMM9; Q9D6F9; Q9ERD7; P99024; P68372; Q9CWF2; Q922F4	0	2	0.9565	0	1	1	848.929	1696.85	1696.83	10.14	0.0086	HCD (High Energy Collision Dissociation)	MS2	18.2472	24.824	49.0208	35019	MS201900102_Con1.raw	F1		46	42	35	0.0051057	0	0.0002107	38086028	49.2
	FALSE	High	[R].LHFFMPGFAPLTSR.[G]			0.00210709	0	3	5	1	Q7TMM9; Q9D6F9; P99024	Q7TMM9 [263-276]; Q9D6F9 [263-276]; P99024 [263-276]	0	1620.84	0	100	Shared	High	High	0	0.001642	44	49.43	R.LHFFMPGFAPLTSR.G	[263-276]		Not Used
		Checked	Confidence	Identifying Node	PSM Ambiguity	Annotated Sequence	Modifications	# Protein Groups	# Proteins	Master Protein Accessions	Protein Accessions	# Missed Cleavages	Charge	DeltaScore	DeltaCn	Rank	Search Engine Rank	m/z [Da]	MH+ [Da]	Theo. MH+ [Da]	DeltaM [ppm]	Deltam/z [Da]	Activation Type	MS Order	Isolation Interference [%]	Ion Inject Time [ms]	RT [min]	First Scan	Spectrum File	File ID	Quan Info	Ions Score	Identity Strict	Identity Relaxed	Expectation Value	Percolator q-Value	Percolator PEP	Precursor Abundance	Apex RT [min]
		FALSE	High	Mascot (A5)	Unambiguous	[R].LHFFMPGFAPLTSR.[G]		3	5	Q7TMM9; Q9D6F9; P99024	Q7TMM9; Q9D6F9; P99024; P68372; Q9CWF2	0	2	0.7045	0	1	1	810.928	1620.85	1620.84	8.11	0.00658	HCD (High Energy Collision Dissociation)	MS2	0	25	49.3915	35427	MS201900102_Con1.raw	F1		44	41	34	0.00527559	0	0.001642	5.77768e+06	49.43
	FALSE	High	[R].LHFFMPGFAPLTSR.[G]	1xOxidation [M5]		3.27295e-05	0	3	5	2	Q7TMM9; Q9D6F9; P99024	Q7TMM9 [263-276]; Q9D6F9 [263-276]; P99024 [263-276]	0	1636.83	0	100	Shared	High	High	0	2.22e-05	49	43.39	R.LHFFMPGFAPLTSR.G	[263-276]		Not Used
		Checked	Confidence	Identifying Node	PSM Ambiguity	Annotated Sequence	Modifications	# Protein Groups	# Proteins	Master Protein Accessions	Protein Accessions	# Missed Cleavages	Charge	DeltaScore	DeltaCn	Rank	Search Engine Rank	m/z [Da]	MH+ [Da]	Theo. MH+ [Da]	DeltaM [ppm]	Deltam/z [Da]	Activation Type	MS Order	Isolation Interference [%]	Ion Inject Time [ms]	RT [min]	First Scan	Spectrum File	File ID	Quan Info	Ions Score	Identity Strict	Identity Relaxed	Expectation Value	Percolator q-Value	Percolator PEP	Precursor Abundance	Apex RT [min]
		FALSE	High	Mascot (A5)	Unambiguous	[R].LHFFmPGFAPLTSR.[G]	M5(Oxidation)	3	5	Q7TMM9; Q9D6F9; P99024	Q7TMM9; Q9D6F9; P99024; P68372; Q9CWF2	0	3	1	0	1	1	546.288	1636.85	1636.83	11.77	0.00642	HCD (High Energy Collision Dissociation)	MS2	15.5237	25	43.2517	28634	MS201900102_Con1.raw	F1		49	41	34	0.00197796	0	2.22e-05	3.54724e+06	43.39
		FALSE	High	Mascot (A5)	Unambiguous	[R].LHFFmPGFAPLTSR.[G]	M5(Oxidation)	3	5	Q7TMM9; Q9D6F9; P99024	Q7TMM9; Q9D6F9; P99024; P68372; Q9CWF2	0	3	1	0	1	1	546.286	1636.84	1636.83	8.75	0.00477	HCD (High Energy Collision Dissociation)	MS2	81.8011	25	43.7275	29199	MS201900102_Con1.raw	F1		12	41	34	9.80028	0.0004707	0.01803	3.54724e+06	43.39
	FALSE	High	[R].AILVDLEPGTMDSVR.[S]			5.5089e-05	0	2	4	2	Q7TMM9; P99024	Q7TMM9 [63-77]; P99024 [63-77]	0	1615.84	0	100	Shared	High	High	0	3.811e-05	58	45.15	R.AILVDLEPGTMDSVR.S	[63-77]		Not Used
		Checked	Confidence	Identifying Node	PSM Ambiguity	Annotated Sequence	Modifications	# Protein Groups	# Proteins	Master Protein Accessions	Protein Accessions	# Missed Cleavages	Charge	DeltaScore	DeltaCn	Rank	Search Engine Rank	m/z [Da]	MH+ [Da]	Theo. MH+ [Da]	DeltaM [ppm]	Deltam/z [Da]	Activation Type	MS Order	Isolation Interference [%]	Ion Inject Time [ms]	RT [min]	First Scan	Spectrum File	File ID	Quan Info	Ions Score	Identity Strict	Identity Relaxed	Expectation Value	Percolator q-Value	Percolator PEP	Precursor Abundance	Apex RT [min]
		FALSE	High	Mascot (A5)	Unambiguous	[R].AILVDLEPGTMDSVR.[S]		2	4	Q7TMM9; P99024	Q7TMM9; Q9ERD7; P99024; Q9CWF2	0	2	0.9483	0	1	1	808.429	1615.85	1615.84	9.6	0.00775	HCD (High Energy Collision Dissociation)	MS2	0	21.829	45.3765	30967	MS201900102_Con1.raw	F1		58	41	34	0.000205446	0	3.811e-05	30039578	45.15
		FALSE	High	Mascot (A5)	Unambiguous	[R].AILVDLEPGTMDSVR.[S]		2	4	Q7TMM9; P99024	Q7TMM9; Q9ERD7; P99024; Q9CWF2	0	2	0.9333	0	1	1	808.43	1615.85	1615.84	9.97	0.00806	HCD (High Energy Collision Dissociation)	MS2	0	25	44.9194	30470	MS201900102_Con1.raw	F1		45	41	34	0.00399293	0.0004707	0.002838	30039578	45.15
	FALSE	High	[K].EVDEQMLNVQNK.[N]			0.000622278	0	2	4	2	Q7TMM9; P99024	Q7TMM9 [325-336]; P99024 [325-336]	0	1446.69	0	100	Shared	High	High	0	0.0004664	51	24.72	K.EVDEQMLNVQNK.N	[325-336]		Not Used
		Checked	Confidence	Identifying Node	PSM Ambiguity	Annotated Sequence	Modifications	# Protein Groups	# Proteins	Master Protein Accessions	Protein Accessions	# Missed Cleavages	Charge	DeltaScore	DeltaCn	Rank	Search Engine Rank	m/z [Da]	MH+ [Da]	Theo. MH+ [Da]	DeltaM [ppm]	Deltam/z [Da]	Activation Type	MS Order	Isolation Interference [%]	Ion Inject Time [ms]	RT [min]	First Scan	Spectrum File	File ID	Quan Info	Ions Score	Identity Strict	Identity Relaxed	Expectation Value	Percolator q-Value	Percolator PEP	Precursor Abundance	Apex RT [min]
		FALSE	High	Mascot (A5)	Unambiguous	[K].EVDEQMLNVQNK.[N]		2	4	Q7TMM9; P99024	Q7TMM9; P99024; P68372; Q9CWF2	0	2	1	0	1	1	723.852	1446.7	1446.69	4.77	0.00345	HCD (High Energy Collision Dissociation)	MS2	0	20.407	24.6236	11412	MS201900102_Con1.raw	F1		51	42	35	0.00134381	0	0.0004664	33490334	24.72
		FALSE	High	Mascot (A5)	Unambiguous	[K].EVDEQMLNVQNK.[N]		2	4	Q7TMM9; P99024	Q7TMM9; P99024; P68372; Q9CWF2	0	2	1	0	1	1	723.854	1446.7	1446.69	7.97	0.00577	HCD (High Energy Collision Dissociation)	MS2	0	5.311	24.6585	11437	MS201900102_Con1.raw	F1		47	42	35	0.00347947	0.0004707	0.005461	33490334	24.72
	FALSE	High	[R].YLTVAAIFR.[G]			0.00475756	0.000581891	1	2	1	Q7TMM9	Q7TMM9 [310-318]	0	1053.61	0		No Quan Values	High	High	0.0004707	0.003811	46		R.YLTVAAIFR.G	[310-318]		Not Used
		Checked	Confidence	Identifying Node	PSM Ambiguity	Annotated Sequence	Modifications	# Protein Groups	# Proteins	Master Protein Accessions	Protein Accessions	# Missed Cleavages	Charge	DeltaScore	DeltaCn	Rank	Search Engine Rank	m/z [Da]	MH+ [Da]	Theo. MH+ [Da]	DeltaM [ppm]	Deltam/z [Da]	Activation Type	MS Order	Isolation Interference [%]	Ion Inject Time [ms]	RT [min]	First Scan	Spectrum File	File ID	Quan Info	Ions Score	Identity Strict	Identity Relaxed	Expectation Value	Percolator q-Value	Percolator PEP	Precursor Abundance	Apex RT [min]
		FALSE	High	Mascot (A5)	Unambiguous	[R].YLTVAAIFR.[G]		1	2	Q7TMM9	Q7TMM9; Q9CWF2	0	2	0.4565	0	1	1	527.312	1053.62	1053.61	8.03	0.00423	HCD (High Energy Collision Dissociation)	MS2	17.1445	25	45.986	31685	MS201900102_Con1.raw	F1		46	34	27	0.000750146	0.0004707	0.003811	1.43533e+06	45.94
	FALSE	High	[K].EVDEQMLNVQNK.[N]	1xOxidation [M6]		0.00694499	0.000581891	2	4	1	Q7TMM9; P99024	Q7TMM9 [325-336]; P99024 [325-336]	0	1462.68	0	100	Shared	High	High	0.0004707	0.005637	35	17.67	K.EVDEQMLNVQNK.N	[325-336]		Not Used
		Checked	Confidence	Identifying Node	PSM Ambiguity	Annotated Sequence	Modifications	# Protein Groups	# Proteins	Master Protein Accessions	Protein Accessions	# Missed Cleavages	Charge	DeltaScore	DeltaCn	Rank	Search Engine Rank	m/z [Da]	MH+ [Da]	Theo. MH+ [Da]	DeltaM [ppm]	Deltam/z [Da]	Activation Type	MS Order	Isolation Interference [%]	Ion Inject Time [ms]	RT [min]	First Scan	Spectrum File	File ID	Quan Info	Ions Score	Identity Strict	Identity Relaxed	Expectation Value	Percolator q-Value	Percolator PEP	Precursor Abundance	Apex RT [min]
		FALSE	High	Mascot (A5)	Unambiguous	[K].EVDEQmLNVQNK.[N]	M6(Oxidation)	2	4	Q7TMM9; P99024	Q7TMM9; P99024; P68372; Q9CWF2	0	2	1	0	1	1	731.852	1462.7	1462.68	8.44	0.00617	HCD (High Energy Collision Dissociation)	MS2	0	18.715	17.5198	6682	MS201900102_Con1.raw	F1		35	42	35	0.0639514	0.0004707	0.005637	16990002	17.67
	FALSE	High	[R].KLAVNMVPFPR.[L]			0.00317456	0.000581891	4	8	1	Q7TMM9; Q9D6F9; P99024; Q922F4	Q7TMM9 [252-262]; Q9D6F9 [252-262]; P99024 [252-262]; Q922F4 [252-262]	1	1271.73	0		No Quan Values	High	High	0.0004707	0.002517	56		R.KLAVNMVPFPR.L	[252-262]		Not Used
		Checked	Confidence	Identifying Node	PSM Ambiguity	Annotated Sequence	Modifications	# Protein Groups	# Proteins	Master Protein Accessions	Protein Accessions	# Missed Cleavages	Charge	DeltaScore	DeltaCn	Rank	Search Engine Rank	m/z [Da]	MH+ [Da]	Theo. MH+ [Da]	DeltaM [ppm]	Deltam/z [Da]	Activation Type	MS Order	Isolation Interference [%]	Ion Inject Time [ms]	RT [min]	First Scan	Spectrum File	File ID	Quan Info	Ions Score	Identity Strict	Identity Relaxed	Expectation Value	Percolator q-Value	Percolator PEP	Precursor Abundance	Apex RT [min]
		FALSE	High	Mascot (A5)	Unambiguous	[R].KLAVNMVPFPR.[L]		4	8	Q7TMM9; Q9D6F9; P99024; Q922F4	Q7TMM9; Q9D6F9; Q9ERD7; A2AQ07; P99024; P68372; Q9CWF2; Q922F4	1	2	0.8036	0	1	1	636.373	1271.74	1271.73	7.7	0.00489	HCD (High Energy Collision Dissociation)	MS2	0	12.963	32.1238	16924	MS201900102_Con1.raw	F1		56	37	30	0.000133761	0.0004707	0.002517	5.95369e+06	32.21
	FALSE	High	[R].AILVDLEPGTMDSVR.[S]	1xOxidation [M11]		0.0293656	0.000581891	2	4	2	Q7TMM9; P99024	Q7TMM9 [63-77]; P99024 [63-77]	0	1631.83	0	100	Shared	High	High	0.0004707	0.02499	25	38.6	R.AILVDLEPGTMDSVR.S	[63-77]		Not Used
		Checked	Confidence	Identifying Node	PSM Ambiguity	Annotated Sequence	Modifications	# Protein Groups	# Proteins	Master Protein Accessions	Protein Accessions	# Missed Cleavages	Charge	DeltaScore	DeltaCn	Rank	Search Engine Rank	m/z [Da]	MH+ [Da]	Theo. MH+ [Da]	DeltaM [ppm]	Deltam/z [Da]	Activation Type	MS Order	Isolation Interference [%]	Ion Inject Time [ms]	RT [min]	First Scan	Spectrum File	File ID	Quan Info	Ions Score	Identity Strict	Identity Relaxed	Expectation Value	Percolator q-Value	Percolator PEP	Precursor Abundance	Apex RT [min]
		FALSE	High	Mascot (A5)	Unambiguous	[R].AILVDLEPGTmDSVR.[S]	M11(Oxidation)	2	4	Q7TMM9; P99024	Q7TMM9; Q9ERD7; P99024; Q9CWF2	0	2	1	0	1	1	816.427	1631.85	1631.83	9.77	0.00798	HCD (High Energy Collision Dissociation)	MS2	37.1941	25	38.4054	22983	MS201900102_Con1.raw	F1		19	41	34	2.12083	0.0004707	0.0264	15949164	38.6
		FALSE	High	Mascot (A5)	Unambiguous	[R].AILVDLEPGTmDSVR.[S]	M11(Oxidation)	2	4	Q7TMM9; P99024	Q7TMM9; Q9ERD7; P99024; Q9CWF2	0	2	1	0	1	1	816.428	1631.85	1631.83	11.05	0.00901	HCD (High Energy Collision Dissociation)	MS2	56.1188	25	39.5298	24273	MS201900102_Con1.raw	F1		25	41	34	0.450785	0.0004707	0.02499	874591	39.73
	FALSE	High	[R].ISEQFTAMFR.[R]	1xOxidation [M8]		0.010684	0.000581891	3	6	1	Q7TMM9; Q9D6F9; P99024	Q7TMM9 [381-390]; Q9D6F9 [381-390]; P99024 [381-390]	0	1245.59	0	100	Shared	High	High	0.0004707	0.008789	22	31.2	R.ISEQFTAMFR.R	[381-390]		Not Used
		Checked	Confidence	Identifying Node	PSM Ambiguity	Annotated Sequence	Modifications	# Protein Groups	# Proteins	Master Protein Accessions	Protein Accessions	# Missed Cleavages	Charge	DeltaScore	DeltaCn	Rank	Search Engine Rank	m/z [Da]	MH+ [Da]	Theo. MH+ [Da]	DeltaM [ppm]	Deltam/z [Da]	Activation Type	MS Order	Isolation Interference [%]	Ion Inject Time [ms]	RT [min]	First Scan	Spectrum File	File ID	Quan Info	Ions Score	Identity Strict	Identity Relaxed	Expectation Value	Percolator q-Value	Percolator PEP	Precursor Abundance	Apex RT [min]
		FALSE	High	Mascot (A5)	Unambiguous	[R].ISEQFTAmFR.[R]	M8(Oxidation)	3	6	Q7TMM9; Q9D6F9; P99024	Q7TMM9; Q9D6F9; Q9ERD7; P99024; P68372; Q9CWF2	0	2	1	0	1	1	623.305	1245.6	1245.59	7.21	0.00449	HCD (High Energy Collision Dissociation)	MS2		6.509	31.0628	16009	MS201900102_Con1.raw	F1		22	41	34	0.832566	0.0004707	0.008789	10564331	31.2
FALSE	High	Master Protein	P02535	Keratin, type I cytoskeletal 10 OS=Mus musculus OX=10090 GN=Krt10 PE=1 SV=3	0	70.114	36	18	38	16	1	570	57.7	5.11	1012	18	cell differentiation;cell organization and biogenesis;response to stimulus		protein binding;structural molecule activity	Pf00038	16661		Krt10	11		Staphylococcus aureus infection	3	100	High
	Checked	Confidence	Annotated Sequence	Modifications	Modifications in Master Proteins	Qvality PEP	Qvality q-value	# Protein Groups	# Proteins	# PSMs	Master Protein Accessions	Positions in Master Proteins	# Missed Cleavages	Theo. MH+ [Da]	# Razor Quan Results	Abundances (Scaled): F1: Sample	Quan Info	Found in Sample: [S1] F1: Sample	Confidence (by Search Engine): Mascot	Percolator q-Value (by Search Engine): Mascot	Percolator PEP (by Search Engine): Mascot	Ions Score (by Search Engine): Mascot	Top Apex RT [min]	Sequence in Protein	Positions in Protein	Peptide Group Modifications in Protein	Quan Usage
	FALSE	High	[K].SDLEMQIESLNEELAYLKK.[N]	1xOxidation [M5]		3.72912e-06	0	1	1	2	P02535	P02535 [265-283]	1	2269.13	0	100		High	High	0	2.356e-06	63	62.38	K.SDLEMQIESLNEELAYLKK.N	[265-283]		Used
		Checked	Confidence	Identifying Node	PSM Ambiguity	Annotated Sequence	Modifications	# Protein Groups	# Proteins	Master Protein Accessions	Protein Accessions	# Missed Cleavages	Charge	DeltaScore	DeltaCn	Rank	Search Engine Rank	m/z [Da]	MH+ [Da]	Theo. MH+ [Da]	DeltaM [ppm]	Deltam/z [Da]	Activation Type	MS Order	Isolation Interference [%]	Ion Inject Time [ms]	RT [min]	First Scan	Spectrum File	File ID	Quan Info	Ions Score	Identity Strict	Identity Relaxed	Expectation Value	Percolator q-Value	Percolator PEP	Precursor Abundance	Apex RT [min]
		FALSE	High	Mascot (A5)	Unambiguous	[K].SDLEmQIESLNEELAYLKK.[N]	M5(Oxidation)	1	1	P02535	P02535	1	3	1	0	1	1	757.055	2269.15	2269.13	10.01	0.00757	HCD (High Energy Collision Dissociation)	MS2	48.991	25	62.2681	44905	MS201900102_Con1.raw	F1		63	43	36	9.96604e-05	0	2.356e-06	2.04448e+06	62.38
		FALSE	High	Mascot (A5)	Unambiguous	[K].SDLEmQIESLNEELAYLKK.[N]	M5(Oxidation)	1	1	P02535	P02535	1	3	1	0	1	1	757.054	2269.15	2269.13	9.12	0.0069	HCD (High Energy Collision Dissociation)	MS2	59.6589	25	62.7144	45382	MS201900102_Con1.raw	F1		53	43	36	0.00102558	0	2.849e-05	2.04448e+06	62.38
	FALSE	High	[K].SDLEMQIESLNEELAYLKK.[N]			2.14888e-05	0	1	1	1	P02535	P02535 [265-283]	1	2253.13	0	100		High	High	0	1.437e-05	50	62.54	K.SDLEMQIESLNEELAYLKK.N	[265-283]		Used
		Checked	Confidence	Identifying Node	PSM Ambiguity	Annotated Sequence	Modifications	# Protein Groups	# Proteins	Master Protein Accessions	Protein Accessions	# Missed Cleavages	Charge	DeltaScore	DeltaCn	Rank	Search Engine Rank	m/z [Da]	MH+ [Da]	Theo. MH+ [Da]	DeltaM [ppm]	Deltam/z [Da]	Activation Type	MS Order	Isolation Interference [%]	Ion Inject Time [ms]	RT [min]	First Scan	Spectrum File	File ID	Quan Info	Ions Score	Identity Strict	Identity Relaxed	Expectation Value	Percolator q-Value	Percolator PEP	Precursor Abundance	Apex RT [min]
		FALSE	High	Mascot (A5)	Unambiguous	[K].SDLEMQIESLNEELAYLKK.[N]		1	1	P02535	P02535	1	3	1	0	1	1	751.722	2253.15	2253.13	8.25	0.0062	HCD (High Energy Collision Dissociation)	MS2	59.3802	25	62.4132	45056	MS201900102_Con1.raw	F1		50	42	35	0.00217507	0	1.437e-05	1.81163e+06	62.54
	FALSE	High	[K].SKELTTEIDSNIEQMSSHK.[S]			4.50191e-07	0	1	1	3	P02535	P02535 [342-360]	1	2177.04	0		No Quan Values	High	High	0	2.645e-07	75		K.SKELTTEIDSNIEQMSSHK.S	[342-360]		Not Used
		Checked	Confidence	Identifying Node	PSM Ambiguity	Annotated Sequence	Modifications	# Protein Groups	# Proteins	Master Protein Accessions	Protein Accessions	# Missed Cleavages	Charge	DeltaScore	DeltaCn	Rank	Search Engine Rank	m/z [Da]	MH+ [Da]	Theo. MH+ [Da]	DeltaM [ppm]	Deltam/z [Da]	Activation Type	MS Order	Isolation Interference [%]	Ion Inject Time [ms]	RT [min]	First Scan	Spectrum File	File ID	Quan Info	Ions Score	Identity Strict	Identity Relaxed	Expectation Value	Percolator q-Value	Percolator PEP	Precursor Abundance	Apex RT [min]
		FALSE	High	Mascot (A5)	Unambiguous	[K].SKELTTEIDSNIEQMSSHK.[S]		1	1	P02535	P02535	1	3	1	0	1	1	726.363	2177.07	2177.04	16.23	0.01177	HCD (High Energy Collision Dissociation)	MS2	69.8015	25	30.0437	15141	MS201900102_Con1.raw	F1		61	44	37	0.000225489	0	2.137e-05
		FALSE	High	Mascot (A5)	Unambiguous	[K].SKELTTEIDSNIEQMSSHK.[S]		1	1	P02535	P02535	1	3	0.6364	0	1	1	726.36	2177.06	2177.04	11.85	0.0086	HCD (High Energy Collision Dissociation)	MS2	0	24.417	29.9582	15060	MS201900102_Con1.raw	F1		33	44	37	0.140973	0	0.0002146
		FALSE	High	Mascot (A5)	Unambiguous	[K].SKELTTEIDSNIEQMSSHK.[S]		1	1	P02535	P02535	1	3	0.9333	0	1	1	726.359	2177.06	2177.04	10.34	0.0075	HCD (High Energy Collision Dissociation)	MS2	0	24.373	30.007	15107	MS201900102_Con1.raw	F1		75	44	37	8.13681e-06	0	2.645e-07
	FALSE	High	[R].GSLGGGYSSGGFSGGSFSR.[G]			2.35988e-06	0	1	1	1	P02535	P02535 [33-51]	0	1723.77	0	100		High	High	0	1.462e-06	94	31.58	R.GSLGGGYSSGGFSGGSFSR.G	[33-51]		Used
		Checked	Confidence	Identifying Node	PSM Ambiguity	Annotated Sequence	Modifications	# Protein Groups	# Proteins	Master Protein Accessions	Protein Accessions	# Missed Cleavages	Charge	DeltaScore	DeltaCn	Rank	Search Engine Rank	m/z [Da]	MH+ [Da]	Theo. MH+ [Da]	DeltaM [ppm]	Deltam/z [Da]	Activation Type	MS Order	Isolation Interference [%]	Ion Inject Time [ms]	RT [min]	First Scan	Spectrum File	File ID	Quan Info	Ions Score	Identity Strict	Identity Relaxed	Expectation Value	Percolator q-Value	Percolator PEP	Precursor Abundance	Apex RT [min]
		FALSE	High	Mascot (A5)	Unambiguous	[R].GSLGGGYSSGGFSGGSFSR.[G]		1	1	P02535	P02535	0	2	1	0	1	1	862.395	1723.78	1723.77	8.97	0.00773	HCD (High Energy Collision Dissociation)	MS2	19.0195	25	31.4557	16342	MS201900102_Con1.raw	F1		94	43	36	9.72703e-08	0	1.462e-06	14223842	31.58
	FALSE	High	[R].SLLEGEGSSSGGGGGR.[R]			0.000115037	0	1	1	1	P02535	P02535 [449-464]	0	1406.65	0		No Quan Values	High	High	0	8.13e-05	75		R.SLLEGEGSSSGGGGGR.R	[449-464]		Not Used
		Checked	Confidence	Identifying Node	PSM Ambiguity	Annotated Sequence	Modifications	# Protein Groups	# Proteins	Master Protein Accessions	Protein Accessions	# Missed Cleavages	Charge	DeltaScore	DeltaCn	Rank	Search Engine Rank	m/z [Da]	MH+ [Da]	Theo. MH+ [Da]	DeltaM [ppm]	Deltam/z [Da]	Activation Type	MS Order	Isolation Interference [%]	Ion Inject Time [ms]	RT [min]	First Scan	Spectrum File	File ID	Quan Info	Ions Score	Identity Strict	Identity Relaxed	Expectation Value	Percolator q-Value	Percolator PEP	Precursor Abundance	Apex RT [min]
		FALSE	High	Mascot (A5)	Unambiguous	[R].SLLEGEGSSSGGGGGR.[R]		1	1	P02535	P02535	0	2	0.96	0	1	1	703.833	1406.66	1406.65	6.29	0.00442	HCD (High Energy Collision Dissociation)	MS2	0	8.349	16.9433	6227	MS201900102_Con1.raw	F1		75	42	35	4.98685e-06	0	8.13e-05	13813158	16.96
	FALSE	High	[K].SDLEMQIESLNEELAYLK.[K]	1xOxidation [M5]		0.000258569	0	1	1	2	P02535	P02535 [265-282]	0	2141.03	0	100		High	High	0	0.0001883	57	70.27	K.SDLEMQIESLNEELAYLK.K	[265-282]		Used
		Checked	Confidence	Identifying Node	PSM Ambiguity	Annotated Sequence	Modifications	# Protein Groups	# Proteins	Master Protein Accessions	Protein Accessions	# Missed Cleavages	Charge	DeltaScore	DeltaCn	Rank	Search Engine Rank	m/z [Da]	MH+ [Da]	Theo. MH+ [Da]	DeltaM [ppm]	Deltam/z [Da]	Activation Type	MS Order	Isolation Interference [%]	Ion Inject Time [ms]	RT [min]	First Scan	Spectrum File	File ID	Quan Info	Ions Score	Identity Strict	Identity Relaxed	Expectation Value	Percolator q-Value	Percolator PEP	Precursor Abundance	Apex RT [min]
		FALSE	High	Mascot (A5)	Unambiguous	[K].SDLEmQIESLNEELAYLK.[K]	M5(Oxidation)	1	1	P02535	P02535	0	2	0.9649	0	1	1	1071.03	2141.05	2141.03	9.32	0.00998	HCD (High Energy Collision Dissociation)	MS2	0	25	70.3748	53293	MS201900102_Con1.raw	F1		57	44	37	0.000561658	0	0.0001883	2.40011e+06	70.27
		FALSE	High	Mascot (A5)	Unambiguous	[K].SDLEmQIESLNEELAYLK.[K]	M5(Oxidation)	1	1	P02535	P02535	0	2	1	0	1	1	1071.03	2141.05	2141.03	7.84	0.00839	HCD (High Energy Collision Dissociation)	MS2	50.304	24.647	70.3109	53215	MS201900102_Con1.raw	F1		18	44	37	4.38444	0.0004707	0.012	2.40011e+06	70.27
	FALSE	High	[R].QSVEADINGLR.[R]			0.000161919	0	1	2	1	P02535	P02535 [244-254]	0	1201.62	0	100		High	High	0	0.0001157	68	27.48	R.QSVEADINGLR.R	[244-254]		Used
		Checked	Confidence	Identifying Node	PSM Ambiguity	Annotated Sequence	Modifications	# Protein Groups	# Proteins	Master Protein Accessions	Protein Accessions	# Missed Cleavages	Charge	DeltaScore	DeltaCn	Rank	Search Engine Rank	m/z [Da]	MH+ [Da]	Theo. MH+ [Da]	DeltaM [ppm]	Deltam/z [Da]	Activation Type	MS Order	Isolation Interference [%]	Ion Inject Time [ms]	RT [min]	First Scan	Spectrum File	File ID	Quan Info	Ions Score	Identity Strict	Identity Relaxed	Expectation Value	Percolator q-Value	Percolator PEP	Precursor Abundance	Apex RT [min]
		FALSE	High	Mascot (A5)	Unambiguous	[R].QSVEADINGLR.[R]		1	2	P02535	P08730; P02535	0	2	0.8088	0	1	1	601.317	1201.63	1201.62	8.41	0.00505	HCD (High Energy Collision Dissociation)	MS2	0	6.268	27.3774	13110	MS201900102_Con1.raw	F1		68	41	34	1.86389e-05	0	0.0001157	69805904	27.48
	FALSE	High	[K].QSLEASLAETEGR.[Y]			4.18655e-06	0	1	1	6	P02535	P02535 [385-397]	0	1390.68	0	100		High	High	0	2.648e-06	86	28.81	K.QSLEASLAETEGR.Y	[385-397]		Used
		Checked	Confidence	Identifying Node	PSM Ambiguity	Annotated Sequence	Modifications	# Protein Groups	# Proteins	Master Protein Accessions	Protein Accessions	# Missed Cleavages	Charge	DeltaScore	DeltaCn	Rank	Search Engine Rank	m/z [Da]	MH+ [Da]	Theo. MH+ [Da]	DeltaM [ppm]	Deltam/z [Da]	Activation Type	MS Order	Isolation Interference [%]	Ion Inject Time [ms]	RT [min]	First Scan	Spectrum File	File ID	Quan Info	Ions Score	Identity Strict	Identity Relaxed	Expectation Value	Percolator q-Value	Percolator PEP	Precursor Abundance	Apex RT [min]
		FALSE	High	Mascot (A5)	Unambiguous	[K].QSLEASLAETEGR.[Y]		1	1	P02535	P02535	0	2	0.8605	0	1	1	695.851	1390.69	1390.68	9.99	0.00694	HCD (High Energy Collision Dissociation)	MS2	23.6168	15.492	29.4675	14630	MS201900102_Con1.raw	F1		86	41	34	3.82154e-07	0	2.648e-06	196624608	28.81
		FALSE	High	Mascot (A5)	Unambiguous	[K].QSLEASLAETEGR.[Y]		1	1	P02535	P02535	0	2	0.8961	0	1	1	695.85	1390.69	1390.68	8.49	0.00591	HCD (High Energy Collision Dissociation)	MS2	13.3911	4.69	29.0398	14279	MS201900102_Con1.raw	F1		77	41	34	3.02161e-06	0	0.0002463	196624608	28.81
		FALSE	High	Mascot (A5)	Unambiguous	[K].QSLEASLAETEGR.[Y]		1	1	P02535	P02535	0	2	1	0	1	1	695.848	1390.69	1390.68	5.33	0.00371	HCD (High Energy Collision Dissociation)	MS2	33.2345	25	30.382	15448	MS201900102_Con1.raw	F1	Not Reliable	35	42	35	0.0486299	0	5.735e-05
		FALSE	High	Mascot (A5)	Unambiguous	[K].QSLEASLAETEGR.[Y]		1	1	P02535	P02535	0	2	1	0	1	1	695.847	1390.69	1390.68	4.54	0.00316	HCD (High Energy Collision Dissociation)	MS2	0	16.705	29.8919	14998	MS201900102_Con1.raw	F1	Not Reliable	56	42	35	0.000421879	0	1.601e-05
		FALSE	High	Mascot (A5)	Unambiguous	[K].QSLEASLAETEGR.[Y]		1	1	P02535	P02535	0	2	0.875	0	1	1	695.849	1390.69	1390.68	7.62	0.0053	HCD (High Energy Collision Dissociation)	MS2	17.9644	25	41.6018	26684	MS201900102_Con1.raw	F1		56	41	34	0.000425924	0.0004707	0.004205	5.03683e+06	41.73
		FALSE	High	Mascot (A5)	Unambiguous	[K].QSLEASLAETEGR.[Y]		1	1	P02535	P02535	0	2	1	0	1	1	695.847	1390.69	1390.68	4.63	0.00322	HCD (High Energy Collision Dissociation)	MS2	77.6424	25	42.1857	27379	MS201900102_Con1.raw	F1		20	42	35	1.58558	0.0004707	0.001826	5.03683e+06	41.73
	FALSE	High	[K].TIEDLKGQILTLTTDNANVLLQIDNAR.[L]			1.36703e-05	0	1	1	1	P02535	P02535 [200-226]	1	2982.61	0	100		High	High	0	9.016e-06	64	69.53	K.TIEDLKGQILTLTTDNANVLLQIDNAR.L	[200-226]		Used
		Checked	Confidence	Identifying Node	PSM Ambiguity	Annotated Sequence	Modifications	# Protein Groups	# Proteins	Master Protein Accessions	Protein Accessions	# Missed Cleavages	Charge	DeltaScore	DeltaCn	Rank	Search Engine Rank	m/z [Da]	MH+ [Da]	Theo. MH+ [Da]	DeltaM [ppm]	Deltam/z [Da]	Activation Type	MS Order	Isolation Interference [%]	Ion Inject Time [ms]	RT [min]	First Scan	Spectrum File	File ID	Quan Info	Ions Score	Identity Strict	Identity Relaxed	Expectation Value	Percolator q-Value	Percolator PEP	Precursor Abundance	Apex RT [min]
		FALSE	High	Mascot (A5)	Unambiguous	[K].TIEDLKGQILTLTTDNANVLLQIDNAR.[L]		1	1	P02535	P02535	1	3	1	0	1	1	994.882	2982.63	2982.61	7.07	0.00703	HCD (High Energy Collision Dissociation)	MS2	0	25	69.4645	52248	MS201900102_Con1.raw	F1		64	37	30	2.22692e-05	0	9.016e-06	2.07712e+06	69.53
	FALSE	High	[R].LENEIQTYR.[S]			0.00123265	0	1	1	1	P02535	P02535 [440-448]	0	1165.58	0	100		High	High	0	0.0009453	70	19.34	R.LENEIQTYR.S	[440-448]		Used
		Checked	Confidence	Identifying Node	PSM Ambiguity	Annotated Sequence	Modifications	# Protein Groups	# Proteins	Master Protein Accessions	Protein Accessions	# Missed Cleavages	Charge	DeltaScore	DeltaCn	Rank	Search Engine Rank	m/z [Da]	MH+ [Da]	Theo. MH+ [Da]	DeltaM [ppm]	Deltam/z [Da]	Activation Type	MS Order	Isolation Interference [%]	Ion Inject Time [ms]	RT [min]	First Scan	Spectrum File	File ID	Quan Info	Ions Score	Identity Strict	Identity Relaxed	Expectation Value	Percolator q-Value	Percolator PEP	Precursor Abundance	Apex RT [min]
		FALSE	High	Mascot (A5)	Unambiguous	[R].LENEIQTYR.[S]		1	1	P02535	P02535	0	2	0.6714	0	1	1	583.301	1165.6	1165.58	9.2	0.00536	HCD (High Energy Collision Dissociation)	MS2	0	25	19.2491	8645	MS201900102_Con1.raw	F1		70	41	34	1.36015e-05	0	0.0009453	393954784	19.34
	FALSE	High	[R].ALEESNYELEGK.[I]			0.001927	0	1	1	6	P02535	P02535 [164-175]	0	1381.65	0	100		High	High	0	0.001503	73	22.44	R.ALEESNYELEGK.I	[164-175]		Used
		Checked	Confidence	Identifying Node	PSM Ambiguity	Annotated Sequence	Modifications	# Protein Groups	# Proteins	Master Protein Accessions	Protein Accessions	# Missed Cleavages	Charge	DeltaScore	DeltaCn	Rank	Search Engine Rank	m/z [Da]	MH+ [Da]	Theo. MH+ [Da]	DeltaM [ppm]	Deltam/z [Da]	Activation Type	MS Order	Isolation Interference [%]	Ion Inject Time [ms]	RT [min]	First Scan	Spectrum File	File ID	Quan Info	Ions Score	Identity Strict	Identity Relaxed	Expectation Value	Percolator q-Value	Percolator PEP	Precursor Abundance	Apex RT [min]
		FALSE	High	Mascot (A5)	Unambiguous	[R].ALEESNYELEGK.[I]		1	1	P02535	P02535	0	2	1	0	1	1	691.334	1381.66	1381.65	8.89	0.00614	HCD (High Energy Collision Dissociation)	MS2	0	7.183	22.2067	10071	MS201900102_Con1.raw	F1		73	42	35	8.11921e-06	0	0.001503	468832832	22.44
		FALSE	High	Mascot (A5)	Unambiguous	[R].ALEESNYELEGK.[I]		1	1	P02535	P02535	0	2	1	0	1	1	691.33	1381.65	1381.65	3.15	0.00217	HCD (High Energy Collision Dissociation)	MS2	44.6081	15.519	24.3084	11196	MS201900102_Con1.raw	F1		2	42	35	110.999	0.0004707	0.01086	4489580	24.42
		FALSE	High	Mascot (A5)	Unambiguous	[R].ALEESNYELEGK.[I]		1	1	P02535	P02535	0	2	1	0	1	1	691.322	1381.64	1381.65	-8.07	-0.00558	HCD (High Energy Collision Dissociation)	MS2	25.3868	10.006	23.8236	10900	MS201900102_Con1.raw	F1		12	42	35	12.3324	0.0004707	0.03486	12839233	23.85
		FALSE	High	Mascot (A5)	Unambiguous	[R].ALEESNYELEGK.[I]		1	1	P02535	P02535	0	2	1	0	1	1	691.334	1381.66	1381.65	8.71	0.00602	HCD (High Energy Collision Dissociation)	MS2	0	8.934	23.4693	10699	MS201900102_Con1.raw	F1		11	42	35	14.7745	0.0004707	0.007275	68394864	22.93
		FALSE	High	Mascot (A5)	Unambiguous	[R].ALEESNYELEGK.[I]		1	1	P02535	P02535	0	2	1	0	1	1	691.334	1381.66	1381.65	8.54	0.0059	HCD (High Energy Collision Dissociation)	MS2	0	1.21	22.6265	10270	MS201900102_Con1.raw	F1		48	42	35	0.00290077	0.0004707	0.003796	468832832	22.44
		FALSE	High	Mascot (A5)	Unambiguous	[R].ALEESNYELEGK.[I]		1	1	P02535	P02535	0	2	0.95	0	1	1	691.333	1381.66	1381.65	8.09	0.00559	HCD (High Energy Collision Dissociation)	MS2	0	4.323	23.0459	10485	MS201900102_Con1.raw	F1		20	42	35	1.94539	0.0004707	0.01553	68394864	22.93
	FALSE	High	[R].ALEESNYELEGK.[I]	1xAcetyl [N-Term]	P02535 1xAcetyl [N-Term]	0.000998865	0	1	1	1	P02535	P02535 [164-175]	0	1423.66	0		No Quan Values	High	High	0	0.0007599	36		R.ALEESNYELEGK.I	[164-175]	1xAcetyl [N-Term]	Not Used
		Checked	Confidence	Identifying Node	PSM Ambiguity	Annotated Sequence	Modifications	# Protein Groups	# Proteins	Master Protein Accessions	Protein Accessions	# Missed Cleavages	Charge	DeltaScore	DeltaCn	Rank	Search Engine Rank	m/z [Da]	MH+ [Da]	Theo. MH+ [Da]	DeltaM [ppm]	Deltam/z [Da]	Activation Type	MS Order	Isolation Interference [%]	Ion Inject Time [ms]	RT [min]	First Scan	Spectrum File	File ID	Quan Info	Ions Score	Identity Strict	Identity Relaxed	Expectation Value	Percolator q-Value	Percolator PEP	Precursor Abundance	Apex RT [min]
		FALSE	High	Mascot (A5)	Unambiguous	[R].aLEESNYELEGK.[I]	N-Term(Acetyl)	1	1	P02535	P02535	0	2	0.9167	0	1	1	712.34	1423.67	1423.66	9.44	0.00672	HCD (High Energy Collision Dissociation)	MS2	0	25	28.5201	13856	MS201900102_Con1.raw	F1		36	42	35	0.047861	0	0.0007599
	FALSE	High	[K].YENEVTLR.[Q]			0.0147936	0.000581891	1	1	1	P02535	P02535 [236-243]	0	1023.51	0	100		High	High	0.0004707	0.01235	37	18.25	K.YENEVTLR.Q	[236-243]		Used
		Checked	Confidence	Identifying Node	PSM Ambiguity	Annotated Sequence	Modifications	# Protein Groups	# Proteins	Master Protein Accessions	Protein Accessions	# Missed Cleavages	Charge	DeltaScore	DeltaCn	Rank	Search Engine Rank	m/z [Da]	MH+ [Da]	Theo. MH+ [Da]	DeltaM [ppm]	Deltam/z [Da]	Activation Type	MS Order	Isolation Interference [%]	Ion Inject Time [ms]	RT [min]	First Scan	Spectrum File	File ID	Quan Info	Ions Score	Identity Strict	Identity Relaxed	Expectation Value	Percolator q-Value	Percolator PEP	Precursor Abundance	Apex RT [min]
		FALSE	High	Mascot (A5)	Unambiguous	[K].YENEVTLR.[Q]		1	1	P02535	P02535	0	2	0.3243	0	1	1	512.264	1023.52	1023.51	9.06	0.00464	HCD (High Energy Collision Dissociation)	MS2	84.9093	21.702	18.1688	7408	MS201900102_Con1.raw	F1		37	40	33	0.0231408	0.0004707	0.01235	4.03583e+06	18.25
	FALSE	High	[KR].VTMQNLNDR.[L]	1xAcetyl [N-Term]; 1xOxidation [M3]	Q9Z2K1 1xAcetyl [N-Term]; Q61414 1xAcetyl [N-Term]; P02535 1xAcetyl [N-Term]; Q61781 1xAcetyl [N-Term]	0.0069086	0.000581891	4	6	1	Q9Z2K1; Q61414; P02535; Q61781	Q9Z2K1 [115-123]; Q61414 [100-108]; P02535 [146-154]; Q61781 [123-131]	0	1148.54	0		No Quan Values	High	High	0.0004707	0.005599	34		R.VTMQNLNDR.L	[146-154]	1xAcetyl [N-Term]	Not Used
		Checked	Confidence	Identifying Node	PSM Ambiguity	Annotated Sequence	Modifications	# Protein Groups	# Proteins	Master Protein Accessions	Protein Accessions	# Missed Cleavages	Charge	DeltaScore	DeltaCn	Rank	Search Engine Rank	m/z [Da]	MH+ [Da]	Theo. MH+ [Da]	DeltaM [ppm]	Deltam/z [Da]	Activation Type	MS Order	Isolation Interference [%]	Ion Inject Time [ms]	RT [min]	First Scan	Spectrum File	File ID	Quan Info	Ions Score	Identity Strict	Identity Relaxed	Expectation Value	Percolator q-Value	Percolator PEP	Precursor Abundance	Apex RT [min]
		FALSE	High	Mascot (A5)	Unambiguous	[KR].vTmQNLNDR.[L]	N-Term(Acetyl); M3(Oxidation)	4	6	Q9Z2K1; Q61414; P02535; Q61781	Q9Z2K1; Q8VCW2; Q61414; Q9Z320; P02535; Q61781	0	2	0.8235	0	1	1	574.777	1148.55	1148.54	9.12	0.00524	HCD (High Energy Collision Dissociation)	MS2	21.667	25	16.0529	5830	MS201900102_Con1.raw	F1		34	41	34	0.0520097	0.0004707	0.005599
	FALSE	High	[KR].VTMQNLNDR.[L]	1xOxidation [M3]		0.0238293	0.000581891	4	6	1	Q9Z2K1; Q61414; P02535; Q61781	Q9Z2K1 [115-123]; Q61414 [100-108]; P02535 [146-154]; Q61781 [123-131]	0	1106.53	0	100	Shared	High	High	0.0004707	0.02012	43	14.54	R.VTMQNLNDR.L	[146-154]		Used
		Checked	Confidence	Identifying Node	PSM Ambiguity	Annotated Sequence	Modifications	# Protein Groups	# Proteins	Master Protein Accessions	Protein Accessions	# Missed Cleavages	Charge	DeltaScore	DeltaCn	Rank	Search Engine Rank	m/z [Da]	MH+ [Da]	Theo. MH+ [Da]	DeltaM [ppm]	Deltam/z [Da]	Activation Type	MS Order	Isolation Interference [%]	Ion Inject Time [ms]	RT [min]	First Scan	Spectrum File	File ID	Quan Info	Ions Score	Identity Strict	Identity Relaxed	Expectation Value	Percolator q-Value	Percolator PEP	Precursor Abundance	Apex RT [min]
		FALSE	High	Mascot (A5)	Unambiguous	[KR].VTmQNLNDR.[L]	M3(Oxidation)	4	6	Q9Z2K1; Q61414; P02535; Q61781	Q9Z2K1; Q8VCW2; Q61414; Q9Z320; P02535; Q61781	0	2	0.907	0	1	1	553.771	1106.54	1106.53	8.86	0.0049	HCD (High Energy Collision Dissociation)	MS2	21.1778	25	14.4408	3943	MS201900102_Con1.raw	F1		43	40	33	0.00561053	0.0004707	0.02012	7.99921e+06	14.54
	FALSE	High	[KR].VTMQNLNDR.[L]			0.0185348	0.000581891	4	6	1	Q9Z2K1; Q61414; P02535; Q61781	Q9Z2K1 [115-123]; Q61414 [100-108]; P02535 [146-154]; Q61781 [123-131]	0	1090.53	0	100	Shared	High	High	0.0004707	0.01557	54	16.94	R.VTMQNLNDR.L	[146-154]		Used
		Checked	Confidence	Identifying Node	PSM Ambiguity	Annotated Sequence	Modifications	# Protein Groups	# Proteins	Master Protein Accessions	Protein Accessions	# Missed Cleavages	Charge	DeltaScore	DeltaCn	Rank	Search Engine Rank	m/z [Da]	MH+ [Da]	Theo. MH+ [Da]	DeltaM [ppm]	Deltam/z [Da]	Activation Type	MS Order	Isolation Interference [%]	Ion Inject Time [ms]	RT [min]	First Scan	Spectrum File	File ID	Quan Info	Ions Score	Identity Strict	Identity Relaxed	Expectation Value	Percolator q-Value	Percolator PEP	Precursor Abundance	Apex RT [min]
		FALSE	High	Mascot (A5)	Unambiguous	[KR].VTMQNLNDR.[L]		4	6	Q9Z2K1; Q61414; P02535; Q61781	Q9Z2K1; Q8VCW2; Q61414; Q9Z320; P02535; Q61781	0	2	0.6111	0	1	1	545.773	1090.54	1090.53	7.13	0.00389	HCD (High Energy Collision Dissociation)	MS2	0	4.589	16.9038	6203	MS201900102_Con1.raw	F1		54	41	34	0.000491194	0.0004707	0.01557	90606664	16.94
	FALSE	High	[R].LKYENEVTLR.[Q]			0.00506718	0.000581891	1	1	1	P02535	P02535 [234-243]	1	1264.69	0		No Quan Values	High	High	0.0004707	0.004073	50		R.LKYENEVTLR.Q	[234-243]		Not Used
		Checked	Confidence	Identifying Node	PSM Ambiguity	Annotated Sequence	Modifications	# Protein Groups	# Proteins	Master Protein Accessions	Protein Accessions	# Missed Cleavages	Charge	DeltaScore	DeltaCn	Rank	Search Engine Rank	m/z [Da]	MH+ [Da]	Theo. MH+ [Da]	DeltaM [ppm]	Deltam/z [Da]	Activation Type	MS Order	Isolation Interference [%]	Ion Inject Time [ms]	RT [min]	First Scan	Spectrum File	File ID	Quan Info	Ions Score	Identity Strict	Identity Relaxed	Expectation Value	Percolator q-Value	Percolator PEP	Precursor Abundance	Apex RT [min]
		FALSE	High	Mascot (A5)	Unambiguous	[R].LKYENEVTLR.[Q]		1	1	P02535	P02535	1	2	0.82	0	1	1	632.854	1264.7	1264.69	9.01	0.0057	HCD (High Energy Collision Dissociation)	MS2	0	5.875	19.301	8702	MS201900102_Con1.raw	F1		50	38	31	0.000683984	0.0004707	0.004073	20107036	19.31
	FALSE	High	[R].VLDELTLSK.[S]			0.0569925	0.00154131	1	1	1	P02535	P02535 [256-264]	0	1017.58	0	100		High	High	0.001254	0.04964	24	29.17	R.VLDELTLSK.S	[256-264]		Used
		Checked	Confidence	Identifying Node	PSM Ambiguity	Annotated Sequence	Modifications	# Protein Groups	# Proteins	Master Protein Accessions	Protein Accessions	# Missed Cleavages	Charge	DeltaScore	DeltaCn	Rank	Search Engine Rank	m/z [Da]	MH+ [Da]	Theo. MH+ [Da]	DeltaM [ppm]	Deltam/z [Da]	Activation Type	MS Order	Isolation Interference [%]	Ion Inject Time [ms]	RT [min]	First Scan	Spectrum File	File ID	Quan Info	Ions Score	Identity Strict	Identity Relaxed	Expectation Value	Percolator q-Value	Percolator PEP	Precursor Abundance	Apex RT [min]
		FALSE	High	Mascot (A5)	Unambiguous	[R].VLDELTLSK.[S]		1	1	P02535	P02535	0	2	1	0	1	1	509.299	1017.59	1017.58	7.23	0.00368	HCD (High Energy Collision Dissociation)	MS2	42.1704	20.782	28.9988	14239	MS201900102_Con1.raw	F1		24	37	30	0.201911	0.001254	0.04964	12890497	29.17
	FALSE	High	[RK].LAADDFR.[TLVMS]			0.0511585	0.00154131	9	17	2	Q9Z2K1; B1AQ75; Q61765; Q6IFX2; P05784; Q61414; P02535; Q61781; Q9QWL7	Q9Z2K1 [193-199]; B1AQ75 [173-179]; Q61765 [136-142]; Q6IFX2 [174-180]; P05784 [152-158]; Q61414 [179-185]; P02535 [227-233]; Q61781 [201-207]; Q9QWL7 [164-170]	0	807.4	0	100	Shared	High	High	0.00167	0.07655	48	19.14	R.LAADDFR.L	[227-233]		Used
		Checked	Confidence	Identifying Node	PSM Ambiguity	Annotated Sequence	Modifications	# Protein Groups	# Proteins	Master Protein Accessions	Protein Accessions	# Missed Cleavages	Charge	DeltaScore	DeltaCn	Rank	Search Engine Rank	m/z [Da]	MH+ [Da]	Theo. MH+ [Da]	DeltaM [ppm]	Deltam/z [Da]	Activation Type	MS Order	Isolation Interference [%]	Ion Inject Time [ms]	RT [min]	First Scan	Spectrum File	File ID	Quan Info	Ions Score	Identity Strict	Identity Relaxed	Expectation Value	Percolator q-Value	Percolator PEP	Precursor Abundance	Apex RT [min]
		FALSE	High	Mascot (A5)	Unambiguous	[RK].LAADDFR.[TLVMS]		9	17	Q9Z2K1; B1AQ75; Q61765; Q6IFX2; P05784; Q61414; P02535; Q61781; Q9QWL7	Q9Z2K1; B1AQ75; Q61765; Q6IFX2; Q497I4; P08730; P05784; Q62168; A1L317; Q61897; Q61414; P02535; P19001; Q61781; Q6IFX3; A6BLY7; Q9QWL7	0	2	0.76	0	1	1	404.207	807.406	807.4	8.29	0.00335	HCD (High Energy Collision Dissociation)	MS2		25	17.8183	7004	MS201900102_Con1.raw	F1		25	34	27	0.0818045	0.001254	0.04436	3.02384e+06	17.87
		FALSE	High	Mascot (A5)	Unambiguous	[RK].LAADDFR.[TLVMS]		9	17	Q9Z2K1; B1AQ75; Q61765; Q6IFX2; P05784; Q61414; P02535; Q61781; Q9QWL7	Q9Z2K1; B1AQ75; Q61765; Q6IFX2; Q497I4; P08730; P05784; Q62168; A1L317; Q61897; Q61414; P02535; P19001; Q61781; Q6IFX3; A6BLY7; Q9QWL7	0	2	0.8125	0	1	1	404.206	807.406	807.4	7.53	0.00304	HCD (High Energy Collision Dissociation)	MS2	25.2906	25	18.9383	8291	MS201900102_Con1.raw	F1		48	34	27	0.000417388	0.00167	0.07655	401354336	19.14
	FALSE	High	[R].QSVEADINGLRR.[V]			0.0602993	0.00154131	1	2	2	P02535	P02535 [244-255]	1	1357.72	0	100		High	High	0.002413	0.08022	28	22.08	R.QSVEADINGLRR.V	[244-255]		Used
		Checked	Confidence	Identifying Node	PSM Ambiguity	Annotated Sequence	Modifications	# Protein Groups	# Proteins	Master Protein Accessions	Protein Accessions	# Missed Cleavages	Charge	DeltaScore	DeltaCn	Rank	Search Engine Rank	m/z [Da]	MH+ [Da]	Theo. MH+ [Da]	DeltaM [ppm]	Deltam/z [Da]	Activation Type	MS Order	Isolation Interference [%]	Ion Inject Time [ms]	RT [min]	First Scan	Spectrum File	File ID	Quan Info	Ions Score	Identity Strict	Identity Relaxed	Expectation Value	Percolator q-Value	Percolator PEP	Precursor Abundance	Apex RT [min]
		FALSE	High	Mascot (A5)	Unambiguous	[R].QSVEADINGLRR.[V]		1	2	P02535	P08730; P02535	1	2	1	0	1	1	679.37	1357.73	1357.72	10.74	0.00729	HCD (High Energy Collision Dissociation)	MS2	55.1577	11.399	22.3195	10117	MS201900102_Con1.raw	F1		23	40	33	0.531622	0.001254	0.05264	91479912	22.08
		FALSE	High	Mascot (A5)	Unambiguous	[R].QSVEADINGLRR.[V]		1	2	P02535	P08730; P02535	1	2	0.8929	0	1	1	679.368	1357.73	1357.72	7.77	0.00528	HCD (High Energy Collision Dissociation)	MS2	50.8565	7.793	21.8902	9917	MS201900102_Con1.raw	F1		28	40	33	0.172645	0.002413	0.08022	91479912	22.08
	FALSE	High	[R].TVQGLEIELQSQLALK.[Q]			0.0937146	0.0029762	1	1	1	P02535	P02535 [369-384]	0	1770	0		No Quan Values	High	High	0.002413	0.08302	1		R.TVQGLEIELQSQLALK.Q	[369-384]		Not Used
		Checked	Confidence	Identifying Node	PSM Ambiguity	Annotated Sequence	Modifications	# Protein Groups	# Proteins	Master Protein Accessions	Protein Accessions	# Missed Cleavages	Charge	DeltaScore	DeltaCn	Rank	Search Engine Rank	m/z [Da]	MH+ [Da]	Theo. MH+ [Da]	DeltaM [ppm]	Deltam/z [Da]	Activation Type	MS Order	Isolation Interference [%]	Ion Inject Time [ms]	RT [min]	First Scan	Spectrum File	File ID	Quan Info	Ions Score	Identity Strict	Identity Relaxed	Expectation Value	Percolator q-Value	Percolator PEP	Precursor Abundance	Apex RT [min]
		FALSE	High	Mascot (A5)	Unambiguous	[R].TVQGLEIELQSQLALK.[Q]		1	1	P02535	P02535	0	2	1	0	1	1	885.509	1770.01	1770	5.61	0.00496	HCD (High Energy Collision Dissociation)	MS2	28.8385	25	56.2826	38986	MS201900102_Con1.raw	F1		1	35	28	25.0102	0.002413	0.08302
	FALSE	High	[K].DAEEWFNQK.[S]			0.168178	0.00519599	1	1	1	P02535	P02535 [333-341]	0	1166.51	0	100		High	High	0.004207	0.1517	36	32.72	K.DAEEWFNQK.S	[333-341]		Used
		Checked	Confidence	Identifying Node	PSM Ambiguity	Annotated Sequence	Modifications	# Protein Groups	# Proteins	Master Protein Accessions	Protein Accessions	# Missed Cleavages	Charge	DeltaScore	DeltaCn	Rank	Search Engine Rank	m/z [Da]	MH+ [Da]	Theo. MH+ [Da]	DeltaM [ppm]	Deltam/z [Da]	Activation Type	MS Order	Isolation Interference [%]	Ion Inject Time [ms]	RT [min]	First Scan	Spectrum File	File ID	Quan Info	Ions Score	Identity Strict	Identity Relaxed	Expectation Value	Percolator q-Value	Percolator PEP	Precursor Abundance	Apex RT [min]
		FALSE	High	Mascot (A5)	Unambiguous	[K].DAEEWFNQK.[S]		1	1	P02535	P02535	0	2	0.75	0	1	1	583.764	1166.52	1166.51	7.64	0.00446	HCD (High Energy Collision Dissociation)	MS2	0	25	32.6192	17352	MS201900102_Con1.raw	F1		36	40	33	0.0326932	0.004207	0.1517	8.14239e+06	32.72
FALSE	High	Master Protein	Q8VDD5	Myosin-9 OS=Mus musculus OX=10090 GN=Myh9 PE=1 SV=4	0	67.24	14	20	20	17	1	1960	226.2	5.66	608	20	cell differentiation;cell organization and biogenesis;cellular component movement;metabolic process;regulation of biological process;transport	cytoplasm;cytoskeleton;cytosol;extracellular;membrane;nucleus	catalytic activity;motor activity;nucleotide binding;protein binding;RNA binding;transporter activity	Pf00063, Pf01442, Pf01496, Pf01576, Pf01765, Pf02463, Pf02736, Pf03962, Pf04111, Pf04156, Pf05667, Pf05911, Pf06160, Pf06637, Pf07111, Pf07888, Pf08317, Pf09726, Pf09731, Pf10498, Pf11559, Pf11917, Pf12128, Pf13094, Pf13166	17886	ENSMUSG00000022443.16	Myh9	15	Primary Focal Segmental Glomerulosclerosis FSGS	Regulation of actin cytoskeleton; Tight junction	1	100	High
	Checked	Confidence	Annotated Sequence	Modifications	Modifications in Master Proteins	Qvality PEP	Qvality q-value	# Protein Groups	# Proteins	# PSMs	Master Protein Accessions	Positions in Master Proteins	# Missed Cleavages	Theo. MH+ [Da]	# Razor Quan Results	Abundances (Scaled): F1: Sample	Quan Info	Found in Sample: [S1] F1: Sample	Confidence (by Search Engine): Mascot	Percolator q-Value (by Search Engine): Mascot	Percolator PEP (by Search Engine): Mascot	Ions Score (by Search Engine): Mascot	Top Apex RT [min]	Sequence in Protein	Positions in Protein	Peptide Group Modifications in Protein	Quan Usage
	FALSE	High	[R].IAQLEEELEEEQGNTELINDR.[L]			3.98497e-08	0	1	1	1	Q8VDD5	Q8VDD5 [1731-1751]	0	2472.17	0		No Quan Values	High	High	0	2.156e-08	123		R.IAQLEEELEEEQGNTELINDR.L	[1731-1751]		Not Used
		Checked	Confidence	Identifying Node	PSM Ambiguity	Annotated Sequence	Modifications	# Protein Groups	# Proteins	Master Protein Accessions	Protein Accessions	# Missed Cleavages	Charge	DeltaScore	DeltaCn	Rank	Search Engine Rank	m/z [Da]	MH+ [Da]	Theo. MH+ [Da]	DeltaM [ppm]	Deltam/z [Da]	Activation Type	MS Order	Isolation Interference [%]	Ion Inject Time [ms]	RT [min]	First Scan	Spectrum File	File ID	Quan Info	Ions Score	Identity Strict	Identity Relaxed	Expectation Value	Percolator q-Value	Percolator PEP	Precursor Abundance	Apex RT [min]
		FALSE	High	Mascot (A5)	Unambiguous	[R].IAQLEEELEEEQGNTELINDR.[L]		1	1	Q8VDD5	Q8VDD5	0	2	0.9919	0	1	1	1236.61	2472.2	2472.17	12.15	0.01501	HCD (High Energy Collision Dissociation)	MS2	0	25	47.1045	32981	MS201900102_Con1.raw	F1		123	45	38	1.63994e-10	0	2.156e-08
	FALSE	High	[K].IAQLEEQLDNETK.[E]			5.68551e-05	0	1	1	1	Q8VDD5	Q8VDD5 [1816-1828]	0	1530.76	0		No Quan Values	High	High	0	3.94e-05	91		K.IAQLEEQLDNETK.E	[1816-1828]		Not Used
		Checked	Confidence	Identifying Node	PSM Ambiguity	Annotated Sequence	Modifications	# Protein Groups	# Proteins	Master Protein Accessions	Protein Accessions	# Missed Cleavages	Charge	DeltaScore	DeltaCn	Rank	Search Engine Rank	m/z [Da]	MH+ [Da]	Theo. MH+ [Da]	DeltaM [ppm]	Deltam/z [Da]	Activation Type	MS Order	Isolation Interference [%]	Ion Inject Time [ms]	RT [min]	First Scan	Spectrum File	File ID	Quan Info	Ions Score	Identity Strict	Identity Relaxed	Expectation Value	Percolator q-Value	Percolator PEP	Precursor Abundance	Apex RT [min]
		FALSE	High	Mascot (A5)	Unambiguous	[K].IAQLEEQLDNETK.[E]		1	1	Q8VDD5	Q8VDD5	0	2	0.8132	0	1	1	765.893	1530.78	1530.76	8.68	0.00664	HCD (High Energy Collision Dissociation)	MS2	0	25	28.0183	13507	MS201900102_Con1.raw	F1		91	41	34	1.33269e-07	0	3.94e-05	5142976	28.05
	FALSE	High	[KR].QLLQANPILEAFGNAK.[T]			1.47925e-05	0	2	3	1	O08638; Q8VDD5	O08638 [217-232]; Q8VDD5 [210-225]	0	1726.95	0		No Quan Values	High	High	0	9.777e-06	79		R.QLLQANPILEAFGNAK.T	[210-225]		Not Used
		Checked	Confidence	Identifying Node	PSM Ambiguity	Annotated Sequence	Modifications	# Protein Groups	# Proteins	Master Protein Accessions	Protein Accessions	# Missed Cleavages	Charge	DeltaScore	DeltaCn	Rank	Search Engine Rank	m/z [Da]	MH+ [Da]	Theo. MH+ [Da]	DeltaM [ppm]	Deltam/z [Da]	Activation Type	MS Order	Isolation Interference [%]	Ion Inject Time [ms]	RT [min]	First Scan	Spectrum File	File ID	Quan Info	Ions Score	Identity Strict	Identity Relaxed	Expectation Value	Percolator q-Value	Percolator PEP	Precursor Abundance	Apex RT [min]
		FALSE	High	Mascot (A5)	Unambiguous	[KR].QLLQANPILEAFGNAK.[T]		2	3	O08638; Q8VDD5	O08638; Q8VDD5; Q6URW6	0	2	0.9747	0	1	1	863.983	1726.96	1726.95	6.23	0.00538	HCD (High Energy Collision Dissociation)	MS2	0	25	56.686	39290	MS201900102_Con1.raw	F1		79	38	31	8.19575e-07	0	9.777e-06	1.34774e+06	56.69
	FALSE	High	[K].DFSALESQLQDTQELLQEENR.[Q]			8.48129e-10	0	1	1	1	Q8VDD5	Q8VDD5 [1302-1322]	0	2493.17	0	100		High	High	0	4.034e-10	118	69.14	K.DFSALESQLQDTQELLQEENR.Q	[1302-1322]		Used
		Checked	Confidence	Identifying Node	PSM Ambiguity	Annotated Sequence	Modifications	# Protein Groups	# Proteins	Master Protein Accessions	Protein Accessions	# Missed Cleavages	Charge	DeltaScore	DeltaCn	Rank	Search Engine Rank	m/z [Da]	MH+ [Da]	Theo. MH+ [Da]	DeltaM [ppm]	Deltam/z [Da]	Activation Type	MS Order	Isolation Interference [%]	Ion Inject Time [ms]	RT [min]	First Scan	Spectrum File	File ID	Quan Info	Ions Score	Identity Strict	Identity Relaxed	Expectation Value	Percolator q-Value	Percolator PEP	Precursor Abundance	Apex RT [min]
		FALSE	High	Mascot (A5)	Unambiguous	[K].DFSALESQLQDTQELLQEENR.[Q]		1	1	Q8VDD5	Q8VDD5	0	2	0.9831	0	1	1	1247.1	2493.19	2493.17	7.8	0.00972	HCD (High Energy Collision Dissociation)	MS2	0	25	69.1237	51857	MS201900102_Con1.raw	F1		118	45	38	6.601e-10	0	4.034e-10	942209	69.14
	FALSE	High	[K].VIQYLAHVASSHK.[SG]			0.000894446	0	1	2	1	Q8VDD5	Q8VDD5 [187-199]	0	1452.8	0	100		High	High	0	0.0006767	51	18.03	K.VIQYLAHVASSHK.S	[187-199]		Used
		Checked	Confidence	Identifying Node	PSM Ambiguity	Annotated Sequence	Modifications	# Protein Groups	# Proteins	Master Protein Accessions	Protein Accessions	# Missed Cleavages	Charge	DeltaScore	DeltaCn	Rank	Search Engine Rank	m/z [Da]	MH+ [Da]	Theo. MH+ [Da]	DeltaM [ppm]	Deltam/z [Da]	Activation Type	MS Order	Isolation Interference [%]	Ion Inject Time [ms]	RT [min]	First Scan	Spectrum File	File ID	Quan Info	Ions Score	Identity Strict	Identity Relaxed	Expectation Value	Percolator q-Value	Percolator PEP	Precursor Abundance	Apex RT [min]
		FALSE	High	Mascot (A5)	Unambiguous	[K].VIQYLAHVASSHK.[SG]		1	2	Q8VDD5	Q8VDD5; Q61879	0	3	1	0	1	1	484.941	1452.81	1452.8	8.18	0.00396	HCD (High Energy Collision Dissociation)	MS2	35.3823	25	17.9999	7212	MS201900102_Con1.raw	F1		51	37	30	0.000488141	0	0.0006767	2.11593e+06	18.03
	FALSE	High	[K].VSHLLGINVTDFTR.[G]			0.000913457	0	1	1	1	Q8VDD5	Q8VDD5 [374-387]	0	1571.85	0	100		High	High	0	0.0006938	67	40.85	K.VSHLLGINVTDFTR.G	[374-387]		Used
		Checked	Confidence	Identifying Node	PSM Ambiguity	Annotated Sequence	Modifications	# Protein Groups	# Proteins	Master Protein Accessions	Protein Accessions	# Missed Cleavages	Charge	DeltaScore	DeltaCn	Rank	Search Engine Rank	m/z [Da]	MH+ [Da]	Theo. MH+ [Da]	DeltaM [ppm]	Deltam/z [Da]	Activation Type	MS Order	Isolation Interference [%]	Ion Inject Time [ms]	RT [min]	First Scan	Spectrum File	File ID	Quan Info	Ions Score	Identity Strict	Identity Relaxed	Expectation Value	Percolator q-Value	Percolator PEP	Precursor Abundance	Apex RT [min]
		FALSE	High	Mascot (A5)	Unambiguous	[K].VSHLLGINVTDFTR.[G]		1	1	Q8VDD5	Q8VDD5	0	3	0.9403	0	1	1	524.626	1571.86	1571.85	6.07	0.00318	HCD (High Energy Collision Dissociation)	MS2	38.7968	25	40.7424	25729	MS201900102_Con1.raw	F1		67	39	32	1.95419e-05	0	0.0006938	1.91993e+06	40.85
	FALSE	High	[K].ANLQIDQINTDLNLER.[S]			1.35137e-06	0	1	1	1	Q8VDD5	Q8VDD5 [1755-1770]	0	1869.97	0		No Quan Values	High	High	0	8.245e-07	94		K.ANLQIDQINTDLNLER.S	[1755-1770]		Not Used
		Checked	Confidence	Identifying Node	PSM Ambiguity	Annotated Sequence	Modifications	# Protein Groups	# Proteins	Master Protein Accessions	Protein Accessions	# Missed Cleavages	Charge	DeltaScore	DeltaCn	Rank	Search Engine Rank	m/z [Da]	MH+ [Da]	Theo. MH+ [Da]	DeltaM [ppm]	Deltam/z [Da]	Activation Type	MS Order	Isolation Interference [%]	Ion Inject Time [ms]	RT [min]	First Scan	Spectrum File	File ID	Quan Info	Ions Score	Identity Strict	Identity Relaxed	Expectation Value	Percolator q-Value	Percolator PEP	Precursor Abundance	Apex RT [min]
		FALSE	High	Mascot (A5)	Unambiguous	[K].ANLQIDQINTDLNLER.[S]		1	1	Q8VDD5	Q8VDD5	0	2	1	0	1	1	935.494	1869.98	1869.97	7.25	0.00677	HCD (High Energy Collision Dissociation)	MS2	0	25	45.0064	30573	MS201900102_Con1.raw	F1		94	41	34	5.61225e-08	0	8.245e-07	2755463	45.13
	FALSE	High	[R].ELETQISELQEDLESER.[A]			0.000952699	0	1	1	1	Q8VDD5	Q8VDD5 [1108-1124]	0	2047.97	0		No Quan Values	High	High	0	0.0007257	22		R.ELETQISELQEDLESER.A	[1108-1124]		Not Used
		Checked	Confidence	Identifying Node	PSM Ambiguity	Annotated Sequence	Modifications	# Protein Groups	# Proteins	Master Protein Accessions	Protein Accessions	# Missed Cleavages	Charge	DeltaScore	DeltaCn	Rank	Search Engine Rank	m/z [Da]	MH+ [Da]	Theo. MH+ [Da]	DeltaM [ppm]	Deltam/z [Da]	Activation Type	MS Order	Isolation Interference [%]	Ion Inject Time [ms]	RT [min]	First Scan	Spectrum File	File ID	Quan Info	Ions Score	Identity Strict	Identity Relaxed	Expectation Value	Percolator q-Value	Percolator PEP	Precursor Abundance	Apex RT [min]
		FALSE	High	Mascot (A5)	Unambiguous	[R].ELETQISELQEDLESER.[A]		1	1	Q8VDD5	Q8VDD5	0	2	1	0	1	1	1024.49	2047.98	2047.97	5.25	0.00537	HCD (High Energy Collision Dissociation)	MS2	0	25	55.5439	38454	MS201900102_Con1.raw	F1		22	44	37	1.94574	0	0.0007257
	FALSE	High	[K].EQADFAIEALAK.[A]			0.000412902	0	2	3	2	O08638; Q8VDD5	O08638 [415-426]; Q8VDD5 [408-419]	0	1305.67	0		No Quan Values	High	High	0	0.0003048	36		K.EQADFAIEALAK.A	[408-419]		Not Used
		Checked	Confidence	Identifying Node	PSM Ambiguity	Annotated Sequence	Modifications	# Protein Groups	# Proteins	Master Protein Accessions	Protein Accessions	# Missed Cleavages	Charge	DeltaScore	DeltaCn	Rank	Search Engine Rank	m/z [Da]	MH+ [Da]	Theo. MH+ [Da]	DeltaM [ppm]	Deltam/z [Da]	Activation Type	MS Order	Isolation Interference [%]	Ion Inject Time [ms]	RT [min]	First Scan	Spectrum File	File ID	Quan Info	Ions Score	Identity Strict	Identity Relaxed	Expectation Value	Percolator q-Value	Percolator PEP	Precursor Abundance	Apex RT [min]
		FALSE	High	Mascot (A5)	Unambiguous	[K].EQADFALEALAK.[A]		2	1		Q6URW6	0	2		0	1	2	653.345	1305.68	1305.67	11.59	0.00757	HCD (High Energy Collision Dissociation)	MS2	30.0965	25	39.5104	24250	MS201900102_Con1.raw	F1		36	40	33	0.0306988	0	0.0003048	538637	39.52
		FALSE	High	Mascot (A5)	Unambiguous	[K].EQADFAIEALAK.[A]		2	2	O08638; Q8VDD5	O08638; Q8VDD5	0	2	0	0	1	1	653.345	1305.68	1305.67	11.59	0.00757	HCD (High Energy Collision Dissociation)	MS2	30.0965	25	39.5104	24250	MS201900102_Con1.raw	F1		36	40	33	0.0306988	0	0.0003048	538637	39.52
	FALSE	High	[K].NFINNPLAQADWAAK.[K]			0.0133898	0.000581891	1	1	1	Q8VDD5	Q8VDD5 [15-29]	0	1672.84	0		No Quan Values	High	High	0.0004707	0.0111	19		K.NFINNPLAQADWAAK.K	[15-29]		Not Used
		Checked	Confidence	Identifying Node	PSM Ambiguity	Annotated Sequence	Modifications	# Protein Groups	# Proteins	Master Protein Accessions	Protein Accessions	# Missed Cleavages	Charge	DeltaScore	DeltaCn	Rank	Search Engine Rank	m/z [Da]	MH+ [Da]	Theo. MH+ [Da]	DeltaM [ppm]	Deltam/z [Da]	Activation Type	MS Order	Isolation Interference [%]	Ion Inject Time [ms]	RT [min]	First Scan	Spectrum File	File ID	Quan Info	Ions Score	Identity Strict	Identity Relaxed	Expectation Value	Percolator q-Value	Percolator PEP	Precursor Abundance	Apex RT [min]
		FALSE	High	Mascot (A5)	Unambiguous	[K].NFINNPLAQADWAAK.[K]		1	1	Q8VDD5	Q8VDD5	0	2	1	0	1	1	836.927	1672.85	1672.84	1.67	0.0014	HCD (High Energy Collision Dissociation)	MS2	43.8373	25	47.6371	33542	MS201900102_Con1.raw	F1		19	42	35	2.25919	0.0004707	0.0111
	FALSE	High	[R].VISGVLQLGNIAFKK.[E]			0.0055406	0.000581891	1	1	1	Q8VDD5	Q8VDD5 [342-356]	1	1586.96	0	100		High	High	0.0004707	0.004476	14	42.38	R.VISGVLQLGNIAFKK.E	[342-356]		Used
		Checked	Confidence	Identifying Node	PSM Ambiguity	Annotated Sequence	Modifications	# Protein Groups	# Proteins	Master Protein Accessions	Protein Accessions	# Missed Cleavages	Charge	DeltaScore	DeltaCn	Rank	Search Engine Rank	m/z [Da]	MH+ [Da]	Theo. MH+ [Da]	DeltaM [ppm]	Deltam/z [Da]	Activation Type	MS Order	Isolation Interference [%]	Ion Inject Time [ms]	RT [min]	First Scan	Spectrum File	File ID	Quan Info	Ions Score	Identity Strict	Identity Relaxed	Expectation Value	Percolator q-Value	Percolator PEP	Precursor Abundance	Apex RT [min]
		FALSE	High	Mascot (A5)	Unambiguous	[R].VISGVLQLGNIAFKK.[E]		1	1	Q8VDD5	Q8VDD5	1	2	1	0	1	1	793.994	1586.98	1586.96	11.75	0.00933	HCD (High Energy Collision Dissociation)	MS2	67.291	25	42.2199	27416	MS201900102_Con1.raw	F1		14	26	19	0.167517	0.0004707	0.004476	1.31387e+06	42.38
	FALSE	High	[K].NLPIYSEEIVEMYK.[G]	1xOxidation [M12]		0.00520206	0.000581891	1	1	1	Q8VDD5	Q8VDD5 [126-139]	0	1743.85	0		No Quan Values	High	High	0.0004707	0.004181	17		K.NLPIYSEEIVEMYK.G	[126-139]		Not Used
		Checked	Confidence	Identifying Node	PSM Ambiguity	Annotated Sequence	Modifications	# Protein Groups	# Proteins	Master Protein Accessions	Protein Accessions	# Missed Cleavages	Charge	DeltaScore	DeltaCn	Rank	Search Engine Rank	m/z [Da]	MH+ [Da]	Theo. MH+ [Da]	DeltaM [ppm]	Deltam/z [Da]	Activation Type	MS Order	Isolation Interference [%]	Ion Inject Time [ms]	RT [min]	First Scan	Spectrum File	File ID	Quan Info	Ions Score	Identity Strict	Identity Relaxed	Expectation Value	Percolator q-Value	Percolator PEP	Precursor Abundance	Apex RT [min]
		FALSE	High	Mascot (A5)	Unambiguous	[K].NLPIYSEEIVEmYK.[G]	M12(Oxidation)	1	1	Q8VDD5	Q8VDD5	0	2	1	0	1	1	872.435	1743.86	1743.85	7.23	0.0063	HCD (High Energy Collision Dissociation)	MS2	0	25	46.0737	31790	MS201900102_Con1.raw	F1		17	43	36	3.91513	0.0004707	0.004181	1482548	45.93
	FALSE	High	[K].KEEELQAALAR.[LV]			0.00391703	0.000581891	2	2	1	O08638; Q8VDD5	O08638 [1088-1098]; Q8VDD5 [1081-1091]	1	1257.68	0	100	Shared	High	High	0.0004707	0.003121	37	18.17	K.KEEELQAALAR.V	[1081-1091]		Used
		Checked	Confidence	Identifying Node	PSM Ambiguity	Annotated Sequence	Modifications	# Protein Groups	# Proteins	Master Protein Accessions	Protein Accessions	# Missed Cleavages	Charge	DeltaScore	DeltaCn	Rank	Search Engine Rank	m/z [Da]	MH+ [Da]	Theo. MH+ [Da]	DeltaM [ppm]	Deltam/z [Da]	Activation Type	MS Order	Isolation Interference [%]	Ion Inject Time [ms]	RT [min]	First Scan	Spectrum File	File ID	Quan Info	Ions Score	Identity Strict	Identity Relaxed	Expectation Value	Percolator q-Value	Percolator PEP	Precursor Abundance	Apex RT [min]
		FALSE	High	Mascot (A5)	Unambiguous	[K].KEEELQAALAR.[LV]		2	2	O08638; Q8VDD5	O08638; Q8VDD5	1	2	0.7297	0	1	1	629.349	1257.69	1257.68	8.73	0.00549	HCD (High Energy Collision Dissociation)	MS2	38.5369	25	18.1349	7366	MS201900102_Con1.raw	F1		37	39	32	0.0193858	0.0004707	0.003121	2384080	18.17
	FALSE	High	[K].ALELDSNLYR.[I]			0.00310854	0.000581891	1	1	1	Q8VDD5	Q8VDD5 [746-755]	0	1193.62	0		No Quan Values	High	High	0.0004707	0.002463	52		K.ALELDSNLYR.I	[746-755]		Not Used
		Checked	Confidence	Identifying Node	PSM Ambiguity	Annotated Sequence	Modifications	# Protein Groups	# Proteins	Master Protein Accessions	Protein Accessions	# Missed Cleavages	Charge	DeltaScore	DeltaCn	Rank	Search Engine Rank	m/z [Da]	MH+ [Da]	Theo. MH+ [Da]	DeltaM [ppm]	Deltam/z [Da]	Activation Type	MS Order	Isolation Interference [%]	Ion Inject Time [ms]	RT [min]	First Scan	Spectrum File	File ID	Quan Info	Ions Score	Identity Strict	Identity Relaxed	Expectation Value	Percolator q-Value	Percolator PEP	Precursor Abundance	Apex RT [min]
		FALSE	High	Mascot (A5)	Unambiguous	[K].ALELDSNLYR.[I]		1	1	Q8VDD5	Q8VDD5	0	2	0.7115	0	1	1	597.314	1193.62	1193.62	4.65	0.00278	HCD (High Energy Collision Dissociation)	MS2	0	25	33.1854	17771	MS201900102_Con1.raw	F1		52	40	33	0.000822404	0.0004707	0.002463
	FALSE	High	[R].ELEDATETADAMNR.[E]	1xOxidation [M12]		0.00417195	0.000581891	1	1	1	Q8VDD5	Q8VDD5 [1899-1912]	0	1581.67	0	100		High	High	0.0004707	0.003328	24	17.39	R.ELEDATETADAMNR.E	[1899-1912]		Used
		Checked	Confidence	Identifying Node	PSM Ambiguity	Annotated Sequence	Modifications	# Protein Groups	# Proteins	Master Protein Accessions	Protein Accessions	# Missed Cleavages	Charge	DeltaScore	DeltaCn	Rank	Search Engine Rank	m/z [Da]	MH+ [Da]	Theo. MH+ [Da]	DeltaM [ppm]	Deltam/z [Da]	Activation Type	MS Order	Isolation Interference [%]	Ion Inject Time [ms]	RT [min]	First Scan	Spectrum File	File ID	Quan Info	Ions Score	Identity Strict	Identity Relaxed	Expectation Value	Percolator q-Value	Percolator PEP	Precursor Abundance	Apex RT [min]
		FALSE	High	Mascot (A5)	Unambiguous	[R].ELEDATETADAmNR.[E]	M12(Oxidation)	1	1	Q8VDD5	Q8VDD5	0	2	1	0	1	1	791.344	1581.68	1581.67	7.04	0.00556	HCD (High Energy Collision Dissociation)	MS2	57.8214	10.411	17.3468	6517	MS201900102_Con1.raw	F1		24	42	35	0.787106	0.0004707	0.003328	3492345	17.39
	FALSE	High	[R].IMGIPEDEQMGLLR.[V]	2xOxidation [M2; M10]		0.0138908	0.000581891	1	1	1	Q8VDD5	Q8VDD5 [328-341]	0	1633.79	0		No Quan Values	High	High	0.0004707	0.01155	36		R.IMGIPEDEQMGLLR.V	[328-341]		Not Used
		Checked	Confidence	Identifying Node	PSM Ambiguity	Annotated Sequence	Modifications	# Protein Groups	# Proteins	Master Protein Accessions	Protein Accessions	# Missed Cleavages	Charge	DeltaScore	DeltaCn	Rank	Search Engine Rank	m/z [Da]	MH+ [Da]	Theo. MH+ [Da]	DeltaM [ppm]	Deltam/z [Da]	Activation Type	MS Order	Isolation Interference [%]	Ion Inject Time [ms]	RT [min]	First Scan	Spectrum File	File ID	Quan Info	Ions Score	Identity Strict	Identity Relaxed	Expectation Value	Percolator q-Value	Percolator PEP	Precursor Abundance	Apex RT [min]
		FALSE	High	Mascot (A5)	Unambiguous	[R].ImGIPEDEQmGLLR.[V]	M2(Oxidation); M10(Oxidation)	1	1	Q8VDD5	Q8VDD5	0	2	0.9722	0	1	1	817.406	1633.81	1633.79	8	0.00653	HCD (High Energy Collision Dissociation)	MS2	0	25	34.3425	18712	MS201900102_Con1.raw	F1		36	42	35	0.0538109	0.0004707	0.01155
	FALSE	High	[K].LDPHLVLDQLR.[C]			0.0040213	0.000581891	1	2	1	Q8VDD5	Q8VDD5 [683-693]	0	1318.75	0	100		High	High	0.0004707	0.003204	22	40.42	K.LDPHLVLDQLR.C	[683-693]		Used
		Checked	Confidence	Identifying Node	PSM Ambiguity	Annotated Sequence	Modifications	# Protein Groups	# Proteins	Master Protein Accessions	Protein Accessions	# Missed Cleavages	Charge	DeltaScore	DeltaCn	Rank	Search Engine Rank	m/z [Da]	MH+ [Da]	Theo. MH+ [Da]	DeltaM [ppm]	Deltam/z [Da]	Activation Type	MS Order	Isolation Interference [%]	Ion Inject Time [ms]	RT [min]	First Scan	Spectrum File	File ID	Quan Info	Ions Score	Identity Strict	Identity Relaxed	Expectation Value	Percolator q-Value	Percolator PEP	Precursor Abundance	Apex RT [min]
		FALSE	High	Mascot (A5)	Unambiguous	[K].LDPHLVLDQLR.[C]		1	2	Q8VDD5	Q8VDD5; Q61879	0	2	0.4091	0	1	1	659.883	1318.76	1318.75	7.94	0.00523	HCD (High Energy Collision Dissociation)	MS2	79.4436	25	40.2972	25193	MS201900102_Con1.raw	F1		22	36	29	0.25822	0.0004707	0.003204	1.08928e+06	40.42
	FALSE	High	[R].RGDLPFVVTR.[R]			0.0688634	0.00154131	1	1	1	Q8VDD5	Q8VDD5 [1923-1932]	1	1159.66	0		No Quan Values	High	High	0.001254	0.06054	39		R.RGDLPFVVTR.R	[1923-1932]		Not Used
		Checked	Confidence	Identifying Node	PSM Ambiguity	Annotated Sequence	Modifications	# Protein Groups	# Proteins	Master Protein Accessions	Protein Accessions	# Missed Cleavages	Charge	DeltaScore	DeltaCn	Rank	Search Engine Rank	m/z [Da]	MH+ [Da]	Theo. MH+ [Da]	DeltaM [ppm]	Deltam/z [Da]	Activation Type	MS Order	Isolation Interference [%]	Ion Inject Time [ms]	RT [min]	First Scan	Spectrum File	File ID	Quan Info	Ions Score	Identity Strict	Identity Relaxed	Expectation Value	Percolator q-Value	Percolator PEP	Precursor Abundance	Apex RT [min]
		FALSE	High	Mascot (A5)	Unambiguous	[R].RGDLPFVVTR.[R]		1	1	Q8VDD5	Q8VDD5	1	2	0.7949	0	1	1	580.337	1159.67	1159.66	6.66	0.00386	HCD (High Energy Collision Dissociation)	MS2	0	23.575	26.4922	12547	MS201900102_Con1.raw	F1		39	37	30	0.00691868	0.001254	0.06054
	FALSE	High	[R].TEMEDLMSSKDDVGK.[S]	2xOxidation [M3; M7]		0.108267	0.0029762	1	1	1	Q8VDD5	Q8VDD5 [1504-1518]	1	1716.73	0		No Quan Values	High	High	0.002413	0.09623	12		R.TEMEDLMSSKDDVGK.S	[1504-1518]		Not Used
		Checked	Confidence	Identifying Node	PSM Ambiguity	Annotated Sequence	Modifications	# Protein Groups	# Proteins	Master Protein Accessions	Protein Accessions	# Missed Cleavages	Charge	DeltaScore	DeltaCn	Rank	Search Engine Rank	m/z [Da]	MH+ [Da]	Theo. MH+ [Da]	DeltaM [ppm]	Deltam/z [Da]	Activation Type	MS Order	Isolation Interference [%]	Ion Inject Time [ms]	RT [min]	First Scan	Spectrum File	File ID	Quan Info	Ions Score	Identity Strict	Identity Relaxed	Expectation Value	Percolator q-Value	Percolator PEP	Precursor Abundance	Apex RT [min]
		FALSE	High	Mascot (A5)	Unambiguous	[R].TEmEDLmSSKDDVGK.[S]	M3(Oxidation); M7(Oxidation)	1	1	Q8VDD5	Q8VDD5	1	3	1	0	1	1	572.918	1716.74	1716.73	5.51	0.00315	HCD (High Energy Collision Dissociation)	MS2	41.4163	25	15.2972	4933	MS201900102_Con1.raw	F1		12	43	36	15.536	0.002413	0.09623
	FALSE	High	[R].GDLPFVVTR.[R]			0.19343	0.00650274	1	1	1	Q8VDD5	Q8VDD5 [1924-1932]	0	1003.56	0	100		High	High	0.00527	0.1752	7	35.05	R.GDLPFVVTR.R	[1924-1932]		Used
		Checked	Confidence	Identifying Node	PSM Ambiguity	Annotated Sequence	Modifications	# Protein Groups	# Proteins	Master Protein Accessions	Protein Accessions	# Missed Cleavages	Charge	DeltaScore	DeltaCn	Rank	Search Engine Rank	m/z [Da]	MH+ [Da]	Theo. MH+ [Da]	DeltaM [ppm]	Deltam/z [Da]	Activation Type	MS Order	Isolation Interference [%]	Ion Inject Time [ms]	RT [min]	First Scan	Spectrum File	File ID	Quan Info	Ions Score	Identity Strict	Identity Relaxed	Expectation Value	Percolator q-Value	Percolator PEP	Precursor Abundance	Apex RT [min]
		FALSE	High	Mascot (A5)	Selected	[R].GDLPFVVTR.[R]		1	1	Q8VDD5	Q8VDD5	0	2		0	4	4	502.287	1003.57	1003.56	9.13	0.00458	HCD (High Energy Collision Dissociation)	MS2	45.1768	25	34.9966	19233	MS201900102_Con1.raw	F1		7	38	31	12.3783	0.00527	0.1752	1426340	35.05
FALSE	High	Master Protein	P56480	ATP synthase subunit beta, mitochondrial OS=Mus musculus OX=10090 GN=Atp5f1b PE=1 SV=2	0	66.39	48	16	22	16	1	529	56.3	5.34	759	16	cell differentiation;cellular homeostasis;metabolic process;regulation of biological process;transport	cell surface;membrane;mitochondrion;nucleus	catalytic activity;metal ion binding;nucleotide binding;protein binding;receptor activity;transporter activity	Pf00006, Pf00306, Pf02874	11947	ENSMUSG00000025393.12	Atp5b	10	Electron Transport Chain; Oxidative phosphorylation	Metabolic pathways; Huntington's disease; Oxidative phosphorylation; Parkinson's disease; Alzheimer's disease	0	100	High
	Checked	Confidence	Annotated Sequence	Modifications	Modifications in Master Proteins	Qvality PEP	Qvality q-value	# Protein Groups	# Proteins	# PSMs	Master Protein Accessions	Positions in Master Proteins	# Missed Cleavages	Theo. MH+ [Da]	# Razor Quan Results	Abundances (Scaled): F1: Sample	Quan Info	Found in Sample: [S1] F1: Sample	Confidence (by Search Engine): Mascot	Percolator q-Value (by Search Engine): Mascot	Percolator PEP (by Search Engine): Mascot	Ions Score (by Search Engine): Mascot	Top Apex RT [min]	Sequence in Protein	Positions in Protein	Peptide Group Modifications in Protein	Quan Usage
	FALSE	High	[K].SLQDIIAILGMDELSEEDKLTVSR.[A]	1xOxidation [M11]		0.00037561	0	1	1	1	P56480	P56480 [433-456]	1	2691.38	0		No Quan Values	High	High	0	0.000277	43		K.SLQDIIAILGMDELSEEDKLTVSR.A	[433-456]		Not Used
		Checked	Confidence	Identifying Node	PSM Ambiguity	Annotated Sequence	Modifications	# Protein Groups	# Proteins	Master Protein Accessions	Protein Accessions	# Missed Cleavages	Charge	DeltaScore	DeltaCn	Rank	Search Engine Rank	m/z [Da]	MH+ [Da]	Theo. MH+ [Da]	DeltaM [ppm]	Deltam/z [Da]	Activation Type	MS Order	Isolation Interference [%]	Ion Inject Time [ms]	RT [min]	First Scan	Spectrum File	File ID	Quan Info	Ions Score	Identity Strict	Identity Relaxed	Expectation Value	Percolator q-Value	Percolator PEP	Precursor Abundance	Apex RT [min]
		FALSE	High	Mascot (A5)	Unambiguous	[K].SLQDIIAILGmDELSEEDKLTVSR.[A]	M11(Oxidation)	1	1	P56480	P56480	1	3	1	0	1	1	897.805	2691.4	2691.38	9.53	0.00855	HCD (High Energy Collision Dissociation)	MS2	0	25	71.4452	54510	MS201900102_Con1.raw	F1		43	41	34	0.00690656	0	0.000277
	FALSE	High	[R].FTQAGSEVSALLGR.[I]			9.37038e-05	0	1	1	1	P56480	P56480 [311-324]	0	1435.75	0	100		High	High	0	6.574e-05	57	40.27	R.FTQAGSEVSALLGR.I	[311-324]		Used
		Checked	Confidence	Identifying Node	PSM Ambiguity	Annotated Sequence	Modifications	# Protein Groups	# Proteins	Master Protein Accessions	Protein Accessions	# Missed Cleavages	Charge	DeltaScore	DeltaCn	Rank	Search Engine Rank	m/z [Da]	MH+ [Da]	Theo. MH+ [Da]	DeltaM [ppm]	Deltam/z [Da]	Activation Type	MS Order	Isolation Interference [%]	Ion Inject Time [ms]	RT [min]	First Scan	Spectrum File	File ID	Quan Info	Ions Score	Identity Strict	Identity Relaxed	Expectation Value	Percolator q-Value	Percolator PEP	Precursor Abundance	Apex RT [min]
		FALSE	High	Mascot (A5)	Unambiguous	[R].FTQAGSEVSALLGR.[I]		1	1	P56480	P56480	0	2	0.9825	0	1	1	718.388	1435.77	1435.75	10.36	0.00744	HCD (High Energy Collision Dissociation)	MS2	56.6079	21.095	40.0852	24936	MS201900102_Con1.raw	F1		57	40	33	0.000212321	0	6.574e-05	6270483	40.27
	FALSE	High	[R].FLSQPFQVAEVFTGHMGK.[L]			5.77015e-06	0	1	1	1	P56480	P56480 [463-480]	0	2023.01	0		No Quan Values	High	High	0	3.687e-06	108		R.FLSQPFQVAEVFTGHMGK.L	[463-480]		Not Used
		Checked	Confidence	Identifying Node	PSM Ambiguity	Annotated Sequence	Modifications	# Protein Groups	# Proteins	Master Protein Accessions	Protein Accessions	# Missed Cleavages	Charge	DeltaScore	DeltaCn	Rank	Search Engine Rank	m/z [Da]	MH+ [Da]	Theo. MH+ [Da]	DeltaM [ppm]	Deltam/z [Da]	Activation Type	MS Order	Isolation Interference [%]	Ion Inject Time [ms]	RT [min]	First Scan	Spectrum File	File ID	Quan Info	Ions Score	Identity Strict	Identity Relaxed	Expectation Value	Percolator q-Value	Percolator PEP	Precursor Abundance	Apex RT [min]
		FALSE	High	Mascot (A5)	Unambiguous	[R].FLSQPFQVAEVFTGHMGK.[L]		1	1	P56480	P56480	0	3	0.9352	0	1	1	675.015	2023.03	2023.01	9.29	0.00627	HCD (High Energy Collision Dissociation)	MS2	0	25	54.6183	37918	MS201900102_Con1.raw	F1		108	42	35	2.72614e-09	0	3.687e-06	2.47731e+06	54.73
	FALSE	High	[R].TIAMDGTEGLVR.[G]			0.00206326	0	1	1	1	P56480	P56480 [110-121]	0	1262.64	0		No Quan Values	High	High	0	0.00161	51		R.TIAMDGTEGLVR.G	[110-121]		Not Used
		Checked	Confidence	Identifying Node	PSM Ambiguity	Annotated Sequence	Modifications	# Protein Groups	# Proteins	Master Protein Accessions	Protein Accessions	# Missed Cleavages	Charge	DeltaScore	DeltaCn	Rank	Search Engine Rank	m/z [Da]	MH+ [Da]	Theo. MH+ [Da]	DeltaM [ppm]	Deltam/z [Da]	Activation Type	MS Order	Isolation Interference [%]	Ion Inject Time [ms]	RT [min]	First Scan	Spectrum File	File ID	Quan Info	Ions Score	Identity Strict	Identity Relaxed	Expectation Value	Percolator q-Value	Percolator PEP	Precursor Abundance	Apex RT [min]
		FALSE	High	Mascot (A5)	Unambiguous	[R].TIAMDGTEGLVR.[G]		1	1	P56480	P56480	0	2	0.549	0	1	1	631.825	1262.64	1262.64	1.84	0.00116	HCD (High Energy Collision Dissociation)	MS2	26.0383	23.039	29.5946	14747	MS201900102_Con1.raw	F1		51	41	34	0.00108662	0	0.00161	3.61461e+06	29.7
	FALSE	High	[R].LVLEVAQHLGESTVR.[T]			0.000211731	0	1	1	2	P56480	P56480 [95-109]	0	1650.92	0	100		High	High	0	0.0001533	54	35.24	R.LVLEVAQHLGESTVR.T	[95-109]		Used
		Checked	Confidence	Identifying Node	PSM Ambiguity	Annotated Sequence	Modifications	# Protein Groups	# Proteins	Master Protein Accessions	Protein Accessions	# Missed Cleavages	Charge	DeltaScore	DeltaCn	Rank	Search Engine Rank	m/z [Da]	MH+ [Da]	Theo. MH+ [Da]	DeltaM [ppm]	Deltam/z [Da]	Activation Type	MS Order	Isolation Interference [%]	Ion Inject Time [ms]	RT [min]	First Scan	Spectrum File	File ID	Quan Info	Ions Score	Identity Strict	Identity Relaxed	Expectation Value	Percolator q-Value	Percolator PEP	Precursor Abundance	Apex RT [min]
		FALSE	High	Mascot (A5)	Unambiguous	[R].LVLEVAQHLGESTVR.[T]		1	1	P56480	P56480	0	2	1	0	1	1	825.97	1650.93	1650.92	9.35	0.00772	HCD (High Energy Collision Dissociation)	MS2	0	25	35.0717	19297	MS201900102_Con1.raw	F1		54	36	29	0.000162551	0	0.0001533	6418960	35.22
		FALSE	High	Mascot (A5)	Unambiguous	[R].LVLEVAQHLGESTVR.[T]		1	1	P56480	P56480	0	3	1	0	1	1	550.98	1650.93	1650.92	5.76	0.00317	HCD (High Energy Collision Dissociation)	MS2	45.6943	25	35.0724	19298	MS201900102_Con1.raw	F1		30	36	29	0.0525646	0.0004707	0.02999	4.18483e+06	35.24
	FALSE	High	[R].IPSAVGYQPTLATDMGTMQER.[I]			3.1381e-05	0	1	1	1	P56480	P56480 [325-345]	0	2266.08	0	100		High	High	0	2.132e-05	57	42.86	R.IPSAVGYQPTLATDMGTMQER.I	[325-345]		Used
		Checked	Confidence	Identifying Node	PSM Ambiguity	Annotated Sequence	Modifications	# Protein Groups	# Proteins	Master Protein Accessions	Protein Accessions	# Missed Cleavages	Charge	DeltaScore	DeltaCn	Rank	Search Engine Rank	m/z [Da]	MH+ [Da]	Theo. MH+ [Da]	DeltaM [ppm]	Deltam/z [Da]	Activation Type	MS Order	Isolation Interference [%]	Ion Inject Time [ms]	RT [min]	First Scan	Spectrum File	File ID	Quan Info	Ions Score	Identity Strict	Identity Relaxed	Expectation Value	Percolator q-Value	Percolator PEP	Precursor Abundance	Apex RT [min]
		FALSE	High	Mascot (A5)	Unambiguous	[R].IPSAVGYQPTLATDMGTMQER.[I]		1	1	P56480	P56480	0	2	1	0	1	1	1133.56	2266.11	2266.08	9.5	0.01077	HCD (High Energy Collision Dissociation)	MS2	24.3854	25	42.7452	28047	MS201900102_Con1.raw	F1		57	44	37	0.000562468	0	2.132e-05	2278268	42.86
	FALSE	High	[R].IPSAVGYQPTLATDMGTMQER.[I]	1xOxidation [M18]		8.39057e-05	0	1	1	2	P56480	P56480 [325-345]	0	2282.08	0	100		High	High	0	5.889e-05	39	38.03	R.IPSAVGYQPTLATDMGTMQER.I	[325-345]		Used
		Checked	Confidence	Identifying Node	PSM Ambiguity	Annotated Sequence	Modifications	# Protein Groups	# Proteins	Master Protein Accessions	Protein Accessions	# Missed Cleavages	Charge	DeltaScore	DeltaCn	Rank	Search Engine Rank	m/z [Da]	MH+ [Da]	Theo. MH+ [Da]	DeltaM [ppm]	Deltam/z [Da]	Activation Type	MS Order	Isolation Interference [%]	Ion Inject Time [ms]	RT [min]	First Scan	Spectrum File	File ID	Quan Info	Ions Score	Identity Strict	Identity Relaxed	Expectation Value	Percolator q-Value	Percolator PEP	Precursor Abundance	Apex RT [min]
		FALSE	High	Mascot (A5)	Unambiguous	[R].IPSAVGYQPTLATDMGTmQER.[I]	M18(Oxidation)	1	1	P56480	P56480	0	2	0.1795	0	1	1	1141.56	2282.12	2282.08	15.84	0.01807	HCD (High Energy Collision Dissociation)	MS2	0	25	37.9085	22392	MS201900102_Con1.raw	F1		39	44	37	0.0404621	0	5.889e-05	832368	38.03
		FALSE	High	Mascot (A5)	Unambiguous	[R].IPSAVGYQPTLATDMGTmQER.[I]	M18(Oxidation)	1	1	P56480	P56480	0	3	0.5263	0	1	1	761.371	2282.1	2282.08	8.58	0.00653	HCD (High Energy Collision Dissociation)	MS2	0	25	37.9672	22465	MS201900102_Con1.raw	F1		19	45	38	3.67011	0	0.001235	536531	38.45
	FALSE	High	[K].VLDSGAPIKIPVGPETLGR.[I]			0.000341685	0	1	1	1	P56480	P56480 [125-143]	1	1919.1	0	100		High	High	0	0.0002511	32	40.03	K.VLDSGAPIKIPVGPETLGR.I	[125-143]		Used
		Checked	Confidence	Identifying Node	PSM Ambiguity	Annotated Sequence	Modifications	# Protein Groups	# Proteins	Master Protein Accessions	Protein Accessions	# Missed Cleavages	Charge	DeltaScore	DeltaCn	Rank	Search Engine Rank	m/z [Da]	MH+ [Da]	Theo. MH+ [Da]	DeltaM [ppm]	Deltam/z [Da]	Activation Type	MS Order	Isolation Interference [%]	Ion Inject Time [ms]	RT [min]	First Scan	Spectrum File	File ID	Quan Info	Ions Score	Identity Strict	Identity Relaxed	Expectation Value	Percolator q-Value	Percolator PEP	Precursor Abundance	Apex RT [min]
		FALSE	High	Mascot (A5)	Unambiguous	[K].VLDSGAPIKIPVGPETLGR.[I]		1	1	P56480	P56480	1	3	1	0	1	1	640.375	1919.11	1919.1	7.51	0.0048	HCD (High Energy Collision Dissociation)	MS2	29.2504	25	39.9118	24726	MS201900102_Con1.raw	F1		32	32	25	0.0093842	0	0.0002511	2.49527e+06	40.03
	FALSE	High	[R].AIAELGIYPAVDPLDSTSR.[I]			0.000475895	0	1	1	1	P56480	P56480 [388-406]	0	1988.03	0		No Quan Values	High	High	0	0.000354	40		R.AIAELGIYPAVDPLDSTSR.I	[388-406]		Not Used
		Checked	Confidence	Identifying Node	PSM Ambiguity	Annotated Sequence	Modifications	# Protein Groups	# Proteins	Master Protein Accessions	Protein Accessions	# Missed Cleavages	Charge	DeltaScore	DeltaCn	Rank	Search Engine Rank	m/z [Da]	MH+ [Da]	Theo. MH+ [Da]	DeltaM [ppm]	Deltam/z [Da]	Activation Type	MS Order	Isolation Interference [%]	Ion Inject Time [ms]	RT [min]	First Scan	Spectrum File	File ID	Quan Info	Ions Score	Identity Strict	Identity Relaxed	Expectation Value	Percolator q-Value	Percolator PEP	Precursor Abundance	Apex RT [min]
		FALSE	High	Mascot (A5)	Unambiguous	[R].AIAELGIYPAVDPLDSTSR.[I]		1	1	P56480	P56480	0	2	1	0	1	1	994.524	1988.04	1988.03	3.56	0.00354	HCD (High Energy Collision Dissociation)	MS2	0	25	55.47	38397	MS201900102_Con1.raw	F1		40	41	34	0.014197	0	0.000354	2.07315e+06	55.43
	FALSE	High	[K].TVLIMELINNVAK.[A]			0.000525901	0	1	1	2	P56480	P56480 [213-225]	0	1457.84	0	100		High	High	0	0.0009988	48	66.99	K.TVLIMELINNVAK.A	[213-225]		Used
		Checked	Confidence	Identifying Node	PSM Ambiguity	Annotated Sequence	Modifications	# Protein Groups	# Proteins	Master Protein Accessions	Protein Accessions	# Missed Cleavages	Charge	DeltaScore	DeltaCn	Rank	Search Engine Rank	m/z [Da]	MH+ [Da]	Theo. MH+ [Da]	DeltaM [ppm]	Deltam/z [Da]	Activation Type	MS Order	Isolation Interference [%]	Ion Inject Time [ms]	RT [min]	First Scan	Spectrum File	File ID	Quan Info	Ions Score	Identity Strict	Identity Relaxed	Expectation Value	Percolator q-Value	Percolator PEP	Precursor Abundance	Apex RT [min]
		FALSE	High	Mascot (A5)	Unambiguous	[K].TVLIMELINNVAK.[A]		1	1	P56480	P56480	0	2	0.7907	0	1	1	729.43	1457.85	1457.84	9.65	0.00704	HCD (High Energy Collision Dissociation)	MS2	28.8874	25	66.8392	49461	MS201900102_Con1.raw	F1		43	34	27	0.00146013	0	0.0003908	2.19458e+06	66.99
		FALSE	High	Mascot (A5)	Unambiguous	[K].TVLIMELINNVAK.[A]		1	1	P56480	P56480	0	2	0.8125	0	1	1	729.43	1457.85	1457.84	8.98	0.00655	HCD (High Energy Collision Dissociation)	MS2	0	25	67.3146	49993	MS201900102_Con1.raw	F1		48	34	27	0.000488246	0	0.0009988	2.19458e+06	66.99
	FALSE	High	[R].VALTGLTVAEYFR.[D]			1.62449e-06	0	1	1	2	P56480	P56480 [282-294]	0	1439.79	0		No Quan Values	High	High	0	9.983e-07	87		R.VALTGLTVAEYFR.D	[282-294]		Not Used
		Checked	Confidence	Identifying Node	PSM Ambiguity	Annotated Sequence	Modifications	# Protein Groups	# Proteins	Master Protein Accessions	Protein Accessions	# Missed Cleavages	Charge	DeltaScore	DeltaCn	Rank	Search Engine Rank	m/z [Da]	MH+ [Da]	Theo. MH+ [Da]	DeltaM [ppm]	Deltam/z [Da]	Activation Type	MS Order	Isolation Interference [%]	Ion Inject Time [ms]	RT [min]	First Scan	Spectrum File	File ID	Quan Info	Ions Score	Identity Strict	Identity Relaxed	Expectation Value	Percolator q-Value	Percolator PEP	Precursor Abundance	Apex RT [min]
		FALSE	High	Mascot (A5)	Unambiguous	[R].VALTGLTVAEYFR.[D]		1	1	P56480	P56480	0	2	0.9878	0	1	1	720.407	1439.81	1439.79	11.83	0.00852	HCD (High Energy Collision Dissociation)	MS2	0	16.86	54.5204	37844	MS201900102_Con1.raw	F1		82	37	30	3.74088e-07	0	3.248e-05	9781943	54.52
		FALSE	High	Mascot (A5)	Unambiguous	[R].VALTGLTVAEYFR.[D]		1	1	P56480	P56480	0	2	0.931	0	1	1	720.404	1439.8	1439.79	8.27	0.00595	HCD (High Energy Collision Dissociation)	MS2	0	13.937	54.513	37839	MS201900102_Con1.raw	F1		87	38	31	1.33002e-07	0	9.983e-07	9781943	54.52
	FALSE	High	[K].VALVYGQMNEPPGAR.[A]			4.37084e-05	0	1	1	2	P56480	P56480 [265-279]	0	1601.81	0		No Quan Values	High	High	0	2.987e-05	90		K.VALVYGQMNEPPGAR.A	[265-279]		Not Used
		Checked	Confidence	Identifying Node	PSM Ambiguity	Annotated Sequence	Modifications	# Protein Groups	# Proteins	Master Protein Accessions	Protein Accessions	# Missed Cleavages	Charge	DeltaScore	DeltaCn	Rank	Search Engine Rank	m/z [Da]	MH+ [Da]	Theo. MH+ [Da]	DeltaM [ppm]	Deltam/z [Da]	Activation Type	MS Order	Isolation Interference [%]	Ion Inject Time [ms]	RT [min]	First Scan	Spectrum File	File ID	Quan Info	Ions Score	Identity Strict	Identity Relaxed	Expectation Value	Percolator q-Value	Percolator PEP	Precursor Abundance	Apex RT [min]
		FALSE	High	Mascot (A5)	Unambiguous	[K].VALVYGQMNEPPGAR.[A]		1	1	P56480	P56480	0	2	0.9444	0	1	1	801.414	1601.82	1601.81	6.88	0.00551	HCD (High Energy Collision Dissociation)	MS2	30.9358	25	31.0067	15969	MS201900102_Con1.raw	F1		72	41	34	9.60633e-06	0	0.000113	3.15949e+06	31.07
		FALSE	High	Mascot (A5)	Unambiguous	[K].VALVYGQMNEPPGAR.[A]		1	1	P56480	P56480	0	2	0.9	0	1	1	801.413	1601.82	1601.81	4.59	0.00368	HCD (High Energy Collision Dissociation)	MS2	0	25	30.9826	15946	MS201900102_Con1.raw	F1		90	41	34	1.47922e-07	0	2.987e-05	3.15949e+06	31.07
	FALSE	High	[R].TREGNDLYHEMIESGVINLK.[D]			0.000480926	0	1	1	1	P56480	P56480 [240-259]	1	2318.14	0	100		High	High	0	0.0003572	31	44.63	R.TREGNDLYHEMIESGVINLK.D	[240-259]		Used
		Checked	Confidence	Identifying Node	PSM Ambiguity	Annotated Sequence	Modifications	# Protein Groups	# Proteins	Master Protein Accessions	Protein Accessions	# Missed Cleavages	Charge	DeltaScore	DeltaCn	Rank	Search Engine Rank	m/z [Da]	MH+ [Da]	Theo. MH+ [Da]	DeltaM [ppm]	Deltam/z [Da]	Activation Type	MS Order	Isolation Interference [%]	Ion Inject Time [ms]	RT [min]	First Scan	Spectrum File	File ID	Quan Info	Ions Score	Identity Strict	Identity Relaxed	Expectation Value	Percolator q-Value	Percolator PEP	Precursor Abundance	Apex RT [min]
		FALSE	High	Mascot (A5)	Unambiguous	[R].TREGNDLYHEMIESGVINLK.[D]		1	1	P56480	P56480	1	3	1	0	1	1	773.395	2318.17	2318.14	11.29	0.00872	HCD (High Energy Collision Dissociation)	MS2	66.4381	25	44.5042	30000	MS201900102_Con1.raw	F1		31	43	36	0.16898	0	0.0003572	1.45708e+06	44.63
	FALSE	High	[K].VVDLLAPYAK.[G]			0.0026552	0.000581891	1	1	1	P56480	P56480 [189-198]	0	1088.64	0	100		High	High	0.0004707	0.002091	58	37.15	K.VVDLLAPYAK.G	[189-198]		Used
		Checked	Confidence	Identifying Node	PSM Ambiguity	Annotated Sequence	Modifications	# Protein Groups	# Proteins	Master Protein Accessions	Protein Accessions	# Missed Cleavages	Charge	DeltaScore	DeltaCn	Rank	Search Engine Rank	m/z [Da]	MH+ [Da]	Theo. MH+ [Da]	DeltaM [ppm]	Deltam/z [Da]	Activation Type	MS Order	Isolation Interference [%]	Ion Inject Time [ms]	RT [min]	First Scan	Spectrum File	File ID	Quan Info	Ions Score	Identity Strict	Identity Relaxed	Expectation Value	Percolator q-Value	Percolator PEP	Precursor Abundance	Apex RT [min]
		FALSE	High	Mascot (A5)	Unambiguous	[K].VVDLLAPYAK.[G]		1	1	P56480	P56480	0	2	1	0	1	1	544.826	1088.65	1088.64	9.56	0.00521	HCD (High Energy Collision Dissociation)	MS2	7.87523	20.783	37.0302	21346	MS201900102_Con1.raw	F1		58	35	28	4.93796e-05	0.0004707	0.002091	3901422	37.15
	FALSE	High	[R].DQEGQDVLLFIDNIFR.[F]			0.00631831	0.000581891	1	1	1	P56480	P56480 [295-310]	0	1921.97	0		No Quan Values	High	High	0.0004707	0.005116	38		R.DQEGQDVLLFIDNIFR.F	[295-310]		Not Used
		Checked	Confidence	Identifying Node	PSM Ambiguity	Annotated Sequence	Modifications	# Protein Groups	# Proteins	Master Protein Accessions	Protein Accessions	# Missed Cleavages	Charge	DeltaScore	DeltaCn	Rank	Search Engine Rank	m/z [Da]	MH+ [Da]	Theo. MH+ [Da]	DeltaM [ppm]	Deltam/z [Da]	Activation Type	MS Order	Isolation Interference [%]	Ion Inject Time [ms]	RT [min]	First Scan	Spectrum File	File ID	Quan Info	Ions Score	Identity Strict	Identity Relaxed	Expectation Value	Percolator q-Value	Percolator PEP	Precursor Abundance	Apex RT [min]
		FALSE	High	Mascot (A5)	Unambiguous	[R].DQEGQDVLLFIDNIFR.[F]		1	1	P56480	P56480	0	2	1	0	1	1	961.494	1921.98	1921.97	7.73	0.00743	HCD (High Energy Collision Dissociation)	MS2	3.18945	25	73.0951	56430	MS201900102_Con1.raw	F1		38	42	35	0.0332557	0.0004707	0.005116
	FALSE	High	[K].IGLFGGAGVGK.[T]			0.00755401	0.000581891	1	1	1	P56480	P56480 [202-212]	0	975.562	0	100		High	High	0.0004707	0.00616	39	31.5	K.IGLFGGAGVGK.T	[202-212]		Used
		Checked	Confidence	Identifying Node	PSM Ambiguity	Annotated Sequence	Modifications	# Protein Groups	# Proteins	Master Protein Accessions	Protein Accessions	# Missed Cleavages	Charge	DeltaScore	DeltaCn	Rank	Search Engine Rank	m/z [Da]	MH+ [Da]	Theo. MH+ [Da]	DeltaM [ppm]	Deltam/z [Da]	Activation Type	MS Order	Isolation Interference [%]	Ion Inject Time [ms]	RT [min]	First Scan	Spectrum File	File ID	Quan Info	Ions Score	Identity Strict	Identity Relaxed	Expectation Value	Percolator q-Value	Percolator PEP	Precursor Abundance	Apex RT [min]
		FALSE	High	Mascot (A5)	Unambiguous	[K].IGLFGGAGVGK.[T]		1	1	P56480	P56480	0	2	0.641	0	1	1	488.288	975.569	975.562	7.37	0.0036	HCD (High Energy Collision Dissociation)	MS2	36.9463	25	31.3803	16287	MS201900102_Con1.raw	F1		39	36	29	0.00590913	0.0004707	0.00616	7.13312e+06	31.5
	FALSE	High	[R].IMNVIGEPIDER.[G]			0.0255048	0.000581891	1	1	1	P56480	P56480 [144-155]	0	1385.71	0	100		High	High	0.0004707	0.02167	50	34.2	R.IMNVIGEPIDER.G	[144-155]		Used
		Checked	Confidence	Identifying Node	PSM Ambiguity	Annotated Sequence	Modifications	# Protein Groups	# Proteins	Master Protein Accessions	Protein Accessions	# Missed Cleavages	Charge	DeltaScore	DeltaCn	Rank	Search Engine Rank	m/z [Da]	MH+ [Da]	Theo. MH+ [Da]	DeltaM [ppm]	Deltam/z [Da]	Activation Type	MS Order	Isolation Interference [%]	Ion Inject Time [ms]	RT [min]	First Scan	Spectrum File	File ID	Quan Info	Ions Score	Identity Strict	Identity Relaxed	Expectation Value	Percolator q-Value	Percolator PEP	Precursor Abundance	Apex RT [min]
		FALSE	High	Mascot (A5)	Unambiguous	[R].IMNVIGEPIDER.[G]		1	1	P56480	P56480	0	2	0.96	0	1	1	693.364	1385.72	1385.71	8.16	0.00565	HCD (High Energy Collision Dissociation)	MS2	42.5686	25	34.0316	18452	MS201900102_Con1.raw	F1		50	41	34	0.00118425	0.0004707	0.02167	5.4152e+06	34.2
FALSE	High	Master Protein	Q9D6F9	Tubulin beta-4A chain OS=Mus musculus OX=10090 GN=Tubb4a PE=1 SV=3	0	62.221	39	13	33	3	1	444	49.6	4.88	804	13	cell organization and biogenesis;regulation of biological process	cytoplasm;cytoskeleton;nucleus	catalytic activity;metal ion binding;nucleotide binding;structural molecule activity	Pf00091, Pf03953, Pf10644	22153	ENSMUSG00000062591.5	Tubb4a	17	Exercise-induced Circadian Regulation	Phagosome; Gap junction	1	100	High
	Checked	Confidence	Annotated Sequence	Modifications	Modifications in Master Proteins	Qvality PEP	Qvality q-value	# Protein Groups	# Proteins	# PSMs	Master Protein Accessions	Positions in Master Proteins	# Missed Cleavages	Theo. MH+ [Da]	# Razor Quan Results	Abundances (Scaled): F1: Sample	Quan Info	Found in Sample: [S1] F1: Sample	Confidence (by Search Engine): Mascot	Percolator q-Value (by Search Engine): Mascot	Percolator PEP (by Search Engine): Mascot	Ions Score (by Search Engine): Mascot	Top Apex RT [min]	Sequence in Protein	Positions in Protein	Peptide Group Modifications in Protein	Quan Usage
	FALSE	High	[R].SGPFGQIFRPDNFVFGQSGAGNNWAK.[G]			5.3834e-07	0	3	5	1	Q7TMM9; Q9D6F9; P99024	Q7TMM9 [78-103]; Q9D6F9 [78-103]; P99024 [78-103]	0	2798.34	0	100	Shared	High	High	0	3.176e-07	65	59.15	R.SGPFGQIFRPDNFVFGQSGAGNNWAK.G	[78-103]		Not Used
		Checked	Confidence	Identifying Node	PSM Ambiguity	Annotated Sequence	Modifications	# Protein Groups	# Proteins	Master Protein Accessions	Protein Accessions	# Missed Cleavages	Charge	DeltaScore	DeltaCn	Rank	Search Engine Rank	m/z [Da]	MH+ [Da]	Theo. MH+ [Da]	DeltaM [ppm]	Deltam/z [Da]	Activation Type	MS Order	Isolation Interference [%]	Ion Inject Time [ms]	RT [min]	First Scan	Spectrum File	File ID	Quan Info	Ions Score	Identity Strict	Identity Relaxed	Expectation Value	Percolator q-Value	Percolator PEP	Precursor Abundance	Apex RT [min]
		FALSE	High	Mascot (A5)	Unambiguous	[R].SGPFGQIFRPDNFVFGQSGAGNNWAK.[G]		3	5	Q7TMM9; Q9D6F9; P99024	Q7TMM9; Q9D6F9; P99024; P68372; Q9CWF2	0	3	1	0	1	1	933.461	2798.37	2798.34	8.89	0.0083	HCD (High Energy Collision Dissociation)	MS2	0	17.751	59.1226	41843	MS201900102_Con1.raw	F1		65	45	38	0.000103481	0	3.176e-07	10490575	59.15
	FALSE	High	[R].FPGQLNADLR.[K]			0.000171563	0	4	8	5	Q7TMM9; Q9D6F9; P99024; Q922F4	Q7TMM9 [242-251]; Q9D6F9 [242-251]; P99024 [242-251]; Q922F4 [242-251]	0	1130.6	0	100	Shared	High	High	0	0.0001439	63	29.5	R.FPGQLNADLR.K	[242-251]		Not Used
		Checked	Confidence	Identifying Node	PSM Ambiguity	Annotated Sequence	Modifications	# Protein Groups	# Proteins	Master Protein Accessions	Protein Accessions	# Missed Cleavages	Charge	DeltaScore	DeltaCn	Rank	Search Engine Rank	m/z [Da]	MH+ [Da]	Theo. MH+ [Da]	DeltaM [ppm]	Deltam/z [Da]	Activation Type	MS Order	Isolation Interference [%]	Ion Inject Time [ms]	RT [min]	First Scan	Spectrum File	File ID	Quan Info	Ions Score	Identity Strict	Identity Relaxed	Expectation Value	Percolator q-Value	Percolator PEP	Precursor Abundance	Apex RT [min]
		FALSE	High	Mascot (A5)	Unambiguous	[R].FPGQLNADLR.[K]		4	8	Q7TMM9; Q9D6F9; P99024; Q922F4	Q7TMM9; Q9D6F9; Q9ERD7; A2AQ07; P99024; P68372; Q9CWF2; Q922F4	0	2	0.873	0	1	1	565.804	1130.6	1130.6	5.6	0.00316	HCD (High Energy Collision Dissociation)	MS2	0	25	30.6335	15649	MS201900102_Con1.raw	F1		63	41	34	6.94402e-05	0	0.0001439
		FALSE	High	Mascot (A5)	Unambiguous	[R].FPGQLNADLR.[K]		4	8	Q7TMM9; Q9D6F9; P99024; Q922F4	Q7TMM9; Q9D6F9; Q9ERD7; A2AQ07; P99024; P68372; Q9CWF2; Q922F4	0	2	0.9444	0	1	1	565.805	1130.6	1130.6	6.57	0.00371	HCD (High Energy Collision Dissociation)	MS2	0	25	29.3383	14526	MS201900102_Con1.raw	F1		54	40	33	0.000444913	0	0.0001229	17558940	29.5
		FALSE	High	Mascot (A5)	Unambiguous	[R].FPGQLNADLR.[K]		4	8	Q7TMM9; Q9D6F9; P99024; Q922F4	Q7TMM9; Q9D6F9; Q9ERD7; A2AQ07; P99024; P68372; Q9CWF2; Q922F4	0	2	0.8913	0	1	1	565.806	1130.6	1130.6	8.08	0.00457	HCD (High Energy Collision Dissociation)	MS2	0	23.554	29.783	14897	MS201900102_Con1.raw	F1		46	40	33	0.00319532	0	0.001142	17558940	29.5
		FALSE	High	Mascot (A5)	Unambiguous	[R].FPGQLNADLR.[K]		4	8	Q7TMM9; Q9D6F9; P99024; Q922F4	Q7TMM9; Q9D6F9; Q9ERD7; A2AQ07; P99024; P68372; Q9CWF2; Q922F4	0	2	0.8621	0	1	1	565.806	1130.61	1130.6	8.94	0.00506	HCD (High Energy Collision Dissociation)	MS2	0	23.751	30.2062	15294	MS201900102_Con1.raw	F1		58	40	33	0.000175776	0	0.0003616
		FALSE	High	Mascot (A5)	Unambiguous	[R].FPGQLNADLR.[K]		4	8	Q7TMM9; Q9D6F9; P99024; Q922F4	Q7TMM9; Q9D6F9; Q9ERD7; A2AQ07; P99024; P68372; Q9CWF2; Q922F4	0	2	0.9615	0	1	1	565.805	1130.6	1130.6	6.68	0.00377	HCD (High Energy Collision Dissociation)	MS2	21.2557	19.898	31.369	16277	MS201900102_Con1.raw	F1		52	40	33	0.000757313	0.0004707	0.002299
	FALSE	High	[K].GHYTEGAELVDAVLDVVR.[K]			0.00177158	0	1	1	2	Q9D6F9	Q9D6F9 [104-121]	0	1942.99	0	100		High	High	0.0004707	0.005858	52	63.84	K.GHYTEGAELVDAVLDVVR.K	[104-121]		Used
		Checked	Confidence	Identifying Node	PSM Ambiguity	Annotated Sequence	Modifications	# Protein Groups	# Proteins	Master Protein Accessions	Protein Accessions	# Missed Cleavages	Charge	DeltaScore	DeltaCn	Rank	Search Engine Rank	m/z [Da]	MH+ [Da]	Theo. MH+ [Da]	DeltaM [ppm]	Deltam/z [Da]	Activation Type	MS Order	Isolation Interference [%]	Ion Inject Time [ms]	RT [min]	First Scan	Spectrum File	File ID	Quan Info	Ions Score	Identity Strict	Identity Relaxed	Expectation Value	Percolator q-Value	Percolator PEP	Precursor Abundance	Apex RT [min]
		FALSE	High	Mascot (A5)	Unambiguous	[K].GHYTEGAELVDAVLDVVR.[K]		1	1	Q9D6F9	Q9D6F9	0	3	1	0	1	1	648.339	1943	1942.99	7.81	0.00506	HCD (High Energy Collision Dissociation)	MS2	16.5242	25	64.1378	46967	MS201900102_Con1.raw	F1		49	42	35	0.00217713	0	0.001374	661233	63.84
		FALSE	High	Mascot (A5)	Unambiguous	[K].GHYTEGAELVDAVLDVVR.[K]		1	1	Q9D6F9	Q9D6F9	0	3	1	0	1	1	648.339	1943	1942.99	8.09	0.00524	HCD (High Energy Collision Dissociation)	MS2	0	25	63.6705	46431	MS201900102_Con1.raw	F1		52	42	35	0.00100518	0.0004707	0.005858	661233	63.84
	FALSE	High	[K].LAVNMVPFPR.[L]	1xOxidation [M5]		0.000717206	0	4	8	3	Q7TMM9; Q9D6F9; P99024; Q922F4	Q7TMM9 [253-262]; Q9D6F9 [253-262]; P99024 [253-262]; Q922F4 [253-262]	0	1159.63	0	100	Shared	High	High	0	0.0005401	44	33.45	K.LAVNMVPFPR.L	[253-262]		Not Used
		Checked	Confidence	Identifying Node	PSM Ambiguity	Annotated Sequence	Modifications	# Protein Groups	# Proteins	Master Protein Accessions	Protein Accessions	# Missed Cleavages	Charge	DeltaScore	DeltaCn	Rank	Search Engine Rank	m/z [Da]	MH+ [Da]	Theo. MH+ [Da]	DeltaM [ppm]	Deltam/z [Da]	Activation Type	MS Order	Isolation Interference [%]	Ion Inject Time [ms]	RT [min]	First Scan	Spectrum File	File ID	Quan Info	Ions Score	Identity Strict	Identity Relaxed	Expectation Value	Percolator q-Value	Percolator PEP	Precursor Abundance	Apex RT [min]
		FALSE	High	Mascot (A5)	Unambiguous	[K].LAVNmVPFPR.[L]	M5(Oxidation)	4	8	Q7TMM9; Q9D6F9; P99024; Q922F4	Q7TMM9; Q9D6F9; Q9ERD7; A2AQ07; P99024; P68372; Q9CWF2; Q922F4	0	2	0.9773	0	1	1	580.323	1159.64	1159.63	9.03	0.00523	HCD (High Energy Collision Dissociation)	MS2	0	25	33.6167	18108	MS201900102_Con1.raw	F1		44	39	32	0.00386819	0	0.0005401	7107877	33.45
		FALSE	High	Mascot (A5)	Unambiguous	[K].LAVNmVPFPR.[L]	M5(Oxidation)	4	8	Q7TMM9; Q9D6F9; P99024; Q922F4	Q7TMM9; Q9D6F9; Q9ERD7; A2AQ07; P99024; P68372; Q9CWF2; Q922F4	0	2	1	0	1	1	580.33	1159.65	1159.63	19.56	0.01134	HCD (High Energy Collision Dissociation)	MS2	25.9586	12.021	32.878	17551	MS201900102_Con1.raw	F1	Not Reliable	41	38	31	0.00630451	0	0.0008969
		FALSE	High	Mascot (A5)	Unambiguous	[K].LAVNmVPFPR.[L]	M5(Oxidation)	4	8	Q7TMM9; Q9D6F9; P99024; Q922F4	Q7TMM9; Q9D6F9; Q9ERD7; A2AQ07; P99024; P68372; Q9CWF2; Q922F4	0	2	0.9756	0	1	1	580.324	1159.64	1159.63	9.13	0.0053	HCD (High Energy Collision Dissociation)	MS2	18.7899	19.629	33.1542	17745	MS201900102_Con1.raw	F1		41	39	32	0.00771805	0.0004707	0.005392	6.20909e+06	32.98
	FALSE	High	[R].IMNTFSVVPSPK.[V]			0.000702278	0	2	4	2	Q9D6F9; P99024	Q9D6F9 [163-174]; P99024 [163-174]	0	1319.7	0	100	Shared	High	High	0	0.0005279	37	34.36	R.IMNTFSVVPSPK.V	[163-174]		Not Used
		Checked	Confidence	Identifying Node	PSM Ambiguity	Annotated Sequence	Modifications	# Protein Groups	# Proteins	Master Protein Accessions	Protein Accessions	# Missed Cleavages	Charge	DeltaScore	DeltaCn	Rank	Search Engine Rank	m/z [Da]	MH+ [Da]	Theo. MH+ [Da]	DeltaM [ppm]	Deltam/z [Da]	Activation Type	MS Order	Isolation Interference [%]	Ion Inject Time [ms]	RT [min]	First Scan	Spectrum File	File ID	Quan Info	Ions Score	Identity Strict	Identity Relaxed	Expectation Value	Percolator q-Value	Percolator PEP	Precursor Abundance	Apex RT [min]
		FALSE	High	Mascot (A5)	Unambiguous	[R].IMNTFSVVPSPK.[V]		2	4	Q9D6F9; P99024	Q9D6F9; Q9ERD7; P99024; P68372	0	2	1	0	1	1	660.359	1319.71	1319.7	6.31	0.00416	HCD (High Energy Collision Dissociation)	MS2	54.9899	4.413	34.4263	18775	MS201900102_Con1.raw	F1		37	39	32	0.0197294	0	0.0005279	25236126	34.36
		FALSE	High	Mascot (A5)	Unambiguous	[R].IMNTFSVVPSPK.[V]		2	4	Q9D6F9; P99024	Q9D6F9; Q9ERD7; P99024; P68372	0	2	1	0	1	1	660.359	1319.71	1319.7	5.94	0.00392	HCD (High Energy Collision Dissociation)	MS2		4.475	34.0035	18431	MS201900102_Con1.raw	F1		12	39	32	5.62487	0.004901	0.1636	25236126	34.36
	FALSE	High	[R].ISEQFTAMFR.[R]			0.000932872	0	3	6	2	Q7TMM9; Q9D6F9; P99024	Q7TMM9 [381-390]; Q9D6F9 [381-390]; P99024 [381-390]	0	1229.6	0	100	Shared	High	High	0.0004707	0.001787	62	40.51	R.ISEQFTAMFR.R	[381-390]		Not Used
		Checked	Confidence	Identifying Node	PSM Ambiguity	Annotated Sequence	Modifications	# Protein Groups	# Proteins	Master Protein Accessions	Protein Accessions	# Missed Cleavages	Charge	DeltaScore	DeltaCn	Rank	Search Engine Rank	m/z [Da]	MH+ [Da]	Theo. MH+ [Da]	DeltaM [ppm]	Deltam/z [Da]	Activation Type	MS Order	Isolation Interference [%]	Ion Inject Time [ms]	RT [min]	First Scan	Spectrum File	File ID	Quan Info	Ions Score	Identity Strict	Identity Relaxed	Expectation Value	Percolator q-Value	Percolator PEP	Precursor Abundance	Apex RT [min]
		FALSE	High	Mascot (A5)	Unambiguous	[R].ISEQFTAMFR.[R]		3	6	Q7TMM9; Q9D6F9; P99024	Q7TMM9; Q9D6F9; Q9ERD7; P99024; P68372; Q9CWF2	0	2	0.8136	0	1	1	615.308	1229.61	1229.6	7.64	0.0047	HCD (High Energy Collision Dissociation)	MS2	0	25	40.3305	25233	MS201900102_Con1.raw	F1		59	41	34	0.000184969	0	0.0007067	12233424	40.51
		FALSE	High	Mascot (A5)	Unambiguous	[R].ISEQFTAMFR.[R]		3	6	Q7TMM9; Q9D6F9; P99024	Q7TMM9; Q9D6F9; Q9ERD7; P99024; P68372; Q9CWF2	0	2	0.8065	0	1	1	615.308	1229.61	1229.6	7.94	0.00488	HCD (High Energy Collision Dissociation)	MS2	0	25	40.7827	25776	MS201900102_Con1.raw	F1		62	41	34	8.45794e-05	0.0004707	0.001787	12233424	40.51
	FALSE	High	[K].MAATFIGNSTAIQELFK.[R]	1xOxidation [M1]		3.39229e-06	0	1	1	2	Q9D6F9	Q9D6F9 [363-379]	0	1857.94	1	100		High	High	0	2.13e-06	55	61.33	K.MAATFIGNSTAIQELFK.R	[363-379]		Used
		Checked	Confidence	Identifying Node	PSM Ambiguity	Annotated Sequence	Modifications	# Protein Groups	# Proteins	Master Protein Accessions	Protein Accessions	# Missed Cleavages	Charge	DeltaScore	DeltaCn	Rank	Search Engine Rank	m/z [Da]	MH+ [Da]	Theo. MH+ [Da]	DeltaM [ppm]	Deltam/z [Da]	Activation Type	MS Order	Isolation Interference [%]	Ion Inject Time [ms]	RT [min]	First Scan	Spectrum File	File ID	Quan Info	Ions Score	Identity Strict	Identity Relaxed	Expectation Value	Percolator q-Value	Percolator PEP	Precursor Abundance	Apex RT [min]
		FALSE	High	Mascot (A5)	Selected	[K].mAATFIGNSTAIQELFK.[R]	M1(Oxidation)	1	1	Q9D6F9	Q9D6F9	0	2	0	0	1	1	929.482	1857.96	1857.94	8.25	0.00766	HCD (High Energy Collision Dissociation)	MS2	46.6929	15.248	61.4866	44021	MS201900102_Con1.raw	F1		55	42	35	0.000510181	0	2.13e-06	4997223	61.33
		FALSE	High	Mascot (A5)	Selected	[K].mAATFIGNSTAIQELFK.[R]	M1(Oxidation)	1	1	Q9D6F9	Q9D6F9	0	2	0	0	1	1	929.484	1857.96	1857.94	10.68	0.00992	HCD (High Energy Collision Dissociation)	MS2	46.5209	25	61.0442	43616	MS201900102_Con1.raw	F1		23	42	35	0.87572	0.0004707	0.002622	4997223	61.33
	FALSE	High	[K].LAVNMVPFPR.[L]			0.000817964	0	4	8	3	Q7TMM9; Q9D6F9; P99024; Q922F4	Q7TMM9 [253-262]; Q9D6F9 [253-262]; P99024 [253-262]; Q922F4 [253-262]	0	1143.63	0	100	Shared	High	High	0	0.0006193	52	40.39	K.LAVNMVPFPR.L	[253-262]		Not Used
		Checked	Confidence	Identifying Node	PSM Ambiguity	Annotated Sequence	Modifications	# Protein Groups	# Proteins	Master Protein Accessions	Protein Accessions	# Missed Cleavages	Charge	DeltaScore	DeltaCn	Rank	Search Engine Rank	m/z [Da]	MH+ [Da]	Theo. MH+ [Da]	DeltaM [ppm]	Deltam/z [Da]	Activation Type	MS Order	Isolation Interference [%]	Ion Inject Time [ms]	RT [min]	First Scan	Spectrum File	File ID	Quan Info	Ions Score	Identity Strict	Identity Relaxed	Expectation Value	Percolator q-Value	Percolator PEP	Precursor Abundance	Apex RT [min]
		FALSE	High	Mascot (A5)	Unambiguous	[K].LAVNMVPFPR.[L]		4	8	Q7TMM9; Q9D6F9; P99024; Q922F4	Q7TMM9; Q9D6F9; Q9ERD7; A2AQ07; P99024; P68372; Q9CWF2; Q922F4	0	2	0.8077	0	1	1	572.325	1143.64	1143.63	8.02	0.00458	HCD (High Energy Collision Dissociation)	MS2	10.7246	25	40.668	25642	MS201900102_Con1.raw	F1		52	39	32	0.000495343	0	0.0006193	17076352	40.39
		FALSE	High	Mascot (A5)	Unambiguous	[K].LAVNMVPFPR.[L]		4	8	Q7TMM9; Q9D6F9; P99024; Q922F4	Q7TMM9; Q9D6F9; Q9ERD7; A2AQ07; P99024; P68372; Q9CWF2; Q922F4	0	2	0.8039	0	1	1	572.324	1143.64	1143.63	4.92	0.00281	HCD (High Energy Collision Dissociation)	MS2	50.3912	25	40.189	25062	MS201900102_Con1.raw	F1		51	39	32	0.000679781	0.0004707	0.003236	17076352	40.39
		FALSE	High	Mascot (A5)	Unambiguous	[K].LAVNMVPFPR.[L]		4	8	Q7TMM9; Q9D6F9; P99024; Q922F4	Q7TMM9; Q9D6F9; Q9ERD7; A2AQ07; P99024; P68372; Q9CWF2; Q922F4	0	2	0.7778	0	1	1	572.311	1143.62	1143.63	-16.75	-0.00958	HCD (High Energy Collision Dissociation)	MS2	54.1231	25	40.9494	25978	MS201900102_Con1.raw	F1		36	40	33	0.030704	0.0004707	0.001928
	FALSE	High	[K].NSSYFVEWIPNNVK.[TV]			0.000288762	0	4	7	1	Q7TMM9; Q9D6F9; P99024; Q922F4	Q7TMM9 [337-350]; Q9D6F9 [337-350]; P99024 [337-350]; Q922F4 [337-350]	0	1696.83	0	100	Shared	High	High	0	0.0002107	46	49.2	K.NSSYFVEWIPNNVK.T	[337-350]		Not Used
		Checked	Confidence	Identifying Node	PSM Ambiguity	Annotated Sequence	Modifications	# Protein Groups	# Proteins	Master Protein Accessions	Protein Accessions	# Missed Cleavages	Charge	DeltaScore	DeltaCn	Rank	Search Engine Rank	m/z [Da]	MH+ [Da]	Theo. MH+ [Da]	DeltaM [ppm]	Deltam/z [Da]	Activation Type	MS Order	Isolation Interference [%]	Ion Inject Time [ms]	RT [min]	First Scan	Spectrum File	File ID	Quan Info	Ions Score	Identity Strict	Identity Relaxed	Expectation Value	Percolator q-Value	Percolator PEP	Precursor Abundance	Apex RT [min]
		FALSE	High	Mascot (A5)	Unambiguous	[K].NSSYFVEWIPNNVK.[TV]		4	7	Q7TMM9; Q9D6F9; P99024; Q922F4	Q7TMM9; Q9D6F9; Q9ERD7; P99024; P68372; Q9CWF2; Q922F4	0	2	0.9565	0	1	1	848.929	1696.85	1696.83	10.14	0.0086	HCD (High Energy Collision Dissociation)	MS2	18.2472	24.824	49.0208	35019	MS201900102_Con1.raw	F1		46	42	35	0.0051057	0	0.0002107	38086028	49.2
	FALSE	High	[R].LHFFMPGFAPLTSR.[G]			0.00210709	0	3	5	1	Q7TMM9; Q9D6F9; P99024	Q7TMM9 [263-276]; Q9D6F9 [263-276]; P99024 [263-276]	0	1620.84	0	100	Shared	High	High	0	0.001642	44	49.43	R.LHFFMPGFAPLTSR.G	[263-276]		Not Used
		Checked	Confidence	Identifying Node	PSM Ambiguity	Annotated Sequence	Modifications	# Protein Groups	# Proteins	Master Protein Accessions	Protein Accessions	# Missed Cleavages	Charge	DeltaScore	DeltaCn	Rank	Search Engine Rank	m/z [Da]	MH+ [Da]	Theo. MH+ [Da]	DeltaM [ppm]	Deltam/z [Da]	Activation Type	MS Order	Isolation Interference [%]	Ion Inject Time [ms]	RT [min]	First Scan	Spectrum File	File ID	Quan Info	Ions Score	Identity Strict	Identity Relaxed	Expectation Value	Percolator q-Value	Percolator PEP	Precursor Abundance	Apex RT [min]
		FALSE	High	Mascot (A5)	Unambiguous	[R].LHFFMPGFAPLTSR.[G]		3	5	Q7TMM9; Q9D6F9; P99024	Q7TMM9; Q9D6F9; P99024; P68372; Q9CWF2	0	2	0.7045	0	1	1	810.928	1620.85	1620.84	8.11	0.00658	HCD (High Energy Collision Dissociation)	MS2	0	25	49.3915	35427	MS201900102_Con1.raw	F1		44	41	34	0.00527559	0	0.001642	5.77768e+06	49.43
	FALSE	High	[R].LHFFMPGFAPLTSR.[G]	1xOxidation [M5]		3.27295e-05	0	3	5	2	Q7TMM9; Q9D6F9; P99024	Q7TMM9 [263-276]; Q9D6F9 [263-276]; P99024 [263-276]	0	1636.83	0	100	Shared	High	High	0	2.22e-05	49	43.39	R.LHFFMPGFAPLTSR.G	[263-276]		Not Used
		Checked	Confidence	Identifying Node	PSM Ambiguity	Annotated Sequence	Modifications	# Protein Groups	# Proteins	Master Protein Accessions	Protein Accessions	# Missed Cleavages	Charge	DeltaScore	DeltaCn	Rank	Search Engine Rank	m/z [Da]	MH+ [Da]	Theo. MH+ [Da]	DeltaM [ppm]	Deltam/z [Da]	Activation Type	MS Order	Isolation Interference [%]	Ion Inject Time [ms]	RT [min]	First Scan	Spectrum File	File ID	Quan Info	Ions Score	Identity Strict	Identity Relaxed	Expectation Value	Percolator q-Value	Percolator PEP	Precursor Abundance	Apex RT [min]
		FALSE	High	Mascot (A5)	Unambiguous	[R].LHFFmPGFAPLTSR.[G]	M5(Oxidation)	3	5	Q7TMM9; Q9D6F9; P99024	Q7TMM9; Q9D6F9; P99024; P68372; Q9CWF2	0	3	1	0	1	1	546.288	1636.85	1636.83	11.77	0.00642	HCD (High Energy Collision Dissociation)	MS2	15.5237	25	43.2517	28634	MS201900102_Con1.raw	F1		49	41	34	0.00197796	0	2.22e-05	3.54724e+06	43.39
		FALSE	High	Mascot (A5)	Unambiguous	[R].LHFFmPGFAPLTSR.[G]	M5(Oxidation)	3	5	Q7TMM9; Q9D6F9; P99024	Q7TMM9; Q9D6F9; P99024; P68372; Q9CWF2	0	3	1	0	1	1	546.286	1636.84	1636.83	8.75	0.00477	HCD (High Energy Collision Dissociation)	MS2	81.8011	25	43.7275	29199	MS201900102_Con1.raw	F1		12	41	34	9.80028	0.0004707	0.01803	3.54724e+06	43.39
	FALSE	High	[R].AVLVDLEPGTMDSVR.[S]			2.28887e-05	0	1	2	1	Q9D6F9	Q9D6F9 [63-77]	0	1601.82	0	100		High	High	0	1.53e-05	56	42.07	R.AVLVDLEPGTMDSVR.S	[63-77]		Used
		Checked	Confidence	Identifying Node	PSM Ambiguity	Annotated Sequence	Modifications	# Protein Groups	# Proteins	Master Protein Accessions	Protein Accessions	# Missed Cleavages	Charge	DeltaScore	DeltaCn	Rank	Search Engine Rank	m/z [Da]	MH+ [Da]	Theo. MH+ [Da]	DeltaM [ppm]	Deltam/z [Da]	Activation Type	MS Order	Isolation Interference [%]	Ion Inject Time [ms]	RT [min]	First Scan	Spectrum File	File ID	Quan Info	Ions Score	Identity Strict	Identity Relaxed	Expectation Value	Percolator q-Value	Percolator PEP	Precursor Abundance	Apex RT [min]
		FALSE	High	Mascot (A5)	Unambiguous	[R].AVLVDLEPGTMDSVR.[S]		1	2	Q9D6F9	Q9D6F9; P68372	0	2	0.8929	0	1	1	801.42	1601.83	1601.82	8.17	0.00654	HCD (High Energy Collision Dissociation)	MS2	0	25	41.8929	27034	MS201900102_Con1.raw	F1		56	41	34	0.000376493	0	1.53e-05	12994400	42.07
	FALSE	High	[R].ALTVPELTQQMFDAK.[N]	1xOxidation [M11]		0.00066281	0	2	4	2	Q9D6F9; Q922F4	Q9D6F9 [283-297]; Q922F4 [283-297]	0	1707.86	0	100	Shared	High	High	0	0.0004983	26	40.34	R.ALTVPELTQQMFDAK.N	[283-297]		Used
		Checked	Confidence	Identifying Node	PSM Ambiguity	Annotated Sequence	Modifications	# Protein Groups	# Proteins	Master Protein Accessions	Protein Accessions	# Missed Cleavages	Charge	DeltaScore	DeltaCn	Rank	Search Engine Rank	m/z [Da]	MH+ [Da]	Theo. MH+ [Da]	DeltaM [ppm]	Deltam/z [Da]	Activation Type	MS Order	Isolation Interference [%]	Ion Inject Time [ms]	RT [min]	First Scan	Spectrum File	File ID	Quan Info	Ions Score	Identity Strict	Identity Relaxed	Expectation Value	Percolator q-Value	Percolator PEP	Precursor Abundance	Apex RT [min]
		FALSE	High	Mascot (A5)	Unambiguous	[R].ALTVPELTQQmFDAK.[N]	M11(Oxidation)	2	4	Q9D6F9; Q922F4	Q9D6F9; Q9ERD7; P68372; Q922F4	0	2	0.5769	0	1	1	854.44	1707.87	1707.86	6.67	0.00569	HCD (High Energy Collision Dissociation)	MS2	30.2103	25	40.6021	25560	MS201900102_Con1.raw	F1		26	42	35	0.385868	0	0.0004983	2367469	40.34
		FALSE	High	Mascot (A5)	Unambiguous	[R].ALTVPELTQQmFDAK.[N]	M11(Oxidation)	2	4	Q9D6F9; Q922F4	Q9D6F9; Q9ERD7; P68372; Q922F4	0	2	0.8696	0	1	1	854.442	1707.88	1707.86	7.95	0.00679	HCD (High Energy Collision Dissociation)	MS2	35.7216	25	40.1419	25004	MS201900102_Con1.raw	F1		23	42	35	0.853564	0	0.0005076	2367469	40.34
	FALSE	High	[R].YLTVAAVFR.[G]			0.00763379	0.000581891	2	3	2	Q9D6F9; P99024	Q9D6F9 [310-318]; P99024 [310-318]	0	1039.59	0	100	Shared	High	High	0.0004707	0.006214	49	39.96	R.YLTVAAVFR.G	[310-318]		Not Used
		Checked	Confidence	Identifying Node	PSM Ambiguity	Annotated Sequence	Modifications	# Protein Groups	# Proteins	Master Protein Accessions	Protein Accessions	# Missed Cleavages	Charge	DeltaScore	DeltaCn	Rank	Search Engine Rank	m/z [Da]	MH+ [Da]	Theo. MH+ [Da]	DeltaM [ppm]	Deltam/z [Da]	Activation Type	MS Order	Isolation Interference [%]	Ion Inject Time [ms]	RT [min]	First Scan	Spectrum File	File ID	Quan Info	Ions Score	Identity Strict	Identity Relaxed	Expectation Value	Percolator q-Value	Percolator PEP	Precursor Abundance	Apex RT [min]
		FALSE	High	Mascot (A5)	Unambiguous	[R].YLTVAAVFR.[G]		2	3	Q9D6F9; P99024	Q9D6F9; P99024; P68372	0	2	0.8776	0	1	1	520.304	1039.6	1039.59	7.46	0.00388	HCD (High Energy Collision Dissociation)	MS2	34.0626	25	39.7757	24561	MS201900102_Con1.raw	F1		49	34	27	0.000377678	0.0004707	0.006214	18000516	39.96
		FALSE	High	Mascot (A5)	Unambiguous	[R].YLTVAAVFR.[G]		2	3	Q9D6F9; P99024	Q9D6F9; P99024; P68372	0	2	0.8125	0	1	1	520.304	1039.6	1039.59	7.57	0.00394	HCD (High Energy Collision Dissociation)	MS2	47.2673	25	40.2841	25176	MS201900102_Con1.raw	F1		16	34	27	0.845515	0.0004707	0.00626	18000516	39.96
	FALSE	High	[R].KLAVNMVPFPR.[L]			0.00317456	0.000581891	4	8	1	Q7TMM9; Q9D6F9; P99024; Q922F4	Q7TMM9 [252-262]; Q9D6F9 [252-262]; P99024 [252-262]; Q922F4 [252-262]	1	1271.73	0		No Quan Values	High	High	0.0004707	0.002517	56		R.KLAVNMVPFPR.L	[252-262]		Not Used
		Checked	Confidence	Identifying Node	PSM Ambiguity	Annotated Sequence	Modifications	# Protein Groups	# Proteins	Master Protein Accessions	Protein Accessions	# Missed Cleavages	Charge	DeltaScore	DeltaCn	Rank	Search Engine Rank	m/z [Da]	MH+ [Da]	Theo. MH+ [Da]	DeltaM [ppm]	Deltam/z [Da]	Activation Type	MS Order	Isolation Interference [%]	Ion Inject Time [ms]	RT [min]	First Scan	Spectrum File	File ID	Quan Info	Ions Score	Identity Strict	Identity Relaxed	Expectation Value	Percolator q-Value	Percolator PEP	Precursor Abundance	Apex RT [min]
		FALSE	High	Mascot (A5)	Unambiguous	[R].KLAVNMVPFPR.[L]		4	8	Q7TMM9; Q9D6F9; P99024; Q922F4	Q7TMM9; Q9D6F9; Q9ERD7; A2AQ07; P99024; P68372; Q9CWF2; Q922F4	1	2	0.8036	0	1	1	636.373	1271.74	1271.73	7.7	0.00489	HCD (High Energy Collision Dissociation)	MS2	0	12.963	32.1238	16924	MS201900102_Con1.raw	F1		56	37	30	0.000133761	0.0004707	0.002517	5.95369e+06	32.21
	FALSE	High	[R].AVLVDLEPGTMDSVR.[S]	1xOxidation [M11]		0.00808792	0.000581891	1	2	1	Q9D6F9	Q9D6F9 [63-77]	0	1617.82	0	100		High	High	0.0004707	0.006596	24	35.5	R.AVLVDLEPGTMDSVR.S	[63-77]		Used
		Checked	Confidence	Identifying Node	PSM Ambiguity	Annotated Sequence	Modifications	# Protein Groups	# Proteins	Master Protein Accessions	Protein Accessions	# Missed Cleavages	Charge	DeltaScore	DeltaCn	Rank	Search Engine Rank	m/z [Da]	MH+ [Da]	Theo. MH+ [Da]	DeltaM [ppm]	Deltam/z [Da]	Activation Type	MS Order	Isolation Interference [%]	Ion Inject Time [ms]	RT [min]	First Scan	Spectrum File	File ID	Quan Info	Ions Score	Identity Strict	Identity Relaxed	Expectation Value	Percolator q-Value	Percolator PEP	Precursor Abundance	Apex RT [min]
		FALSE	High	Mascot (A5)	Unambiguous	[R].AVLVDLEPGTmDSVR.[S]	M11(Oxidation)	1	2	Q9D6F9	Q9D6F9; P68372	0	2	1	0	1	1	809.413	1617.82	1617.82	2.56	0.00207	HCD (High Energy Collision Dissociation)	MS2	0	17.19	35.3069	19503	MS201900102_Con1.raw	F1		24	42	35	0.680704	0.0004707	0.006596	8.10114e+06	35.5
	FALSE	High	[R].ISEQFTAMFR.[R]	1xOxidation [M8]		0.010684	0.000581891	3	6	1	Q7TMM9; Q9D6F9; P99024	Q7TMM9 [381-390]; Q9D6F9 [381-390]; P99024 [381-390]	0	1245.59	0	100	Shared	High	High	0.0004707	0.008789	22	31.2	R.ISEQFTAMFR.R	[381-390]		Not Used
		Checked	Confidence	Identifying Node	PSM Ambiguity	Annotated Sequence	Modifications	# Protein Groups	# Proteins	Master Protein Accessions	Protein Accessions	# Missed Cleavages	Charge	DeltaScore	DeltaCn	Rank	Search Engine Rank	m/z [Da]	MH+ [Da]	Theo. MH+ [Da]	DeltaM [ppm]	Deltam/z [Da]	Activation Type	MS Order	Isolation Interference [%]	Ion Inject Time [ms]	RT [min]	First Scan	Spectrum File	File ID	Quan Info	Ions Score	Identity Strict	Identity Relaxed	Expectation Value	Percolator q-Value	Percolator PEP	Precursor Abundance	Apex RT [min]
		FALSE	High	Mascot (A5)	Unambiguous	[R].ISEQFTAmFR.[R]	M8(Oxidation)	3	6	Q7TMM9; Q9D6F9; P99024	Q7TMM9; Q9D6F9; Q9ERD7; P99024; P68372; Q9CWF2	0	2	1	0	1	1	623.305	1245.6	1245.59	7.21	0.00449	HCD (High Energy Collision Dissociation)	MS2		6.509	31.0628	16009	MS201900102_Con1.raw	F1		22	41	34	0.832566	0.0004707	0.008789	10564331	31.2
	FALSE	High	[R].IMNTFSVVPSPK.[V]	1xOxidation [M2]		0.0096694	0.000581891	2	4	1	Q9D6F9; P99024	Q9D6F9 [163-174]; P99024 [163-174]	0	1335.7	0	100	Shared	High	High	0.0004707	0.007934	43	29.47	R.IMNTFSVVPSPK.V	[163-174]		Not Used
		Checked	Confidence	Identifying Node	PSM Ambiguity	Annotated Sequence	Modifications	# Protein Groups	# Proteins	Master Protein Accessions	Protein Accessions	# Missed Cleavages	Charge	DeltaScore	DeltaCn	Rank	Search Engine Rank	m/z [Da]	MH+ [Da]	Theo. MH+ [Da]	DeltaM [ppm]	Deltam/z [Da]	Activation Type	MS Order	Isolation Interference [%]	Ion Inject Time [ms]	RT [min]	First Scan	Spectrum File	File ID	Quan Info	Ions Score	Identity Strict	Identity Relaxed	Expectation Value	Percolator q-Value	Percolator PEP	Precursor Abundance	Apex RT [min]
		FALSE	High	Mascot (A5)	Unambiguous	[R].ImNTFSVVPSPK.[V]	M2(Oxidation)	2	4	Q9D6F9; P99024	Q9D6F9; Q9ERD7; P99024; P68372	0	2	1	0	1	1	668.358	1335.71	1335.7	7.57	0.00506	HCD (High Energy Collision Dissociation)	MS2	55.7896	8.713	29.5158	14677	MS201900102_Con1.raw	F1		43	40	33	0.00570602	0.0004707	0.007934	10671408	29.47
FALSE	High	Master Protein	Q61656	Probable ATP-dependent RNA helicase DDX5 OS=Mus musculus OX=10090 GN=Ddx5 PE=1 SV=2	0	60.952	33	20	37	16	1	614	69.2	8.92	808	20	cell differentiation;cell organization and biogenesis;metabolic process;regulation of biological process;response to stimulus	cytoplasm;membrane;nucleus;spliceosomal complex	catalytic activity;nucleotide binding;protein binding;RNA binding	Pf00270, Pf00271, Pf08061	13207		Ddx5	11	mRNA processing		6	100	High
	Checked	Confidence	Annotated Sequence	Modifications	Modifications in Master Proteins	Qvality PEP	Qvality q-value	# Protein Groups	# Proteins	# PSMs	Master Protein Accessions	Positions in Master Proteins	# Missed Cleavages	Theo. MH+ [Da]	# Razor Quan Results	Abundances (Scaled): F1: Sample	Quan Info	Found in Sample: [S1] F1: Sample	Confidence (by Search Engine): Mascot	Percolator q-Value (by Search Engine): Mascot	Percolator PEP (by Search Engine): Mascot	Ions Score (by Search Engine): Mascot	Top Apex RT [min]	Sequence in Protein	Positions in Protein	Peptide Group Modifications in Protein	Quan Usage
	FALSE	High	[K].QVSDLISVLR.[E]			0.00145082	0	1	1	3	Q61656	Q61656 [452-461]	0	1129.66	0	100		High	High	0	0.001121	62	43.28	K.QVSDLISVLR.E	[452-461]		Used
		Checked	Confidence	Identifying Node	PSM Ambiguity	Annotated Sequence	Modifications	# Protein Groups	# Proteins	Master Protein Accessions	Protein Accessions	# Missed Cleavages	Charge	DeltaScore	DeltaCn	Rank	Search Engine Rank	m/z [Da]	MH+ [Da]	Theo. MH+ [Da]	DeltaM [ppm]	Deltam/z [Da]	Activation Type	MS Order	Isolation Interference [%]	Ion Inject Time [ms]	RT [min]	First Scan	Spectrum File	File ID	Quan Info	Ions Score	Identity Strict	Identity Relaxed	Expectation Value	Percolator q-Value	Percolator PEP	Precursor Abundance	Apex RT [min]
		FALSE	High	Mascot (A5)	Unambiguous	[K].QVSDLISVLR.[E]		1	1	Q61656	Q61656	0	2	0.871	0	1	1	565.337	1129.67	1129.66	8.73	0.00493	HCD (High Energy Collision Dissociation)	MS2	8.82708	25	43.6154	29069	MS201900102_Con1.raw	F1		62	36	29	3.28243e-05	0	0.001121	15543612	43.28
		FALSE	High	Mascot (A5)	Unambiguous	[K].QVSDLISVLR.[E]		1	1	Q61656	Q61656	0	2	0.8913	0	1	1	565.337	1129.67	1129.66	8.4	0.00475	HCD (High Energy Collision Dissociation)	MS2	0	20.714	43.1959	28573	MS201900102_Con1.raw	F1		46	36	29	0.0013202	0.0004707	0.003227	15543612	43.28
		FALSE	High	Mascot (A5)	Unambiguous	[K].QVSDLISVLR.[E]		1	1	Q61656	Q61656	0	2	0.8431	0	1	1	565.337	1129.67	1129.66	8.19	0.00462	HCD (High Energy Collision Dissociation)	MS2	27.1165	25	43.6643	29127	MS201900102_Con1.raw	F1		51	36	29	0.00040424	0.0004707	0.00243	15543612	43.28
	FALSE	High	[K].FVINYDYPNSSEDYIHR.[I]			8.46232e-07	0	1	1	3	Q61656	Q61656 [412-428]	0	2131.97	0	100		High	High	0	2.171e-06	89	39.22	K.FVINYDYPNSSEDYIHR.I	[412-428]		Used
		Checked	Confidence	Identifying Node	PSM Ambiguity	Annotated Sequence	Modifications	# Protein Groups	# Proteins	Master Protein Accessions	Protein Accessions	# Missed Cleavages	Charge	DeltaScore	DeltaCn	Rank	Search Engine Rank	m/z [Da]	MH+ [Da]	Theo. MH+ [Da]	DeltaM [ppm]	Deltam/z [Da]	Activation Type	MS Order	Isolation Interference [%]	Ion Inject Time [ms]	RT [min]	First Scan	Spectrum File	File ID	Quan Info	Ions Score	Identity Strict	Identity Relaxed	Expectation Value	Percolator q-Value	Percolator PEP	Precursor Abundance	Apex RT [min]
		FALSE	High	Mascot (A5)	Unambiguous	[K].FVINYDYPNSSEDYIHR.[I]		1	1	Q61656	Q61656	0	3	1	0	1	1	711.335	2131.99	2131.97	8.79	0.00625	HCD (High Energy Collision Dissociation)	MS2	1.40818	16.439	39.4379	24168	MS201900102_Con1.raw	F1		79	45	38	3.81456e-06	0	5.078e-07	11758560	39.22
		FALSE	High	Mascot (A5)	Unambiguous	[K].FVINYDYPNSSEDYIHR.[I]		1	1	Q61656	Q61656	0	3	1	0	1	1	711.335	2131.99	2131.97	9.22	0.00655	HCD (High Energy Collision Dissociation)	MS2	71.2912	25	38.9852	23622	MS201900102_Con1.raw	F1		67	45	38	7.0605e-05	0	2.535e-06	11758560	39.22
		FALSE	High	Mascot (A5)	Unambiguous	[K].FVINYDYPNSSEDYIHR.[I]		1	1	Q61656	Q61656	0	2	1	0	1	1	1066.5	2132	2131.97	11.11	0.01185	HCD (High Energy Collision Dissociation)	MS2	0	25	39.4902	24229	MS201900102_Con1.raw	F1		89	45	38	3.82008e-07	0	2.171e-06	4.10987e+06	39.21
	FALSE	High	[K].TGTAYTFFTPNNIK.[Q]			0.000133287	0	1	1	2	Q61656	Q61656 [438-451]	0	1574.78	0	100		High	High	0	9.465e-05	24	39.49	K.TGTAYTFFTPNNIK.Q	[438-451]		Used
		Checked	Confidence	Identifying Node	PSM Ambiguity	Annotated Sequence	Modifications	# Protein Groups	# Proteins	Master Protein Accessions	Protein Accessions	# Missed Cleavages	Charge	DeltaScore	DeltaCn	Rank	Search Engine Rank	m/z [Da]	MH+ [Da]	Theo. MH+ [Da]	DeltaM [ppm]	Deltam/z [Da]	Activation Type	MS Order	Isolation Interference [%]	Ion Inject Time [ms]	RT [min]	First Scan	Spectrum File	File ID	Quan Info	Ions Score	Identity Strict	Identity Relaxed	Expectation Value	Percolator q-Value	Percolator PEP	Precursor Abundance	Apex RT [min]
		FALSE	High	Mascot (A5)	Unambiguous	[K].TGTAYTFFTPNNIK.[Q]		1	1	Q61656	Q61656	0	2	1	0	1	1	787.904	1574.8	1574.78	9.55	0.00752	HCD (High Energy Collision Dissociation)	MS2	27.9705	16.171	39.6899	24458	MS201900102_Con1.raw	F1		24	42	35	0.629263	0	9.465e-05	16852690	39.49
		FALSE	High	Mascot (A5)	Unambiguous	[K].TGTAYTFFTPNNIK.[Q]		1	1	Q61656	Q61656	0	2	1	0	1	1	787.902	1574.8	1574.78	7.46	0.00587	HCD (High Energy Collision Dissociation)	MS2	69.3546	25	39.2289	23911	MS201900102_Con1.raw	F1		8	42	35	26.4857	0.001254	0.0559	16852690	39.49
	FALSE	High	[K].TLSYLLPAIVHINHQPFLER.[G]			8.30278e-05	0	1	1	1	Q61656	Q61656 [145-164]	0	2361.31	0		No Quan Values	High	High	0	5.819e-05	33		K.TLSYLLPAIVHINHQPFLER.G	[145-164]		Not Used
		Checked	Confidence	Identifying Node	PSM Ambiguity	Annotated Sequence	Modifications	# Protein Groups	# Proteins	Master Protein Accessions	Protein Accessions	# Missed Cleavages	Charge	DeltaScore	DeltaCn	Rank	Search Engine Rank	m/z [Da]	MH+ [Da]	Theo. MH+ [Da]	DeltaM [ppm]	Deltam/z [Da]	Activation Type	MS Order	Isolation Interference [%]	Ion Inject Time [ms]	RT [min]	First Scan	Spectrum File	File ID	Quan Info	Ions Score	Identity Strict	Identity Relaxed	Expectation Value	Percolator q-Value	Percolator PEP	Precursor Abundance	Apex RT [min]
		FALSE	High	Mascot (A5)	Unambiguous	[K].TLSYLLPAIVHINHQPFLER.[G]		1	1	Q61656	Q61656	0	3	1	0	1	1	787.78	2361.32	2361.31	7.06	0.00556	HCD (High Energy Collision Dissociation)	MS2	57.7116	25	49.3867	35421	MS201900102_Con1.raw	F1		33	34	27	0.0137391	0	5.819e-05
	FALSE	High	[R].MLDMGFEPQIR.[RK]			0.001927	0	3	5	1	Q501J6; Q62167; Q61656	Q501J6 [251-261]; Q62167 [352-362]; Q61656 [253-263]	0	1336.64	0	100	Shared	High	High	0	0.001502	66	42.84	R.MLDMGFEPQIR.K	[253-263]		Used
		Checked	Confidence	Identifying Node	PSM Ambiguity	Annotated Sequence	Modifications	# Protein Groups	# Proteins	Master Protein Accessions	Protein Accessions	# Missed Cleavages	Charge	DeltaScore	DeltaCn	Rank	Search Engine Rank	m/z [Da]	MH+ [Da]	Theo. MH+ [Da]	DeltaM [ppm]	Deltam/z [Da]	Activation Type	MS Order	Isolation Interference [%]	Ion Inject Time [ms]	RT [min]	First Scan	Spectrum File	File ID	Quan Info	Ions Score	Identity Strict	Identity Relaxed	Expectation Value	Percolator q-Value	Percolator PEP	Precursor Abundance	Apex RT [min]
		FALSE	High	Mascot (A5)	Unambiguous	[R].MLDMGFEPQIR.[RK]		3	5	Q501J6; Q62167; Q61656	Q62095; Q501J6; Q62167; Q61656; P16381	0	2	0.8636	0	1	1	668.828	1336.65	1336.64	8.06	0.00539	HCD (High Energy Collision Dissociation)	MS2	44.1262	25	42.6216	27901	MS201900102_Con1.raw	F1		66	42	35	3.96921e-05	0	0.001502	13857688	42.84
	FALSE	High	[K].NFYQEHPDLAR.[R]			0.00118188	0	1	1	1	Q61656	Q61656 [57-67]	0	1389.65	0		No Quan Values	High	High	0	0.0009058	54		K.NFYQEHPDLAR.R	[57-67]		Not Used
		Checked	Confidence	Identifying Node	PSM Ambiguity	Annotated Sequence	Modifications	# Protein Groups	# Proteins	Master Protein Accessions	Protein Accessions	# Missed Cleavages	Charge	DeltaScore	DeltaCn	Rank	Search Engine Rank	m/z [Da]	MH+ [Da]	Theo. MH+ [Da]	DeltaM [ppm]	Deltam/z [Da]	Activation Type	MS Order	Isolation Interference [%]	Ion Inject Time [ms]	RT [min]	First Scan	Spectrum File	File ID	Quan Info	Ions Score	Identity Strict	Identity Relaxed	Expectation Value	Percolator q-Value	Percolator PEP	Precursor Abundance	Apex RT [min]
		FALSE	High	Mascot (A5)	Unambiguous	[K].NFYQEHPDLAR.[R]		1	1	Q61656	Q61656	0	2	1	0	1	1	695.337	1389.67	1389.65	8.52	0.00592	HCD (High Energy Collision Dissociation)	MS2	0	13.126	19.8938	9002	MS201900102_Con1.raw	F1		54	42	35	0.000718041	0	0.0009058
	FALSE	High	[K].APILIATDVASR.[G]			0.000130513	0	2	2	2	Q501J6; Q61656	Q501J6 [390-401]; Q61656 [392-403]	0	1226.71	0	100	Shared	High	High	0	0.000329	75	31.61	K.APILIATDVASR.G	[392-403]		Used
		Checked	Confidence	Identifying Node	PSM Ambiguity	Annotated Sequence	Modifications	# Protein Groups	# Proteins	Master Protein Accessions	Protein Accessions	# Missed Cleavages	Charge	DeltaScore	DeltaCn	Rank	Search Engine Rank	m/z [Da]	MH+ [Da]	Theo. MH+ [Da]	DeltaM [ppm]	Deltam/z [Da]	Activation Type	MS Order	Isolation Interference [%]	Ion Inject Time [ms]	RT [min]	First Scan	Spectrum File	File ID	Quan Info	Ions Score	Identity Strict	Identity Relaxed	Expectation Value	Percolator q-Value	Percolator PEP	Precursor Abundance	Apex RT [min]
		FALSE	High	Mascot (A5)	Unambiguous	[K].APILIATDVASR.[G]		2	2	Q501J6; Q61656	Q501J6; Q61656	0	2	0.9844	0	1	1	613.866	1226.73	1226.71	12.09	0.00742	HCD (High Energy Collision Dissociation)	MS2	50.816	16.525	31.3811	16288	MS201900102_Con1.raw	F1		64	36	29	1.76348e-05	0	9.29e-05	84206760	31.61
		FALSE	High	Mascot (A5)	Unambiguous	[K].APILIATDVASR.[G]		2	2	Q501J6; Q61656	Q501J6; Q61656	0	2	0.96	0	1	1	613.863	1226.72	1226.71	7.12	0.00436	HCD (High Energy Collision Dissociation)	MS2	7.05656	11.195	31.8066	16649	MS201900102_Con1.raw	F1		75	36	29	1.672e-06	0	0.000329	84206760	31.61
	FALSE	High	[R].TTYLVLDEADR.[M]			0.00184766	0	1	1	2	Q61656	Q61656 [242-252]	0	1295.65	0	100		High	High	0	0.00144	36	33.04	R.TTYLVLDEADR.M	[242-252]		Used
		Checked	Confidence	Identifying Node	PSM Ambiguity	Annotated Sequence	Modifications	# Protein Groups	# Proteins	Master Protein Accessions	Protein Accessions	# Missed Cleavages	Charge	DeltaScore	DeltaCn	Rank	Search Engine Rank	m/z [Da]	MH+ [Da]	Theo. MH+ [Da]	DeltaM [ppm]	Deltam/z [Da]	Activation Type	MS Order	Isolation Interference [%]	Ion Inject Time [ms]	RT [min]	First Scan	Spectrum File	File ID	Quan Info	Ions Score	Identity Strict	Identity Relaxed	Expectation Value	Percolator q-Value	Percolator PEP	Precursor Abundance	Apex RT [min]
		FALSE	High	Mascot (A5)	Unambiguous	[R].TTYLVLDEADR.[M]		1	1	Q61656	Q61656	0	2	0.6389	0	1	1	648.335	1295.66	1295.65	11.67	0.00756	HCD (High Energy Collision Dissociation)	MS2	27.4166	25	32.8545	17527	MS201900102_Con1.raw	F1		36	40	33	0.0292339	0	0.00144	21725224	33.04
		FALSE	High	Mascot (A5)	Unambiguous	[R].TTYLVLDEADR.[M]		1	1	Q61656	Q61656	0	2	0.5	0	1	1	648.335	1295.66	1295.65	11.48	0.00744	HCD (High Energy Collision Dissociation)	MS2	37.9313	25	33.29	17854	MS201900102_Con1.raw	F1		26	40	33	0.315063	0.0004707	0.02192	21725224	33.04
	FALSE	High	[K].WNLDELPKFEK.[N]			0.00997896	0.000581891	1	1	2	Q61656	Q61656 [46-56]	1	1418.73	0	100		High	High	0.001254	0.0516	24	41.94	K.WNLDELPKFEK.N	[46-56]		Used
		Checked	Confidence	Identifying Node	PSM Ambiguity	Annotated Sequence	Modifications	# Protein Groups	# Proteins	Master Protein Accessions	Protein Accessions	# Missed Cleavages	Charge	DeltaScore	DeltaCn	Rank	Search Engine Rank	m/z [Da]	MH+ [Da]	Theo. MH+ [Da]	DeltaM [ppm]	Deltam/z [Da]	Activation Type	MS Order	Isolation Interference [%]	Ion Inject Time [ms]	RT [min]	First Scan	Spectrum File	File ID	Quan Info	Ions Score	Identity Strict	Identity Relaxed	Expectation Value	Percolator q-Value	Percolator PEP	Precursor Abundance	Apex RT [min]
		FALSE	High	Mascot (A5)	Unambiguous	[K].WNLDELPKFEK.[N]		1	1	Q61656	Q61656	1	3	1	0	1	1	473.586	1418.74	1418.73	8.14	0.00385	HCD (High Energy Collision Dissociation)	MS2	89.5136	25	41.8334	26966	MS201900102_Con1.raw	F1		8	41	34	22.195	0.0004707	0.0082	1.48379e+06	41.94
		FALSE	High	Mascot (A5)	Unambiguous	[K].WNLDELPKFEK.[N]		1	1	Q61656	Q61656	1	2	1	0	1	1	709.874	1418.74	1418.73	7.01	0.00497	HCD (High Energy Collision Dissociation)	MS2	76.9224	25	41.896	27038	MS201900102_Con1.raw	F1		24	41	34	0.469635	0.001254	0.0516	1.8657e+06	41.94
	FALSE	High	[K].WNLDELPK.[F]			0.0409637	0.000581891	1	1	2	Q61656	Q61656 [46-53]	0	1014.53	0	100		High	High	0.003883	0.1242	40	38.24	K.WNLDELPK.F	[46-53]		Used
		Checked	Confidence	Identifying Node	PSM Ambiguity	Annotated Sequence	Modifications	# Protein Groups	# Proteins	Master Protein Accessions	Protein Accessions	# Missed Cleavages	Charge	DeltaScore	DeltaCn	Rank	Search Engine Rank	m/z [Da]	MH+ [Da]	Theo. MH+ [Da]	DeltaM [ppm]	Deltam/z [Da]	Activation Type	MS Order	Isolation Interference [%]	Ion Inject Time [ms]	RT [min]	First Scan	Spectrum File	File ID	Quan Info	Ions Score	Identity Strict	Identity Relaxed	Expectation Value	Percolator q-Value	Percolator PEP	Precursor Abundance	Apex RT [min]
		FALSE	High	Mascot (A5)	Unambiguous	[K].WNLDELPK.[F]		1	1	Q61656	Q61656	0	2	0.9429	0	1	1	507.77	1014.53	1014.53	8.03	0.00407	HCD (High Energy Collision Dissociation)	MS2	71.8951	25	37.9976	22502	MS201900102_Con1.raw	F1		35	39	32	0.0267291	0.0004707	0.03535	8361974	38.24
		FALSE	High	Mascot (A5)	Unambiguous	[K].WNLDELPK.[F]		1	1	Q61656	Q61656	0	2	0.65	0	1	1	507.771	1014.53	1014.53	8.15	0.00413	HCD (High Energy Collision Dissociation)	MS2	0	25	38.4437	23028	MS201900102_Con1.raw	F1		40	39	32	0.00790307	0.003883	0.1242	8361974	38.24
	FALSE	High	[R].MLDMGFEPQIR.[RK]	1xOxidation [M]		0.00379548	0.000581891	3	5	3	Q501J6; Q62167; Q61656	Q501J6 [251-261]; Q62167 [352-362]; Q61656 [253-263]	0	1352.63	0	100	Shared	High	High	0.0004707	0.004584	66	34.03	R.MLDMGFEPQIR.K	[253-263]		Used
		Checked	Confidence	Identifying Node	PSM Ambiguity	Annotated Sequence	Modifications	# Protein Groups	# Proteins	Master Protein Accessions	Protein Accessions	# Missed Cleavages	Charge	DeltaScore	DeltaCn	Rank	Search Engine Rank	m/z [Da]	MH+ [Da]	Theo. MH+ [Da]	DeltaM [ppm]	Deltam/z [Da]	Activation Type	MS Order	Isolation Interference [%]	Ion Inject Time [ms]	RT [min]	First Scan	Spectrum File	File ID	Quan Info	Ions Score	Identity Strict	Identity Relaxed	Expectation Value	Percolator q-Value	Percolator PEP	Precursor Abundance	Apex RT [min]
		FALSE	High	Mascot (A5)	Unambiguous	[R].mLDMGFEPQIR.[RK]	M1(Oxidation)	3	5	Q501J6; Q62167; Q61656	Q62095; Q501J6; Q62167; Q61656; P16381	0	2	0.9091	0	1	1	676.826	1352.65	1352.63	8.75	0.00592	HCD (High Energy Collision Dissociation)	MS2	49.5547	21.76	38.9451	23575	MS201900102_Con1.raw	F1		22	42	35	0.999374	0.0004707	0.01871
		FALSE	High	Mascot (A5)	Unambiguous	[R].MLDmGFEPQIR.[RK]	M4(Oxidation)	3	5	Q501J6; Q62167; Q61656	Q62095; Q501J6; Q62167; Q61656; P16381	0	2	0.8036	0	1	1	676.824	1352.64	1352.63	5.14	0.00348	HCD (High Energy Collision Dissociation)	MS2	24.3123	17.861	33.8976	18347	MS201900102_Con1.raw	F1		56	42	35	0.000435731	0.0004707	0.003027	9258546	34.03
		FALSE	High	Mascot (A5)	Unambiguous	[R].mLDMGFEPQIR.[RK]	M1(Oxidation)	3	5	Q501J6; Q62167; Q61656	Q62095; Q501J6; Q62167; Q61656; P16381	0	2	0.7879	0	1	1	676.826	1352.64	1352.63	8.03	0.00543	HCD (High Energy Collision Dissociation)	MS2	20.3918	25	38.03	22539	MS201900102_Con1.raw	F1		66	42	35	4.01974e-05	0.0004707	0.004584	7576449	38.16
	FALSE	High	[R].QTLMWSATWPK.[E]			0.00612224	0.000581891	2	2	2	Q501J6; Q61656	Q501J6 [272-282]; Q61656 [274-284]	0	1348.67	0	100	Shared	High	High	0.0004707	0.004959	33	44.86	R.QTLMWSATWPK.E	[274-284]		Used
		Checked	Confidence	Identifying Node	PSM Ambiguity	Annotated Sequence	Modifications	# Protein Groups	# Proteins	Master Protein Accessions	Protein Accessions	# Missed Cleavages	Charge	DeltaScore	DeltaCn	Rank	Search Engine Rank	m/z [Da]	MH+ [Da]	Theo. MH+ [Da]	DeltaM [ppm]	Deltam/z [Da]	Activation Type	MS Order	Isolation Interference [%]	Ion Inject Time [ms]	RT [min]	First Scan	Spectrum File	File ID	Quan Info	Ions Score	Identity Strict	Identity Relaxed	Expectation Value	Percolator q-Value	Percolator PEP	Precursor Abundance	Apex RT [min]
		FALSE	High	Mascot (A5)	Unambiguous	[R].QTLMWSATWPK.[E]		2	2	Q501J6; Q61656	Q501J6; Q61656	0	2	1	0	1	1	674.845	1348.68	1348.67	8.4	0.00567	HCD (High Energy Collision Dissociation)	MS2	0	25	44.6577	30167	MS201900102_Con1.raw	F1		33	41	34	0.0710057	0.0004707	0.004959	11639340	44.86
		FALSE	High	Mascot (A5)	Unambiguous	[R].QTLMWSATWPK.[E]		2	2	Q501J6; Q61656	Q501J6; Q61656	0	2	0.8235	0	1	1	674.83	1348.65	1348.67	-14.59	-0.00984	HCD (High Energy Collision Dissociation)	MS2	27.1331	25	57.6873	40343	MS201900102_Con1.raw	F1	Not Reliable	17	42	35	3.26477	0.003883	0.1208
	FALSE	High	[R].QTLMWSATWPK.[E]	1xOxidation [M4]		0.0124412	0.000581891	2	2	1	Q501J6; Q61656	Q501J6 [272-282]; Q61656 [274-284]	0	1364.67	0		No Quan Values	High	High	0.0004707	0.01031	8		R.QTLMWSATWPK.E	[274-284]		Not Used
		Checked	Confidence	Identifying Node	PSM Ambiguity	Annotated Sequence	Modifications	# Protein Groups	# Proteins	Master Protein Accessions	Protein Accessions	# Missed Cleavages	Charge	DeltaScore	DeltaCn	Rank	Search Engine Rank	m/z [Da]	MH+ [Da]	Theo. MH+ [Da]	DeltaM [ppm]	Deltam/z [Da]	Activation Type	MS Order	Isolation Interference [%]	Ion Inject Time [ms]	RT [min]	First Scan	Spectrum File	File ID	Quan Info	Ions Score	Identity Strict	Identity Relaxed	Expectation Value	Percolator q-Value	Percolator PEP	Precursor Abundance	Apex RT [min]
		FALSE	High	Mascot (A5)	Unambiguous	[R].QTLmWSATWPK.[E]	M4(Oxidation)	2	2	Q501J6; Q61656	Q501J6; Q61656	0	2	1	0	1	1	682.843	1364.68	1364.67	8.54	0.00583	HCD (High Energy Collision Dissociation)	MS2	95.9312	16.876	39.7794	24566	MS201900102_Con1.raw	F1		8	41	34	25.5252	0.0004707	0.01031
	FALSE	High	[R].ELAQQVQQVAAEYCR.[A]			0.0320864	0.000581891	1	1	1	Q61656	Q61656 [178-192]	0	1735.84	0		No Quan Values	High	High	0.0004707	0.02744	15		R.ELAQQVQQVAAEYCR.A	[178-192]		Not Used
		Checked	Confidence	Identifying Node	PSM Ambiguity	Annotated Sequence	Modifications	# Protein Groups	# Proteins	Master Protein Accessions	Protein Accessions	# Missed Cleavages	Charge	DeltaScore	DeltaCn	Rank	Search Engine Rank	m/z [Da]	MH+ [Da]	Theo. MH+ [Da]	DeltaM [ppm]	Deltam/z [Da]	Activation Type	MS Order	Isolation Interference [%]	Ion Inject Time [ms]	RT [min]	First Scan	Spectrum File	File ID	Quan Info	Ions Score	Identity Strict	Identity Relaxed	Expectation Value	Percolator q-Value	Percolator PEP	Precursor Abundance	Apex RT [min]
		FALSE	High	Mascot (A5)	Unambiguous	[R].ELAQQVQQVAAEYCR.[A]		1	1	Q61656	Q61656	0	2	1	0	1	1	868.44	1735.87	1735.84	16.73	0.01452	HCD (High Energy Collision Dissociation)	MS2	0	25	49.1575	35172	MS201900102_Con1.raw	F1		15	42	35	5.97328	0.0004707	0.02744
	FALSE	High	[K].LLQLVEDR.[G]			0.0251081	0.000581891	1	1	2	Q61656	Q61656 [471-478]	0	985.568	0	100		High	High	0.0004707	0.02509	62	28.25	K.LLQLVEDR.G	[471-478]		Used
		Checked	Confidence	Identifying Node	PSM Ambiguity	Annotated Sequence	Modifications	# Protein Groups	# Proteins	Master Protein Accessions	Protein Accessions	# Missed Cleavages	Charge	DeltaScore	DeltaCn	Rank	Search Engine Rank	m/z [Da]	MH+ [Da]	Theo. MH+ [Da]	DeltaM [ppm]	Deltam/z [Da]	Activation Type	MS Order	Isolation Interference [%]	Ion Inject Time [ms]	RT [min]	First Scan	Spectrum File	File ID	Quan Info	Ions Score	Identity Strict	Identity Relaxed	Expectation Value	Percolator q-Value	Percolator PEP	Precursor Abundance	Apex RT [min]
		FALSE	High	Mascot (A5)	Unambiguous	[K].LLQLVEDR.[G]		1	1	Q61656	Q61656	0	2	0.6613	0	1	1	493.291	985.575	985.568	7.68	0.00379	HCD (High Energy Collision Dissociation)	MS2	0	25	27.9548	13452	MS201900102_Con1.raw	F1		62	39	32	5.7381e-05	0.0004707	0.0213	33904656	28.25
		FALSE	High	Mascot (A5)	Unambiguous	[K].LLQLVEDR.[G]		1	1	Q61656	Q61656	0	2	0.6613	0	1	1	493.291	985.576	985.568	7.99	0.00394	HCD (High Energy Collision Dissociation)	MS2	0	11.406	28.3758	13739	MS201900102_Con1.raw	F1		62	39	32	5.20916e-05	0.0004707	0.02509	33904656	28.25
	FALSE	High	[R].LMEEIMSEK.[E]			0.0142601	0.000581891	1	1	1	Q61656	Q61656 [332-340]	0	1109.52	0		No Quan Values	High	High	0.0004707	0.01185	52		R.LMEEIMSEK.E	[332-340]		Not Used
		Checked	Confidence	Identifying Node	PSM Ambiguity	Annotated Sequence	Modifications	# Protein Groups	# Proteins	Master Protein Accessions	Protein Accessions	# Missed Cleavages	Charge	DeltaScore	DeltaCn	Rank	Search Engine Rank	m/z [Da]	MH+ [Da]	Theo. MH+ [Da]	DeltaM [ppm]	Deltam/z [Da]	Activation Type	MS Order	Isolation Interference [%]	Ion Inject Time [ms]	RT [min]	First Scan	Spectrum File	File ID	Quan Info	Ions Score	Identity Strict	Identity Relaxed	Expectation Value	Percolator q-Value	Percolator PEP	Precursor Abundance	Apex RT [min]
		FALSE	High	Mascot (A5)	Unambiguous	[R].LMEEIMSEK.[E]		1	1	Q61656	Q61656	0	2	1	0	1	1	555.267	1109.53	1109.52	5.12	0.00284	HCD (High Energy Collision Dissociation)	MS2	0	18.9	27.6144	13235	MS201900102_Con1.raw	F1		52	41	34	0.000761532	0.0004707	0.01185
	FALSE	High	[R].LMEEIMSEK.[E]	1xOxidation [M2]		0.0461423	0.00154131	1	1	1	Q61656	Q61656 [332-340]	0	1125.52	0	100		High	High	0.001254	0.03997	34	18.7	R.LMEEIMSEK.E	[332-340]		Used
		Checked	Confidence	Identifying Node	PSM Ambiguity	Annotated Sequence	Modifications	# Protein Groups	# Proteins	Master Protein Accessions	Protein Accessions	# Missed Cleavages	Charge	DeltaScore	DeltaCn	Rank	Search Engine Rank	m/z [Da]	MH+ [Da]	Theo. MH+ [Da]	DeltaM [ppm]	Deltam/z [Da]	Activation Type	MS Order	Isolation Interference [%]	Ion Inject Time [ms]	RT [min]	First Scan	Spectrum File	File ID	Quan Info	Ions Score	Identity Strict	Identity Relaxed	Expectation Value	Percolator q-Value	Percolator PEP	Precursor Abundance	Apex RT [min]
		FALSE	High	Mascot (A5)	Unambiguous	[R].LmEEIMSEK.[E]	M2(Oxidation)	1	1	Q61656	Q61656	0	2	0.9412	0	1	1	563.267	1125.53	1125.52	9.46	0.00532	HCD (High Energy Collision Dissociation)	MS2	26.2654	25	18.5155	7795	MS201900102_Con1.raw	F1		34	41	34	0.0605707	0.001254	0.03997	4855038	18.7
	FALSE	High	[R].LMEEIMSEKENK.[T]	1xOxidation [M6]		0.0702799	0.00154131	1	1	1	Q61656	Q61656 [332-343]	1	1496.7	0	100		High	High	0.001254	0.0617	20	15.83	R.LMEEIMSEKENK.T	[332-343]		Used
		Checked	Confidence	Identifying Node	PSM Ambiguity	Annotated Sequence	Modifications	# Protein Groups	# Proteins	Master Protein Accessions	Protein Accessions	# Missed Cleavages	Charge	DeltaScore	DeltaCn	Rank	Search Engine Rank	m/z [Da]	MH+ [Da]	Theo. MH+ [Da]	DeltaM [ppm]	Deltam/z [Da]	Activation Type	MS Order	Isolation Interference [%]	Ion Inject Time [ms]	RT [min]	First Scan	Spectrum File	File ID	Quan Info	Ions Score	Identity Strict	Identity Relaxed	Expectation Value	Percolator q-Value	Percolator PEP	Precursor Abundance	Apex RT [min]
		FALSE	High	Mascot (A5)	Unambiguous	[R].LMEEImSEKENK.[T]	M6(Oxidation)	1	1	Q61656	Q61656	1	2	1	0	1	1	748.859	1496.71	1496.7	8.46	0.00633	HCD (High Energy Collision Dissociation)	MS2	26.3342	25	16.114	5898	MS201900102_Con1.raw	F1		20	42	36	1.7808	0.001254	0.0617	4597513	15.83
	FALSE	High	[R].DGWPAMGIHGDK.[S]	1xOxidation [M6]		0.072826	0.00154131	1	1	1	Q61656	Q61656 [364-375]	0	1299.58	0		No Quan Values	High	High	0.001254	0.0639	10		R.DGWPAMGIHGDK.S	[364-375]		Not Used
		Checked	Confidence	Identifying Node	PSM Ambiguity	Annotated Sequence	Modifications	# Protein Groups	# Proteins	Master Protein Accessions	Protein Accessions	# Missed Cleavages	Charge	DeltaScore	DeltaCn	Rank	Search Engine Rank	m/z [Da]	MH+ [Da]	Theo. MH+ [Da]	DeltaM [ppm]	Deltam/z [Da]	Activation Type	MS Order	Isolation Interference [%]	Ion Inject Time [ms]	RT [min]	First Scan	Spectrum File	File ID	Quan Info	Ions Score	Identity Strict	Identity Relaxed	Expectation Value	Percolator q-Value	Percolator PEP	Precursor Abundance	Apex RT [min]
		FALSE	High	Mascot (A5)	Unambiguous	[R].DGWPAmGIHGDK.[S]	M6(Oxidation)	1	1	Q61656	Q61656	0	2	0.9	0	1	1	650.3	1299.59	1299.58	10.25	0.00666	HCD (High Energy Collision Dissociation)	MS2	15.6254	25	18.803	8134	MS201900102_Con1.raw	F1		10	41	34	13.2542	0.001254	0.0639
	FALSE	High	[R].MLDMGFEPQIR.[RK]	2xOxidation [M1; M4]		0.108804	0.0029762	3	5	1	Q501J6; Q62167; Q61656	Q501J6 [251-261]; Q62167 [352-362]; Q61656 [253-263]	0	1368.63	0	100	Shared	High	High	0.002413	0.09706	23	30.09	R.MLDMGFEPQIR.K	[253-263]		Used
		Checked	Confidence	Identifying Node	PSM Ambiguity	Annotated Sequence	Modifications	# Protein Groups	# Proteins	Master Protein Accessions	Protein Accessions	# Missed Cleavages	Charge	DeltaScore	DeltaCn	Rank	Search Engine Rank	m/z [Da]	MH+ [Da]	Theo. MH+ [Da]	DeltaM [ppm]	Deltam/z [Da]	Activation Type	MS Order	Isolation Interference [%]	Ion Inject Time [ms]	RT [min]	First Scan	Spectrum File	File ID	Quan Info	Ions Score	Identity Strict	Identity Relaxed	Expectation Value	Percolator q-Value	Percolator PEP	Precursor Abundance	Apex RT [min]
		FALSE	High	Mascot (A5)	Unambiguous	[R].mLDmGFEPQIR.[RK]	M1(Oxidation); M4(Oxidation)	3	5	Q501J6; Q62167; Q61656	Q62095; Q501J6; Q62167; Q61656; P16381	0	2	1	0	1	1	684.825	1368.64	1368.63	10.58	0.00724	HCD (High Energy Collision Dissociation)	MS2	0	12.125	29.9486	15050	MS201900102_Con1.raw	F1		23	42	35	1.01904	0.002413	0.09706	6624101	30.09
	FALSE	High	[R].RDGWPAMGIHGDK.[S]			0.107732	0.0029762	1	1	1	Q61656	Q61656 [363-375]	1	1439.68	0	100		High	High	0.002413	0.09566	5	19.21	R.RDGWPAMGIHGDK.S	[363-375]		Used
		Checked	Confidence	Identifying Node	PSM Ambiguity	Annotated Sequence	Modifications	# Protein Groups	# Proteins	Master Protein Accessions	Protein Accessions	# Missed Cleavages	Charge	DeltaScore	DeltaCn	Rank	Search Engine Rank	m/z [Da]	MH+ [Da]	Theo. MH+ [Da]	DeltaM [ppm]	Deltam/z [Da]	Activation Type	MS Order	Isolation Interference [%]	Ion Inject Time [ms]	RT [min]	First Scan	Spectrum File	File ID	Quan Info	Ions Score	Identity Strict	Identity Relaxed	Expectation Value	Percolator q-Value	Percolator PEP	Precursor Abundance	Apex RT [min]
		FALSE	High	Mascot (A5)	Unambiguous	[R].RDGWPAMGIHGDK.[S]		1	1	Q61656	Q61656	1	3	1	0	1	1	480.57	1439.7	1439.68	8.08	0.00388	HCD (High Energy Collision Dissociation)	MS2	67.254	25	19.2576	8654	MS201900102_Con1.raw	F1		5	42	35	60.1722	0.002413	0.09566	1.73654e+06	19.21
	FALSE	High	[R].QLAEDFLK.[D]			0.156643	0.00519599	1	1	1	Q61656	Q61656 [288-295]	0	963.515	0	100		High	High	0.004207	0.1413	23	31.07	R.QLAEDFLK.D	[288-295]		Used
		Checked	Confidence	Identifying Node	PSM Ambiguity	Annotated Sequence	Modifications	# Protein Groups	# Proteins	Master Protein Accessions	Protein Accessions	# Missed Cleavages	Charge	DeltaScore	DeltaCn	Rank	Search Engine Rank	m/z [Da]	MH+ [Da]	Theo. MH+ [Da]	DeltaM [ppm]	Deltam/z [Da]	Activation Type	MS Order	Isolation Interference [%]	Ion Inject Time [ms]	RT [min]	First Scan	Spectrum File	File ID	Quan Info	Ions Score	Identity Strict	Identity Relaxed	Expectation Value	Percolator q-Value	Percolator PEP	Precursor Abundance	Apex RT [min]
		FALSE	High	Mascot (A5)	Unambiguous	[R].QLAEDFLK.[D]		1	1	Q61656	Q61656	0	2	1	0	1	1	482.266	963.524	963.515	9.63	0.00464	HCD (High Energy Collision Dissociation)	MS2	29.2989	16.034	30.9596	15927	MS201900102_Con1.raw	F1		23	38	31	0.318086	0.004207	0.1413	4886645	31.07
	FALSE	High	[K].IVDQIRPDR.[Q]			0.18727	0.00605088	2	2	1	Q501J6; Q61656	Q501J6 [263-271]; Q61656 [265-273]	0	1111.62	0	100	Shared	High	High	0.004901	0.1697	16	15.43	K.IVDQIRPDR.Q	[265-273]		Used
		Checked	Confidence	Identifying Node	PSM Ambiguity	Annotated Sequence	Modifications	# Protein Groups	# Proteins	Master Protein Accessions	Protein Accessions	# Missed Cleavages	Charge	DeltaScore	DeltaCn	Rank	Search Engine Rank	m/z [Da]	MH+ [Da]	Theo. MH+ [Da]	DeltaM [ppm]	Deltam/z [Da]	Activation Type	MS Order	Isolation Interference [%]	Ion Inject Time [ms]	RT [min]	First Scan	Spectrum File	File ID	Quan Info	Ions Score	Identity Strict	Identity Relaxed	Expectation Value	Percolator q-Value	Percolator PEP	Precursor Abundance	Apex RT [min]
		FALSE	High	Mascot (A5)	Unambiguous	[K].IVDQIRPDR.[Q]		2	2	Q501J6; Q61656	Q501J6; Q61656	0	2	0.4375	0	1	1	556.32	1111.63	1111.62	10.47	0.00582	HCD (High Energy Collision Dissociation)	MS2	14.4023	25	15.3788	5030	MS201900102_Con1.raw	F1		16	36	29	1.1914	0.004901	0.1697	24080016	15.43
	FALSE	High	[K].TIVFVETK.[R]			0.177092	0.00605088	1	1	1	Q61656	Q61656 [344-351]	0	936.54	0	100		High	High	0.004901	0.1603	40	24.09	K.TIVFVETK.R	[344-351]		Used
		Checked	Confidence	Identifying Node	PSM Ambiguity	Annotated Sequence	Modifications	# Protein Groups	# Proteins	Master Protein Accessions	Protein Accessions	# Missed Cleavages	Charge	DeltaScore	DeltaCn	Rank	Search Engine Rank	m/z [Da]	MH+ [Da]	Theo. MH+ [Da]	DeltaM [ppm]	Deltam/z [Da]	Activation Type	MS Order	Isolation Interference [%]	Ion Inject Time [ms]	RT [min]	First Scan	Spectrum File	File ID	Quan Info	Ions Score	Identity Strict	Identity Relaxed	Expectation Value	Percolator q-Value	Percolator PEP	Precursor Abundance	Apex RT [min]
		FALSE	High	Mascot (A5)	Unambiguous	[K].TIVFVETK.[R]		1	1	Q61656	Q61656	0	2	0.825	0	1	1	468.777	936.547	936.54	7.39	0.00346	HCD (High Energy Collision Dissociation)	MS2	0	25	23.9742	10985	MS201900102_Con1.raw	F1		40	34	27	0.00241067	0.004901	0.1603	20581034	24.09
FALSE	High	Master Protein	P70333	Heterogeneous nuclear ribonucleoprotein H2 OS=Mus musculus OX=10090 GN=Hnrnph2 PE=1 SV=1	0	58.943	35	11	41	6	1	449	49.2	6.3	866	11		cytosol;membrane;nucleus	RNA binding	Pf00076, Pf08080, Pf14259	56258	ENSMUSG00000045427.13	Hnrnph2	X	mRNA processing		5	100	High	Phospho [S104; Y266]
	Checked	Confidence	Annotated Sequence	Modifications	Modifications in Master Proteins	Qvality PEP	Qvality q-value	# Protein Groups	# Proteins	# PSMs	Master Protein Accessions	Positions in Master Proteins	# Missed Cleavages	Theo. MH+ [Da]	# Razor Quan Results	Abundances (Scaled): F1: Sample	Quan Info	Found in Sample: [S1] F1: Sample	Confidence (by Search Engine): Mascot	Percolator q-Value (by Search Engine): Mascot	Percolator PEP (by Search Engine): Mascot	Ions Score (by Search Engine): Mascot	Top Apex RT [min]	Sequence in Protein	Positions in Protein	Peptide Group Modifications in Protein	Quan Usage
	FALSE	High	[K].HTGPNSPDTANDGFVR.[L]			1.214e-08	0	2	2	2	P70333; O35737	P70333 [99-114]; O35737 [99-114]	0	1684.77	0		No Quan Values	High	High	0	6.304e-09	115		K.HTGPNSPDTANDGFVR.L	[99-114]		Not Used
		Checked	Confidence	Identifying Node	PSM Ambiguity	Annotated Sequence	Modifications	# Protein Groups	# Proteins	Master Protein Accessions	Protein Accessions	# Missed Cleavages	Charge	DeltaScore	DeltaCn	Rank	Search Engine Rank	m/z [Da]	MH+ [Da]	Theo. MH+ [Da]	DeltaM [ppm]	Deltam/z [Da]	Activation Type	MS Order	Isolation Interference [%]	Ion Inject Time [ms]	RT [min]	First Scan	Spectrum File	File ID	Quan Info	Ions Score	Identity Strict	Identity Relaxed	Expectation Value	Percolator q-Value	Percolator PEP	Precursor Abundance	Apex RT [min]
		FALSE	High	Mascot (A5)	Unambiguous	[K].HTGPNSPDTANDGFVR.[L]		2	2	P70333; O35737	P70333; O35737	0	2	0.9826	0	1	1	842.895	1684.78	1684.77	9.63	0.00812	HCD (High Energy Collision Dissociation)	MS2	0	12.965	16.6333	6097	MS201900102_Con1.raw	F1		115	43	36	6.78922e-10	0	6.304e-09	30384434	16.71
		FALSE	High	Mascot (A5)	Unambiguous	[K].HTGPNSPDTANDGFVR.[L]		2	2	P70333; O35737	P70333; O35737	0	3	0.9333	0	1	1	562.266	1684.78	1684.77	9.52	0.00534	HCD (High Energy Collision Dissociation)	MS2	55.3992	16.857	17.5516	6717	MS201900102_Con1.raw	F1		30	43	36	0.217831	0.0004707	0.004049
	FALSE	High	[R].RGAYGGGYGGYDDYGGYNDGYGFGSDR.[F]			2.64935e-06	0	1	1	1	P70333	P70333 [233-259]	1	2816.12	0		No Quan Values	High	High	0	1.649e-06	74		R.RGAYGGGYGGYDDYGGYNDGYGFGSDR.F	[233-259]		Not Used
		Checked	Confidence	Identifying Node	PSM Ambiguity	Annotated Sequence	Modifications	# Protein Groups	# Proteins	Master Protein Accessions	Protein Accessions	# Missed Cleavages	Charge	DeltaScore	DeltaCn	Rank	Search Engine Rank	m/z [Da]	MH+ [Da]	Theo. MH+ [Da]	DeltaM [ppm]	Deltam/z [Da]	Activation Type	MS Order	Isolation Interference [%]	Ion Inject Time [ms]	RT [min]	First Scan	Spectrum File	File ID	Quan Info	Ions Score	Identity Strict	Identity Relaxed	Expectation Value	Percolator q-Value	Percolator PEP	Precursor Abundance	Apex RT [min]
		FALSE	High	Mascot (A5)	Unambiguous	[R].RGAYGGGYGGYDDYGGYNDGYGFGSDR.[F]		1	1	P70333	P70333	1	3	0.973	0	1	1	939.387	2816.15	2816.12	7.47	0.00701	HCD (High Energy Collision Dissociation)	MS2	60.7002	25	37.5658	21979	MS201900102_Con1.raw	F1		74	46	39	1.75687e-05	0	1.649e-06
	FALSE	High	[R].GAYGGGYGGYDDYGGYNDGYGFGSDR.[F]			2.86106e-08	0	1	1	1	P70333	P70333 [234-259]	0	2660.02	0		No Quan Values	High	High	0	1.533e-08	126		R.GAYGGGYGGYDDYGGYNDGYGFGSDR.F	[234-259]		Not Used
		Checked	Confidence	Identifying Node	PSM Ambiguity	Annotated Sequence	Modifications	# Protein Groups	# Proteins	Master Protein Accessions	Protein Accessions	# Missed Cleavages	Charge	DeltaScore	DeltaCn	Rank	Search Engine Rank	m/z [Da]	MH+ [Da]	Theo. MH+ [Da]	DeltaM [ppm]	Deltam/z [Da]	Activation Type	MS Order	Isolation Interference [%]	Ion Inject Time [ms]	RT [min]	First Scan	Spectrum File	File ID	Quan Info	Ions Score	Identity Strict	Identity Relaxed	Expectation Value	Percolator q-Value	Percolator PEP	Precursor Abundance	Apex RT [min]
		FALSE	High	Mascot (A5)	Unambiguous	[R].GAYGGGYGGYDDYGGYNDGYGFGSDR.[F]		1	1	P70333	P70333	0	2	1	0	1	1	1330.52	2660.04	2660.02	6.23	0.00828	HCD (High Energy Collision Dissociation)	MS2	0	25	44.4411	29938	MS201900102_Con1.raw	F1		126	45	38	1.00771e-10	0	1.533e-08	2.03272e+06	44.5
	FALSE	High	[R].STGEAFVQFASQEIAEK.[A]			0.000220829	0	2	2	2	P70333; O35737	P70333 [151-167]; O35737 [151-167]	0	1841.89	0	100	Shared	High	High	0	0.0001595	55	49.37	R.STGEAFVQFASQEIAEK.A	[151-167]		Used
		Checked	Confidence	Identifying Node	PSM Ambiguity	Annotated Sequence	Modifications	# Protein Groups	# Proteins	Master Protein Accessions	Protein Accessions	# Missed Cleavages	Charge	DeltaScore	DeltaCn	Rank	Search Engine Rank	m/z [Da]	MH+ [Da]	Theo. MH+ [Da]	DeltaM [ppm]	Deltam/z [Da]	Activation Type	MS Order	Isolation Interference [%]	Ion Inject Time [ms]	RT [min]	First Scan	Spectrum File	File ID	Quan Info	Ions Score	Identity Strict	Identity Relaxed	Expectation Value	Percolator q-Value	Percolator PEP	Precursor Abundance	Apex RT [min]
		FALSE	High	Mascot (A5)	Unambiguous	[R].STGEAFVQFASQEIAEK.[A]		2	2	P70333; O35737	P70333; O35737	0	2	1	0	1	1	921.455	1841.9	1841.89	6.33	0.00583	HCD (High Energy Collision Dissociation)	MS2	0	17.095	49.2077	35232	MS201900102_Con1.raw	F1		52	43	36	0.00151729	0	0.0002481	419548672	49.37
		FALSE	High	Mascot (A5)	Unambiguous	[R].STGEAFVQFASQEIAEK.[A]		2	2	P70333; O35737	P70333; O35737	0	2	1	0	1	1	921.458	1841.91	1841.89	9.58	0.00882	HCD (High Energy Collision Dissociation)	MS2	0	9.43	49.479	35512	MS201900102_Con1.raw	F1		55	43	36	0.000695216	0	0.0001595	419548672	49.37
	FALSE	High	[R].ATENDIYNFFSPLNPMR.[V]			0.00049115	0	1	1	1	P70333	P70333 [300-316]	0	2028.95	0	100		High	High	0	0.0003654	57	67.48	R.ATENDIYNFFSPLNPMR.V	[300-316]		Used
		Checked	Confidence	Identifying Node	PSM Ambiguity	Annotated Sequence	Modifications	# Protein Groups	# Proteins	Master Protein Accessions	Protein Accessions	# Missed Cleavages	Charge	DeltaScore	DeltaCn	Rank	Search Engine Rank	m/z [Da]	MH+ [Da]	Theo. MH+ [Da]	DeltaM [ppm]	Deltam/z [Da]	Activation Type	MS Order	Isolation Interference [%]	Ion Inject Time [ms]	RT [min]	First Scan	Spectrum File	File ID	Quan Info	Ions Score	Identity Strict	Identity Relaxed	Expectation Value	Percolator q-Value	Percolator PEP	Precursor Abundance	Apex RT [min]
		FALSE	High	Mascot (A5)	Unambiguous	[R].ATENDIYNFFSPLNPMR.[V]		1	1	P70333	P70333	0	2	1	0	1	1	1014.99	2028.97	2028.95	8.5	0.00862	HCD (High Energy Collision Dissociation)	MS2	75.2729	25	67.2915	49966	MS201900102_Con1.raw	F1		57	44	37	0.000566896	0	0.0003654	7.3793e+06	67.48
	FALSE	High	[R].ATENDIYNFFSPLNPMR.[V]	1xOxidation [M16]		0.000649014	0	1	1	2	P70333	P70333 [300-316]	0	2044.94	0	100		High	High	0	0.0004858	60	61.42	R.ATENDIYNFFSPLNPMR.V	[300-316]		Used
		Checked	Confidence	Identifying Node	PSM Ambiguity	Annotated Sequence	Modifications	# Protein Groups	# Proteins	Master Protein Accessions	Protein Accessions	# Missed Cleavages	Charge	DeltaScore	DeltaCn	Rank	Search Engine Rank	m/z [Da]	MH+ [Da]	Theo. MH+ [Da]	DeltaM [ppm]	Deltam/z [Da]	Activation Type	MS Order	Isolation Interference [%]	Ion Inject Time [ms]	RT [min]	First Scan	Spectrum File	File ID	Quan Info	Ions Score	Identity Strict	Identity Relaxed	Expectation Value	Percolator q-Value	Percolator PEP	Precursor Abundance	Apex RT [min]
		FALSE	High	Mascot (A5)	Unambiguous	[R].ATENDIYNFFSPLNPmR.[V]	M16(Oxidation)	1	1	P70333	P70333	0	2	1	0	1	1	1022.98	2044.96	2044.94	9.42	0.00963	HCD (High Energy Collision Dissociation)	MS2	0	25	61.3338	43869	MS201900102_Con1.raw	F1		60	45	38	0.000285652	0	0.0004858	3.29044e+06	61.42
		FALSE	High	Mascot (A5)	Unambiguous	[R].ATENDIYNFFSPLNPmR.[V]	M16(Oxidation)	1	1	P70333	P70333	0	2	0.9744	0	1	1	1022.99	2044.97	2044.94	10.62	0.01086	HCD (High Energy Collision Dissociation)	MS2	0	25	61.7959	44368	MS201900102_Con1.raw	F1		39	45	38	0.0409364	0.0004707	0.01233	3.29044e+06	61.42
	FALSE	High	[R].VTGEADVEFATHEDAVAAMAK.[D]			6.92937e-07	0	1	1	7	P70333	P70333 [327-347]	0	2162.01	0	100		High	High	0	3.961e-05	54	39.01	R.VTGEADVEFATHEDAVAAMAK.D	[327-347]		Used
		Checked	Confidence	Identifying Node	PSM Ambiguity	Annotated Sequence	Modifications	# Protein Groups	# Proteins	Master Protein Accessions	Protein Accessions	# Missed Cleavages	Charge	DeltaScore	DeltaCn	Rank	Search Engine Rank	m/z [Da]	MH+ [Da]	Theo. MH+ [Da]	DeltaM [ppm]	Deltam/z [Da]	Activation Type	MS Order	Isolation Interference [%]	Ion Inject Time [ms]	RT [min]	First Scan	Spectrum File	File ID	Quan Info	Ions Score	Identity Strict	Identity Relaxed	Expectation Value	Percolator q-Value	Percolator PEP	Precursor Abundance	Apex RT [min]
		FALSE	High	Mascot (A5)	Unambiguous	[R].VTGEADVEFATHEDAVAAMAK.[D]		1	1	P70333	P70333	0	3	1	0	1	1	721.346	2162.02	2162.01	7.52	0.00542	HCD (High Energy Collision Dissociation)	MS2	41.2761	17.221	35.8089	19991	MS201900102_Con1.raw	F1		24	45	38	1.41721	0	7.495e-05
		FALSE	High	Mascot (A5)	Unambiguous	[R].VTGEADVEFATHEDAVAAMAK.[D]		1	1	P70333	P70333	0	3	1	0	1	1	721.345	2162.02	2162.01	6.17	0.00444	HCD (High Energy Collision Dissociation)	MS2	0	25	36.3164	20533	MS201900102_Con1.raw	F1		54	45	38	0.00144263	0	3.961e-05
		FALSE	High	Mascot (A5)	Unambiguous	[R].VTGEADVEFATHEDAVAAMAK.[D]		1	1	P70333	P70333	0	3	1	0	1	1	721.343	2162.01	2162.01	3.03	0.00219	HCD (High Energy Collision Dissociation)	MS2	0	25	38.6922	23280	MS201900102_Con1.raw	F1		49	45	38	0.00469859	0	4.138e-07	903225	38.43
		FALSE	High	Mascot (A5)	Unambiguous	[R].VTGEADVEFATHEDAVAAMAK.[D]		1	1	P70333	P70333	0	3	1	0	1	1	721.345	2162.02	2162.01	6.42	0.00463	HCD (High Energy Collision Dissociation)	MS2	0	25	35.8941	20078	MS201900102_Con1.raw	F1		42	45	38	0.0210467	0	7.892e-05
		FALSE	High	Mascot (A5)	Unambiguous	[R].VTGEADVEFATHEDAVAAMAK.[D]		1	1	P70333	P70333	0	2	0.9091	0	1	1	1081.52	2162.02	2162.01	7.39	0.00799	HCD (High Energy Collision Dissociation)	MS2	0	25	38.0077	22515	MS201900102_Con1.raw	F1		33	45	38	0.171567	0.0004707	0.02576
		FALSE	High	Mascot (A5)	Unambiguous	[R].VTGEADVEFATHEDAVAAMAK.[D]		1	1	P70333	P70333	0	3	0.85	0	1	1	721.347	2162.03	2162.01	8.96	0.00646	HCD (High Energy Collision Dissociation)	MS2	0	25	37.4982	21901	MS201900102_Con1.raw	F1		20	45	38	3.5444	0.0004707	0.006133
		FALSE	High	Mascot (A5)	Unambiguous	[R].VTGEADVEFATHEDAVAAMAK.[D]		1	1	P70333	P70333	0	3	1	0	1	1	721.345	2162.02	2162.01	6.68	0.00481	HCD (High Energy Collision Dissociation)	MS2	64.6827	25	39.4183	24143	MS201900102_Con1.raw	F1		9	45	38	43.342	0.001254	0.05744	964126	39.01
	FALSE	High	[R].VHIEIGPDGR.[V]			0.00131291	0	3	3	4	P70333; O35737; Q9Z2X1	P70333 [317-326]; O35737 [317-326]; Q9Z2X1 [317-326]	0	1092.58	0	100	Shared	High	High	0	0.001011	54	18.19	R.VHIEIGPDGR.V	[317-326]		Used
		Checked	Confidence	Identifying Node	PSM Ambiguity	Annotated Sequence	Modifications	# Protein Groups	# Proteins	Master Protein Accessions	Protein Accessions	# Missed Cleavages	Charge	DeltaScore	DeltaCn	Rank	Search Engine Rank	m/z [Da]	MH+ [Da]	Theo. MH+ [Da]	DeltaM [ppm]	Deltam/z [Da]	Activation Type	MS Order	Isolation Interference [%]	Ion Inject Time [ms]	RT [min]	First Scan	Spectrum File	File ID	Quan Info	Ions Score	Identity Strict	Identity Relaxed	Expectation Value	Percolator q-Value	Percolator PEP	Precursor Abundance	Apex RT [min]
		FALSE	High	Mascot (A5)	Unambiguous	[R].VHIEIGPDGR.[V]		3	3	P70333; O35737; Q9Z2X1	P70333; O35737; Q9Z2X1	0	2	1	0	1	1	546.797	1092.59	1092.58	7.15	0.00391	HCD (High Energy Collision Dissociation)	MS2	24.9412	21.738	18.8046	8136	MS201900102_Con1.raw	F1		54	39	32	0.000317811	0	0.001011	25315370	19.01
		FALSE	High	Mascot (A5)	Unambiguous	[R].VHIEIGPDGR.[V]		3	3	P70333; O35737; Q9Z2X1	P70333; O35737; Q9Z2X1	0	2	1	0	1	1	546.798	1092.59	1092.58	8.72	0.00476	HCD (High Energy Collision Dissociation)	MS2	32.8547	11.508	19.2393	8634	MS201900102_Con1.raw	F1		54	39	32	0.000338212	0.0004707	0.005302	25315370	19.01
		FALSE	High	Mascot (A5)	Unambiguous	[R].VHIEIGPDGR.[V]		3	3	P70333; O35737; Q9Z2X1	P70333; O35737; Q9Z2X1	0	2	1	0	1	1	546.798	1092.59	1092.58	8.61	0.0047	HCD (High Energy Collision Dissociation)	MS2	35.6228	4.047	18.3666	7628	MS201900102_Con1.raw	F1		37	39	32	0.0173448	0.001254	0.04473	175867744	18.19
		FALSE	High	Mascot (A5)	Unambiguous	[R].VHIEIGPDGR.[V]		3	3	P70333; O35737; Q9Z2X1	P70333; O35737; Q9Z2X1	0	2	0.6111	0	1	1	546.798	1092.59	1092.58	7.82	0.00427	HCD (High Energy Collision Dissociation)	MS2	86.143	8.048	17.9358	7134	MS201900102_Con1.raw	F1		18	39	32	1.4695	0.004207	0.1521	175867744	18.19
	FALSE	High	[R].EGRPSGEAFVELESEDEVK.[L]			0.000110878	0	2	2	16	P70333; O35737	P70333 [50-68]; O35737 [50-68]	0	2106.98	0	100	Shared	High	High	0	7.828e-05	56	33.01	R.EGRPSGEAFVELESEDEVK.L	[50-68]		Used
		Checked	Confidence	Identifying Node	PSM Ambiguity	Annotated Sequence	Modifications	# Protein Groups	# Proteins	Master Protein Accessions	Protein Accessions	# Missed Cleavages	Charge	DeltaScore	DeltaCn	Rank	Search Engine Rank	m/z [Da]	MH+ [Da]	Theo. MH+ [Da]	DeltaM [ppm]	Deltam/z [Da]	Activation Type	MS Order	Isolation Interference [%]	Ion Inject Time [ms]	RT [min]	First Scan	Spectrum File	File ID	Quan Info	Ions Score	Identity Strict	Identity Relaxed	Expectation Value	Percolator q-Value	Percolator PEP	Precursor Abundance	Apex RT [min]
		FALSE	High	Mascot (A5)	Unambiguous	[R].EGRPSGEAFVELESEDEVK.[L]		2	2	P70333; O35737	P70333; O35737	0	3	1	0	1	1	703.005	2107	2106.98	8.83	0.0062	HCD (High Energy Collision Dissociation)	MS2	83.4794	7.593	34.0841	18499	MS201900102_Con1.raw	F1		16	44	37	7.67545	0	0.001034	34591808	33.01
		FALSE	High	Mascot (A5)	Unambiguous	[R].EGRPSGEAFVELESEDEVK.[L]		2	2	P70333; O35737	P70333; O35737	0	3	1	0	1	1	703.005	2107	2106.98	8.49	0.00596	HCD (High Energy Collision Dissociation)	MS2	79.5829	13.839	36.8206	21102	MS201900102_Con1.raw	F1		15	44	37	9.15275	0	0.0005965	1.47032e+06	36.71
		FALSE	High	Mascot (A5)	Unambiguous	[R].EGRPSGEAFVELESEDEVK.[L]		2	2	P70333; O35737	P70333; O35737	0	3	1	0	1	1	703.005	2107	2106.98	7.88	0.00553	HCD (High Energy Collision Dissociation)	MS2	60.8541	21.003	37.3036	21669	MS201900102_Con1.raw	F1		23	45	38	1.56736	0	9.966e-05	1.47032e+06	36.71
		FALSE	High	Mascot (A5)	Unambiguous	[R].EGRPSGEAFVELESEDEVK.[L]		2	2	P70333; O35737	P70333; O35737	0	3	1	0	1	1	703.004	2107	2106.98	7.7	0.00541	HCD (High Energy Collision Dissociation)	MS2	7.43558	2.691	33.2209	17799	MS201900102_Con1.raw	F1		56	45	38	0.000798555	0	7.828e-05	34591808	33.01
		FALSE	High	Mascot (A5)	Unambiguous	[R].EGRPSGEAFVELESEDEVK.[L]		2	2	P70333; O35737	P70333; O35737	0	3	1	0	1	1	703.004	2107	2106.98	7.01	0.00492	HCD (High Energy Collision Dissociation)	MS2	56.745	8.229	33.6429	18131	MS201900102_Con1.raw	F1		23	45	38	1.69671	0	0.0001006	34591808	33.01
		FALSE	High	Mascot (A5)	Unambiguous	[R].EGRPSGEAFVELESEDEVK.[L]		2	2	P70333; O35737	P70333; O35737	0	3	1	0	1	1	703.004	2107	2106.98	6.57	0.00462	HCD (High Energy Collision Dissociation)	MS2	70.574	8.002	32.7986	17481	MS201900102_Con1.raw	F1		22	45	38	1.8387	0	0.0001155	34591808	33.01
		FALSE	High	Mascot (A5)	Unambiguous	[R].EGRPSGEAFVELESEDEVK.[L]		2	2	P70333; O35737	P70333; O35737	0	3	1	0	1	1	703.004	2107	2106.98	6.57	0.00462	HCD (High Energy Collision Dissociation)	MS2	86.4013	11.379	35.9318	20119	MS201900102_Con1.raw	F1		9	45	38	36.1835	0	0.0006333
		FALSE	High	Mascot (A5)	Unambiguous	[R].EGRPSGEAFVELESEDEVK.[L]		2	2	P70333; O35737	P70333; O35737	0	3	1	0	1	1	703.006	2107	2106.98	10.48	0.00736	HCD (High Energy Collision Dissociation)	MS2	68.6569	14.786	36.3869	20613	MS201900102_Con1.raw	F1		21	44	37	2.46803	0	0.0001078	1.47032e+06	36.71
		FALSE	High	Mascot (A5)	Unambiguous	[R].EGRPSGEAFVELESEDEVK.[L]		2	2	P70333; O35737	P70333; O35737	0	3	1	0	1	1	703.005	2107	2106.98	8.14	0.00572	HCD (High Energy Collision Dissociation)	MS2	82.1681	12.089	34.5603	18886	MS201900102_Con1.raw	F1		8	45	38	55.9834	0.0004707	0.01539
		FALSE	High	Mascot (A5)	Unambiguous	[R].EGRPSGEAFVELESEDEVK.[L]		2	2	P70333; O35737	P70333; O35737	0	3	1	0	1	1	703.004	2107	2106.98	6.92	0.00486	HCD (High Energy Collision Dissociation)	MS2	52.7608	25	38.5759	23162	MS201900102_Con1.raw	F1		12	45	38	20.3308	0.0004707	0.003218
		FALSE	High	Mascot (A5)	Unambiguous	[R].EGRPSGEAFVELESEDEVK.[L]		2	2	P70333; O35737	P70333; O35737	0	3	1	0	1	1	703.003	2106.99	2106.98	5.88	0.00413	HCD (High Energy Collision Dissociation)	MS2	85.2621	11.694	37.792	22252	MS201900102_Con1.raw	F1		14	45	38	13.6412	0.0004707	0.004336	1.47032e+06	36.71
		FALSE	High	Mascot (A5)	Unambiguous	[R].EGRPSGEAFVELESEDEVK.[L]		2	2	P70333; O35737	P70333; O35737	0	3	1	0	1	1	703.006	2107	2106.98	9.79	0.00687	HCD (High Energy Collision Dissociation)	MS2	82.0219	25	39.1068	23767	MS201900102_Con1.raw	F1		18	44	37	5.03107	0.0004707	0.002985
		FALSE	High	Mascot (A5)	Unambiguous	[R].EGRPSGEAFVELESEDEVK.[L]		2	2	P70333; O35737	P70333; O35737	0	3	1	0	1	1	703.006	2107	2106.98	9.88	0.00694	HCD (High Energy Collision Dissociation)	MS2	88.2823	7.465	31.6306	16494	MS201900102_Con1.raw	F1		6	44	37	82.7126	0.0004707	0.03545
		FALSE	High	Mascot (A5)	Unambiguous	[R].EGRPSGEAFVELESEDEVK.[L]		2	2	P70333; O35737	P70333; O35737	0	3	1	0	1	1	703.003	2106.99	2106.98	5.44	0.00382	HCD (High Energy Collision Dissociation)	MS2	88.9054	7.432	35.4847	19677	MS201900102_Con1.raw	F1		4	45	38	133.383	0.001254	0.04162
		FALSE	High	Mascot (A5)	Unambiguous	[R].EGRPSGEAFVELESEDEVK.[L]		2	2	P70333; O35737	P70333; O35737	0	3	1	0	1	1	703.003	2107	2106.98	6.05	0.00425	HCD (High Energy Collision Dissociation)	MS2	86.6063	7.192	35.0549	19279	MS201900102_Con1.raw	F1		5	45	38	105.449	0.003883	0.1206
		FALSE	High	Mascot (A5)	Unambiguous	[R].EGRPSGEAFVELESEDEVK.[L]		2	2	P70333; O35737	P70333; O35737	0	3	1	0	1	1	703.005	2107	2106.98	8.22	0.00578	HCD (High Energy Collision Dissociation)	MS2	86.9286	18.868	39.6314	24390	MS201900102_Con1.raw	F1		5	45	38	89.6193	0.007466	0.1898
	FALSE	High	[-].MMLSTEGR.[E]	1xAcetyl [N-Term]; 2xOxidation [M1; M2]	P70333 1xAcetyl [N-Term]	0.0139639	0.000581891	1	1	1	P70333	P70333 [1-8]	0	998.428	0		No Quan Values	High	High	0.0004707	0.0116	15		-.MMLSTEGR.E	[1-8]	1xAcetyl [N-Term]	Not Used
		Checked	Confidence	Identifying Node	PSM Ambiguity	Annotated Sequence	Modifications	# Protein Groups	# Proteins	Master Protein Accessions	Protein Accessions	# Missed Cleavages	Charge	DeltaScore	DeltaCn	Rank	Search Engine Rank	m/z [Da]	MH+ [Da]	Theo. MH+ [Da]	DeltaM [ppm]	Deltam/z [Da]	Activation Type	MS Order	Isolation Interference [%]	Ion Inject Time [ms]	RT [min]	First Scan	Spectrum File	File ID	Quan Info	Ions Score	Identity Strict	Identity Relaxed	Expectation Value	Percolator q-Value	Percolator PEP	Precursor Abundance	Apex RT [min]
		FALSE	High	Mascot (A5)	Unambiguous	[-].mmLSTEGR.[E]	N-Term(Acetyl); M1(Oxidation); M2(Oxidation)	1	1	P70333	P70333	0	2	1	0	1	1	499.722	998.437	998.428	8.5	0.00424	HCD (High Energy Collision Dissociation)	MS2	19.6527	25	17.8123	6996	MS201900102_Con1.raw	F1		15	39	32	2.97475	0.0004707	0.0116
	FALSE	High	[R].STGEAFVQFASQEIAEK.[A]	1xAcetyl [N-Term]	P70333 1xAcetyl [N-Term]; O35737 1xAcetyl [N-Term]	0.00279845	0.000581891	2	2	1	P70333; O35737	P70333 [151-167]; O35737 [151-167]	0	1883.9	0		No Quan Values	High	High	0.0004707	0.002211	31		R.STGEAFVQFASQEIAEK.A	[151-167]	1xAcetyl [N-Term]	Not Used
		Checked	Confidence	Identifying Node	PSM Ambiguity	Annotated Sequence	Modifications	# Protein Groups	# Proteins	Master Protein Accessions	Protein Accessions	# Missed Cleavages	Charge	DeltaScore	DeltaCn	Rank	Search Engine Rank	m/z [Da]	MH+ [Da]	Theo. MH+ [Da]	DeltaM [ppm]	Deltam/z [Da]	Activation Type	MS Order	Isolation Interference [%]	Ion Inject Time [ms]	RT [min]	First Scan	Spectrum File	File ID	Quan Info	Ions Score	Identity Strict	Identity Relaxed	Expectation Value	Percolator q-Value	Percolator PEP	Precursor Abundance	Apex RT [min]
		FALSE	High	Mascot (A5)	Unambiguous	[R].sTGEAFVQFASQEIAEK.[A]	N-Term(Acetyl)	2	2	P70333; O35737	P70333; O35737	0	2	1	0	1	1	942.463	1883.92	1883.9	9.07	0.00854	HCD (High Energy Collision Dissociation)	MS2	50.8756	25	57.4389	40068	MS201900102_Con1.raw	F1		31	43	36	0.212927	0.0004707	0.002211	305301	57.61
	FALSE	High	[K].HTGPNSPDTANDGFVR.[L]	1xPhospho [S6]	P70333 1xPhospho [S104]; O35737 1xPhospho [S104]	0.0312614	0.000581891	2	2	1	P70333; O35737	P70333 [99-114]; O35737 [99-114]	0	1764.73	0	100	Shared	High	High	0.0004707	0.02677	86	18.7	K.HTGPNSPDTANDGFVR.L	[99-114]	1xPhospho [S104]	Used
		Checked	Confidence	Identifying Node	PSM Ambiguity	Annotated Sequence	Modifications	# Protein Groups	# Proteins	Master Protein Accessions	Protein Accessions	# Missed Cleavages	Charge	DeltaScore	DeltaCn	Rank	Search Engine Rank	m/z [Da]	MH+ [Da]	Theo. MH+ [Da]	DeltaM [ppm]	Deltam/z [Da]	Activation Type	MS Order	Isolation Interference [%]	Ion Inject Time [ms]	RT [min]	First Scan	Spectrum File	File ID	Quan Info	Ions Score	Identity Strict	Identity Relaxed	Expectation Value	Percolator q-Value	Percolator PEP	Precursor Abundance	Apex RT [min]
		FALSE	High	Mascot (A5)	Unambiguous	[K].HTGPNsPDTANDGFVR.[L]	S6(Phospho)	2	2	P70333; O35737	P70333; O35737	0	2	0.3023	0	1	1	882.876	1764.74	1764.73	5.8	0.00511	HCD (High Energy Collision Dissociation)	MS2	0	25	18.5535	7841	MS201900102_Con1.raw	F1		86	43	36	5.37365e-07	0.0004707	0.02677	4294910	18.7
	FALSE	High	[R].DLNYCFSGMSDHR.[Y]	1xPhospho [Y4]	P70333 1xPhospho [Y266]; O35737 1xPhospho [Y266]	0.0310989	0.000581891	2	2	1	P70333; O35737	P70333 [263-275]; O35737 [263-275]	0	1624.59	0	100	Shared	High	High	0.0004707	0.02662	21	39.2	R.DLNYCFSGMSDHR.Y	[263-275]	1xPhospho [Y266]	Used
		Checked	Confidence	Identifying Node	PSM Ambiguity	Annotated Sequence	Modifications	# Protein Groups	# Proteins	Master Protein Accessions	Protein Accessions	# Missed Cleavages	Charge	DeltaScore	DeltaCn	Rank	Search Engine Rank	m/z [Da]	MH+ [Da]	Theo. MH+ [Da]	DeltaM [ppm]	Deltam/z [Da]	Activation Type	MS Order	Isolation Interference [%]	Ion Inject Time [ms]	RT [min]	First Scan	Spectrum File	File ID	Quan Info	Ions Score	Identity Strict	Identity Relaxed	Expectation Value	Percolator q-Value	Percolator PEP	Precursor Abundance	Apex RT [min]
		FALSE	High	Mascot (A5)	Unambiguous	[R].DLNyCFSGMSDHR.[Y]	Y4(Phospho)	2	2	P70333; O35737	P70333; O35737	0	2	1	0	1	1	812.803	1624.6	1624.59	3.81	0.00309	HCD (High Energy Collision Dissociation)	MS2	68.6109	25	39.1114	23773	MS201900102_Con1.raw	F1		21	40	33	0.746146	0.0004707	0.02662	868716	39.2
	FALSE	High	[K].SNSVEMDWVLK.[H]	1xOxidation [M6]		0.0468631	0.00154131	1	1	1	P70333	P70333 [88-98]	0	1323.62	0		No Quan Values	High	High	0.001254	0.0405	7		K.SNSVEMDWVLK.H	[88-98]		Not Used
		Checked	Confidence	Identifying Node	PSM Ambiguity	Annotated Sequence	Modifications	# Protein Groups	# Proteins	Master Protein Accessions	Protein Accessions	# Missed Cleavages	Charge	DeltaScore	DeltaCn	Rank	Search Engine Rank	m/z [Da]	MH+ [Da]	Theo. MH+ [Da]	DeltaM [ppm]	Deltam/z [Da]	Activation Type	MS Order	Isolation Interference [%]	Ion Inject Time [ms]	RT [min]	First Scan	Spectrum File	File ID	Quan Info	Ions Score	Identity Strict	Identity Relaxed	Expectation Value	Percolator q-Value	Percolator PEP	Precursor Abundance	Apex RT [min]
		FALSE	High	Mascot (A5)	Unambiguous	[K].SNSVEmDWVLK.[H]	M6(Oxidation)	1	1	P70333	P70333	0	2	0.2857	0	1	1	662.321	1323.63	1323.62	7.47	0.00494	HCD (High Energy Collision Dissociation)	MS2		25	32.831	17512	MS201900102_Con1.raw	F1		7	42	35	33.1673	0.001254	0.0405	2.49501e+06	33.03
FALSE	High	Master Protein	Q501J6	Probable ATP-dependent RNA helicase DDX17 OS=Mus musculus OX=10090 GN=Ddx17 PE=1 SV=1	0	54.675	30	17	30	13	1	650	72.4	8.59	594	17	cell differentiation;cell organization and biogenesis;defense response;metabolic process;regulation of biological process;response to stimulus	cytoplasm;cytosol;membrane;nucleus	catalytic activity;nucleotide binding;protein binding;RNA binding	Pf00270, Pf00271	67040		Ddx17	15			0	100	High
	Checked	Confidence	Annotated Sequence	Modifications	Modifications in Master Proteins	Qvality PEP	Qvality q-value	# Protein Groups	# Proteins	# PSMs	Master Protein Accessions	Positions in Master Proteins	# Missed Cleavages	Theo. MH+ [Da]	# Razor Quan Results	Abundances (Scaled): F1: Sample	Quan Info	Found in Sample: [S1] F1: Sample	Confidence (by Search Engine): Mascot	Percolator q-Value (by Search Engine): Mascot	Percolator PEP (by Search Engine): Mascot	Ions Score (by Search Engine): Mascot	Top Apex RT [min]	Sequence in Protein	Positions in Protein	Peptide Group Modifications in Protein	Quan Usage
	FALSE	High	[K].FVINYDYPNSSEDYVHR.[I]			2.45084e-05	0	1	1	1	Q501J6	Q501J6 [410-426]	0	2117.96	0	100		High	High	0	1.648e-05	46	37.07	K.FVINYDYPNSSEDYVHR.I	[410-426]		Used
		Checked	Confidence	Identifying Node	PSM Ambiguity	Annotated Sequence	Modifications	# Protein Groups	# Proteins	Master Protein Accessions	Protein Accessions	# Missed Cleavages	Charge	DeltaScore	DeltaCn	Rank	Search Engine Rank	m/z [Da]	MH+ [Da]	Theo. MH+ [Da]	DeltaM [ppm]	Deltam/z [Da]	Activation Type	MS Order	Isolation Interference [%]	Ion Inject Time [ms]	RT [min]	First Scan	Spectrum File	File ID	Quan Info	Ions Score	Identity Strict	Identity Relaxed	Expectation Value	Percolator q-Value	Percolator PEP	Precursor Abundance	Apex RT [min]
		FALSE	High	Mascot (A5)	Unambiguous	[K].FVINYDYPNSSEDYVHR.[I]		1	1	Q501J6	Q501J6	0	3	1	0	1	1	706.665	2117.98	2117.96	11.28	0.00796	HCD (High Energy Collision Dissociation)	MS2	16.6293	9.964	37.0553	21374	MS201900102_Con1.raw	F1		46	45	38	0.00788612	0	1.648e-05	4177031	37.07
	FALSE	High	[K].TLAYLLPAIVHINHQPYLER.[G]			0.000596643	0	1	1	1	Q501J6	Q501J6 [143-162]	0	2361.31	0		No Quan Values	High	High	0	0.0004455	35		K.TLAYLLPAIVHINHQPYLER.G	[143-162]		Not Used
		Checked	Confidence	Identifying Node	PSM Ambiguity	Annotated Sequence	Modifications	# Protein Groups	# Proteins	Master Protein Accessions	Protein Accessions	# Missed Cleavages	Charge	DeltaScore	DeltaCn	Rank	Search Engine Rank	m/z [Da]	MH+ [Da]	Theo. MH+ [Da]	DeltaM [ppm]	Deltam/z [Da]	Activation Type	MS Order	Isolation Interference [%]	Ion Inject Time [ms]	RT [min]	First Scan	Spectrum File	File ID	Quan Info	Ions Score	Identity Strict	Identity Relaxed	Expectation Value	Percolator q-Value	Percolator PEP	Precursor Abundance	Apex RT [min]
		FALSE	High	Mascot (A5)	Unambiguous	[K].TLAYLLPAIVHINHQPYLER.[G]		1	1	Q501J6	Q501J6	0	3	1	0	1	1	787.781	2361.33	2361.31	9.39	0.00739	HCD (High Energy Collision Dissociation)	MS2	52.3928	25	47.8062	33735	MS201900102_Con1.raw	F1		35	33	26	0.00847551	0	0.0004455
	FALSE	High	[R].SSQSSSQQFSGIGR.[S]			7.42718e-06	0	1	1	1	Q501J6	Q501J6 [592-605]	0	1455.68	0	100		High	High	0	4.789e-06	84	17.93	R.SSQSSSQQFSGIGR.S	[592-605]		Used
		Checked	Confidence	Identifying Node	PSM Ambiguity	Annotated Sequence	Modifications	# Protein Groups	# Proteins	Master Protein Accessions	Protein Accessions	# Missed Cleavages	Charge	DeltaScore	DeltaCn	Rank	Search Engine Rank	m/z [Da]	MH+ [Da]	Theo. MH+ [Da]	DeltaM [ppm]	Deltam/z [Da]	Activation Type	MS Order	Isolation Interference [%]	Ion Inject Time [ms]	RT [min]	First Scan	Spectrum File	File ID	Quan Info	Ions Score	Identity Strict	Identity Relaxed	Expectation Value	Percolator q-Value	Percolator PEP	Precursor Abundance	Apex RT [min]
		FALSE	High	Mascot (A5)	Unambiguous	[R].SSQSSSQQFSGIGR.[S]		1	1	Q501J6	Q501J6	0	2	0.881	0	1	1	728.346	1455.69	1455.68	2.37	0.00173	HCD (High Energy Collision Dissociation)	MS2	0	25	17.8027	6986	MS201900102_Con1.raw	F1		84	42	35	6.99539e-07	0	4.789e-06	13536618	17.93
	FALSE	High	[R].MLDMGFEPQIR.[RK]			0.001927	0	3	5	1	Q501J6; Q62167; Q61656	Q501J6 [251-261]; Q62167 [352-362]; Q61656 [253-263]	0	1336.64	0	100	Shared	High	High	0	0.001502	66	42.84	R.MLDMGFEPQIR.K	[251-261]		Not Used
		Checked	Confidence	Identifying Node	PSM Ambiguity	Annotated Sequence	Modifications	# Protein Groups	# Proteins	Master Protein Accessions	Protein Accessions	# Missed Cleavages	Charge	DeltaScore	DeltaCn	Rank	Search Engine Rank	m/z [Da]	MH+ [Da]	Theo. MH+ [Da]	DeltaM [ppm]	Deltam/z [Da]	Activation Type	MS Order	Isolation Interference [%]	Ion Inject Time [ms]	RT [min]	First Scan	Spectrum File	File ID	Quan Info	Ions Score	Identity Strict	Identity Relaxed	Expectation Value	Percolator q-Value	Percolator PEP	Precursor Abundance	Apex RT [min]
		FALSE	High	Mascot (A5)	Unambiguous	[R].MLDMGFEPQIR.[RK]		3	5	Q501J6; Q62167; Q61656	Q62095; Q501J6; Q62167; Q61656; P16381	0	2	0.8636	0	1	1	668.828	1336.65	1336.64	8.06	0.00539	HCD (High Energy Collision Dissociation)	MS2	44.1262	25	42.6216	27901	MS201900102_Con1.raw	F1		66	42	35	3.96921e-05	0	0.001502	13857688	42.84
	FALSE	High	[K].LIQLMEEIMAEK.[E]			0.00156985	0	1	1	2	Q501J6	Q501J6 [327-338]	0	1447.75	0	100		High	High	0	0.00121	55	58.58	K.LIQLMEEIMAEK.E	[327-338]		Used
		Checked	Confidence	Identifying Node	PSM Ambiguity	Annotated Sequence	Modifications	# Protein Groups	# Proteins	Master Protein Accessions	Protein Accessions	# Missed Cleavages	Charge	DeltaScore	DeltaCn	Rank	Search Engine Rank	m/z [Da]	MH+ [Da]	Theo. MH+ [Da]	DeltaM [ppm]	Deltam/z [Da]	Activation Type	MS Order	Isolation Interference [%]	Ion Inject Time [ms]	RT [min]	First Scan	Spectrum File	File ID	Quan Info	Ions Score	Identity Strict	Identity Relaxed	Expectation Value	Percolator q-Value	Percolator PEP	Precursor Abundance	Apex RT [min]
		FALSE	High	Mascot (A5)	Unambiguous	[K].LIQLMEEIMAEK.[E]		1	1	Q501J6	Q501J6	0	2	0.8727	0	1	1	724.389	1447.77	1447.75	11.95	0.00865	HCD (High Energy Collision Dissociation)	MS2	12.141	25	58.5842	41313	MS201900102_Con1.raw	F1		55	40	33	0.000335026	0	0.00121	1911435	58.58
		FALSE	High	Mascot (A5)	Unambiguous	[K].LIQLMEEIMAEK.[E]		1	1	Q501J6	Q501J6	0	2	1	0	1	1	724.384	1447.76	1447.75	4.95	0.00358	HCD (High Energy Collision Dissociation)	MS2	65.6758	25	58.0993	40783	MS201900102_Con1.raw	F1		16	40	33	2.97404	0.0004707	0.005748	1911435	58.58
	FALSE	High	[K].LIQLMEEIMAEKENK.[T]			0.000207323	0	1	1	1	Q501J6	Q501J6 [327-341]	1	1818.93	0		No Quan Values	High	High	0	0.0001501	52		K.LIQLMEEIMAEKENK.T	[327-341]		Not Used
		Checked	Confidence	Identifying Node	PSM Ambiguity	Annotated Sequence	Modifications	# Protein Groups	# Proteins	Master Protein Accessions	Protein Accessions	# Missed Cleavages	Charge	DeltaScore	DeltaCn	Rank	Search Engine Rank	m/z [Da]	MH+ [Da]	Theo. MH+ [Da]	DeltaM [ppm]	Deltam/z [Da]	Activation Type	MS Order	Isolation Interference [%]	Ion Inject Time [ms]	RT [min]	First Scan	Spectrum File	File ID	Quan Info	Ions Score	Identity Strict	Identity Relaxed	Expectation Value	Percolator q-Value	Percolator PEP	Precursor Abundance	Apex RT [min]
		FALSE	High	Mascot (A5)	Unambiguous	[K].LIQLMEEIMAEKENK.[T]		1	1	Q501J6	Q501J6	1	3	0.9423	0	1	1	606.989	1818.95	1818.93	10.68	0.00647	HCD (High Energy Collision Dissociation)	MS2	0	25	46.5579	32354	MS201900102_Con1.raw	F1		52	41	34	0.000916051	0	0.0001501	892146	46.51
	FALSE	High	[K].APILIATDVASR.[G]			0.000130513	0	2	2	2	Q501J6; Q61656	Q501J6 [390-401]; Q61656 [392-403]	0	1226.71	0	100	Shared	High	High	0	0.000329	75	31.61	K.APILIATDVASR.G	[390-401]		Not Used
		Checked	Confidence	Identifying Node	PSM Ambiguity	Annotated Sequence	Modifications	# Protein Groups	# Proteins	Master Protein Accessions	Protein Accessions	# Missed Cleavages	Charge	DeltaScore	DeltaCn	Rank	Search Engine Rank	m/z [Da]	MH+ [Da]	Theo. MH+ [Da]	DeltaM [ppm]	Deltam/z [Da]	Activation Type	MS Order	Isolation Interference [%]	Ion Inject Time [ms]	RT [min]	First Scan	Spectrum File	File ID	Quan Info	Ions Score	Identity Strict	Identity Relaxed	Expectation Value	Percolator q-Value	Percolator PEP	Precursor Abundance	Apex RT [min]
		FALSE	High	Mascot (A5)	Unambiguous	[K].APILIATDVASR.[G]		2	2	Q501J6; Q61656	Q501J6; Q61656	0	2	0.9844	0	1	1	613.866	1226.73	1226.71	12.09	0.00742	HCD (High Energy Collision Dissociation)	MS2	50.816	16.525	31.3811	16288	MS201900102_Con1.raw	F1		64	36	29	1.76348e-05	0	9.29e-05	84206760	31.61
		FALSE	High	Mascot (A5)	Unambiguous	[K].APILIATDVASR.[G]		2	2	Q501J6; Q61656	Q501J6; Q61656	0	2	0.96	0	1	1	613.863	1226.72	1226.71	7.12	0.00436	HCD (High Energy Collision Dissociation)	MS2	7.05656	11.195	31.8066	16649	MS201900102_Con1.raw	F1		75	36	29	1.672e-06	0	0.000329	84206760	31.61
	FALSE	High	[R].ELAQQVQQVADDYGK.[C]			6.83459e-05	0	1	1	2	Q501J6	Q501J6 [176-190]	0	1691.82	0	100		High	High	0	0.0001123	49	37.47	R.ELAQQVQQVADDYGK.C	[176-190]		Used
		Checked	Confidence	Identifying Node	PSM Ambiguity	Annotated Sequence	Modifications	# Protein Groups	# Proteins	Master Protein Accessions	Protein Accessions	# Missed Cleavages	Charge	DeltaScore	DeltaCn	Rank	Search Engine Rank	m/z [Da]	MH+ [Da]	Theo. MH+ [Da]	DeltaM [ppm]	Deltam/z [Da]	Activation Type	MS Order	Isolation Interference [%]	Ion Inject Time [ms]	RT [min]	First Scan	Spectrum File	File ID	Quan Info	Ions Score	Identity Strict	Identity Relaxed	Expectation Value	Percolator q-Value	Percolator PEP	Precursor Abundance	Apex RT [min]
		FALSE	High	Mascot (A5)	Unambiguous	[R].ELAQQVQQVADDYGK.[C]		1	1	Q501J6	Q501J6	0	2	1	0	1	1	846.424	1691.84	1691.82	9.97	0.00844	HCD (High Energy Collision Dissociation)	MS2	0	25	37.7681	22224	MS201900102_Con1.raw	F1		42	43	36	0.01442	0	4.749e-05	8648956	37.47
		FALSE	High	Mascot (A5)	Unambiguous	[R].ELAQQVQQVADDYGK.[C]		1	1	Q501J6	Q501J6	0	2	0.9796	0	1	1	846.423	1691.84	1691.82	8.53	0.00722	HCD (High Energy Collision Dissociation)	MS2	53.4049	25	37.293	21655	MS201900102_Con1.raw	F1		49	43	36	0.00266725	0	0.0001123	8648956	37.47
	FALSE	High	[R].MLDMGFEPQIR.[RK]	1xOxidation [M]		0.00379548	0.000581891	3	5	3	Q501J6; Q62167; Q61656	Q501J6 [251-261]; Q62167 [352-362]; Q61656 [253-263]	0	1352.63	0	100	Shared	High	High	0.0004707	0.004584	66	34.03	R.MLDMGFEPQIR.K	[251-261]		Not Used
		Checked	Confidence	Identifying Node	PSM Ambiguity	Annotated Sequence	Modifications	# Protein Groups	# Proteins	Master Protein Accessions	Protein Accessions	# Missed Cleavages	Charge	DeltaScore	DeltaCn	Rank	Search Engine Rank	m/z [Da]	MH+ [Da]	Theo. MH+ [Da]	DeltaM [ppm]	Deltam/z [Da]	Activation Type	MS Order	Isolation Interference [%]	Ion Inject Time [ms]	RT [min]	First Scan	Spectrum File	File ID	Quan Info	Ions Score	Identity Strict	Identity Relaxed	Expectation Value	Percolator q-Value	Percolator PEP	Precursor Abundance	Apex RT [min]
		FALSE	High	Mascot (A5)	Unambiguous	[R].mLDMGFEPQIR.[RK]	M1(Oxidation)	3	5	Q501J6; Q62167; Q61656	Q62095; Q501J6; Q62167; Q61656; P16381	0	2	0.9091	0	1	1	676.826	1352.65	1352.63	8.75	0.00592	HCD (High Energy Collision Dissociation)	MS2	49.5547	21.76	38.9451	23575	MS201900102_Con1.raw	F1		22	42	35	0.999374	0.0004707	0.01871
		FALSE	High	Mascot (A5)	Unambiguous	[R].MLDmGFEPQIR.[RK]	M4(Oxidation)	3	5	Q501J6; Q62167; Q61656	Q62095; Q501J6; Q62167; Q61656; P16381	0	2	0.8036	0	1	1	676.824	1352.64	1352.63	5.14	0.00348	HCD (High Energy Collision Dissociation)	MS2	24.3123	17.861	33.8976	18347	MS201900102_Con1.raw	F1		56	42	35	0.000435731	0.0004707	0.003027	9258546	34.03
		FALSE	High	Mascot (A5)	Unambiguous	[R].mLDMGFEPQIR.[RK]	M1(Oxidation)	3	5	Q501J6; Q62167; Q61656	Q62095; Q501J6; Q62167; Q61656; P16381	0	2	0.7879	0	1	1	676.826	1352.64	1352.63	8.03	0.00543	HCD (High Energy Collision Dissociation)	MS2	20.3918	25	38.03	22539	MS201900102_Con1.raw	F1		66	42	35	4.01974e-05	0.0004707	0.004584	7576449	38.16
	FALSE	High	[R].QTLMWSATWPK.[E]			0.00612224	0.000581891	2	2	2	Q501J6; Q61656	Q501J6 [272-282]; Q61656 [274-284]	0	1348.67	0	100	Shared	High	High	0.0004707	0.004959	33	44.86	R.QTLMWSATWPK.E	[272-282]		Not Used
		Checked	Confidence	Identifying Node	PSM Ambiguity	Annotated Sequence	Modifications	# Protein Groups	# Proteins	Master Protein Accessions	Protein Accessions	# Missed Cleavages	Charge	DeltaScore	DeltaCn	Rank	Search Engine Rank	m/z [Da]	MH+ [Da]	Theo. MH+ [Da]	DeltaM [ppm]	Deltam/z [Da]	Activation Type	MS Order	Isolation Interference [%]	Ion Inject Time [ms]	RT [min]	First Scan	Spectrum File	File ID	Quan Info	Ions Score	Identity Strict	Identity Relaxed	Expectation Value	Percolator q-Value	Percolator PEP	Precursor Abundance	Apex RT [min]
		FALSE	High	Mascot (A5)	Unambiguous	[R].QTLMWSATWPK.[E]		2	2	Q501J6; Q61656	Q501J6; Q61656	0	2	1	0	1	1	674.845	1348.68	1348.67	8.4	0.00567	HCD (High Energy Collision Dissociation)	MS2	0	25	44.6577	30167	MS201900102_Con1.raw	F1		33	41	34	0.0710057	0.0004707	0.004959	11639340	44.86
		FALSE	High	Mascot (A5)	Unambiguous	[R].QTLMWSATWPK.[E]		2	2	Q501J6; Q61656	Q501J6; Q61656	0	2	0.8235	0	1	1	674.83	1348.65	1348.67	-14.59	-0.00984	HCD (High Energy Collision Dissociation)	MS2	27.1331	25	57.6873	40343	MS201900102_Con1.raw	F1	Not Reliable	17	42	35	3.26477	0.003883	0.1208
	FALSE	High	[R].QTLMWSATWPK.[E]	1xOxidation [M4]		0.0124412	0.000581891	2	2	1	Q501J6; Q61656	Q501J6 [272-282]; Q61656 [274-284]	0	1364.67	0		No Quan Values	High	High	0.0004707	0.01031	8		R.QTLMWSATWPK.E	[272-282]		Not Used
[truncated: 7,414 more rows]

## Sheet: Proteins(PKA)
Checked	Protein FDR Confidence: Combined	Master	Accession	Description	Exp. q-value: Combined	Sum PEP Score	Coverage [%]	# Peptides	# PSMs	# Unique Peptides	# Protein Groups	# AAs	MW [kDa]	calc. pI	Score Mascot: Mascot	# Peptides (by Search Engine): Mascot	Biological Process	Cellular Component	Molecular Function	Pfam IDs	Entrez Gene ID	Ensembl Gene ID	Gene Symbol	Chromosome	WikiPathways	KEGG Pathways	# Razor Peptides	Abundances (Scaled): F2: Sample	Found in Sample: [S2] F2: Sample	Modifications
[truncated: 10,420 more rows]
